# Supplementary material for: Improving the Identification and Coverage of Plant Transmembrane Proteins in Medicago Using Bottom–Up Proteomics
Source: Front Plant Sci. 2020 Dec 18;11:595726. doi: 10.3389/fpls.2020.595726 (PMC7775423; doi:10.3389/fpls.2020.595726)
Supplement: Supplementary file 2 [file Table_2.xlsx]

## Sheet: Protein groups
Protein FDR Confidence	Master	Accession	Description	Exp. q-value	Sum PEP Score	Coverage	# Peptides	# PSMs	# Unique Peptides	# Protein Groups	# AAs	MW [kDa]	calc. pI	Found in Sample: [S37] F37: Sample	Found in Sample: [S36] F36: Sample	Found in Sample: [S35] F35: Sample	Found in Sample: [S34] F34: Sample	Found in Sample: [S33] F33: Sample	Found in Sample: [S32] F32: Sample	Found in Sample: [S31] F31: Sample	Found in Sample: [S30] F30: Sample	Modifications	Phospho(S; T; Y) Count	emPAI	Score Sequest HT	# Peptides Sequest HT
High	Master Protein	S4T0R9	Photosystem I reaction center subunit VIII OS=Medicago truncatula GN=psaI PE=3 SV=1	0	7.763	85.2941	2	6	2	1	34	3.8	10.01	High	High	Not Found	Not Found	Not Found	High	High	High		0	9	24.83	2
High	Master Protein	G7JGC9	Nodulin-like protein OS=Medicago truncatula GN=MTR_4g082860 PE=2 SV=1	0	63.714	83.2	9	26	6	1	125	12.7	4.91	High	High	High	High	High	High	High	Not Found		0	15.681	119.3	9
High	Master Protein	A0A072UN88	NAD(P)H:quinone oxidoreductase, type IV protein OS=Medicago truncatula GN=MTR_4g091900 PE=3 SV=1	0	92.722	77.451	12	38	10	1	204	21.6	6.54	High	High	High	High	High	Not Found	Not Found	Not Found		0	30.623	137.6	12
High	Master Protein	G7I9M9	ATP synthase D chain OS=Medicago truncatula GN=MTR_1g095830 PE=2 SV=1	0	153.181	75.1412	24	90	24	1	177	21	5.57	High	High	High	High	High	High	High	High		0	700.704	316.55	24
High	Master Protein	G7IG85	Fiber protein Fb15 OS=Medicago truncatula GN=MTR_2g037990 PE=2 SV=2	0	72.615	73.8636	9	42	9	1	88	10.3	9.17	High	High	High	High	High	High	Not Found	Not Found	Deamidated [R75; R76]	0	267.27	155.17	9
High	Master Protein	I3SIG9	Chlorophyll a-b binding protein, chloroplastic OS=Medicago truncatula GN=MTR_4g094605 PE=2 SV=1	0	306.35	72.5564	22	251	9	1	266	28.3	5.66	High	High	High	High	High	High	High	High	Deamidated [Q25; R96; Q231]; Phospho [S24; S45; S46]; Carboxymethyl [K41; K42; K266]	0	3161.28	1093.34	22
High	Master Protein	A0A072UGT3	Chlorophyll a-b binding protein, chloroplastic OS=Medicago truncatula GN=MTR_6g011870 PE=3 SV=1	0	205.113	71.3208	18	220	1	1	265	28.2	5.66	Not Found	Not Found	Medium	High	Not Found	Not Found	Not Found	Not Found	Deamidated [R95; Q230]; Carboxymethyl [K40; K41]; Phospho [T39; S42; S45]	3	680.292	895.06	18
High	Master Protein	A0A072U6K7	Chlorophyll a-b binding protein, chloroplastic OS=Medicago truncatula GN=MTR_6g011880 PE=3 SV=1	0	207.596	71.3208	17	213	1	1	265	28.2	5.43	Not Found	High	High	Not Found	Not Found	Not Found	Not Found	Not Found	Deamidated [R95; Q124; Q230]; Carboxymethyl [K41]	0	463.159	880.44	17
High	Master Protein	G7INB7	ABA-responsive protein OS=Medicago truncatula GN=MTR_2g035320 PE=2 SV=1	0	82.625	68.1529	8	24	8	1	157	16.6	5.08	High	High	High	High	High	High	High	Not Found	Deamidated [Q39]	0	11.328	119.52	8
High	Master Protein	I3S6I7	Vacuolar (H+)-ATPase G subunit OS=Medicago truncatula GN=MTR_1g064540 PE=2 SV=1	0	44.735	67.8571	10	20	10	1	112	12.4	8.37	Not Found	Not Found	High	High	High	High	High	High		0	20.544	75.92	10
High	Master Protein	G8A319	ATP synthase CF1 epsilon subunit OS=Medicago truncatula GN=atpE PE=3 SV=1	0	68.748	67.6471	10	54	2	1	136	15.1	9.54	Not Found	High	Not Found	Not Found	Not Found	High	Not Found	Not Found	Deamidated [Q96; Q97]	0	24.119	181.02	10
High	Master Protein	A0A072UBA6	Photosystem II reaction center protein D OS=Medicago truncatula GN=MTR_6g077905 PE=4 SV=1	0	43.092	66.6667	4	39	1	1	72	8.1	4.56	Not Found	Not Found	High	High	High	Not Found	Not Found	Not Found	Deamidated [R14; Q21]	0	45.416	130.54	4
High	Master Protein	G7KKG9	Chlorophyll a-b binding protein, chloroplastic OS=Medicago truncatula GN=MTR_6g012080 PE=3 SV=2	0	203.792	66.4151	18	197	1	1	265	28.4	5.66	Not Found	High	Not Found	Not Found	Not Found	Not Found	Not Found	Not Found	Deamidated [R54; R95; Q230]; Carboxymethyl [K41]; Phospho [S45]	1	680.292	739.47	18
High	Master Protein	A0A072UZ59	Ribulose bisphosphate carboxylase/oxygenase activase OS=Medicago truncatula GN=MTR_3g068030 PE=4 SV=1	0	282.797	66.055	40	188	19	1	436	47.9	7.33	High	High	High	High	High	High	High	High	Deamidated [Q83; Q84; Q101; Q266]; Phospho [S80]	1	80.113	698.12	40
High	Master Protein	G7KVE1	Actin-97 OS=Medicago truncatula GN=MTR_7g093260 PE=3 SV=1	0	131.698	66.0477	24	91	4	1	377	41.7	5.49	Not Found	Not Found	High	High	High	Not Found	Not Found	Not Found	Deamidated [R97]	0	16.013	318.67	24
High	Master Protein	G7JUY1	ATP synthase subunit alpha OS=Medicago truncatula GN=MTR_4g079170 PE=4 SV=1	0	90.809	65.9864	13	89	1	1	147	15.9	4.94	High	High	High	High	Not Found	Not Found	Not Found	Not Found	Deamidated [Q97]; Phospho [T92]	1	80.113	367.55	13
High	Master Protein	G7KC69	NAD(P)H:quinone oxidoreductase, type IV protein OS=Medicago truncatula GN=MTR_5g019620 PE=4 SV=1	0	81.598	65.873	13	47	13	1	252	26.8	6.34	High	High	High	High	High	High	High	Not Found		0	14.849	179.23	13
High	Master Protein	G7L017	Actin-97 OS=Medicago truncatula GN=MTR_7g026230 PE=3 SV=1	0	126.816	65.5172	23	85	3	1	377	41.8	5.4	Not Found	Not Found	Not Found	High	High	High	Not Found	Not Found	Deamidated [R97; Q227]	0	14.571	306.43	23
High	Master Protein	G7IT85	Phosphoglycerate kinase OS=Medicago truncatula GN=MTR_2g066110 PE=3 SV=1	0	175.45	65.3445	29	80	23	1	479	50	7.14	High	High	High	High	High	High	Not Found	Not Found		0	10.406	301.44	29
High	Master Protein	G7JAX4	Actin 2 OS=Medicago truncatula GN=MTR_3g095530 PE=2 SV=2	0	157.838	65.252	24	116	5	1	377	41.7	5.49	High	High	High	High	High	High	High	High	Deamidated [R97; Q248]	0	27.943	412.9	24
High	Master Protein	I3SCJ8	RW1-like protein, putative OS=Medicago truncatula GN=MTR_8g080630 PE=2 SV=1	0	82.877	65.2174	6	26	6	1	92	11.1	8.16	High	High	High	High	High	High	Not Found	Not Found	Deamidated [Q62; Q68]	0	157.489	119.2	6
High	Master Protein	G7IIU5	Uncharacterized protein OS=Medicago truncatula GN=MTR_2g049330 PE=4 SV=2	0	110.377	64.4828	12	46	12	1	290	31.2	4.79	High	High	High	High	High	High	High	Not Found		0	10.365	205.03	12
High	Master Protein	I3S066	60S acidic ribosomal protein OS=Medicago truncatula GN=MTR_1g060600 PE=2 SV=1	0	35.611	64.2857	3	6	3	1	112	11.3	4.54	High	Not Found	High	High	High	Not Found	Not Found	Not Found		0	2.728	36.39	3
High	Master Protein	A0A072TXD2	F0F1-type ATP synthase, beta subunit OS=Medicago truncatula GN=MTR_7g033765 PE=3 SV=1	0	323.885	64.076	36	214	11	1	579	62.8	5.91	High	High	High	High	High	High	High	Not Found	Deamidated [R109; Q238; Q280; Q325; Q535; Q536]; Carboxymethyl [K191]; Phospho [T54; T62]	2	43.53	810.52	36
High	Master Protein	B7FH20	ATP synthase OS=Medicago truncatula GN=MTR_8g092040 PE=2 SV=1	0	102.191	63.5246	20	76	20	1	244	27.7	8.12	High	High	High	High	High	High	High	High	Deamidated [Q115]	0	63.938	239.36	20
High	Master Protein	A0A072TZF0	Carboxy-terminal region remorin OS=Medicago truncatula GN=MTR_8g031370 PE=4 SV=1	0	77.516	63.5	11	33	11	1	200	21.6	8.73	High	High	High	High	High	High	High	Not Found		0	9	134.01	11
High	Master Protein	G7KYU2	Porin/voltage-dependent anion-selective channel protein OS=Medicago truncatula GN=MTR_7g009330 PE=4 SV=1	0	102.028	63.1769	13	33	13	1	277	29.6	8.88	High	High	High	High	High	High	High	Not Found		0	6.743	160.33	13
High	Master Protein	A0A072U338	Phosphopyruvate hydratase OS=Medicago truncatula GN=MTR_7g103620 PE=3 SV=1	0	178.109	63.0631	24	47	23	1	444	47.8	5.8	High	High	High	High	High	High	High	Not Found		0	7.62	215.45	24
High	Master Protein	A0A072U5R4	Chlorophyll a-b binding protein, chloroplastic OS=Medicago truncatula GN=MTR_6g011890 PE=3 SV=1	0	222.757	62.6415	19	205	2	1	265	28.3	5.66	Not Found	High	Medium	High	Not Found	Not Found	Not Found	Not Found	Deamidated [R54; R95; Q230]; Carboxymethyl [K40; K41]; Phospho [S45]	1	999	825.39	19
High	Master Protein	A0A072U6U8	Plant-specific import receptor subunit TOM20 OS=Medicago truncatula GN=MTR_6g024140 PE=4 SV=1	0	114.109	62.1359	12	38	12	1	206	22.8	5.86	High	High	High	High	High	High	High	High		0	15.379	178.96	12
High	Master Protein	I3SSC7	Outer envelope pore protein OS=Medicago truncatula GN=MTR_2g096920 PE=2 SV=1	0	61.708	61.6438	7	22	7	1	146	15.5	8.68	High	High	High	High	High	High	High	High		0	22.714	99.57	7
High	Master Protein	G7IT86	Phosphoglycerate kinase OS=Medicago truncatula GN=MTR_2g066120 PE=3 SV=1	0	111.541	61.3466	22	50	16	1	401	42.4	6.01	High	High	High	High	High	High	High	Not Found		0	4.623	171.12	22
High	Master Protein	G7ZWL8	GroES chaperonin OS=Medicago truncatula GN=MTR_3g110030 PE=2 SV=1	0	25.315	60.8247	6	9	6	1	97	10.6	8.46	High	Not Found	High	High	High	High	Not Found	Not Found		0	4.995	28.98	6
High	Master Protein	G7ISD9	Auxin-repressed/dormancy-associated protein OS=Medicago truncatula GN=MTR_2g014240 PE=4 SV=1	0	33.439	60.7143	6	7	6	1	112	12.4	9.57	High	High	High	High	High	Not Found	Not Found	Not Found		0	3.642	30.91	6
High	Master Protein	B7FNA2	EF hand calcium-binding family protein OS=Medicago truncatula GN=MTR_5g011850 PE=2 SV=1	0	31.895	60.5442	9	17	9	1	147	16.6	4.81	High	High	High	High	High	High	Not Found	Not Found		0	6.943	62.78	9
High	Master Protein	A0A072TYG3	Processing peptidase OS=Medicago truncatula GN=MTR_7g053330 PE=3 SV=1	0	250.843	60.5263	33	128	32	1	532	59.6	6.93	High	High	High	High	High	High	High	High	Deamidated [R108]	0	18.475	514.71	33
High	Master Protein	I3T0H2	ATP synthase CF0 C subunit OS=Medicago truncatula GN=atpH PE=2 SV=1	0	16.296	60.4938	2	2	2	1	81	8	4.44	High	Not Found	Not Found	Not Found	Not Found	Not Found	Not Found	High		0	2.162	15.08	2
High	Master Protein	G7K2D0	Photosystem I reaction center subunit II OS=Medicago truncatula GN=MTR_5g006130 PE=2 SV=1	0	172.81	59.8086	17	71	11	1	209	23	9.57	High	High	High	High	High	Not Found	Not Found	High	Deamidated [Q152; R155; Q163]; Carboxymethyl [K58; K168]	0	202.092	342.14	17
High	Master Protein	G7KEN2	Chlorophyll a-b binding protein, chloroplastic OS=Medicago truncatula GN=MTR_5g097280 PE=3 SV=1	0	177.618	59.6226	14	181	8	1	265	28.7	5.44	High	High	High	High	High	Medium	High	High	Deamidated [R95; Q230; Q240; Q265]	0	241.446	787.88	14
High	Master Protein	G7INT9	Chlorophyll a-b binding protein, chloroplastic OS=Medicago truncatula GN=MTR_2g008610 PE=3 SV=1	0	162.23	59.387	16	89	16	1	261	27.7	6.6	High	High	High	High	High	High	High	High	Deamidated [Q195; R226]; Carboxymethyl [K201]; Phospho [T184; T211]	2	62.096	369	16
High	Master Protein	B7FIH3	Actin-97 OS=Medicago truncatula GN=MTR_0015s0130 PE=2 SV=1	0	120.256	59.1512	22	82	3	1	377	41.6	5.49	Not Found	Not Found	Not Found	Not Found	High	High	Not Found	Not Found	Deamidated [R97]	0	13.251	295.96	22
High	Master Protein	A0A072W1H5	ATP synthase subunit beta OS=Medicago truncatula GN=MTR_1g108765 PE=3 SV=1	0	259.679	58.6762	30	163	7	1	559	59.9	6.15	High	High	High	High	High	High	Not Found	Not Found	Deamidated [R163; Q446; R449; Q453; Q456; Q462; Q516]; Carboxymethyl [K546]	0	19.691	661.66	30
High	Master Protein	I3SPL5	40S ribosomal protein S17 OS=Medicago truncatula GN=MTR_1g058250 PE=2 SV=1	0	40.547	58.3333	7	19	7	1	144	16.2	10.23	High	High	High	High	High	High	High	Not Found		0	11.915	72.85	7
High	Master Protein	I3SSW0	Plastid lipid-associated protein OS=Medicago truncatula GN=MTR_1g054070 PE=2 SV=1	0	74.993	57.9125	14	21	14	1	297	32.4	5.82	High	High	High	High	High	High	High	Not Found		0	4.78	93.51	14
High	Master Protein	Q1STQ6	NADH dehydrogenase [ubiquinone] 1 alpha subcomplex subunit 1 OS=Medicago truncatula GN=MTR_8g005360 PE=2 SV=1	0	8.435	57.8125	4	15	4	1	64	7.2	8.24	High	High	High	High	High	High	Not Found	Not Found		0	9	38.61	4
High	Master Protein	G7IL85	Actin-related protein 4A OS=Medicago truncatula GN=MTR_2g008050 PE=3 SV=1	0	130.481	57.0292	20	89	4	1	377	41.6	5.49	Not Found	Not Found	Not Found	High	High	High	High	Not Found	Deamidated [R97]	0	14.571	331.05	20
High	Master Protein	A0A072V9Z1	Peroxisomal (S)-2-hydroxy-acid oxidase GLO1 OS=Medicago truncatula GN=MTR_2g070420 PE=3 SV=1	0	87.617	56.4516	19	54	19	1	372	40.8	9.13	High	High	High	High	High	High	High	Not Found	Phospho [T5]	1	8.152	160.26	19
High	Master Protein	G7JIU9	Transmembrane protein, putative OS=Medicago truncatula GN=MTR_4g100770 PE=4 SV=1	0	9.145	56.1404	4	8	4	1	57	6.4	10.27	Not Found	High	High	High	High	High	Not Found	Not Found		0	9	22.51	4
High	Master Protein	G7ZVI4	Photosystem II oxygen-evolving enhancer protein OS=Medicago truncatula GN=MTR_8g078870 PE=4 SV=1	0	240.189	55.9271	18	110	8	1	329	35	6.62	High	High	High	High	High	Not Found	Not Found	Not Found	Deamidated [Q94; Q155; R260]	0	29.079	541.59	18
High	Master Protein	G7JRI5	L-ascorbate peroxidase OS=Medicago truncatula GN=MTR_4g061140 PE=2 SV=1	0	87.822	55.6	12	49	11	1	250	27.1	5.81	High	High	High	High	High	High	Not Found	Not Found		0	7.66	207.78	12
High	Master Protein	A0A072UQU8	ATP-dependent zinc metalloprotease FTSH protein OS=Medicago truncatula GN=MTR_4g094662 PE=3 SV=1	0	280.557	55.3314	41	200	18	1	694	74.5	5.57	High	High	High	High	High	High	High	High	Deamidated [Q396; R454; R455]; Phospho [S398]	1	28.182	779.54	41
High	Master Protein	G7IR60	Chlorophyll a-b binding protein, chloroplastic OS=Medicago truncatula GN=MTR_2g081090 PE=3 SV=1	0	80.287	55.303	10	73	9	1	264	28.5	5.64	High	High	High	High	High	High	Medium	Not Found	Deamidated [Q191; Q229]	0	19.309	269.32	10
High	Master Protein	A0A072URM9	Archaeal/vacuolar-type H+-ATPase subunit A OS=Medicago truncatula GN=MTR_4g005410 PE=3 SV=1	0	271.519	55.2885	40	113	40	1	624	68.7	5.34	High	High	High	High	High	High	High	High	Deamidated [R617]	0	13.925	452.53	40
High	Master Protein	A0A072VRS4	RAB GTPase-like protein A5B OS=Medicago truncatula GN=MTR_1g115325 PE=4 SV=1	0	56.906	54.8837	10	34	3	1	215	23.8	7.83	Not Found	High	High	High	Not Found	High	Not Found	High		0	4.817	110.73	10
High	Master Protein	G7JML2	Glyceraldehyde-3-phosphate dehydrogenase OS=Medicago truncatula GN=MTR_4g103920 PE=3 SV=1	0	101.534	54.8673	17	44	10	1	339	36.6	7.05	High	High	High	High	High	Not Found	Not Found	High		0	8.047	162.86	17
High	Master Protein	G7J4K7	TPR domain protein OS=Medicago truncatula GN=MTR_3g100100 PE=4 SV=1	0	158.628	54.2601	11	45	11	1	223	24.5	8.85	High	High	High	High	High	High	High	Not Found	Phospho [S172]	1	25.827	263.58	11
High	Master Protein	A0A072U9H4	Chlorophyll a-b binding protein, chloroplastic OS=Medicago truncatula GN=MTR_6g060175 PE=3 SV=1	0	190.379	53.9792	16	144	16	1	289	31	6	High	High	High	High	High	High	High	High	Deamidated [Q120; Q226; Q251; R285]; Phospho [T62; S65]; Carboxymethyl [K70]	2	53.556	591.45	16
High	Master Protein	A0A072VL01	Succinate-CoA ligase subunit beta OS=Medicago truncatula GN=MTR_1g069645 PE=3 SV=1	0	108.113	53.9192	21	50	21	1	421	45.1	5.91	High	High	High	High	High	High	High	High		0	5.579	193.13	21
High	Master Protein	G7L520	Ribulose bisphosphate carboxylase large chain domain protein OS=Medicago truncatula GN=MTR_7g117930 PE=3 SV=1	0	219.188	53.6842	38	194	18	1	475	52.6	6.7	High	High	High	High	High	High	Not Found	High	Deamidated [Q149]; Carboxymethyl [K175]	0	84.317	719.6	38
High	Master Protein	G7KMR3	Ribulose bisphosphate carboxylase small chain OS=Medicago truncatula GN=MTR_6g018300 PE=3 SV=1	0	88.371	53.6723	13	52	2	1	177	19.8	8.54	High	High	High	High	High	Not Found	Not Found	Not Found		0	25.827	188.24	13
High	Master Protein	G7KZJ5	Photosystem I reaction center subunit IV A OS=Medicago truncatula GN=MTR_7g099390 PE=2 SV=1	0	75.793	53.6232	6	31	5	1	138	15	9.5	High	High	High	High	High	High	High	High	Carboxymethyl [K71]; Deamidated [Q104]	0	99	116.94	6
High	Master Protein	A0A072VSL4	Archaeal/vacuolar-type H+-ATPase subunit B OS=Medicago truncatula GN=MTR_1g112870 PE=3 SV=1	0	145.948	53.3742	23	84	4	1	489	54.1	5.1	High	High	High	High	High	High	High	Not Found	Deamidated [Q5; R137]; Carboxymethyl [K111]	0	9.746	349.18	23
High	Master Protein	G7J9M6	60S ribosomal protein L6 OS=Medicago truncatula GN=MTR_3g093110 PE=2 SV=1	0	48.97	53.3679	10	17	10	1	193	21.7	9.28	High	High	High	High	High	High	High	Not Found		0	7.483	65.71	10
High	Master Protein	G7I348	Copper chaperone OS=Medicago truncatula GN=MTR_1g092670 PE=2 SV=1	0	18.995	53.1646	3	5	3	1	79	8.4	6.61	Not Found	Not Found	Not Found	Not Found	High	High	High	Not Found		0	5.31	20.58	3
High	Master Protein	A0A072VRS6	D-glycerate dehydrogenase/hydroxypyruvate reductase OS=Medicago truncatula GN=MTR_1g112510 PE=3 SV=1	0	148.735	53.1088	20	69	20	1	386	42.2	7.42	High	High	High	High	High	High	High	High		0	12.043	294.79	20
High	Master Protein	G7KGT1	Ribulose bisphosphate carboxylase/oxygenase activase OS=Medicago truncatula GN=MTR_5g080450 PE=4 SV=1	0	197.064	52.9412	32	121	6	1	476	52.3	6.46	High	High	High	High	High	High	Not Found	Not Found	Deamidated [Q266; Q403; Q405]	0	21.539	457.3	32
High	Master Protein	B7FHB2	Ribulose bisphosphate carboxylase small chain OS=Medicago truncatula GN=MTR_6g018310 PE=2 SV=1	0	81.184	52.7778	13	51	2	1	180	20	8.54	Not Found	High	High	High	High	Not Found	Not Found	Not Found		0	25.827	173.17	13
High	Master Protein	A0A072VQL5	Cytochrome b5-like heme/steroid-binding domain protein OS=Medicago truncatula GN=MTR_1g100727 PE=3 SV=1	0	60.825	52.7273	9	29	6	1	220	24.2	4.61	High	High	High	High	High	High	Not Found	High	Deamidated [Q98]	0	11.328	100.57	9
High	Master Protein	B7FMX5	NADH dehydrogenase [ubiquinone] 1 alpha subcomplex subunit 6 OS=Medicago truncatula GN=MTR_8g040150 PE=2 SV=1	0	27.659	52.6316	8	16	8	1	133	15.2	9.5	High	High	High	High	High	High	Not Found	Not Found		0	4.623	49.93	8
High	Master Protein	G7K9H5	Photosystem II oxygen-evolving enhancer protein OS=Medicago truncatula GN=MTR_5g018670 PE=4 SV=1	0	139.234	52.5836	14	83	4	1	329	34.9	6.39	Not Found	High	High	High	High	Not Found	Not Found	Not Found	Deamidated [Q94; R260]; Carboxymethyl [K219]	0	10.007	370.99	14
High	Master Protein	A0A072TWG1	Ribulose bisphosphate carboxylase small chain OS=Medicago truncatula GN=MTR_7g007120 PE=3 SV=1	0	74.303	52.4862	13	47	6	1	181	20.2	8.54	High	High	High	High	High	Not Found	Not Found	Not Found		0	40.246	157.13	13
High	Master Protein	G7LCJ4	F0F1-type ATP synthase, epsilon subunit OS=Medicago truncatula GN=MTR_8g008870 PE=3 SV=1	0	57.21	52.2843	9	26	9	1	197	21	6.32	High	High	High	High	High	High	Not Found	Not Found		0	13.251	92.36	9
High	Master Protein	Q71JC6	Calmodulin 1 OS=Medicago truncatula GN=MTR_6g025320 PE=2 SV=1	0	90.17	51.6779	8	37	8	1	149	16.8	4.27	High	High	High	High	High	High	High	Not Found	Phospho [T6]; Deamidated [Q97]	1	17.738	187	8
High	Master Protein	G7K2H2	ADP-ribosylation factor-like protein A1D OS=Medicago truncatula GN=MTR_5g015370 PE=2 SV=1	0	61.113	51.6304	6	22	4	1	184	20.5	8.43	High	High	High	High	High	High	Not Found	Not Found	Deamidated [Q28]	0	7.254	96.31	6
High	Master Protein	P93333	Class-10 pathogenesis-related protein 1 OS=Medicago truncatula GN=PR10-1 PE=2 SV=1	0	59.271	51.5924	6	11	6	1	157	16.6	4.73	High	Not Found	High	High	High	Not Found	Not Found	Not Found		0	4.012	61.96	6
High	Master Protein	G7JRA2	Tubulin beta chain OS=Medicago truncatula GN=MTR_4g019110 PE=2 SV=1	0	133.401	51.4477	19	73	6	1	449	50.5	4.83	High	High	High	High	High	High	High	Not Found	Deamidated [R58]	0	8.284	273.46	19
High	Master Protein	G7IAW2	ATP synthase subunit beta OS=Medicago truncatula GN=MTR_1g108770 PE=3 SV=2	0	167.548	51.3417	25	113	2	1	559	60	6.02	Not Found	Not Found	Not Found	Not Found	High	Not Found	Not Found	Not Found	Deamidated [R166; Q204; Q208; Q209; Q456; Q459; Q465]; Carboxymethyl [K549]	0	7.449	383.35	25
High	Master Protein	I3SXG8	Photosystem I reaction center subunit IV A OS=Medicago truncatula GN=MTR_1g069235 PE=2 SV=1	0	24.868	50.6757	5	28	4	1	148	15.5	9.82	High	High	High	High	High	High	High	Not Found		0	6.197	112.3	5
High	Master Protein	A2Q5T7	H+-transporting two-sector ATPase, C (AC39) subunit OS=Medicago truncatula GN=MTR_7g009590 PE=4 SV=1	0	104.542	50.4274	16	48	16	1	351	40.7	5.06	High	High	High	High	High	High	High	Not Found		0	11.328	203.88	16
High	Master Protein	G7J588	Tubulin beta chain OS=Medicago truncatula GN=MTR_3g113970 PE=2 SV=1	0	117.659	50.2222	18	69	7	1	450	50.6	4.87	High	High	High	High	High	High	High	High	Deamidated [R60; Q96]	0	6.943	253.27	18
High	Master Protein	B7FJY9	Chlorophyll a-b binding protein, chloroplastic OS=Medicago truncatula GN=MTR_3g435460 PE=2 SV=1	0	116.265	50.1976	10	42	10	1	253	27.7	6.93	High	High	High	High	High	High	Not Found	Not Found	Deamidated [Q93; R100]	0	14.399	197.51	10
High	Master Protein	G7IBL3	Syntaxin of plants protein OS=Medicago truncatula GN=MTR_1g066460 PE=3 SV=1	0	79.817	50.1887	12	42	12	1	265	29.9	5.4	High	High	High	High	High	High	High	High	Deamidated [Q25]	0	6.848	149.52	12
High	Master Protein	G7J8Y6	60S acidic ribosomal protein OS=Medicago truncatula GN=MTR_3g092600 PE=2 SV=1	0	22.198	50	2	3	2	1	110	11.1	4.36	High	High	Not Found	High	Not Found	Not Found	Not Found	Not Found		0	1.154	20.44	2
High	Master Protein	G7KEZ8	Gamma carbonic anhydrase-like protein OS=Medicago truncatula GN=MTR_5g020850 PE=4 SV=1	0	106.502	50	11	43	10	1	270	29.2	6.54	High	High	High	High	High	High	High	Not Found		0	9	252.12	11
High	Master Protein	G7IPY3	Ribosomal protein S11 OS=Medicago truncatula GN=MTR_2g019670 PE=2 SV=2	0	29.789	49.6689	7	19	7	1	151	16.3	10.59	High	High	High	High	High	High	High	High		0	9	64.29	7
High	Master Protein	I3S1P8	Porin/voltage-dependent anion-selective channel protein OS=Medicago truncatula GN=MTR_6g011390 PE=2 SV=1	0	65.909	49.6403	11	21	10	1	278	30	9.03	High	High	High	High	Not Found	High	High	Not Found		0	3.642	75.9	11
High	Master Protein	G7JZW9	Glycine cleavage system H protein OS=Medicago truncatula GN=MTR_5g014260 PE=2 SV=1	0	55.583	49.3976	5	25	5	1	166	17.8	5.19	High	High	High	High	High	Not Found	Not Found	Not Found		0	4.337	112.32	5
High	Master Protein	I3SSE5	Oxygen-evolving enhancer protein OS=Medicago truncatula GN=MTR_8g005175 PE=2 SV=1	0	73.956	49.1379	12	34	12	1	232	24.9	9.66	High	High	High	High	High	High	Medium	High		0	10.788	130.12	12
High	Master Protein	A0A072VJR8	60S ribosomal L4-like protein OS=Medicago truncatula GN=MTR_1g066990 PE=4 SV=1	0	117.474	49.1358	19	52	8	1	405	44.6	10.37	High	High	High	High	High	High	Not Found	Not Found	Deamidated [Q304; R308]	0	9	202.81	19
High	Master Protein	G7JTQ1	RAB GTPase-like protein A5B OS=Medicago truncatula GN=MTR_4g063160 PE=4 SV=1	0	53.214	49.0741	9	30	1	1	216	23.9	7.11	Not Found	Not Found	Not Found	High	High	Not Found	Not Found	Not Found		0	3.642	95.61	9
High	Master Protein	B7FGS0	60S ribosomal protein L13 OS=Medicago truncatula GN=MTR_1g022165 PE=2 SV=1	0	59.31	48.7923	11	24	4	1	207	23.9	10.93	Not Found	High	High	High	Not Found	High	High	Not Found		0	13.678	76.55	11
High	Master Protein	G7L638	Ubiquinol-cytochrome C reductase OS=Medicago truncatula GN=MTR_7g104570 PE=2 SV=1	0	9.091	48.6111	4	7	4	1	72	8.1	9.19	High	Not Found	High	High	Not Found	High	Not Found	Not Found		0	9	16.86	4
High	Master Protein	I3SG71	Thylakoid soluble phosphoprotein TSP9 protein OS=Medicago truncatula GN=MTR_3g462990 PE=2 SV=1	0	24.209	48.4211	7	17	7	1	95	10.3	9.85	High	High	High	High	High	High	Not Found	High		0	9	51.9	7
High	Master Protein	B7FJX5	60S ribosomal protein L5-2 OS=Medicago truncatula GN=MTR_8g028125 PE=2 SV=1	0	164.323	48.3444	20	81	8	1	302	34.5	9.04	High	High	High	High	High	High	High	Not Found		0	58.948	335.25	20
High	Master Protein	G7K6T2	60S ribosomal protein L13 OS=Medicago truncatula GN=MTR_5g026750 PE=2 SV=2	0	49.38	48.3092	9	21	2	1	207	23.9	10.84	High	High	High	High	Not Found	Not Found	Not Found	Not Found		0	7.111	73.94	9
High	Master Protein	G7KKH1	Chlorophyll a-b binding protein, chloroplastic OS=Medicago truncatula GN=MTR_6g012110 PE=3 SV=1	0	121.433	48.3019	12	156	2	1	265	28.3	6.35	High	High	High	High	High	High	Not Found	Not Found	Deamidated [R95; Q230]; Phospho [T42]	1	67.129	551.36	12
High	Master Protein	A0A072V7S2	ATP-dependent zinc metalloprotease FTSH protein OS=Medicago truncatula GN=MTR_2g438140 PE=3 SV=1	0	200.924	48.2609	35	138	13	1	690	74.1	6.44	High	High	High	High	High	High	High	Medium	Deamidated [R451; R452]	0	16.013	516.76	35
High	Master Protein	G7JPK2	Peptidyl-prolyl cis-trans isomerase OS=Medicago truncatula GN=MTR_4g075290 PE=2 SV=1	0	51.19	48.2558	9	22	6	1	172	18.2	8.18	High	High	High	High	High	Not Found	Not Found	High	Carboxymethyl [K125]	0	2.981	84.86	9
High	Master Protein	G7JT26	Extracellular calcium sensing receptor OS=Medicago truncatula GN=MTR_4g112530 PE=4 SV=2	0	134.789	48.2143	16	72	16	1	392	41.6	9.51	High	High	High	High	High	High	High	High	Deamidated [Q144; Q162]	0	10.007	325.74	16
High	Master Protein	A0A072VNE4	Peptidyl-prolyl cis-trans isomerase OS=Medicago truncatula GN=MTR_1g085560 PE=3 SV=1	0	70.265	48.2072	10	35	10	1	251	26.6	8.24	High	High	High	High	High	High	Not Found	Not Found	Deamidated [Q144; Q226]	0	7.799	138.83	10
High	Master Protein	A0A072TQ67	Malate dehydrogenase OS=Medicago truncatula GN=MTR_8g463760 PE=3 SV=1	0	99.375	48.105	13	32	11	1	343	35.8	8.47	High	High	High	High	High	High	High	High		0	4.78	134.47	13
High	Master Protein	G7IV48	26S protease regulatory subunit 6B OS=Medicago truncatula GN=MTR_3g062510 PE=3 SV=1	0	88.626	47.9518	15	27	14	1	415	46.4	5.59	High	High	High	High	High	High	High	High	Deamidated [R111]	0	4.754	94.69	15
High	Master Protein	G7ITL8	Quinone oxidoreductase OS=Medicago truncatula GN=MTR_2g081810 PE=2 SV=1	0	54.912	47.7833	11	29	8	1	203	21.7	6.19	High	High	High	High	High	High	High	Medium		0	16.783	96.56	11
High	Master Protein	Q1SKX2	70 kDa heat shock protein OS=Medicago truncatula GN=MTR_2g005690 PE=3 SV=1	0	182.051	47.5248	28	88	27	1	707	75.7	5.34	High	High	High	High	High	High	High	Not Found	Deamidated [R576; Q600]	0	7.547	340.56	28
High	Master Protein	S4T0X8	ATP synthase subunit alpha OS=Medicago truncatula GN=atpA PE=3 SV=1	0	267.887	47.3581	31	284	10	1	511	55.8	5.41	High	High	High	High	High	High	High	High	Deamidated [Q34; Q97; R119; Q148; Q208; Q214; R216; R297; Q504; Q506]; Phospho [T29; T92]	2	160.026	1082.73	31
High	Master Protein	G7I999	Complex I subunit OS=Medicago truncatula GN=MTR_1g059290 PE=2 SV=1	0	16.864	47.3214	4	6	3	1	112	12.4	5.5	Not Found	Medium	High	High	High	High	Not Found	Not Found		0	3.642	25.77	4
High	Master Protein	B5BLW2	Carotenoid cleavage dioxygenase OS=Medicago truncatula GN=ccd1 PE=2 SV=1	0	123.106	47.2222	21	58	21	1	540	60.9	6.79	High	High	High	High	High	High	High	Medium		0	4.456	229.27	21
High	Master Protein	G7JB75	Chlorophyll a-b binding protein, chloroplastic OS=Medicago truncatula GN=MTR_3g070340 PE=3 SV=1	0	178.474	47.1223	13	99	12	1	278	30.7	6.01	High	High	High	High	High	High	Not Found	Medium	Deamidated [Q127; Q136; R137; R239]; Carboxymethyl [K237]; Phospho [T114; S118; T119; T124]	4	65.608	434.48	13
High	Master Protein	A0A072UQY6	Complex I subunit OS=Medicago truncatula GN=MTR_4g094792 PE=4 SV=1	0	26.109	47.0588	6	16	6	1	85	9.6	9.52	High	High	High	High	Medium	High	High	Not Found	Deamidated [Q48]	0	45.416	51.24	6
High	Master Protein	A0A072VDB9	Gamma carbonic anhydrase-like protein OS=Medicago truncatula GN=MTR_3g112020 PE=4 SV=1	0	100.016	47.0588	11	41	9	1	272	29.3	6.81	High	High	High	High	High	High	High	Not Found		0	4.275	200.49	11
High	Master Protein	G7KSI7	Archaeal/vacuolar-type H+-ATPase subunit B OS=Medicago truncatula GN=MTR_7g081010 PE=3 SV=1	0	130.94	47.0226	20	73	1	1	487	54.1	5.15	Not Found	Not Found	Not Found	Not Found	Not Found	Not Found	High	Not Found	Deamidated [R136]; Carboxymethyl [K110]	0	6.499	307.06	20
High	Master Protein	B7FMK2	Archaeal/vacuolar-type H+-ATPase subunit E OS=Medicago truncatula GN=MTR_5g009720 PE=2 SV=1	0	44.553	46.9565	12	32	12	1	230	26.4	7.02	High	High	High	High	High	High	High	High		0	5.494	108.95	12
High	Master Protein	A0A072VA70	Caffeic acid O-methyltransferase OS=Medicago truncatula GN=MTR_2g072790 PE=3 SV=1	0	159.97	46.8927	16	61	16	1	354	39.3	6.4	High	High	High	High	High	High	High	Not Found	Deamidated [Q118]	0	15.496	247.99	16
High	Master Protein	A0A072V376	ATP-dependent zinc metalloprotease FTSH protein OS=Medicago truncatula GN=MTR_3g115110 PE=3 SV=1	0	268.215	46.7422	37	177	36	1	706	75.6	5.85	High	High	High	High	High	High	High	High	Deamidated [Q153; R399; Q541; Q585]	0	33.402	674.37	37
High	Master Protein	B7FIZ2	NADH-ubiquinone oxidoreductase 39 kDa subunit OS=Medicago truncatula GN=MTR_1g069455 PE=2 SV=1	0	112.306	46.7172	15	57	15	1	396	43.8	9.33	High	High	High	High	High	High	High	Not Found		0	5.494	199.7	15
High	Master Protein	A0A072U6I0	SPFH/band 7/PHB domain membrane-associated family protein OS=Medicago truncatula GN=MTR_6g011380 PE=4 SV=1	0	96.747	46.5035	14	67	10	1	286	31.3	5.43	High	High	High	High	High	High	Medium	Medium		0	10.22	225.2	14
High	Master Protein	I3SV27	Transmembrane protein, putative OS=Medicago truncatula GN=MTR_7g094710 PE=2 SV=1	0	10.828	46.4789	2	5	2	1	71	7.2	4.42	Not Found	Not Found	Not Found	Not Found	Not Found	High	High	Not Found		0	30.623	30.43	2
High	Master Protein	B7FH09	DREPP plasma membrane protein OS=Medicago truncatula GN=MTR_2g437530 PE=2 SV=1	0	32.059	46.2617	9	16	9	1	214	23.8	4.92	High	High	High	High	High	High	High	High		0	1.976	58.35	9
High	Master Protein	S4SZZ8	Cytochrome f OS=Medicago truncatula GN=petA PE=3 SV=1	0	115.844	46.25	15	49	15	1	320	35.3	8.56	High	High	High	High	High	High	High	Not Found		0	13.125	191.91	15
High	Master Protein	G7IEC9	RAN GTPase activating protein OS=Medicago truncatula GN=MTR_1g072250 PE=4 SV=1	0	111.24	46.1538	21	46	21	1	533	57.8	4.65	High	High	High	High	High	High	High	Not Found		0	5.978	154.86	21
High	Master Protein	B7FHQ5	Superoxide dismutase [Cu-Zn] OS=Medicago truncatula GN=MTR_4g057240 PE=2 SV=1	0	59.84	46.1165	5	9	5	1	206	21.2	6.58	Not Found	Not Found	High	High	High	High	High	Not Found	Deamidated [Q155]	0	3.642	48.74	5
High	Master Protein	A0A072UHB9	Cytochrome b5-like heme/steroid-binding domain protein OS=Medicago truncatula GN=MTR_4g022350 PE=3 SV=1	0	49.392	45.9459	6	22	6	1	148	16.6	5.15	High	High	High	High	High	High	High	Not Found		0	4.337	103.15	6
High	Master Protein	I3S7Z5	Peptidyl-prolyl cis-trans isomerase OS=Medicago truncatula GN=MTR_1g117010 PE=2 SV=1	0	48.519	45.9016	11	36	11	1	244	26.2	9.63	High	High	High	High	High	High	High	High	Carboxymethyl [K194]	0	4.995	136.91	11
High	Master Protein	G7IUL4	60S ribosomal L28-like protein OS=Medicago truncatula GN=MTR_2g100410 PE=4 SV=1	0	36.53	45.8904	7	16	5	1	146	16.4	10.9	Not Found	High	High	High	High	High	Not Found	Not Found		0	6.943	63.72	7
High	Master Protein	G7J4Y2	Thylakoid-bound ascorbate peroxidase OS=Medicago truncatula GN=MTR_3g088160 PE=3 SV=1	0	157.795	45.8716	19	85	19	1	436	47.4	8.95	High	High	High	High	High	High	High	Medium	Deamidated [R260]	0	7.577	337.94	19
High	Master Protein	G7I8P7	26S proteasome regulatory particle triple-A ATPase protein OS=Medicago truncatula GN=MTR_1g083330 PE=3 SV=1	0	111.264	45.8629	18	29	17	1	423	47.4	5.11	Not Found	Not Found	High	High	High	High	High	Not Found		0	3.894	120.84	18
High	Master Protein	A2Q5A0	Photosystem II protein D1 OS=Medicago truncatula GN=MTR_7g021750 PE=3 SV=1	0	169.483	45.6091	17	192	17	1	353	39	5.25	High	High	High	High	High	High	High	High	Deamidated [Q187; R269; Q304; Q310; R312; R323]; Phospho [S305]	1	149.131	644.84	17
High	Master Protein	G7I7L8	ER membrane protein complex subunit-like protein OS=Medicago truncatula GN=MTR_1g013660 PE=4 SV=1	0	32.616	45.5056	6	18	6	1	178	19.6	8.37	High	High	High	High	High	High	Not Found	High	Deamidated [Q41]	0	4.012	46.85	6
High	Master Protein	A0A072V2R0	Dihydrolipoyl dehydrogenase OS=Medicago truncatula GN=MTR_4g123070 PE=4 SV=1	0	133.308	45.4183	21	55	21	1	502	53.2	7.36	High	High	High	High	High	High	High	Not Found		0	5.661	203.41	21
High	Master Protein	G7KAG6	Cytochrome C oxidase, subunit VIb family protein OS=Medicago truncatula GN=MTR_5g064600 PE=2 SV=1	0	55.564	45.3552	9	23	8	1	183	20.6	4.46	High	High	High	Medium	High	High	High	Not Found	Phospho [S7; S8; T10]	3	20.544	72.68	9
High	Master Protein	I3SI55	Light harvesting-like protein OS=Medicago truncatula GN=MTR_4g099340 PE=2 SV=1	0	100.286	45.3488	10	50	10	1	258	28.8	6.54	High	High	High	High	High	High	High	Not Found	Deamidated [R132; R133; R177]; Carboxymethyl [K71]	0	28.286	185.97	10
High	Master Protein	S4T074	Photosystem II CP47 reaction center protein OS=Medicago truncatula GN=psbB PE=3 SV=1	0	272.557	45.2756	27	218	17	1	508	56	6.77	High	High	High	High	High	High	Not Found	High	Deamidated [R18; R272; Q274; Q281; Q282; Q296; R347]; Phospho [S36]	1	200.534	774.23	27
High	Master Protein	B7FJ16	Oxygen-evolving enhancer protein 2-1 OS=Medicago truncatula GN=MTR_3g449930 PE=2 SV=1	0	81.046	44.8276	11	39	11	1	261	28.1	7.84	High	High	High	High	High	High	High	Not Found		0	5.661	174.9	11
High	Master Protein	A0A072UX22	NAD-dependent epimerase/dehydratase family protein OS=Medicago truncatula GN=MTR_4g068970 PE=4 SV=1	0	280.58	44.7738	19	93	19	1	641	68	5.67	High	High	High	High	High	High	High	Not Found	Deamidated [Q506]	0	10.548	565.2	19
High	Master Protein	G7JJ96	Aminomethyltransferase OS=Medicago truncatula GN=MTR_4g132360 PE=3 SV=1	0	137.171	44.5727	16	49	16	1	433	47.3	9.06	High	High	High	High	High	High	Not Found	Not Found		0	6.814	209.65	16
High	Master Protein	G7KN61	Elongation factor 1-alpha OS=Medicago truncatula GN=MTR_6g021800 PE=3 SV=2	0	124.389	44.519	22	91	8	1	447	49.2	9.07	High	High	High	High	High	High	High	Not Found	Deamidated [Q331]; Carboxymethyl [K359]	0	10.602	314.11	22
High	Master Protein	G7JNF4	Calcium-dependent lipid-binding (CaLB domain) family protein OS=Medicago truncatula GN=MTR_4g073400 PE=4 SV=1	0	151.327	44.5065	28	98	26	1	537	61.3	6.77	High	High	High	High	High	High	High	High		0	9	351.48	28
High	Master Protein	G7LJD9	Protein transporter Sec61 subunit beta-like protein OS=Medicago truncatula GN=MTR_8g086330 PE=4 SV=1	0	5.552	44.4444	3	7	1	1	81	8.2	10.61	Not Found	Not Found	Not Found	Not Found	High	Not Found	Medium	High		0	2.162	19.79	3
High	Master Protein	G7KXT9	Heat shock cognate 70 kDa protein OS=Medicago truncatula GN=MTR_7g024580 PE=3 SV=1	0	193.528	44.376	27	95	5	1	649	71	5.19	High	High	High	High	High	High	High	Not Found		0	7.338	385.36	27
High	Master Protein	G7J8I5	Heavy metal transport/detoxification superfamily protein OS=Medicago truncatula GN=MTR_3g117890 PE=4 SV=1	0	27.744	44.2308	5	9	5	1	156	17.5	8.85	Not Found	High	Medium	High	High	High	Not Found	Not Found		0	2.162	30.72	5
High	Master Protein	Q2HT97	Heat shock cognate 70 kDa protein OS=Medicago truncatula GN=MTR_7g099680 PE=3 SV=1	0	200.54	44.2219	32	94	14	1	649	71	5.22	High	High	High	High	High	High	High	High		0	10.994	387.6	32
High	Master Protein	G7I4F8	Succinate dehydrogenase OS=Medicago truncatula GN=MTR_1g019810 PE=4 SV=2	0	91.552	44.1176	7	23	7	1	238	26.2	6.3	Not Found	High	High	High	High	High	High	Not Found		0	4.623	120.06	7
High	Master Protein	G7JAI2	ATP synthase, F0 subunit B OS=Medicago truncatula GN=MTR_3g106820 PE=2 SV=1	0	177.92	44.0191	11	166	11	1	209	23	5.8	High	High	High	High	High	High	High	High	Deamidated [Q129; R135; Q147; Q172; Q192; Q198]; Carboxymethyl [K124; K180]; Phospho [S191]	1	241.446	729.29	11
High	Master Protein	G7JAB0	Pathogenic type III effector avirulence factor Avr AvrRpt-cleavage: cleavage site protein OS=Medicago truncatula GN=MTR_3g094970 PE=4 SV=1	0	21.806	44	3	4	3	1	100	11.7	9.1	High	Not Found	Not Found	Not Found	Not Found	High	High	Not Found		0	2.162	15.01	3
High	Master Protein	A0A072U566	Peptidyl-prolyl cis-trans isomerase OS=Medicago truncatula GN=MTR_6g007607 PE=4 SV=1	0	116.328	43.7363	14	27	14	1	455	50	5.31	Not Found	High	High	High	High	High	Not Found	Not Found		0	3.924	124.7	14
High	Master Protein	A0A072UL44	Heat shock cognate 70 kDa protein OS=Medicago truncatula GN=MTR_4g063710 PE=3 SV=1	0	169.531	43.6055	28	88	5	1	649	71	5.21	High	High	High	High	High	High	High	High		0	7.886	329.66	28
High	Master Protein	G7JPM2	Uro-adherence factor A, putative OS=Medicago truncatula GN=MTR_4g076030 PE=4 SV=1	0	290.767	43.5703	45	60	45	1	1322	149.6	4.75	Not Found	Not Found	Not Found	High	High	High	High	Not Found	Phospho [S51]; Deamidated [R37]	1	2.23	259.99	45
High	Master Protein	G7KWU8	Heat shock cognate 70 kDa protein OS=Medicago truncatula GN=MTR_7g024390 PE=3 SV=1	0	146.936	43.5185	26	71	2	1	648	70.9	5.19	Not Found	Not Found	High	Not Found	Not Found	Not Found	High	Not Found		0	5.615	266.56	26
High	Master Protein	A0A072UJW7	Fructose-bisphosphate aldolase OS=Medicago truncatula GN=MTR_4g057670 PE=3 SV=1	0	70.829	43.5	17	64	17	1	400	43.2	7.3	High	High	High	High	High	High	Not Found	High		0	6.017	198.88	17
High	Master Protein	G7JQ41	Putative plant SNARE-like protein OS=Medicago truncatula GN=MTR_4g123910 PE=4 SV=1	0	71.258	43.4944	12	24	6	1	269	30.1	6.62	Not Found	Not Found	High	High	Not Found	High	High	Not Found		0	6.079	92.89	12
High	Master Protein	A0A072VC55	Syntaxin of plants 122 protein OS=Medicago truncatula GN=MTR_2g088700 PE=4 SV=1	0	91.089	42.9967	9	39	9	1	307	34.6	6.57	High	High	High	High	High	High	High	Not Found	Deamidated [Q17; R20]; Phospho [S8]	1	4.179	178.04	9
High	Master Protein	A0A072TWL0	Nucleoside diphosphate kinase OS=Medicago truncatula GN=MTR_8g007235 PE=3 SV=1	0	27.684	42.953	6	18	6	1	149	16.5	6.8	High	High	High	High	Not Found	High	High	Not Found		0	4.012	61.29	6
High	Master Protein	A0A072VWK2	Photosystem II reaction center Psb28 protein OS=Medicago truncatula GN=MTR_1g069465 PE=3 SV=1	0	46.97	42.8571	6	19	6	1	182	20.5	8.85	High	High	High	High	High	High	High	Not Found	Deamidated [Q178]	0	9	86.57	6
High	Master Protein	A0A072V1G6	Ribulose-phosphate 3-epimerase OS=Medicago truncatula GN=MTR_4g108800 PE=4 SV=1	0	40.641	42.7046	9	12	8	1	281	30	8.16	High	High	High	High	Not Found	Not Found	Medium	Not Found		0	2.162	37.38	9
High	Master Protein	B7FL29	40S ribosomal protein S4 OS=Medicago truncatula GN=MTR_5g018940 PE=2 SV=1	0	37.49	42.6415	12	21	5	1	265	29.9	10.23	Not Found	High	Medium	High	High	Not Found	Not Found	Not Found		0	3.16	54.91	12
High	Master Protein	G7I7R4	Calcium-dependent lipid-binding (CaLB domain) family protein OS=Medicago truncatula GN=MTR_1g025550 PE=4 SV=1	0	126.407	42.6168	24	72	22	1	535	61	7.83	High	High	High	High	High	High	High	High	Deamidated [R511]	0	5.952	249.29	24
High	Master Protein	I3SG23	SPFH/band 7/PHB domain membrane-associated family protein OS=Medicago truncatula GN=MTR_6g460470 PE=2 SV=1	0	67.33	42.4658	16	59	16	1	292	32.4	5.01	High	High	High	High	High	High	High	High	Deamidated [R270]	0	11.589	166.3	16
High	Master Protein	I3SU63	Fructose-bisphosphate aldolase OS=Medicago truncatula GN=MTR_5g069055 PE=2 SV=1	0	81.834	42.4581	11	29	9	1	358	38.2	6.73	High	High	High	High	High	High	Not Found	Not Found		0	6.743	110.29	11
High	Master Protein	Q1RSH4	GroEL-like chaperone, ATPase OS=Medicago truncatula GN=MTR_1g090130 PE=3 SV=1	0	151.496	42.3611	22	51	6	1	576	61.1	6.62	Not Found	High	Not Found	High	High	High	High	Not Found	Deamidated [R187]	0	4.367	225.39	22
High	Master Protein	G7KYC0	Glyceraldehyde-3-phosphate dehydrogenase OS=Medicago truncatula GN=MTR_7g084800 PE=3 SV=1	0	118.904	42.3267	16	41	12	1	404	43	8.27	High	High	High	High	High	High	Not Found	Not Found		0	7.254	163.61	16
High	Master Protein	G7JKW2	MAR-binding filament-like protein, putative OS=Medicago truncatula GN=MTR_4g054960 PE=4 SV=1	0	229.79	42.3177	34	77	34	1	768	86.7	5.48	High	High	High	High	High	High	High	High	Deamidated [R353]	0	6.667	331.11	34
High	Master Protein	G7JYY7	Glutamate-glyoxylate aminotransferase OS=Medicago truncatula GN=MTR_5g033230 PE=4 SV=1	0	71.919	42.2037	16	39	16	1	481	53.7	6.04	High	High	High	High	High	High	High	High	Deamidated [Q282]	0	3.037	124.69	16
High	Master Protein	A0A072UUL3	Beta-amylase OS=Medicago truncatula GN=MTR_4g045667 PE=3 SV=1	0	120.09	42.1371	17	43	16	1	496	56.2	5.35	High	High	High	High	High	High	High	Not Found		0	4.946	194.72	17
High	Master Protein	B7FGM7	Ribosomal protein S25 OS=Medicago truncatula GN=MTR_2g086610 PE=2 SV=1	0	16.719	42.0561	5	11	5	1	107	11.8	10.81	High	High	High	High	High	High	Not Found	Not Found		0	5.813	35.06	5
High	Master Protein	G7IBZ5	ABA/WDS induced protein OS=Medicago truncatula GN=MTR_1g098680 PE=4 SV=1	0	24.691	42.0233	3	6	3	1	257	27.3	5.35	High	High	High	High	Not Found	High	High	Not Found		0	0.54	31.95	3
High	Master Protein	G7IT45	Photosystem II reaction center protein H OS=Medicago truncatula GN=MTR_2g062930 PE=3 SV=1	0	75.481	42.0168	6	127	5	1	119	13.3	5.06	High	High	High	High	High	High	High	High	Phospho [T3; T5]; Deamidated [Q4; R16]; Carboxymethyl [K24; K32]	2	1388.49	457.31	6
High	Master Protein	A0A072V3A8	Catalase OS=Medicago truncatula GN=MTR_3g115370 PE=3 SV=1	0	152.98	41.8699	19	63	19	1	492	56.7	7.3	High	High	High	High	High	High	High	Not Found	Deamidated [R386]	0	9.798	232.53	19
High	Master Protein	G7JGC6	Nodulin-like protein OS=Medicago truncatula GN=MTR_4g082830 PE=4 SV=1	0	20.064	41.844	6	11	3	1	141	14.5	6.61	High	High	Not Found	High	High	High	Not Found	Not Found		0	2.162	31.56	6
High	Master Protein	A0A072USS0	Tubulin beta chain OS=Medicago truncatula GN=MTR_4g017630 PE=3 SV=1	0	120.895	41.6481	16	66	4	1	449	50.5	4.83	Not Found	High	High	High	High	High	Not Found	Not Found		0	6.356	253.25	16
High	Master Protein	G7JG67	RNA-binding (RRM/RBD/RNP motif) family protein OS=Medicago truncatula GN=MTR_4g070080 PE=4 SV=1	0	31.098	41.6149	6	12	6	1	161	15.7	5.6	High	High	High	High	High	Not Found	Not Found	Not Found	Deamidated [Q81]	0	2.455	40.95	6
High	Master Protein	I3SHU4	Glyoxylate/succinic semialdehyde reductase OS=Medicago truncatula GN=MTR_8g028120 PE=2 SV=1	0	73.902	41.5493	10	15	10	1	284	30	6.57	High	High	High	High	High	High	Not Found	Not Found		0	4.08	65.72	10
High	Master Protein	A0A072V8M0	Putative plant SNARE-like protein OS=Medicago truncatula GN=MTR_2g045960 PE=4 SV=1	0	73.919	41.5094	12	28	6	1	265	29.8	7.87	High	High	High	High	Not Found	High	High	High	Deamidated [Q13; Q17]	0	7.859	116.98	12
High	Master Protein	G8A186	60S ribosomal L21-like protein OS=Medicago truncatula GN=MTR_7g107420 PE=2 SV=1	0	51.499	41.4634	9	31	1	1	164	18.7	10.49	Not Found	Not Found	Not Found	Not Found	High	Not Found	Not Found	Not Found		0	7.254	165.28	9
High	Master Protein	I3T8M7	60S ribosomal L21-like protein OS=Medicago truncatula GN=MTR_1g069905 PE=2 SV=1	0	55.436	41.4634	9	32	1	1	164	18.7	10.49	Not Found	Not Found	Not Found	Not Found	High	Not Found	Not Found	Not Found		0	9	168.33	9
High	Master Protein	A0A072UWZ8	Import receptor subunit TOM7-1 OS=Medicago truncatula GN=MTR_3g462060 PE=4 SV=1	0	8.948	41.4286	3	13	3	1	70	7.7	9.92	High	High	High	High	Not Found	High	High	Not Found		0	5.31	37.37	3
High	Master Protein	A0A072V1W7	Calnexin 2 OS=Medicago truncatula GN=MTR_3g098430 PE=3 SV=1	0	182.559	41.3919	22	90	20	1	546	62.2	4.81	High	High	High	High	High	High	High	Not Found		0	12.219	347.6	22
High	Master Protein	G7JLC6	F0F1-type ATP synthase, delta subunit OS=Medicago truncatula GN=MTR_4g103330 PE=3 SV=1	0	93.958	41.3655	9	46	9	1	249	27.2	9.11	High	High	High	High	High	High	Not Found	Not Found		0	7.577	223.95	9
High	Master Protein	A0A072VDE6	26S proteasome regulatory particle triple-A ATPase protein OS=Medicago truncatula GN=MTR_3g112260 PE=3 SV=1	0	88.07	41.3534	15	30	14	1	399	44.7	8.19	High	High	High	High	High	High	High	Not Found	Deamidated [R350]	0	3.894	115.87	15
High	Master Protein	Q2HRW5	Syntaxin of plants protein OS=Medicago truncatula GN=MTR_7g084590 PE=4 SV=1	0	62.646	41.3534	8	16	8	1	266	29.6	6.16	High	High	High	High	High	High	Not Found	Not Found		0	6.197	74.82	8
High	Master Protein	A0A072TUS4	Heat shock 70 kDa protein OS=Medicago truncatula GN=MTR_8g099795 PE=3 SV=1	0	154.444	41.3174	31	60	5	1	668	73.7	5.19	Not Found	Not Found	Not Found	Medium	High	High	High	Not Found		0	7.859	208.58	31
High	Master Protein	G7JZ43	Cytochrome b5-like heme/steroid-binding domain protein OS=Medicago truncatula GN=MTR_5g045630 PE=3 SV=1	0	45.878	41.2698	3	13	3	1	126	14.2	5.31	Not Found	High	High	High	High	High	High	Not Found	Phospho [S84; S87; T88]	3	9	54.6	3
High	Master Protein	B7FMR1	Elongation factor 1-beta OS=Medicago truncatula GN=MTR_5g088660 PE=2 SV=1	0	52.678	41.2556	9	17	9	1	223	24.2	4.77	Not Found	High	High	High	High	High	High	Not Found		0	5.813	77.26	9
High	Master Protein	G7L0L9	RAB GTPase-like protein A5B OS=Medicago truncatula GN=MTR_7g100020 PE=4 SV=1	0	35.316	41.2037	8	27	1	1	216	23.9	7.83	High	High	High	Not Found	Not Found	Not Found	Not Found	Not Found		0	1.976	78.68	8
High	Master Protein	G7JUD3	Plasma membrane ATPase OS=Medicago truncatula GN=MTR_4g127710 PE=3 SV=1	0	343.415	41.1765	48	210	23	1	952	104.9	6.95	High	High	High	High	High	High	High	High	Deamidated [Q30; R425; Q519]; Phospho [T951]	1	11.368	828.1	48
High	Master Protein	B7FGU7	Cytochrome b6-f complex iron-sulfur subunit OS=Medicago truncatula GN=MTR_2g089510 PE=2 SV=1	0	55.675	41.048	8	34	8	1	229	23.9	7.62	High	High	High	High	High	High	High	High		0	7.483	115.14	8
High	Master Protein	A0A072U545	50S ribosomal protein L7/L12 OS=Medicago truncatula GN=MTR_6g006060 PE=3 SV=1	0	35.508	40.884	7	15	7	1	181	19.1	6.89	High	High	High	High	High	High	Not Found	Not Found		0	4.337	66.24	7
High	Master Protein	G7J8R4	NADH-ubiquinone oxidoreductase 75 kDa subunit OS=Medicago truncatula GN=MTR_3g065130 PE=3 SV=1	0	224.173	40.866	23	97	23	1	739	80.7	7.36	High	High	High	High	High	High	High	Not Found	Deamidated [R298; R416]	0	5.434	458.38	23
High	Master Protein	G7JNF5	L-ascorbate peroxidase OS=Medicago truncatula GN=MTR_4g073410 PE=2 SV=1	0	73.511	40.7666	14	29	14	1	287	31.7	6.74	High	High	High	High	High	High	High	Not Found		0	9	115.44	14
High	Master Protein	G7IBN4	RAB GTPase-like protein A5B OS=Medicago truncatula GN=MTR_1g068730 PE=2 SV=1	0	32.025	40.7407	8	27	2	1	216	23.9	7.11	Not Found	High	High	High	Not Found	Not Found	Not Found	Not Found		0	1.783	83.46	8
High	Master Protein	A9YWS0	Serine hydroxymethyltransferase OS=Medicago truncatula GN=MTR_5g030950 PE=3 SV=1	0	69.02	40.7336	18	44	11	1	518	57.4	8.31	High	High	High	High	High	High	High	Not Found		0	3.146	154.96	18
High	Master Protein	B7FMW0	40S ribosomal protein S8 OS=Medicago truncatula GN=MTR_7g053450 PE=2 SV=1	0	48.899	40.553	8	12	8	1	217	24.7	10.37	High	High	High	High	High	High	High	Not Found		0	5.813	52.47	8
High	Master Protein	A0A072UTX7	Patellin-like protein OS=Medicago truncatula GN=MTR_4g033435 PE=4 SV=1	0	139.8	40.5042	19	37	17	1	595	66.2	4.74	High	High	High	High	High	High	High	High	Phospho [S86; S88]	2	2.849	155.86	19
High	Master Protein	A0A072URD6	Plasma membrane ATPase OS=Medicago truncatula GN=MTR_4g107500 PE=3 SV=1	0	251.365	40.501	45	176	21	1	958	105.5	6.6	High	High	High	High	High	High	High	Not Found	Deamidated [Q377]; Phospho [T957]	1	9.784	612.84	45
High	Master Protein	B7FIZ5	Chlorophyll a-b binding protein, chloroplastic OS=Medicago truncatula GN=MTR_4g015570 PE=2 SV=1	0	123.586	40.4844	12	86	11	1	289	31.5	6.57	High	High	High	High	High	High	High	Not Found	Deamidated [Q124; Q133; R134; Q238]; Phospho [T111; T113; T236]	3	35.517	344.18	12
High	Master Protein	B7FJC3	60S ribosomal protein L18a OS=Medicago truncatula GN=MTR_2g098000 PE=2 SV=1	0	33.207	40.4494	9	34	2	1	178	21.3	10.3	High	High	High	High	High	Not Found	High	High		0	6.197	99.2	9
High	Master Protein	B7FGY9	Uncharacterized protein OS=Medicago truncatula GN=MTR_4g031650 PE=2 SV=1	0	30.011	40.4412	5	9	5	1	136	15.7	6.8	High	High	High	High	Not Found	High	High	Not Found		0	2.511	30.16	5
High	Master Protein	G7L7C9	Processing peptidase OS=Medicago truncatula GN=MTR_8g102230 PE=3 SV=1	0	109.702	40.3922	18	50	16	1	510	54.9	6.05	High	High	High	High	High	High	High	High		0	5.105	175.64	18
High	Master Protein	G7LBI9	Import receptor subunit TOM40-like protein OS=Medicago truncatula GN=MTR_8g106010 PE=4 SV=1	0	85.544	40.3909	13	51	13	1	307	34.1	7.83	High	High	High	High	High	High	High	Not Found		0	7.913	186.75	13
High	Master Protein	G7LGQ5	Processing peptidase OS=Medicago truncatula GN=MTR_8g014660 PE=3 SV=1	0	101.257	40.2367	20	52	18	1	507	54.8	5.55	High	High	High	High	High	High	High	Not Found		0	5.31	165.61	20
High	Master Protein	G7JH61	30S ribosomal protein S19P OS=Medicago truncatula GN=rps19 PE=3 SV=1	0	24.99	40.2174	5	13	5	1	92	10.6	10.62	High	High	High	High	High	Not Found	Not Found	Not Found		0	9	45.11	5
High	Master Protein	Q2HSW3	Protein transporter Sec61 subunit beta-like protein OS=Medicago truncatula GN=MTR_2g093770 PE=4 SV=1	0	9.804	40.1869	3	6	3	1	107	10.7	11.3	Not Found	High	High	High	High	Not Found	Not Found	Not Found		0	2.162	21.51	3
High	Master Protein	A0A072U1R9	Calmodulin-domain kinase CDPK protein OS=Medicago truncatula GN=MTR_7g091890 PE=4 SV=1	0	130.67	40.1501	20	52	13	1	533	60.6	6.6	High	High	High	High	High	High	High	Not Found		0	4.367	201.58	20
High	Master Protein	A0A072VDW9	TCP-1/cpn60 chaperonin family protein OS=Medicago truncatula GN=MTR_1g017390 PE=3 SV=1	0	121.225	40.1015	21	49	21	1	591	62.6	5.87	High	High	High	High	High	High	High	Not Found		0	3.307	176.47	21
High	Master Protein	Q1RSH3	GroEL-like chaperone, ATPase OS=Medicago truncatula GN=MTR_1g090140 PE=3 SV=1	0	147.785	40.0697	21	46	5	1	574	61.1	6.09	Not Found	High	Not Found	High	High	High	High	Not Found	Deamidated [R187]	0	4.043	211.29	21
High	Master Protein	Q2MJ19	Cytochrome P450 family 709 protein OS=Medicago truncatula GN=CYP72A68 PE=2 SV=1	0	84.194	40	19	43	17	1	520	59.9	9.07	High	High	High	High	High	High	Not Found	Not Found		0	3.354	136.13	19
High	Master Protein	B7FJH0	Prohibitin complex protein OS=Medicago truncatula GN=MTR_3g008250 PE=2 SV=1	0	32.396	39.9281	10	23	10	1	278	30.3	8.88	High	High	High	High	High	High	Not Found	Not Found		0	2.594	66.95	10
High	Master Protein	A0A072UTJ9	Beta-glucosidase OS=Medicago truncatula GN=MTR_4g122980 PE=3 SV=1	0	107.614	39.8734	20	52	20	1	632	71.9	6.1	High	High	High	High	High	High	High	High		0	3.642	184.03	20
High	Master Protein	G7LIP6	Dicarboxylate carrier protein OS=Medicago truncatula GN=MTR_8g086070 PE=3 SV=1	0	83.189	39.8671	12	66	12	1	301	32.2	9.33	High	High	High	High	High	High	High	Not Found	Deamidated [Q137; R148; Q155]	0	7.031	245.22	12
High	Master Protein	A0A072US38	Alba DNA/RNA-binding protein OS=Medicago truncatula GN=MTR_4g011000 PE=4 SV=1	0	16.009	39.8496	4	8	4	1	133	14.5	5.97	High	High	High	Medium	High	Not Found	High	Not Found		0	1.31	25	4
High	Master Protein	G7K3P1	40S ribosomal protein S3a OS=Medicago truncatula GN=MTR_5g006440 PE=3 SV=1	0	55.261	39.8467	12	27	6	1	261	29.8	9.86	High	Not Found	High	High	High	High	Not Found	High		0	7.733	86.33	12
High	Master Protein	G7II91	NADH-ubiquinone oxidoreductase 24 kDa subunit, putative OS=Medicago truncatula GN=MTR_2g104110 PE=4 SV=1	0	70.633	39.8406	10	41	10	1	251	28	7.44	High	High	High	High	High	High	High	Not Found		0	10.788	160.43	10
High	Master Protein	A0A072VIH3	3-ketoacyl-CoA thiolase 2, peroxisomal-like protein OS=Medicago truncatula GN=MTR_1g047210 PE=3 SV=1	0	85.072	39.8268	16	40	13	1	462	48.3	7.99	High	High	High	High	High	High	Not Found	Not Found		0	4.179	155.82	16
High	Master Protein	A0A072TZS4	Transmembrane protein, putative OS=Medicago truncatula GN=MTR_7g063950 PE=4 SV=1	0	12.751	39.7849	1	1	1	1	93	8.7	8.12	Not Found	Not Found	High	Not Found	Not Found	Not Found	Not Found	Not Found		0	0.778	7.04	1
High	Master Protein	A0A072UYN5	Hydroxyproline-rich glycoprotein family protein OS=Medicago truncatula GN=MTR_3g063200 PE=4 SV=1	0	131.775	39.7701	16	61	16	1	435	47.3	6.09	High	High	High	High	High	High	High	Not Found	Deamidated [Q235; Q236; R241; Q262; Q269; Q363; Q364; Q367]; Phospho [S371]	1	7.318	203.19	16
High	Master Protein	A0A072VMC4	Malate dehydrogenase OS=Medicago truncatula GN=MTR_1g076130 PE=3 SV=1	0	55.563	39.759	9	24	5	1	332	35.6	6.55	High	High	High	High	High	High	Not Found	Not Found		0	1.873	87.78	9
High	Master Protein	G7LAJ5	40S ribosomal protein S15-4 OS=Medicago truncatula GN=MTR_8g105110 PE=2 SV=1	0	29.68	39.6104	6	22	6	1	154	17.2	10.4	High	High	High	High	High	High	High	Not Found	Deamidated [Q113]	0	9	71.06	6
High	Master Protein	G7IBY1	60S ribosomal protein L3B OS=Medicago truncatula GN=MTR_1g098540 PE=3 SV=2	0	81.818	39.5887	18	46	12	1	389	44.5	10.18	High	High	High	High	High	High	High	Not Found	Deamidated [Q185; Q205]	0	8.12	145.96	18
High	Master Protein	A0A072TM68	Cytochrome b5-like heme/steroid-binding domain protein OS=Medicago truncatula GN=MTR_8g027080 PE=3 SV=1	0	70.872	39.548	5	25	5	1	177	19.8	6.39	High	High	High	High	High	High	High	Not Found		0	5.31	144.7	5
High	Master Protein	G7JYX5	60S ribosomal protein L27a-3 OS=Medicago truncatula GN=MTR_5g033090 PE=2 SV=2	0	23.385	39.4558	7	13	1	1	147	16.6	10.71	High	Not Found	Not Found	Not Found	Not Found	Not Found	Not Found	Not Found		0	6.499	35.01	7
High	Master Protein	G7JCF5	Translocon at the outer envelope membrane ofs protein 75-III OS=Medicago truncatula GN=MTR_4g064780 PE=4 SV=1	0	230.514	39.4279	25	90	22	1	804	88	7.37	High	High	High	High	High	High	High	Not Found	Deamidated [R799]	0	6.252	372.1	25
High	Master Protein	A0A072VNM9	GDP-D-mannose-3,5-epimerase OS=Medicago truncatula GN=MTR_1g080950 PE=4 SV=1	0	67.37	39.4231	16	34	10	1	416	47.1	6.47	High	High	High	High	High	High	Not Found	Not Found		0	3.52	123.03	16
High	Master Protein	I3SSK7	Cyanate hydratase OS=Medicago truncatula GN=CYN PE=2 SV=1	0	23.333	39.3939	5	7	5	1	165	18.7	6.7	Not Found	High	High	High	High	High	Not Found	Not Found		0	1.424	27.96	5
High	Master Protein	A0A072TS91	Carnitine/acylcarnitine carrier-like protein OS=Medicago truncatula GN=MTR_8g066975 PE=3 SV=1	0	95.197	39.3939	10	48	9	1	297	30.7	9.35	High	High	High	High	High	High	Medium	Not Found	Deamidated [Q18; Q35; Q42; R45]	0	9	212.99	10
High	Master Protein	G7IRS0	Major intrinsic protein (MIP) family transporter OS=Medicago truncatula GN=MTR_2g094270 PE=3 SV=1	0	80.157	39.3728	11	49	7	1	287	30.8	7.8	High	High	High	High	High	High	High	High	Deamidated [Q8; Q20]	0	12.594	195.31	11
High	Master Protein	B7FGN8	Ubiquitin-40S ribosomal S27a-like protein OS=Medicago truncatula GN=MTR_8g088060 PE=2 SV=1	0	24.658	39.3548	7	20	1	1	155	17.7	9.77	High	Not Found	Not Found	Not Found	Not Found	Not Found	Not Found	Not Found		0	3.642	73.12	7
High	Master Protein	G7JW95	Ferredoxin--NADP reductase OS=Medicago truncatula GN=MTR_5g022300 PE=3 SV=1	0	134.634	39.3352	19	132	19	1	361	40.3	8.21	High	High	High	High	High	High	High	High	Deamidated [Q121; R275; Q300]	0	14.317	430.41	19
High	Master Protein	A0A072UAG3	Oxidoreductase/transition metal ion-binding protein, putative OS=Medicago truncatula GN=MTR_6g053740 PE=4 SV=1	0	248.458	39.185	36	85	36	1	957	105.5	4.86	High	High	High	High	High	High	High	High		0	5.813	385.12	36
High	Master Protein	G7J2M9	CBS/octicosapeptide/phox/Bemp1 (PB1) domain protein OS=Medicago truncatula GN=MTR_3g097010 PE=4 SV=1	0	139.864	39.1137	16	49	12	1	519	55.8	6.71	High	High	High	High	High	High	High	Not Found		0	5.105	227.14	16
High	Master Protein	A0A072UXU6	ADP/ATP carrier protein OS=Medicago truncatula GN=MTR_4g078545 PE=3 SV=1	0	72.59	39.0836	16	56	5	1	371	39.8	9.76	High	High	High	High	High	Not Found	Not Found	Not Found	Deamidated [Q102]	0	5.422	175.25	16
High	Master Protein	A0A072VLF0	60S acidic ribosomal protein OS=Medicago truncatula GN=MTR_2g085085 PE=3 SV=1	0	41.871	38.9381	3	8	2	1	113	11.4	4.41	Not Found	High	High	High	Not Found	Not Found	Not Found	Not Found		0	3.642	52.77	3
High	Master Protein	G7IUG9	Glyoxylate/succinic semialdehyde reductase OS=Medicago truncatula GN=MTR_2g099910 PE=4 SV=1	0	54.856	38.9381	9	12	9	1	339	36	7.52	High	High	High	High	High	Not Found	Not Found	Not Found		0	1.721	52.55	9
High	Master Protein	I3SDG7	F0F1-type ATP synthase, delta subunit OS=Medicago truncatula GN=MTR_3g028730 PE=2 SV=1	0	60.289	38.9344	9	42	9	1	244	26.7	9.72	High	High	High	High	High	High	High	Not Found		0	4.275	151.88	9
High	Master Protein	G7JCN3	Aspartate aminotransferase OS=Medicago truncatula GN=MTR_4g080140 PE=4 SV=1	0	123.953	38.9151	13	38	13	1	424	47.3	8.02	High	High	High	High	High	Not Found	Medium	Not Found		0	3.758	188.26	13
High	Master Protein	A0A072TV12	Heat shock cognate 70 kDa-like protein OS=Medicago truncatula GN=MTR_8g099945 PE=3 SV=1	0	149.108	38.7145	30	62	4	1	669	73.6	5.12	High	Not Found	Medium	High	High	High	High	Not Found		0	6.897	212.36	30
High	Master Protein	S4T093	Photosystem II CP43 reaction center protein OS=Medicago truncatula GN=psbC PE=3 SV=1	0	182.629	38.4778	19	225	19	1	473	51.9	7.21	High	High	High	High	High	High	High	High	Deamidated [R41; Q332; R343; R370; R379; Q385]; Carboxymethyl [K79]	0	214.443	856.27	19
High	Master Protein	G7JS60	Thioredoxin-dependent peroxidase OS=Medicago truncatula GN=MTR_4g124790 PE=2 SV=2	0	44.511	38.4615	7	14	7	1	221	24.2	9.47	High	High	High	High	High	Not Found	High	Not Found	Deamidated [Q198]	0	2.415	63.73	7
High	Master Protein	G7JTD2	Ribulose bisphosphate carboxylase/oxygenase activase OS=Medicago truncatula GN=MTR_4g021210 PE=4 SV=1	0	126.346	38.4454	20	69	4	1	476	52.1	5.62	Not Found	Not Found	High	High	High	High	Not Found	Not Found	Deamidated [Q267; Q404; Q406]	0	4.995	241.48	20
High	Master Protein	G7L5N4	Cysteine synthase OS=Medicago truncatula GN=MTR_7g078070 PE=3 SV=1	0	55.346	38.4211	16	36	16	1	380	40.9	8.19	High	High	High	High	High	Medium	Medium	Medium		0	3.924	121.47	16
High	Master Protein	G7KLJ7	Cytochrome b5-like heme/steroid-binding domain protein OS=Medicago truncatula GN=MTR_6g054890 PE=2 SV=1	0	81.991	38.2979	7	57	4	1	235	25.8	4.77	High	High	High	High	High	High	High	High	Carboxymethyl [K175]; Deamidated [Q97]	0	22.101	250.45	7
High	Master Protein	G7IEZ6	Chalcone-flavonone isomerase family protein OS=Medicago truncatula GN=MTR_1g115820 PE=2 SV=1	0	41.266	38.2883	6	9	6	1	222	23.8	5.47	High	High	High	High	Not Found	High	High	Not Found		0	1.929	40.09	6
High	Master Protein	B7FN18	Adenylate kinase OS=Medicago truncatula GN=MTR_4g103800 PE=2 SV=1	0	57.561	38.2716	11	23	11	1	243	26.7	7.81	High	High	High	High	High	High	Not Found	Not Found		0	3.833	81.93	11
High	Master Protein	A0A072UL69	Ubiquitin-NEDD8 RUB1-like protein OS=Medicago truncatula GN=MTR_4g073580 PE=4 SV=1	0	30.549	38.2514	7	20	1	1	183	20.4	8.12	High	Not Found	Not Found	Not Found	Not Found	Not Found	Not Found	Not Found		0	2.728	76.29	7
High	Master Protein	A0A072VPV6	60S ribosomal protein L7 OS=Medicago truncatula GN=MTR_1g022385 PE=4 SV=1	0	54.563	38.1818	12	32	12	1	275	32.3	9.83	High	High	High	High	High	High	Not Found	Not Found	Deamidated [R263]	0	6.848	120.4	12
High	Master Protein	A0A072TYR3	Thylakoid rhodanese-like protein OS=Medicago truncatula GN=MTR_8g027835 PE=4 SV=1	0	82.593	38.1743	12	32	12	1	482	50.9	5.21	High	High	High	High	High	High	High	Not Found		0	3.806	138.51	12
High	Master Protein	B7FHR0	60S ribosomal L4-like protein OS=Medicago truncatula GN=MTR_5g025120 PE=2 SV=1	0	81.703	37.9902	16	32	3	1	408	44.9	10.4	Not Found	Not Found	Not Found	High	High	High	High	Not Found		0	4.38	121.99	16
High	Master Protein	A0A072UA59	Small nuclear ribonucleoprotein OS=Medicago truncatula GN=MTR_6g066250 PE=4 SV=1	0	9.004	37.8049	2	2	2	1	82	9.1	5.26	Not Found	Not Found	Not Found	Not Found	High	Not Found	High	Not Found		0	1.154	6.14	2
High	Master Protein	G8A207	Carboxy-terminal region remorin OS=Medicago truncatula GN=MTR_1g100647 PE=2 SV=1	0	44.99	37.799	7	17	7	1	209	23.1	8.12	High	High	High	High	High	High	High	Not Found		0	2.652	63.63	7
High	Master Protein	G7JWI9	NAD(P)H dehydrogenase OS=Medicago truncatula GN=MTR_5g042420 PE=2 SV=1	0	51.72	37.7358	7	37	7	1	212	23.9	4.7	High	High	High	High	High	High	Not Found	Not Found		0	18.953	159.52	7
High	Master Protein	G7IAZ5	Pti1-like kinase OS=Medicago truncatula GN=MTR_1g116520 PE=3 SV=2	0	65.869	37.7171	14	43	12	1	403	44.8	8.63	High	High	High	High	High	High	Not Found	High		0	3.299	140.85	14
High	Master Protein	G7I6N5	60S ribosomal L4-like protein OS=Medicago truncatula GN=MTR_1g045410 PE=4 SV=1	0	80.187	37.6847	15	34	2	1	406	44.7	10.43	Not Found	Not Found	Not Found	High	High	High	Not Found	Not Found		0	3.642	134.17	15
High	Master Protein	G7JF62	NADH-ubiquinone oxidoreductase 18 kDa subunit OS=Medicago truncatula GN=MTR_4g097160 PE=2 SV=1	0	33.401	37.6623	6	13	6	1	154	17.3	9.6	High	High	High	High	High	Not Found	Not Found	Not Found		0	3.329	47.13	6
High	Master Protein	G7J2H2	Glyceraldehyde-3-phosphate dehydrogenase OS=Medicago truncatula GN=MTR_3g085850 PE=3 SV=1	0	50.539	37.6471	12	32	5	1	340	37	7.47	High	High	High	High	High	Not Found	Not Found	Not Found		0	3.062	103.03	12
High	Master Protein	A0A072VAN9	Photosystem II Pbs27 protein OS=Medicago truncatula GN=MTR_2g090200 PE=3 SV=1	0	60.627	37.6471	7	21	7	1	170	18.7	9.94	High	High	High	High	High	High	High	Not Found		0	9	80.89	7
High	Master Protein	G7IPB4	NADH-ubiquinone oxidoreductase complex I, 21 kDa subunit OS=Medicago truncatula GN=MTR_2g026500 PE=2 SV=1	0	16.712	37.6238	3	15	3	1	101	10.9	9.47	High	High	High	High	High	High	High	Not Found	Deamidated [Q79]	0	3.642	36.7	3
High	Master Protein	G7JIA6	Protein transporter Sec61 subunit beta-like protein OS=Medicago truncatula GN=MTR_4g028080 PE=2 SV=1	0	5.385	37.5	3	5	1	1	80	8	10.52	Not Found	Not Found	Not Found	Not Found	Not Found	High	Not Found	Not Found		0	2.162	11.07	3
High	Master Protein	G7J8E5	DnaJ heat shock amino-terminal domain protein, putative OS=Medicago truncatula GN=MTR_3g104980 PE=4 SV=1	0	90.84	37.4408	9	46	9	1	211	23.4	4.7	High	High	High	High	High	High	High	Not Found	Deamidated [Q118]	0	16.013	189.67	9
High	Master Protein	G7JBZ8	Import receptor subunit TOM20 OS=Medicago truncatula GN=MTR_3g085410 PE=2 SV=1	0	35.279	37.4384	7	19	7	1	203	22.5	5.2	High	High	High	High	High	High	High	Not Found	Deamidated [R124]	0	6.017	50.24	7
High	Master Protein	G7J4S6	60S ribosomal protein L27a-3 OS=Medicago truncatula GN=MTR_3g077050 PE=2 SV=1	0	19.994	37.415	7	13	1	1	147	16.6	10.71	High	Not Found	Not Found	Not Found	Not Found	Not Found	Not Found	Not Found		0	6.499	34.09	7
High	Master Protein	G7K5X3	Cystathionine beta-synthase (CBS) family protein OS=Medicago truncatula GN=MTR_5g076080 PE=4 SV=1	0	41.257	37.4016	10	23	10	1	254	28.1	9.61	High	High	High	High	High	Not Found	Medium	Not Found		0	3.87	74.56	10
High	Master Protein	A0A072VQC5	Tubulin alpha-6 chain, putative OS=Medicago truncatula GN=MTR_1g105970 PE=4 SV=1	0	34.688	37.3832	6	9	6	1	214	24.3	7.88	Not Found	High	Not Found	High	High	High	Not Found	High		0	2.831	32.09	6
High	Master Protein	A0A072VA42	Cytochrome P450 family 72 protein OS=Medicago truncatula GN=MTR_2g072380 PE=4 SV=1	0	90.917	37.3225	17	45	12	1	493	56.3	8.32	High	High	High	High	High	High	Not Found	Not Found		0	3.084	149.87	17
High	Master Protein	G7I4U4	Plastid fibrillin OS=Medicago truncatula GN=MTR_1g075660 PE=4 SV=1	0	53.041	37.3188	7	9	7	1	276	29.7	7.44	High	High	Not Found	Not Found	Not Found	High	Not Found	Not Found		0	2.162	42.82	7
High	Master Protein	A0A072UFB5	Ras-related small GTP-binding family protein OS=Medicago truncatula GN=MTR_7g112090 PE=3 SV=1	0	25.216	37.3057	6	8	3	1	193	22	7.05	Not Found	High	High	Not Found	Not Found	High	Not Found	Not Found		0	2.162	26.75	6
High	Master Protein	Q2HSV2	Thioredoxin domain 2; Thioredoxin fold OS=Medicago truncatula GN=MTR_2g093680 PE=2 SV=2	0	19.738	37.2671	6	12	6	1	161	18.2	5.03	High	High	High	High	High	High	High	Not Found		0	3.329	33.21	6
High	Master Protein	G7KIQ9	Carbonic anhydrase OS=Medicago truncatula GN=MTR_6g006990 PE=3 SV=1	0	104.878	37.1601	12	53	12	1	331	35.6	7.42	High	High	High	High	High	High	High	Not Found	Carboxymethyl [K100; K142]; Deamidated [Q103; Q107]; Phospho [T96; T105]	0	6.079	253.7	12
High	Master Protein	A0A072VT43	Translation elongation factor EF-2 subunit OS=Medicago truncatula GN=MTR_1g048000 PE=4 SV=1	0	250.341	37.1293	32	87	11	1	843	94.1	6.2	High	High	High	High	High	High	High	High	Deamidated [R479; R592; R610; Q623; Q750]	0	5.629	378.42	32
High	Master Protein	G7LIZ2	Lipoxygenase OS=Medicago truncatula GN=MTR_8g018690 PE=3 SV=1	0	135.474	37.1098	30	66	23	1	865	96.6	6.67	High	High	High	High	High	High	High	High		0	4.109	229.86	30
High	Master Protein	G7JNV8	Peroxisomal membrane PEX14-like protein, putative OS=Medicago truncatula GN=MTR_4g106880 PE=4 SV=2	0	72.21	37.0937	11	22	11	1	523	57	5.53	High	High	High	High	High	High	High	High	Phospho [S309; S311]	2	2.311	109.38	11
High	Master Protein	G7KF41	Carnitine/acylcarnitine carrier-like protein OS=Medicago truncatula GN=MTR_5g030530 PE=3 SV=1	0	46.309	37.037	9	17	8	1	297	30.7	9.2	High	High	High	High	High	High	Not Found	Not Found		0	2.36	57.86	9
High	Master Protein	G7L5V0	Tubulin beta chain OS=Medicago truncatula GN=MTR_7g089120 PE=3 SV=1	0	97.396	36.971	15	61	2	1	449	50.5	4.83	High	Not Found	Not Found	Not Found	Not Found	High	Not Found	Not Found		0	4.946	219.78	15
High	Master Protein	G7IAN2	Tubulin beta chain OS=Medicago truncatula GN=MTR_1g101130 PE=3 SV=1	0	109.414	36.971	15	62	1	1	449	50.5	4.83	Not Found	Not Found	Not Found	Not Found	Not Found	Not Found	High	Not Found		0	5.404	227.39	15
High	Master Protein	S4T0Y5	Photosystem II D2 protein OS=Medicago truncatula GN=psbD PE=3 SV=1	0	135.585	36.8272	14	219	5	1	353	39.5	5.55	High	High	High	High	High	High	High	Not Found	Deamidated [Q240; R295; Q302; R327; Q333; Q335; R349]	0	157.489	770.98	14
High	Master Protein	G7LGP4	Phosphotransferase OS=Medicago truncatula GN=MTR_8g014530 PE=3 SV=1	0	114.781	36.6397	15	35	11	1	494	53.5	5.99	High	High	High	High	High	High	High	Not Found		0	3.52	150.7	15
High	Master Protein	A0A072USE9	Cytochrome C oxidase, subunit VIb family protein OS=Medicago truncatula GN=MTR_4g129710 PE=4 SV=1	0	5.935	36.5854	4	8	3	1	82	9.8	7.8	High	High	Not Found	Not Found	Medium	Medium	Not Found	Not Found		0	2.728	16.77	4
High	Master Protein	G7IIC1	Oligosaccharyltransferase complex subunit OSTC-like protein OS=Medicago truncatula GN=MTR_2g038390 PE=2 SV=1	0	20.668	36.5714	4	9	4	1	175	19.1	9.64	High	High	High	High	Not Found	High	Not Found	Not Found	Deamidated [Q109]	0	2.162	32.08	4
High	Master Protein	I3SGW0	Cytochrome b5-like heme/steroid-binding domain protein OS=Medicago truncatula GN=MTR_3g092095 PE=2 SV=1	0	41.78	36.5672	4	37	4	1	134	15.2	5.33	High	High	High	High	High	High	High	Not Found	Deamidated [R69]	0	9	154.67	4
High	Master Protein	A0A072VKP7	ATPase, AAA-type, CDC48 protein OS=Medicago truncatula GN=MTR_1g063380 PE=4 SV=1	0	141.534	36.5432	27	50	9	1	810	89.7	5.19	Not Found	Not Found	High	High	High	High	High	Not Found		0	3.885	190.52	27
High	Master Protein	G7JC94	60S acidic ribosomal protein P0 OS=Medicago truncatula GN=MTR_3g108280 PE=3 SV=1	0	62.602	36.5325	9	17	5	1	323	34.4	5.34	High	High	High	High	High	High	Not Found	Not Found	Phospho [S311]	1	3.084	79.58	9
High	Master Protein	G7JF34	Thioredoxin OS=Medicago truncatula GN=MTR_4g081380 PE=4 SV=1	0	27.412	36.5079	4	9	4	1	126	14.3	7.12	Not Found	Not Found	Not Found	High	High	High	High	Not Found		0	3.642	37.87	4
High	Master Protein	A0A072VF11	40S ribosomal protein S2-4 OS=Medicago truncatula GN=MTR_1g032450 PE=3 SV=1	0	54.085	36.4621	11	25	2	1	277	30.4	10.32	Not Found	Not Found	Not Found	Not Found	High	Not Found	Not Found	Not Found		0	4.012	86.93	11
High	Master Protein	B7FJV5	Transmembrane protein, putative OS=Medicago truncatula GN=MTR_6g029250 PE=2 SV=1	0	39.934	36.4035	7	13	7	1	228	26	4.88	High	High	High	High	High	High	Medium	Medium		0	2.415	52.48	7
High	Master Protein	A0A072VPF0	Elongation factor 1-alpha OS=Medicago truncatula GN=MTR_1g095703 PE=3 SV=1	0	85.855	36.3839	16	69	1	1	448	49.4	9.06	High	High	Not Found	Not Found	Not Found	Not Found	Not Found	Not Found	Deamidated [Q331]; Carboxymethyl [K359]	0	4.946	224.58	16
High	Master Protein	A0A072UWE4	Membrane lipoprotein, putative OS=Medicago truncatula GN=MTR_3g053460 PE=4 SV=1	0	7.815	36.3636	2	4	2	1	55	6.2	8.69	Not Found	Not Found	Not Found	Not Found	High	High	High	Not Found		0	9	11.45	2
High	Master Protein	G7J5Y4	Glyceraldehyde-3-phosphate dehydrogenase OS=Medicago truncatula GN=MTR_3g115920 PE=3 SV=1	0	108.837	36.3636	17	53	13	1	451	47.9	7.2	High	High	High	High	High	High	Not Found	Not Found		0	4.412	210.47	17
High	Master Protein	G7L2L3	NADH-cytochrome b5 reductase OS=Medicago truncatula GN=MTR_7g087090 PE=2 SV=1	0	53.764	36.3309	10	33	10	1	278	30.8	8.22	High	High	High	High	High	High	High	Not Found		0	6.356	113.08	10
High	Master Protein	G7JG73	RNA-binding (RRM/RBD/RNP motif) family protein OS=Medicago truncatula GN=MTR_4g070140 PE=4 SV=1	0	24.834	36.3158	5	9	5	1	190	18.4	5.43	High	High	High	High	High	Not Found	Not Found	Not Found		0	0.848	29.13	5
High	Master Protein	B7FMX7	60S acidic ribosomal protein OS=Medicago truncatula GN=MTR_0227s0020 PE=2 SV=1	0	10.517	36.2832	2	3	1	1	113	11.3	4.37	Not Found	Not Found	Not Found	High	Not Found	Not Found	Not Found	Not Found		0	0.931	13.35	2
High	Master Protein	A0A072U637	Serine/Threonine kinase family protein OS=Medicago truncatula GN=MTR_8g100085 PE=4 SV=1	0	95.878	36.2319	17	46	16	1	414	46.3	7.49	High	High	High	High	High	High	High	Not Found		0	4.52	157.57	17
High	Master Protein	G7LAL7	40S ribosomal protein S2-4 OS=Medicago truncatula GN=MTR_8g105340 PE=3 SV=1	0	70.221	36.2007	10	29	1	1	279	30.4	10.32	High	High	High	High	Not Found	Not Found	Not Found	Not Found		0	4.456	117.86	10
High	Master Protein	G7JPC5	Major intrinsic protein (MIP) family transporter OS=Medicago truncatula GN=MTR_4g059390 PE=2 SV=1	0	68.165	36.1404	9	44	5	1	285	30.5	7.09	High	High	High	High	High	High	High	High	Deamidated [Q8]	0	9	181.51	9
High	Master Protein	G7J567	General regulatory factor 2 OS=Medicago truncatula GN=MTR_3g100620 PE=2 SV=1	0	22.549	36.1111	8	21	4	1	252	28.4	4.77	High	Not Found	High	High	High	Not Found	Not Found	Not Found		0	2.162	59.74	8
High	Master Protein	Q8GV75	Auxin efflux carrier component OS=Medicago truncatula GN=PIN3 PE=3 SV=1	0	100.939	36.0709	17	38	13	1	621	68.2	8.18	High	High	High	High	High	High	High	High	Phospho [S174; S290]	2	2.455	140.85	17
High	Master Protein	B7FGY5	Cytochrome b-c1 complex subunit 7 OS=Medicago truncatula GN=MTR_1g011880 PE=2 SV=1	0	17.464	36.0656	4	11	4	1	122	14.4	9.45	High	High	High	High	High	High	High	Not Found		0	4.623	32.52	4
High	Master Protein	A0A072TTN3	RAB GTPase-like protein A1D OS=Medicago truncatula GN=MTR_8g089985 PE=4 SV=1	0	44.138	36	8	14	6	1	225	24.9	5.99	High	High	High	High	High	High	Not Found	Not Found	Deamidated [Q193]	0	2.162	44.87	8
High	Master Protein	A0A072V9J5	Embryo defective 2737 protein OS=Medicago truncatula GN=MTR_2g079060 PE=4 SV=1	0	52.657	35.867	14	28	14	1	421	48.3	6.29	High	High	High	High	High	High	High	Not Found		0	3.365	80.04	14
High	Master Protein	A0A072UQW2	31 kDa ribonucleoprotein OS=Medicago truncatula GN=MTR_4g104470 PE=4 SV=1	0	46.901	35.6667	7	17	7	1	300	33.5	5.05	High	High	High	High	High	High	High	High		0	1.512	78.4	7
High	Master Protein	I3SYK2	Gamma carbonic anhydrase-like protein OS=Medicago truncatula GN=MTR_1g022405 PE=2 SV=1	0	75.391	35.6618	7	21	5	1	272	29.6	6.43	High	High	High	High	Not Found	Not Found	Not Found	Not Found		0	3.642	94.54	7
High	Master Protein	G7I7H7	Thylakoid lumen 18.3 kDa protein OS=Medicago truncatula GN=MTR_1g082420 PE=4 SV=1	0	58.274	35.6401	12	40	12	1	289	31.4	7.33	High	High	High	High	High	High	High	Not Found	Deamidated [Q281]	0	9	137.32	12
High	Master Protein	A0A072UKK0	Secretory carrier-associated membrane protein OS=Medicago truncatula GN=MTR_4g046110 PE=3 SV=1	0	78.442	35.6209	7	30	6	1	306	34.2	8.22	High	High	High	High	High	High	High	Not Found	Phospho [S55]	1	5.31	130.29	7
High	Master Protein	G7K1D4	Carbonic anhydrase OS=Medicago truncatula GN=MTR_5g034250 PE=3 SV=1	0	99.488	35.6115	9	32	9	1	278	30.4	6.54	High	High	High	High	High	High	High	Not Found	Deamidated [R73; Q123]; Phospho [S117]	1	10.659	143.47	9
High	Master Protein	G7JCD0	Plasma membrane ATPase OS=Medicago truncatula GN=MTR_3g108800 PE=3 SV=1	0	203.769	35.5415	35	119	11	1	951	104.6	6.83	High	High	High	High	High	High	High	High	Deamidated [Q27; R422; Q516]	0	4.029	396.47	35
High	Master Protein	G7IEW7	Ribosomal protein S13P/S18e OS=Medicago truncatula GN=MTR_6g043210 PE=2 SV=1	0	22.471	35.5263	7	17	4	1	152	17.6	10.54	High	High	High	High	High	High	High	Not Found	Phospho [S2]	1	6.743	55.8	7
High	Master Protein	A0A072TMC2	Membrane fusion protein Use1 OS=Medicago truncatula GN=MTR_8g027710 PE=4 SV=1	0	31.055	35.5102	8	13	2	1	245	27.3	5.64	Not Found	Not Found	High	Not Found	Not Found	High	Not Found	Not Found		0	1.976	48.27	8
High	Master Protein	G7I7M0	GTP-binding elongation factor Tu family protein OS=Medicago truncatula GN=MTR_1g013680 PE=3 SV=2	0	88.925	35.4839	16	71	2	1	465	51.3	8.81	High	High	Not Found	High	Not Found	Not Found	Not Found	Not Found	Deamidated [Q334]; Carboxymethyl [K362]	0	3.977	238.07	16
High	Master Protein	I3SQE3	Type II peroxiredoxin OS=Medicago truncatula GN=MTR_7g103610 PE=2 SV=1	0	37.603	35.4839	7	13	7	1	217	23.2	8.35	High	High	High	High	High	High	Not Found	Not Found		0	2.162	46.75	7
High	Master Protein	G7LCR3	Calcium-dependent lipid-binding (CaLB domain) family protein OS=Medicago truncatula GN=MTR_8g035590 PE=4 SV=1	0	79.271	35.4776	11	29	11	1	513	55.4	8.78	High	High	High	High	High	High	High	High	Deamidated [Q504]; Phospho [S508]	1	3.175	115.55	11
High	Master Protein	A0A072TFC5	Thylakoid lumenal 16.5 kDa protein OS=Medicago truncatula GN=MTR_0339s0030 PE=4 SV=1	0	52.854	35.4701	6	8	6	1	234	25.3	9.23	High	High	High	High	High	Not Found	Not Found	Not Found		0	1.929	43.67	6
High	Master Protein	B7FN44	Calcineurin B-like protein OS=Medicago truncatula GN=MTR_5g096420 PE=2 SV=1	0	26.453	35.3982	7	13	7	1	226	26	4.83	Medium	High	High	High	High	High	Not Found	Not Found	Phospho [S216]	1	1.783	34.72	7
High	Master Protein	G7IH13	Translation elongation factor EF-2 subunit OS=Medicago truncatula GN=MTR_2g069050 PE=4 SV=1	0	194.814	35.3499	30	63	9	1	843	94.1	6.11	Not Found	High	High	High	High	High	High	Not Found	Deamidated [R479; Q750]	0	3.833	251.12	30
High	Master Protein	S4T035	Cytochrome b6 OS=Medicago truncatula GN=petB PE=3 SV=1	0	23.384	35.3488	7	18	6	1	215	24.1	8.76	High	High	High	High	High	High	Not Found	Not Found		0	2.831	53.86	7
High	Master Protein	G7I4V0	60S ribosomal L14-like protein OS=Medicago truncatula GN=MTR_1g075720 PE=4 SV=1	0	10.821	35.3383	6	8	6	1	133	15.3	10.39	Not Found	Medium	Medium	High	High	Not Found	High	Not Found		0	4.623	22.8	6
High	Master Protein	G7J8J8	60S ribosomal protein L5-2 OS=Medicago truncatula GN=MTR_3g118030 PE=3 SV=2	0	86.533	35.3333	13	46	1	1	300	34	8.92	Not Found	Not Found	Not Found	High	High	High	High	Not Found		0	14.013	166.57	13
High	Master Protein	G7KSN0	Transmembrane protein, putative OS=Medicago truncatula GN=MTR_7g091060 PE=2 SV=2	0	9.327	35.2941	2	3	2	1	68	7.1	6.61	Not Found	Not Found	Not Found	Not Found	Not Found	High	High	High		0	2.162	10.65	2
High	Master Protein	G7IF28	Plastid transketolase OS=Medicago truncatula GN=MTR_1g116120 PE=4 SV=1	0	158.938	35.2381	22	69	22	1	735	79.7	6.43	High	High	High	High	High	High	High	High	Deamidated [R298]	0	2.981	262.81	22
High	Master Protein	A0A072TZ59	ATP synthase, F1 beta subunit OS=Medicago truncatula GN=MTR_7g033755 PE=3 SV=1	0	101.789	35.2113	17	105	1	1	497	54.2	5.9	High	Not Found	Not Found	Not Found	Not Found	Not Found	Not Found	Not Found	Deamidated [Q208; Q457; Q458]; Carboxymethyl [K119]	0	7.532	322.56	17
High	Master Protein	G7JD38	Xylose isomerase OS=Medicago truncatula GN=MTR_4g128840 PE=3 SV=2	0	117.794	35.2083	17	49	17	1	480	54.2	6.44	High	High	High	High	High	High	Not Found	Not Found		0	3.87	197.07	17
High	Master Protein	G7L7F0	Phosphotransferase OS=Medicago truncatula GN=MTR_8g102460 PE=3 SV=2	0	117.313	35.1406	18	66	12	1	498	53.7	5.57	High	High	High	High	High	High	High	Not Found		0	5.629	297.45	18
High	Master Protein	G7JTZ0	Glyoxysomal malate dehydrogenase OS=Medicago truncatula GN=MTR_4g092690 PE=3 SV=1	0	67.812	35.1124	9	17	9	1	356	37.3	7.43	High	High	High	High	High	Not Found	Medium	Not Found		0	2.325	77.07	9
High	Master Protein	G7ZY98	Transmembrane protein, putative OS=Medicago truncatula GN=MTR_1g040905 PE=2 SV=1	0	14.51	35.0649	3	4	3	1	77	8.8	9.31	Not Found	Not Found	Not Found	Not Found	High	Not Found	High	Not Found		0	3.642	12.81	3
High	Master Protein	A0A072VB39	NAD(P)H-quinone oxidoreductase subunit M OS=Medicago truncatula GN=MTR_3g088645 PE=4 SV=1	0	18.937	35.0467	6	18	6	1	214	24.6	5.68	High	High	High	High	High	High	High	Not Found		0	2.162	43.84	6
High	Master Protein	G7L9X9	26S proteasome regulatory complex protein OS=Medicago truncatula GN=MTR_8g023550 PE=3 SV=1	0	76.636	35.0365	15	30	6	1	411	46.2	5.97	High	High	High	High	High	High	Not Found	Not Found		0	3.175	99.8	15
High	Master Protein	A0A072UQA3	26S proteasome regulatory particle triple-A ATPase protein OS=Medicago truncatula GN=MTR_4g094270 PE=3 SV=1	0	70.457	35.012	14	27	13	1	417	47.1	8.76	High	High	High	High	High	High	High	Not Found		0	2.687	105.51	14
High	Master Protein	G7L1U4	Ribose-5-phosphate isomerase A OS=Medicago truncatula GN=MTR_7g114900 PE=3 SV=1	0	45.749	35	7	11	7	1	280	29.9	5.59	High	High	High	High	High	High	Not Found	Not Found		0	1.818	46.12	7
High	Master Protein	G7KSH3	Rhodanese/cell cycle control phosphatase superfamily protein, putative OS=Medicago truncatula GN=MTR_7g080890 PE=4 SV=1	0	47.022	34.9296	7	15	7	1	355	39.7	8.88	High	High	High	High	High	High	High	Not Found	Deamidated [Q289; Q290]	0	1.512	60.1	7
High	Master Protein	G7J8L6	50S ribosomal protein L3P OS=Medicago truncatula GN=MTR_3g118210 PE=3 SV=1	0	39.92	34.9265	9	20	9	1	272	29.5	10.54	High	High	High	High	High	High	High	Not Found	Deamidated [Q71]	0	4.412	60.69	9
High	Master Protein	B7FLW8	40S ribosomal protein S3a OS=Medicago truncatula GN=MTR_1g103100 PE=2 SV=1	0	30.845	34.8659	9	20	3	1	261	29.7	9.82	Medium	Not Found	Not Found	High	Not Found	High	High	Not Found		0	3.437	61.81	9
High	Master Protein	G7LGQ4	Stem 28 kDa glycoprotein OS=Medicago truncatula GN=MTR_8g014650 PE=2 SV=1	0	51.338	34.8659	9	26	9	1	261	29.9	7.09	High	High	High	High	High	High	High	Not Found		0	5.494	97.5	9
High	Master Protein	G7IID6	Glutaredoxin C4 OS=Medicago truncatula GN=MTR_2g038560 PE=4 SV=1	0	18.414	34.8571	4	4	4	1	175	19.6	7.37	High	Not Found	Not Found	Not Found	Not Found	High	Not Found	Not Found		0	1.154	16.98	4
High	Master Protein	G7JTX3	26S proteasome regulatory subunit S2 1B OS=Medicago truncatula GN=MTR_4g078780 PE=4 SV=1	0	200.886	34.763	28	68	28	1	886	97.2	5.24	High	High	High	High	High	High	High	High		0	2.32	311.87	28
High	Master Protein	B7FML9	NDH-dependent flow 6 protein OS=Medicago truncatula GN=MTR_3g435320 PE=2 SV=1	0	35.987	34.6154	7	23	7	1	182	21.1	5.3	High	High	High	High	High	High	High	Medium		0	3.394	90.96	7
High	Master Protein	G7JL09	ATP synthase E chain OS=Medicago truncatula GN=MTR_4g072130 PE=2 SV=1	0	7.053	34.6154	1	1	1	1	52	5.5	10.17	Not Found	High	Not Found	Not Found	Not Found	Not Found	Not Found	Not Found		0	2.162	2.93	1
High	Master Protein	A2Q5G2	RAB GTPase-like protein C2B OS=Medicago truncatula GN=MTR_2g027660 PE=2 SV=1	0	41.895	34.5972	7	20	5	1	211	23.1	7.36	High	High	High	High	High	High	High	High		0	1.955	76.56	7
High	Master Protein	G7L2K3	Uncharacterized protein OS=Medicago truncatula GN=MTR_7g076620 PE=2 SV=1	0	23.693	34.5912	6	12	5	1	159	17.6	6.39	High	Not Found	High	Not Found	High	High	High	High	Deamidated [Q141]	0	2.455	37.44	6
High	Master Protein	G7KUJ1	S-adenosylmethionine synthase OS=Medicago truncatula GN=MTR_7g110310 PE=3 SV=1	0	55.167	34.5178	12	22	7	1	394	43.3	5.94	High	High	High	High	Medium	High	High	Not Found		0	2.631	74.76	12
High	Master Protein	B7FMD4	40S ribosomal S9-like protein OS=Medicago truncatula GN=MTR_3g005430 PE=2 SV=1	0	34.188	34.5178	9	21	9	1	197	22.9	10.24	High	High	High	High	High	High	High	Not Found		0	4.878	58.14	9
High	Master Protein	G7IIL4	Nucleosome assembly protein OS=Medicago truncatula GN=MTR_2g039680 PE=3 SV=1	0	67.561	34.5109	10	18	10	1	368	41.8	4.4	High	High	High	High	Medium	High	High	High	Deamidated [R94]	0	3.281	73.23	10
High	Master Protein	G7K6T1	Acyl-CoA-binding domain protein OS=Medicago truncatula GN=MTR_5g026740 PE=2 SV=1	0	12.087	34.4444	2	2	2	1	90	10	5.48	Not Found	Not Found	High	Not Found	Not Found	High	Not Found	Not Found		0	1.512	9.07	2
High	Master Protein	A0A072TTH9	Uncharacterized protein OS=Medicago truncatula GN=MTR_8g089640 PE=4 SV=1	0	27.291	34.375	3	12	3	1	64	7.7	7.42	High	High	High	High	Not Found	Not Found	Not Found	Not Found		0	16.783	49.86	3
High	Master Protein	A0A0C3UMZ7	L-galactono-1,4-lactone dehydrogenase OS=Medicago truncatula GN=MTR_1g050360 PE=4 SV=2	0	148.097	34.3284	25	68	25	1	603	68.9	8.54	High	High	High	High	High	High	High	Not Found	Deamidated [R158]	0	4.78	259.53	25
High	Master Protein	I3SJF6	60S ribosomal protein L18a OS=Medicago truncatula GN=MTR_3g046320 PE=2 SV=1	0	26.324	34.2697	8	21	1	1	178	21.4	10.27	Not Found	Not Found	Not Found	High	Not Found	Not Found	Not Found	Not Found		0	3.394	60.91	8
High	Master Protein	B7FGL9	Ribosomal protein OS=Medicago truncatula GN=MTR_3g070930 PE=2 SV=1	0	36.515	34.2593	7	15	7	1	216	24.4	9.83	High	High	High	High	Not Found	Not Found	High	High		0	2.981	51.27	7
High	Master Protein	G7J914	Caffeic acid O-methyltransferase OS=Medicago truncatula GN=MTR_3g092900 PE=3 SV=1	0	47.014	34.2466	8	13	8	1	365	39.9	6.05	Not Found	High	High	High	High	Not Found	Not Found	Not Found		0	1.291	57.42	8
High	Master Protein	G7KFK1	Translocon at the inner envelope membrane ofs 110 protein OS=Medicago truncatula GN=MTR_5g074690 PE=4 SV=1	0	188.811	34.2397	30	102	30	1	993	109.7	6.34	High	High	High	High	High	High	High	Medium	Deamidated [R976]	0	3.938	363.34	30
High	Master Protein	G7J9K5	1-aminocyclopropane-1-carboxylate oxidase OS=Medicago truncatula GN=MTR_3g083370 PE=3 SV=1	0	62.35	34.1853	10	18	8	1	313	35.6	5.39	Not Found	High	High	High	High	High	High	Not Found	Deamidated [R17]	0	4.275	77.19	10
High	Master Protein	Q8GV76	Auxin efflux carrier component OS=Medicago truncatula GN=PIN1 PE=3 SV=1	0	94.666	34.1426	15	31	11	1	659	71.9	7.44	High	High	High	High	High	Not Found	High	Not Found		0	1.728	138.69	15
High	Master Protein	G7KBG1	Target SNARE coiled-coil protein OS=Medicago truncatula GN=MTR_5g065550 PE=2 SV=1	0	17.119	34.0909	3	5	3	1	132	14.8	9.17	Not Found	Not Found	High	High	Medium	High	Not Found	Not Found		0	1.371	18.93	3
High	Master Protein	Q2HUG8	Translocase of chloroplast OS=Medicago truncatula GN=MTR_7g088050 PE=3 SV=1	0	54.514	34.0361	11	44	4	1	332	36.8	9.06	High	High	High	High	High	Not Found	Not Found	Not Found		0	3.489	139.79	11
High	Master Protein	G7KN93	Cytochrome c1, heme protein OS=Medicago truncatula GN=MTR_6g023230 PE=4 SV=1	0	62.362	33.9869	8	55	4	1	306	33.3	6.62	High	High	High	High	High	High	High	High		0	4.817	222.59	8
High	Master Protein	I3SZG9	Chlorophyll a-b binding protein, chloroplastic OS=Medicago truncatula GN=MTR_5g098785 PE=2 SV=1	0	105.494	33.935	13	134	12	1	277	29.7	8.25	High	High	High	High	High	High	Medium	Not Found	Carboxymethyl [K126]; Deamidated [Q58; R109; R174; Q176]	0	41.17	421.51	13
High	Master Protein	G7L246	Membrane-anchored ubiquitin-fold protein 4 OS=Medicago truncatula GN=MTR_7g027300 PE=2 SV=1	0	7.422	33.8983	3	4	3	1	118	13.1	8.59	Not Found	High	High	Not Found	Not Found	Not Found	Not Found	Not Found		0	1.31	13.09	3
High	Master Protein	A0A072VQC0	RAB GTPase-like protein A1D OS=Medicago truncatula GN=MTR_1g097420 PE=4 SV=1	0	35.098	33.8164	7	12	4	1	207	23	5.17	High	High	High	High	High	Not Found	Not Found	Not Found		0	1.955	47.47	7
High	Master Protein	A8W459	VAMP-associated protein OS=Medicago truncatula GN=MTR_4g027050 PE=2 SV=1	0	66.55	33.75	9	22	9	1	240	26.7	8.7	High	High	High	High	High	High	High	Not Found	Deamidated [Q159]	0	4.817	94.2	9
High	Master Protein	B7FKN6	Tyrosine phosphatase, putative OS=Medicago truncatula GN=MTR_8g088420 PE=2 SV=1	0	68.808	33.7313	9	14	9	1	335	37.5	6.65	High	High	High	High	High	High	High	Not Found		0	2.548	60.55	9
High	Master Protein	B7FHA3	40S ribosomal protein S27 OS=Medicago truncatula GN=MTR_2g015680 PE=2 SV=1	0	19.771	33.7209	3	6	3	1	86	9.6	8.73	Not Found	Not Found	High	High	High	High	Not Found	Not Found		0	9	28.52	3
High	Master Protein	G7KU87	RAB GTPase-like protein B1C OS=Medicago truncatula GN=MTR_7g081700 PE=4 SV=1	0	18.101	33.6634	6	19	3	1	202	22.5	5.16	High	High	High	High	High	High	High	Not Found		0	1.448	46.28	6
High	Master Protein	G7I9Z0	Glycine dehydrogenase [decarboxylating] protein OS=Medicago truncatula GN=MTR_1g016230 PE=3 SV=1	0	263.972	33.6174	38	129	38	1	1056	114.6	7.31	High	High	High	High	High	High	High	High		0	7.64	498.06	38
High	Master Protein	A0A072U593	Gamma carbonic anhydrase-like protein OS=Medicago truncatula GN=MTR_8g096820 PE=4 SV=1	0	49.502	33.5968	6	14	6	1	253	27.8	7.56	High	High	High	High	High	High	High	Not Found		0	1.955	66.49	6
High	Master Protein	S4SZH9	NADH-quinone oxidoreductase subunit D OS=Medicago truncatula GN=ndhH PE=3 SV=1	0	80.132	33.5878	13	39	1	1	393	45.7	5.36	High	Medium	Not Found	High	Not Found	Not Found	Not Found	Not Found	Deamidated [Q88; Q93]	0	5.31	138.88	13
High	Master Protein	A0A072UHR3	Elongation factor 1-beta OS=Medicago truncatula GN=MTR_4g019610 PE=3 SV=1	0	27.45	33.5821	7	9	3	1	268	29.4	4.67	Not Found	Not Found	High	Not Found	High	High	Not Found	Not Found		0	1.929	30.61	7
High	Master Protein	G7LGN0	Drug resistance transporter-like ABC domain protein OS=Medicago truncatula GN=MTR_8g014360 PE=3 SV=2	0	229.218	33.5811	51	160	35	1	1480	167.3	7.21	High	High	High	High	High	High	High	High		0	3.034	528.88	51
High	Master Protein	G7LIV6	Acetyl-CoA carboxylase biotin carboxylase subunit OS=Medicago truncatula GN=MTR_8g101330 PE=2 SV=2	0	77.465	33.5793	16	28	15	1	542	59.4	7.66	High	High	High	High	High	High	Medium	Not Found		0	1.976	102.39	16
High	Master Protein	G7ICX2	ATP-dependent Clp protease proteolytic subunit OS=Medicago truncatula GN=MTR_1g086940 PE=3 SV=1	0	61.042	33.5526	10	26	10	1	304	33.2	8.37	High	Not Found	High	High	High	High	High	Not Found	Deamidated [Q249; Q252]	0	5.813	103.49	10
High	Master Protein	A0A072U3K0	Legumin A2 OS=Medicago truncatula GN=MTR_7g097000 PE=3 SV=1	0	110.738	33.5217	19	51	11	1	531	60.8	7.03	High	High	High	High	High	High	Medium	Not Found	Deamidated [Q241]	0	4.623	196.06	19
High	Master Protein	A0A072V2V0	ATP-dependent Clp protease ATP-binding subunit OS=Medicago truncatula GN=MTR_3g498725 PE=3 SV=1	0	200.59	33.5141	34	79	11	1	922	102.7	6.77	High	High	High	High	High	High	High	Not Found		0	4.745	332.44	34
High	Master Protein	G7J421	Tubulin alpha chain OS=Medicago truncatula GN=MTR_3g110720 PE=3 SV=1	0	73.518	33.4812	13	37	3	1	451	49.5	5.06	High	High	High	High	High	High	High	Not Found		0	3.962	144.72	13
High	Master Protein	G7KGI6	Cinnamyl alcohol dehydrogenase-like protein OS=Medicago truncatula GN=MTR_5g031300 PE=4 SV=2	0	56.018	33.4254	11	21	5	1	362	39.1	6.89	High	High	High	High	High	Not Found	Not Found	Not Found		0	3.281	81	11
High	Master Protein	A0A072VBW0	General regulatory factor 2 OS=Medicago truncatula GN=MTR_2g091225 PE=3 SV=1	0	52.104	33.3333	9	35	4	1	261	29.5	4.83	High	High	High	High	High	High	Not Found	Not Found	Deamidated [Q246]	0	3.281	115.71	9
High	Master Protein	S4SZ13	Ribosomal protein L16 OS=Medicago truncatula GN=rpl16 PE=3 SV=1	0	21.451	33.3333	4	10	2	1	135	15.3	11.55	High	High	High	Not Found	Medium	Not Found	High	Not Found		0	3.217	28.7	4
High	Master Protein	G7KFV2	UTP-glucose-1-phosphate uridylyltransferase OS=Medicago truncatula GN=MTR_5g077000 PE=4 SV=1	0	60.375	33.0544	11	17	11	1	478	52.8	5.66	High	High	High	High	High	Medium	Not Found	Not Found		0	1.254	69.24	11
High	Master Protein	A0A072TW18	F0F1-type ATP synthase, beta subunit OS=Medicago truncatula GN=MTR_0002s0650 PE=3 SV=1	0	99.995	33.0537	21	96	4	1	596	64.5	5.34	Not Found	High	High	High	High	Not Found	Not Found	Not Found	Carboxymethyl [K57; K191; K317; K318]; Deamidated [Q58; Q66; Q238; Q280; Q325]	0	5.391	281.35	21
High	Master Protein	I3SKN7	RuBisCO large subunit-binding protein OS=Medicago truncatula GN=MTR_4g057970 PE=2 SV=1	0	100.465	33.0494	17	34	16	1	587	61.9	5.16	High	High	High	High	High	High	High	Not Found		0	2.548	135.8	17
High	Master Protein	G7IF53	UDP-glucuronic acid decarboxylase-like protein OS=Medicago truncatula GN=MTR_1g088480 PE=4 SV=1	0	60.502	33.0233	12	22	10	1	430	48.3	8.22	High	High	High	High	High	High	High	High		0	2.162	80.23	12
High	Master Protein	B7FIE8	GroES chaperonin OS=Medicago truncatula GN=MTR_7g089300 PE=2 SV=1	0	12.863	32.9897	2	2	2	1	97	10.5	7.49	Not Found	Not Found	Not Found	Not Found	High	High	Not Found	Not Found		0	0.931	7.36	2
High	Master Protein	B7FGT0	40S ribosomal S7-like protein OS=Medicago truncatula GN=MTR_6g085000 PE=2 SV=1	0	35.515	32.9843	10	39	10	1	191	21.9	9.89	High	High	High	High	High	High	Not Found	Not Found		0	9	119.47	10
High	Master Protein	Q2HUK6	Mitochondrial substrate carrier OS=Medicago truncatula GN=MTR_7g083790 PE=3 SV=1	0	77.501	32.9759	12	46	9	1	373	39.5	9.25	High	High	High	High	High	High	Not Found	Not Found	Deamidated [Q343]	0	4.109	177.95	12
High	Master Protein	G7JVL8	30S ribosomal protein S15 OS=Medicago truncatula GN=rps15 PE=3 SV=1	0	9.748	32.967	4	10	4	1	91	10.8	10.42	High	High	High	High	Not Found	Not Found	Not Found	Not Found		0	4.179	23.37	4
High	Master Protein	G7KXA6	Cytochrome b-c1 complex subunit Rieske, mitochondrial OS=Medicago truncatula GN=MTR_7g084150 PE=4 SV=1	0	46.231	32.967	6	19	6	1	273	30.2	8.82	High	High	High	High	High	High	Not Found	Not Found		0	2.875	71.46	6
High	Master Protein	G7J013	Serine-glyoxylate aminotransferase-like protein OS=Medicago truncatula GN=MTR_3g053890 PE=3 SV=1	0	100.112	32.9177	14	38	13	1	401	43.9	7.11	High	High	High	High	High	Medium	High	High	Deamidated [Q23; R26; Q391]	0	5.31	130.6	14
High	Master Protein	G7JLV1	Elongation factor 1-alpha OS=Medicago truncatula GN=MTR_4g014810 PE=3 SV=1	0	64.254	32.8859	14	63	2	1	447	49.4	9.07	High	High	High	High	High	Not Found	Not Found	Not Found	Deamidated [Q331]; Carboxymethyl [K359]	0	3.417	202.42	14
High	Master Protein	A0A072VRU8	ATP synthase CF0 B subunit OS=Medicago truncatula GN=MTR_1g109420 PE=3 SV=1	0	33.738	32.8829	8	23	1	1	222	25	4.82	Not Found	Not Found	Not Found	High	Not Found	Not Found	Not Found	Not Found		0	3.437	72.14	8
High	Master Protein	A0A072UTP5	ADP/ATP carrier protein OS=Medicago truncatula GN=MTR_3g028590 PE=3 SV=1	0	64.25	32.8244	17	70	5	1	393	42.7	9.82	High	High	High	High	High	Not Found	Not Found	Not Found	Deamidated [Q124]	0	4.995	193.98	17
High	Master Protein	G7J7N5	ATP-dependent zinc metalloprotease FTSH protein OS=Medicago truncatula GN=MTR_3g104470 PE=3 SV=1	0	133.946	32.8147	21	33	19	1	707	76.6	8.38	Not Found	Not Found	Not Found	High	High	High	High	High		0	3.561	127.03	21
High	Master Protein	G7IMZ7	Lysine--tRNA ligase OS=Medicago truncatula GN=MTR_2g036600 PE=3 SV=1	0	63.466	32.7815	16	28	16	1	604	69	6.34	High	High	High	High	High	High	High	Not Found	Deamidated [Q525; R526]	0	1.598	98.31	16
High	Master Protein	G7L532	60S acidic ribosomal protein OS=Medicago truncatula GN=MTR_7g118060 PE=3 SV=1	0	11.637	32.7434	1	1	1	1	113	11.4	4.25	Not Found	Not Found	Not Found	High	Not Found	Not Found	Not Found	Not Found		0	0.585	11.18	1
High	Master Protein	A0A072VQC8	Tubulin alpha chain OS=Medicago truncatula GN=MTR_1g106005 PE=3 SV=1	0	72.838	32.6667	13	33	3	1	450	49.4	5.1	Not Found	Not Found	High	High	Not Found	Not Found	High	Not Found		0	3.962	124.13	13
High	Master Protein	A0A072V8Z3	Adenylate kinase OS=Medicago truncatula GN=MTR_2g461290 PE=3 SV=1	0	72.462	32.5464	17	28	17	1	593	66.4	8.06	High	High	High	High	High	High	High	High		0	2.162	95.63	17
High	Master Protein	A0A072TNQ7	Phosphatidylcholine-sterol acyltransferase OS=Medicago truncatula GN=MTR_8g019570 PE=4 SV=1	0	64.45	32.4963	20	37	20	1	677	75.5	6.84	High	High	High	High	High	High	High	Not Found		0	1.769	105.6	20
High	Master Protein	G7INA7	ABA-responsive protein OS=Medicago truncatula GN=MTR_2g035220 PE=2 SV=1	0	20.864	32.4841	5	7	5	1	157	16.6	5.07	Not Found	High	Not Found	High	High	Not Found	High	Not Found		0	2.594	27.97	5
High	Master Protein	G7IVB7	50S ribosomal protein L5P OS=Medicago truncatula GN=MTR_3g007700 PE=2 SV=1	0	12.409	32.4176	6	11	6	1	182	20.8	9.96	High	High	High	High	Not Found	High	Not Found	Not Found		0	2.981	28.37	6
High	Master Protein	I3SAY7	Uncharacterized protein OS=Medicago truncatula GN=MTR_3g062920 PE=2 SV=1	0	37.706	32.4074	6	12	6	1	216	24.6	8.24	High	High	High	High	High	High	Not Found	Not Found		0	1.929	50.96	6
High	Master Protein	G7J9P9	Protein translocase, putative OS=Medicago truncatula GN=MTR_3g093380 PE=4 SV=1	0	79.081	32.3194	7	23	7	1	263	28	9.8	High	High	High	High	High	High	Not Found	Not Found		0	11.115	101.4	7
High	Master Protein	G7JPW3	SPFH/band 7/PHB domain membrane-associated family protein OS=Medicago truncatula GN=MTR_4g107730 PE=4 SV=2	0	35.934	32.2695	10	37	6	1	282	31.3	6.44	High	High	High	High	High	Not Found	Not Found	Not Found	Deamidated [R266]; Carboxymethyl [K245; K252]	0	4.012	110.32	10
High	Master Protein	B7FGV9	Superoxide dismutase [Cu-Zn] OS=Medicago truncatula GN=MTR_7g114240 PE=2 SV=1	0	17.386	32.2368	2	2	2	1	152	15.2	5.86	Not Found	Not Found	High	Not Found	Not Found	Not Found	High	Not Found		0	1.154	13.05	2
High	Master Protein	G7K3H9	Syntaxin protein OS=Medicago truncatula GN=MTR_5g092870 PE=4 SV=1	0	39.091	32.1705	6	7	3	1	258	29.2	5.33	Not Found	Not Found	Not Found	High	Not Found	High	High	Not Found		0	1.448	30.43	6
High	Master Protein	A0A072UPA7	Copper ion-binding protein, putative OS=Medicago truncatula GN=MTR_4g102330 PE=4 SV=1	0	10.428	32.1429	2	2	2	1	168	19	8.63	Not Found	Not Found	High	Not Found	Not Found	Not Found	High	Not Found		0	0.668	10.63	2
High	Master Protein	A2Q2V1	ATP-citrate lyase/succinyl-CoA ligase OS=Medicago truncatula GN=MTR_2g034090 PE=4 SV=1	0	89.507	32.0724	15	26	15	1	608	65.9	7.72	High	High	High	High	High	High	Not Found	Not Found		0	1.512	106.98	15
High	Master Protein	G7JG44	RAB GTPase-like protein A1D OS=Medicago truncatula GN=MTR_4g069850 PE=4 SV=1	0	51.498	32.0388	6	19	4	1	206	23.1	5.08	High	High	High	Not Found	High	High	High	Not Found	Deamidated [Q170; Q198; R200]	0	3.87	71.13	6
High	Master Protein	G7IBV7	Light-harvesting complex I chlorophyll A/B-binding protein OS=Medicago truncatula GN=MTR_1g098280 PE=2 SV=1	0	23.449	32	5	18	5	1	175	19.2	9.22	High	High	High	High	High	Medium	Not Found	Not Found		0	1.424	72.64	5
High	Master Protein	I3SIM9	Transmembrane protein, putative OS=Medicago truncatula GN=MTR_8g447300 PE=2 SV=1	0	12.026	31.8966	4	10	4	1	116	13.5	9.72	High	High	High	High	High	High	High	Not Found		0	2.594	29.7	4
High	Master Protein	A0A072TX81	6-phosphogluconate dehydrogenase, decarboxylating OS=Medicago truncatula GN=MTR_7g017900 PE=3 SV=1	0	46.206	31.893	14	22	12	1	486	53.7	5.78	High	High	High	High	High	High	High	Not Found		0	1.512	74.1	14
High	Master Protein	G7IW52	LHCP translocation defect protein, putative OS=Medicago truncatula GN=MTR_3g019320 PE=2 SV=1	0	15.377	31.8436	5	7	4	1	179	19.7	6.57	Not Found	High	Not Found	Not Found	High	High	High	Not Found		0	1.031	21.98	5
High	Master Protein	B7FLD9	2,3-bisphosphoglycerate-independent phosphoglycerate mutase OS=Medicago truncatula GN=MTR_7g074570 PE=2 SV=1	0	53.412	31.8345	13	19	13	1	556	60.6	5.68	High	High	High	High	High	High	High	Not Found		0	1.246	67.14	13
High	Master Protein	G7JNF1	Photosystem II D2 protein OS=Medicago truncatula GN=MTR_4g073360 PE=3 SV=1	0	46.949	31.8033	8	44	1	1	305	34.2	7.78	High	Not Found	Not Found	Not Found	Not Found	Not Found	Not Found	Not Found	Deamidated [Q222; R277]; Phospho [T200]	1	17.738	148.47	8
High	Master Protein	G7JPW9	SPFH/band 7/PHB domain membrane-associated family protein OS=Medicago truncatula GN=MTR_4g107810 PE=4 SV=1	0	38.683	31.7919	11	36	5	1	346	38.5	8.09	Medium	High	High	High	High	High	Not Found	Not Found	Deamidated [Q245; R328]; Carboxymethyl [K307; K314]	0	2.831	111.4	11
High	Master Protein	Q84UC1	Glutamine synthetase OS=Medicago truncatula GN=GS2 PE=2 SV=1	0	74.314	31.7757	9	38	8	1	428	47	6.73	High	High	High	High	High	High	Not Found	High		0	3.642	168.6	9
High	Master Protein	G7L840	Import component Toc86/159, G and M domain protein OS=Medicago truncatula GN=MTR_8g088370 PE=4 SV=1	0	208.871	31.7231	33	72	33	1	1387	149.3	4.41	High	High	High	High	High	High	High	Not Found	Phospho [S68; S655; T659]	3	2.607	290.47	33
High	Master Protein	I3SN70	Photosystem I reaction center subunit III OS=Medicago truncatula GN=MTR_2g029370 PE=2 SV=1	0	29.271	31.6964	10	26	10	1	224	24.7	9.69	High	High	High	High	High	High	High	Not Found		0	6.017	70.44	10
High	Master Protein	B7FKB1	Nucleic acid-binding, OB-fold-like protein OS=Medicago truncatula GN=MTR_8g064590 PE=2 SV=1	0	20.365	31.6176	5	8	5	1	136	15.2	8.4	High	Not Found	High	High	Not Found	High	High	Not Found		0	2.981	26.87	5
High	Master Protein	G7K975	Rieske (2Fe-2S) domain protein OS=Medicago truncatula GN=MTR_5g008750 PE=4 SV=1	0	34.33	31.6176	8	15	8	1	272	30	8.13	High	High	High	High	High	High	High	High		0	1.637	48.55	8
High	Master Protein	G7K3D2	Tropomyosin-like protein, putative OS=Medicago truncatula GN=MTR_5g091710 PE=4 SV=1	0	67.894	31.5942	13	36	13	1	345	39.3	4.88	High	High	High	High	High	High	High	High		0	6.305	127.93	13
High	Master Protein	B7FIY3	General regulatory factor 2 OS=Medicago truncatula GN=MTR_5g064580 PE=2 SV=1	0	46.815	31.5385	10	26	3	1	260	29.2	4.78	Not Found	Not Found	Not Found	High	Not Found	Not Found	High	Not Found		0	3.281	80.96	10
High	Master Protein	A0A072TKG8	Ribulose bisphosphate carboxylase large chain domain protein OS=Medicago truncatula GN=MTR_0002s0660 PE=3 SV=1	0	97.978	31.524	22	123	2	1	479	53	6.68	Not Found	High	High	High	High	Medium	Not Found	Not Found	Deamidated [Q149]; Carboxymethyl [K175]	0	14.086	409.2	22
High	Master Protein	G7J6G0	Tonoplast monosaccharide transporter 2 OS=Medicago truncatula GN=MTR_3g116060 PE=3 SV=1	0	156.413	31.5068	18	78	18	1	730	78.2	5.55	High	High	High	High	High	High	High	High	Phospho [S321; S336; S441; S443]	4	7.733	326.34	18
High	Master Protein	G7IIP1	Chlorophyll a-b binding protein, chloroplastic OS=Medicago truncatula GN=MTR_2g042720 PE=3 SV=2	0	57.803	31.4607	7	25	7	1	267	29.4	6.92	High	High	High	High	High	Not Found	Not Found	Not Found		0	9	118.95	7
High	Master Protein	G7LIN7	Tubulin alpha chain OS=Medicago truncatula GN=MTR_8g085980 PE=3 SV=1	0	88.101	31.4031	14	51	5	1	449	49.5	5.14	High	High	High	High	High	High	High	Not Found	Carboxymethyl [K280]; Deamidated [R390]	0	6.406	199.49	14
High	Master Protein	A0A072TVF6	Calmodulin-domain kinase CDPK protein OS=Medicago truncatula GN=MTR_8g099095 PE=4 SV=1	0	88.555	31.3953	15	26	9	1	516	58	6.34	High	High	High	Not Found	High	High	High	High		0	2.728	97.58	15
High	Master Protein	B7FMK4	40S ribosomal protein S24 OS=Medicago truncatula GN=MTR_1g081410 PE=2 SV=1	0	19.655	31.3869	4	5	4	1	137	15.7	10.64	High	High	Not Found	High	High	Not Found	Not Found	Not Found		0	3.642	21.74	4
High	Master Protein	G7J9X2	60S ribosomal protein L39-3 OS=Medicago truncatula GN=MTR_1g013070 PE=2 SV=1	0	4.601	31.3725	2	4	2	1	51	6.5	12.12	Medium	High	Medium	Not Found	Not Found	Not Found	Not Found	Not Found		0	9	9.99	2
High	Master Protein	Q84RD9	Adenosylhomocysteinase OS=Medicago truncatula GN=AHC1 PE=3 SV=1	0	105.906	31.3402	18	57	11	1	485	53.3	5.91	High	High	High	High	High	High	High	Not Found		0	5.723	200.06	18
High	Master Protein	G7IFI5	RAB GTPase-like protein A1D OS=Medicago truncatula GN=MTR_2g014990 PE=4 SV=1	0	23.852	31.3364	5	5	3	1	217	24.2	5.53	Not Found	High	Not Found	High	Not Found	High	Not Found	Not Found		0	0.896	18.87	5
High	Master Protein	G7LHC7	TPR domain kinase OS=Medicago truncatula GN=MTR_8g098370 PE=4 SV=2	0	59.289	31.2883	14	39	10	1	489	54.6	5.58	High	High	High	High	High	High	High	Not Found		0	2.268	135.54	14
High	Master Protein	G7KTA5	Macrophage migration inhibition factor-like protein OS=Medicago truncatula GN=MTR_7g070250 PE=4 SV=1	0	5.502	31.25	2	2	2	1	112	12.3	9.07	Medium	Not Found	Not Found	High	Not Found	Not Found	Not Found	Not Found		0	1.512	7.49	2
High	Master Protein	A0A072U2G7	NAD-dependent aldehyde dehydrogenase family protein OS=Medicago truncatula GN=MTR_8g064170 PE=3 SV=1	0	79.691	31.2384	17	51	14	1	541	58.6	7.77	High	High	High	High	High	High	High	Not Found		0	2.875	164.27	17
High	Master Protein	G7K882	Phosphoribulokinase OS=Medicago truncatula GN=MTR_5g027530 PE=3 SV=1	0	80.234	31.1436	11	32	11	1	411	45.7	7.12	High	High	High	High	High	High	Not Found	Not Found	Deamidated [Q383]	0	2.594	149.05	11
High	Master Protein	G7L0I7	Cobalamin-independent methionine synthase OS=Medicago truncatula GN=MTR_7g086300 PE=3 SV=1	0	118.382	31.1333	23	52	17	1	803	88.8	6.6	High	High	High	High	High	High	High	Not Found		0	2.229	191.43	23
High	Master Protein	G7JCF2	Plastid transcriptionally active protein OS=Medicago truncatula GN=MTR_4g064750 PE=4 SV=2	0	80.434	31.1031	13	24	13	1	553	59.9	8.24	High	High	High	High	High	High	High	Not Found		0	1.865	90.74	13
High	Master Protein	G7JYQ8	Aconitate hydratase OS=Medicago truncatula GN=MTR_5g022940 PE=3 SV=1	0	132.602	31.0766	19	40	10	1	901	98.3	6.55	High	High	High	High	High	Medium	High	Not Found		0	1.698	163.21	19
High	Master Protein	A0A072V8Q4	S-adenosylmethionine synthase OS=Medicago truncatula GN=MTR_2g046710 PE=3 SV=1	0	57.072	31.0606	11	30	5	1	396	43.1	6.18	High	High	High	High	High	High	Not Found	Not Found		0	2.831	114.3	11
High	Master Protein	G7JSU6	Prohibitin complex protein OS=Medicago truncatula GN=MTR_4g078200 PE=4 SV=1	0	39.104	31.058	8	21	3	1	293	32.3	9.32	High	High	High	Not Found	Not Found	Not Found	Not Found	Not Found		0	3.87	66.04	8
High	Master Protein	A0A072V9A7	Calcium-binding EF-hand protein OS=Medicago truncatula GN=MTR_2g078340 PE=4 SV=1	0	79.764	30.9927	8	16	8	1	413	46.8	6.16	High	Not Found	High	High	High	High	High	Not Found	Deamidated [Q100]	0	2.3	76.67	8
High	Master Protein	G7J9S7	Translocon at the inner envelope membrane ofs protein 55-II OS=Medicago truncatula GN=MTR_3g105820 PE=4 SV=1	0	118.717	30.9783	17	62	17	1	552	62	8.7	High	High	High	High	High	High	High	Not Found		0	3.03	233.34	17
High	Master Protein	G7JD57	Diacylglycerol kinase OS=Medicago truncatula GN=MTR_4g129070 PE=3 SV=1	0	51.926	30.9129	16	36	16	1	482	53.5	8.28	High	High	High	High	High	High	High	High		0	2.924	102.52	16
High	Master Protein	Q1SL05	RAB GTPase-like protein A1D OS=Medicago truncatula GN=MTR_2g005510 PE=4 SV=1	0	25.523	30.9091	5	8	4	1	220	24.3	7.84	Not Found	High	Not Found	High	High	High	High	High		0	1.154	31.04	5
High	Master Protein	A0A072U0S5	Alpha-galactosidase OS=Medicago truncatula GN=MTR_7g073650 PE=3 SV=1	0	44.904	30.8824	11	21	6	1	408	45.4	8.19	High	High	High	High	Not Found	High	High	Not Found		0	1.593	60.75	11
High	Master Protein	A0A072VB76	Thioredoxin M-type protein OS=Medicago truncatula GN=MTR_3g089065 PE=4 SV=1	0	24.453	30.8571	6	23	4	1	175	19.2	8.63	High	High	High	High	High	High	High	High		0	3.329	78.38	6
High	Master Protein	G7KG90	Stress-inducible protein, putative OS=Medicago truncatula GN=MTR_5g012030 PE=4 SV=1	0	82.024	30.809	14	24	14	1	581	65.3	5.94	Not Found	High	High	High	High	High	High	Not Found		0	1.683	89.33	14
High	Master Protein	G7JT86	Membrane fusion protein Use1 OS=Medicago truncatula GN=MTR_4g126960 PE=4 SV=2	0	27.982	30.8017	7	13	1	1	237	26.5	5.81	Not Found	Not Found	High	High	Not Found	Not Found	Not Found	Not Found		0	1.637	46.91	7
High	Master Protein	G7JEQ0	B-cell receptor-associated-like protein OS=Medicago truncatula GN=MTR_4g049540 PE=2 SV=1	0	61.391	30.7692	8	39	7	1	221	25.1	9.01	High	High	High	High	High	High	High	Not Found		0	5.494	141.33	8
Low	Master Protein	G7ZVK3	Uncharacterized protein OS=Medicago truncatula GN=MTR_2g075800 PE=4 SV=1	0.151	0.473	30.7692	1	1	1	1	52	5.9	9.98	Not Found	Not Found	Medium	Not Found	Not Found	Not Found	Not Found	Not Found		0	0.468	6.47	1
High	Master Protein	I3S8V0	Stem-loop-binding protein of 41 kDa protein B OS=Medicago truncatula GN=MTR_7g111860 PE=2 SV=1	0	55.926	30.6878	9	18	9	1	378	42	7.96	High	High	High	High	High	High	High	Not Found		0	2.162	71.74	9
High	Master Protein	G7JIL4	V-type proton ATPase subunit a OS=Medicago truncatula GN=MTR_4g071070 PE=3 SV=1	0	144.674	30.6569	23	88	20	1	822	92.7	6.18	High	High	High	High	High	High	High	Not Found	Deamidated [Q177]	0	3.571	319.34	23
High	Master Protein	I3S1W3	40S ribosomal protein S6 OS=Medicago truncatula GN=MTR_4g088595 PE=2 SV=1	0	57.036	30.6452	10	22	5	1	248	28.2	10.7	High	Not Found	Not Found	High	High	High	Not Found	High		0	7.483	81.42	10
High	Master Protein	A0A072VE74	Plasma membrane ATPase OS=Medicago truncatula GN=MTR_1g009760 PE=3 SV=1	0	131.424	30.5994	31	90	6	1	951	104.7	7.58	High	High	High	High	High	High	Not Found	Not Found	Deamidated [Q145]; Phospho [T950]	1	2.398	281.79	31
High	Master Protein	I3SA92	Ribosomal protein L19 OS=Medicago truncatula GN=MTR_7g108955 PE=2 SV=1	0	21.855	30.5936	6	22	3	1	219	25.4	11.39	High	High	High	High	High	High	Not Found	Not Found		0	13.678	71.91	6
High	Master Protein	B7FGF9	60S ribosomal protein L13a-4 OS=Medicago truncatula GN=MTR_7g057770 PE=2 SV=1	0	27.179	30.5825	9	26	3	1	206	23.4	10.3	High	High	High	High	High	High	Not Found	Not Found		0	5.813	77.66	9
High	Master Protein	G7ITZ5	Aconitate hydratase OS=Medicago truncatula GN=MTR_2g088360 PE=3 SV=1	0	159.63	30.5414	24	53	12	1	979	107	7.72	High	High	High	High	High	High	High	Not Found		0	1.721	197.3	24
High	Master Protein	G7J5X6	Plastocyanin OS=Medicago truncatula GN=MTR_3g114850 PE=2 SV=1	0	54.7	30.5389	3	17	3	1	167	17.1	5.16	High	High	High	High	High	High	Not Found	Not Found		0	3.217	115.36	3
High	Master Protein	A0A072TZJ4	RPM1 interacting protein 4 transcript protein OS=Medicago truncatula GN=MTR_7g056147 PE=4 SV=1	0	19.751	30.5221	5	7	5	1	249	27.6	8.25	Not Found	Not Found	Not Found	High	High	High	High	Not Found	Phospho [S101; S134]	2	1.254	29.65	5
High	Master Protein	G7JNU1	RING-H2 finger ATL48-like protein OS=Medicago truncatula GN=MTR_4g106700 PE=2 SV=1	0	8.133	30.4878	2	5	2	1	82	9	9.77	High	High	High	High	Not Found	Not Found	Not Found	Not Found		0	1.512	15.91	2
High	Master Protein	B7FIN8	Cinnamyl alcohol dehydrogenase-like protein OS=Medicago truncatula GN=MTR_5g031250 PE=2 SV=1	0	45.543	30.4709	9	15	4	1	361	39	6.4	High	High	High	High	High	Not Found	Not Found	Not Found		0	2.162	60.58	9
High	Master Protein	G7J486	Elongation factor Tu OS=Medicago truncatula GN=MTR_3g076660 PE=3 SV=1	0	63.763	30.4703	14	49	14	1	489	53.2	6.65	High	High	High	High	High	High	High	High		0	2.808	164.87	14
High	Master Protein	A0A072VMR9	60S ribosomal protein L23a-2 OS=Medicago truncatula GN=MTR_2g096340 PE=3 SV=1	0	27.21	30.4348	7	22	7	1	161	18.1	10.24	High	High	High	High	High	Medium	Not Found	Not Found		0	6.943	80.61	7
High	Master Protein	A0A072UJ41	Dienelactone hydrolase family protein OS=Medicago truncatula GN=MTR_4g049830 PE=4 SV=1	0	32.419	30.4348	6	11	6	1	276	30.1	6.87	Medium	High	High	High	High	High	Not Found	Not Found		0	1.371	49.27	6
High	Master Protein	G7KE15	Calcium ion-binding protein OS=Medicago truncatula GN=MTR_5g069410 PE=4 SV=1	0	77.126	30.3887	16	31	16	1	566	64.6	5.34	High	High	High	High	High	High	Not Found	Not Found		0	2.594	108.74	16
High	Master Protein	G7JH26	ADP-ribosylation factor-like protein A1D OS=Medicago truncatula GN=MTR_4g026950 PE=3 SV=1	0	23.359	30.303	3	11	1	1	165	18.3	8.44	High	High	High	High	High	Not Found	Not Found	Not Found	Deamidated [Q9]	0	1.848	42.08	3
High	Master Protein	Q2HTL7	Glycoprotein membrane GPI-anchored protein OS=Medicago truncatula GN=MTR_7g113640 PE=4 SV=1	0	42.539	30.2564	6	25	6	1	195	21.4	5.77	High	High	High	High	High	High	Not Found	Not Found	Deamidated [Q76]	0	3.924	88.22	6
High	Master Protein	A0A072TD83	50S ribosomal protein L16 OS=Medicago truncatula GN=MTR_1779s0010 PE=3 SV=1	0	10.483	30.2521	3	6	1	1	119	13.3	11.17	Not Found	High	Not Found	Not Found	Not Found	Not Found	Not Found	Not Found		0	1.683	18.66	3
High	Master Protein	G7J9N5	SPFH domain/band 7 family protein OS=Medicago truncatula GN=MTR_3g093220 PE=4 SV=1	0	79.314	30.25	11	27	11	1	400	43.4	8.44	High	High	High	High	High	Not Found	High	Not Found		0	2.631	110.65	11
High	Master Protein	A0A072TZB9	40S ribosomal protein S6 OS=Medicago truncatula GN=MTR_7g053160 PE=3 SV=1	0	31.553	30.2419	9	15	4	1	248	28.2	10.7	Not Found	Not Found	Not Found	Not Found	Medium	High	High	Not Found	Deamidated [Q34]	0	6.017	43.64	9
High	Master Protein	I3S111	RAB GTPase-like protein A1D OS=Medicago truncatula GN=MTR_4g064897 PE=2 SV=1	0	43.216	30.2326	4	10	3	1	215	23.7	6.68	Not Found	Not Found	High	High	High	High	Not Found	Not Found		0	1.371	58.27	4
High	Master Protein	G7K6C4	Thylakoid soluble phosphoprotein TSP9 protein OS=Medicago truncatula GN=MTR_5g069990 PE=4 SV=1	0	9.748	30.1887	4	8	4	1	106	11.1	9.88	High	High	Medium	High	High	Not Found	High	Not Found		0	1.783	23.53	4
High	Master Protein	A0A072USU9	TGB12K interacting protein OS=Medicago truncatula GN=MTR_3g009280 PE=4 SV=1	0	50.436	30.1724	11	22	11	1	348	37.2	4.59	High	High	High	High	High	High	High	High		0	2.162	94.1	11
High	Master Protein	G7L8S9	Leucine zipper EF-hand transmembrane protein OS=Medicago truncatula GN=MTR_8g088580 PE=4 SV=2	0	108.456	30.1105	23	61	23	1	724	82.3	5.77	High	High	High	High	High	High	High	Not Found	Deamidated [R350]	0	3.796	185.29	23
High	Master Protein	G7KZG9	Inosine-5'-monophosphate dehydrogenase OS=Medicago truncatula GN=MTR_7g085560 PE=3 SV=2	0	49.544	30.0797	11	15	11	1	502	54	6.11	Not Found	High	Not Found	High	High	High	High	Not Found		0	1.264	60.26	11
High	Master Protein	G7I7Q4	Heat shock protein 81-2 OS=Medicago truncatula GN=MTR_1g025430 PE=3 SV=1	0	132.062	30.0733	30	64	29	1	818	94.1	4.89	High	High	High	High	High	High	High	High		0	3.942	218.2	30
High	Master Protein	G7K6J9	Rubredoxin family protein OS=Medicago truncatula GN=MTR_5g008050 PE=2 SV=2	0	56.37	30.0366	5	17	5	1	273	28.6	9.67	Not Found	High	High	High	High	High	Not Found	Not Found		0	1.818	84.29	5
High	Master Protein	A0A072VMH0	2-methyl-6-phytylbenzoquinone methyltransferase OS=Medicago truncatula GN=MTR_1g076570 PE=3 SV=1	0	90.166	30	13	46	10	1	340	38.6	9.45	High	High	High	High	High	High	High	Not Found		0	10.45	184.14	13
High	Master Protein	A0A072UFC0	Haloacid dehalogenase-like hydrolase family protein OS=Medicago truncatula GN=MTR_7g112140 PE=4 SV=1	0	144.685	29.9722	26	51	26	1	1081	118	5.87	High	High	High	High	High	High	High	Not Found	Deamidated [Q766]	0	2.054	200.37	26
High	Master Protein	G7I4S6	Uncharacterized protein OS=Medicago truncatula GN=MTR_1g075490 PE=4 SV=1	0	30.536	29.9528	6	18	6	1	424	32.8	10.52	High	High	High	High	High	High	High	Not Found		0	0.905	47.87	6
High	Master Protein	B6DXD7	Vacuolar H+-translocating inorganic pyrophosphatase OS=Medicago truncatula GN=VP1 PE=2 SV=1	0	202.618	29.9346	27	176	26	1	765	80.1	5.27	High	High	High	High	High	High	High	High	Carboxymethyl [K73]	0	13.007	711.99	27
High	Master Protein	G7LIT0	ATP-dependent Clp protease ATP-binding subunit OS=Medicago truncatula GN=MTR_8g100040 PE=3 SV=1	0	153.542	29.9136	29	62	4	1	926	102.7	6.87	Not Found	Not Found	High	High	High	High	Not Found	Not Found		0	3.047	239.52	29
High	Master Protein	S4T086	ATP synthase CF0 B subunit OS=Medicago truncatula GN=atpF PE=3 SV=1	0	33.447	29.8913	7	22	1	1	184	21.1	6.58	Not Found	Not Found	High	High	High	Not Found	Not Found	Not Found		0	11.589	74.4	7
High	Master Protein	B7FMT6	Rab5-interacting family protein OS=Medicago truncatula GN=MTR_2g097270 PE=2 SV=1	0	17.556	29.8387	3	4	3	1	124	14	6.24	Not Found	High	High	High	Not Found	Not Found	Not Found	Not Found	Deamidated [Q13]	0	2.162	16.61	3
High	Master Protein	A2Q5X9	Cytochrome c, monohaem OS=Medicago truncatula GN=MTR_7g080803 PE=2 SV=1	0	9.382	29.8246	2	5	2	1	114	12.5	9.14	High	High	High	High	High	Not Found	Not Found	Not Found		0	0.668	18.3	2
High	Master Protein	A0A072UX31	NAD(P)H:quinone oxidoreductase, type IV protein OS=Medicago truncatula GN=MTR_4g069250 PE=3 SV=1	0	40.306	29.7619	7	11	7	1	252	27.1	5.5	Not Found	High	Not Found	High	High	High	Not Found	Not Found		0	3.394	40.6	7
High	Master Protein	A0A072UGS7	Calcium-transporting ATPase OS=Medicago truncatula GN=MTR_4g008650 PE=3 SV=1	0	131.397	29.7193	22	62	19	1	1033	113.1	5.72	High	High	High	High	High	High	High	Not Found	Phospho [T859]	1	2.75	228.66	22
High	Master Protein	G7K283	Ferritin OS=Medicago truncatula GN=MTR_5g083170 PE=2 SV=1	0	34.369	29.7189	8	14	7	1	249	27.9	6.13	Not Found	High	High	High	High	Not Found	Not Found	Not Found		0	1.976	49.53	8
High	Master Protein	G7KDJ3	Succinate dehydrogenase [ubiquinone] flavoprotein subunit, mitochondrial OS=Medicago truncatula GN=MTR_5g020050 PE=3 SV=1	0	97.763	29.5527	16	35	16	1	626	68.9	6.57	High	High	High	High	High	High	High	Not Found		0	2.639	146.59	16
High	Master Protein	G7KFR6	Small GTPase family RAB protein OS=Medicago truncatula GN=MTR_5g076590 PE=4 SV=1	0	22.011	29.5	5	11	5	1	200	21.9	7.28	High	High	High	High	High	High	Not Found	Not Found	Deamidated [R188; R194]	0	1.254	34.61	5
High	Master Protein	A0A072UME9	Delta(24)-sterol reductase-like protein OS=Medicago truncatula GN=MTR_4g074350 PE=4 SV=1	0	128.049	29.4533	21	103	21	1	567	65.9	8.38	High	High	High	High	High	High	High	High	Deamidated [Q445; R446; Q564]	0	7.799	362.52	21
High	Master Protein	Q2HTB6	Thylakoid membrane phosphoprotein 14 kDa protein OS=Medicago truncatula GN=MTR_7g118290 PE=2 SV=1	0	11.79	29.4444	4	5	4	1	180	19.2	7.87	Not Found	Not Found	Medium	High	Not Found	High	High	Not Found		0	1.783	15.12	4
High	Master Protein	I3TAF1	60S ribosomal L28-like protein OS=Medicago truncatula GN=MTR_8g015570 PE=2 SV=1	0	15.103	29.3706	3	6	1	1	143	16.1	10.77	Not Found	Not Found	Not Found	High	Not Found	Not Found	Not Found	Not Found		0	0.995	23.55	3
High	Master Protein	G7L3L0	60S ribosomal L8-like protein OS=Medicago truncatula GN=MTR_7g076940 PE=2 SV=1	0	23.592	29.3436	6	11	3	1	259	28	10.64	High	High	High	Not Found	High	High	Not Found	Not Found		0	1.254	39.24	6
High	Master Protein	G7L7E1	Profilin OS=Medicago truncatula GN=MTR_8g102330 PE=3 SV=1	0	12.593	29.3233	3	7	3	1	133	14.2	5.2	Not Found	Not Found	High	High	High	High	Not Found	Not Found		0	1.371	20.32	3
High	Master Protein	G7L4R0	Magnesium-protoporphyrin IX monomethyl ester cyclase OS=Medicago truncatula GN=MTR_7g088340 PE=3 SV=1	0	82.917	29.2804	12	57	12	1	403	47.2	8.66	High	High	High	High	High	High	Medium	Not Found		0	2.535	215.56	12
High	Master Protein	G7J4F9	Light-harvesting complex I chlorophyll A/B-binding protein OS=Medicago truncatula GN=MTR_3g088040 PE=2 SV=1	0	46.194	29.2593	6	28	6	1	270	28.9	6.77	High	High	High	High	High	High	Not Found	Not Found		0	3.642	106.08	6
High	Master Protein	Q2HVG1	Mitochondrial pyruvate carrier OS=Medicago truncatula GN=MTR_2g025480 PE=2 SV=1	0	12.462	29.2453	3	10	3	1	106	11.9	9.79	High	High	High	High	Not Found	High	High	High		0	2.162	34.8	3
High	Master Protein	Q2HWC2	40S ribosomal protein S28-1 OS=Medicago truncatula GN=MTR_6g013210 PE=2 SV=2	0	6.316	29.2308	2	4	2	1	65	7.5	11.17	Not Found	Not Found	Not Found	High	High	High	High	Not Found		0	2.162	14.38	2
High	Master Protein	G7LGX8	Syntaxin of plants protein OS=Medicago truncatula GN=MTR_8g066340 PE=3 SV=1	0	35.345	29.1971	6	15	4	1	274	30.1	6.32	Not Found	High	High	High	High	High	High	High		0	1.738	58	6
High	Master Protein	B7FGV4	Rhodanese-related sulfurtransferase OS=Medicago truncatula GN=MTR_5g023170 PE=2 SV=1	0	18.155	29.1892	4	7	4	1	185	20.2	9.26	Not Found	High	High	High	High	Not Found	Not Found	Not Found		0	2.162	27.89	4
High	Master Protein	A0A072TZD1	LRR receptor-like kinase OS=Medicago truncatula GN=MTR_8g031030 PE=4 SV=1	0	58.487	29.1242	12	21	3	1	491	55.2	6.23	Not Found	Not Found	High	Not Found	High	High	Not Found	Not Found		0	1.154	80.37	12
High	Master Protein	G7J036	Syntaxin of plants protein OS=Medicago truncatula GN=MTR_3g055200 PE=4 SV=2	0	34.64	29.1188	7	18	7	1	261	28.9	8.15	High	High	High	High	High	High	High	Not Found	Deamidated [Q164; R165]	0	1.848	54.64	7
High	Master Protein	B7FI20	Syntaxin of plants 122 protein OS=Medicago truncatula GN=MTR_1g056550 PE=2 SV=1	0	59.006	29.085	8	14	8	1	306	34.8	8.51	Not Found	Not Found	High	High	High	High	High	High	Phospho [S8]	1	2.511	62.43	8
High	Master Protein	A0A072VI87	Translocase of outer membrane complex, subunit TOM22 OS=Medicago truncatula GN=MTR_1g045505 PE=4 SV=1	0	16.859	29.0698	1	6	1	1	86	9.1	9.72	Not Found	Not Found	High	High	High	Not Found	Not Found	Not Found		0	1.512	44.24	1
High	Master Protein	A0A072VP26	Aspartate aminotransferase OS=Medicago truncatula GN=MTR_1g013050 PE=4 SV=1	0	51.765	29.0323	12	15	12	1	465	50.9	8.16	High	High	High	High	High	Not Found	Not Found	Not Found		0	1.548	52.83	12
High	Master Protein	G7LBD3	Small nuclear ribonucleoprotein OS=Medicago truncatula GN=MTR_8g092200 PE=2 SV=1	0	13.756	29.0076	4	6	4	1	131	14.3	10.42	Not Found	Not Found	High	High	High	Not Found	High	Not Found		0	1.783	18.81	4
High	Master Protein	G7JAE0	Rpp20 subunit of nuclear RNase MRP and P protein OS=Medicago truncatula GN=MTR_3g095260 PE=4 SV=2	0	27.576	28.9796	6	20	1	1	245	27.1	10.1	Not Found	Not Found	High	High	Not Found	Not Found	Not Found	Not Found		0	2.511	67.51	6
High	Master Protein	G7JB62	Major intrinsic protein (MIP) family transporter OS=Medicago truncatula GN=MTR_3g070210 PE=3 SV=1	0	63.763	28.9655	8	27	6	1	290	31	8.53	High	High	High	High	High	High	High	Not Found	Deamidated [Q6]; Phospho [S9]	1	9	108.6	8
High	Master Protein	G7JBK8	Cyanobacterial and plant NDH-1 subunit O OS=Medicago truncatula GN=MTR_3g096290 PE=4 SV=1	0	29.385	28.9308	4	8	4	1	159	17.7	9	High	High	Not Found	Not Found	High	High	High	High		0	3.217	32.18	4
High	Master Protein	G7L3V5	ATPase, AAA-type, CDC48 protein OS=Medicago truncatula GN=MTR_7g101870 PE=4 SV=2	0	130.281	28.9246	23	46	5	1	809	89.7	5.29	Not Found	High	High	Not Found	Not Found	High	High	Not Found	Deamidated [R197; R202]	0	3.062	171.99	23
High	Master Protein	G7IJ13	Proteasome subunit alpha type OS=Medicago truncatula GN=MTR_2g060830 PE=2 SV=1	0	21.925	28.8618	6	7	2	1	246	27.2	6.02	Not Found	Not Found	Not Found	High	High	Not Found	Not Found	Not Found	Deamidated [Q173]	0	0.778	23.63	6
High	Master Protein	G7J3X9	General regulatory factor 2 OS=Medicago truncatula GN=MTR_3g099380 PE=3 SV=2	0	43.817	28.8462	8	25	1	1	260	29.3	4.79	Not Found	Not Found	Not Found	Not Found	Not Found	Not Found	High	Not Found		0	2.548	79.63	8
High	Master Protein	A0A072VQS8	Small GTPase family RAB protein OS=Medicago truncatula GN=MTR_1g029450 PE=4 SV=1	0	35.681	28.8372	6	13	6	1	215	24	5.85	High	High	High	High	High	Not Found	High	Not Found		0	2.162	52.42	6
High	Master Protein	A0A072VB00	Ubiquitin-conjugating enzyme OS=Medicago truncatula GN=MTR_2g078010 PE=3 SV=1	0	12.33	28.7582	3	7	3	1	153	17.2	6.57	High	High	High	High	High	High	Not Found	Not Found		0	0.995	25.48	3
High	Master Protein	G7KY60	Non-green plastid inner envelope membrane protein OS=Medicago truncatula GN=MTR_7g073340 PE=2 SV=2	0	68.895	28.7097	8	19	8	1	310	33.8	6.62	High	High	Not Found	High	High	High	High	Not Found		0	1.994	94.88	8
High	Master Protein	A0A072U0M2	ICE-like protease (Caspase) p20 domain protein OS=Medicago truncatula GN=MTR_8g447080 PE=4 SV=1	0	49.747	28.6408	8	16	8	1	412	44.9	5.11	High	High	High	High	High	High	High	High		0	1.512	68.01	8
High	Master Protein	G7II77	Pti1-like kinase OS=Medicago truncatula GN=MTR_2g103950 PE=3 SV=1	0	79.33	28.6104	11	23	10	1	367	41	6.25	Not Found	High	High	High	High	High	High	Not Found		0	2.899	97.1	11
High	Master Protein	A0A072VTY6	Calmodulin-domain kinase CDPK protein OS=Medicago truncatula GN=MTR_1g052530 PE=4 SV=1	0	55.842	28.5985	13	27	8	1	528	60.1	6.61	High	High	Not Found	High	High	High	High	Not Found		0	1.371	91.98	13
High	Master Protein	B7FMQ6	60S ribosomal L23-like protein OS=Medicago truncatula GN=MTR_1g069585 PE=2 SV=1	0	17.128	28.5714	5	11	5	1	140	15	10.48	High	High	High	High	High	Not Found	Not Found	Not Found		0	2.162	34.41	5
High	Master Protein	G7KWY5	2Fe-2S ferredoxin-like protein OS=Medicago truncatula GN=MTR_7g051230 PE=4 SV=1	0	12.427	28.5714	3	7	3	1	154	17.2	7.85	High	High	High	High	Not Found	Not Found	Not Found	Not Found		0	1.31	24.4	3
High	Master Protein	A0A072V484	Heat shock 70 kDa protein OS=Medicago truncatula GN=MTR_2g010020 PE=3 SV=1	0	65.489	28.5081	18	32	7	1	677	72.5	5.68	High	High	High	High	High	High	High	Not Found		0	1.848	97.17	18
High	Master Protein	G7ID69	Photosystem I reaction center subunit II OS=Medicago truncatula GN=MTR_1g104630 PE=4 SV=1	0	33.759	28.4974	7	34	1	1	193	21.5	9.09	Not Found	Not Found	Not Found	Not Found	High	Not Found	Not Found	Not Found	Deamidated [Q93; Q136; R139; Q147]; Carboxymethyl [K152]	0	11.328	105.2	7
High	Master Protein	A0A072UET3	60S ribosomal protein L35a-3 OS=Medicago truncatula GN=MTR_5g081705 PE=4 SV=1	0	17.782	28.4672	3	7	3	1	137	15.8	10.64	Not Found	High	High	High	High	High	Not Found	Not Found		0	1.154	32.8	3
High	Master Protein	G7JBF4	Nuclear transport factor 2 OS=Medicago truncatula GN=MTR_3g085070 PE=2 SV=1	0	10.973	28.4553	2	5	2	1	123	13.8	6.34	Not Found	High	High	Not Found	Not Found	Medium	Not Found	Not Found		0	1.683	25.53	2
High	Master Protein	G7JST7	Transmembrane protein, putative OS=Medicago truncatula GN=MTR_4g078130 PE=4 SV=1	0	24.527	28.4047	6	13	6	1	257	27.9	6.7	High	High	High	High	High	High	High	Not Found		0	2.162	47.57	6
High	Master Protein	A0A072U1J9	Transmembrane protein, putative OS=Medicago truncatula GN=MTR_7g074090 PE=4 SV=1	0	52.377	28.3887	9	27	7	1	391	42	9.07	High	High	High	High	High	High	Not Found	High		0	2.311	101.36	9
High	Master Protein	G7J9B8	Glutamine synthetase OS=Medicago truncatula GN=MTR_3g065250 PE=3 SV=1	0	33.129	28.3708	7	11	6	1	356	39.1	5.59	High	High	High	High	High	High	Not Found	Not Found		0	1.336	46.48	7
High	Master Protein	G7J5D7	Glutaredoxin C1 OS=Medicago truncatula GN=MTR_3g077560 PE=4 SV=1	0	28.278	28.3465	2	6	2	1	127	13.7	7.88	High	High	High	High	High	Not Found	Not Found	Not Found		0	1.783	24.72	2
High	Master Protein	Q93YX8	Phosphoinositide phospholipase C OS=Medicago truncatula GN=PLC1 PE=4 SV=1	0	60.118	28.3305	18	42	5	1	593	67.4	6.37	High	High	High	High	Not Found	High	Not Found	Not Found		0	2.075	129.98	18
High	Master Protein	A0A072V8W6	Cytochrome P450 family 709 protein OS=Medicago truncatula GN=MTR_2g072250 PE=3 SV=1	0	80.341	28.2946	17	36	14	1	516	59.4	8.85	High	High	High	High	High	High	High	High	Deamidated [R283; R295]	0	3.85	120.73	17
High	Master Protein	G7KJE1	Cytochrome P450 family 82 protein OS=Medicago truncatula GN=MTR_6g008500 PE=3 SV=1	0	95.958	28.281	18	45	17	1	541	61.6	7.74	High	High	High	High	High	High	High	Not Found		0	3.85	159.05	18
High	Master Protein	I3TAJ6	NAD(P)-binding rossmann-fold protein OS=Medicago truncatula GN=MTR_7g062140 PE=2 SV=1	0	39.661	28.2675	6	8	6	1	329	35.7	8.87	High	High	Not Found	High	High	High	Not Found	Not Found		0	1.081	31.68	6
High	Master Protein	Q84RD8	Adenosylhomocysteinase OS=Medicago truncatula GN=AHC2 PE=3 SV=1	0	67.009	28.2474	18	42	11	1	485	53.2	6.01	High	High	High	High	High	High	High	Not Found	Deamidated [R212; Q215; Q217]	0	3.758	130.95	18
High	Master Protein	G7KG97	Thylakoid lumenal protein OS=Medicago truncatula GN=MTR_5g012110 PE=4 SV=1	0	25.346	28.2443	5	8	5	1	262	27.9	6.9	Not Found	Not Found	Not Found	High	High	High	Not Found	Medium		0	0.968	33.83	5
High	Master Protein	G7LDG5	Malic enzyme OS=Medicago truncatula GN=MTR_8g009500 PE=3 SV=1	0	78.624	28.1847	15	21	15	1	628	70	5.87	High	High	High	High	High	High	High	Not Found		0	1.572	78.25	15
High	Master Protein	G7K9G6	Thioredoxin-like protein OS=Medicago truncatula GN=MTR_5g018580 PE=4 SV=2	0	48.335	28.125	7	16	7	1	288	32.4	6.74	High	High	High	High	High	High	High	High		0	1.637	65.78	7
High	Master Protein	G7L728	Transmembrane protein, putative OS=Medicago truncatula GN=MTR_8g070680 PE=2 SV=1	0	68.971	28.0899	12	24	12	1	267	29.6	4.6	High	High	High	High	High	High	High	Not Found		0	14.199	99.96	12
High	Master Protein	A0A072TMC9	Starch synthase, chloroplastic/amyloplastic OS=Medicago truncatula GN=MTR_8g024340 PE=3 SV=1	0	62.301	28.0844	12	15	12	1	616	67.8	8.38	High	High	High	High	High	High	High	Not Found		0	1.031	62.25	12
High	Master Protein	G7L4P7	Uncharacterized protein OS=Medicago truncatula GN=MTR_7g077860 PE=4 SV=1	0	31.012	28.0757	6	7	6	1	317	35.2	4.72	Not Found	Not Found	Not Found	High	High	High	High	High		0	1.069	34.1	6
High	Master Protein	A0A072V0J2	Protein disulfide-isomerase OS=Medicago truncatula GN=MTR_3g088220 PE=3 SV=1	0	46.222	28.0702	11	15	11	1	513	57	5.1	High	High	High	High	High	High	High	Not Found		0	1.202	51.49	11
High	Master Protein	A0A072U3B3	Harpin-induced-like protein OS=Medicago truncatula GN=MTR_7g105870 PE=4 SV=1	0	22.481	28.0702	5	7	5	1	228	25.8	9.33	Not Found	High	High	High	High	Not Found	High	Not Found		0	1.424	29.17	5
High	Master Protein	B7FFA9	Transmembrane protein 14C OS=Medicago truncatula GN=MTR_4g123593 PE=2 SV=1	0	20.531	28.0702	3	8	3	1	228	22.9	7.58	High	High	High	High	High	High	Not Found	Not Found		0	1.154	41.62	3
High	Master Protein	G7KH12	Phosphoinositide phospholipase C OS=Medicago truncatula GN=MTR_5g082620 PE=4 SV=1	0	72.468	28.0136	15	32	13	1	589	66.9	6.54	High	High	High	High	High	High	Not Found	Not Found		0	2.262	115.91	15
High	Master Protein	G7LAF4	Inner membrane protein OS=Medicago truncatula GN=MTR_8g091480 PE=3 SV=2	0	120.981	28.0105	14	31	14	1	764	84.5	5.94	High	High	High	High	High	High	High	High	Deamidated [Q539]	0	1.512	142.85	14
High	Master Protein	G7L9N5	RPM1-interacting protein 4 (RIN4) family protein OS=Medicago truncatula GN=MTR_8g089560 PE=4 SV=1	0	9.467	28	1	2	1	1	75	8.4	9.76	Not Found	High	High	Not Found	Not Found	Not Found	Not Found	Not Found		0	0.778	12.99	1
High	Master Protein	G7JLX3	Transmembrane protein, putative OS=Medicago truncatula GN=MTR_4g015010 PE=4 SV=1	0	98.072	28	13	39	11	1	275	31	4.93	High	High	High	High	High	High	High	Not Found		0	12.594	153.21	13
High	Master Protein	A0A072UDP2	Legumin A2 OS=Medicago truncatula GN=MTR_7g096990 PE=4 SV=1	0	112.665	28	12	48	4	1	525	60.4	6.96	High	High	High	High	High	Not Found	Not Found	Not Found	Deamidated [Q249]	0	3.52	198.89	12
High	Master Protein	A0A072U0Q0	Fasciclin-like arabinogalactan protein OS=Medicago truncatula GN=MTR_7g075453 PE=4 SV=1	0	58.322	27.9904	10	22	10	1	418	42.9	6.3	High	High	High	High	High	Medium	Not Found	Not Found		0	3.084	85.72	10
High	Master Protein	I3S100	NADH-ubiquinone oxidoreductase B16.6 subunit OS=Medicago truncatula GN=MTR_1g046380 PE=2 SV=1	0	24.057	27.972	6	19	6	1	143	16.2	9.23	High	High	High	High	High	High	High	Not Found	Deamidated [R129]	0	4.995	64.86	6
High	Master Protein	A0A072UT55	40S ribosomal protein S19-1 OS=Medicago truncatula GN=MTR_3g013635 PE=4 SV=1	0	16.426	27.972	4	8	2	1	143	16	10.15	Not Found	Not Found	Not Found	Not Found	High	High	Not Found	Not Found		0	1.61	22.61	4
High	Master Protein	A0A072VFT5	Protein ROOT HAIR DEFECTIVE 3 homolog OS=Medicago truncatula GN=MTR_2g029340 PE=3 SV=1	0	109.666	27.9712	20	51	19	1	833	93	5.67	High	High	High	High	High	High	High	High	Deamidated [Q392; R405; R564]	0	2.467	178.92	20
High	Master Protein	G7IJ44	Photosystem II 10 kDa proteinPsbR protein OS=Medicago truncatula GN=MTR_2g064650 PE=2 SV=1	0	30.243	27.9412	5	38	5	1	136	14.1	9.67	High	High	High	High	High	High	High	High	Phospho [T51]	1	9	118.66	5
High	Master Protein	A0A072U5E1	Plasma membrane ATPase OS=Medicago truncatula GN=MTR_6g011310 PE=3 SV=1	0	140.112	27.9289	28	82	9	1	956	105.4	6.68	High	High	High	High	High	High	High	Not Found	Phospho [T955]	1	2.884	277.64	28
High	Master Protein	G7JEX0	Membrane-associated 30 kDa protein OS=Medicago truncatula GN=MTR_4g068210 PE=2 SV=1	0	49.654	27.8997	9	15	9	1	319	35.1	9.5	High	High	High	High	High	High	High	Not Found		0	1.683	67.85	9
High	Master Protein	B7FLC5	26S proteasome regulatory subunit N5 OS=Medicago truncatula GN=MTR_8g092450 PE=2 SV=1	0	46.642	27.8912	10	18	10	1	441	50.6	6.87	High	High	High	High	High	High	High	Not Found		0	1.264	62.4	10
High	Master Protein	A0A072TD20	RAB GTPase-like protein G3A (Fragment) OS=Medicago truncatula GN=MTR_1452s0010 PE=4 SV=1	0	21.596	27.8846	3	7	2	1	104	12.2	5.39	Not Found	Not Found	High	High	High	Not Found	Not Found	Not Found	Carboxymethyl [K67]	0	2.162	32.8	3
High	Master Protein	A0A072UKP4	NADH-ubiquinone oxidoreductase, putative OS=Medicago truncatula GN=MTR_6g053280 PE=4 SV=1	0	28.088	27.881	7	21	7	1	269	30.7	6.86	High	High	High	High	High	High	High	High		0	1.637	60.87	7
High	Master Protein	G7K6R8	Ubiquinol oxidase OS=Medicago truncatula GN=MTR_5g026620 PE=3 SV=1	0	56.162	27.8788	8	15	6	1	330	37.7	8.63	High	High	High	High	High	High	Not Found	Not Found		0	2.008	65.19	8
High	Master Protein	G7LBA5	60S ribosomal L6-like protein OS=Medicago truncatula GN=MTR_8g091910 PE=4 SV=1	0	15.507	27.8539	6	9	4	1	219	24.4	10.08	Not Found	Medium	Not Found	Not Found	High	High	High	Not Found		0	1.276	19.18	6
High	Master Protein	G7I9L4	26S proteasome regulatory complex protein OS=Medicago truncatula GN=MTR_1g095660 PE=3 SV=2	0	56.332	27.7922	10	20	1	1	385	43	7.49	Not Found	Not Found	Not Found	Not Found	High	High	Not Found	Not Found		0	2.03	61	10
High	Master Protein	Q2HUB9	Signal peptidase I OS=Medicago truncatula GN=MTR_2g103570 PE=3 SV=1	0	11.895	27.7778	5	14	5	1	180	19.9	7.61	Medium	High	High	High	High	Not Found	Not Found	Not Found		0	2.455	31.94	5
High	Master Protein	G7IH96	General regulatory factor 2 OS=Medicago truncatula GN=MTR_2g076960 PE=3 SV=1	0	46.2	27.7567	8	15	6	1	263	30.1	4.84	Not Found	High	High	Not Found	High	High	High	Not Found		0	1.976	47.62	8
High	Master Protein	B7FI29	Synaptobrevin-like protein OS=Medicago truncatula GN=MTR_4g052550 PE=2 SV=1	0	19.826	27.7273	8	28	5	1	220	25.2	9.03	Not Found	High	High	High	High	High	Medium	Not Found		0	2.875	79.72	8
High	Master Protein	B7FMG6	60S ribosomal protein L13a-4 OS=Medicago truncatula GN=MTR_1g023590 PE=2 SV=1	0	18.144	27.6699	8	21	1	1	206	23.4	10.24	Not Found	High	High	Not Found	Not Found	Not Found	Not Found	Not Found		0	3.642	58.08	8
High	Master Protein	G7K7C0	60S ribosomal protein L13a-4 OS=Medicago truncatula GN=MTR_5g083790 PE=3 SV=1	0	18.777	27.6699	8	20	1	1	206	23.7	10.24	Not Found	Not Found	High	Not Found	Not Found	Not Found	Not Found	Not Found		0	3.125	54.95	8
High	Master Protein	A0A072TK26	RAB GTPase-like protein A5D OS=Medicago truncatula GN=MTR_8g006970 PE=4 SV=1	0	15.115	27.6498	5	17	3	1	217	24	6.57	High	High	High	High	High	High	High	Not Found		0	1.069	31.96	5
High	Master Protein	G7KFM2	Peroxidase OS=Medicago truncatula GN=MTR_5g074970 PE=3 SV=1	0	31.605	27.6074	7	8	7	1	326	35.8	9.29	High	Not Found	High	High	High	Not Found	Not Found	Not Found		0	1.512	32.87	7
High	Master Protein	A2Q5N9	Galactose mutarotase-like OS=Medicago truncatula GN=MTR_7g085490 PE=4 SV=1	0	30.055	27.6056	9	19	9	1	355	39.2	7.84	High	High	High	High	High	High	High	Not Found		0	1.848	54.77	9
High	Master Protein	G7IN02	Plasma membrane ATPase OS=Medicago truncatula GN=MTR_2g036650 PE=3 SV=1	0	116.211	27.5574	28	89	5	1	958	105.5	6.98	High	High	High	High	High	Medium	Not Found	Not Found	Deamidated [Q522]	0	2.391	269.07	28
High	Master Protein	A0A072U613	Sucrase/ferredoxin family protein OS=Medicago truncatula GN=MTR_6g004780 PE=4 SV=1	0	42.254	27.5568	9	22	9	1	352	38.5	6.54	High	High	High	High	High	High	High	Not Found		0	2.481	80.29	9
High	Master Protein	G7IBS1	Receptor-like kinase OS=Medicago truncatula GN=MTR_1g086230 PE=3 SV=1	0	48.366	27.521	11	24	8	1	476	52	8	High	High	High	High	High	High	Not Found	Not Found		0	1.371	74.76	11
High	Master Protein	G7IZC1	Plant/F13G24-250 protein OS=Medicago truncatula GN=MTR_3g026020 PE=4 SV=2	0	25.801	27.5132	5	22	5	1	189	19.8	9.44	High	High	High	High	High	High	Not Found	High		0	9	64.51	5
High	Master Protein	A0A072VCX2	Aspartate aminotransferase OS=Medicago truncatula GN=MTR_3g110065 PE=4 SV=1	0	81.255	27.5109	10	21	10	1	458	50.2	8.44	High	High	High	High	High	High	Not Found	Not Found		0	1.943	85.08	10
High	Master Protein	A0A072UZG4	Eukaryotic translation initiation factor 2 subunit beta OS=Medicago truncatula GN=MTR_3g467620 PE=4 SV=1	0	29.179	27.5093	6	7	4	1	269	30.2	6.8	Not Found	Not Found	Not Found	High	High	High	High	Not Found		0	1.069	27.59	6
High	Master Protein	G7JNP1	Uncharacterized protein OS=Medicago truncatula GN=MTR_4g087540 PE=2 SV=1	0	15.519	27.5	3	6	3	1	160	17.2	10.18	Not Found	Not Found	High	High	High	Not Found	High	Not Found		0	1.783	27.96	3
High	Master Protein	G7L8T3	Guanosine nucleotide diphosphate dissociation inhibitor OS=Medicago truncatula GN=MTR_8g088620 PE=2 SV=1	0	66.102	27.4775	10	16	10	1	444	49.7	5.88	High	High	High	High	High	High	High	Not Found		0	1.754	65.45	10
High	Master Protein	A0A072V6F8	Acyl-CoA dehydrogenase OS=Medicago truncatula GN=MTR_2g436030 PE=4 SV=1	0	40.775	27.4131	5	11	5	1	259	28.5	10.3	Not Found	High	High	High	High	High	High	Not Found		0	1.683	44.25	5
High	Master Protein	G7J636	NADH-cytochrome b5 reductase OS=Medicago truncatula GN=MTR_3g079510 PE=3 SV=1	0	35.293	27.3381	7	20	7	1	278	31.3	8.1	High	High	High	High	High	High	High	Not Found		0	1.976	67.42	7
High	Master Protein	B7FI95	Polyadenylate-binding protein II OS=Medicago truncatula GN=MTR_1g073000 PE=2 SV=1	0	20.545	27.2727	3	3	3	1	187	20.9	4.64	Not Found	Not Found	Not Found	Not Found	Not Found	Not Found	High	Not Found		0	0.995	15.33	3
High	Master Protein	A0A072TM25	Patatin OS=Medicago truncatula GN=MTR_8g007065 PE=3 SV=1	0	80.456	27.2512	11	34	11	1	422	45.9	5.03	High	High	High	High	High	High	High	Not Found		0	3.786	122.86	11
High	Master Protein	G7J9A2	NAD-dependent epimerase/dehydratase family protein OS=Medicago truncatula GN=MTR_3g118430 PE=4 SV=2	0	51.987	27.2265	12	24	12	1	393	43.8	8.85	High	High	High	High	High	Medium	High	Not Found		0	1.894	75.7	12
High	Master Protein	B7FM34	Light-harvesting complex I chlorophyll A/B-binding protein OS=Medicago truncatula GN=MTR_1g115740 PE=2 SV=1	0	10.638	27.2251	3	8	3	1	191	20.6	9.82	High	High	High	High	High	High	Not Found	Not Found		0	0.995	23.16	3
High	Master Protein	A2Q593	Photosystem I iron-sulfur center OS=Medicago truncatula GN=psaC PE=3 SV=1	0	5.86	27.1605	3	9	1	1	81	8.9	6.92	High	Not Found	Not Found	Not Found	Not Found	Not Found	Not Found	Not Found		0	1.683	20.86	3
High	Master Protein	G7KKZ4	Vesicle transport V-SNARE protein amino-terminal protein OS=Medicago truncatula GN=MTR_6g012860 PE=2 SV=1	0	45.498	27.1493	5	15	4	1	221	24.8	9.41	High	High	High	High	High	High	High	Not Found		0	2.831	71.98	5
High	Master Protein	A0A072UHR4	Thylakoid membrane slr0575-like protein OS=Medicago truncatula GN=MTR_6g017260 PE=4 SV=1	0	32.586	27.1429	6	16	6	1	280	30.6	7.81	High	High	High	Not Found	Medium	High	High	High		0	1.448	51.47	6
High	Master Protein	A0A072TFS9	ATP synthase F1, alpha subunit OS=Medicago truncatula GN=MTR_0212s0040 PE=3 SV=1	0	132.791	27.1028	24	116	21	1	856	93.2	5.21	High	High	High	High	High	High	High	High	Deamidated [Q188]	0	3.571	365.42	24
High	Master Protein	G7KNP7	Short-chain alcohol dehydrogenase OS=Medicago truncatula GN=MTR_6g023910 PE=4 SV=1	0	38.348	27.037	5	11	4	1	270	28.7	6.1	High	High	High	High	High	High	Not Found	Not Found		0	1.371	46.83	5
High	Master Protein	G7KGI9	Cinnamyl alcohol dehydrogenase family protein OS=Medicago truncatula GN=MTR_5g031360 PE=4 SV=1	0	52.369	26.9972	8	17	4	1	363	39	7.74	High	High	High	High	Not Found	Not Found	Not Found	Not Found		0	1.721	57.79	8
High	Master Protein	I3ST24	Fiber protein Fb11 OS=Medicago truncatula GN=MTR_7g117700 PE=2 SV=1	0	3.72	26.9841	1	4	1	1	63	6.8	8.21	Not Found	High	High	High	High	Not Found	Not Found	Not Found		0	2.162	16.84	1
High	Master Protein	A0A072TSK6	Porin/voltage-dependent anion-selective channel protein OS=Medicago truncatula GN=MTR_8g469150 PE=4 SV=1	0	34.394	26.9784	8	15	7	1	278	29.8	7.62	Not Found	High	High	High	High	High	Not Found	Not Found		0	5.813	45.54	8
High	Master Protein	A0A072URD4	RAB GTPase-like protein A2D OS=Medicago truncatula GN=MTR_4g099470 PE=4 SV=1	0	11.43	26.9663	4	11	2	1	178	19.7	5.4	High	High	Not Found	High	Not Found	High	High	Not Found		0	1.154	26.54	4
High	Master Protein	A0A072U201	Elongation factor Tu OS=Medicago truncatula GN=MTR_7g094460 PE=3 SV=1	0	42.911	26.9488	10	14	10	1	449	48.9	6.87	High	Medium	High	High	High	High	High	Not Found		0	1.054	38.95	10
High	Master Protein	B7FLI7	Acyl carrier protein OS=Medicago truncatula GN=MTR_7g080390 PE=2 SV=1	0	28.818	26.9231	2	6	2	1	130	14.7	5.54	High	High	Not Found	High	High	High	Not Found	Not Found		0	0.995	34.34	2
High	Master Protein	A0A072U5V1	Nucleoside diphosphate kinase OS=Medicago truncatula GN=MTR_8g099450 PE=3 SV=1	0	23.669	26.9231	5	7	5	1	234	25.4	8.7	Not Found	High	High	High	Not Found	High	Not Found	Not Found		0	0.968	23.4	5
High	Master Protein	I3S543	Peptidyl-prolyl cis-trans isomerase OS=Medicago truncatula GN=MTR_4g073650 PE=2 SV=1	0	33.206	26.9058	4	9	4	1	223	24.5	7.2	Not Found	Not Found	High	High	High	High	High	Not Found		0	1.054	40.14	4
High	Master Protein	G7IEJ2	Fumarate hydratase OS=Medicago truncatula GN=MTR_1g087900 PE=3 SV=1	0	51.725	26.8839	11	19	11	1	491	53.3	8.53	High	High	High	High	High	High	Not Found	Not Found		0	1.021	61.58	11
High	Master Protein	G7JLL1	Pathogenesis-related protein bet V I family protein OS=Medicago truncatula GN=MTR_4g120760 PE=2 SV=2	0	34.709	26.875	5	6	5	1	160	17.8	4.64	Medium	Not Found	Not Found	High	High	High	Not Found	Not Found		0	2.511	23.8	5
High	Master Protein	A0A072U7I8	Chlorophyll a-b binding protein, chloroplastic OS=Medicago truncatula GN=MTR_6g033320 PE=3 SV=1	0	48.001	26.8595	8	36	8	1	242	26.4	7.02	High	High	High	High	High	High	High	Not Found	Deamidated [R83]	0	11.589	119.08	8
High	Master Protein	G7JAJ0	Clathrin assembly plant-like protein, putative OS=Medicago truncatula GN=MTR_3g106900 PE=4 SV=2	0	52.635	26.8331	12	18	12	1	641	70.8	5.66	Not Found	High	High	High	High	High	High	Not Found		0	1.246	73.8	12
High	Master Protein	A0A072U3U4	Uncharacterized protein OS=Medicago truncatula GN=MTR_7g102930 PE=4 SV=1	0	5.999	26.8293	3	5	3	1	123	13.6	6.3	High	Not Found	High	High	Not Found	Not Found	Not Found	Not Found		0	1.371	12.45	3
High	Master Protein	G7KNM8	Short-chain alcohol dehydrogenase OS=Medicago truncatula GN=MTR_6g023610 PE=4 SV=1	0	39.993	26.7658	5	13	4	1	269	28.6	7.01	High	High	High	High	Not Found	High	Not Found	Not Found		0	1.448	52.94	5
High	Master Protein	Q2HW53	Ferredoxin-dependent glutamate synthase OS=Medicago truncatula GN=MTR_7g089970 PE=4 SV=1	0	216.535	26.737	37	89	37	1	1612	175.7	6.86	High	High	High	High	High	High	Medium	High	Deamidated [R322; Q1023]	0	2.162	354.47	37
High	Master Protein	G7KFE0	LRR receptor-like kinase OS=Medicago truncatula GN=MTR_5g098970 PE=4 SV=2	0	68.161	26.7176	11	32	11	1	524	59.4	7.01	High	High	High	High	High	High	High	High	Phospho [S364; T365]	2	1.955	118.13	11
High	Master Protein	G7IMH7	Cytochrome C oxidase subunit 5b OS=Medicago truncatula GN=MTR_2g103150 PE=2 SV=1	0	45.079	26.6667	5	13	5	1	150	16.5	6.35	Not Found	Not Found	High	High	High	High	Not Found	High		0	9	52.3	5
High	Master Protein	G7JVN6	UDP-glucose:sterol 3-O-glucosyltransferase OS=Medicago truncatula GN=MTR_4g022580 PE=4 SV=1	0	102.203	26.6453	13	33	8	1	623	68.4	6.46	High	High	High	High	High	High	Not Found	Not Found	Phospho [T133]	1	1.955	149.89	13
High	Master Protein	I3STV7	Derlin OS=Medicago truncatula GN=MTR_2g022890 PE=2 SV=1	0	13.144	26.6393	6	11	6	1	244	28.1	8.68	Not Found	High	High	High	High	High	Not Found	Not Found		0	1.448	27.78	6
High	Master Protein	A0A072THP7	Cell number regulator-like protein OS=Medicago truncatula GN=MTR_0172s0050 PE=4 SV=1	0	16.935	26.6393	4	5	4	1	244	27.4	5.08	Not Found	Not Found	Not Found	High	High	Not Found	High	Not Found		0	1.31	21.92	4
High	Master Protein	G7JEW8	Peptidylprolyl isomerase OS=Medicago truncatula GN=MTR_4g068190 PE=2 SV=2	0	17.734	26.6376	5	8	5	1	229	24.5	7.06	High	High	High	High	High	High	Not Found	Not Found		0	1.154	22.12	5
High	Master Protein	A0A072VFQ6	ATP-dependent zinc metalloprotease FTSH protein OS=Medicago truncatula GN=MTR_1g028390 PE=3 SV=1	0	76.521	26.6067	16	31	15	1	778	85.7	6.64	High	High	High	High	High	High	High	Not Found		0	1.415	119.46	16
High	Master Protein	I3SK73	Perchloric acid soluble translation inhibitor-like protein OS=Medicago truncatula GN=MTR_3g051740 PE=2 SV=1	0	12.084	26.5957	3	5	3	1	188	20	8.82	Not Found	High	High	Not Found	High	High	High	Not Found		0	0.585	19.51	3
High	Master Protein	G7JWJ8	Vesicle transport V-SNARE protein amino-terminal protein OS=Medicago truncatula GN=MTR_5g042530 PE=4 SV=1	0	24.706	26.5766	5	5	5	1	222	25.4	8.92	Not Found	Not Found	Not Found	Not Found	High	High	Not Found	Not Found		0	1.276	21.58	5
High	Master Protein	G7JLT3	Uncharacterized protein OS=Medicago truncatula GN=MTR_4g014600 PE=4 SV=1	0	97.43	26.5625	19	49	19	1	512	60	8.69	High	High	High	High	High	High	High	Not Found	Deamidated [Q109]	0	6.88	192.78	19
High	Master Protein	A0A072UKG0	Histone H2B OS=Medicago truncatula GN=MTR_4g064983 PE=3 SV=1	0	16.222	26.556	6	22	6	1	241	25.9	9.23	High	High	High	High	High	High	Not Found	Not Found		0	1.738	59.76	6
High	Master Protein	G7K7D0	Uncharacterized protein OS=Medicago truncatula GN=MTR_5g084410 PE=2 SV=1	0	8.676	26.5487	1	1	1	1	113	11.6	5.03	Not Found	Not Found	Not Found	Not Found	Not Found	Not Found	High	Not Found		0	0.585	8.2	1
High	Master Protein	G7KPG2	Type II peroxiredoxin OS=Medicago truncatula GN=MTR_6g087990 PE=2 SV=1	0	13.667	26.5432	2	3	2	1	162	17.5	5.87	High	High	High	Not Found	Not Found	Not Found	Not Found	Not Found		0	0.668	15.73	2
High	Master Protein	B7FHE2	Vesicle transport protein OS=Medicago truncatula GN=MTR_1g026920 PE=2 SV=1	0	13.447	26.5432	2	4	2	1	162	17.7	5.14	High	Not Found	Not Found	High	High	High	Not Found	Not Found		0	0.778	25.05	2
High	Master Protein	G7KGI7	Cinnamyl alcohol dehydrogenase-like protein OS=Medicago truncatula GN=MTR_5g031310 PE=4 SV=1	0	44.563	26.5193	8	13	4	1	362	38.9	6.09	High	High	Not Found	Not Found	Not Found	Not Found	Not Found	Not Found		0	1.976	41.61	8
High	Master Protein	A0A072TNQ4	Mechanosensitive ion channel protein MscS OS=Medicago truncatula GN=MTR_8g028760 PE=4 SV=1	0	73.788	26.4599	11	24	11	1	548	59.4	9.01	High	High	High	High	High	High	High	Not Found		0	1.412	100.52	11
High	Master Protein	G7JK55	Elongation factor G, chloroplastic OS=Medicago truncatula GN=MTR_4g101750 PE=3 SV=1	0	104.634	26.4442	19	28	19	1	779	86	5.66	High	High	High	High	High	High	High	Not Found		0	1.649	113.77	19
High	Master Protein	A0A072VAA5	Succinate-semialdehyde dehydrogenase OS=Medicago truncatula GN=MTR_2g067660 PE=3 SV=1	0	67.447	26.4368	9	11	9	1	522	55.8	6.92	High	High	High	Not Found	High	Not Found	High	Not Found		0	1.102	55.66	9
High	Master Protein	G7J977	Phytochrome-associated protein phosphatase type 2C OS=Medicago truncatula GN=MTR_3g105730 PE=3 SV=1	0	37.595	26.4214	7	11	7	1	299	32.3	5.3	Not Found	High	High	High	Not Found	High	High	Not Found		0	1.462	37.15	7
High	Master Protein	A0A072U5B9	Ferredoxin-thioredoxin reductase catalytic chain OS=Medicago truncatula GN=MTR_6g008220 PE=4 SV=1	0	11.795	26.3889	3	5	3	1	144	16	7.23	Not Found	Not Found	High	High	High	Not Found	Not Found	Not Found		0	0.874	17.42	3
High	Master Protein	A2Q335	Histone H2A OS=Medicago truncatula GN=MTR_7g113160 PE=3 SV=1	0	4.493	26.3889	2	5	1	1	144	15.2	10.42	Not Found	Not Found	Not Found	Not Found	High	Not Found	Not Found	High		0	0.778	14.1	2
High	Master Protein	G7JM88	Lethal leaf-spot protein, putative OS=Medicago truncatula GN=MTR_4g057200 PE=4 SV=1	0	91.832	26.3838	14	53	13	1	542	61.1	8	High	High	High	High	High	High	High	Not Found		0	2.162	199.87	14
High	Master Protein	A0A072VHI1	GroES chaperonin OS=Medicago truncatula GN=MTR_2g043230 PE=3 SV=1	0	33.204	26.378	5	14	5	1	254	27.2	9.03	High	High	High	High	High	Not Found	Medium	Not Found		0	1.929	64.8	5
High	Master Protein	A0A072VLV1	Plant/MNJ8-150 protein OS=Medicago truncatula GN=MTR_1g079763 PE=4 SV=1	0	22.029	26.3666	6	10	6	1	311	33.4	8.75	High	Not Found	High	High	High	High	Not Found	Not Found		0	1.371	34.1	6
High	Master Protein	G7JYR0	Prolyl 4-hydroxylase alpha-like protein OS=Medicago truncatula GN=MTR_5g022960 PE=4 SV=1	0	33.467	26.2976	5	10	4	1	289	32.7	7.88	Not Found	High	High	High	High	High	Not Found	Not Found		0	1.683	43.01	5
High	Master Protein	I3SRV2	Membrane-anchored ubiquitin-fold protein 4 OS=Medicago truncatula GN=MTR_8g096380 PE=2 SV=1	0	4.141	26.2712	3	7	3	1	118	12.9	8.84	High	High	High	Medium	High	Not Found	Not Found	Not Found		0	0.778	17.75	3
High	Master Protein	G7JEF1	Vacuolar ATP synthase subunit D, putative OS=Medicago truncatula GN=MTR_4g007030 PE=4 SV=1	0	39.036	26.2548	6	12	6	1	259	29	9.58	High	High	Medium	High	High	High	Not Found	Not Found		0	1.976	51.31	6
High	Master Protein	S4SZ39	Photosystem I P700 chlorophyll a apoprotein A1 OS=Medicago truncatula GN=psaA PE=3 SV=1	0	128.426	26.2533	25	162	3	1	758	84.2	7.42	High	High	High	High	Not Found	Not Found	High	High	Deamidated [Q197; Q474]	0	10.253	410.32	25
High	Master Protein	B7FHD5	Thylakoid lumenal 17.4 kDa protein OS=Medicago truncatula GN=MTR_3g491890 PE=2 SV=1	0	39.578	26.25	5	7	5	1	240	25.6	7.9	High	High	High	High	High	Not Found	Not Found	Not Found	Deamidated [Q107]	0	1.254	40.98	5
High	Master Protein	G7KFV7	Isocitrate dehydrogenase [NADP] OS=Medicago truncatula GN=MTR_5g077070 PE=3 SV=1	0	36.374	26.2136	9	11	9	1	412	46	6.39	High	Not Found	High	High	High	High	High	Not Found		0	0.995	43.46	9
High	Master Protein	A0A072UGE8	Formate dehydrogenase, mitochondrial OS=Medicago truncatula GN=MTR_6g007170 PE=3 SV=1	0	49.775	26.1658	9	27	9	1	386	42.2	6.99	High	High	High	High	High	High	High	Not Found		0	1.754	86.43	9
High	Master Protein	Q2HV44	Major intrinsic protein OS=Medicago truncatula GN=MTR_7g101190 PE=3 SV=1	0	34.115	26.1324	7	28	5	1	287	30.6	8.41	High	High	High	High	High	High	High	Not Found		0	7.111	94.4	7
High	Master Protein	G7K0M1	Fasciclin-like arabinogalactan protein OS=Medicago truncatula GN=MTR_5g098420 PE=4 SV=1	0	53.209	26.1283	8	22	8	1	421	45.1	6.34	High	High	High	High	High	High	High	High		0	1.721	96.57	8
High	Master Protein	A0A072V195	ATP-dependent Clp protease ATP-binding subunit OS=Medicago truncatula GN=MTR_3g102830 PE=3 SV=1	0	120.886	26.1057	26	50	2	1	927	103	6.84	Not Found	Not Found	High	Not Found	Not Found	Not Found	High	Not Found		0	2.433	180.71	26
High	Master Protein	B7FHA8	Peptidyl-prolyl cis-trans isomerase OS=Medicago truncatula GN=MTR_1g094065 PE=2 SV=1	0	50.588	26.087	4	8	4	1	230	25.6	8.48	High	High	High	High	Not Found	High	High	Not Found		0	2.511	46.82	4
High	Master Protein	A0A072VRA4	50S ribosomal protein L15 OS=Medicago truncatula GN=MTR_1g110750 PE=3 SV=1	0	23.494	26.07	5	7	5	1	257	27.7	10.36	High	Not Found	Not Found	High	Not Found	High	High	Not Found		0	1.154	24.11	5
High	Master Protein	G7L912	CASP carboxy-terminal protein OS=Medicago truncatula GN=MTR_8g103950 PE=4 SV=1	0	92.037	26.0615	16	26	16	1	683	78.9	5.57	High	Not Found	High	High	High	High	High	High		0	1.125	95.1	16
High	Master Protein	G7ZWQ4	NADH dehydrogenase [ubiquinone] iron-sulfur protein OS=Medicago truncatula GN=MTR_8g010570 PE=3 SV=1	0	28.223	26.0331	7	13	7	1	242	27.9	5.43	High	High	High	High	High	High	Medium	Not Found	Deamidated [R226]	0	2.384	38.84	7
High	Master Protein	G7JYS0	Phospholipase D OS=Medicago truncatula GN=MTR_5g023050 PE=3 SV=2	0	144.79	26.0321	21	67	19	1	872	98.6	6.98	High	High	High	High	High	High	High	Not Found		0	2.3	283.64	21
High	Master Protein	A0A072VRP6	Calcium-binding EF hand-like protein OS=Medicago truncatula GN=MTR_1g115135 PE=4 SV=1	0	50.237	26.0163	8	21	8	1	369	43.4	5.06	High	High	High	High	High	High	Not Found	Not Found		0	2.981	72.39	8
High	Master Protein	I3SA84	Thioredoxin M-type protein OS=Medicago truncatula GN=MTR_2g079420 PE=2 SV=1	0	21.909	26.0116	5	11	3	1	173	19	9.16	High	Not Found	High	High	Not Found	High	High	Not Found		0	2.162	36.08	5
High	Master Protein	G7J9T0	Cytochrome b5-like heme/steroid-binding domain protein OS=Medicago truncatula GN=MTR_3g105860 PE=2 SV=1	0	9.708	26	2	3	2	1	100	10.8	5.15	Not Found	Not Found	Not Found	Not Found	High	High	High	Not Found		0	1.154	11.69	2
High	Master Protein	G7JHV6	Pyruvate orthophosphate dikinase OS=Medicago truncatula GN=MTR_4g118350 PE=4 SV=2	0	60.719	25.9615	12	16	12	1	624	68.3	7.83	High	Not Found	High	High	High	High	High	Medium		0	0.945	64.3	12
High	Master Protein	A0A072V1D7	Calmodulin-domain kinase CDPK protein OS=Medicago truncatula GN=MTR_4g107490 PE=4 SV=1	0	48.816	25.9459	12	22	9	1	555	63	6.81	High	High	Not Found	Medium	High	High	High	Not Found		0	1.543	78.4	12
High	Master Protein	G7JU14	Heat shock 70 kDa protein OS=Medicago truncatula GN=MTR_4g092920 PE=3 SV=1	0	65.517	25.9259	18	33	9	1	675	72.3	6.07	High	High	High	High	High	Not Found	Not Found	High		0	1.54	105.51	18
High	Master Protein	G7IN66	Translation elongation factor EF1B, gamma chain OS=Medicago truncatula GN=MTR_2g005570 PE=4 SV=1	0	50.028	25.8373	9	22	3	1	418	47.7	7.5	Not Found	Not Found	High	Not Found	High	High	High	Not Found		0	1.555	72.61	9
High	Master Protein	Q2HUA3	Phospholipase D OS=Medicago truncatula GN=MTR_2g103730 PE=3 SV=1	0	110.198	25.8344	18	45	17	1	809	92	5.8	High	High	High	High	High	High	High	Not Found		0	1.904	152.16	18
High	Master Protein	G7J568	Divalent cation tolerance protein, CutA1 family protein OS=Medicago truncatula GN=MTR_3g100630 PE=2 SV=2	0	17.408	25.8242	3	4	3	1	182	20.3	8.97	Not Found	High	High	High	Not Found	High	Not Found	Not Found		0	0.701	20.52	3
High	Master Protein	A0A072VBF8	Transmembrane protein, putative OS=Medicago truncatula GN=MTR_3g093690 PE=4 SV=1	0	72.626	25.788	10	32	10	1	349	39	9.76	High	High	High	High	High	High	High	Not Found		0	2.481	136.66	10
High	Master Protein	G7KF68	Cysteine-rich TM module stress tolerance protein OS=Medicago truncatula GN=MTR_5g030870 PE=4 SV=1	0	7.168	25.7576	1	5	1	1	66	7.2	4.61	High	High	High	High	Not Found	Not Found	Not Found	Not Found		0	3.642	19.73	1
High	Master Protein	G7KY52	Elongation factor P (EF-P), putative OS=Medicago truncatula GN=MTR_7g073250 PE=3 SV=1	0	26.307	25.7511	5	8	5	1	233	25.5	8.79	Not Found	Not Found	High	High	High	Not Found	High	Not Found		0	1.254	26.64	5
High	Master Protein	G7KF76	ATP synthase epsilon chain OS=Medicago truncatula GN=MTR_5g040610 PE=2 SV=1	0	5.382	25.7143	2	2	2	1	70	7.8	8.94	High	Not Found	Not Found	Not Found	Not Found	Not Found	High	Not Found		0	1.154	5.81	2
High	Master Protein	G7IAA3	Isocitrate dehydrogenase [NAD] subunit, mitochondrial OS=Medicago truncatula GN=MTR_1g064070 PE=3 SV=1	0	33.702	25.6983	7	11	7	1	358	39.5	7.53	High	High	High	High	High	Not Found	Not Found	Not Found		0	1.081	43.96	7
High	Master Protein	G7KT73	40S ribosomal protein S4 OS=Medicago truncatula GN=MTR_7g069950 PE=2 SV=1	0	14.984	25.6604	8	15	1	1	265	30	10.4	Not Found	Not Found	Not Found	Not Found	Medium	Not Found	Not Found	Not Found		0	1.683	31.9	8
High	Master Protein	G7JIM1	Histone H2A OS=Medicago truncatula GN=MTR_4g071150 PE=3 SV=1	0	11.74	25.6579	3	5	2	1	152	16.1	10.84	High	Not Found	Not Found	Not Found	Not Found	Not Found	Not Found	Not Found		0	2.162	15.85	3
High	Master Protein	Q4ZGM9	13-hydroperoxide lyase OS=Medicago truncatula GN=HPL3 PE=2 SV=1	0	97.644	25.625	13	46	13	1	480	53.7	8.15	High	High	High	High	High	High	Not Found	Not Found		0	5.7	186.85	13
High	Master Protein	G7L3X9	Transmembrane protein, putative OS=Medicago truncatula GN=MTR_7g102320 PE=2 SV=1	0	5.459	25.6098	2	4	2	1	82	9.1	7.83	High	High	Not Found	Not Found	Not Found	High	High	Not Found		0	1.512	5.7	2
High	Master Protein	G7ILG7	Secretory carrier-associated membrane protein OS=Medicago truncatula GN=MTR_2g012560 PE=3 SV=1	0	21.556	25.6055	4	6	3	1	289	32.4	8.48	Not Found	Not Found	High	High	Not Found	Medium	Not Found	Not Found		0	1.512	21.77	4
High	Master Protein	G7JJ67	Calmodulin-domain kinase CDPK protein OS=Medicago truncatula GN=MTR_4g132070 PE=4 SV=1	0	105.171	25.603	13	56	9	1	539	60.5	6.6	High	High	High	High	High	High	High	Not Found		0	3.252	215.67	13
High	Master Protein	A0A072V091	Translocase of chloroplast OS=Medicago truncatula GN=MTR_3g090160 PE=3 SV=1	0	37.641	25.6024	9	31	2	1	332	36.7	9.17	High	Not Found	High	Not Found	High	High	Not Found	Not Found		0	2.511	95.05	9
High	Master Protein	A0A072V6W9	Frigida interacting protein OS=Medicago truncatula GN=MTR_2g041690 PE=4 SV=1	0	39.997	25.5618	7	10	7	1	356	40.4	7.14	Not Found	High	High	High	High	Not Found	Not Found	High		0	1.565	37.43	7
High	Master Protein	I3SFE3	Proteasome subunit alpha type OS=Medicago truncatula GN=MTR_0167s0060 PE=2 SV=1	0	23.719	25.5319	4	6	4	1	235	25.6	5.68	High	Not Found	Not Found	High	High	Not Found	High	Not Found		0	1.276	25.56	4
High	Master Protein	G7JCK8	ATP synthase I, related protein OS=Medicago truncatula GN=MTR_4g079850 PE=4 SV=1	0	49.158	25.5132	7	10	7	1	341	37.8	9.06	Medium	High	Not Found	High	High	High	Not Found	Not Found		0	1.512	46.98	7
High	Master Protein	S4SZL4	Ribosomal protein S7 OS=Medicago truncatula GN=rps7 PE=3 SV=1	0	13.088	25.4777	6	10	1	1	157	17.8	11.62	Medium	Medium	Medium	Not Found	Not Found	Not Found	Not Found	Not Found		0	2.981	20.07	6
High	Master Protein	G7J2S0	Substrate carrier family protein OS=Medicago truncatula GN=MTR_3g098460 PE=3 SV=1	0	59.944	25.4658	8	20	8	1	483	54	6.01	High	High	High	High	High	High	High	Not Found	Deamidated [Q287]	0	1.207	87.81	8
High	Master Protein	I3SZM1	Thylakoid membrane phosphoprotein 14 kDa protein OS=Medicago truncatula GN=MTR_7g116795 PE=2 SV=1	0	26.472	25.4658	5	8	5	1	161	17.6	9.2	High	Not Found	Not Found	Not Found	Not Found	High	High	Not Found		0	2.511	29.23	5
High	Master Protein	G7LCN2	Plant/T32A16-60 protein OS=Medicago truncatula GN=MTR_8g032260 PE=2 SV=1	0	33.631	25.4098	6	20	5	1	244	27	8.57	Medium	Medium	Medium	High	High	High	High	Not Found		0	2.384	66.04	6
High	Master Protein	G7IMU5	Ras-related small GTP-binding family protein OS=Medicago truncatula GN=MTR_2g034640 PE=2 SV=1	0	20.386	25.3886	4	6	1	1	193	22.1	7.05	High	High	Not Found	Not Found	Not Found	Not Found	Not Found	Not Found		0	1.31	23.2	4
High	Master Protein	G7I7F0	O-acetylserine (Thiol) lyase OS=Medicago truncatula GN=MTR_1g081620 PE=2 SV=2	0	27.412	25.387	5	8	5	1	323	34.4	5.99	Not Found	Not Found	High	High	High	High	Not Found	Not Found		0	0.73	39.77	5
High	Master Protein	G7ICX7	Calcium-dependent phosphotriesterase superfamily protein OS=Medicago truncatula GN=MTR_1g086990 PE=4 SV=1	0	34.983	25.3823	6	10	6	1	327	35.7	8.13	High	High	High	High	High	High	Not Found	Not Found		0	0.931	33.1	6
High	Master Protein	G7K339	NOD3, putative OS=Medicago truncatula GN=MTR_5g089520 PE=4 SV=1	0	33.5	25.3561	4	5	4	1	351	40.2	7.58	Not Found	Not Found	High	High	High	Not Found	Not Found	Not Found		0	0.668	26.2	4
High	Master Protein	G7JBD1	Phytoene dehydrogenase/chromoplastic protein OS=Medicago truncatula GN=MTR_3g084850 PE=4 SV=2	0	15.754	25.3521	3	5	3	1	142	15.8	7.05	Not Found	High	High	Not Found	Not Found	High	High	Not Found		0	1.783	16.2	3
High	Master Protein	I3RZK0	Ribosomal-like protein, putative OS=Medicago truncatula GN=MTR_8g089655 PE=2 SV=1	0	17.822	25.3425	4	7	4	1	146	15.9	9.31	High	Not Found	High	Not Found	High	Not Found	Not Found	Not Found		0	3.217	22.32	4
High	Master Protein	G7JAP0	Sedoheptulose-1,7-bisphosphatase OS=Medicago truncatula GN=MTR_3g070100 PE=4 SV=1	0	39.857	25.323	10	23	10	1	387	41.9	6.87	High	High	High	High	High	High	Not Found	Not Found		0	1.894	70.55	10
High	Master Protein	I3S6K0	Cytochrome b559 subunit alpha OS=Medicago truncatula GN=psbE PE=2 SV=1	0	17.16	25.3012	2	15	2	1	83	9.4	4.94	High	High	High	High	High	High	Not Found	Not Found	Deamidated [Q75]	0	5.31	54.01	2
High	Master Protein	G7J3M7	30S ribosomal protein S13 OS=Medicago truncatula GN=MTR_3g073140 PE=2 SV=1	0	42.337	25.3012	6	10	6	1	166	18.9	10.43	High	High	Not Found	High	High	High	High	Not Found		0	2.455	49.01	6
High	Master Protein	A0A072UIK1	DnaJ heat shock amino-terminal domain protein OS=Medicago truncatula GN=MTR_4g032805 PE=4 SV=1	0	56.748	25.2788	7	18	7	1	269	30.7	7.52	High	High	Not Found	High	High	High	Not Found	Not Found		0	4.412	73.39	7
High	Master Protein	G7IAL5	60S ribosomal protein L36 OS=Medicago truncatula GN=MTR_1g100960 PE=3 SV=2	0	9.074	25.2174	4	8	3	1	115	13	11.46	Not Found	High	Medium	Not Found	High	High	Not Found	Not Found		0	2.162	19.83	4
High	Master Protein	Q2MJ21	Cytochrome P450 family monooxygenase OS=Medicago truncatula GN=CYP72A67 PE=2 SV=1	0	77.446	25.1923	15	34	13	1	520	59.8	8.9	High	High	High	High	High	High	High	Medium		0	1.683	116.71	15
High	Master Protein	I3SXR8	Ferredoxin-thioredoxin reductase, variable chain OS=Medicago truncatula GN=MTR_6g004100 PE=2 SV=1	0	14.292	25.1852	4	6	4	1	135	15.3	9.42	High	High	Not Found	Not Found	High	High	High	Not Found		0	1.783	17.55	4
High	Master Protein	A0A072V4H7	Uncharacterized protein OS=Medicago truncatula GN=MTR_3g114130 PE=4 SV=1	0	35.217	25.1834	8	8	1	1	409	44.7	7.55	Not Found	Not Found	Not Found	Not Found	Not Found	Not Found	High	Not Found		0	0.978	30.32	8
High	Master Protein	A0A072ULQ7	Substrate carrier family protein OS=Medicago truncatula GN=MTR_4g057850 PE=3 SV=1	0	26.009	25.1592	8	9	8	1	314	34.4	9.88	High	High	High	Not Found	Not Found	Not Found	High	Not Found		0	1.228	30.66	8
High	Master Protein	G7JNJ7	Enoyl-acyl-carrier reductase OS=Medicago truncatula GN=MTR_4g074950 PE=4 SV=2	0	28.81	25.1497	5	10	4	1	334	35.8	7.8	Not Found	Not Found	Not Found	High	High	Not Found	Not Found	High		0	0.688	50.92	5
High	Master Protein	G7J8H2	Peptidyl-prolyl cis-trans isomerase OS=Medicago truncatula GN=MTR_3g117750 PE=2 SV=1	0	13.759	25.1309	4	9	1	1	191	20.3	5.52	Not Found	Not Found	Not Found	Not Found	High	Not Found	Not Found	Not Found	Carboxymethyl [K133]	0	0.585	23.93	4
High	Master Protein	G7ICQ0	2-methyl-6-phytylbenzoquinone methyltransferase OS=Medicago truncatula GN=MTR_1g071110 PE=3 SV=1	0	74.585	25.072	9	46	6	1	347	39.1	9.06	High	High	High	High	High	High	High	Not Found	Deamidated [R120]	0	4.78	189.98	9
High	Master Protein	G7IEG7	Legumin storage protein OS=Medicago truncatula GN=MTR_1g072600 PE=3 SV=1	0	64.646	25.0429	9	26	2	1	583	67.2	6.95	High	High	High	High	High	Not Found	Not Found	Not Found		0	1.512	114.93	9
High	Master Protein	G7IJX0	DUF639 family protein OS=Medicago truncatula GN=MTR_2g007330 PE=4 SV=1	0	85.603	25	17	33	17	1	808	91.5	9.42	High	High	High	High	High	High	High	Not Found		0	1.683	125.36	17
High	Master Protein	G7L3M7	LRR receptor-like kinase OS=Medicago truncatula GN=MTR_7g077150 PE=4 SV=1	0	35.345	25	11	28	5	1	492	55.1	5.48	High	Medium	High	High	High	High	High	Not Found		0	1.352	80.17	11
High	Master Protein	I3ST38	Cytochrome C oxidase subunit 5b OS=Medicago truncatula GN=MTR_4g011340 PE=2 SV=1	0	60.83	25	6	21	6	1	156	17.3	6.04	High	Not Found	High	High	High	High	High	Not Found		0	11.915	91.43	6
High	Master Protein	G7KNF5	NADH-ubiquinone oxidoreductase OS=Medicago truncatula GN=MTR_6g084520 PE=4 SV=1	0	32.168	25	2	9	2	1	104	12.3	8.9	Not Found	Not Found	Not Found	High	High	High	Not Found	Not Found		0	5.813	55.65	2
High	Master Protein	G7J5A6	Uncharacterized protein OS=Medicago truncatula GN=MTR_3g114130 PE=4 SV=1	0	34.087	25	8	8	1	1	408	44.6	7.55	Not Found	Not Found	Not Found	Not Found	Not Found	Not Found	High	Not Found		0	0.978	30.17	8
High	Master Protein	G7KN41	Proteasome subunit beta type OS=Medicago truncatula GN=MTR_6g084450 PE=2 SV=1	0	13.345	25	5	9	3	1	232	26.2	8.05	Not Found	High	High	High	High	Not Found	Not Found	Not Found		0	1.154	33.03	5
High	Master Protein	A0A072UPJ4	Cytochrome P450 family 71 protein OS=Medicago truncatula GN=MTR_4g104640 PE=3 SV=1	0	37.747	24.952	13	29	13	1	521	59.7	7.46	High	High	High	High	High	High	High	Not Found		0	1.738	80.08	13
High	Master Protein	G7KAG7	Thylakoid lumenal 29 kDa protein OS=Medicago truncatula GN=MTR_5g064610 PE=3 SV=1	0	42.097	24.9292	8	19	8	1	353	38.9	8.09	High	High	High	High	Not Found	Not Found	Not Found	Not Found		0	1.721	71.43	8
High	Master Protein	G7JRW3	Sugar porter (SP) family MFS transporter OS=Medicago truncatula GN=MTR_4g091370 PE=3 SV=1	0	72.217	24.9035	13	60	13	1	518	56.8	9.01	High	High	High	High	High	High	High	Not Found		0	5.629	219.06	13
High	Master Protein	A0A072VPJ1	Protein disulfide isomerase-like protein, putative OS=Medicago truncatula GN=MTR_1g096790 PE=4 SV=1	0	63.545	24.8837	9	21	9	1	430	48.5	5.11	High	High	High	High	High	High	High	High		0	1.276	87.7	9
High	Master Protein	G7I6P0	Calcium-binding EF hand protein OS=Medicago truncatula GN=MTR_1g045490 PE=4 SV=2	0	125.912	24.875	17	45	17	1	800	90	6.48	High	High	High	High	High	High	High	Not Found		0	1.7	191.24	17
High	Master Protein	A0A072TUJ3	COP1-interactive protein, putative OS=Medicago truncatula GN=MTR_8g099275 PE=4 SV=1	0	140.807	24.8569	25	40	25	1	1223	141.5	4.98	Not Found	High	High	High	High	High	High	Not Found		0	1.23	164.15	25
High	Master Protein	G7I8F2	Long-chain fatty acyl CoA ligase, putative OS=Medicago truncatula GN=MTR_1g030290 PE=4 SV=1	0	74.482	24.8563	14	45	11	1	696	76.3	7.12	High	High	High	High	High	High	High	Not Found		0	2.36	148.73	14
High	Master Protein	G7J5Y6	Transmembrane protein, putative OS=Medicago truncatula GN=MTR_3g115930 PE=2 SV=1	0	24.34	24.8521	3	20	2	1	169	17.9	9.66	Not Found	High	High	High	High	High	High	Not Found	Deamidated [Q137; Q148; R150]	0	2.594	60.82	3
High	Master Protein	Q45FF2	Pyridoxal biosynthesis protein PDX1, putative OS=Medicago truncatula GN=MTR_2g017520 PE=2 SV=1	0	33.482	24.8408	5	13	5	1	314	33.5	5.9	Not Found	High	High	High	High	High	High	Not Found		0	1.154	54.27	5
High	Master Protein	G7LDP4	ADP/ATP carrier protein OS=Medicago truncatula GN=MTR_8g036880 PE=3 SV=1	0	49.681	24.812	14	44	1	1	399	43.3	9.82	Not Found	Medium	Not Found	Not Found	Not Found	Not Found	Not Found	Not Found	Deamidated [Q129]	0	2.914	129.28	14
High	Master Protein	A0A072U5R2	Photosystem II reaction center PsbP family protein OS=Medicago truncatula GN=MTR_7g111880 PE=4 SV=1	0	22.559	24.8	4	7	4	1	250	28.4	8.54	Not Found	Not Found	High	Not Found	High	High	Not Found	Not Found		0	0.778	29.16	4
High	Master Protein	G7IRB6	Proton pump interactor, putative OS=Medicago truncatula GN=MTR_2g085330 PE=4 SV=2	0	88.906	24.7774	15	31	14	1	674	75.8	8.87	High	High	High	High	High	High	High	Not Found		0	1.588	130.83	15
High	Master Protein	A0A072VQV0	NADH-ubiquinone oxidoreductase B18 subunit, putative OS=Medicago truncatula GN=MTR_1g112480 PE=4 SV=1	0	14.114	24.7619	2	7	2	1	105	12.2	7.21	High	High	High	High	Not Found	Not Found	Not Found	Not Found		0	1.371	28.79	2
High	Master Protein	G7JPU2	Serine/Threonine-kinase HT1-like protein OS=Medicago truncatula GN=MTR_4g106980 PE=4 SV=2	0	61.194	24.7449	12	28	5	1	392	43.9	7.61	Not Found	Not Found	Not Found	Not Found	Not Found	High	High	High	Deamidated [R288]	0	3.394	93.67	12
High	Master Protein	S4T0P4	Ribosomal protein L23 OS=Medicago truncatula GN=rpl23 PE=3 SV=1	0	20.987	24.7312	3	5	2	1	93	10.9	11.06	High	Not Found	Not Found	Not Found	Not Found	Not Found	Not Found	Not Found		0	9	18.35	3
High	Master Protein	G7JC06	60S ribosomal protein L17A OS=Medicago truncatula GN=MTR_3g085490 PE=2 SV=1	0	22.075	24.7253	4	6	2	1	182	20.7	10.36	Not Found	Not Found	Not Found	High	Not Found	Not Found	High	Not Found		0	1.848	24.91	4
High	Master Protein	B7FJQ4	Malate dehydrogenase OS=Medicago truncatula GN=MTR_1g043040 PE=2 SV=1	0	38.63	24.6988	7	20	3	1	332	35.5	6.54	Not Found	High	High	High	High	Not Found	Not Found	Not Found		0	1.462	71.07	7
High	Master Protein	A0A072UCG3	DnaJ heat shock amino-terminal domain protein OS=Medicago truncatula GN=MTR_5g004570 PE=4 SV=1	0	31.029	24.6964	6	10	5	1	247	27.8	5.96	Not Found	Not Found	Not Found	Not Found	High	High	High	Not Found	Deamidated [R169]	0	1.929	38.19	6
High	Master Protein	A0A072V3C0	Uncharacterized protein OS=Medicago truncatula GN=MTR_3g103290 PE=4 SV=1	0	10.162	24.6835	3	3	3	1	158	17.3	9.66	Not Found	Not Found	Not Found	Not Found	Not Found	High	Not Found	Not Found		0	0.995	10.16	3
High	Master Protein	A0A072UNM0	60S ribosomal protein L3B OS=Medicago truncatula GN=MTR_4g094398 PE=3 SV=1	0	34.443	24.6787	11	25	5	1	389	44.5	10.18	High	High	High	High	High	High	Not Found	Not Found		0	2.481	76.24	11
High	Master Protein	Q2MJ15	Cytochrome P450 family monooxygenase OS=Medicago truncatula GN=CYP92A29 PE=2 SV=1	0	78.613	24.6094	13	44	11	1	512	59.1	8.63	High	High	High	High	High	High	High	Not Found		0	4.055	151.93	13
High	Master Protein	A0A072V9M3	Elongation factor 1-beta OS=Medicago truncatula GN=MTR_2g461200 PE=3 SV=1	0	18.493	24.6094	5	6	1	1	256	28.1	4.48	Not Found	Not Found	Not Found	Not Found	Not Found	High	Not Found	Not Found		0	1.154	20.75	5
High	Master Protein	G7L7H0	Malic enzyme OS=Medicago truncatula GN=MTR_8g102620 PE=3 SV=1	0	52.052	24.5347	15	24	12	1	591	65.3	6.37	High	High	High	High	High	High	Not Found	Not Found		0	1.336	80.07	15
High	Master Protein	G7JXQ1	Dicarboxylate carrier protein OS=Medicago truncatula GN=MTR_5g032420 PE=3 SV=1	0	44.212	24.5342	10	24	9	1	322	34.3	9.88	High	High	High	High	High	High	Medium	Not Found	Deamidated [Q215]	0	4.08	86.8	10
High	Master Protein	A0A072TJ20	Succinate dehydrogenase [ubiquinone] iron-sulfur subunit, mitochondrial OS=Medicago truncatula GN=MTR_0018s0260 PE=3 SV=1	0	29.679	24.4604	8	23	1	1	278	31.3	8.43	Not Found	Not Found	Not Found	High	High	High	Not Found	Not Found		0	1.818	57.3	8
High	Master Protein	G7IED1	Stem-loop-binding protein of 41 kDa protein A OS=Medicago truncatula GN=MTR_1g072260 PE=4 SV=1	0	32.59	24.4389	7	10	7	1	401	43.4	7.33	High	High	High	High	Not Found	Not Found	Not Found	Not Found		0	1.154	42.53	7
High	Master Protein	B7FHF4	Ribosomal protein L19 OS=Medicago truncatula GN=MTR_1g087910 PE=2 SV=1	0	36.965	24.4131	7	20	4	1	213	24.7	11.37	Not Found	Not Found	High	High	High	Not Found	High	Not Found		0	18.307	67.33	7
High	Master Protein	G7JU01	Glutathione-regulated potassium-efflux system protein kefB OS=Medicago truncatula GN=MTR_4g092790 PE=4 SV=2	0	89.078	24.3719	17	44	17	1	796	86.5	5.43	High	High	High	High	High	High	High	High	Deamidated [Q766]	0	1.7	155.54	17
High	Master Protein	A0A072VAE0	Lipoxygenase OS=Medicago truncatula GN=MTR_3g081130 PE=3 SV=1	0	75.744	24.359	19	39	16	1	858	97.3	6.55	High	High	High	High	High	High	High	Not Found		0	1.183	123.34	19
High	Master Protein	B7FL82	26S proteasome regulatory particle non-ATPase subunit 12 OS=Medicago truncatula GN=MTR_1g016750 PE=2 SV=1	0	30.981	24.3446	6	8	6	1	267	30.9	5.07	High	High	Not Found	High	High	High	Not Found	Not Found		0	1.239	30.52	6
High	Master Protein	A0A072USZ0	Translation elongation factor EF1B, gamma chain OS=Medicago truncatula GN=MTR_4g134770 PE=4 SV=1	0	44.387	24.3437	8	17	3	1	419	48	6.32	Not Found	High	High	High	High	High	Not Found	Not Found		0	1.096	56.39	8
High	Master Protein	G7LHF7	TCP-1/cpn60 chaperonin family protein OS=Medicago truncatula GN=MTR_8g017080 PE=3 SV=1	0	49.228	24.3056	9	11	9	1	576	61.6	7.39	Not Found	Not Found	High	High	High	High	Not Found	Not Found		0	0.693	48.04	9
High	Master Protein	A0A072V3Q4	Uncharacterized protein OS=Medicago truncatula GN=MTR_3g115060 PE=4 SV=1	0	20.557	24.2991	2	3	2	1	107	12	9.63	Not Found	Medium	Not Found	High	Not Found	Not Found	Not Found	Not Found		0	1.683	15.19	2
High	Master Protein	G7IUM1	ATP-dependent zinc metalloprotease FTSH protein OS=Medicago truncatula GN=MTR_2g101290 PE=4 SV=1	0	89.404	24.2906	18	32	18	1	881	100.1	9.26	High	High	High	High	High	High	High	Not Found		0	1.581	123.33	18
High	Master Protein	A0A072TLZ7	Lipoxygenase OS=Medicago truncatula GN=MTR_8g018735 PE=3 SV=1	0	103.322	24.2775	18	43	11	1	865	96.9	6.37	High	High	High	High	High	High	Not Found	Not Found		0	1.184	169.12	18
Medium	Master Protein	G7KN98	Cytochrome c1, heme protein OS=Medicago truncatula GN=MTR_6g023280 PE=4 SV=2	0.028	1.215	24.2424	1	2	1	1	66	7.3	5.71	Not Found	Not Found	Not Found	High	High	Not Found	Not Found	Not Found	Deamidated [R26; Q29]	0	0.585	4	1
High	Master Protein	G7K6U0	ATP-dependent Clp protease proteolytic subunit OS=Medicago truncatula GN=MTR_5g026840 PE=2 SV=1	0	24.82	24.2424	6	9	6	1	297	32.5	5.27	High	High	Not Found	High	High	High	Not Found	Not Found		0	1.069	29.19	6
High	Master Protein	G7J0Z5	Photosystem I P700 chlorophyll A apoprotein A2 OS=Medicago truncatula GN=MTR_3g035600 PE=3 SV=2	0	283.055	24.1517	40	232	7	1	1503	167.9	7.28	High	High	High	High	High	High	Not Found	Not Found	Deamidated [Q213; Q490; Q1171; R1179]	0	7.503	703.59	40
High	Master Protein	I3S3S0	Cytosolic triosephosphate isomerase OS=Medicago truncatula GN=MTR_2g096940 PE=2 SV=1	0	37.507	24.1107	5	17	4	1	253	27.2	5.92	High	High	High	High	Not Found	High	Not Found	Not Found		0	2.415	71.84	5
High	Master Protein	G7KK02	LRR receptor-like kinase OS=Medicago truncatula GN=MTR_6g009370 PE=4 SV=1	0	94.199	24.0864	10	31	10	1	602	66.6	6.74	High	High	High	High	High	High	Not Found	Not Found	Phospho [S582; S584]; Deamidated [R314]	0	2.535	132.94	10
High	Master Protein	G7KY81	Transmembrane protein, putative OS=Medicago truncatula GN=MTR_7g074070 PE=4 SV=1	0	59.809	24.0793	9	23	7	1	353	37.2	8.72	High	High	High	Not Found	High	High	High	High		0	2.325	101.58	9
High	Master Protein	G7IMH4	Grx4 family monothiol glutaredoxin OS=Medicago truncatula GN=MTR_2g103130 PE=2 SV=1	0	30.22	24.0506	3	4	3	1	158	17.6	8.09	Not Found	Not Found	Not Found	Not Found	High	High	High	Not Found		0	1.512	19.49	3
High	Master Protein	G7IUC4	ADP/ATP carrier protein OS=Medicago truncatula GN=MTR_2g098070 PE=3 SV=1	0	27.555	24.0331	9	29	4	1	362	39.3	9.83	High	High	High	High	High	Not Found	Not Found	Not Found	Deamidated [Q93]	0	2.162	74.15	9
High	Master Protein	G7JFG1	NAD-dependent epimerase/dehydratase family protein OS=Medicago truncatula GN=MTR_4g115730 PE=2 SV=1	0	51.431	23.9726	6	21	6	1	292	31.7	7.99	High	High	High	High	High	High	Not Found	Not Found		0	1.976	92.44	6
High	Master Protein	A0A072VR00	D-3-phosphoglycerate dehydrogenase OS=Medicago truncatula GN=MTR_1g107480 PE=3 SV=1	0	69.356	23.9531	12	20	12	1	597	62.9	6.34	Not Found	High	High	High	High	High	High	Not Found		0	2.384	74.74	12
High	Master Protein	A0A072VW87	UDP-glucuronic acid decarboxylase OS=Medicago truncatula GN=MTR_1g067530 PE=4 SV=1	0	38.543	23.913	9	17	7	1	460	51.5	8.56	High	High	High	High	High	High	High	High	Deamidated [Q340]	0	0.995	59.98	9
High	Master Protein	A2Q2R1	Thioredoxin H2-like protein OS=Medicago truncatula GN=MTR_7g009070 PE=2 SV=1	0	14.647	23.8806	3	4	3	1	134	14.8	5.88	Not Found	High	Not Found	Not Found	High	High	Medium	Not Found		0	2.162	12.63	3
High	Master Protein	G7KMW6	RmlC-like cupins superfamily protein OS=Medicago truncatula GN=MTR_6g059920 PE=4 SV=2	0	6.879	23.8462	3	4	3	1	130	14.8	5.54	High	High	Not Found	Not Found	High	High	Not Found	Not Found		0	0.995	11.79	3
High	Master Protein	G7J060	Glutathione S-transferase, amino-terminal domain protein OS=Medicago truncatula GN=MTR_3g005720 PE=4 SV=1	0	46.17	23.839	7	17	7	1	323	36.1	6.96	High	High	High	High	High	Not Found	High	Not Found		0	2.652	74.45	7
High	Master Protein	G7K0K7	Emp24/gp25L/p24 family protein OS=Medicago truncatula GN=MTR_5g098250 PE=2 SV=1	0	27.545	23.8318	3	5	3	1	214	24.8	6.34	Not Found	Not Found	Not Found	High	High	Not Found	Not Found	Not Found		0	0.931	27.41	3
High	Master Protein	G7J9B1	Tonoplast monosaccharide transporter 2 OS=Medicago truncatula GN=MTR_3g118530 PE=3 SV=1	0	107.4	23.7903	12	32	12	1	744	79.2	5.11	High	High	High	High	High	High	High	Not Found	Phospho [S343]	1	2.621	131.58	12
High	Master Protein	D8L5E3	Thioredoxin OS=Medicago truncatula GN=MTR_7g073680 PE=2 SV=1	0	16.137	23.741	3	13	2	1	139	15.6	5.06	High	High	High	High	Not Found	Not Found	Not Found	Not Found		0	1.512	45.74	3
High	Master Protein	G7IS33	DEAD-box ATP-dependent RNA helicase OS=Medicago truncatula GN=MTR_2g099620 PE=3 SV=1	0	32.2	23.7288	9	13	1	1	413	46.7	5.82	Not Found	Not Found	Not Found	High	Not Found	Not Found	Not Found	Not Found		0	1.61	41.55	9
High	Master Protein	A2Q689	DEAD-box ATP-dependent RNA helicase OS=Medicago truncatula GN=MTR_2g039960 PE=3 SV=1	0	34.207	23.7288	11	17	3	1	413	46.8	5.48	High	High	Not Found	High	High	Not Found	Not Found	Not Found		0	2.311	52.59	11
High	Master Protein	G7IED3	FZO-like protein OS=Medicago truncatula GN=MTR_1g072270 PE=4 SV=1	0	115.479	23.6324	20	41	20	1	914	101.6	5.24	High	High	High	High	High	High	High	Not Found		0	1.963	153.21	20
High	Master Protein	G7KQP7	Ubiquitin-associated/TS-N domain protein OS=Medicago truncatula GN=MTR_7g089550 PE=4 SV=1	0	30.052	23.6301	6	13	6	1	292	32.8	9.95	Medium	Not Found	High	High	High	High	Not Found	Not Found		0	1.976	52.28	6
High	Master Protein	I3SSX1	Proteasome subunit alpha type OS=Medicago truncatula GN=MTR_1g112250 PE=2 SV=1	0	48.211	23.6287	7	13	7	1	237	26	4.75	Not Found	High	High	High	High	Not Found	Not Found	Not Found		0	2.384	63.01	7
High	Master Protein	G7KH59	Nodule-specific Glycine Rich Peptide OS=Medicago truncatula GN=MTR_5g084270 PE=4 SV=1	0	10.964	23.622	2	2	2	1	127	11.3	9.01	Not Found	Not Found	Not Found	Not Found	High	High	Not Found	Not Found		0	0.668	7.73	2
High	Master Protein	G7J5I9	Proteasome subunit beta type OS=Medicago truncatula GN=MTR_3g089040 PE=3 SV=1	0	24.944	23.6162	3	5	3	1	271	29.1	6.54	Not Found	Not Found	High	High	High	Not Found	Not Found	Not Found		0	0.501	29.38	3
High	Master Protein	G7L1X0	GDP-D-mannose-3,5-epimerase OS=Medicago truncatula GN=MTR_7g115080 PE=4 SV=1	0	36.016	23.601	8	22	2	1	411	46.4	6.47	High	Not Found	High	High	High	High	Not Found	Not Found		0	1.471	74.15	8
High	Master Protein	A0A072VF81	Plant/F18O14-17 protein OS=Medicago truncatula GN=MTR_1g022045 PE=4 SV=1	0	48.054	23.5747	14	19	14	1	649	71.9	7.33	Not Found	High	High	High	High	High	High	Not Found		0	1.154	57.25	14
High	Master Protein	A0A072VAY8	NADPH-protochlorophyllide oxidoreductase OS=Medicago truncatula GN=MTR_2g079710 PE=4 SV=1	0	43.067	23.5589	8	15	8	1	399	43	9.07	High	High	High	High	High	High	High	High		0	1.346	55.12	8
High	Master Protein	A0A072V3P1	Outer envelope pore protein OS=Medicago truncatula GN=MTR_4g134950 PE=4 SV=1	0	41.001	23.5119	5	13	5	1	336	37.8	7.9	High	High	Not Found	High	High	High	High	Not Found		0	0.874	58.49	5
High	Master Protein	G7IME0	D-glycerate 3-kinase OS=Medicago truncatula GN=MTR_2g102510 PE=4 SV=1	0	39.901	23.4884	6	11	6	1	430	48	6.74	Not Found	High	High	High	High	Not Found	High	Not Found		0	0.859	61.59	6
High	Master Protein	G7LAE7	Peptidylprolyl isomerase OS=Medicago truncatula GN=MTR_8g091410 PE=2 SV=1	0	28.565	23.4742	6	17	6	1	213	22.8	8.15	High	High	High	High	High	High	Not Found	Not Found		0	3.642	50.94	6
High	Master Protein	G7IKY4	Translocon outer complex protein OS=Medicago truncatula GN=MTR_2g030630 PE=4 SV=1	0	142.203	23.4679	22	45	22	1	1338	146.5	4.72	High	High	High	High	High	High	High	Not Found	Phospho [S223]	1	1.266	173.64	22
High	Master Protein	G7IAA1	PfkB family carbohydrate kinase OS=Medicago truncatula GN=MTR_1g064060 PE=4 SV=1	0	71.004	23.4604	7	16	7	1	341	37.6	5.19	High	High	High	High	High	High	Not Found	Not Found		0	3.084	76.57	7
High	Master Protein	Q7X9B3	9/13 hydroperoxide lyase OS=Medicago truncatula GN=hpl1 PE=2 SV=1	0	58.323	23.444	11	31	8	1	482	53.9	6.61	High	High	High	High	High	High	High	High		0	1.929	108.44	11
High	Master Protein	G7IDQ0	Cytochrome c oxidase subunit 5C OS=Medicago truncatula GN=MTR_1g087020 PE=3 SV=1	0.001	3.267	23.4375	2	6	2	1	64	7.1	7.52	Not Found	High	High	High	High	High	Not Found	Not Found		0	1.154	11.11	2
High	Master Protein	A0A072TKG5	ATP synthase subunit alpha OS=Medicago truncatula GN=MTR_0002s0550 PE=3 SV=1	0	110.283	23.4127	13	124	2	1	504	55.1	6.48	High	High	High	High	High	Not Found	Not Found	Not Found	Deamidated [Q97; R128; Q148; R297]; Phospho [T92]; Carboxymethyl [K119]	1	5.579	468.6	13
High	Master Protein	G7KY76	EF hand calcium-binding family protein OS=Medicago truncatula GN=MTR_7g074020 PE=4 SV=1	0	14.864	23.3918	3	3	3	1	171	19.8	4.97	Not Found	Not Found	Not Found	Not Found	Not Found	High	High	Not Found	Deamidated [Q133]	0	0.638	9.96	3
High	Master Protein	A0A072UCM8	Phosphotransferase OS=Medicago truncatula GN=MTR_6g088795 PE=3 SV=1	0	62.129	23.3871	9	20	5	1	496	53.7	6	High	Not Found	High	High	High	High	High	Not Found	Deamidated [Q298; Q310]; Phospho [S304]; Carboxymethyl [K314]	1	1.471	84.01	9
High	Master Protein	A0A072U288	Transducin/WD-like repeat-protein OS=Medicago truncatula GN=MTR_7g074890 PE=4 SV=1	0	48.109	23.3796	9	17	9	1	432	46.8	8.82	High	High	High	High	High	High	High	Not Found		0	1.894	58.79	9
High	Master Protein	A0A072TYH7	Oxygen-evolving complex/thylakoid lumenal 25.6 kDa protein OS=Medicago truncatula GN=MTR_7g023290 PE=4 SV=1	0	35.678	23.3333	8	21	8	1	240	26.8	9.44	High	High	High	High	High	High	High	Not Found		0	3.217	74.79	8
High	Master Protein	I3SPQ1	60S ribosomal protein L32-1 OS=Medicago truncatula GN=MTR_7g053180 PE=2 SV=1	0	9.742	23.3083	4	14	4	1	133	15.6	10.77	High	High	High	High	Not Found	Not Found	Not Found	Not Found		0	4.179	47.6	4
High	Master Protein	I3S539	Bet1-like SNARE protein 1-1 OS=Medicago truncatula GN=MTR_1g044145 PE=2 SV=1	0	13.876	23.3083	2	2	2	1	133	15.3	7.5	Not Found	Not Found	Not Found	Not Found	Not Found	High	High	Not Found		0	1.512	9.26	2
Low	Master Protein	G7JLI9	Late embryogenesis abundant protein OS=Medicago truncatula GN=MTR_4g120040 PE=4 SV=1	0.084	0.756	23.301	1	2	1	1	103	11.3	9.29	Not Found	Medium	Medium	Not Found	Not Found	Not Found	Not Found	Not Found		0	0.389	7.66	1
High	Master Protein	G7K7Q7	ABC-type transport system protein OS=Medicago truncatula GN=MTR_5g088340 PE=4 SV=2	0	39.15	23.2984	9	17	9	1	382	42	9.07	High	High	High	High	High	High	High	Not Found		0	1.395	49.53	9
High	Master Protein	A0A072UPA0	Acytochrome-C oxidase/electron carrier protein OS=Medicago truncatula GN=MTR_4g101930 PE=4 SV=1	0	7.226	23.2877	2	4	2	1	73	8.4	9.92	Not Found	Not Found	Medium	Medium	High	Not Found	Not Found	Not Found		0	4.623	8.28	2
High	Master Protein	G7IMF5	Drug resistance transporter-like ABC domain protein OS=Medicago truncatula GN=MTR_2g102670 PE=3 SV=1	0	151.152	23.2624	33	75	3	1	1410	158.3	7.09	Not Found	Not Found	High	Not Found	High	High	Not Found	Not Found		0	1.654	252.79	33
High	Master Protein	G7IEN7	Sec-independent protein translocase OS=Medicago truncatula GN=MTR_1g100220 PE=4 SV=1	0	19.052	23.2558	3	4	3	1	258	27.9	7.4	Not Found	Not Found	Not Found	Not Found	High	High	High	Not Found		0	0.501	18.51	3
High	Master Protein	A0A072UU27	F0F1 ATP synthase subunit gamma OS=Medicago truncatula GN=MTR_4g129790 PE=3 SV=1	0	27.944	23.2416	6	10	6	1	327	35.5	9.2	High	High	High	High	High	High	High	Not Found		0	1.254	35.97	6
High	Master Protein	G7KKB4	Succinyl-CoA ligase [ADP-forming] subunit alpha-2 OS=Medicago truncatula GN=MTR_6g077820 PE=3 SV=1	0	46.357	23.2198	6	12	6	1	323	33.8	8.41	High	High	High	High	High	High	Not Found	Not Found		0	1.955	56.45	6
High	Master Protein	A0A072UGB8	ADP,ATP carrier protein OS=Medicago truncatula GN=MTR_4g011460 PE=3 SV=1	0	120.46	23.2114	12	51	9	1	629	68.7	9.38	High	High	High	High	High	High	High	Not Found	Deamidated [R627]	0	1.683	295.75	12
High	Master Protein	G7IAX8	Plastid lipid-associated protein OS=Medicago truncatula GN=MTR_1g116320 PE=4 SV=1	0	38.49	23.1959	7	11	7	1	388	42.8	7.84	High	High	High	High	High	High	High	Not Found		0	1.291	45.09	7
High	Master Protein	G7ICK3	Transmembrane protein, putative OS=Medicago truncatula GN=MTR_1g039490 PE=4 SV=2	0	42.854	23.1707	6	10	6	1	328	36.6	9.41	High	High	High	High	High	High	Not Found	Not Found		0	1.738	48.99	6
High	Master Protein	I3T0T7	Translocase of outer membrane complex, subunit TOM22 OS=Medicago truncatula GN=MTR_1g069560 PE=2 SV=1	0	12.464	23.1579	1	5	1	1	95	10.2	9.7	Not Found	Not Found	Not Found	High	High	High	Not Found	Not Found		0	1.512	27.62	1
High	Master Protein	A0A072VMU1	Outer envelope pore protein OS=Medicago truncatula GN=MTR_2g096900 PE=4 SV=1	0	14.254	23.1293	3	3	3	1	147	15.3	8.94	High	Not Found	Not Found	Not Found	High	Not Found	Not Found	Not Found		0	1.154	11.52	3
High	Master Protein	G7J4G1	Plastocyanin-like domain protein OS=Medicago truncatula GN=MTR_3g099580 PE=4 SV=1	0	42.131	23.1183	3	5	3	1	186	19	7.4	Not Found	Not Found	High	High	Not Found	Not Found	Not Found	Not Found		0	2.728	31.48	3
High	Master Protein	A0A072VK24	Transmembrane protein, putative OS=Medicago truncatula GN=MTR_1g063070 PE=4 SV=1	0	28.576	23.1092	6	13	6	1	238	25.4	8.72	High	High	High	High	High	High	High	High		0	4.337	37.63	6
High	Master Protein	Q2MJ08	Cytochrome P450 family monooxygenase OS=Medicago truncatula GN=CYP72A61 PE=2 SV=1	0	63.716	23.1061	14	23	14	1	528	60	9.14	High	High	High	High	High	High	High	Not Found		0	2.562	73.62	14
High	Master Protein	A0A072TQN9	Plastocyanin-like domain protein OS=Medicago truncatula GN=MTR_8g463180 PE=4 SV=1	0	38.009	23.1023	9	20	9	1	303	30.1	8.68	High	High	High	High	High	High	High	Not Found		0	9	70.39	9
High	Master Protein	A0A072TIU5	DUF3411 domain protein OS=Medicago truncatula GN=MTR_0013s0150 PE=4 SV=1	0	42.026	23.0971	12	30	9	1	381	40.9	7.85	High	High	High	High	High	High	Not Found	Not Found		0	2.831	80.8	12
High	Master Protein	G7I394	Major intrinsic protein (MIP) family transporter OS=Medicago truncatula GN=MTR_1g095070 PE=3 SV=1	0	17.45	23.0769	4	14	1	1	221	23.5	9.44	High	High	Not Found	Not Found	High	Not Found	Not Found	Not Found		0	2.162	49.94	4
High	Master Protein	G7JK13	30S ribosomal protein S9P OS=Medicago truncatula GN=MTR_4g085580 PE=2 SV=1	0	8.753	23.0769	3	6	2	1	143	16.4	10.15	High	High	Not Found	High	High	Not Found	Not Found	Not Found		0	1.154	15.49	3
High	Master Protein	G7LE33	40S ribosomal protein S12 OS=Medicago truncatula GN=MTR_8g093770 PE=2 SV=1	0	14.439	23.0769	2	4	2	1	143	15.2	5.78	Not Found	High	Not Found	High	Not Found	Not Found	Not Found	Not Found		0	0.995	21.63	2
High	Master Protein	G7IET9	ATP-dependent Clp protease proteolytic subunit OS=Medicago truncatula GN=MTR_1g106550 PE=3 SV=1	0	25.767	23.0563	6	7	6	1	373	41.3	9.11	Not Found	High	High	High	High	Not Found	High	Not Found		0	0.778	26.99	6
High	Master Protein	G7IP56	Multidrug resistance protein ABC transporter family protein OS=Medicago truncatula GN=MTR_2g019020 PE=4 SV=2	0	216.91	23.0389	35	86	33	1	1619	181	6.61	High	High	High	High	High	High	High	High		0	1.943	369.04	35
High	Master Protein	G7JI90	Non-specific lipid-transfer protein OS=Medicago truncatula GN=MTR_4g027840 PE=3 SV=2	0	15.984	23.0216	2	5	2	1	139	13.8	8.43	Not Found	High	High	High	Not Found	High	Not Found	Not Found		0	0.668	27.33	2
High	Master Protein	A0A072VDK2	Outer envelope pore protein 24B OS=Medicago truncatula GN=MTR_1g022050 PE=4 SV=1	0	12.684	23.0047	4	5	4	1	213	23.6	9.38	Medium	Not Found	High	High	High	Not Found	Not Found	Not Found		0	1.031	18.44	4
High	Master Protein	A0A072UM07	Uncharacterized protein OS=Medicago truncatula GN=MTR_4g082883 PE=4 SV=1	0	11.347	23	1	2	1	1	100	10.1	9.52	Not Found	Not Found	Not Found	Not Found	High	Not Found	Not Found	Not Found		0	1.154	11.14	1
High	Master Protein	A0A072UR85	DUF21 domain plant protein OS=Medicago truncatula GN=MTR_4g117360 PE=4 SV=1	0	64.203	22.9675	9	17	5	1	492	53.6	6.04	High	High	High	High	High	High	High	Not Found		0	1.512	80.4	9
High	Master Protein	A0A072UXB1	Translation elongation factor EF1B, gamma chain OS=Medicago truncatula GN=MTR_3g058940 PE=4 SV=1	0	29.333	22.9117	8	18	3	1	419	47.7	6.37	Not Found	Not Found	Not Found	High	High	High	High	Not Found		0	0.848	55.12	8
High	Master Protein	A0A072UL21	Structural constituent of ribosome protein OS=Medicago truncatula GN=MTR_4g068770 PE=4 SV=1	0	48.548	22.9008	4	13	4	1	262	28.8	9.03	High	High	High	Not Found	High	High	High	Not Found	Deamidated [R75]	0	1.929	67.98	4
High	Master Protein	B7FH91	60S ribosomal L12-like protein OS=Medicago truncatula GN=MTR_4g059400 PE=2 SV=1	0	10.766	22.8916	3	4	1	1	166	17.8	8.91	Not Found	Not Found	Not Found	Not Found	Not Found	High	High	Not Found		0	0.995	12.02	3
High	Master Protein	I3SXZ6	60S ribosomal L12-like protein OS=Medicago truncatula GN=MTR_1g064500 PE=2 SV=1	0	10.963	22.8916	3	3	1	1	166	17.8	8.68	Not Found	Not Found	Not Found	Not Found	Not Found	Not Found	High	Not Found		0	0.995	9.43	3
High	Master Protein	A0A072TYY4	Ribulose-phosphate 3-epimerase OS=Medicago truncatula GN=MTR_7g029630 PE=3 SV=1	0	8.961	22.87	3	3	3	1	223	24.1	5.54	Not Found	Not Found	Not Found	High	Not Found	Not Found	Not Found	Not Found		0	0.874	10.2	3
High	Master Protein	A0A072UAP6	M48 family peptidase OS=Medicago truncatula GN=MTR_6g463380 PE=4 SV=1	0	55.363	22.8464	10	14	10	1	534	59.4	9.6	High	High	Medium	High	High	High	High	Not Found		0	0.983	51.63	10
High	Master Protein	G7IMV1	Alpha-L-arabinofuranosidase/beta-D-xylosidase OS=Medicago truncatula GN=MTR_2g034720 PE=4 SV=1	0	81.123	22.8346	15	26	15	1	762	82.6	8.47	High	High	High	High	High	High	High	Not Found	Deamidated [Q187; Q190; R197]	0	1.188	95.92	15
High	Master Protein	G7KN99	Cytochrome c1, heme protein OS=Medicago truncatula GN=MTR_6g023290 PE=4 SV=1	0	33.331	22.8013	5	29	1	1	307	33.5	7.24	Not Found	Not Found	Not Found	Not Found	Not Found	High	Medium	Not Found	Carboxymethyl [K128]	0	2.162	113.56	5
High	Master Protein	G7K1K2	Alpha/beta-hydrolase superfamily protein OS=Medicago truncatula GN=MTR_5g056550 PE=4 SV=1	0	34.666	22.7848	9	21	9	1	395	44.7	8.31	High	High	High	High	High	Not Found	High	Not Found		0	1.894	68.11	9
High	Master Protein	G7IRA1	40S ribosomal protein S20-2 OS=Medicago truncatula GN=MTR_1g091057 PE=2 SV=1	0	15.654	22.7642	4	12	4	1	123	13.8	9.29	Medium	High	High	High	High	Not Found	Not Found	Not Found		0	2.594	36.04	4
High	Master Protein	I3T0E1	Translationally-controlled tumor-like protein OS=Medicago truncatula GN=MTR_2g436620 PE=2 SV=1	0	24.384	22.7545	3	5	3	1	167	18.9	4.79	Not Found	Not Found	High	High	High	Not Found	Not Found	Not Found		0	0.874	30.41	3
High	Master Protein	G7J2H3	NADH-ubiquinone reductase complex 1 MLRQ subunit OS=Medicago truncatula GN=MTR_3g085890 PE=2 SV=1	0	5.701	22.7273	2	2	2	1	88	10	9.72	Not Found	Not Found	Not Found	High	Not Found	Not Found	High	Not Found		0	1.512	6.45	2
High	Master Protein	B7FKD8	PRA1 family protein OS=Medicago truncatula GN=MTR_2g100270 PE=2 SV=1	0	30.358	22.7027	3	13	3	1	185	20.6	9.6	High	High	High	High	Not Found	Not Found	Not Found	Not Found		0	2.162	41.77	3
High	Master Protein	G7J7N8	ADP/ATP carrier protein OS=Medicago truncatula GN=MTR_3g104500 PE=3 SV=1	0	25.067	22.6994	5	5	5	1	326	36.3	9.79	Not Found	High	High	High	High	Not Found	Not Found	Not Found		0	0.778	20.44	5
High	Master Protein	A0A072VGH7	TCP-1/cpn60 chaperonin family protein OS=Medicago truncatula GN=MTR_1g030650 PE=3 SV=1	0	46.631	22.6519	10	12	9	1	543	58.5	5.41	High	Not Found	Not Found	High	High	High	High	Not Found		0	0.833	37.28	10
High	Master Protein	A0A072W2L8	Photosystem II reaction center PsbP family protein OS=Medicago truncatula GN=MTR_1g115410 PE=4 SV=1	0	34.419	22.6496	5	17	5	1	234	27.1	8.51	High	High	High	High	High	Not Found	High	Not Found		0	1.929	61.57	5
High	Master Protein	G7I839	DUF1995 domain protein OS=Medicago truncatula GN=MTR_1g082900 PE=4 SV=1	0	23.744	22.63	7	11	7	1	327	36.9	5.06	Not Found	High	Not Found	High	High	High	Medium	Medium		0	1.512	32.98	7
High	Master Protein	G7KKY6	Pro-resilin, putative OS=Medicago truncatula GN=MTR_6g012780 PE=4 SV=1	0	32.389	22.6277	5	5	5	1	411	45.4	4.93	Not Found	Not Found	Not Found	Not Found	High	High	Medium	Not Found		0	0.778	28.24	5
High	Master Protein	G7ILF2	60S ribosomal protein L26-1 OS=Medicago truncatula GN=MTR_2g012450 PE=2 SV=1	0	13.937	22.6027	3	7	2	1	146	16.7	11.15	Not Found	Not Found	High	High	High	High	Not Found	Not Found		0	2.728	18.26	3
High	Master Protein	G7LGJ8	Calnexin 2 OS=Medicago truncatula GN=MTR_8g095680 PE=3 SV=1	0	64.006	22.5926	11	25	9	1	540	61.8	4.97	High	High	High	High	Not Found	High	High	Not Found		0	1.656	92.77	11
High	Master Protein	G7K8W1	Transmembrane protein, putative OS=Medicago truncatula GN=MTR_5g059050 PE=4 SV=1	0	4.98	22.5806	1	1	1	1	93	9.9	4.75	Not Found	Not Found	Not Found	Not Found	Not Found	High	Not Found	Not Found		0	0.585	3.95	1
High	Master Protein	G7J6F8	Multiple division site protein, putative OS=Medicago truncatula GN=MTR_3g116050 PE=4 SV=1	0	20.692	22.561	5	5	5	1	328	37.4	9.99	Not Found	High	High	Not Found	High	Not Found	High	Not Found		0	0.778	16.52	5
High	Master Protein	G7KVA5	ATP-dependent Clp protease proteolytic subunit OS=Medicago truncatula GN=MTR_7g082980 PE=2 SV=1	0	21.854	22.5589	5	8	5	1	297	32.6	7.81	Not Found	High	High	High	High	High	Not Found	Not Found		0	1.154	27.03	5
High	Master Protein	G7J3V3	CBS/octicosapeptide/phox/Bemp1 (PB1) domain protein OS=Medicago truncatula GN=MTR_3g099100 PE=4 SV=1	0	42.404	22.5379	9	11	8	1	528	57	7.42	High	Not Found	High	High	High	Not Found	High	Not Found		0	0.951	40.75	9
High	Master Protein	A0A072U9C3	Sucrose proton symporter 2 OS=Medicago truncatula GN=MTR_6g033580 PE=4 SV=1	0	94.68	22.5049	12	44	12	1	511	54.6	8.13	High	High	High	High	High	High	High	Not Found		0	3.394	172.88	12
High	Master Protein	G7IMF4	Drug resistance transporter-like ABC domain protein OS=Medicago truncatula GN=MTR_2g102660 PE=3 SV=1	0	150.542	22.4947	32	79	2	1	1427	160.4	6.89	High	High	High	High	Not Found	Not Found	Not Found	Not Found		0	1.562	262.08	32
High	Master Protein	G7L626	Protein YIPF OS=Medicago truncatula GN=MTR_7g104430 PE=2 SV=1	0	24.239	22.449	4	7	4	1	245	26.3	6.06	High	Medium	High	Not Found	High	Not Found	Not Found	Not Found		0	1.848	27.12	4
Medium	Master Protein	G7L5J9	Uncharacterized protein OS=Medicago truncatula GN=MTR_7g064960 PE=4 SV=1	0.039	1.047	22.4138	1	1	1	1	58	6.5	5.71	Not Found	High	Not Found	Not Found	Not Found	Not Found	Not Found	Not Found	Deamidated [Q42]	0	1.154	2.45	1
High	Master Protein	G7LIR4	General regulatory factor 2 OS=Medicago truncatula GN=MTR_8g086270 PE=2 SV=2	0	15.523	22.3938	6	19	1	1	259	29.3	4.88	Not Found	Not Found	Not Found	Not Found	High	High	Not Found	Not Found		0	1.154	48.1	6
High	Master Protein	B7FHE5	40S ribosomal protein S19-1 OS=Medicago truncatula GN=MTR_8g040740 PE=2 SV=1	0	10.038	22.3776	3	5	1	1	143	15.9	10.04	Not Found	Not Found	High	Not Found	Not Found	Not Found	Not Found	Not Found		0	0.995	12.19	3
High	Master Protein	A0A072UDY2	Presequence protease OS=Medicago truncatula GN=MTR_5g004680 PE=4 SV=1	0	94.722	22.377	22	32	22	1	1077	120.6	5.55	High	High	High	High	High	High	High	Not Found		0	1.092	110.79	22
High	Master Protein	A0A072URC7	ATP-dependent Clp protease proteolytic subunit OS=Medicago truncatula GN=MTR_4g099360 PE=3 SV=1	0	21.434	22.3684	5	6	5	1	304	33.6	9.47	Not Found	Not Found	Not Found	High	High	Not Found	Not Found	Not Found		0	0.778	20.1	5
High	Master Protein	A0A072V335	MFP1 attachment factor-like protein OS=Medicago truncatula GN=MTR_3g102500 PE=4 SV=1	0	14.177	22.3602	2	2	2	1	161	16.9	4.41	Not Found	High	Not Found	Not Found	Not Found	Not Found	High	Not Found		0	0.778	8.23	2
High	Master Protein	A0A072VVP7	S-adenosylmethionine synthase OS=Medicago truncatula GN=MTR_1g063060 PE=3 SV=1	0	32.613	22.3039	8	20	3	1	408	44.9	6.71	Not Found	Not Found	High	Not Found	High	High	Not Found	Not Found		0	1.424	71.37	8
High	Master Protein	A0A072VP48	Succinate dehydrogenase [ubiquinone] iron-sulfur subunit, mitochondrial OS=Medicago truncatula GN=MTR_1g492610 PE=3 SV=1	0	14.428	22.3022	8	19	1	1	278	31.4	8.53	Not Found	Not Found	Not Found	Not Found	Not Found	High	Not Found	Not Found		0	1.404	33.94	8
High	Master Protein	A0A072UN34	Protein phosphatase 2C-like protein OS=Medicago truncatula GN=MTR_4g094208 PE=4 SV=1	0	24.138	22.3022	5	10	5	1	278	30.3	7.21	High	High	High	High	High	High	Not Found	High		0	0.778	37.09	5
High	Master Protein	B7FHS6	Transmembrane protein, putative OS=Medicago truncatula GN=MTR_1g112860 PE=2 SV=1	0	23.96	22.2997	5	20	5	1	287	30.6	9.82	High	High	High	High	High	High	High	Not Found		0	1.738	72.89	5
High	Master Protein	B7FGQ6	4-hydroxy-4-methyl-2-oxoglutarate aldolase OS=Medicago truncatula GN=MTR_7g080040 PE=2 SV=1	0	8.499	22.2892	3	3	2	1	166	17.8	5.57	Not Found	Not Found	High	Not Found	High	Not Found	Not Found	Not Found		0	0.874	8.4	3
High	Master Protein	G7LDJ8	Cytochrome P450 family protein OS=Medicago truncatula GN=MTR_8g035760 PE=4 SV=2	0	38.193	22.2656	10	20	10	1	512	58.8	8.85	High	High	High	High	High	Not Found	Not Found	Not Found		0	1.062	64.42	10
High	Master Protein	A2Q321	Epoxide hydrolase OS=Medicago truncatula GN=MTR_7g113030 PE=4 SV=1	0	41.205	22.2571	6	8	0	1	319	36.2	6.09	Not Found	Not Found	Not Found	Not Found	Not Found	Not Found	Not Found	Not Found	Deamidated [Q302]	0	1.512	38.44	6
High	Master Protein	A0A072U5U0	Epoxide hydrolase OS=Medicago truncatula GN=MTR_7g112615 PE=4 SV=1	0	37.632	22.2571	5	7	2	1	319	36	6.62	Not Found	Not Found	Not Found	High	High	Not Found	Not Found	Not Found	Deamidated [Q302]	0	1.239	36.44	5
High	Master Protein	A0A072ULA2	Monosaccharide-H+ symporter OS=Medicago truncatula GN=MTR_4g064807 PE=4 SV=1	0	4.433	22.2222	2	7	2	1	81	8.8	6.62	High	High	High	High	High	Not Found	High	Not Found		0	2.162	15.99	2
High	Master Protein	A0A072VCX6	Transmembrane protein, putative OS=Medicago truncatula GN=MTR_1g012920 PE=4 SV=1	0	27.365	22.2222	6	7	6	1	360	40.7	8.56	High	Not Found	High	High	High	Not Found	Not Found	Not Found		0	0.823	28.19	6
High	Master Protein	G7KE90	Ubiquinol oxidase OS=Medicago truncatula GN=MTR_5g070870 PE=3 SV=1	0	27.346	22.2222	6	8	5	1	324	37.1	8.48	Not Found	High	High	High	Not Found	High	Not Found	Not Found		0	0.931	27.34	6
High	Master Protein	G7LG31	NOD3, putative OS=Medicago truncatula GN=MTR_8g039290 PE=4 SV=1	0	19.636	22.2222	5	8	5	1	360	41	6.62	Not Found	High	Not Found	High	High	High	High	Not Found		0	0.778	28.21	5
High	Master Protein	A0A072UBW2	RAB GTPase-like protein A1D OS=Medicago truncatula GN=MTR_6g079550 PE=4 SV=1	0	13.145	22.2222	4	6	3	1	216	24.4	5.72	High	High	Not Found	Not Found	High	High	High	Not Found		0	0.624	20.97	4
High	Master Protein	G7IM41	Cysteine proteinase inhibitor OS=Medicago truncatula GN=MTR_2g026040 PE=3 SV=1	0	6.198	22.2222	2	3	2	1	117	12.9	9.7	Not Found	High	High	Not Found	High	Not Found	Not Found	Not Found		0	0.668	12.04	2
High	Master Protein	Q2HW18	Cupin, RmlC-type OS=Medicago truncatula GN=MTR_7g079780 PE=4 SV=1	0	51.543	22.1983	9	17	2	1	464	53.2	5.8	Not Found	Not Found	High	High	Not Found	Not Found	Not Found	Not Found		0	1.154	80.08	9
High	Master Protein	G7JHJ9	Uncharacterized protein OS=Medicago truncatula GN=MTR_4g083250 PE=2 SV=1	0	18.101	22.1805	4	6	4	1	266	29.2	9.25	High	Not Found	Not Found	High	High	High	Not Found	Not Found		0	0.896	19.87	4
High	Master Protein	B7FKV5	Vesicle-associated-like protein OS=Medicago truncatula GN=MTR_2g089995 PE=2 SV=1	0	27.714	22.1402	7	7	7	1	271	30.5	8.9	Not Found	Not Found	Not Found	Not Found	High	High	High	Not Found		0	1.239	27.92	7
High	Master Protein	Q2MJ09	Coumarate 4-hydroxylase OS=Medicago truncatula GN=CYP73A3 PE=2 SV=1	0	53.917	22.1344	14	26	13	1	506	58.1	9.04	High	High	High	High	High	High	High	Not Found		0	2.054	92.65	14
High	Master Protein	A0A072VC68	Fasciclin-like arabinogalactan protein OS=Medicago truncatula GN=MTR_2g090765 PE=4 SV=1	0	32.384	22.0884	5	9	5	1	249	26.4	7.33	High	High	High	High	Not Found	Not Found	Not Found	Not Found		0	2.162	35.53	5
High	Master Protein	A0A072UNG6	Tubulin beta chain OS=Medicago truncatula GN=MTR_4g094535 PE=3 SV=1	0	67.233	22.0721	11	49	1	1	444	49.8	4.82	Not Found	Not Found	Not Found	Not Found	High	High	Not Found	Not Found		0	2.981	169.72	11
High	Master Protein	G7K8K5	Calcium-dependent kinase OS=Medicago truncatula GN=MTR_5g092810 PE=4 SV=2	0	77.606	22.037	13	37	8	1	540	61.3	7.8	High	High	High	Not Found	High	High	High	Medium		0	2.162	143.48	13
High	Master Protein	G7JA07	Phosphoinositide phospholipase C OS=Medicago truncatula GN=MTR_3g069280 PE=4 SV=1	0	38.354	22.028	14	29	1	1	572	64.9	5.4	Not Found	Not Found	High	Not Found	Not Found	Not Found	Not Found	Not Found		0	1.424	78.05	14
High	Master Protein	G7J0E0	Photosystem I reaction center subunit V OS=Medicago truncatula GN=MTR_3g010000 PE=4 SV=2	0	22.404	22	4	6	4	1	150	16.6	9.7	High	Not Found	High	Not Found	Medium	High	Not Found	Not Found	Deamidated [Q89]	0	2.162	25.08	4
High	Master Protein	Q155U2	SCF ubiquitin ligase, SKP1 component OS=Medicago truncatula GN=MTR_5g022730 PE=2 SV=1	0	29.436	21.9355	3	6	3	1	155	17.6	4.65	Not Found	Not Found	Not Found	Not Found	High	High	High	Not Found		0	2.162	28.66	3
High	Master Protein	Q2HUL4	Short-chain dehydrogenase/reductase OS=Medicago truncatula GN=MTR_7g083870 PE=2 SV=1	0	30.121	21.9269	4	7	4	1	301	31.8	7.75	High	High	Not Found	High	High	Not Found	Not Found	Not Found		0	0.968	30.54	4
High	Master Protein	B7FMY9	Adenine nucleotide alpha hydrolase superfamily protein OS=Medicago truncatula GN=MTR_3g116830 PE=2 SV=1	0	11.93	21.9101	3	4	3	1	178	19.6	6.42	Not Found	Not Found	High	High	Not Found	Not Found	High	Not Found		0	0.778	13.88	3
High	Master Protein	G7L523	Plant/F21F14-40 protein OS=Medicago truncatula GN=MTR_7g117970 PE=4 SV=1	0	25.333	21.8868	6	10	6	1	265	29.3	9.73	High	High	High	Not Found	High	High	High	Not Found		0	1.738	32.92	6
High	Master Protein	A0A072VMV1	RAB GTPase-like protein C2B OS=Medicago truncatula GN=MTR_1g078200 PE=4 SV=1	0	17.615	21.875	4	6	2	1	224	25	5.53	High	High	Not Found	Not Found	Not Found	Not Found	High	Not Found		0	0.668	18.51	4
High	Master Protein	Q2HW16	Cupin, RmlC-type OS=Medicago truncatula GN=MTR_7g079820 PE=4 SV=1	0	57.82	21.8684	9	19	1	1	471	53.7	5.9	Not Found	High	Not Found	Not Found	Not Found	Not Found	Not Found	Not Found		0	1.264	90.48	9
High	Master Protein	G7KSG3	Acyl carrier protein OS=Medicago truncatula GN=MTR_7g080760 PE=3 SV=1	0	21.171	21.8487	5	11	5	1	119	13.5	5.5	Not Found	High	High	High	High	High	High	Not Found		0	4.012	35.18	5
High	Master Protein	A0A072UBH5	EF hand calcium-binding family protein OS=Medicago truncatula GN=MTR_6g079570 PE=4 SV=1	0	16.806	21.8391	4	5	4	1	174	19.3	4.53	Not Found	Not Found	Not Found	High	High	High	Not Found	Not Found		0	1.154	16.52	4
High	Master Protein	G7JEF5	NDH-dependent cyclic electron flow protein OS=Medicago truncatula GN=MTR_4g007080 PE=4 SV=1	0	59.336	21.822	9	22	9	1	472	52.6	6.64	High	High	High	High	High	High	Not Found	Not Found		0	2.008	88.29	9
High	Master Protein	G7IY20	Syntaxin protein OS=Medicago truncatula GN=MTR_3g052210 PE=4 SV=1	0	16.209	21.8107	4	4	1	1	243	27.5	4.92	Not Found	Not Found	Not Found	High	Not Found	Not Found	Medium	Not Found		0	0.668	13	4
High	Master Protein	G7K569	Protein transporter OS=Medicago truncatula GN=MTR_5g007480 PE=4 SV=1	0	22.553	21.8045	7	7	7	1	399	44.4	4.79	Not Found	Not Found	Not Found	High	Not Found	High	High	Not Found		0	0.859	21.45	7
High	Master Protein	G7J1N8	High chlorophyll fluorescence 153 protein OS=Medicago truncatula GN=MTR_3g023160 PE=4 SV=1	0	8.724	21.8045	1	3	1	1	133	14.9	4.74	Not Found	Not Found	Not Found	Not Found	High	High	High	Not Found		0	0.468	18.17	1
High	Master Protein	G7LHC6	Tubulin beta chain OS=Medicago truncatula GN=MTR_8g098360 PE=3 SV=1	0	68.318	21.7978	10	43	2	1	445	49.9	4.94	Not Found	High	Not Found	Not Found	High	Not Found	Not Found	Not Found		0	2.282	156.41	10
High	Master Protein	G7J960	3-ketoacyl-CoA synthase OS=Medicago truncatula GN=MTR_3g105550 PE=3 SV=1	0	28.287	21.7877	10	19	9	1	537	60.6	8.72	High	High	High	High	High	High	High	High		0	1.062	59.39	10
High	Master Protein	G8A093	Sulfurtransferase OS=Medicago truncatula GN=MTR_2g067080 PE=4 SV=1	0	40.763	21.7848	5	6	5	1	381	41.9	6.86	High	High	Not Found	High	Not Found	High	Not Found	Not Found		0	0.668	32.21	5
High	Master Protein	G7K998	Phosphotransferase OS=Medicago truncatula GN=MTR_5g009000 PE=3 SV=1	0	49.625	21.7742	9	19	7	1	496	53.9	7.12	High	Not Found	High	High	High	High	Not Found	Not Found		0	1.207	67.49	9
High	Master Protein	A0A072UCB4	Vacuolar H+-ATPase subunit C OS=Medicago truncatula GN=MTR_7g083720 PE=4 SV=1	0	36.884	21.7617	7	14	7	1	386	43.8	5.78	High	High	High	High	High	Not Found	Not Found	Not Found		0	1.154	49.28	7
High	Master Protein	G7INF3	Choline-phosphate cytidylyltransferase OS=Medicago truncatula GN=MTR_2g035810 PE=2 SV=1	0	20.104	21.7544	4	5	3	1	285	33.4	5.78	Not Found	Not Found	Not Found	High	High	High	Not Found	Not Found		0	0.778	22.75	4
High	Master Protein	G7K4R2	Heat shock protein 81-2 OS=Medicago truncatula GN=MTR_5g096430 PE=3 SV=1	0	120.012	21.7454	20	49	13	1	699	80.1	5.03	High	High	High	High	High	High	Not Found	Not Found		0	2.899	194.23	20
High	Master Protein	G7JTA3	Protein transporter Sec61 subunit gamma-like protein OS=Medicago truncatula GN=MTR_4g127150 PE=3 SV=1	0	8.522	21.7391	2	3	2	1	69	7.7	9.72	Not Found	Not Found	High	High	High	Not Found	Not Found	Not Found		0	1.512	11.93	2
High	Master Protein	A0A072TQ03	Calcium-dependent lipid-binding (CaLB domain) family protein OS=Medicago truncatula GN=MTR_8g031270 PE=4 SV=1	0	95.332	21.7348	17	31	15	1	1003	114.3	9.09	Not Found	Not Found	High	High	High	High	Not Found	Not Found		0	1.009	125.83	17
High	Master Protein	G7JI82	Bacterial long-chain fatty acid CoA synthetase OS=Medicago truncatula GN=MTR_3g082660 PE=4 SV=1	0	46.474	21.7331	12	21	10	1	727	79.4	7.49	High	High	High	High	Not Found	High	Not Found	Not Found		0	0.874	69.56	12
High	Master Protein	G7J081	D-isomer specific 2-hydroxyacid dehydrogenase domain protein OS=Medicago truncatula GN=MTR_3g005970 PE=3 SV=1	0	21.362	21.7277	5	6	5	1	382	42.4	8.92	Not Found	High	Not Found	High	High	High	Not Found	Not Found		0	0.688	24.6	5
High	Master Protein	G7JJ87	Lactoylglutathione lyase-like protein OS=Medicago truncatula GN=MTR_4g132270 PE=4 SV=1	0	32.384	21.7105	6	13	2	1	304	33.9	5.35	Not Found	Not Found	Not Found	Not Found	High	High	Not Found	Not Found	Deamidated [R268; Q269]	0	1.336	44.78	6
High	Master Protein	I3SPW7	RAB GTPase-like protein A1D OS=Medicago truncatula GN=MTR_4g088090 PE=2 SV=1	0	17.031	21.659	4	4	2	1	217	24.1	5.69	Not Found	Not Found	Not Found	Not Found	Not Found	High	High	Not Found		0	0.668	12.69	4
High	Master Protein	A0A072V0M0	PGR5-like protein 1A OS=Medicago truncatula GN=MTR_4g102440 PE=4 SV=1	0	102.564	21.6301	13	78	11	1	319	35.5	5.06	High	High	High	High	High	High	High	Not Found		0	22.714	312.17	13
High	Master Protein	A0A072UKD3	Histone H2A OS=Medicago truncatula GN=MTR_4g064005 PE=3 SV=1	0	15.034	21.6216	2	4	1	1	148	15.9	10.64	High	Not Found	Not Found	Not Found	Not Found	Not Found	Not Found	Not Found		0	1.512	16.3	2
High	Master Protein	A0A072VCV1	Phototropin-2 protein OS=Medicago truncatula GN=MTR_2g095980 PE=4 SV=1	0	74.372	21.5909	18	29	16	1	968	109.6	7.46	High	High	High	High	High	High	High	Not Found	Phospho [S9]; Deamidated [R273]	1	1.127	96.09	18
High	Master Protein	Q7XJ35	Histone H1 OS=Medicago truncatula GN=His1 PE=3 SV=1	0	41.829	21.5686	4	25	4	1	306	31.3	10.73	High	High	Not Found	High	High	High	Medium	Not Found	Phospho [T2; S3; S4; T9; S11; T16]	6	1.239	84.78	4
High	Master Protein	G7LJ51	Cytochrome P450 family 72 protein OS=Medicago truncatula GN=MTR_8g042000 PE=3 SV=1	0	67.298	21.5649	11	23	8	1	524	59.3	8.57	High	High	High	High	High	High	Not Found	Not Found	Deamidated [Q302]	0	1.656	90.94	11
High	Master Protein	B7FGL4	60S ribosomal protein L31B OS=Medicago truncatula GN=MTR_8g101980 PE=2 SV=1	0	7.584	21.4876	2	5	2	1	121	13.9	9.76	High	Medium	High	High	High	Not Found	Not Found	Not Found		0	0.778	15.87	2
High	Master Protein	G7KAQ8	Calmodulin-domain kinase CDPK protein OS=Medicago truncatula GN=MTR_5g009830 PE=4 SV=1	0	74.749	21.47	10	19	5	1	517	58.7	6.92	Not Found	High	High	Not Found	High	High	High	Not Found		0	1.783	81.41	10
High	Master Protein	G7K325	Synaptobrevin-like protein OS=Medicago truncatula GN=MTR_5g089370 PE=3 SV=1	0	32.642	21.4612	8	30	5	1	219	24.9	9.32	High	High	High	High	High	High	High	Not Found		0	3.217	86.18	8
High	Master Protein	A0A072V9P1	Carboxyl-terminal peptidase OS=Medicago truncatula GN=MTR_2g073050 PE=4 SV=1	0	5.167	21.4286	1	2	1	1	70	7.7	5.91	High	High	Not Found	Not Found	Not Found	Not Found	Not Found	Not Found		0	0.585	7.13	1
High	Master Protein	G7IRZ4	Import inner membrane translocase protein OS=Medicago truncatula GN=MTR_2g097870 PE=2 SV=1	0	7.206	21.4286	1	1	1	1	84	9.5	6.01	High	Not Found	Not Found	Not Found	Not Found	Not Found	Not Found	Not Found		0	0.389	6.11	1
High	Master Protein	A0A072TTP2	Lipoxygenase OS=Medicago truncatula GN=MTR_8g080230 PE=3 SV=1	0	92.374	21.3974	18	33	18	1	916	102.9	7.39	High	High	High	High	High	High	High	High	Deamidated [Q65]	0	1.555	94.62	18
High	Master Protein	G7KLT7	Membrane-anchored ubiquitin-fold protein 4 OS=Medicago truncatula GN=MTR_6g013820 PE=2 SV=1	0	7.549	21.3675	2	2	2	1	117	12.7	7.65	Not Found	High	Not Found	High	Not Found	Not Found	Not Found	Not Found		0	0.585	6.78	2
High	Master Protein	G7JVC7	Uncharacterized protein OS=Medicago truncatula GN=MTR_4g114050 PE=2 SV=1	0	13.618	21.3592	1	1	1	1	103	11	10.42	Not Found	Not Found	Not Found	High	Not Found	Not Found	Not Found	Not Found		0	0.468	7.31	1
High	Master Protein	A0A072V2W0	Stress responsive A/B barrel domain protein OS=Medicago truncatula GN=MTR_4g125530 PE=4 SV=1	0	20.7	21.3483	5	8	5	1	267	29.8	7.37	Not Found	Not Found	High	High	High	High	Not Found	Not Found		0	1.069	27.58	5
High	Master Protein	G7K2N4	Lectin receptor kinase OS=Medicago truncatula GN=MTR_5g025020 PE=4 SV=2	0	43.295	21.3467	13	24	12	1	698	77.7	6.65	High	High	High	High	High	High	Medium	Not Found		0	1.198	67.22	13
High	Master Protein	G7JJX3	V-type proton ATPase proteolipid subunit OS=Medicago truncatula GN=MTR_4g072050 PE=2 SV=1	0	10.793	21.3415	4	15	1	1	164	16.5	8.46	Not Found	High	High	High	High	Not Found	Not Found	Not Found		0	1.512	40.31	4
High	Master Protein	G7JW47	V-type proton ATPase proteolipid subunit OS=Medicago truncatula GN=MTR_5g021690 PE=2 SV=1	0	10.831	21.3415	4	15	1	1	164	16.5	8.46	High	High	High	High	High	Not Found	Not Found	Not Found		0	1.512	40.6	4
High	Master Protein	A0A072UFQ9	Substrate carrier family protein OS=Medicago truncatula GN=MTR_4g005330 PE=3 SV=1	0	28.662	21.3296	6	9	6	1	361	39.4	9.07	Not Found	High	High	High	High	High	Not Found	Not Found		0	0.957	28.61	6
High	Master Protein	G7KN60	Small GTPase family RAB protein OS=Medicago truncatula GN=MTR_6g021790 PE=4 SV=1	0	18.95	21.327	4	11	2	1	211	23.2	7.34	Not Found	High	High	High	High	Not Found	Not Found	Not Found		0	0.968	35.92	4
High	Master Protein	G7J579	FH protein interacting protein FIP1, putative OS=Medicago truncatula GN=MTR_3g100750 PE=4 SV=1	0	21.003	21.3178	5	7	5	1	258	28.1	6.29	Not Found	Not Found	High	High	High	High	Not Found	Not Found		0	1.069	23.45	5
High	Master Protein	G7I4W6	S-adenosylmethionine-dependent methyltransferase, putative OS=Medicago truncatula GN=MTR_1g075900 PE=4 SV=2	0	48.543	21.3141	12	23	10	1	624	70.5	6.49	High	High	High	High	Medium	High	Medium	Not Found		0	1.198	71.26	12
High	Master Protein	G7KVS0	E1 subunit-like 2-oxoglutarate dehydrogenase OS=Medicago truncatula GN=MTR_7g023770 PE=4 SV=2	0	100.271	21.3099	18	41	18	1	1023	115.7	6.95	High	High	High	High	High	High	High	Not Found		0	1.417	168.41	18
High	Master Protein	G7JLW6	Defective in exine formation protein OS=Medicago truncatula GN=MTR_4g014960 PE=4 SV=2	0	94.277	21.3058	11	15	11	1	873	97.2	4.88	Not Found	Not Found	High	High	High	High	High	Not Found		0	0.866	89.25	11
High	Master Protein	G7JFG2	Transmembrane protein, putative OS=Medicago truncatula GN=MTR_4g115740 PE=4 SV=2	0	10.105	21.2963	3	3	3	1	108	11.9	8.59	Not Found	Not Found	Not Found	Not Found	High	High	High	Not Found		0	1.371	9.62	3
High	Master Protein	G7KRG6	Zinc finger CCCH domain protein OS=Medicago truncatula GN=MTR_7g079840 PE=4 SV=1	0	27.995	21.2919	5	6	5	1	418	46	7.83	Not Found	High	Not Found	High	Not Found	High	High	Not Found		0	0.585	24.24	5
High	Master Protein	A0A072TEX8	Glycoside hydrolase family 18 protein OS=Medicago truncatula GN=MTR_0443s0040 PE=3 SV=1	0	39.269	21.2903	7	21	7	1	310	36	5.78	High	High	High	High	High	High	Not Found	Not Found		0	3.217	68.44	7
High	Master Protein	A2Q5W0	Tubulin alpha chain OS=Medicago truncatula GN=aTUB PE=3 SV=1	0	47.353	21.286	10	29	2	1	451	49.8	5.1	Not Found	Not Found	High	High	Not Found	Not Found	Not Found	Not Found	Deamidated [R390]	0	3.16	104.11	10
High	Master Protein	A2Q6E4	Protein phosphatase 2C-like OS=Medicago truncatula GN=MTR_5g063940 PE=4 SV=1	0	19.611	21.2766	5	6	4	1	282	30.7	8.15	Not Found	Not Found	High	High	High	Not Found	High	Not Found	Deamidated [Q194]	0	0.896	22.4	5
High	Master Protein	G7L779	NAD(P)-binding rossmann-fold protein OS=Medicago truncatula GN=MTR_8g087310 PE=4 SV=2	0	51.076	21.273	11	15	11	1	597	65.9	8.47	High	High	High	High	High	Medium	Not Found	Not Found		0	0.884	54.13	11
High	Master Protein	G7KET9	PGR5-like protein 1A OS=Medicago truncatula GN=MTR_5g011220 PE=4 SV=2	0	38.145	21.2698	8	31	6	1	315	34.7	5.12	High	High	Not Found	High	High	High	High	High		0	2.793	103.68	8
High	Master Protein	A0A072TJV4	Photosystem II CP47 reaction center protein OS=Medicago truncatula GN=MTR_0002s0740 PE=3 SV=1	0	83.325	21.2598	11	89	1	1	508	56.1	6.54	Medium	Medium	Medium	Medium	Not Found	Not Found	Not Found	Not Found	Deamidated [R18; R272; Q274; Q281; Q282]	0	9	283.93	11
High	Master Protein	A0A072U2L5	Ozone-responsive stress-like protein OS=Medicago truncatula GN=MTR_7g091770 PE=4 SV=1	0	17.207	21.25	2	12	2	1	80	8.8	8.48	High	High	High	High	High	Not Found	Not Found	Not Found	Deamidated [Q70]	0	9	45.93	2
High	Master Protein	G7J8Z9	Sigma 54 modulation protein/S30EA ribosomal protein OS=Medicago truncatula GN=MTR_3g092720 PE=4 SV=2	0	34.082	21.2465	7	9	7	1	353	40	9.23	Not Found	Not Found	High	High	High	High	High	Not Found		0	0.817	32.94	7
High	Master Protein	G7J4L3	NADPH--cytochrome P450 reductase OS=Medicago truncatula GN=MTR_3g100160 PE=2 SV=1	0	89.379	21.2428	11	35	10	1	692	76.8	5.24	High	High	High	High	High	High	High	High	Deamidated [Q128]	0	1.54	147.23	11
High	Master Protein	G7I8J4	Syntaxin of plants 122 protein OS=Medicago truncatula GN=MTR_1g056560 PE=3 SV=1	0	39.92	21.2389	7	10	7	1	339	37.7	7.61	High	Not Found	Not Found	High	High	High	High	High	Phospho [S8]	0	1.683	40.52	7
High	Master Protein	A0A072UFT1	Metal tolerance-like protein OS=Medicago truncatula GN=MTR_4g008150 PE=4 SV=1	0	33.828	21.2329	9	19	9	1	438	48.5	7.31	High	High	High	High	High	High	High	Not Found	Carboxymethyl [K337]	0	1.512	57.38	9
High	Master Protein	A0A072V216	Tryptophan-tRNA ligase OS=Medicago truncatula GN=MTR_3g110360 PE=3 SV=1	0	33.015	21.2121	5	6	5	1	396	43.9	8.34	High	Not Found	Not Found	High	High	Not Found	Not Found	Not Found		0	0.701	28.57	5
High	Master Protein	G7L0M8	Endoplasmic reticulum [ER]-type calcium ATPase, putative OS=Medicago truncatula GN=MTR_7g100110 PE=3 SV=2	0	111.311	21.1754	22	53	21	1	1072	117.7	5.4	High	High	High	High	High	High	High	Not Found		0	1.531	209.21	22
High	Master Protein	G7LB10	ATP-dependent zinc metalloprotease FTSH protein OS=Medicago truncatula GN=MTR_8g056860 PE=4 SV=1	0	102.934	21.1538	21	41	21	1	988	112.9	6.47	High	High	High	High	High	High	High	Not Found		0	1.593	157.09	21
High	Master Protein	A0A072V2E6	Ubiquinol-cytochrome C reductase complex 6.7 kDa protein, putative OS=Medicago truncatula GN=MTR_3g093810 PE=4 SV=1	0.001	3.08	21.1538	1	1	1	1	52	5.9	9.32	Not Found	Not Found	Not Found	Not Found	Not Found	High	Not Found	Not Found		0	1.154	3.79	1
High	Master Protein	G7JTN1	60S ribosomal L35-like protein OS=Medicago truncatula GN=MTR_4g062410 PE=3 SV=1	0	6.156	21.1382	3	5	2	1	123	14.2	10.71	Not Found	Not Found	Not Found	Not Found	High	Not Found	Not Found	Not Found		0	2.728	11.04	3
High	Master Protein	G7JBT5	Clathrin heavy chain OS=Medicago truncatula GN=MTR_3g070940 PE=3 SV=2	0	216.521	21.1144	32	62	11	1	1705	193	5.5	High	Not Found	High	High	High	High	High	Not Found		0	1.523	270.45	32
High	Master Protein	G7JAT1	Long-chain-fatty-acid CoA ligase (AMP-forming) OS=Medicago truncatula GN=MTR_3g084450 PE=4 SV=1	0	72.183	21.1111	15	30	14	1	720	80.2	8.72	High	High	High	High	High	High	High	Not Found		0	1.371	102.38	15
High	Master Protein	A0A072UPN7	Cytochrome P450 family protein OS=Medicago truncatula GN=MTR_4g088400 PE=3 SV=1	0	50.814	21.1027	11	21	11	1	526	59.7	7.61	High	High	High	High	High	High	High	High		0	1.581	65.17	11
High	Master Protein	G7JK09	Polyadenylate-binding protein OS=Medicago truncatula GN=MTR_4g085540 PE=3 SV=1	0	66.628	21.1009	9	15	7	1	654	71	8.25	Not Found	High	Not Found	High	High	Not Found	Not Found	Not Found		0	1.154	77.52	9
High	Master Protein	G7JQ45	AMP deaminase OS=Medicago truncatula GN=MTR_4g016980 PE=4 SV=1	0	85.625	21.0778	15	32	14	1	835	95.1	6.7	High	High	High	High	High	High	High	Not Found	Phospho [S198; S200; S275; T276]	0	1.31	108.38	15
High	Master Protein	G7I684	ER membrane protein complex subunit-like protein OS=Medicago truncatula GN=MTR_1g079890 PE=2 SV=1	0	33.936	21.0526	4	13	4	1	247	28	8.65	High	High	High	High	High	Not Found	High	Not Found		0	1.054	68.15	4
High	Master Protein	G7IYL4	DUF842 domain protein OS=Medicago truncatula GN=MTR_3g009130 PE=4 SV=1	0	10.601	21.0526	2	2	2	1	152	17.3	5.99	Not Found	Medium	Not Found	Not Found	High	Not Found	Not Found	Not Found		0	0.778	9.25	2
High	Master Protein	G7IGB8	Calcium-transporting ATPase OS=Medicago truncatula GN=MTR_2g038310 PE=3 SV=2	0	115.845	21.043	16	34	12	1	1093	119.1	7.28	High	High	High	High	High	High	High	Not Found		0	1.106	149.01	16
High	Master Protein	G7IT44	ATP-citrate synthase alpha chain protein OS=Medicago truncatula GN=MTR_2g062920 PE=4 SV=1	0	32.478	21.0402	7	12	4	1	423	46.5	5.48	High	Not Found	High	High	High	Not Found	Not Found	Not Found		0	1.228	45.93	7
High	Master Protein	G7IYD2	Transmembrane protein, putative OS=Medicago truncatula GN=MTR_3g005290 PE=4 SV=1	0	41.208	21	4	12	4	1	300	33.2	5.41	Not Found	Not Found	High	High	High	High	High	Not Found		0	1.448	58.56	4
High	Master Protein	G7L6W7	Sad1/UNC-like protein OS=Medicago truncatula GN=MTR_8g043510 PE=4 SV=1	0	41.12	20.9957	14	19	14	1	462	50.4	8.16	High	High	High	Not Found	High	High	High	Not Found		0	1.412	55.45	14
High	Master Protein	G7L1V2	Aldo/keto reductase family oxidoreductase OS=Medicago truncatula GN=MTR_7g114970 PE=4 SV=1	0	21.126	20.9913	6	6	5	1	343	37.9	6.46	Not Found	Not Found	Not Found	High	High	High	High	Not Found		0	0.778	19.99	6
High	Master Protein	G7JFK1	Heat shock 70 kDa protein OS=Medicago truncatula GN=MTR_4g130540 PE=3 SV=1	0	97.061	20.9801	15	36	2	1	653	71.5	5.39	Not Found	Not Found	Not Found	High	High	High	Not Found	Not Found		0	2.36	138.91	15
High	Master Protein	G7LJD5	Phototropin-2 protein OS=Medicago truncatula GN=MTR_8g070530 PE=4 SV=2	0	94.793	20.9626	15	35	15	1	935	104.8	7.53	High	High	High	High	High	High	High	Not Found		0	1.319	133.9	15
High	Master Protein	G4W9I5	Glutamate 1-semialdehyde aminotransferase OS=Medicago truncatula GN=GSA PE=2 SV=1	0	36.09	20.9402	6	12	6	1	468	49.7	6.57	High	High	High	High	High	Not Found	Not Found	Not Found		0	0.701	60.45	6
High	Master Protein	G7KSR8	DnaJ heat shock family protein OS=Medicago truncatula GN=MTR_7g109340 PE=2 SV=1	0	33.559	20.9302	6	9	6	1	344	38.7	6.8	High	Not Found	Not Found	High	High	High	High	Not Found		0	0.874	34.08	6
High	Master Protein	G7IHN1	Histone H2A OS=Medicago truncatula GN=MTR_2g096570 PE=2 SV=1	0	11.588	20.915	2	4	1	1	153	16.3	10.86	High	Not Found	Not Found	Not Found	Not Found	Not Found	Not Found	Not Found		0	1.154	14.81	2
High	Master Protein	A0A072VFF1	Zinc-ribbon domain protein OS=Medicago truncatula GN=MTR_1g029990 PE=4 SV=1	0	7.345	20.9091	1	1	1	1	110	12.5	7.88	Not Found	High	Not Found	Not Found	Not Found	Not Found	Not Found	Not Found		0	0.389	6.23	1
High	Master Protein	A0A072VM16	Prohibitin complex protein OS=Medicago truncatula GN=MTR_2g090760 PE=4 SV=1	0	20.197	20.9059	6	18	1	1	287	31.4	9.64	Not Found	Medium	Not Found	Medium	Not Found	Not Found	Not Found	Not Found		0	2.162	51.35	6
High	Master Protein	G7KCF3	Syntaxin of plants protein OS=Medicago truncatula GN=MTR_5g029650 PE=3 SV=2	0	29.983	20.8955	3	8	1	1	268	29.7	5.82	Not Found	Not Found	Not Found	Not Found	High	Not Found	Not Found	Not Found		0	0.719	38.08	3
High	Master Protein	G7K581	Cytochrome P450 family protein OS=Medicago truncatula GN=MTR_5g016440 PE=3 SV=1	0	37.456	20.8081	10	13	9	1	495	56.8	8.57	High	High	High	High	High	High	Not Found	Not Found		0	0.968	47.23	10
High	Master Protein	G7LA71	Adipocyte plasma membrane-associated-like protein OS=Medicago truncatula GN=MTR_8g074270 PE=4 SV=1	0	71.864	20.8	8	18	8	1	375	41.4	5.97	Not Found	High	High	High	High	High	Not Found	Not Found		0	2.548	100.4	8
High	Master Protein	G7JLS7	Ferritin OS=Medicago truncatula GN=MTR_4g014540 PE=3 SV=1	0	33.176	20.8	5	9	4	1	250	28.1	6.04	Not Found	High	High	High	Not Found	Not Found	Not Found	Not Found		0	1.512	45.35	5
High	Master Protein	G7K7U7	Transmembrane protein, putative OS=Medicago truncatula GN=MTR_5g008220 PE=4 SV=1	0	33.524	20.7843	4	15	4	1	255	29	7.36	High	Not Found	High	High	High	High	High	Not Found		0	1.894	67.48	4
High	Master Protein	A0A072VB19	Calcium-binding EF-hand protein OS=Medicago truncatula GN=MTR_2g078240 PE=3 SV=1	0	139.838	20.7675	12	55	12	1	443	49.4	5.78	High	High	High	High	High	High	High	Not Found		0	11.452	283.15	12
High	Master Protein	A0A072URW6	GDP-fucose protein O-fucosyltransferase OS=Medicago truncatula GN=MTR_4g008200 PE=4 SV=1	0	39.29	20.7637	8	18	8	1	419	46.8	6.23	High	High	High	High	High	High	High	Not Found		0	1.512	69.27	8
High	Master Protein	A0A072UQP0	Cytochrome P450 family protein OS=Medicago truncatula GN=MTR_4g102280 PE=3 SV=1	0	48.868	20.7364	12	23	12	1	516	58.1	6.43	High	High	High	High	High	High	High	Not Found		0	1.297	75.59	12
High	Master Protein	G7KGQ5	Oxygen-evolving enhancer protein OS=Medicago truncatula GN=MTR_5g041910 PE=4 SV=1	0	33.234	20.6897	7	20	7	1	261	30.5	9.96	High	High	High	High	High	High	High	Not Found		0	2.875	67.23	7
High	Master Protein	A0A072VNB6	Uncharacterized protein OS=Medicago truncatula GN=MTR_1g084990 PE=4 SV=1	0	76.418	20.6531	16	17	16	1	1133	123.9	4.23	Not Found	Not Found	Not Found	Not Found	Not Found	High	High	High		0	0.551	64.91	16
High	Master Protein	G7IM71	RAB GTPase-like protein A1D OS=Medicago truncatula GN=MTR_2g083860 PE=4 SV=1	0	23.242	20.6422	3	7	2	1	218	24.1	6.09	Not Found	Not Found	High	Not Found	High	High	Not Found	Not Found		0	0.719	28.73	3
High	Master Protein	G7IFY7	NADH-ubiquinone oxidoreductase 10.5 kDa subunit OS=Medicago truncatula GN=MTR_2g034290 PE=2 SV=1	0.001	3.118	20.6186	3	5	3	1	97	10.9	9.33	Medium	High	High	Not Found	Not Found	Not Found	High	Not Found		0	2.162	9.51	3
High	Master Protein	G7K058	2-phytyl-1,4-beta-naphthoquinone methyltransferase, chloroplastic OS=Medicago truncatula GN=MENG PE=3 SV=2	0	15.275	20.6107	4	5	4	1	262	29.3	6.35	High	High	Not Found	High	Not Found	Not Found	Not Found	Not Found		0	0.719	18.87	4
High	Master Protein	A0A072USY8	LRR receptor-like kinase OS=Medicago truncatula GN=MTR_4g020070 PE=4 SV=1	0	36.414	20.6061	10	16	4	1	495	55.8	6.43	Not Found	High	Not Found	High	Not Found	Medium	Not Found	High		0	1.062	50.39	10
High	Master Protein	G7IF30	Formate-tetrahydrofolate ligase OS=Medicago truncatula GN=MTR_1g116140 PE=3 SV=2	0	60.797	20.6009	12	24	12	1	699	74.7	7.43	High	High	High	High	High	High	High	Not Found		0	1.322	85.17	12
High	Master Protein	G7IEX3	Vacuolar-sorting receptor-like protein OS=Medicago truncatula GN=MTR_1g106940 PE=4 SV=2	0	49.294	20.5696	10	15	8	1	632	69.5	5.55	Not Found	High	High	High	Not Found	Not Found	High	Not Found	Deamidated [R384]	0	0.855	51.48	10
High	Master Protein	G7IAZ2	2-isopropylmalate synthase OS=Medicago truncatula GN=MTR_1g116500 PE=3 SV=1	0	67.534	20.5686	10	21	10	1	598	65	6.4	High	High	High	High	High	Not Found	Not Found	Not Found		0	1.246	94.04	10
High	Master Protein	A0A072TLT0	Transmembrane 9 superfamily member OS=Medicago truncatula GN=MTR_8g016270 PE=3 SV=1	0	55.696	20.5247	11	27	9	1	648	74.5	8.18	High	High	High	High	High	High	Not Found	Not Found		0	1.512	84.76	11
High	Master Protein	G7K4Y9	Aldo/keto reductase family oxidoreductase OS=Medicago truncatula GN=MTR_5g097900 PE=4 SV=1	0	15.234	20.5128	6	11	6	1	312	34.9	6.33	High	High	High	High	High	Not Found	High	Not Found		0	0.874	29.88	6
High	Master Protein	Q8L8A0	Calcium-transporting ATPase OS=Medicago truncatula GN=MCA5 PE=2 SV=1	0	68.812	20.5128	15	38	9	1	1014	110.7	6	High	High	High	High	High	High	Not Found	Not Found		0	1.125	154.53	15
High	Master Protein	G7JUK3	Synaptobrevin-like protein OS=Medicago truncatula GN=MTR_4g022470 PE=3 SV=2	0.001	2.743	20.5128	2	2	1	1	117	13.3	6.19	Not Found	Not Found	Medium	Not Found	Not Found	Not Found	Not Found	Not Found		0	1.154	2.89	2
High	Master Protein	G7JQA0	ATP-dependent Clp protease proteolytic subunit OS=Medicago truncatula GN=MTR_4g034690 PE=3 SV=2	0	25	20.5128	4	7	4	1	195	21.9	4.73	Not Found	Not Found	High	High	High	High	Not Found	Not Found		0	1.276	28.29	4
High	Master Protein	G7JJK0	Non-specific lipid-transfer protein OS=Medicago truncatula GN=MTR_4g029390 PE=2 SV=1	0	8.648	20.5128	3	7	3	1	117	11.8	9.29	High	High	High	Not Found	High	High	Not Found	Not Found		0	1.154	26.17	3
High	Master Protein	G7KN56	PPR containing plant-like protein OS=Medicago truncatula GN=MTR_6g021740 PE=4 SV=1	0	45.429	20.4955	7	11	7	1	444	50.5	7.96	Not Found	High	High	High	High	Not Found	High	Not Found		0	0.848	54.18	7
High	Master Protein	I3S3J8	Gamma-secretase subunit Aph-1, putative OS=Medicago truncatula GN=MTR_4g067050 PE=2 SV=1	0	28.143	20.4819	7	12	7	1	249	27.3	9.47	High	High	High	High	High	Not Found	Not Found	Not Found		0	4.337	41.46	7
High	Master Protein	G7JWT4	14-3-like protein GF14 OS=Medicago truncatula GN=MTR_5g044160 PE=3 SV=1	0	22.173	20.4633	5	14	3	1	259	29.5	4.93	Not Found	Not Found	Not Found	High	High	High	High	Not Found		0	1.154	35.02	5
High	Master Protein	G7K6V0	Methyltransferase PMT16, putative OS=Medicago truncatula GN=MTR_5g026930 PE=4 SV=1	0	57.195	20.4013	10	16	9	1	598	68.5	8.68	High	High	High	High	High	High	Not Found	High		0	0.753	61.63	10
High	Master Protein	G7LIY0	Lipoxygenase OS=Medicago truncatula GN=MTR_8g018550 PE=3 SV=1	0	69.883	20.3917	15	29	10	1	868	97.7	6.29	High	High	High	High	High	High	Not Found	High	Deamidated [Q362; Q369; Q824]	0	1.031	100.11	15
High	Master Protein	G7JQF7	Acyl-CoA dehydrogenase OS=Medicago truncatula GN=MTR_4g060480 PE=2 SV=1	0	37.269	20.3837	6	9	6	1	417	45.5	6.96	High	High	High	Medium	High	Not Found	High	Not Found		0	0.905	41.85	6
High	Master Protein	G7JZK0	Asparagine synthetase [glutamine-hydrolyzing] protein OS=Medicago truncatula GN=MTR_5g071360 PE=4 SV=1	0	82.117	20.3767	12	38	6	1	584	65.8	6.39	High	High	High	High	High	High	Not Found	Not Found		0	1.865	136.49	12
High	Master Protein	I3T547	Emp24/gp25L/p24 family protein OS=Medicago truncatula GN=MTR_4g082315 PE=2 SV=1	0	32.073	20.3704	4	9	4	1	216	24.8	6.54	Not Found	Not Found	Not Found	High	High	High	High	Not Found		0	2.511	38.26	4
High	Master Protein	G7J5W0	Prolyl 4-hydroxylase alpha-like protein OS=Medicago truncatula GN=MTR_3g114670 PE=4 SV=1	0	31.143	20.3571	3	5	2	1	280	31.8	8.21	Not Found	Not Found	High	Not Found	High	High	Not Found	Not Found		0	0.719	24.81	3
High	Master Protein	G7LD03	FMP32-like protein OS=Medicago truncatula GN=MTR_8g076260 PE=4 SV=1	0	19.306	20.332	4	6	3	1	241	27	8.43	High	Not Found	Not Found	Not Found	High	High	Not Found	Not Found		0	1.512	23.23	4
High	Master Protein	G7JVC5	NADH-cytochrome b5 reductase OS=Medicago truncatula GN=MTR_4g114030 PE=3 SV=1	0	29.33	20.3077	6	9	6	1	325	35.9	8.68	Not Found	High	High	High	High	Not Found	Not Found	Not Found		0	1.228	26.2	6
High	Master Protein	A0A072UXM4	Asparagine synthetase [glutamine-hydrolyzing] protein OS=Medicago truncatula GN=MTR_3g464580 PE=4 SV=1	0	71.777	20.3072	11	22	4	1	586	66.4	6.47	High	Not Found	High	High	Not Found	High	Not Found	Not Found		0	1.738	75.84	11
High	Master Protein	B7FN46	RAB GTPase-like protein A1D OS=Medicago truncatula GN=MTR_4g012940 PE=2 SV=1	0	17.322	20.2899	4	9	3	1	207	23.3	5.74	High	High	High	High	High	High	Not Found	Medium	Deamidated [R198]	0	1.254	23.76	4
High	Master Protein	G7JR15	ABC transporter B family protein OS=Medicago truncatula GN=MTR_4g124040 PE=4 SV=1	0	129.622	20.18	24	52	10	1	1333	144	7.71	High	High	High	High	High	High	High	Not Found	Deamidated [Q383; Q395]	0	1.195	187.27	24
High	Master Protein	G7JU40	Serine/Threonine kinase family protein OS=Medicago truncatula GN=MTR_4g112900 PE=4 SV=1	0	36.959	20.1754	6	13	6	1	342	38.1	6.76	Not Found	High	High	High	High	High	Not Found	Not Found		0	1.955	48.69	6
High	Master Protein	B7FIZ6	Thioredoxin OS=Medicago truncatula GN=MTR_2g010750 PE=2 SV=1	0	11.66	20.1613	4	9	4	1	124	13.9	4.74	Not Found	High	High	High	High	Not Found	Not Found	Not Found		0	4.179	29.38	4
High	Master Protein	G7KX59	Lipid transfer protein OS=Medicago truncatula GN=MTR_7g072980 PE=3 SV=2	0	12.221	20.1439	3	6	3	1	139	14.9	6.23	High	High	High	High	High	High	Not Found	Not Found		0	1.683	24.66	3
High	Master Protein	G7KRJ7	DUF2358 family protein OS=Medicago truncatula GN=MTR_7g080220 PE=4 SV=1	0	95.898	20.1299	6	21	6	1	308	33.9	6.93	High	High	High	High	Not Found	High	High	Not Found	Deamidated [R58]	0	3.084	139.31	6
High	Master Protein	A0A072V1D8	Alpha/beta fold hydrolase OS=Medicago truncatula GN=MTR_3g093570 PE=4 SV=1	0	32.439	20.1285	7	9	7	1	467	51.7	8.5	High	High	Not Found	Not Found	High	High	High	Not Found		0	0.682	34.14	7
High	Master Protein	G7K5Z4	Serine hydroxymethyltransferase OS=Medicago truncatula GN=MTR_5g067060 PE=3 SV=1	0	12.765	20.1183	8	17	1	1	507	56.2	7.69	Not Found	Not Found	Not Found	Not Found	Not Found	Not Found	High	Not Found		0	0.874	48.34	8
High	Master Protein	B7FGM0	Type II peroxiredoxin OS=Medicago truncatula GN=MTR_2g022660 PE=2 SV=1	0	10.556	20.1005	3	3	3	1	199	21.5	8.35	Not Found	Not Found	High	Not Found	High	Not Found	Not Found	Not Found		0	0.701	10.84	3
High	Master Protein	G7ISK3	ATP synthase protein OS=Medicago truncatula GN=MTR_2g020310 PE=4 SV=1	0	43.517	20.082	6	53	2	1	244	27	5.81	High	High	High	High	Not Found	Not Found	Not Found	Not Found		0	6.017	165.44	6
High	Master Protein	A0A072UWP5	Calmodulin-domain kinase CDPK protein OS=Medicago truncatula GN=MTR_3g051770 PE=4 SV=1	0	63.88	20.0743	10	21	9	1	538	60.6	6.13	High	High	High	High	High	High	High	Not Found		0	1.154	80.21	10
High	Master Protein	G7IET7	Zinc finger protein, putative OS=Medicago truncatula GN=MTR_1g106530 PE=4 SV=1	0	26.688	20.059	5	9	5	1	339	37.2	8.22	High	High	Not Found	Medium	High	High	High	High		0	0.995	29.42	5
High	Master Protein	G7IYL0	LRR receptor-like kinase OS=Medicago truncatula GN=MTR_3g009050 PE=4 SV=1	0	36.373	20.0418	8	19	8	1	479	52.9	8.62	High	High	High	High	High	High	Not Found	Not Found		0	0.778	66.64	8
High	Master Protein	G7IEH2	Legumin storage protein OS=Medicago truncatula GN=MTR_1g072630 PE=3 SV=1	0	60.529	20.0351	9	22	3	1	569	65.3	6.58	Not Found	High	High	Not Found	High	Not Found	Not Found	Not Found		0	1.395	88.88	9
High	Master Protein	G7L2K4	Transmembrane protein, putative OS=Medicago truncatula GN=MTR_7g076630 PE=2 SV=1	0	6.318	20	1	1	1	1	90	10	9.61	Not Found	Not Found	Not Found	Not Found	Not Found	Not Found	High	Not Found		0	0.585	6.16	1
High	Master Protein	G7JAD8	DNA-binding protein alba protein OS=Medicago truncatula GN=MTR_3g095240 PE=4 SV=1	0	19.459	20	6	17	2	1	245	27.1	10.05	Not Found	Not Found	High	High	Not Found	Not Found	High	Not Found		0	2.981	50.74	6
High	Master Protein	B7FL93	2-methoxy-6-polyprenyl-1,4-benzoquinol methylase, mitochondrial OS=Medicago truncatula GN=COQ5 PE=2 SV=1	0	21.042	20	4	4	4	1	290	32.3	7.06	Not Found	High	Not Found	High	Not Found	High	Not Found	Not Found		0	0.551	18.66	4
High	Master Protein	B7FH51	60S ribosomal protein L27 OS=Medicago truncatula GN=MTR_2g006170 PE=2 SV=1	0	9.353	20	2	2	2	1	135	15.6	10.33	Not Found	Not Found	High	High	Not Found	Not Found	Not Found	Not Found		0	0.931	8.92	2
High	Master Protein	G7IHL3	ATP synthase 6 kDa subunit OS=Medicago truncatula GN=MTR_2g096370 PE=4 SV=1	0.001	3.229	20	1	1	1	1	55	6.5	10.27	Not Found	Not Found	Not Found	Not Found	Not Found	High	Not Found	Not Found		0	0.778	3.17	1
High	Master Protein	G7J4Y0	Aldehyde dehydrogenase OS=Medicago truncatula GN=MTR_3g088150 PE=3 SV=2	0	35.18	20	8	17	8	1	490	53.4	7.15	High	High	High	High	High	High	High	Not Found		0	1.346	66.44	8
High	Master Protein	B7FGP5	Adenine nucleotide alpha hydrolase superfamily protein OS=Medicago truncatula GN=MTR_4g019800 PE=2 SV=1	0	5.401	20	3	3	3	1	165	18.4	6.05	Medium	Not Found	Not Found	Not Found	High	High	Not Found	Not Found		0	0.638	9.49	3
High	Master Protein	A0A072VR15	Dihydrolipoamide acetyltransferase component of pyruvate dehydrogenase complex OS=Medicago truncatula GN=MTR_1g111140 PE=3 SV=1	0	36.957	20	7	13	6	1	470	49.3	8.95	Not Found	High	High	High	High	Not Found	Not Found	Not Found		0	0.931	46	7
High	Master Protein	G7K259	Clathrin heavy chain OS=Medicago truncatula GN=MTR_5g082900 PE=3 SV=1	0	173.426	19.9883	29	59	10	1	1706	193.2	5.44	Medium	Not Found	High	High	High	High	High	Not Found		0	1.265	250.25	29
High	Master Protein	A0A072VNG3	Protoporphyrinogen IX oxidase OS=Medicago truncatula GN=MTR_1g085730 PE=4 SV=1	0	72.239	19.9637	10	21	10	1	551	59.4	9.13	High	High	Not Found	High	High	High	High	Not Found		0	2.047	90.88	10
High	Master Protein	B7FJJ4	Pyruvate dehydrogenase E1 beta subunit OS=Medicago truncatula GN=MTR_7g005380 PE=2 SV=1	0	26.736	19.9446	7	9	7	1	361	38.9	6.11	High	Not Found	High	High	High	High	High	Not Found		0	1.239	25.57	7
High	Master Protein	G7IUC7	Outer membrane OMP85 family protein OS=Medicago truncatula GN=MTR_2g098110 PE=4 SV=1	0	44.552	19.9405	11	16	11	1	672	73	8.56	High	High	High	High	High	High	High	Not Found		0	0.778	59.92	11
High	Master Protein	G7JTB1	Monoglyceride lipase-like protein OS=Medicago truncatula GN=MTR_4g127220 PE=4 SV=1	0	27.851	19.9387	6	10	6	1	326	36.8	6.8	High	Not Found	Not Found	High	High	High	Medium	Not Found		0	1.581	35.56	6
High	Master Protein	C9WEK1	Cation efflux protein/zinc transporter OS=Medicago truncatula GN=MTP1 PE=2 SV=1	0	36.727	19.9017	7	15	7	1	407	45	6.37	High	High	High	High	High	High	High	Not Found		0	1.154	59.32	7
High	Master Protein	A2Q3Y9	50S ribosomal protein L18 OS=Medicago truncatula GN=MTR_2g044920 PE=2 SV=1	0	11.493	19.8795	3	6	3	1	166	18.3	9.86	High	Medium	High	High	High	Not Found	Not Found	Not Found		0	1.154	22.2	3
High	Master Protein	A0A072U2W1	Triosephosphate isomerase OS=Medicago truncatula GN=MTR_7g103020 PE=3 SV=1	0	32.821	19.8718	4	9	3	1	312	33.4	7.02	High	High	High	High	Not Found	Not Found	Not Found	Not Found		0	0.995	47.06	4
High	Master Protein	A0A072TT49	Polysaccharide biosynthesis protein OS=Medicago truncatula GN=MTR_8g080660 PE=4 SV=1	0	34.289	19.8653	8	15	8	1	297	33.7	7.52	High	High	High	High	High	High	High	Not Found		0	2.594	42.5	8
High	Master Protein	G7I6U3	FTSH extracellular protease family protein OS=Medicago truncatula GN=MTR_1g080430 PE=4 SV=2	0	116.581	19.8517	25	64	25	1	1214	139.8	6.61	High	High	High	High	High	High	High	Not Found		0	1.659	217.44	25
High	Master Protein	A0A072VBT8	Electron transfer flavoprotein-ubiquinone oxidoreductase, mitochondrial OS=Medicago truncatula GN=MTR_2g099040 PE=3 SV=1	0	31.172	19.8454	6	10	1	1	388	43.4	8.03	Not Found	Not Found	Not Found	Not Found	Not Found	High	High	Not Found		0	1.015	39.45	6
High	Master Protein	A0A072VBF4	Magnesium transporter MRS2-like protein OS=Medicago truncatula GN=MTR_2g084565 PE=4 SV=1	0	56.443	19.8198	10	23	10	1	444	49.9	5.9	High	High	High	High	High	High	High	High		0	1.593	83.38	10
High	Master Protein	G7KGX1	60S acidic ribosomal protein P0 OS=Medicago truncatula GN=MTR_5g082180 PE=3 SV=1	0	19.463	19.8142	5	6	1	1	323	34	5.21	Not Found	Not Found	Not Found	High	Not Found	Not Found	Not Found	Not Found		0	0.968	22.83	5
High	Master Protein	G7KQB6	Dihydroorotate dehydrogenase family protein OS=Medicago truncatula GN=MTR_6g071210 PE=4 SV=1	0	30.428	19.8113	9	15	8	1	424	46.5	7.43	Not Found	High	High	High	High	Not Found	Not Found	Not Found		0	1.154	48.71	9
High	Master Protein	A0A072UNI9	White-brown-complex ABC transporter family protein OS=Medicago truncatula GN=MTR_4g076940 PE=4 SV=1	0	63.318	19.7817	14	31	14	1	733	82	8.9	High	High	High	High	High	High	Not Found	Not Found	Deamidated [R92; R105]	0	1.462	101.85	14
High	Master Protein	G7L2X1	Peptidyl-prolyl cis-trans isomerase OS=Medicago truncatula GN=MTR_7g116340 PE=3 SV=1	0	5.886	19.7674	4	5	3	1	172	18.6	8.54	High	Not Found	Not Found	Not Found	Not Found	High	High	Not Found	Deamidated [Q127]	0	0.719	11.86	4
High	Master Protein	G7LEJ1	DnaJ heat shock amino-terminal domain protein OS=Medicago truncatula GN=MTR_8g037810 PE=4 SV=1	0	22.693	19.764	5	6	5	1	339	38.1	6.15	High	Not Found	High	High	Not Found	High	Not Found	Not Found		0	0.65	24.26	5
High	Master Protein	A2Q5B6	Aldo/keto reductase OS=Medicago truncatula GN=MTR_7g021850 PE=4 SV=1	0	26.049	19.764	5	10	5	1	339	37.6	5.86	High	High	High	High	High	High	High	Not Found		0	0.65	40.93	5
High	Master Protein	G7IHV2	PfkB family carbohydrate kinase OS=Medicago truncatula GN=MTR_2g098950 PE=3 SV=1	0	25.248	19.7568	5	11	2	1	329	35.2	5.35	High	Not Found	Not Found	Not Found	Not Found	High	Not Found	Not Found		0	0.616	39	5
High	Master Protein	A0A072UDI9	UvrB/uvrC domain protein OS=Medicago truncatula GN=MTR_5g043480 PE=4 SV=1	0	16.293	19.7531	4	4	4	1	243	27.6	5.57	Not Found	Not Found	Not Found	Not Found	High	High	High	Not Found		0	0.719	13.8	4
High	Master Protein	G7J2L0	60 kDa inner membrane protein OS=Medicago truncatula GN=MTR_3g086250 PE=3 SV=1	0	82.449	19.7368	8	43	8	1	532	58.5	8.27	High	High	High	High	High	High	High	High	Deamidated [Q436; Q443]	0	2.3	229.69	8
High	Master Protein	G7KCW0	Dihydropyrimidinase OS=Medicago truncatula GN=MTR_5g089200 PE=4 SV=1	0	65.808	19.6629	8	18	7	1	534	58.4	6.21	High	High	High	High	High	High	High	Not Found		0	1.395	79.83	8
High	Master Protein	G7JM35	Peptidylprolyl isomerase OS=Medicago truncatula GN=MTR_4g055500 PE=4 SV=2	0	49.734	19.6486	9	11	9	1	626	70.7	5.52	Not Found	Not Found	High	High	Not Found	High	High	High		0	0.896	43.69	9
High	Master Protein	G7K0X3	Ribosomal protein S14p/S29e OS=Medicago truncatula GN=MTR_1g106755 PE=2 SV=1	0.001	2.936	19.6429	1	2	1	1	56	6.4	9.69	Not Found	Not Found	Not Found	High	High	Not Found	Not Found	Not Found		0	0.585	6.19	1
High	Master Protein	G7ILR4	Ubiquitin-specific protease family C19 protein OS=Medicago truncatula GN=MTR_2g025190 PE=4 SV=1	0	24.896	19.6262	5	7	5	1	428	46	9.58	High	High	High	Not Found	High	High	Not Found	Not Found		0	0.509	30.49	5
High	Master Protein	B7FI43	Caleosin OS=Medicago truncatula GN=MTR_1g032160 PE=2 SV=1	0	10.74	19.6172	3	8	3	1	209	23.5	8.68	High	High	High	High	High	Not Found	Not Found	Not Found		0	1.154	34.78	3
High	Master Protein	A0A072UDZ9	Pleckstrin-like (PH) and lipid-binding START domain protein OS=Medicago truncatula GN=MTR_5g027200 PE=4 SV=1	0	60.328	19.5862	10	14	10	1	725	82.9	6.58	Not Found	Not Found	High	High	High	High	Not Found	Not Found	Phospho [S450]	1	0.66	57.33	10
High	Master Protein	A8TVQ0	Beta-glucosidase G1 OS=Medicago truncatula GN=MTR_4g015460 PE=2 SV=1	0	40.981	19.5652	8	19	7	1	506	57.6	6.37	High	High	High	High	High	High	High	Not Found		0	0.951	71.62	8
High	Master Protein	G7IHD6	Oxygen-evolving enhancer protein OS=Medicago truncatula GN=MTR_2g082580 PE=4 SV=1	0	17.717	19.5652	5	21	5	1	230	25.9	9.33	High	High	High	High	High	High	Not Found	Not Found		0	1.154	56.38	5
High	Master Protein	G7IP43	Early-responsive to dehydration stress protein (ERD4) OS=Medicago truncatula GN=MTR_2g018780 PE=4 SV=1	0	59.781	19.5291	14	28	14	1	722	81.6	9.17	High	High	High	High	High	High	High	High	Phospho [S713]	1	1.512	91.06	14
High	Master Protein	G7L8W8	Signal peptidase I family protein OS=Medicago truncatula GN=MTR_8g103470 PE=2 SV=1	0	49.812	19.5205	6	15	6	1	292	32.5	9.17	High	High	High	High	High	High	Not Found	Not Found		0	1.228	69.67	6
High	Master Protein	A0A072TT57	Nuclear transport factor 2 OS=Medicago truncatula GN=MTR_8g080790 PE=4 SV=1	0	8.81	19.5122	2	2	2	1	123	13.6	6.34	Not Found	Not Found	Not Found	High	Not Found	Not Found	Not Found	Not Found		0	0.778	7.66	2
High	Master Protein	G7JXH2	FAD/NAD(P)-binding oxidoreductase family protein OS=Medicago truncatula GN=MTR_5g013250 PE=4 SV=1	0	28.731	19.4896	6	7	5	1	431	47.4	8.32	High	Not Found	Not Found	High	High	High	High	Not Found		0	0.562	24.97	6
High	Master Protein	G7JPK0	Peptidyl-tRNA hydrolase II (PTH2) family protein OS=Medicago truncatula GN=MTR_4g075280 PE=4 SV=1	0	25.328	19.4737	4	14	4	1	190	21.2	9.45	High	High	High	High	High	Medium	Not Found	Not Found		0	2.981	50.99	4
High	Master Protein	G7JHK7	Pyruvate kinase OS=Medicago truncatula GN=MTR_4g083330 PE=3 SV=1	0	47.87	19.4503	7	13	5	1	473	51	7.64	Not Found	Not Found	High	High	High	Not Found	Not Found	Not Found		0	0.778	57.07	7
High	Master Protein	G7KPU0	Elongation factor Ts, mitochondrial OS=Medicago truncatula GN=EFTS PE=3 SV=1	0	84.063	19.4497	16	22	16	1	1054	114.5	4.84	High	High	High	High	High	High	High	High		0	1.184	84.2	16
High	Master Protein	A0A072UCZ4	O-acyltransferase (WSD1-like) family protein OS=Medicago truncatula GN=MTR_5g004770 PE=4 SV=1	0	23.744	19.4444	8	16	8	1	396	44.5	7.15	High	High	High	High	High	High	High	Not Found		0	0.812	47.38	8
High	Master Protein	Q2HW22	Cupin, RmlC-type OS=Medicago truncatula GN=MTR_7g079730 PE=4 SV=1	0	46.503	19.3966	8	14	2	1	464	53.1	5.53	Not Found	Not Found	Medium	Not Found	High	Not Found	Not Found	Not Found		0	1.043	64.34	8
High	Master Protein	A0A072UGG8	Heat shock 70 kDa protein OS=Medicago truncatula GN=MTR_4g012050 PE=3 SV=1	0	68.457	19.389	13	21	11	1	851	93.7	5.25	High	High	High	High	High	High	High	Not Found		0	0.882	87.65	13
High	Master Protein	A2Q5A5	NADH-quinone oxidoreductase subunit B OS=Medicago truncatula GN=ndhK PE=3 SV=1	0	6.903	19.3833	3	4	3	1	227	25.7	8.73	Not Found	Not Found	High	High	High	Not Found	Not Found	Not Found		0	0.638	11.54	3
High	Master Protein	I3T8Q5	General regulatory factor 2 OS=Medicago truncatula GN=MTR_2g015980 PE=2 SV=1	0	15.069	19.3798	5	16	1	1	258	29.1	4.81	Not Found	Not Found	Not Found	Not Found	High	High	Not Found	Not Found		0	0.896	41.53	5
High	Master Protein	Q2HTY1	FAD-dependent pyridine nucleotide-disulphide oxidoreductase; Calcium-binding EF-hand OS=Medicago truncatula GN=MTR_4g091240 PE=4 SV=1	0	54.789	19.3772	16	38	13	1	578	65.4	8.02	High	High	High	High	High	High	High	Not Found	Carboxymethyl [K309]	0	1.707	131.97	16
High	Master Protein	G7J506	Delta-aminolevulinic acid dehydratase OS=Medicago truncatula GN=MTR_3g088610 PE=3 SV=1	0	30.466	19.3705	5	7	5	1	413	45.3	6.28	High	High	High	High	High	High	Not Found	Not Found		0	0.585	32.64	5
High	Master Protein	G7IF99	Cytochrome P450 family 87 protein OS=Medicago truncatula GN=MTR_2g010250 PE=3 SV=1	0	45.734	19.3676	10	18	8	1	506	58.5	8.07	High	High	Not Found	High	High	High	High	Not Found		0	1.102	62.94	10
High	Master Protein	G7J9I2	Aldo/keto reductase family oxidoreductase OS=Medicago truncatula GN=MTR_3g083130 PE=4 SV=1	0	29.287	19.3651	5	8	5	1	315	35.1	5.96	Not Found	High	High	High	Medium	High	Not Found	Not Found	Phospho [T6]	1	0.688	38.93	5
High	Master Protein	G7LBH7	Small nuclear ribonucleoprotein OS=Medicago truncatula GN=MTR_8g105890 PE=4 SV=2	0	4.801	19.3548	2	3	2	1	124	14.4	9.76	Not Found	Not Found	Not Found	Not Found	High	High	Not Found	Not Found		0	0.931	9.8	2
High	Master Protein	A0A072VB05	MORN domain protein OS=Medicago truncatula GN=MTR_2g084835 PE=4 SV=1	0	107.201	19.3357	14	33	14	1	843	97.2	4.98	High	High	High	High	High	High	High	High	Deamidated [R306]	0	2.162	152.08	14
High	Master Protein	G7JYQ0	RAB GTPase-like protein B1C OS=Medicago truncatula GN=MTR_5g013900 PE=4 SV=2	0	28.151	19.3237	4	8	1	1	207	23	7.9	Not Found	Not Found	Not Found	Not Found	Not Found	Not Found	High	Not Found		0	0.896	36.14	4
High	Master Protein	G7JQS3	Secretory carrier-associated membrane protein OS=Medicago truncatula GN=MTR_4g090510 PE=3 SV=2	0	22.204	19.2926	3	7	2	1	311	34.9	8.19	Not Found	High	High	High	High	High	Not Found	Not Found		0	0.874	32.57	3
High	Master Protein	G7K0X0	Vacuolar-sorting receptor-like protein OS=Medicago truncatula GN=MTR_5g005100 PE=4 SV=1	0	37.481	19.2926	10	18	7	1	622	68.7	6.05	High	High	High	High	High	High	Not Found	Not Found		0	0.855	57.83	10
High	Master Protein	B7FKW5	NB-ARC domain disease resistance protein OS=Medicago truncatula GN=MTR_8g087570 PE=2 SV=1	0	5.483	19.2913	4	6	2	1	254	28.8	9.26	Not Found	High	High	Medium	Not Found	Not Found	Not Found	Not Found		0	0.624	17.25	4
High	Master Protein	G7LFP6	CBS/octicosapeptide/phox/Bemp1 (PB1) domain protein OS=Medicago truncatula GN=MTR_8g094780 PE=4 SV=1	0	65.517	19.2884	10	22	5	1	534	57.6	7.34	High	High	High	High	High	High	High	Not Found		0	1.712	92.14	10
High	Master Protein	G7LDE7	GroES chaperonin OS=Medicago truncatula GN=MTR_8g009280 PE=2 SV=1	0	16.763	19.2593	2	3	2	1	135	14.8	9	Not Found	High	Not Found	Not Found	High	Not Found	Not Found	Not Found		0	1.154	12.17	2
High	Master Protein	A0A072U0I0	Calmodulin-domain kinase CDPK protein OS=Medicago truncatula GN=MTR_7g068710 PE=4 SV=1	0	42.798	19.2453	10	18	7	1	530	59.9	6.46	Not Found	High	Not Found	High	High	High	High	Not Found		0	1.069	57.95	10
High	Master Protein	G7JXQ3	Threonine endopeptidase OS=Medicago truncatula GN=MTR_5g032440 PE=2 SV=1	0	7.557	19.2308	3	3	3	1	182	20.1	5.59	Not Found	Not Found	Not Found	Not Found	Not Found	Not Found	High	High		0	0.874	11.49	3
High	Master Protein	G7J865	p-loop nucleoside triphosphate hydrolase superfamily protein OS=Medicago truncatula GN=MTR_3g092070 PE=3 SV=1	0	26.832	19.2208	7	10	4	1	385	42.7	6.35	Not Found	High	High	High	Not Found	Medium	Not Found	Not Found		0	1.089	31.22	7
High	Master Protein	I3S3K3	Peptidyl-prolyl cis-trans isomerase OS=Medicago truncatula GN=MTR_3g463900 PE=2 SV=1	0	4.665	19.2118	4	9	3	1	203	21.8	9.03	High	Not Found	Not Found	High	High	High	Not Found	Not Found		0	1.054	20.8	4
High	Master Protein	A2Q2S7	General substrate transporter OS=Medicago truncatula GN=MTR_7g005910 PE=3 SV=1	0	44.125	19.2	8	19	5	1	500	54.2	6.04	Not Found	High	High	High	Not Found	High	High	Not Found		0	1.555	59.13	8
High	Master Protein	G7KH99	1-aminocyclopropane-1-carboxylate oxidase OS=Medicago truncatula GN=MTR_5g085330 PE=3 SV=1	0	24.881	19.1824	6	8	4	1	318	36.5	6.2	Not Found	Not Found	Medium	High	High	Not Found	High	Not Found		0	0.931	34.02	6
Medium	Master Protein	G7JAQ0	UBL5 ubiquitin-like modifier OS=Medicago truncatula GN=MTR_3g084140 PE=2 SV=1	0.029	1.201	19.1781	1	2	1	1	73	8.4	8.13	Not Found	Not Found	Not Found	High	Not Found	Not Found	Not Found	Not Found	Phospho [T35; T37]	2	0.468	2.57	1
High	Master Protein	G7LHY5	Serine/threonine-protein phosphatase OS=Medicago truncatula GN=MTR_8g085610 PE=3 SV=1	0	14.846	19.1558	4	4	2	1	308	35.3	5.41	Not Found	Not Found	High	Not Found	Not Found	High	Not Found	Not Found		0	0.52	13.86	4
High	Master Protein	G7JXX6	LRR receptor-like kinase OS=Medicago truncatula GN=MTR_5g043800 PE=4 SV=1	0	18.474	19.1489	5	8	5	1	329	37.1	8.15	High	High	Not Found	High	Medium	Medium	Not Found	Not Found		0	0.778	26.73	5
High	Master Protein	G7J059	Glucuronoxylan 4-O-methyltransferase OS=Medicago truncatula GN=MTR_3g005710 PE=2 SV=1	0	21.517	19.1275	5	6	5	1	298	33.7	7.4	Not Found	High	High	High	High	Not Found	High	Not Found		0	0.65	20.06	5
High	Master Protein	G7L831	TCP-1/cpn60 chaperonin family protein OS=Medicago truncatula GN=MTR_8g088270 PE=3 SV=1	0	55.524	19.1176	9	17	9	1	544	58.8	6.16	Not Found	High	High	High	High	High	Not Found	Not Found		0	0.968	79.39	9
High	Master Protein	G7L2M8	GrpE protein homolog OS=Medicago truncatula GN=MTR_7g087250 PE=3 SV=1	0	37.461	19.1045	6	13	6	1	335	36.8	4.67	Not Found	High	High	High	High	High	High	Not Found		0	1.448	54.8	6
High	Master Protein	G7JX25	Uncharacterized protein OS=Medicago truncatula GN=MTR_5g053260 PE=2 SV=1	0	44.175	19.0826	12	21	12	1	545	61.6	5.4	High	Not Found	Not Found	High	High	High	High	Not Found		0	2.039	67.39	12
High	Master Protein	G7IL22	30S ribosomal protein S1 OS=Medicago truncatula GN=MTR_2g033020 PE=4 SV=2	0	25.144	19.0709	7	9	7	1	409	44.9	5.24	Not Found	High	Medium	High	High	Not Found	High	Not Found		0	0.859	28.19	7
High	Master Protein	G7LD87	Plastid movement impaired protein OS=Medicago truncatula GN=MTR_8g106680 PE=4 SV=2	0	82.009	19.0586	12	14	12	1	871	96.3	5.44	Not Found	Not Found	Not Found	High	High	High	High	Not Found	Phospho [S460]	1	0.707	65.45	12
High	Master Protein	G7KEW5	p-loop nucleoside triphosphate hydrolase superfamily protein OS=Medicago truncatula GN=MTR_5g020530 PE=3 SV=1	0	67.001	19.0476	13	20	11	1	630	70.5	9.14	High	High	High	High	High	High	High	High		0	1.081	76.34	13
High	Master Protein	B7FJ81	Copper chaperone OS=Medicago truncatula GN=MTR_7g013660 PE=2 SV=1	0	7.067	19.0476	2	4	2	1	126	13.6	4.55	Not Found	Not Found	High	High	High	Not Found	Medium	Not Found		0	2.162	16.81	2
High	Master Protein	A0A072TVN2	Dynamin-like protein 1E OS=Medicago truncatula GN=MTR_8g099550 PE=3 SV=1	0	39.02	19.0164	12	20	11	1	610	68.2	8.03	High	High	High	High	High	High	High	Not Found		0	1.006	62.35	12
High	Master Protein	G7K9E3	Methylesterase OS=Medicago truncatula GN=MTR_5g018300 PE=2 SV=1	0	12.074	19.0114	5	9	1	1	263	29.6	5.9	Not Found	Not Found	Not Found	Not Found	Not Found	Not Found	High	High		0	0.995	23.97	5
High	Master Protein	A0A072TWL1	Importin subunit beta-like protein OS=Medicago truncatula GN=MTR_8g099785 PE=4 SV=1	0	83.846	19.0092	15	28	11	1	868	96.2	4.75	High	High	Medium	High	High	High	High	Not Found		0	1.064	100.32	15
High	Master Protein	A0A072VN55	Viral A-type inclusion protein, putative OS=Medicago truncatula GN=MTR_1g082215 PE=4 SV=1	0	41.397	18.9873	11	12	11	1	632	72.6	5.25	Not Found	High	High	High	High	Not Found	High	High		0	0.778	38.47	11
High	Master Protein	G7IDL5	Acetyl-CoA carboxylase, putative OS=Medicago truncatula GN=MTR_1g071610 PE=4 SV=1	0	55.637	18.9771	9	12	8	1	743	81.8	6.84	High	High	High	High	High	High	Medium	Not Found		0	0.54	56.03	9
High	Master Protein	A0A072UQ88	K-like selenoprotein OS=Medicago truncatula GN=MTR_5g059100 PE=4 SV=1	0	12.94	18.9655	1	2	1	1	116	12	10.08	Not Found	Not Found	Not Found	High	High	Not Found	Not Found	Not Found		0	0.468	13.04	1
High	Master Protein	I3SYR8	Adenine nucleotide alpha hydrolase superfamily protein OS=Medicago truncatula GN=MTR_4g064933 PE=2 SV=1	0	12.134	18.9024	2	2	2	1	164	17.8	6.95	Not Found	High	Not Found	Not Found	High	Not Found	Not Found	Not Found		0	0.468	8.86	2
High	Master Protein	A0A072TMQ2	DUF2358 family protein OS=Medicago truncatula GN=MTR_8g028425 PE=4 SV=1	0	14.369	18.8976	4	5	4	1	254	29.7	9.17	Not Found	Not Found	Not Found	High	High	High	High	Not Found		0	0.778	17.32	4
High	Master Protein	G7K7B5	PLAC8 family protein OS=Medicago truncatula GN=MTR_5g083740 PE=4 SV=1	0	40.781	18.8948	10	18	10	1	561	63.3	8.54	High	High	High	High	High	High	Not Found	Not Found	Phospho [S483]	1	1.477	59.28	10
High	Master Protein	A0A072U605	Kinesin light chain OS=Medicago truncatula GN=MTR_8g099745 PE=4 SV=1	0	56.237	18.8776	9	17	9	1	588	64.5	5.47	High	High	High	High	High	High	High	Not Found		0	0.778	77.11	9
High	Master Protein	A0A072UIJ9	Phosphate carrier protein OS=Medicago truncatula GN=MTR_6g033280 PE=3 SV=1	0	21.746	18.8732	5	13	3	1	355	38.1	9.1	High	High	High	Medium	Not Found	Medium	Not Found	Not Found		0	0.65	38.85	5
High	Master Protein	G7ZYS9	F1F0-ATPase inhibitor protein OS=Medicago truncatula GN=MTR_1g111840 PE=2 SV=1	0	14.704	18.8235	1	2	1	1	85	9.5	9.79	Not Found	Not Found	Not Found	Not Found	Not Found	Not Found	High	Not Found		0	2.162	10.44	1
High	Master Protein	I3SR73	Asterix-like protein OS=Medicago truncatula GN=MTR_3g024170 PE=2 SV=1	0	4.142	18.8119	2	3	2	1	101	11.1	9.25	Not Found	High	High	Not Found	Not Found	Not Found	Not Found	Medium		0	1.512	9.27	2
High	Master Protein	G7K595	Proteasome subunit alpha type OS=Medicago truncatula GN=MTR_5g016590 PE=3 SV=1	0	18.807	18.8	4	4	3	1	250	27.3	7.09	Not Found	Not Found	High	Not Found	Not Found	Not Found	High	Not Found		0	0.719	13.64	4
High	Master Protein	G7LD00	Transmembrane protein, putative OS=Medicago truncatula GN=MTR_8g076220 PE=4 SV=1	0	40.377	18.7943	6	29	6	1	282	31.8	10.17	High	High	High	High	High	High	High	Not Found		0	1.976	102.62	6
High	Master Protein	A0A072V8S6	GPI-anchor transamidase-like protein OS=Medicago truncatula GN=MTR_2g058550 PE=4 SV=1	0	37.466	18.7654	6	11	6	1	405	46.4	6.52	Not Found	Not Found	High	High	High	High	High	Not Found		0	1.424	39.49	6
High	Master Protein	I3S1M4	SLL1 protein OS=Medicago truncatula GN=MTR_1g048960 PE=2 SV=1	0	4.495	18.75	2	12	2	1	96	10.3	9.94	High	Medium	Not Found	Medium	High	High	High	High		0	5.31	32.97	2
High	Master Protein	G7L6L4	Brassinosteroid insensitive 1-associated receptor kinase OS=Medicago truncatula GN=MTR_7g078730 PE=3 SV=1	0	36.65	18.7373	9	15	6	1	491	54.3	7.31	High	High	Not Found	High	High	High	Not Found	Not Found		0	1.207	50.73	9
High	Master Protein	A0A072TX52	1-deoxy-D-xylulose 5-phosphate reductoisomerase OS=Medicago truncatula GN=MTR_8g012565 PE=3 SV=1	0	37.52	18.7234	7	11	7	1	470	51.1	6.76	High	High	High	Not Found	High	Not Found	Not Found	Not Found		0	1.371	42.78	7
Low	Master Protein	G7LDP6	Uncharacterized protein OS=Medicago truncatula GN=MTR_8g060960 PE=4 SV=1	0.154	0.454	18.6992	1	1	1	1	123	13.9	10.55	Not Found	Not Found	Not Found	Not Found	Medium	Not Found	Not Found	Not Found		0	0.468	3.95	1
High	Master Protein	B7FMD3	Proteasome subunit alpha type OS=Medicago truncatula GN=MTR_8g464460 PE=2 SV=1	0	8.512	18.6992	5	5	1	1	246	27.3	6.23	Not Found	Not Found	Not Found	Not Found	Medium	Not Found	Not Found	Not Found	Deamidated [Q173]	0	0.585	11.2	5
High	Master Protein	Q2HW07	Photosystem I reaction center subunit XI OS=Medicago truncatula GN=MTR_7g079900 PE=2 SV=1	0	38.324	18.6916	4	12	4	1	214	22.9	9.41	High	High	High	High	High	Not Found	Not Found	Not Found		0	2.981	49.26	4
High	Master Protein	Q946J9	Aquaporin protein PIP1;1 OS=Medicago truncatula GN=PIP1;1 PE=2 SV=1	0	38.239	18.6851	5	15	3	1	289	30.9	8.41	High	Not Found	High	High	Not Found	High	High	Not Found	Deamidated [Q6]; Phospho [S9]	1	4.623	53.94	5
High	Master Protein	G7KB73	Annexin OS=Medicago truncatula GN=MTR_5g063670 PE=2 SV=1	0	12.901	18.6709	5	9	5	1	316	36.1	7.61	High	High	High	High	High	Not Found	High	Not Found		0	0.688	24.36	5
High	Master Protein	G7KUR3	Sphingosine-1-phosphate lyase OS=Medicago truncatula GN=MTR_7g022310 PE=3 SV=1	0	54.357	18.6691	9	20	9	1	541	59.3	8.12	High	High	High	High	High	High	High	High		0	1.202	70.41	9
High	Master Protein	A0A072UUF6	CXE carboxylesterase OS=Medicago truncatula GN=MTR_3g012440 PE=4 SV=1	0	17.129	18.6589	6	6	6	1	343	38.4	5.92	High	Not Found	High	High	High	High	High	Not Found		0	0.738	17.86	6
High	Master Protein	A0A072TM21	Vacuolar protein sorting-associated protein 26A OS=Medicago truncatula GN=MTR_8g015430 PE=4 SV=1	0	19.186	18.6047	4	6	4	1	301	35.2	7.55	High	High	High	Not Found	Medium	Not Found	High	Not Found		0	0.624	22.42	4
High	Master Protein	G7JSR5	p-loop nucleoside triphosphate hydrolase superfamily protein OS=Medicago truncatula GN=MTR_4g077880 PE=4 SV=1	0	47.603	18.5971	12	21	11	1	613	67.9	9.1	Not Found	High	High	High	High	High	High	Not Found	Deamidated [R336]	0	0.917	68.31	12
High	Master Protein	B7FGK4	Plastocyanin-like domain protein OS=Medicago truncatula GN=MTR_8g007035 PE=2 SV=1	0	32.527	18.593	3	22	3	1	199	20.6	7.24	High	High	High	High	High	High	High	Not Found		0	2.594	103.58	3
High	Master Protein	G7IJU3	Peroxidase OS=Medicago truncatula GN=MTR_2g029830 PE=3 SV=2	0	37.25	18.5915	8	13	3	1	355	37.9	6.52	Not Found	High	High	High	Not Found	Not Found	Not Found	Not Found		0	1.783	45.23	8
High	Master Protein	A2Q5B8	Eukaryotic translation initiation factor 3 subunit H OS=Medicago truncatula GN=MTR_7g021870 PE=3 SV=1	0	18.732	18.5841	4	5	4	1	339	38.8	4.81	Not Found	Not Found	Not Found	High	High	High	High	Not Found		0	0.52	22.91	4
High	Master Protein	G7JCU3	Peroxidase OS=Medicago truncatula GN=MTR_4g095450 PE=3 SV=1	0	25.273	18.5759	5	11	5	1	323	35.4	8.92	High	High	High	High	High	High	Not Found	Not Found		0	0.833	35.56	5
High	Master Protein	G7LF65	Peptidylprolyl isomerase OS=Medicago truncatula GN=MTR_8g012380 PE=2 SV=1	0	8.945	18.543	2	2	2	1	151	16.5	7.94	Not Found	Not Found	Not Found	High	High	Not Found	Not Found	Not Found		0	0.778	7.58	2
High	Master Protein	G7I5B0	30S ribosomal protein S9P OS=Medicago truncatula GN=MTR_1g021760 PE=2 SV=1	0	16.778	18.5366	3	6	3	1	205	22.2	10.58	High	High	High	High	Not Found	Not Found	Not Found	Not Found		0	0.778	19.92	3
High	Master Protein	G7IDD7	Mediator of RNA polymerase II transcription subunit 36a OS=Medicago truncatula GN=MTR_1g114000 PE=2 SV=1	0	28.022	18.5304	7	13	7	1	313	32.9	10.07	High	High	High	High	High	High	High	Not Found		0	1.783	40.53	7
High	Master Protein	G7K5W0	Transporter family ABC domain protein OS=Medicago truncatula GN=MTR_5g075960 PE=4 SV=2	0	65.919	18.5237	11	18	7	1	718	78.7	9.33	High	Not Found	Not Found	High	High	High	High	Not Found		0	0.82	80.09	11
High	Master Protein	G7IFI1	LRR receptor-like kinase OS=Medicago truncatula GN=MTR_2g014960 PE=4 SV=1	0	83.913	18.5225	14	26	13	1	934	102.7	6	High	High	High	High	High	High	Medium	Not Found		0	1.089	108.59	14
High	Master Protein	A0A072VS77	Methylenetetrahydrofolate reductase OS=Medicago truncatula GN=MTR_1g040105 PE=3 SV=1	0	47.142	18.4874	11	17	11	1	595	66.9	6.02	High	High	High	High	High	High	High	Not Found		0	1.113	55.2	11
High	Master Protein	G7K371	Membrin OS=Medicago truncatula GN=MTR_5g090520 PE=3 SV=1	0	13.12	18.4685	3	3	3	1	222	25.5	9.48	Not Found	Not Found	High	Not Found	Not Found	Not Found	High	Not Found		0	0.874	12	3
High	Master Protein	A0A072U1P3	Strictosidine synthase family protein OS=Medicago truncatula GN=MTR_7g490350 PE=4 SV=1	0	27.128	18.4282	4	10	4	1	369	40.4	6.44	High	High	High	High	High	High	Not Found	Not Found		0	0.551	42.85	4
High	Master Protein	G7KF10	p-loop nucleoside triphosphate hydrolase superfamily protein OS=Medicago truncatula GN=MTR_5g020990 PE=3 SV=1	0	26.661	18.4265	8	8	8	1	483	55.5	7.15	Not Found	Not Found	High	High	High	High	High	Not Found		0	0.887	22.36	8
High	Master Protein	A0A072W040	NAD(P)-binding rossmann-fold protein OS=Medicago truncatula GN=MTR_1g100305 PE=3 SV=1	0	23.67	18.4127	5	7	5	1	315	34.3	9.45	High	High	Not Found	Not Found	High	High	Not Found	Not Found		0	1.069	29.65	5
High	Master Protein	B7FGX7	Transmembrane protein, putative OS=Medicago truncatula GN=MTR_5g007210 PE=2 SV=1	0	4.423	18.4049	2	2	2	1	163	18	10.17	Not Found	Not Found	Not Found	Not Found	Medium	High	Not Found	Not Found		0	0.468	6.75	2
High	Master Protein	G7JB01	40S ribosomal protein SA OS=Medicago truncatula GN=MTR_3g095810 PE=2 SV=1	0	19.485	18.3946	6	10	6	1	299	33.1	5.02	High	High	High	High	High	Not Found	Not Found	Not Found		0	1.154	28.61	6
High	Master Protein	G7IPS8	T-complex protein 1 subunit gamma OS=Medicago truncatula GN=MTR_2g013540 PE=3 SV=2	0	31.342	18.3784	9	12	9	1	555	60.4	6.27	Not Found	High	High	Medium	High	High	Medium	Not Found		0	0.701	36.25	9
High	Master Protein	G7K980	Terpene cyclase/mutase family member OS=Medicago truncatula GN=MTR_5g008810 PE=3 SV=1	0	55.006	18.362	12	22	12	1	757	86.4	6.58	High	High	High	High	High	High	High	Not Found		0	1.085	82.67	12
High	Master Protein	G7JGT0	NADP-dependent glyceraldehyde-3-phosphate dehydrogenase OS=Medicago truncatula GN=MTR_4g131180 PE=3 SV=1	0	34.807	18.3468	8	13	8	1	496	53	7.33	High	High	High	High	Not Found	High	Not Found	Not Found		0	0.951	47.24	8
High	Master Protein	G7JA94	Transmembrane protein, putative OS=Medicago truncatula GN=MTR_3g094780 PE=4 SV=1	0	31.716	18.2927	4	6	4	1	246	26.9	10.4	Not Found	Not Found	High	High	Not Found	Not Found	High	Not Found		0	2.162	31.36	4
High	Master Protein	G7I549	26S proteasome non-ATPase regulatory subunit-like protein OS=Medicago truncatula GN=MTR_1g009010 PE=4 SV=1	0	31.515	18.2898	8	9	6	1	421	46.9	6.48	Not Found	Not Found	High	Not Found	High	High	Not Found	Not Found		0	0.978	26.95	8
High	Master Protein	G7I9E0	Peptidylprolyl isomerase OS=Medicago truncatula GN=MTR_1g061850 PE=4 SV=2	0	13.82	18.2879	4	6	4	1	257	28	9.38	High	Not Found	High	High	High	High	Not Found	Not Found		0	0.719	15.74	4
High	Master Protein	A0A072V9D4	Zinc-binding dehydrogenase family oxidoreductase OS=Medicago truncatula GN=MTR_2g078520 PE=4 SV=1	0	16.806	18.2825	6	8	6	1	361	39.1	8.63	High	High	Not Found	High	High	High	Not Found	Not Found	Deamidated [Q218]	0	0.823	22.29	6
High	Master Protein	G7JCC0	Transmembrane protein, putative OS=Medicago truncatula GN=MTR_3g108690 PE=4 SV=1	0	29.632	18.2418	5	6	5	1	455	49.5	7.8	Not Found	High	Not Found	High	High	High	Not Found	Not Found		0	0.616	27.51	5
High	Master Protein	A0A072ULI6	UDP-D-apiose/UDP-D-xylose synthase OS=Medicago truncatula GN=MTR_4g056100 PE=4 SV=1	0	24.972	18.2051	6	8	6	1	390	43.8	6.04	Not Found	Not Found	High	High	High	High	High	Not Found		0	0.743	28.61	6
High	Master Protein	G7LHG7	Transmembrane protein, putative OS=Medicago truncatula GN=MTR_8g017190 PE=4 SV=1	0	4.622	18.1818	1	1	1	1	66	6.3	10.39	Not Found	Not Found	Not Found	Not Found	Not Found	High	Not Found	Not Found		0	0.468	3.8	1
High	Master Protein	G7KWK7	LITAF-like zinc ribbon domain protein OS=Medicago truncatula GN=MTR_7g005440 PE=2 SV=1	0	5.952	18.1818	2	2	2	1	132	14.7	6.86	Not Found	Not Found	Not Found	High	High	Not Found	Not Found	Not Found		0	0.52	6.64	2
High	Master Protein	G7IBR0	ABC transporter B family protein OS=Medicago truncatula GN=MTR_1g086080 PE=4 SV=1	0	92.367	18.1536	15	28	11	1	1289	139.2	7.77	High	High	High	High	High	High	High	Not Found	Deamidated [R1164]	0	0.567	123.96	15
High	Master Protein	B7FH42	Fission 1 protein OS=Medicago truncatula GN=MTR_5g090010 PE=2 SV=1	0	11.474	18.1287	3	3	3	1	171	18.5	6.2	High	Not Found	Not Found	Not Found	Not Found	Not Found	Not Found	High		0	0.701	10.33	3
High	Master Protein	G7KNI3	Cytosolic aldehyde dehydrogenase OS=Medicago truncatula GN=MTR_6g086300 PE=3 SV=1	0	29.992	18.1275	6	7	6	1	502	54.5	6.67	High	High	High	High	High	Not Found	High	Not Found		0	0.438	27.83	6
High	Master Protein	A0A072VF59	CDSP32 protein (Drought-induced stress protein of 32 kDa) OS=Medicago truncatula GN=MTR_1g026125 PE=4 SV=1	0	15.295	18.1208	5	8	5	1	298	33.7	6.68	High	High	Not Found	Not Found	High	High	High	Not Found		0	0.833	25.44	5
High	Master Protein	A0A072UVY6	Arsenical pump-driving ATPase-like protein OS=Medicago truncatula GN=MTR_4g058005 PE=4 SV=1	0	28.511	18.1102	4	7	3	1	381	41.6	8.29	Not Found	High	High	High	High	Not Found	Not Found	Not Found		0	0.65	32.61	4
High	Master Protein	A0A072U3I4	Fasciclin-like arabinogalactan protein 16 OS=Medicago truncatula GN=MTR_7g106760 PE=4 SV=1	0	18	18.0804	5	7	3	1	448	49.7	6.74	Not Found	Not Found	Medium	High	High	Not Found	Not Found	Not Found		0	0.585	22.21	5
High	Master Protein	A0A072V7U8	Transmembrane protein, putative OS=Medicago truncatula GN=MTR_2g450100 PE=4 SV=1	0	10.327	18.0791	4	6	4	1	177	19.9	6.73	Not Found	Not Found	High	High	High	Not Found	Not Found	Medium		0	1.154	19.47	4
High	Master Protein	G7K9E5	Methyl jasmonate esterase OS=Medicago truncatula GN=MTR_5g018320 PE=4 SV=1	0	10.524	18.0769	5	9	1	1	260	29.1	5.43	Not Found	Not Found	Not Found	Not Found	Not Found	Not Found	High	High		0	0.931	23.05	5
High	Master Protein	G7LJC7	Transmembrane protein, putative OS=Medicago truncatula GN=MTR_8g069450 PE=4 SV=1	0	17.975	18.0685	4	5	4	1	321	36.1	6.24	Medium	Not Found	Not Found	Not Found	High	Not Found	High	Not Found		0	0.624	17.76	4
High	Master Protein	A0A072VKA0	Iron-sulfur cluster scaffold protein NFU4 OS=Medicago truncatula GN=MTR_1g069215 PE=4 SV=1	0	16.657	18.0505	3	4	3	1	277	30.5	5.01	Not Found	Not Found	Not Found	High	High	High	High	Not Found		0	0.468	16.68	3
High	Master Protein	A0A072UT49	NAD(P)-binding rossmann-fold protein OS=Medicago truncatula GN=MTR_4g021815 PE=4 SV=1	0	8.829	18.0392	4	4	4	1	255	27.5	6.62	High	Not Found	Not Found	Not Found	Not Found	High	High	Not Found		0	0.778	13.99	4
High	Master Protein	A0A072V386	Fatty acid amide hydrolase-like protein OS=Medicago truncatula GN=MTR_2g010180 PE=4 SV=1	0	57.564	18.0354	10	22	9	1	621	67.6	5.99	High	High	High	High	High	High	High	Not Found		0	0.995	77.9	10
High	Master Protein	G7JES3	DnaJ-class molecular chaperone OS=Medicago truncatula GN=MTR_4g050420 PE=3 SV=1	0	41.863	18.0288	9	12	4	1	416	46.1	6.35	Not Found	Not Found	Not Found	High	Not Found	High	High	Not Found		0	1.371	42.67	9
High	Master Protein	G7JIT9	Glutathione S-transferase-like protein OS=Medicago truncatula GN=MTR_4g084040 PE=4 SV=1	0	22.013	18.0282	5	5	5	1	355	41	7.02	High	High	Not Found	High	High	Not Found	Not Found	Medium		0	0.445	18.08	5
High	Master Protein	G7I3R9	NADH-ubiquinone oxidoreductase 51 kDa subunit OS=Medicago truncatula GN=MTR_1g042300 PE=4 SV=2	0	59.906	18.0124	13	45	13	1	483	52.9	8.27	High	High	High	High	High	High	High	Medium		0	2.162	147.71	13
High	Master Protein	G7JU02	Methionine sulfoxide reductase B 2 OS=Medicago truncatula GN=MTR_4g092800 PE=4 SV=1	0	8.791	17.9894	3	3	3	1	189	20.5	8.68	Not Found	Not Found	Not Found	Not Found	Not Found	High	High	Not Found		0	0.701	8.59	3
High	Master Protein	G7IRG5	DnaJ-class molecular chaperone OS=Medicago truncatula GN=MTR_2g087660 PE=3 SV=1	0	36.099	17.9856	7	11	2	1	417	46.2	6.35	Not Found	High	High	Not Found	Not Found	Not Found	High	Not Found		0	1.154	39.65	7
High	Master Protein	A0A072VPH5	50S ribosomal protein L21 OS=Medicago truncatula GN=MTR_1g096460 PE=3 SV=1	0	21.865	17.9245	2	5	2	1	212	23.6	9.52	Medium	Not Found	Medium	Not Found	Not Found	High	Medium	Not Found		0	0.874	14.73	2
High	Master Protein	A0A072UTH7	Non-specific lipid-transfer protein (Fragment) OS=Medicago truncatula GN=MTR_4g428370 PE=3 SV=1	0	14.817	17.9191	2	7	2	1	173	18.3	9.69	High	High	High	Not Found	High	High	High	Not Found		0	0.778	28	2
High	Master Protein	G7JU55	Drug resistance transporter-like ABC domain protein OS=Medicago truncatula GN=MTR_4g113070 PE=3 SV=2	0	87.219	17.9126	20	39	19	1	1418	161.3	8.37	High	High	High	High	High	High	High	Not Found	Phospho [S12; S14]; Deamidated [Q208; R209]	2	0.677	131.6	20
High	Master Protein	G7IEH0	Glycinin G4 OS=Medicago truncatula GN=MTR_1g072610 PE=3 SV=1	0	48.878	17.9024	7	20	2	1	553	63.5	6.81	Medium	Medium	Medium	High	High	Not Found	Not Found	Not Found		0	1.096	82.49	7
High	Master Protein	G7JAT4	Long-chain-fatty-acid CoA ligase (AMP-forming) OS=Medicago truncatula GN=MTR_3g084470 PE=4 SV=2	0	50.541	17.9021	10	17	9	1	715	80	8.24	Not Found	High	High	High	High	High	High	Not Found		0	0.778	69.1	10
High	Master Protein	A0A072TPW7	Phosphoenolpyruvate carboxylase OS=Medicago truncatula GN=MTR_8g463920 PE=3 SV=1	0	70.272	17.8904	16	22	6	1	967	110.5	5.88	Not Found	Not Found	High	High	High	High	Not Found	Not Found		0	0.749	81.42	16
High	Master Protein	A0A072U0E6	B-cell receptor-associated-like protein OS=Medicago truncatula GN=MTR_7g056133 PE=4 SV=1	0	25.418	17.8899	3	8	3	1	218	24.7	9.22	Not Found	High	High	Not Found	High	High	Not Found	Not Found		0	0.931	35.42	3
High	Master Protein	G7LAL2	Nuclear pore complex Nup155-like protein OS=Medicago truncatula GN=MTR_8g105290 PE=4 SV=1	0	110.35	17.8571	20	35	20	1	1484	162	6.04	High	High	High	High	High	High	High	Not Found		0	0.767	129.69	20
High	Master Protein	A0A072VMF0	Linker histone H1 and h5 family protein OS=Medicago truncatula GN=MTR_1g070440 PE=3 SV=1	0	19.639	17.8571	4	14	4	1	224	23.3	11.09	Not Found	Not Found	High	High	High	High	High	Not Found		0	2.455	41.9	4
High	Master Protein	G7JNX3	Uncharacterized protein OS=Medicago truncatula GN=MTR_4g122180 PE=4 SV=1	0	17.237	17.8571	1	1	1	1	252	19.8	6.11	High	Not Found	Not Found	Not Found	Not Found	Not Found	Not Found	Not Found		0	1.154	11.57	1
High	Master Protein	G7IHU2	Cyclin-like protein OS=Medicago truncatula GN=MTR_2g098850 PE=4 SV=1	0	51.38	17.8535	12	22	10	1	969	107.7	7.36	High	High	Not Found	High	High	High	High	Not Found	Phospho [T788; S793]	2	0.596	73.9	12
High	Master Protein	G7LIZ7	Lipoxygenase OS=Medicago truncatula GN=MTR_8g018730 PE=3 SV=2	0	45.897	17.8241	14	29	9	1	864	96.9	6.21	High	High	High	High	High	High	Not Found	Not Found	Deamidated [Q839]	0	0.887	82.86	14
High	Master Protein	A0A072VPV1	Nuclear fusion defective-like protein OS=Medicago truncatula GN=MTR_1g022360 PE=4 SV=1	0	22.112	17.7843	5	5	5	1	343	38.9	5.81	Not Found	High	High	Not Found	High	Not Found	High	Not Found		0	0.688	16.82	5
High	Master Protein	A0A072U710	Transmembrane protein, putative OS=Medicago truncatula GN=MTR_6g027600 PE=4 SV=1	0	8.756	17.7632	2	2	2	1	152	16.7	7.43	High	Not Found	Not Found	Not Found	Not Found	High	Not Found	Not Found		0	0.778	6.21	2
High	Master Protein	G7JX26	CHUP1-like protein OS=Medicago truncatula GN=MTR_5g053270 PE=4 SV=1	0	56.991	17.7533	16	25	16	1	997	111.2	5.44	High	High	High	High	High	High	High	High		0	0.763	81	16
High	Master Protein	G7K8S5	N-acyl-L-amino-acid amidohydrolase OS=Medicago truncatula GN=MTR_5g058430 PE=4 SV=1	0	22.868	17.7465	5	6	5	1	355	39.2	5.8	Not Found	Medium	Not Found	High	High	High	Medium	Not Found		0	0.509	22.71	5
High	Master Protein	A0A072U5G6	Pathogen-inducible alpha-dioxygenase OS=Medicago truncatula GN=MTR_6g007767 PE=4 SV=1	0	43.615	17.7294	8	9	8	1	643	73.5	7.05	High	Not Found	Not Found	High	High	Not Found	High	Not Found		0	0.567	39.34	8
High	Master Protein	G7KXA9	Aminopeptidase OS=Medicago truncatula GN=MTR_7g084200 PE=4 SV=1	0	50.001	17.7189	7	19	7	1	491	56.7	5.55	Not Found	High	High	High	High	High	High	Not Found		0	1.212	79.11	7
High	Master Protein	A0A072UVP0	ABC-type transport system protein OS=Medicago truncatula GN=MTR_3g040090 PE=4 SV=1	0	24.764	17.713	6	10	6	1	446	48.9	7.01	High	High	Not Found	High	High	Medium	Not Found	Not Found		0	0.743	38.37	6
High	Master Protein	G7L3J8	DEAD-box ATP-dependent RNA helicase-like protein OS=Medicago truncatula GN=MTR_7g076800 PE=3 SV=1	0	26.54	17.7043	6	6	1	1	514	58.7	8.44	Not Found	Not Found	Not Found	Not Found	Not Found	Not Found	High	Not Found		0	0.52	27.43	6
High	Master Protein	A0A072TVH5	Heat shock protein 81-2 OS=Medicago truncatula GN=MTR_0009s0390 PE=3 SV=1	0	35.674	17.6991	11	16	9	1	791	89.8	5.14	High	Medium	Medium	High	High	Not Found	Medium	Not Found		0	0.598	45.97	11
High	Master Protein	A0A072V3E2	Senescence-associated E3 ubiquitin ligase OS=Medicago truncatula GN=MTR_3g115670 PE=4 SV=1	0	97.993	17.6904	13	36	13	1	814	89.4	5.4	High	High	High	High	High	High	High	High	Deamidated [Q53]	0	1.721	151.33	13
High	Master Protein	G7IPM1	Ubiquinol-cytochrome C chaperone protein OS=Medicago truncatula GN=MTR_2g009320 PE=2 SV=1	0	24.668	17.6895	3	6	3	1	277	32.1	9.19	High	Not Found	High	High	Not Found	High	Not Found	Not Found		0	0.931	24.13	3
High	Master Protein	A0A072UE79	ATP-citrate synthase alpha chain protein OS=Medicago truncatula GN=MTR_5g033920 PE=4 SV=1	0	33.977	17.6744	7	17	4	1	430	47.5	6.33	Not Found	High	High	High	Not Found	High	High	Not Found		0	1.683	58.08	7
High	Master Protein	G7L472	Membrane-anchored ubiquitin-fold protein 4 OS=Medicago truncatula GN=MTR_7g012560 PE=4 SV=1	0	5.042	17.6471	2	2	2	1	119	12.9	7.81	Not Found	Not Found	High	High	Not Found	Not Found	Not Found	Not Found		0	0.585	4.83	2
High	Master Protein	A0A072VSU0	ABC transporter B family protein OS=Medicago truncatula GN=MTR_1g115430 PE=4 SV=1	0	105.596	17.6344	17	26	9	1	1395	154.8	6.58	High	High	Not Found	Not Found	High	High	High	Medium		0	0.791	128.27	17
High	Master Protein	A0A072TZG2	Potassium efflux antiporter OS=Medicago truncatula GN=MTR_8g031550 PE=4 SV=1	0	96.084	17.632	16	38	15	1	1174	126.1	5.02	High	High	High	High	High	High	High	High		0	0.921	140.79	16
High	Master Protein	A0A072URD9	Pyruvate orthophosphate dikinase OS=Medicago truncatula GN=MTR_4g118355 PE=4 SV=1	0	13.58	17.6271	7	16	7	1	295	32.3	5.17	High	High	High	High	High	High	High	Not Found		0	1.448	27.23	7
High	Master Protein	G7IG01	Glucan endo-1,3-beta-glucosidase, basic protein OS=Medicago truncatula GN=MTR_2g034440 PE=3 SV=1	0	27.263	17.6119	5	5	2	1	335	37.3	8.53	Not Found	Not Found	Not Found	Not Found	High	Not Found	Not Found	Not Found		0	0.65	22.1	5
High	Master Protein	G7K9T4	SecE/sec61-gamma subunit of protein translocation complex protein OS=Medicago truncatula GN=MTR_5g038520 PE=4 SV=1	0	29.351	17.6101	2	7	2	1	159	17.5	5.01	Not Found	Not Found	Not Found	Not Found	High	High	High	Not Found		0	2.162	47.13	2
High	Master Protein	G7JW29	DnaJ heat shock amino-terminal domain protein OS=Medicago truncatula GN=MTR_5g012530 PE=4 SV=2	0	65.578	17.5926	7	15	7	1	540	59.8	9.04	Not Found	High	High	High	High	Not Found	Not Found	Not Found		0	1.009	78.04	7
High	Master Protein	A0A072TVG7	RAD23 UV excision repair family protein OS=Medicago truncatula GN=MTR_7g407040 PE=4 SV=1	0	23.625	17.5676	3	4	3	1	370	39.6	4.5	Not Found	Not Found	Not Found	High	High	High	Not Found	Not Found		0	0.638	21.98	3
High	Master Protein	Q2MJ20	Cytochrome P450 family protein OS=Medicago truncatula GN=CYP716A12 PE=2 SV=1	0	35.737	17.5365	7	13	7	1	479	54.7	8.72	High	High	High	High	High	Not Found	Not Found	Not Found		0	0.748	50.55	7
High	Master Protein	G7K315	Dihydropyrimidinase OS=Medicago truncatula GN=MTR_5g089280 PE=4 SV=1	0	45.168	17.5277	8	12	7	1	542	59.1	6.49	Not Found	High	High	High	High	Not Found	High	Not Found		0	1.346	45.01	8
High	Master Protein	G7JXK2	Vacuolar protein sorting-associated 35A-like protein OS=Medicago truncatula GN=MTR_5g022610 PE=4 SV=2	0	36.435	17.5063	10	14	10	1	794	89.7	5.29	High	High	High	High	High	High	High	Not Found		0	0.585	50.7	10
High	Master Protein	A0A072UC31	Post-GPI attachment-like factor-protein OS=Medicago truncatula GN=MTR_6g465410 PE=4 SV=1	0	31.544	17.4785	5	23	5	1	349	40.3	7.91	High	High	High	High	High	Not Found	Not Found	Not Found		0	1.683	80.39	5
High	Master Protein	A0A072UNZ7	RAB GTPase-like protein B1C OS=Medicago truncatula GN=MTR_4g098950 PE=4 SV=1	0	24.81	17.4757	4	8	1	1	206	23	7.14	Not Found	Not Found	Not Found	Not Found	Not Found	Medium	Not Found	Not Found		0	0.896	34.06	4
High	Master Protein	G7LGG4	Ferrochelatase OS=Medicago truncatula GN=MTR_8g095320 PE=3 SV=1	0	53.41	17.4573	8	23	6	1	527	58.8	5.35	High	High	High	High	High	High	High	Not Found		0	1.326	89.32	8
High	Master Protein	G7J9U2	Transmembrane 9 superfamily member OS=Medicago truncatula GN=MTR_3g105950 PE=3 SV=1	0	62.082	17.4528	13	24	7	1	636	73.2	8.22	Not Found	High	High	High	Not Found	High	High	Not Found		0	1.955	82.15	13
High	Master Protein	Q2MGQ2	2-oxo acid dehydrogenase, lipoyl-binding site OS=Medicago truncatula GN=MTR_4g084110 PE=2 SV=1	0	8.466	17.4194	1	1	1	1	155	17	4.81	Not Found	Not Found	High	Not Found	Not Found	Not Found	Not Found	Not Found		0	0.259	5.84	1
High	Master Protein	G7IP86	Auxin-responsive family protein OS=Medicago truncatula GN=MTR_2g026080 PE=4 SV=1	0	38.13	17.4129	6	12	6	1	402	44	9.45	High	High	Medium	Not Found	Not Found	High	High	Not Found	Deamidated [Q98; R401]	0	1.994	42.61	6
High	Master Protein	G7L3K0	DEAD-box ATP-dependent RNA helicase-like protein OS=Medicago truncatula GN=MTR_7g076820 PE=3 SV=2	0	27.197	17.3996	6	6	1	1	523	59.7	8.54	Not Found	Not Found	Not Found	Not Found	Not Found	Not Found	High	Not Found		0	0.52	27.38	6
High	Master Protein	G7JMM5	Ubiquinone biosynthesis protein coq-8, putative OS=Medicago truncatula GN=MTR_4g104070 PE=4 SV=2	0	30.964	17.3913	7	14	7	1	483	54.7	8.34	High	High	High	High	High	High	High	Not Found		0	0.719	43.43	7
High	Master Protein	G7IRL3	Dihydroxyacid dehydratase OS=Medicago truncatula GN=MTR_2g089340 PE=3 SV=1	0	27.174	17.3913	9	13	9	1	598	64	6.42	Not Found	High	High	High	High	High	Medium	Not Found		0	0.896	36.08	9
High	Master Protein	A0A072U4F2	TPR superfamily protein OS=Medicago truncatula GN=MTR_7g100328 PE=4 SV=1	0	21.135	17.3789	7	12	7	1	351	40.3	6.39	High	High	Not Found	High	High	High	High	Not Found		0	1.239	31.87	7
High	Master Protein	A0A072UX73	Leucyl-tRNA synthetase OS=Medicago truncatula GN=MTR_3g058540 PE=3 SV=1	0	28.992	17.3489	6	7	6	1	513	57.7	7.94	Not Found	Not Found	Not Found	High	High	High	Not Found	Not Found		0	0.585	28.53	6
High	Master Protein	A0A072V483	Ornithine carbamoyltransferase OS=Medicago truncatula GN=MTR_3g112050 PE=3 SV=1	0	24.756	17.3442	4	6	4	1	369	40.8	7.02	High	High	High	High	Not Found	Not Found	Not Found	Not Found		0	0.616	25.67	4
High	Master Protein	G7JHN1	Enoyl-CoA hydratase/isomerase family protein OS=Medicago truncatula GN=MTR_4g100350 PE=3 SV=2	0	17.469	17.3333	3	3	3	1	300	32.5	8.44	Not Found	Not Found	High	High	High	Not Found	Not Found	Not Found		0	0.389	13.56	3
High	Master Protein	G7I8G8	Chlorophyllide A oxygenase OS=Medicago truncatula GN=MTR_1g030480 PE=4 SV=2	0	38.585	17.3258	8	9	8	1	531	59.8	8	Not Found	High	Medium	High	Not Found	High	Not Found	Not Found		0	0.778	34.86	8
High	Master Protein	A0A072U103	Acetyl-CoA carboxylase, carboxyl transferase, alpha subunit OS=Medicago truncatula GN=MTR_7g066870 PE=3 SV=1	0	85.782	17.3256	10	17	10	1	860	95.4	9.35	Not Found	Not Found	High	High	High	High	High	Not Found	Deamidated [R238; Q496]	0	0.817	77.48	10
High	Master Protein	I3SR78	Glycoprotein family protein OS=Medicago truncatula GN=MTR_7g063520 PE=2 SV=1	0	19.783	17.3228	2	3	2	1	254	28.6	4.54	Not Found	Not Found	Not Found	High	High	Not Found	Not Found	Not Found		0	0.389	21.31	2
High	Master Protein	G7IDS7	Late embryogenesis abundant protein (LEA) family protein OS=Medicago truncatula GN=MTR_1g087320 PE=4 SV=1	0	36.751	17.3077	5	21	5	1	208	23	9.99	High	High	High	High	High	High	High	Not Found	Deamidated [R147]; Phospho [S150]	1	7.254	80.98	5
High	Master Protein	A0A072V1K5	Target SNARE coiled-coil protein OS=Medicago truncatula GN=MTR_3g099773 PE=4 SV=1	0	8.622	17.2932	2	2	2	1	133	14.9	9.89	Not Found	Not Found	Not Found	Not Found	Not Found	Not Found	High	Not Found		0	0.778	7.08	2
High	Master Protein	G7L865	Lactoylglutathione lyase OS=Medicago truncatula GN=MTR_8g102980 PE=3 SV=1	0	21.16	17.2911	7	14	6	1	347	38.8	7.02	High	High	High	High	High	Not Found	Not Found	Not Found		0	0.738	45.51	7
High	Master Protein	G7KH23	LRR receptor-like kinase OS=Medicago truncatula GN=MTR_5g083910 PE=4 SV=1	0	77.372	17.2691	15	23	14	1	996	110.1	6.37	High	High	High	High	High	High	High	High		0	0.794	87.6	15
High	Master Protein	B7FGH5	DNA-directed RNA polymerase II subunit RPB11-like protein OS=Medicago truncatula GN=MTR_4g037750 PE=2 SV=1	0	6.197	17.2414	2	2	2	1	116	13.5	7.56	Not Found	High	Not Found	Not Found	Not Found	High	Not Found	Not Found		0	0.668	4.93	2
High	Master Protein	B7FIP5	ATP-dependent Clp protease proteolytic subunit OS=Medicago truncatula GN=MTR_4g075100 PE=2 SV=1	0	17.513	17.2269	4	5	4	1	238	26.1	7.37	Not Found	Not Found	Not Found	Not Found	High	High	High	Not Found		0	0.668	17.84	4
High	Master Protein	G7JNW9	Dirigent protein OS=Medicago truncatula GN=MTR_4g122130 PE=3 SV=1	0	13.192	17.2222	2	3	2	1	180	20	6.14	Not Found	Not Found	Not Found	High	High	High	Not Found	Not Found		0	0.668	15.4	2
High	Master Protein	G7IP83	Calcium-binding protein OS=Medicago truncatula GN=MTR_2g026050 PE=4 SV=1	0	11.459	17.2107	6	6	2	1	337	39.1	7.4	Not Found	Not Found	Not Found	Not Found	Medium	High	Not Found	Not Found		0	0.65	13.63	6
High	Master Protein	A0A072TJV0	Photosystem I P700 chlorophyll A apoprotein A2 OS=Medicago truncatula GN=MTR_0002s0580 PE=3 SV=1	0	194.584	17.1766	26	167	1	1	1438	160.2	7.23	High	High	High	Not Found	Not Found	Not Found	Not Found	Not Found	Deamidated [Q189; Q466; Q1106; R1114]	0	3.911	500.28	26
High	Master Protein	G7I6D5	Histone H2A OS=Medicago truncatula GN=MTR_1g011750 PE=2 SV=2	0	8.906	17.1642	2	5	1	1	134	14.3	10.39	Not Found	High	High	Not Found	Not Found	Not Found	Not Found	Not Found		0	0.931	16.71	2
High	Master Protein	G7KCZ8	Inhibitor of trypsin and hageman factor-like protein OS=Medicago truncatula GN=MTR_5g090250 PE=4 SV=1	0.001	3.163	17.1429	1	1	1	1	70	7.7	4.65	Not Found	Not Found	Not Found	Not Found	High	Not Found	Not Found	Not Found		0	1.154	2.65	1
High	Master Protein	G7K4B0	ATPase, V0 complex, subunit E OS=Medicago truncatula GN=MTR_5g094130 PE=2 SV=1	0	4.051	17.1429	1	2	1	1	70	7.7	7.03	Not Found	Not Found	Not Found	High	High	Not Found	Not Found	Not Found		0	0.778	6.51	1
High	Master Protein	G7JAF8	ER membrane protein complex subunit-like protein OS=Medicago truncatula GN=MTR_3g106570 PE=2 SV=1	0	23.474	17.1429	3	5	3	1	210	23.4	9.17	High	High	Not Found	High	Not Found	Not Found	Not Found	Not Found		0	1.031	24.04	3
High	Master Protein	A0A072UK26	Nutrient reservoir protein, putative OS=Medicago truncatula GN=MTR_4g062570 PE=4 SV=1	0	25.916	17.1348	4	5	3	1	356	38.4	6.4	Not Found	Not Found	High	High	Not Found	High	Not Found	Not Found		0	0.468	22.32	4
High	Master Protein	G7JVL9	NAD(P)H-quinone oxidoreductase subunit H OS=Medicago truncatula GN=MTR_4g006100 PE=3 SV=1	0	103.586	17.1301	16	44	4	1	899	103.3	5.59	Not Found	Not Found	High	High	High	High	Not Found	Not Found	Deamidated [Q88; Q93]	0	1.783	175.77	16
High	Master Protein	B7FI12	ADP-ribosylation factor-like protein A1D OS=Medicago truncatula GN=MTR_1g086480 PE=2 SV=1	0	26.491	17.1271	5	16	5	1	181	20.7	6.95	High	High	High	High	Not Found	Not Found	Not Found	Not Found		0	2.455	60	5
High	Master Protein	A0A072V5J3	B-cell receptor-associated-like protein OS=Medicago truncatula GN=MTR_2g023880 PE=4 SV=1	0	14.968	17.1171	4	6	3	1	222	25	9.73	Not Found	Not Found	Not Found	Not Found	Not Found	High	High	Not Found		0	1.054	18.89	4
High	Master Protein	G7J6W6	PPR containing plant-like protein OS=Medicago truncatula GN=MTR_3g091460 PE=4 SV=2	0	34.385	17.1157	8	11	8	1	631	71.2	5.72	High	High	High	High	High	High	High	Not Found		0	0.619	41.1	8
High	Master Protein	G7J7T5	NADH ubiquinone oxidoreductase B22-like subunit OS=Medicago truncatula GN=MTR_3g117550 PE=2 SV=1	0	12.03	17.094	2	3	2	1	117	13.7	8.43	Not Found	Not Found	Not Found	High	High	Not Found	Not Found	Not Found		0	0.931	10.87	2
High	Master Protein	A0A072V2Y4	Thioredoxin H-type 1 protein OS=Medicago truncatula GN=MTR_3g112410 PE=4 SV=1	0	4.615	17.094	2	5	2	1	117	12.8	6.16	High	Medium	Not Found	Not Found	High	High	High	Not Found		0	0.668	13.26	2
High	Master Protein	A0A072VPD1	Vicilin 47 kDa protein OS=Medicago truncatula GN=MTR_1g103400 PE=4 SV=1	0	65.111	17.0915	10	22	8	1	667	78.2	7.84	High	High	High	High	High	High	High	Not Found	Deamidated [Q611]	0	0.931	102.5	10
High	Master Protein	G7IU25	Phosphoenolpyruvate carboxylase OS=Medicago truncatula GN=MTR_2g092930 PE=3 SV=1	0	47.311	17.0807	15	20	7	1	966	110.4	6.15	Not Found	High	High	High	High	Not Found	High	Not Found		0	0.638	63.54	15
High	Master Protein	G7JQK5	Saccharopine dehydrogenase OS=Medicago truncatula GN=MTR_4g076230 PE=4 SV=2	0	19.689	17.0616	6	13	6	1	422	45.5	7.36	High	High	High	High	High	High	Not Found	Not Found		0	0.638	35.61	6
High	Master Protein	G7JVF0	Small nuclear ribonucleoprotein OS=Medicago truncatula GN=MTR_4g128050 PE=2 SV=1	0.001	2.902	17.0455	1	1	1	1	88	9.9	4.42	Not Found	Not Found	Not Found	Not Found	Not Found	Not Found	High	Not Found		0	0.585	4.08	1
High	Master Protein	A0A072W1U6	Serine/threonine protein phosphatase 2A regulatory subunit A OS=Medicago truncatula GN=MTR_1g111270 PE=4 SV=1	0	36.576	17.0358	9	13	8	1	587	65.4	5.07	Not Found	High	High	High	High	High	Not Found	Not Found		0	0.753	42.53	9
Low	Master Protein	G7JQH1	Uncharacterized protein OS=Medicago truncatula GN=MTR_4g060620 PE=4 SV=1	0.158	0.437	17.0213	1	1	1	1	94	10.6	7.52	Not Found	Not Found	Not Found	Not Found	Medium	Not Found	Not Found	Not Found		0	0.585	0	1
High	Master Protein	G7I9H2	Calreticulin OS=Medicago truncatula GN=MTR_1g083960 PE=2 SV=1	0	31.563	17.0213	6	14	6	1	423	48.4	4.56	High	High	High	High	High	High	High	Not Found		0	0.682	58.68	6
High	Master Protein	A0A072TSU7	Arabinogalactan protein OS=Medicago truncatula GN=MTR_8g070860 PE=4 SV=1	0	14.531	16.9903	4	6	4	1	206	23.1	7.18	High	Medium	High	Not Found	Not Found	High	Not Found	Not Found		0	1.031	21.4	4
High	Master Protein	G7LDC5	EF hand calcium-binding family protein OS=Medicago truncatula GN=MTR_8g107110 PE=2 SV=1	0	17.456	16.9697	3	4	3	1	165	18.2	4.49	Not Found	Not Found	Not Found	High	Not Found	High	High	Not Found		0	0.701	18.24	3
High	Master Protein	A0A072VLF3	NAD(P)-linked oxidoreductase superfamily protein, putative OS=Medicago truncatula GN=MTR_2g085135 PE=4 SV=1	0.001	3.088	16.9643	2	3	2	1	112	12.4	7.31	Not Found	High	High	Not Found	Not Found	Not Found	Not Found	Medium		0	0.778	7.6	2
High	Master Protein	G7JU59	LRR receptor-like kinase OS=Medicago truncatula GN=MTR_4g113100 PE=4 SV=1	0	40.031	16.9466	12	33	11	1	655	71.4	8.56	High	High	High	Medium	High	High	High	Not Found		0	1.239	89.76	12
High	Master Protein	G7KXJ9	Ribosomal L22e family protein OS=Medicago truncatula GN=MTR_7g112770 PE=2 SV=1	0	4.089	16.9355	2	2	2	1	124	14	9.55	Not Found	Not Found	Medium	Not Found	Not Found	High	Not Found	Not Found		0	0.778	5.93	2
High	Master Protein	B7FIA7	Reticulon-like protein OS=Medicago truncatula GN=MTR_8g099060 PE=2 SV=1	0	13.951	16.9231	4	4	4	1	260	29.3	9.03	Not Found	High	Not Found	Not Found	Medium	Not Found	High	High		0	1.154	14.44	4
High	Master Protein	G7ZW80	30S ribosomal protein S4 OS=Medicago truncatula GN=rps4 PE=3 SV=1	0	9.112	16.9154	5	7	5	1	201	23.2	10.39	High	High	High	High	High	Not Found	High	Not Found		0	1.276	15.28	5
High	Master Protein	A0A072UW90	60 kDa inner membrane protein OS=Medicago truncatula GN=MTR_4g063705 PE=3 SV=1	0	31.994	16.8919	6	12	6	1	444	48.6	9.32	High	High	High	High	High	High	High	High		0	1.239	39.47	6
High	Master Protein	G7IG80	Transmembrane protein, putative OS=Medicago truncatula GN=MTR_2g037940 PE=4 SV=1	0	22.279	16.8919	3	4	3	1	296	32.2	7.15	High	High	Not Found	Not Found	Not Found	Not Found	High	Not Found		0	0.848	19.09	3
High	Master Protein	A0A072UC24	Coiled-coil vesicle tethering protein, putative OS=Medicago truncatula GN=MTR_6g088595 PE=4 SV=1	0	55.867	16.8776	10	13	10	1	711	79.4	5.22	Not Found	Not Found	High	High	High	High	High	Not Found		0	0.677	54.63	10
High	Master Protein	B7FMA6	Eukaryotic translation initiation factor 5A OS=Medicago truncatula GN=MTR_4g109130 PE=2 SV=1	0	26.19	16.875	4	14	4	1	160	17.5	5.78	High	High	High	High	High	Not Found	Not Found	Not Found		0	2.162	41.82	4
High	Master Protein	G7LFK4	Vacuolar H+-ATPase subunit H, putative OS=Medicago truncatula GN=MTR_8g078370 PE=4 SV=2	0	26.274	16.8724	8	18	8	1	486	55.3	7.24	High	High	High	High	High	High	High	Not Found		0	0.778	55.06	8
High	Master Protein	A0A072UEY4	Rhomboid family protein OS=Medicago truncatula GN=MTR_7g107390 PE=4 SV=1	0	38.639	16.8704	4	10	4	1	409	44.7	6.99	Not Found	High	High	High	High	High	Not Found	Not Found		0	1.512	48.43	4
High	Master Protein	G7J622	Enhanced disease susceptibility protein OS=Medicago truncatula GN=MTR_3g079340 PE=4 SV=2	0	36.471	16.8285	8	12	8	1	618	70.7	6.33	High	High	High	High	High	High	Not Found	Not Found		0	0.567	46.37	8
High	Master Protein	A0A072TVM3	TCP-1/cpn60 chaperonin family protein OS=Medicago truncatula GN=MTR_7g406870 PE=3 SV=1	0	31.802	16.8224	9	14	8	1	535	59.3	6.49	High	High	High	High	High	Not Found	High	Not Found		0	0.911	47.33	9
High	Master Protein	G7I3K1	Sterol carrier protein, putative OS=Medicago truncatula GN=MTR_1g019430 PE=2 SV=1	0	6.434	16.8	1	1	1	1	125	13.7	9.38	Not Found	Not Found	Not Found	Not Found	High	Not Found	Not Found	Not Found		0	0.292	5.43	1
High	Master Protein	G7L6M1	50S ribosomal protein L5P OS=Medicago truncatula GN=MTR_7g078800 PE=2 SV=1	0	16.108	16.791	4	8	4	1	268	29.3	9.88	High	High	High	Medium	Medium	High	Not Found	Not Found		0	0.585	21.33	4
High	Master Protein	G7IV12	Cellulose synthase-like protein OS=Medicago truncatula GN=MTR_3g060220 PE=3 SV=1	0	49.991	16.7804	11	19	4	1	733	84.8	8.13	Not Found	Not Found	High	High	High	High	High	Not Found		0	0.738	72.02	11
High	Master Protein	G7JQ33	Drug resistance transporter-like ABC domain protein OS=Medicago truncatula GN=MTR_4g123850 PE=3 SV=2	0	96.504	16.7715	22	63	19	1	1431	162	7.88	High	High	High	High	High	High	High	Not Found	Deamidated [R1074]	0	0.945	211.58	22
High	Master Protein	G7KHJ0	Uncharacterized protein OS=Medicago truncatula GN=MTR_6g005540 PE=4 SV=1	0	25.033	16.763	6	9	6	1	346	38	8.15	High	High	High	High	Not Found	Not Found	High	Not Found		0	1.581	26.71	6
High	Master Protein	G7KGC6	Cytochrome P450 family ferulate hydroxylase OS=Medicago truncatula GN=MTR_5g021390 PE=3 SV=1	0	19.505	16.763	8	10	8	1	519	58.5	6.29	High	High	High	High	High	High	High	Not Found		0	0.719	29.76	8
High	Master Protein	B7FME7	GATA type zinc finger transcription factor family protein OS=Medicago truncatula GN=MTR_3g070050 PE=2 SV=1	0	11.036	16.7539	2	2	2	1	191	20.9	8.92	Not Found	Not Found	Not Found	High	High	Not Found	Not Found	Not Found		0	0.359	11.04	2
High	Master Protein	B7FH64	40S ribosomal S3-like protein OS=Medicago truncatula GN=MTR_1g044660 PE=2 SV=1	0	21.937	16.7364	4	16	4	1	239	26.6	9.64	High	High	High	High	High	High	High	Not Found		0	1.054	54.69	4
High	Master Protein	G7JX40	Serine/Threonine kinase domain protein OS=Medicago truncatula GN=MTR_5g053450 PE=4 SV=1	0	30.246	16.6957	9	15	9	1	575	64.9	9.47	High	High	High	High	High	High	Not Found	Not Found	Deamidated [Q517]	0	0.833	48.38	9
High	Master Protein	G7IQ36	Geranylgeranyl pyrophosphate synthase OS=Medicago truncatula GN=MTR_2g027300 PE=2 SV=1	0	32.927	16.6667	4	8	4	1	342	39.3	5.31	High	High	Not Found	Not Found	High	High	High	Not Found		0	0.931	35.99	4
High	Master Protein	A0A072TRX1	LRR receptor-like kinase OS=Medicago truncatula GN=MTR_8g070880 PE=3 SV=1	0	102.874	16.6667	14	35	12	1	966	106.4	6.15	High	High	High	High	High	High	High	Not Found		0	1.019	139.19	14
High	Master Protein	I3TAN1	Mitochondrial pyruvate carrier OS=Medicago truncatula GN=MTR_1g112340 PE=2 SV=1	0	4.955	16.6667	2	4	2	1	108	12.1	8.88	High	High	High	Not Found	Not Found	High	Not Found	Not Found		0	1.512	9.18	2
High	Master Protein	G7LIL6	O-glycosyl hydrolase family 17 protein OS=Medicago truncatula GN=MTR_8g085720 PE=3 SV=1	0	26.719	16.6667	5	9	5	1	498	53.3	5.68	High	High	High	High	Not Found	Not Found	Not Found	Not Found		0	0.487	36.69	5
High	Master Protein	B7FK44	Eukaryotic translation initiation factor 3 subunit F OS=Medicago truncatula GN=MTR_3g070190 PE=2 SV=1	0	14.961	16.6667	5	9	5	1	288	31.5	5.34	High	High	High	High	Not Found	Not Found	High	Not Found		0	0.688	22.6	5
High	Master Protein	G7JUT2	OSBP(Oxysterol-binding protein)-related protein 4C OS=Medicago truncatula GN=MTR_4g064110 PE=3 SV=1	0	27.405	16.6302	4	5	4	1	457	52.1	5.17	Not Found	Not Found	Not Found	Not Found	High	High	High	Not Found		0	0.425	24.48	4
High	Master Protein	A0A072UY96	Fasciclin-like arabinogalactan protein OS=Medicago truncatula GN=MTR_3g460780 PE=4 SV=1	0	24.835	16.6271	5	10	5	1	421	44.9	5.64	High	High	High	High	Not Found	Not Found	Not Found	Not Found		0	0.931	37.13	5
High	Master Protein	A0A072VYL9	Cytochrome P450 family 709 protein OS=Medicago truncatula GN=MTR_1g085680 PE=3 SV=1	0	26.444	16.6023	6	7	6	1	518	59.4	8.79	High	High	Not Found	High	High	High	Not Found	Not Found		0	0.501	23.31	6
High	Master Protein	G7INY5	LisH and RanBPM domain protein OS=Medicago truncatula GN=MTR_2g012810 PE=4 SV=1	0	7.86	16.5975	3	3	3	1	241	27.3	4.82	Not Found	Not Found	Not Found	High	Not Found	Not Found	High	Not Found		0	0.389	7.81	3
High	Master Protein	G7IAG4	Neutral/alkaline invertase OS=Medicago truncatula GN=MTR_1g096140 PE=4 SV=1	0	31.723	16.5766	8	11	8	1	555	63	6.8	High	Not Found	Medium	High	High	High	High	Not Found		0	0.701	35.7	8
High	Master Protein	G7J9T2	Protein phosphatase 2C-like protein OS=Medicago truncatula GN=MTR_3g105880 PE=2 SV=1	0	25.726	16.5746	4	7	3	1	362	39.9	5.26	Medium	High	High	Medium	Not Found	Not Found	High	Not Found		0	0.492	23.28	4
High	Master Protein	G7I836	Mitochondrial Rho GTPase OS=Medicago truncatula GN=MTR_1g082870 PE=3 SV=1	0	48.938	16.5635	8	12	8	1	646	71.7	5.53	High	High	High	High	High	High	High	Not Found		0	0.896	49.11	8
High	Master Protein	I3T217	Polyketide cyclase/dehydrase and lipid transporter OS=Medicago truncatula GN=MTR_8g045735 PE=2 SV=1	0	5.06	16.5605	3	7	3	1	157	18.1	5.72	High	High	High	Not Found	High	Not Found	High	Not Found		0	0.874	4.43	3
High	Master Protein	I3SKP6	Eukaryotic translation initiation factor 3 subunit J OS=Medicago truncatula GN=MTR_6g478160 PE=2 SV=1	0	15.687	16.5217	3	3	3	1	230	26.2	4.86	Not Found	Not Found	Not Found	High	Not Found	High	Not Found	Not Found		0	0.701	10.01	3
High	Master Protein	G7JFA8	Cytochrome C oxidase OS=Medicago truncatula GN=MTR_4g097800 PE=2 SV=1	0	18.221	16.5049	2	4	2	1	103	11.6	8.21	Not Found	Not Found	High	High	Not Found	Not Found	Not Found	Not Found		0	2.981	20.17	2
High	Master Protein	A0A072VPZ8	Cinnamyl alcohol dehydrogenase-like protein OS=Medicago truncatula GN=MTR_1g107425 PE=4 SV=1	0	17.545	16.4804	4	7	4	1	358	38.9	5.83	High	High	High	High	High	High	Not Found	Not Found		0	0.624	27.78	4
High	Master Protein	G7ICU7	Long-chain fatty acyl CoA ligase OS=Medicago truncatula GN=MTR_1g086600 PE=4 SV=2	0	54.528	16.4723	11	27	8	1	686	77.1	7.66	High	High	High	High	High	High	Not Found	Not Found		0	1.195	92.19	11
High	Master Protein	G7JHL9	LRR receptor-like kinase OS=Medicago truncatula GN=MTR_4g098740 PE=4 SV=2	0	29.206	16.4659	9	16	7	1	498	55.9	6.34	High	Not Found	High	High	High	High	High	Not Found	Deamidated [Q440]	0	1.11	43.91	9
High	Master Protein	A0A072V9B8	Glutathione S-transferase, amino-terminal domain protein OS=Medicago truncatula GN=MTR_2g070060 PE=4 SV=1	0	11.644	16.4384	5	10	4	1	219	25.6	5.78	Not Found	Not Found	High	High	Not Found	Not Found	High	Not Found		0	1.371	25.63	5
High	Master Protein	G7K2J3	60S ribosomal protein L26-1 OS=Medicago truncatula GN=MTR_5g015570 PE=2 SV=2	0	13.231	16.4384	2	3	1	1	146	16.7	11.02	Not Found	Not Found	Not Found	Not Found	Not Found	High	Not Found	Not Found		0	1.683	9.53	2
High	Master Protein	G7KSC5	Ammonium transporter OS=Medicago truncatula GN=MTR_7g069640 PE=3 SV=1	0	63.174	16.4271	9	19	9	1	487	52.2	8.13	High	High	High	High	High	High	Medium	Not Found	Deamidated [R481]	0	2.02	69.3	9
High	Master Protein	Q2HW19	Cupin, RmlC-type OS=Medicago truncatula GN=MTR_7g079770 PE=4 SV=1	0	50.041	16.4147	7	17	1	1	463	53.1	5.59	Not Found	Not Found	Not Found	High	Not Found	Not Found	Not Found	Not Found		0	1.043	82.39	7
High	Master Protein	G7L7B0	NB-ARC domain disease resistance protein OS=Medicago truncatula GN=MTR_8g087650 PE=4 SV=1	0	8.611	16.4103	3	4	1	1	195	21.6	6.54	Not Found	Not Found	High	Not Found	Not Found	Not Found	Not Found	Not Found		0	0.501	13.27	3
High	Master Protein	A0A072TX38	Alpha-1,4-glucan-protein synthase [UDP-forming]-like protein OS=Medicago truncatula GN=MTR_7g015970 PE=4 SV=1	0	19.252	16.3889	5	11	2	1	360	40.7	5.96	High	High	Not Found	Not Found	Not Found	Not Found	Not Found	Not Found		0	0.701	34.86	5
High	Master Protein	A0A072VB81	Vacuolar protein sorting-associated protein OS=Medicago truncatula GN=MTR_3g090170 PE=3 SV=1	0	44.112	16.3732	10	14	10	1	568	65	6.87	High	High	High	High	High	High	Not Found	Not Found		0	1.154	51.7	10
High	Master Protein	G7JBR8	Syntaxin of plants protein OS=Medicago truncatula GN=MTR_3g108160 PE=3 SV=1	0	18.876	16.369	4	5	4	1	336	37.1	9.04	Not Found	Not Found	Not Found	High	High	Not Found	High	Not Found		0	0.624	17.79	4
High	Master Protein	A0A072UC92	White-brown-complex ABC transporter family protein, putative OS=Medicago truncatula GN=MTR_6g066240 PE=4 SV=1	0	60.888	16.3558	9	31	9	1	697	77.8	8.4	High	High	High	High	High	High	High	Not Found	Phospho [S24; S686]	2	1.075	142.86	9
High	Master Protein	G7KZ97	Ethanolamine-phosphate cytidylyltransferase OS=Medicago truncatula GN=MTR_7g074620 PE=4 SV=2	0	66.302	16.3507	7	16	7	1	422	47	8.09	Not Found	High	High	High	High	High	Not Found	Not Found		0	1.61	94.88	7
High	Master Protein	G7JU57	Bile acid:sodium symporter OS=Medicago truncatula GN=MTR_4g113090 PE=2 SV=1	0	27.72	16.3415	6	20	6	1	410	43.8	8.85	High	High	High	High	Not Found	High	High	Not Found		0	1.154	70.07	6
High	Master Protein	G7JQB2	Ribosomal protein OS=Medicago truncatula GN=MTR_4g034810 PE=3 SV=1	0	8.174	16.3399	2	4	2	1	153	17.9	11.4	Not Found	Not Found	High	High	High	Not Found	Not Found	Not Found		0	0.585	12.16	2
High	Master Protein	G7IPF6	2-oxoacid dehydrogenase acyltransferase family protein OS=Medicago truncatula GN=MTR_2g006820 PE=2 SV=1	0	27.905	16.3355	9	16	9	1	453	49.5	9.11	High	High	High	High	High	Not Found	High	Not Found		0	1.212	41.39	9
High	Master Protein	A0A072VNK4	SEC12p-like protein OS=Medicago truncatula GN=MTR_1g090873 PE=4 SV=1	0	21.721	16.3265	7	16	7	1	392	43.5	6.79	Not Found	High	High	High	High	High	Not Found	Not Found		0	1.818	46.85	7
High	Master Protein	G7L7C1	Dynamin 4C-like protein OS=Medicago truncatula GN=MTR_8g087770 PE=3 SV=1	0	33.801	16.3205	9	15	9	1	674	75.3	6.09	High	High	High	High	High	Not Found	High	Not Found		0	0.616	49.47	9
High	Master Protein	A0A072UKS2	PfkB family carbohydrate kinase OS=Medicago truncatula GN=MTR_4g067310 PE=3 SV=1	0	23.136	16.3142	4	10	1	1	331	35.3	5.34	High	Not Found	Not Found	Not Found	Not Found	Not Found	Not Found	Not Found		0	0.551	35.33	4
High	Master Protein	A0A072UWD1	Alpha-1,4 glucan phosphorylase OS=Medicago truncatula GN=MTR_3g462340 PE=3 SV=1	0	66.465	16.3095	13	21	13	1	840	95.4	5.88	High	High	High	High	High	High	High	Not Found		0	1.059	82.92	13
High	Master Protein	G7IG03	Glucan endo-1,3-beta-glucosidase OS=Medicago truncatula GN=MTR_2g034470 PE=3 SV=1	0	28.386	16.2983	5	7	2	1	362	40.3	8.72	Not Found	Not Found	High	High	High	Not Found	Not Found	Not Found		0	0.65	32.82	5
High	Master Protein	B7FK31	UDP-D-glucose/UDP-D-galactose 4-epimerase OS=Medicago truncatula GN=MTR_8g096880 PE=2 SV=1	0	22.61	16.2857	6	11	6	1	350	38.7	8.03	High	High	High	High	Not Found	High	High	Not Found		0	1.228	24.27	6
High	Master Protein	A0A072V136	Transmembrane protein, putative OS=Medicago truncatula GN=MTR_4g105570 PE=4 SV=1	0	26.301	16.2562	2	4	2	1	203	22	9.07	Not Found	Not Found	Not Found	Not Found	Not Found	High	High	High		0	0.778	22.06	2
High	Master Protein	G7I3D6	Rab GTPase activator OS=Medicago truncatula GN=MTR_1g007590 PE=4 SV=1	0	42.652	16.2437	6	9	6	1	591	66.1	5.66	Not Found	High	High	Not Found	High	High	High	Not Found		0	0.501	48.67	6
High	Master Protein	A0A072UFI4	TPR domain protein OS=Medicago truncatula GN=MTR_4g005300 PE=4 SV=1	0	18.068	16.2371	6	6	6	1	388	42.2	6.24	Not Found	Not Found	High	Medium	High	Not Found	High	Not Found		0	0.738	14.93	6
High	Master Protein	G7IHV7	Electron transfer flavoprotein-ubiquinone oxidoreductase, mitochondrial OS=Medicago truncatula GN=MTR_2g099040 PE=3 SV=2	0	45.522	16.2362	6	10	1	1	542	60.3	7.99	Not Found	Not Found	Not Found	High	Not Found	Not Found	Not Found	Not Found		0	0.719	47.24	6
High	Master Protein	G7KJU8	S-adenosyl-L-methionine-dependent methyltransferase OS=Medicago truncatula GN=MTR_6g092630 PE=4 SV=1	0	16.366	16.2338	3	3	3	1	308	34.3	6.79	High	Not Found	Not Found	High	Not Found	Not Found	Not Found	Not Found		0	0.413	16.1	3
High	Master Protein	G7I9F5	Syntaxin of plants protein OS=Medicago truncatula GN=MTR_1g083790 PE=3 SV=1	0	20.887	16.2234	4	4	4	1	376	41.8	8.98	Not Found	Not Found	Not Found	High	High	Not Found	High	Not Found		0	0.551	18.7	4
High	Master Protein	A0A072UHJ0	Ubiquitin-specific protease family C19 protein OS=Medicago truncatula GN=MTR_4g007930 PE=4 SV=1	0	29.727	16.2218	6	8	6	1	487	52.2	9.61	Not Found	High	High	Medium	High	High	Not Found	Not Found		0	0.501	32.58	6
High	Master Protein	G7JLB0	SNARE-interacting KEULE-like protein OS=Medicago truncatula GN=MTR_4g102120 PE=3 SV=1	0	39.053	16.2162	9	12	9	1	666	75.5	8.25	Not Found	Not Found	Medium	High	High	High	High	Not Found		0	0.701	39.72	9
High	Master Protein	G7K6M0	MAP3K-like kinase OS=Medicago truncatula GN=MTR_5g017090 PE=4 SV=1	0	20.722	16.2162	6	13	6	1	407	44.3	7.97	High	High	High	High	High	High	High	Not Found		0	0.61	42.96	6
High	Master Protein	G7K3F3	Peroxisomal small heat shock protein OS=Medicago truncatula GN=MTR_5g091960 PE=3 SV=1	0	19.507	16.2162	3	4	3	1	259	29.1	7.46	Not Found	Not Found	Not Found	High	Not Found	High	Not Found	High		0	0.668	17.28	3
High	Master Protein	B7FIM7	Inorganic pyrophosphatase OS=Medicago truncatula GN=MTR_2g010430 PE=2 SV=1	0	9.168	16.2069	5	8	5	1	290	32.4	6.44	High	Medium	Medium	High	High	Not Found	High	Not Found		0	0.968	17.16	5
High	Master Protein	A0A072UZZ1	Rhodanese/cell cycle control phosphatase superfamily protein OS=Medicago truncatula GN=MTR_3g075540 PE=4 SV=1	0	12.821	16.2069	4	6	4	1	290	32.1	7.44	High	Not Found	High	High	Not Found	Medium	High	Not Found		0	0.848	25.18	4
High	Master Protein	A0A072U4V2	2-hydroxyacyl-CoA lyase OS=Medicago truncatula GN=MTR_6g004200 PE=3 SV=1	0	24.847	16.1972	7	10	7	1	568	60.9	6.73	High	High	High	High	High	High	Not Found	Not Found		0	0.546	37.5	7
High	Master Protein	G7J632	Lipoxygenase OS=Medicago truncatula GN=MTR_3g079450 PE=3 SV=2	0	62.455	16.1863	14	17	8	1	902	103.2	6.51	High	Not Found	Not Found	Not Found	High	High	Not Found	Not Found		0	0.853	59.57	14
High	Master Protein	G7JPU6	NAD-dependent aldehyde dehydrogenase family protein OS=Medicago truncatula GN=MTR_4g107040 PE=3 SV=2	0	38.526	16.1765	8	16	6	1	544	59.2	8.13	High	High	High	Not Found	High	High	High	Not Found		0	0.874	44.31	8
High	Master Protein	G7I879	Transmembrane 9 superfamily member OS=Medicago truncatula GN=MTR_1g014080 PE=3 SV=1	0	49.334	16.1695	10	24	3	1	637	73.1	7.96	High	Not Found	Not Found	High	High	High	Not Found	Not Found		0	1.656	81.8	10
High	Master Protein	G7KAF6	Phospho-2-dehydro-3-deoxyheptonate aldolase OS=Medicago truncatula GN=MTR_5g064500 PE=3 SV=1	0	24.996	16.1654	7	8	5	1	532	59	8.31	Not Found	High	Not Found	High	Not Found	High	High	Not Found		0	0.528	26.41	7
High	Master Protein	A0A072U484	UPF0420 C16orf58-like protein OS=Medicago truncatula GN=MTR_7g096920 PE=4 SV=1	0	21.971	16.1446	8	13	8	1	415	45.9	8.34	High	High	High	High	High	Not Found	Not Found	Not Found		0	1.219	35.69	8
High	Master Protein	G7JW33	40S ribosomal S30-like protein OS=Medicago truncatula GN=MTR_4g100900 PE=4 SV=1	0.001	2.942	16.129	1	2	1	1	62	6.9	12.03	High	High	Not Found	Not Found	Not Found	Not Found	Not Found	Not Found		0	1.154	5.37	1
High	Master Protein	A0A072VCP7	Kunitz type trypsin inhibitor OS=Medicago truncatula GN=MTR_3g106585 PE=4 SV=1	0	18.327	16.1137	2	3	2	1	211	23	5.35	Not Found	Not Found	Not Found	High	Not Found	Not Found	Not Found	Not Found		0	1.154	17.75	2
High	Master Protein	Q2HVG4	Alkaline phytoceramidase OS=Medicago truncatula GN=MTR_2g025540 PE=4 SV=1	0	27.915	16.0784	3	17	2	1	255	29.9	8.69	High	High	High	High	High	Not Found	Not Found	Not Found		0	1.929	78.13	3
High	Master Protein	A0A072UCX0	Resistance to phytophthora protein, putative OS=Medicago truncatula GN=MTR_7g094220 PE=4 SV=1	0	12.123	16.055	3	6	3	1	218	24.5	8.54	High	Medium	Not Found	High	High	High	Not Found	Not Found		0	0.701	18.23	3
High	Master Protein	G7JDJ4	Aconitate hydratase OS=Medicago truncatula GN=MTR_4g048190 PE=3 SV=1	0	93.884	16.0368	13	33	1	1	979	107.3	7.59	Not Found	Not Found	Not Found	Not Found	Medium	Not Found	Not Found	Not Found		0	0.856	129.11	13
High	Master Protein	I3SVH0	Sec-independent protein translocase TatC OS=Medicago truncatula GN=MTR_1g109080 PE=2 SV=1	0	69.817	16.035	7	18	7	1	343	37.8	5.36	Not Found	Not Found	High	High	High	High	High	High		0	3.87	106.24	7
High	Master Protein	G7ISJ0	3,8-divinyl protochlorophyllide A 8-vinyl reductase OS=Medicago truncatula GN=MTR_2g020160 PE=4 SV=1	0	27.98	16.0194	5	8	5	1	412	45.7	7.33	Not Found	Not Found	High	High	High	Medium	Not Found	Not Found		0	0.557	34.84	5
High	Master Protein	G7I505	Arsenical pump-driving ATPase-like protein OS=Medicago truncatula GN=MTR_1g094680 PE=4 SV=2	0	24.314	16.0099	5	9	4	1	406	44.1	7.8	Not Found	Not Found	Not Found	High	High	High	High	Not Found		0	0.738	32.46	5
High	Master Protein	A0A072U6Y5	Serine/Threonine-kinase HT1-like protein OS=Medicago truncatula GN=MTR_6g007603 PE=4 SV=1	0	15.779	16	7	17	2	1	375	42.1	7.59	Not Found	Not Found	Not Found	Not Found	High	High	Not Found	High	Deamidated [Q25; R271]	0	0.978	39.12	7
High	Master Protein	G7INP9	Transmembrane 9 superfamily member OS=Medicago truncatula GN=MTR_2g006300 PE=3 SV=1	0	59.88	15.952	9	20	5	1	583	66.4	7.68	High	High	High	High	High	Not Found	High	Not Found		0	1.395	82.6	9
High	Master Protein	G7I6H0	IQ calmodulin-binding motif protein OS=Medicago truncatula GN=MTR_1g023760 PE=4 SV=1	0	49.284	15.9439	8	14	8	1	784	85.8	6.34	High	High	High	High	High	High	High	Not Found	Phospho [S381]	0	0.49	56.43	8
High	Master Protein	G7LDX9	Alpha/beta fold hydrolase OS=Medicago truncatula GN=MTR_8g077290 PE=4 SV=1	0	13.951	15.9236	4	7	4	1	314	34.9	9.09	Not Found	High	High	High	High	Not Found	Not Found	Not Found		0	0.833	26.57	4
High	Master Protein	G7IMA2	Small nuclear ribonucleoprotein OS=Medicago truncatula GN=MTR_2g104440 PE=2 SV=1	0	4.441	15.9091	1	1	1	1	88	10.3	9.92	Not Found	Not Found	Not Found	Not Found	Not Found	Not Found	High	Not Found		0	0.585	4.34	1
High	Master Protein	A0A072V987	Class I glutamine amidotransferase superfamily protein OS=Medicago truncatula GN=MTR_2g078060 PE=4 SV=1	0	13.297	15.9091	6	9	6	1	440	46.8	7.23	Not Found	Not Found	High	High	High	High	High	Not Found	Deamidated [Q250]	0	0.562	25.05	6
High	Master Protein	A0A072TWK0	Patatin OS=Medicago truncatula GN=MTR_8g007140 PE=3 SV=1	0	26.111	15.8924	7	12	6	1	409	44.9	5.48	High	High	High	Not Found	Not Found	High	High	Not Found	Deamidated [Q312]	0	1.637	35.03	7
High	Master Protein	A0A072VLT9	3-ketoacyl-CoA synthase OS=Medicago truncatula GN=MTR_1g076430 PE=3 SV=1	0	27.907	15.8915	7	11	6	1	516	58.1	8.81	High	High	Not Found	High	High	Not Found	Not Found	Not Found	Deamidated [Q251; Q254]	0	0.751	31.45	7
High	Master Protein	B7FIS2	Translocon-associated protein alpha subunit OS=Medicago truncatula GN=MTR_3g117740 PE=2 SV=1	0	17.67	15.8915	3	11	3	1	258	28.1	5.12	High	High	High	High	High	High	Not Found	Not Found		0	0.874	42.81	3
High	Master Protein	I3SIE3	RAB GTPase-like protein C2B OS=Medicago truncatula GN=MTR_7g103070 PE=2 SV=1	0	14.505	15.8879	4	6	3	1	214	23.4	6.23	High	High	High	Not Found	Not Found	High	High	Not Found		0	0.931	15.89	4
High	Master Protein	G7KBX4	Microsomal signal peptidase 25 kDa subunit OS=Medicago truncatula GN=MTR_5g081900 PE=4 SV=2	0	10.243	15.873	3	6	3	1	189	21.3	8.9	High	High	High	Not Found	High	High	Not Found	Not Found		0	0.874	17.61	3
High	Master Protein	G7ISD7	Ribosomal protein L15 OS=Medicago truncatula GN=MTR_2g014220 PE=3 SV=1	0	6.087	15.873	4	8	4	1	252	29.7	11.52	Not Found	High	High	High	Not Found	Not Found	Not Found	Not Found		0	1.031	20.5	4
High	Master Protein	A0A072UM96	LRR receptor-like kinase OS=Medicago truncatula GN=MTR_4g065003 PE=4 SV=1	0	30.079	15.8537	7	11	3	1	492	55.5	6.43	Not Found	High	High	Not Found	High	Not Found	Not Found	Not Found		0	0.719	37.94	7
High	Master Protein	G7LBQ7	Glycerol-3-phosphate acyltransferase OS=Medicago truncatula GN=MTR_8g030620 PE=4 SV=1	0	58.05	15.8416	8	28	8	1	505	56	9.31	High	High	High	High	High	High	Not Found	Not Found		0	0.884	114.18	8
High	Master Protein	G7JCM9	Phospholipase A1 OS=Medicago truncatula GN=MTR_4g080100 PE=4 SV=1	0	45.079	15.8371	7	19	7	1	442	49.9	5.88	High	High	High	High	High	High	High	Not Found		0	1.848	85.6	7
High	Master Protein	A2Q5A6	NADH-quinone oxidoreductase subunit C OS=Medicago truncatula GN=ndhJ PE=3 SV=1	0	30.985	15.8228	3	21	3	1	158	18.6	6.64	High	High	High	High	High	High	Not Found	Not Found		0	2.981	72.51	3
High	Master Protein	G7KSE8	Phosphoglycolate phosphatase-like protein OS=Medicago truncatula GN=MTR_7g080530 PE=4 SV=1	0	19.3	15.8038	5	11	5	1	367	40.3	7.3	High	High	High	High	High	High	High	Not Found		0	0.65	35.4	5
High	Master Protein	A0A072UBA4	Transmembrane protein, putative OS=Medicago truncatula GN=MTR_6g486230 PE=4 SV=1	0	9.239	15.7895	2	5	2	1	171	15.4	8.57	High	High	High	Not Found	Not Found	Not Found	Not Found	Not Found		0	1.154	15.29	2
High	Master Protein	A0A072U4H1	Heat shock protein-binding protein OS=Medicago truncatula GN=MTR_7g115670 PE=4 SV=1	0	26.839	15.7895	4	12	4	1	266	29.5	9.47	High	High	High	Medium	Not Found	High	High	High		0	1.894	35.7	4
High	Master Protein	G7K8X5	Ubiquitin-fold modifier 1 OS=Medicago truncatula GN=MTR_5g059210 PE=2 SV=1	0	5.133	15.7895	1	1	1	1	95	10.2	9.25	High	Not Found	Not Found	Not Found	Not Found	Not Found	Not Found	Not Found		0	0.389	2.93	1
High	Master Protein	A0A072TYM4	Ribosomal protein L7Ae/L30e/S12e/Gadd45 family protein OS=Medicago truncatula GN=MTR_7g027235 PE=4 SV=1	0	15.136	15.7692	5	8	3	1	260	29.5	10.27	Not Found	High	High	High	Not Found	Not Found	Not Found	Not Found		0	0.968	21.07	5
High	Master Protein	G7KK16	p-loop nucleoside triphosphate hydrolase superfamily protein OS=Medicago truncatula GN=MTR_6g009520 PE=3 SV=1	0	35.286	15.7692	8	17	4	1	520	60.7	7.06	High	Not Found	High	High	High	Not Found	Not Found	Not Found		0	0.863	52.21	8
High	Master Protein	G7JRE7	Chaperone dnaJ-like protein OS=Medicago truncatula GN=MTR_4g035650 PE=4 SV=2	0	16.242	15.7051	4	6	4	1	312	34.3	6.83	High	High	Not Found	Not Found	High	High	High	Not Found	Deamidated [Q86; Q89]	0	0.778	18.23	4
High	Master Protein	G7KEJ5	ER membrane protein complex subunit-like protein OS=Medicago truncatula GN=MTR_5g096260 PE=2 SV=1	0	18.229	15.6863	2	4	2	1	204	22.9	5.59	Not Found	Not Found	Not Found	High	High	Not Found	Not Found	Not Found		0	0.638	17.16	2
High	Master Protein	G7KKA7	Oligosaccharyltransferase subunit STT3 OS=Medicago truncatula GN=MTR_6g077750 PE=4 SV=1	0	81.692	15.6809	12	33	12	1	727	81.6	8.87	High	High	High	High	High	High	High	Not Found	Deamidated [R651]	0	1.3	132.98	12
High	Master Protein	G7JLQ8	Calcium-binding protein OS=Medicago truncatula GN=MTR_4g133600 PE=4 SV=2	0	12.004	15.6658	6	7	2	1	383	43.7	8.24	Not Found	Not Found	Not Found	Not Found	Not Found	High	High	Not Found		0	0.557	17.44	6
High	Master Protein	G8A1D5	Cyclin-dependent kinase OS=Medicago truncatula GN=MTR_4g094430 PE=3 SV=1	0	18.214	15.6463	3	3	2	1	294	33.9	6.95	Not Found	Not Found	High	High	Not Found	Not Found	Not Found	Not Found		0	0.413	13.3	3
High	Master Protein	I3SY47	Plant/F1L3-4 protein, putative OS=Medicago truncatula GN=MTR_8g017610 PE=2 SV=1	0	4.793	15.625	1	1	1	1	96	10.8	5.39	Not Found	Not Found	Not Found	High	Not Found	Not Found	Not Found	Not Found		0	0.468	4.47	1
High	Master Protein	G7KWV3	Pyruvate dehydrogenase (Acetyl-transferring) kinase OS=Medicago truncatula GN=MTR_7g024460 PE=4 SV=2	0	14.753	15.6085	5	6	2	1	378	42.7	6.61	Not Found	Not Found	Not Found	Not Found	High	High	Not Found	Not Found		0	0.509	13.88	5
High	Master Protein	A0A072TFU7	60S ribosomal protein L37a-2 OS=Medicago truncatula GN=MTR_0199s0040 PE=3 SV=1	0	7.614	15.6069	2	2	2	1	173	19.7	10.65	Not Found	Not Found	Not Found	High	Not Found	Not Found	Not Found	Not Found		0	0.425	7.43	2
High	Master Protein	G7I4H1	Patatin OS=Medicago truncatula GN=MTR_1g019940 PE=3 SV=1	0	23.85	15.5875	3	4	3	1	417	46	6.21	Not Found	High	Not Found	Not Found	High	High	Not Found	Not Found		0	0.318	29.15	3
High	Master Protein	A0A072UND0	SEC12p-like protein OS=Medicago truncatula GN=MTR_4g084650 PE=4 SV=1	0	28.977	15.5718	4	6	4	1	411	44.6	5.96	High	High	Not Found	High	High	Not Found	Not Found	Not Found		0	0.585	27.75	4
High	Master Protein	A0A072VR08	Kynurenine formamidase-like protein OS=Medicago truncatula GN=MTR_1g107510 PE=4 SV=1	0	17.554	15.5556	4	7	4	1	270	29.6	5.24	High	High	High	High	High	Not Found	Not Found	Not Found	Deamidated [R143]	0	1.581	20.35	4
High	Master Protein	G7J3G3	Peptidyl-tRNA hydrolase II (PTH2) family protein OS=Medicago truncatula GN=MTR_3g109700 PE=2 SV=1	0	19.192	15.544	2	5	2	1	193	21	9.61	High	High	High	High	Not Found	Not Found	Not Found	Not Found		0	0.874	22.92	2
High	Master Protein	G7LDH0	Dynamin 1E-like protein OS=Medicago truncatula GN=MTR_8g009510 PE=3 SV=1	0	37.196	15.5416	9	11	9	1	637	71.4	6.57	High	High	High	High	High	High	Not Found	Not Found		0	0.708	35.24	9
High	Master Protein	G7L8U4	2Fe-2S ferredoxin superfamily protein OS=Medicago truncatula GN=MTR_8g088720 PE=4 SV=1	0	5.318	15.5405	2	4	2	1	148	15.8	4.68	Not Found	Not Found	Not Found	Not Found	Not Found	High	High	Not Found		0	1.154	14.08	2
High	Master Protein	A0A072V1D5	Patellin-3 protein OS=Medicago truncatula GN=MTR_3g097350 PE=4 SV=1	0	31.793	15.5323	6	8	4	1	573	64	4.83	Not Found	Not Found	Not Found	Not Found	High	High	High	Not Found		0	0.501	33.4	6
High	Master Protein	G7J2E8	DUF399 family protein OS=Medicago truncatula GN=MTR_3g071970 PE=4 SV=1	0	39.285	15.5128	9	9	9	1	780	86.4	8.21	High	High	Not Found	Not Found	High	High	High	High		0	0.554	38.01	9
High	Master Protein	I3SC37	Allergenic isoflavone reductase-like protein Bet protein OS=Medicago truncatula GN=MTR_3g111980 PE=2 SV=1	0	13.603	15.4839	3	7	3	1	310	34.3	6.67	High	High	High	High	Not Found	Not Found	Not Found	Not Found		0	0.52	27.02	3
High	Master Protein	G7LDE8	Pigment defective 320 protein, putative OS=Medicago truncatula GN=MTR_8g009290 PE=4 SV=1	0	34.945	15.4839	5	12	5	1	465	52.2	8.59	High	High	High	High	High	High	High	Not Found		0	0.905	50.94	5
High	Master Protein	S4T097	Photosystem I assembly protein Ycf3 OS=Medicago truncatula GN=ycf3 PE=3 SV=1	0	5.426	15.4762	2	2	2	1	168	19.5	5.34	Not Found	Not Found	Not Found	High	High	Not Found	Not Found	Not Found		0	0.425	6.73	2
High	Master Protein	A0A072VE85	Serine/Threonine kinase, ABC1 family protein OS=Medicago truncatula GN=MTR_1g009860 PE=4 SV=1	0	35.293	15.4434	8	13	8	1	654	73.4	5.43	High	High	High	High	High	High	Not Found	Not Found		0	0.492	39.02	8
High	Master Protein	A0A072VIE6	NEDD8 ultimate buster-like protein OS=Medicago truncatula GN=MTR_2g450730 PE=4 SV=1	0	42.675	15.4412	5	6	5	1	544	61	5.22	Not Found	Not Found	Not Found	High	High	High	Not Found	Not Found		0	0.54	29.19	5
High	Master Protein	I3SWK6	Epoxide hydrolase OS=Medicago truncatula GN=MTR_4g089040 PE=2 SV=1	0	19.612	15.4341	5	7	5	1	311	34.9	5.4	High	High	High	High	High	Not Found	Not Found	Not Found		0	0.73	21.87	5
High	Master Protein	A5H2U6	High affinity inorganic phosphate transporter OS=Medicago truncatula GN=MTR_1g074930 PE=2 SV=1	0	24.986	15.4275	7	13	5	1	538	58.9	8.4	High	High	High	Not Found	Medium	Not Found	High	High		0	0.668	43.36	7
High	Master Protein	G7LC12	26S proteasome non-ATPase regulatory subunit-like protein OS=Medicago truncatula GN=MTR_8g075390 PE=4 SV=1	0	27.47	15.4242	5	6	4	1	389	41.4	4.75	Not Found	Not Found	Not Found	High	High	High	Not Found	Not Found		0	0.688	26.26	5
High	Master Protein	G7LDT1	Multidrug resistance protein ABC transporter family protein OS=Medicago truncatula GN=MTR_8g061970 PE=4 SV=1	0	94.327	15.4206	20	49	6	1	1498	167.5	7.39	High	Not Found	High	High	High	High	High	High	Deamidated [Q1346]	0	0.799	155.98	20
High	Master Protein	A0A072V5G1	Multidrug resistance protein ABC transporter family protein OS=Medicago truncatula GN=MTR_2g436730 PE=4 SV=1	0	98.101	15.4103	19	55	1	1	1499	167.8	7.78	Not Found	Not Found	Not Found	High	Not Found	Not Found	Not Found	Not Found	Deamidated [Q1347]	0	0.768	180.4	19
High	Master Protein	G7JPH8	Photosystem II stability/assembly factor HCF136 OS=Medicago truncatula GN=MTR_4g075040 PE=4 SV=1	0	14.254	15.404	5	8	5	1	396	43.7	8.03	High	High	High	Not Found	Not Found	High	High	Not Found		0	0.778	23.27	5
High	Master Protein	A0A072TQQ6	SPFH/band 7/PHB domain membrane-associated family protein OS=Medicago truncatula GN=MTR_8g469160 PE=4 SV=1	0	8.664	15.3846	4	13	2	1	286	31.6	5.74	Not Found	High	Not Found	Not Found	Medium	Not Found	Not Found	Not Found		0	0.778	31.12	4
High	Master Protein	A0A072UKQ3	Lactoylglutathione lyase OS=Medicago truncatula GN=MTR_4g057685 PE=3 SV=1	0	22.504	15.3846	3	5	3	1	234	26.7	9.01	Not Found	High	High	Not Found	Not Found	High	High	Not Found		0	0.668	21.3	3
High	Master Protein	A0A072U9P1	DUF21 domain plant protein OS=Medicago truncatula GN=MTR_6g045467 PE=4 SV=1	0	34.783	15.3846	6	7	2	1	468	51.1	5.44	Not Found	Not Found	Not Found	Not Found	High	High	High	Not Found		0	0.778	26.32	6
High	Master Protein	G7IBZ4	Thioredoxin OS=Medicago truncatula GN=MTR_1g098660 PE=2 SV=1	0	7.116	15.3846	2	2	2	1	169	18.7	8.81	Not Found	Not Found	Not Found	Not Found	High	High	Not Found	Not Found		0	0.425	6.41	2
High	Master Protein	G7KK36	ERD (Early-responsive to dehydration stress) family protein OS=Medicago truncatula GN=MTR_4g132570 PE=4 SV=1	0	68.884	15.3747	13	27	13	1	774	88.2	9.19	High	High	High	High	High	High	High	Medium		0	1.085	95.77	13
High	Master Protein	G7ISZ4	Signal peptide peptidase A (SppA) 36 kDa type protein OS=Medicago truncatula GN=MTR_2g058970 PE=4 SV=1	0	63.923	15.3731	8	19	7	1	670	74.3	9.04	High	High	High	High	High	High	Medium	Not Found		0	0.901	84.12	8
High	Master Protein	A0A072VI48	AGC kinase OS=Medicago truncatula GN=MTR_1g442790 PE=4 SV=1	0	30.87	15.3704	6	8	2	1	540	62.5	7.84	Not Found	Not Found	Not Found	Not Found	Not Found	Not Found	High	Not Found	Phospho [S309; T310]	2	0.528	22.69	6
High	Master Protein	A0A072UPB6	Ubiquinol oxidase OS=Medicago truncatula GN=MTR_4g094222 PE=3 SV=1	0	24.244	15.3623	5	12	3	1	345	39.3	9.2	High	High	High	Not Found	Not Found	Not Found	Not Found	Not Found	Deamidated [R103]	0	1.154	39.19	5
High	Master Protein	G7IYE3	Methylesterase OS=Medicago truncatula GN=MTR_3g005410 PE=4 SV=2	0	25.789	15.3623	5	9	5	1	345	38.4	8.38	Not Found	High	High	High	High	High	Not Found	Not Found		0	1.239	39.52	5
High	Master Protein	G7KY05	RAB GTPase-like protein A1D OS=Medicago truncatula GN=MTR_7g051940 PE=4 SV=1	0	8.076	15.3488	3	5	1	1	215	24	4.89	Not Found	Not Found	Not Found	High	Medium	Not Found	Not Found	Not Found		0	0.413	12.36	3
High	Master Protein	A0A072V5N2	Methyltransferase PMT2-like protein OS=Medicago truncatula GN=MTR_3g040370 PE=4 SV=1	0	39.613	15.3465	8	13	5	1	606	68.3	6.87	Medium	High	Medium	High	Not Found	Not Found	High	Not Found		0	0.805	43.39	8
High	Master Protein	G7INP0	Plastid developmental protein DAG, putative OS=Medicago truncatula GN=MTR_2g006210 PE=4 SV=1	0	25.291	15.3374	5	8	5	1	489	54.6	7.83	Not Found	Not Found	Not Found	High	High	Not Found	Not Found	Not Found	Deamidated [Q424; Q425]	0	0.532	26.05	5
High	Master Protein	A0A072TM93	Inactive purple acid phosphatase-like protein OS=Medicago truncatula GN=MTR_8g023780 PE=4 SV=1	0	26.335	15.3302	3	9	3	1	424	46.6	8.24	Not Found	High	High	High	High	Not Found	Not Found	Not Found		0	0.468	39.54	3
High	Master Protein	A0A072THS2	Ribosomal protein OS=Medicago truncatula GN=MTR_0059s0060 PE=3 SV=1	0	21.203	15.3203	4	6	4	1	359	39.4	8.88	High	High	High	High	High	High	Not Found	Not Found		0	0.445	27.2	4
High	Master Protein	I3T560	Superoxide dismutase OS=Medicago truncatula GN=MTR_3g094250 PE=2 SV=1	0	9.977	15.3191	3	4	3	1	235	26.3	8.27	High	High	Not Found	Not Found	High	High	Not Found	Not Found		0	0.501	14.42	3
High	Master Protein	G7J1T1	RNA-binding (RRM/RBD/RNP motif) family protein OS=Medicago truncatula GN=MTR_3g027140 PE=4 SV=1	0	11.612	15.3191	2	4	2	1	235	25.7	9.48	Not Found	Not Found	High	High	Not Found	Not Found	Not Found	Not Found		0	0.359	17.67	2
High	Master Protein	G7J6B7	NAD(P)-binding rossmann-fold protein OS=Medicago truncatula GN=MTR_3g101500 PE=4 SV=1	0	22.673	15.3153	4	10	4	1	333	36.5	8.44	High	High	High	High	High	High	Not Found	Not Found		0	0.778	38.45	4
High	Master Protein	G7LE74	Transmembrane protein, putative OS=Medicago truncatula GN=MTR_8g107430 PE=4 SV=1	0	41.197	15.3061	4	8	4	1	196	21.8	9.6	Not Found	High	High	High	High	Not Found	Not Found	Not Found		0	1.848	49.91	4
High	Master Protein	G7INW2	Phosphatase 2C family protein OS=Medicago truncatula GN=MTR_2g008850 PE=4 SV=1	0	13.093	15.3025	4	7	3	1	281	30.8	6.44	High	High	Not Found	Medium	High	High	Not Found	Not Found	Deamidated [Q193]	0	0.624	20.72	4
High	Master Protein	G7LCC0	26S proteasome regulatory complex component OS=Medicago truncatula GN=MTR_8g106120 PE=4 SV=1	0	60.191	15.2847	13	23	13	1	1001	108.7	5.29	Not Found	High	Not Found	High	High	High	High	High		0	0.943	83.76	13
High	Master Protein	A0A072TXV1	Nodulin-like/MFS transporter OS=Medicago truncatula GN=MTR_7g029015 PE=4 SV=1	0	38.584	15.2801	8	29	8	1	589	63.9	8.09	High	High	High	High	High	High	High	Not Found		0	1.254	97.18	8
High	Master Protein	G7L8U5	Transmembrane 9 superfamily member OS=Medicago truncatula GN=MTR_8g088730 PE=3 SV=1	0	41.071	15.2801	8	13	4	1	589	67.4	8.21	High	Not Found	High	Not Found	High	Not Found	High	Not Found		0	0.951	54.65	8
High	Master Protein	G7IAZ3	TMPIT-like protein OS=Medicago truncatula GN=MTR_1g116510 PE=4 SV=1	0	25.625	15.2355	6	10	6	1	361	41.3	9.35	High	Not Found	Not Found	High	High	High	High	Not Found		0	1.239	31.25	6
High	Master Protein	G7K1N4	ADP-ribosylation factor-like protein A1D OS=Medicago truncatula GN=MTR_5g078090 PE=2 SV=1	0	10.298	15.2174	2	6	2	1	184	20.6	8.13	Not Found	High	Not Found	High	High	High	Not Found	Not Found		0	0.701	20.39	2
High	Master Protein	B7FMP6	Nucleoside diphosphate kinase OS=Medicago truncatula GN=MTR_4g104030 PE=2 SV=1	0	11.788	15.2174	3	6	3	1	230	25.5	8.57	High	High	High	High	Not Found	Not Found	Not Found	Not Found		0	0.54	21.62	3
High	Master Protein	B7FMU8	Emp24/gp25L/p24 family protein OS=Medicago truncatula GN=MTR_3g072600 PE=2 SV=1	0	28.06	15.2074	4	11	4	1	217	24.1	8.85	High	High	High	High	High	High	High	Not Found		0	2.162	50.31	4
High	Master Protein	G7IUE0	LRR receptor-like kinase family protein OS=Medicago truncatula GN=MTR_2g098250 PE=4 SV=1	0	22.76	15.2	6	7	6	1	375	40.8	8.57	Not Found	Not Found	Not Found	High	High	High	Not Found	Not Found		0	0.701	22.78	6
High	Master Protein	G7K274	Outer membrane OMP85 family protein OS=Medicago truncatula GN=MTR_5g083050 PE=4 SV=2	0	25.533	15.1923	7	9	7	1	520	58.7	5.73	Not Found	High	High	Not Found	High	High	Not Found	Not Found		0	0.63	26.76	7
High	Master Protein	G7JTZ5	Aldo/keto reductase family oxidoreductase OS=Medicago truncatula GN=MTR_4g092750 PE=4 SV=1	0	19.643	15.1899	3	3	3	1	316	34.3	5.57	Not Found	Not Found	Not Found	High	Not Found	Not Found	High	Not Found		0	0.468	15.63	3
High	Master Protein	A0A072TTF9	Transmembrane protein, putative OS=Medicago truncatula GN=MTR_8g089995 PE=4 SV=1	0	12.452	15.1724	4	5	4	1	290	32.4	9.58	Not Found	High	High	High	Not Found	High	Not Found	Not Found		0	0.778	13.53	4
High	Master Protein	G7JGW7	Alpha/beta fold hydrolase OS=Medicago truncatula GN=MTR_4g010000 PE=4 SV=2	0	36.444	15.1436	3	5	3	1	383	42.5	8.62	High	Not Found	Not Found	Not Found	High	High	Not Found	Not Found		0	0.688	29.95	3
High	Master Protein	G7J2L7	TCP-1/cpn60 chaperonin family protein OS=Medicago truncatula GN=MTR_3g086330 PE=2 SV=1	0	22.525	15.1402	6	8	6	1	535	59.2	5.66	Not Found	High	Not Found	High	High	High	High	High		0	0.438	33.33	6
High	Master Protein	G7IP18	Stem-specific TSJT1-like protein OS=Medicago truncatula GN=MTR_2g013140 PE=4 SV=1	0	19.341	15.1394	3	12	3	1	251	27.5	7.52	High	High	High	High	High	Not Found	Not Found	Not Found		0	0.968	44.45	3
High	Master Protein	G7K4T4	Fructose-bisphosphate aldolase OS=Medicago truncatula GN=MTR_5g096670 PE=2 SV=1	0	28.471	15.1261	5	9	4	1	357	38.3	6.15	Not Found	High	High	High	High	Not Found	Not Found	Not Found		0	1.069	32.33	5
High	Master Protein	A0A072V7D4	Multidrug resistance protein ABC transporter family protein OS=Medicago truncatula GN=MTR_2g436710 PE=4 SV=1	0	94.247	15.1233	19	47	4	1	1501	168	7.99	High	High	Not Found	Not Found	High	High	High	Not Found	Deamidated [Q1349]	0	0.726	148.13	19
High	Master Protein	A0A072UX27	Cytochrome C biogenesis protein Ccs1 OS=Medicago truncatula GN=MTR_4g069080 PE=3 SV=1	0	38.051	15.1184	5	10	5	1	549	60.3	7.33	Not Found	High	High	High	High	Not Found	Not Found	Not Found		0	0.54	43.76	5
High	Master Protein	G7JW56	60S ribosomal L8-like protein OS=Medicago truncatula GN=MTR_5g021800 PE=4 SV=1	0	9.622	15.1163	4	6	1	1	258	28	10.56	Not Found	Not Found	Not Found	High	Not Found	Not Found	Not Found	Not Found		0	0.719	16.45	4
High	Master Protein	G7JBW9	Outer membrane OMP85 family protein OS=Medicago truncatula GN=MTR_3g071450 PE=4 SV=1	0	27.812	15.1163	9	22	9	1	516	57.7	6.55	High	High	High	High	High	High	Medium	Not Found		0	0.808	69.36	9
High	Master Protein	G7ICB5	Uncharacterized protein OS=Medicago truncatula GN=MTR_1g018020 PE=4 SV=1	0	5.365	15.1163	1	1	1	1	86	9.4	9.72	Not Found	Not Found	Not Found	Not Found	Not Found	Not Found	High	Not Found		0	0.585	4.02	1
High	Master Protein	A0A072U3T1	Flavin-binding monooxygenase-like protein OS=Medicago truncatula GN=MTR_7g107710 PE=4 SV=1	0	30.503	15.1042	6	11	6	1	384	43.1	8.54	High	High	High	Not Found	Not Found	High	High	High		0	0.859	32	6
High	Master Protein	A0A072TUQ6	50S ribosomal L30-like protein OS=Medicago truncatula GN=MTR_8g099150 PE=3 SV=1	0	3.665	15.0943	1	1	1	1	106	12.2	10.59	High	Not Found	Not Found	Not Found	Not Found	Not Found	Not Found	Not Found		0	0.468	4.74	1
High	Master Protein	G7IKM6	Beta-amylase OS=Medicago truncatula GN=MTR_2g089030 PE=3 SV=2	0	31.232	15.0847	6	15	5	1	590	67.5	6.43	High	High	High	High	High	Not Found	High	Not Found		0	0.453	59.66	6
High	Master Protein	I3SNP1	Uncharacterized protein OS=Medicago truncatula GN=MTR_4g109650 PE=2 SV=1	0	14.753	15.0794	2	3	2	1	126	14.4	9.07	High	Not Found	High	Not Found	Not Found	Not Found	Not Found	Not Found		0	1.683	13.7	2
High	Master Protein	A0A072VF94	Nucleotide/sugar transporter family protein OS=Medicago truncatula GN=MTR_1g026590 PE=4 SV=1	0	30.255	15.0725	6	12	6	1	345	37.5	8.41	High	High	High	High	High	High	High	Not Found		0	1.154	45.38	6
High	Master Protein	G7K9T7	BZIP transcription factor OS=Medicago truncatula GN=MTR_5g038550 PE=4 SV=1	0	18.109	15.0641	3	3	3	1	312	33.9	8.92	Not Found	Not Found	Not Found	Not Found	High	High	Not Found	Not Found		0	0.468	13.79	3
High	Master Protein	A0A072U8Y9	Albumin-2 protein OS=Medicago truncatula GN=MTR_6g048620 PE=4 SV=1	0	7.641	15.0442	3	4	2	1	226	25.5	6.74	Not Found	Not Found	Not Found	High	Not Found	High	Not Found	Not Found		0	0.501	11.02	3
High	Master Protein	G7KWI2	Importin subunit alpha OS=Medicago truncatula GN=MTR_7g112350 PE=3 SV=2	0	45.553	15.0376	6	9	3	1	532	58.8	5.17	Not Found	Not Found	High	High	Not Found	High	Not Found	Not Found		0	0.848	40.93	6
High	Master Protein	A0A072TVP5	FTSH extracellular protease family protein OS=Medicago truncatula GN=MTR_8g099605 PE=4 SV=1	0	72.694	15.0327	13	23	13	1	918	103.5	8.5	High	High	High	High	High	High	High	High		0	0.748	93.05	13
High	Master Protein	I3SHA1	60S ribosomal protein L17A OS=Medicago truncatula GN=MTR_8g080460 PE=2 SV=1	0	22.314	15.0289	3	6	1	1	173	19.8	10.27	Not Found	Not Found	Not Found	Not Found	Not Found	Not Found	High	Not Found		0	1.848	23.71	3
High	Master Protein	A0A072UP32	Calcineurin B-like molecule protein OS=Medicago truncatula GN=MTR_4g099210 PE=4 SV=1	0	21.916	15.0235	4	6	4	1	213	24.5	4.88	Not Found	Not Found	Not Found	High	High	High	Not Found	Not Found		0	0.968	20.96	4
High	Master Protein	B7FH28	60S ribosomal L6-like protein OS=Medicago truncatula GN=MTR_3g094860 PE=2 SV=1	0	5.185	15.0215	4	5	2	1	233	25.9	10.2	Not Found	Not Found	Not Found	Medium	Not Found	Not Found	Medium	Not Found		0	0.501	7.93	4
High	Master Protein	G7IP27	Clathrin light chain OS=Medicago truncatula GN=MTR_2g013220 PE=3 SV=1	0	9.401	15.016	4	4	4	1	313	34.4	5.02	Not Found	Not Found	Not Found	High	High	Not Found	High	Not Found		0	0.931	12.81	4
High	Master Protein	A0A072TWB2	RAB GTPase-like protein A1D OS=Medicago truncatula GN=MTR_7g405790 PE=4 SV=1	0	8.462	15	3	4	1	1	220	24.4	5.22	Not Found	Not Found	High	High	High	Not Found	Not Found	Not Found		0	0.413	9.87	3
High	Master Protein	G7JC14	Nucleoporin complex subunit 54 OS=Medicago truncatula GN=MTR_3g085590 PE=4 SV=2	0	17.174	15	5	5	5	1	380	41.4	8	High	Not Found	Not Found	Not Found	Not Found	Not Found	High	Not Found		0	0.833	14.55	5
High	Master Protein	G7L8A8	Fluorescent IN BLUE LIGHT protein OS=Medicago truncatula GN=MTR_8g022040 PE=4 SV=1	0	13.605	15	3	4	3	1	300	33.4	8.7	Not Found	Not Found	High	High	High	Not Found	High	Not Found		0	0.389	14.9	3
High	Master Protein	I3T1W5	Uncharacterized protein OS=Medicago truncatula GN=MTR_1g063360 PE=2 SV=1	0	3.618	15	2	5	2	1	100	12.4	9.09	High	High	High	High	Not Found	Not Found	Not Found	Not Found		0	1.154	9.62	2
High	Master Protein	A0A072V507	Lactoylglutathione lyase OS=Medicago truncatula GN=MTR_2g023500 PE=3 SV=1	0	36.796	14.9826	4	13	3	1	287	32.1	5.59	Not Found	Not Found	Not Found	High	High	High	Not Found	Not Found	Deamidated [R251; Q252; Q280]	0	1.738	48.23	4
High	Master Protein	G7IM02	Phosphatidate cytidylyltransferase OS=Medicago truncatula GN=MTR_2g025550 PE=3 SV=1	0	47.983	14.9385	9	21	9	1	569	65.2	9.26	High	High	High	High	High	High	High	Not Found	Phospho [S167]; Deamidated [Q182]	1	1.848	70.52	9
High	Master Protein	G7K5M8	Pyruvate dehydrogenase E1 component subunit alpha OS=Medicago truncatula GN=MTR_5g036600 PE=4 SV=1	0	24.66	14.9367	5	12	5	1	395	43.4	7.94	Not Found	High	High	High	High	High	Not Found	Not Found		0	0.778	34.4	5
High	Master Protein	G7ZZ39	Chlorophyll a-b binding protein, chloroplastic OS=Medicago truncatula GN=MTR_8g023790 PE=3 SV=1	0	20.603	14.9254	2	6	2	1	268	28.8	6.9	High	High	Not Found	Not Found	Not Found	Not Found	Not Found	Not Found		0	2.162	26.44	2
High	Master Protein	G7ZZE4	3-ketoacyl-CoA synthase OS=Medicago truncatula GN=MTR_1g110930 PE=3 SV=1	0	30.76	14.9194	5	7	2	1	496	55.9	9.03	Not Found	Not Found	High	High	Not Found	High	Not Found	Not Found	Deamidated [Q402]	0	0.433	36.16	5
High	Master Protein	G7K9G8	Uncharacterized protein OS=Medicago truncatula GN=MTR_5g018590 PE=4 SV=1	0	14.133	14.9068	2	3	2	1	161	16.8	5.03	Not Found	Not Found	Not Found	Not Found	Not Found	Not Found	High	Not Found		0	0.995	12.37	2
High	Master Protein	G7L6U5	Auxin-binding protein ABP19a OS=Medicago truncatula GN=MTR_8g020590 PE=2 SV=1	0	14.983	14.9038	3	12	3	1	208	21.6	8.02	High	High	High	High	Not Found	Not Found	Not Found	Not Found		0	3.642	40.89	3
High	Master Protein	G7JKI1	Alkaline phytoceramidase OS=Medicago truncatula GN=MTR_4g133000 PE=4 SV=1	0	14.329	14.902	4	10	3	1	255	29.5	9.04	High	High	Medium	High	Not Found	Not Found	Not Found	Not Found		0	1.054	24.86	4
High	Master Protein	Q8GV74	Auxin efflux carrier component OS=Medicago truncatula GN=PIN4 PE=3 SV=1	0	33.391	14.9007	6	12	4	1	604	66.4	8.81	High	Not Found	High	High	High	High	High	Not Found		0	0.401	46.39	6
High	Master Protein	G7LBU3	Malic enzyme OS=Medicago truncatula GN=MTR_8g032040 PE=3 SV=1	0	46.622	14.9007	8	17	6	1	604	66.6	6.76	High	Not Found	High	High	High	High	High	Not Found		0	0.884	57.32	8
High	Master Protein	B7FHB0	ATP synthase G subunit family protein OS=Medicago truncatula GN=MTR_8g101880 PE=2 SV=1	0	5.832	14.876	2	2	2	1	121	14	8.73	Not Found	Not Found	Not Found	Not Found	Not Found	High	High	Not Found		0	0.52	5.36	2
High	Master Protein	A0A072TU77	Peptidase M1 family aminopeptidase N OS=Medicago truncatula GN=MTR_8g098525 PE=4 SV=1	0	56.104	14.8718	15	20	15	1	975	109.6	6.61	High	High	High	High	High	High	High	Not Found		0	0.843	68.99	15
High	Master Protein	B7FF81	Ubiquitin-conjugating enzyme OS=Medicago truncatula GN=MTR_1g058100 PE=2 SV=1	0	8.983	14.8649	2	4	2	1	148	16.8	6.68	Not Found	Not Found	High	High	High	Not Found	Not Found	Not Found		0	0.874	12.04	2
High	Master Protein	G7KV13	CASP-like protein OS=Medicago truncatula GN=MTR_7g071110 PE=3 SV=1	0	3.579	14.8515	2	5	2	1	202	22.1	8.15	Not Found	Not Found	High	High	High	High	Not Found	Not Found		0	0.468	20.01	2
High	Master Protein	G7LC88	Alpha/beta hydrolase family protein OS=Medicago truncatula GN=MTR_8g092560 PE=4 SV=1	0	6.545	14.8472	3	3	3	1	229	24.5	9.03	Not Found	High	Not Found	High	Medium	Not Found	Not Found	Not Found	Deamidated [R87]; Phospho [T85; T91]	2	0.874	9.3	3
High	Master Protein	G7JNH3	Alanine--tRNA ligase OS=Medicago truncatula GN=MTR_4g074640 PE=3 SV=1	0	43.554	14.8421	11	11	11	1	950	104.5	6.07	Not Found	High	High	High	High	High	High	Not Found		0	0.548	39.16	11
High	Master Protein	G7IRF6	50S ribosomal protein L14 OS=Medicago truncatula GN=MTR_2g087550 PE=3 SV=1	0	18.008	14.8325	2	5	1	1	209	23	9.89	Not Found	Not Found	Not Found	High	High	Not Found	Not Found	Not Found		0	0.585	18.84	2
High	Master Protein	G7J7R2	Dehydrin OS=Medicago truncatula GN=MTR_3g117290 PE=2 SV=1	0	18.606	14.8325	2	3	2	1	209	23.5	5.8	High	Not Found	Not Found	Not Found	Not Found	Not Found	High	Not Found		0	0.701	17.18	2
High	Master Protein	A0A072TKC7	Patatin OS=Medicago truncatula GN=MTR_8g007040 PE=3 SV=1	0	43.666	14.8235	7	21	7	1	425	46.9	5.3	High	High	High	High	High	High	High	Not Found		0	1.565	75.33	7
High	Master Protein	G7IT31	ABC transporter D family protein OS=Medicago truncatula GN=MTR_2g062790 PE=4 SV=2	0	57.693	14.7849	8	16	8	1	744	83.7	5.77	High	High	High	High	High	High	Not Found	Not Found	Deamidated [Q460]	0	0.855	64.54	8
High	Master Protein	A0A072VA30	Calcium-dependent lipid-binding domain protein OS=Medicago truncatula GN=MTR_2g072180 PE=4 SV=1	0	50.719	14.7757	10	14	10	1	758	85.5	7.15	Not Found	High	High	Not Found	High	High	High	Not Found	Phospho [S559]	1	0.798	49.42	10
High	Master Protein	G7ITF9	RAB GTPase-like protein A1D OS=Medicago truncatula GN=MTR_2g075950 PE=2 SV=1	0	13.402	14.7465	3	8	1	1	217	24	6.37	High	High	High	High	High	Not Found	High	Not Found		0	0.501	29.26	3
High	Master Protein	G7JT48	Phosphoribulokinase/uridine kinase-like protein OS=Medicago truncatula GN=MTR_4g112790 PE=4 SV=2	0	37.152	14.7368	9	13	9	1	665	74.4	6.98	Not Found	High	High	High	High	High	High	Not Found		0	0.616	43.77	9
High	Master Protein	G7IJU0	Peroxidase OS=Medicago truncatula GN=MTR_2g029800 PE=3 SV=1	0	25.667	14.7309	5	13	1	1	353	38	7.58	High	High	High	High	High	Not Found	Not Found	Not Found		0	0.896	42.49	5
High	Master Protein	A0A072TYP7	Peptidylprolyl isomerase OS=Medicago truncatula GN=MTR_7g053470 PE=4 SV=1	0	30.07	14.7059	5	6	5	1	544	61.3	5.16	Not Found	High	High	High	Medium	Not Found	High	Not Found		0	0.616	33.16	5
High	Master Protein	G7JCT7	Casein kinase OS=Medicago truncatula GN=MTR_4g095400 PE=3 SV=1	0	21.618	14.6907	4	7	3	1	388	45.3	8.68	Not Found	Medium	High	High	Not Found	Not Found	Not Found	Not Found		0	0.557	25.08	4
High	Master Protein	G7L0R8	Esterase/lipase/thioesterase-like protein OS=Medicago truncatula GN=MTR_7g114340 PE=4 SV=2	0	25.468	14.6853	10	12	10	1	715	79.9	6.73	Not Found	High	High	High	High	Medium	Not Found	Not Found		0	0.65	39.22	10
High	Master Protein	G7KGV6	Mannose-1-phosphate guanylyltransferase-like protein OS=Medicago truncatula GN=MTR_5g080770 PE=4 SV=1	0	17.647	14.6814	5	6	5	1	361	39.5	6.87	Not Found	Not Found	High	Not Found	High	Medium	Not Found	Not Found		0	0.823	17.68	5
High	Master Protein	A0A072TCE5	Rab GTPase-like protein G3A (Fragment) OS=Medicago truncatula GN=MTR_1663s0010 PE=4 SV=1	0	4.528	14.6667	1	3	1	1	75	8.2	5.4	Not Found	Not Found	Not Found	High	High	High	Not Found	Not Found		0	0.468	11	1
High	Master Protein	G7ILT6	Transmembrane-like protein OS=Medicago truncatula GN=MTR_2g017920 PE=2 SV=1	0	6.676	14.6552	1	1	1	1	116	13.3	9.31	Not Found	Not Found	Not Found	Not Found	Not Found	High	Not Found	Not Found		0	0.468	3.54	1
High	Master Protein	G7JCK0	Ketol-acid reductoisomerase OS=Medicago truncatula GN=MTR_4g079780 PE=3 SV=1	0	25.534	14.6552	7	9	7	1	580	62.9	6.76	Not Found	High	Medium	High	High	High	Not Found	Not Found		0	0.808	29.99	7
High	Master Protein	G7JA88	ABC transporter-like protein OS=Medicago truncatula GN=MTR_3g094740 PE=4 SV=2	0	46.807	14.6505	11	22	5	1	744	83.7	8.85	Not Found	Not Found	High	High	High	Not Found	High	Not Found	Deamidated [R520]	0	0.986	81.89	11
High	Master Protein	G7JAD9	DNA-binding protein alba protein OS=Medicago truncatula GN=MTR_3g095250 PE=4 SV=2	0	13.492	14.6444	5	13	1	1	239	26.4	10.01	Not Found	Not Found	Not Found	Not Found	Not Found	Not Found	High	Not Found		0	2.162	35.65	5
High	Master Protein	A0A072VBL2	Transmembrane protein, putative OS=Medicago truncatula GN=MTR_2g080290 PE=4 SV=1	0	26.72	14.6444	3	11	3	1	239	26.2	7.61	High	High	High	Not Found	Not Found	High	High	Not Found		0	1.031	49.99	3
High	Master Protein	G7KYE4	Major intrinsic protein (MIP) family transporter OS=Medicago truncatula GN=MTR_7g085070 PE=3 SV=1	0	14.009	14.6341	4	14	4	1	246	26.6	9.01	High	High	High	High	High	Not Found	Not Found	Not Found		0	1.276	40.7	4
High	Master Protein	I3SJY8	Ribosomal protein S8 OS=Medicago truncatula GN=MTR_1g105415 PE=2 SV=1	0	10.695	14.6154	3	10	3	1	130	14.8	9.89	High	High	High	High	High	Not Found	Not Found	Not Found		0	1.512	27.21	3
High	Master Protein	A0A072UPD2	Beta-hydroxyacyl-ACP dehydratase OS=Medicago truncatula GN=MTR_4g094265 PE=3 SV=1	0	11.544	14.6119	3	6	3	1	219	24.1	9.17	High	High	High	High	Not Found	Not Found	Not Found	Not Found		0	0.54	16.83	3
High	Master Protein	G7I885	Aspartate-tRNA ligase OS=Medicago truncatula GN=MTR_1g014140 PE=4 SV=1	0	41.169	14.6026	9	9	9	1	541	60.5	6.4	Medium	Not Found	Not Found	High	High	High	High	Not Found		0	0.679	33.95	9
High	Master Protein	A0A072VH72	Aminoacylase OS=Medicago truncatula GN=MTR_1g038920 PE=3 SV=1	0	21.988	14.6018	7	7	4	1	452	50.5	6.55	Not Found	Not Found	Not Found	Not Found	Medium	Not Found	High	Not Found		0	0.711	18.1	7
High	Master Protein	A2Q5C4	Methyltransferase PMT16, putative OS=Medicago truncatula GN=MTR_7g076150 PE=4 SV=1	0	31.461	14.601	6	9	5	1	589	66.7	8.82	High	High	High	Not Found	Not Found	Not Found	Not Found	Not Found	Deamidated [R198]	0	0.604	34.29	6
High	Master Protein	B7FMQ2	Peptidyl-prolyl cis-trans isomerase OS=Medicago truncatula GN=MTR_3g037570 PE=2 SV=1	0	8.799	14.5833	1	1	1	1	144	15.2	9.41	High	Not Found	Not Found	Not Found	Not Found	Not Found	Not Found	Not Found		0	0.259	5.74	1
High	Master Protein	A0A072UTB1	Golgi SNAP receptor complex member 1 OS=Medicago truncatula GN=MTR_4g025850 PE=3 SV=1	0	14.903	14.5833	2	3	2	1	240	26.7	9.51	Not Found	Not Found	Not Found	High	High	Not Found	Not Found	Not Found		0	0.334	15.21	2
High	Master Protein	A0A072VYH6	Fungal proteinase A, aspartic proteinase superfamily protein OS=Medicago truncatula GN=MTR_1g484940 PE=3 SV=1	0	40.487	14.5669	7	20	7	1	508	55.6	5.8	High	High	High	High	High	High	Not Found	Not Found	Deamidated [Q221; Q260]	0	1.291	88.59	7
High	Master Protein	G7KY55	Transmembrane protein, putative OS=Medicago truncatula GN=MTR_7g073280 PE=4 SV=1	0	6.546	14.5604	3	4	3	1	364	39.7	5.52	Not Found	Not Found	Not Found	High	Not Found	Medium	Medium	Medium		0	0.389	10.67	3
High	Master Protein	I3SL92	Transmembrane protein, putative OS=Medicago truncatula GN=MTR_1g054455 PE=2 SV=1	0	6.366	14.557	1	1	1	1	158	17.1	9.33	Not Found	Not Found	High	Not Found	Not Found	Not Found	Not Found	Not Found		0	0.292	4.99	1
High	Master Protein	A0A072THI5	Ubiquinone biosynthesis protein UbiB OS=Medicago truncatula GN=MTR_0053s0030 PE=4 SV=1	0	41.414	14.5506	10	15	7	1	701	78.1	6	High	High	High	High	High	High	High	Not Found	Deamidated [R610]	0	0.874	44.28	10
High	Master Protein	I3T234	Import inner membrane translocase subunit TIM14 OS=Medicago truncatula GN=MTR_7g117745 PE=2 SV=1	0	6.945	14.5455	1	2	1	1	110	11.7	10.11	Not Found	Not Found	Not Found	High	High	Not Found	Not Found	Not Found		0	0.334	10.68	1
High	Master Protein	A0A072THF6	NADH dehydrogenase [ubiquinone] iron-sulfur protein OS=Medicago truncatula GN=MTR_0212s0080 PE=3 SV=1	0	28.749	14.5455	4	15	4	1	220	26.5	8.38	High	High	High	High	High	Not Found	Not Found	Medium		0	1.581	52.69	4
High	Master Protein	G7IS30	Lipoxygenase OS=Medicago truncatula GN=MTR_2g099570 PE=3 SV=1	0	43.233	14.518	12	19	7	1	861	97.3	6.54	High	High	Not Found	Not Found	Not Found	High	High	Not Found		0	0.628	52.52	12
High	Master Protein	G7JS81	Ubiquinone biosynthesis protein COQ9 OS=Medicago truncatula GN=MTR_4g125000 PE=4 SV=2	0	18.454	14.5161	3	5	3	1	310	34.7	6.44	Not Found	High	High	High	Not Found	Not Found	Not Found	Not Found		0	0.468	18.79	3
High	Master Protein	G8A1U1	LysM domain GPI-anchored protein OS=Medicago truncatula GN=MTR_4g094730 PE=4 SV=1	0	13.326	14.5161	6	16	6	1	372	40	7.81	High	Medium	High	High	High	High	High	Not Found		0	1.228	37.8	6
High	Master Protein	A0A072UJ52	Plant/T7A14-6 protein OS=Medicago truncatula GN=MTR_4g050050 PE=4 SV=1	0	8.751	14.5078	3	4	3	1	193	21	7.87	Not Found	High	High	Not Found	High	High	Not Found	Not Found		0	0.874	11.62	3
High	Master Protein	G7K2J4	Porin/voltage-dependent anion-selective channel protein OS=Medicago truncatula GN=MTR_5g015580 PE=2 SV=1	0	11.512	14.4928	4	8	3	1	276	29.5	9.41	High	High	High	Not Found	Not Found	Not Found	Not Found	Not Found		0	0.585	22.8	4
High	Master Protein	G7IB00	UDP-galactose transporter OS=Medicago truncatula GN=MTR_1g116565 PE=4 SV=2	0	27.067	14.4608	5	11	5	1	408	45.3	9.55	High	High	High	Not Found	High	Not Found	High	Not Found	Deamidated [R360; Q363]	0	0.61	40.58	5
High	Master Protein	G7IAZ0	Callose synthase-like protein OS=Medicago truncatula GN=MTR_1g116470 PE=4 SV=2	0	124.459	14.4585	27	59	21	1	1902	219.2	8.68	High	High	High	High	High	High	High	Not Found		0	0.778	220.31	27
High	Master Protein	A0A072V558	4-hydroxy-4-methyl-2-oxoglutarate aldolase OS=Medicago truncatula GN=MTR_2g010815 PE=3 SV=1	0	6.995	14.4578	2	2	1	1	166	17.8	5.82	Not Found	Not Found	Not Found	High	Not Found	Not Found	Not Found	Not Found		0	0.425	7.14	2
High	Master Protein	G8A0S6	Fructose-1,6-bisphosphatase, cytosolic-like protein OS=Medicago truncatula GN=MTR_6g035305 PE=3 SV=1	0	17.223	14.4543	4	7	3	1	339	37	5.88	Not Found	Not Found	High	High	High	High	High	Not Found		0	0.52	22.61	4
High	Master Protein	Q1SMZ8	Peptidylprolyl isomerase OS=Medicago truncatula GN=MTR_8g107010 PE=4 SV=1	0	34.55	14.4531	4	11	4	1	256	27.5	6.6	High	High	Not Found	High	High	High	Not Found	Not Found		0	1.254	48.82	4
High	Master Protein	B7FH72	NADH-ubiquinone reductase complex 1 MLRQ subunit OS=Medicago truncatula GN=MTR_3g078590 PE=2 SV=1	0.002	2.537	14.4444	1	1	1	1	90	10.1	9.5	Not Found	Not Found	Not Found	Not Found	High	Not Found	Not Found	Not Found		0	0.585	3.23	1
High	Master Protein	G7IYJ3	Plant invertase/pectin methylesterase inhibitor OS=Medicago truncatula GN=MTR_3g008840 PE=2 SV=1	0	10.303	14.4385	2	7	1	1	187	20.6	8.44	High	Not Found	Not Found	Not Found	Not Found	Not Found	Not Found	Not Found		0	1.512	22.42	2
High	Master Protein	A0A072VKG9	S-adenosylmethionine-dependent methyltransferase, putative OS=Medicago truncatula GN=MTR_1g069785 PE=4 SV=1	0	29.411	14.4295	8	11	6	1	596	68	8.51	High	Not Found	High	High	Not Found	High	High	Not Found		0	0.658	36.13	8
High	Master Protein	G7LA51	Methyltransferase PMT2-like protein OS=Medicago truncatula GN=MTR_8g055840 PE=4 SV=1	0	53.109	14.4262	9	21	5	1	610	69	7.2	High	High	High	High	High	High	High	Not Found		0	1.04	78.35	9
High	Master Protein	G7IU15	DUF1230 family protein OS=Medicago truncatula GN=MTR_5g016100 PE=2 SV=1	0	14.963	14.4231	2	7	2	1	312	34.4	9.01	Not Found	Not Found	High	High	High	Not Found	Not Found	Not Found	Deamidated [Q75; R76]	0	0.274	20.93	2
High	Master Protein	G7JIY6	NADH dehydrogenase [ubiquinone] 1 beta subcomplex subunit 8 OS=Medicago truncatula GN=MTR_4g101140 PE=2 SV=1	0	11.902	14.4	2	14	2	1	125	13.4	7.88	High	High	High	High	High	Not Found	Not Found	Not Found		0	1.512	34.61	2
High	Master Protein	A0A072UFK8	Hexosyltransferase OS=Medicago truncatula GN=MTR_7g115460 PE=3 SV=1	0	37.878	14.3898	7	15	7	1	549	62.2	8.51	High	High	High	High	High	High	High	Not Found		0	0.911	60.52	7
High	Master Protein	G7I4W4	AGC kinase OS=Medicago truncatula GN=MTR_1g075880 PE=4 SV=1	0	30.914	14.3657	5	7	2	1	536	62.2	8.34	Not Found	Not Found	Not Found	Not Found	Not Found	High	High	Not Found	Phospho [S315; T316]	2	0.501	22.47	5
High	Master Protein	G7KPN3	Glutamate dehydrogenase OS=Medicago truncatula GN=MTR_6g029460 PE=3 SV=1	0	22.24	14.3552	6	17	1	1	411	44.5	6.8	High	High	High	High	High	High	Not Found	Not Found		0	0.978	47.64	6
High	Master Protein	G7L895	Like-COV protein OS=Medicago truncatula GN=MTR_8g103420 PE=4 SV=1	0	15.245	14.3396	2	3	2	1	265	29.4	7.11	Not Found	Not Found	Not Found	High	Not Found	High	Not Found	Not Found		0	0.778	12.31	2
High	Master Protein	A0A072UUM0	All-trans-retinol 13,14-reductase OS=Medicago truncatula GN=MTR_4g134780 PE=4 SV=1	0	31.384	14.3351	7	15	7	1	579	63.1	7.06	High	High	High	High	High	Not Found	Not Found	Not Found		0	0.812	44.38	7
High	Master Protein	G7K5K1	Matrixin family protein OS=Medicago truncatula GN=MTR_5g036290 PE=3 SV=1	0	24.145	14.3243	5	9	5	1	370	41.8	5.95	High	High	High	High	Not Found	High	Not Found	Not Found		0	0.585	33.8	5
High	Master Protein	G7JKQ6	Dynamin-2B-like protein OS=Medicago truncatula GN=MTR_4g030140 PE=3 SV=1	0	57.384	14.3167	11	14	11	1	922	100.1	9.11	High	High	High	High	Not Found	High	High	Not Found		0	0.54	52.02	11
High	Master Protein	G7K1J8	3-ketoacyl-CoA synthase OS=Medicago truncatula GN=MTR_5g056510 PE=3 SV=1	0	20.431	14.3145	5	5	2	1	496	56.4	9.09	Not Found	High	Not Found	Not Found	Not Found	High	Not Found	Not Found	Deamidated [Q402]	0	0.346	18.09	5
High	Master Protein	A0A072U8C1	Potassium transporter OS=Medicago truncatula GN=MTR_6g033165 PE=3 SV=1	0	72.756	14.2857	9	17	9	1	819	91.5	8.57	High	High	Not Found	High	High	High	High	Not Found		0	0.695	85.78	9
High	Master Protein	G7JQA3	50S ribosomal protein L20 OS=Medicago truncatula GN=rpl20 PE=2 SV=2	0.001	3.396	14.2857	2	2	2	1	119	14	11.53	High	Not Found	Not Found	Not Found	Not Found	Not Found	Not Found	Not Found		0	0.585	3.85	2
High	Master Protein	A0A072UQU5	Endo-1,3-1,4-beta-D-glucanase-like protein OS=Medicago truncatula GN=MTR_4g117380 PE=4 SV=1	0	14.949	14.2857	2	2	2	1	238	25.6	5.83	Not Found	High	High	Not Found	Not Found	Not Found	Not Found	Not Found		0	0.334	10.24	2
Low	Master Protein	A0A072TM97	Uncharacterized protein OS=Medicago truncatula GN=MTR_8g027510 PE=4 SV=1	0.182	0.355	14.2857	1	1	1	1	70	7.9	7.18	Not Found	Not Found	Not Found	Medium	Not Found	Not Found	Not Found	Not Found		0	0.389	0	1
High	Master Protein	G8A2L4	Rhodanese/cell cycle control phosphatase superfamily protein OS=Medicago truncatula GN=MTR_4g015860 PE=4 SV=1	0	18.543	14.2857	3	8	3	1	224	25.1	9.55	Not Found	High	High	High	High	Not Found	Not Found	Not Found	Deamidated [R81]	0	1.276	27.61	3
High	Master Protein	G7L9H2	NAD-dependent isocitrate dehydrogenase OS=Medicago truncatula GN=MTR_8g074030 PE=4 SV=1	0	15.386	14.2857	6	9	5	1	371	40.2	6.79	High	High	High	High	High	Not Found	Not Found	Not Found		0	0.823	26.98	6
High	Master Protein	A0A072V3N8	T-complex protein 1 subunit delta OS=Medicago truncatula GN=MTR_3g109925 PE=3 SV=1	0	21.035	14.2857	6	6	6	1	532	57.4	7.93	High	Not Found	Not Found	Not Found	High	High	High	Not Found		0	0.484	21.2	6
High	Master Protein	A0A072UNS2	Allyl alcohol dehydrogenase-like protein OS=Medicago truncatula GN=MTR_5g013975 PE=4 SV=1	0	13.615	14.2857	1	2	1	1	105	11.2	7.96	Not Found	Not Found	High	Not Found	Not Found	Not Found	Not Found	Not Found		0	0.778	8.87	1
High	Master Protein	A0A072UTY2	Transmembrane protein, putative OS=Medicago truncatula GN=MTR_4g033475 PE=4 SV=1	0	12.185	14.2857	4	4	4	1	245	28.2	9.88	High	Not Found	Not Found	Not Found	Not Found	High	Not Found	Not Found		0	0.624	11.14	4
High	Master Protein	G7I9F7	Importin subunit alpha OS=Medicago truncatula GN=MTR_1g083810 PE=3 SV=1	0	36.14	14.2589	6	8	3	1	533	59	5.31	Not Found	Not Found	Not Found	High	Not Found	High	High	Not Found		0	0.743	34.47	6
High	Master Protein	G7K9K1	26S proteasome non-ATPase regulatory subunit-like protein OS=Medicago truncatula GN=MTR_5g027960 PE=4 SV=1	0	26.657	14.2487	6	17	6	1	386	44.1	5.39	High	High	High	High	High	High	Not Found	Not Found		0	1.031	53.22	6
High	Master Protein	G7L1T5	O-linked GlcNAc transferase-like protein OS=Medicago truncatula GN=MTR_7g114810 PE=4 SV=1	0	21.49	14.2384	4	7	4	1	302	33.8	8.34	Not Found	Not Found	High	High	High	Not Found	Not Found	Not Found		0	0.778	33.69	4
High	Master Protein	G7JJ86	Lactoylglutathione lyase-like protein OS=Medicago truncatula GN=MTR_4g132260 PE=4 SV=1	0	8.754	14.2349	4	4	1	1	281	31.4	5.11	Not Found	Not Found	Not Found	Not Found	Not Found	High	Not Found	Not Found		0	0.719	11.16	4
High	Master Protein	G7I3Y0	p-loop nucleoside triphosphate hydrolase superfamily protein OS=Medicago truncatula GN=MTR_1g075200 PE=4 SV=1	0	30.463	14.2308	5	8	5	1	520	58.2	7.94	High	High	High	High	High	Not Found	High	Not Found		0	0.468	39.79	5
Low	Master Protein	A0A072UL60	Transmembrane protein, putative OS=Medicago truncatula GN=MTR_4g063825 PE=4 SV=1	0.134	0.541	14.1935	1	1	1	1	155	17.8	9.67	Medium	Not Found	Not Found	Not Found	Not Found	Not Found	Not Found	Not Found		0	0.233	3.57	1
High	Master Protein	A0A072U1H6	Alpha-galactosidase OS=Medicago truncatula GN=MTR_7g073640 PE=3 SV=1	0	13.548	14.1809	6	11	1	1	409	45.6	8.38	Not Found	Medium	Not Found	Not Found	Not Found	Not Found	Not Found	Not Found		0	0.585	23.26	6
High	Master Protein	G7LIM7	Chlorophyllide A oxygenase OS=Medicago truncatula GN=MTR_8g085840 PE=4 SV=1	0	53.011	14.1777	6	20	5	1	529	60.1	7.97	Not Found	High	High	High	High	High	High	Not Found	Deamidated [Q290]	0	0.84	91.31	6
High	Master Protein	A0A072UM27	Polyol/monosaccharide transporter 1 OS=Medicago truncatula GN=MTR_4g069500 PE=3 SV=1	0	15.046	14.1762	6	8	5	1	522	56.4	9.41	High	High	High	High	Not Found	High	Not Found	Not Found		0	0.585	26.57	6
High	Master Protein	G7JRM8	DUF3411 domain protein OS=Medicago truncatula GN=MTR_4g077000 PE=4 SV=1	0	29.752	14.1753	5	14	3	1	388	41.5	7.3	High	High	High	High	High	Not Found	Not Found	Not Found		0	0.905	43.8	5
High	Master Protein	G7L571	UDP-glucose 6-dehydrogenase OS=Medicago truncatula GN=MTR_7g012950 PE=3 SV=1	0	25.207	14.1667	5	9	5	1	480	52.9	5.99	High	High	Medium	High	High	Not Found	Not Found	Not Found		0	0.438	36.19	5
High	Master Protein	A0A072U553	Calcium-dependent phospholipid-binding copine family protein OS=Medicago truncatula GN=MTR_8g096190 PE=4 SV=1	0	37.119	14.1623	6	11	6	1	579	63.6	5.44	High	High	High	High	High	Not Found	High	Not Found	Deamidated [R358]	0	0.911	41.3	6
High	Master Protein	A2Q5A8	Aldo/keto reductase OS=Medicago truncatula GN=MTR_7g021680 PE=2 SV=1	0	14.399	14.1593	5	5	5	1	339	37.4	6.14	Not Found	Not Found	Not Found	Not Found	High	High	Not Found	Not Found		0	0.616	15.52	5
High	Master Protein	G7JFB5	EF hand calcium-binding family protein OS=Medicago truncatula GN=MTR_4g115170 PE=4 SV=1	0	21.596	14.1593	4	5	4	1	226	25.2	4.56	Not Found	Not Found	Not Found	Not Found	Not Found	High	High	Not Found		0	0.848	23.7	4
High	Master Protein	Q2HTW4	Protein kinase OS=Medicago truncatula GN=MTR_5g038870 PE=3 SV=1	0	13.565	14.1463	6	10	2	1	410	45	9.72	Not Found	Not Found	High	Not Found	Not Found	Not Found	High	Not Found		0	0.562	22.3	6
High	Master Protein	B7FN77	50S ribosomal protein L22 OS=Medicago truncatula GN=MTR_7g100410 PE=2 SV=1	0.001	3.049	14.1414	3	8	3	1	198	21.5	10.05	High	High	Medium	Medium	Not Found	Medium	High	Not Found		0	0.585	18.13	3
High	Master Protein	B7FLF5	Alanine-glyoxylate aminotransferase-like protein OS=Medicago truncatula GN=MTR_8g091660 PE=2 SV=1	0	16.221	14.1372	6	8	6	1	481	52.2	7.46	High	High	High	Not Found	High	High	Not Found	Not Found		0	0.682	23.07	6
High	Master Protein	B3GN62	EIN2-like protein, nramp transporter OS=Medicago truncatula GN=Skl1 PE=2 SV=1	0	79.819	14.1329	13	20	13	1	1309	142.2	5.9	High	High	High	High	High	High	High	High		0	0.674	79.13	13
High	Master Protein	A0A072TFV7	50S ribosomal protein L6 OS=Medicago truncatula GN=MTR_0316s0010 PE=3 SV=1	0	10.824	14.1104	3	6	3	1	163	18.3	9.72	Not Found	High	High	High	Not Found	High	Not Found	Not Found		0	0.778	23.54	3
High	Master Protein	A0A072TNQ8	Cytochrome P450 family 71 protein (Fragment) OS=Medicago truncatula GN=MTR_1750s0010 PE=3 SV=1	0	6.13	14.1026	2	4	1	1	156	17.5	5.55	Not Found	Not Found	Not Found	Not Found	Not Found	Medium	High	Not Found		0	0.995	11.75	2
High	Master Protein	G7KIE5	Ran-binding protein 2, Ran-binding domain protein OS=Medicago truncatula GN=MTR_6g042530 PE=4 SV=1	0	11.943	14.0909	2	2	2	1	220	24.8	5.11	Not Found	Not Found	Not Found	High	Not Found	High	Not Found	Not Found		0	0.52	9.22	2
High	Master Protein	G7KVQ4	Polygalacturonase-inhibiting protein, putative OS=Medicago truncatula GN=MTR_7g023590 PE=4 SV=1	0	10.061	14.0909	3	8	3	1	220	24	8.75	High	High	High	High	High	Not Found	Not Found	Not Found		0	0.701	26.61	3
High	Master Protein	A0A072TTY6	Acyl-coenzyme A oxidase OS=Medicago truncatula GN=MTR_8g090375 PE=3 SV=1	0	44.342	14.0784	8	14	8	1	689	77.3	8.5	High	High	Not Found	High	High	Not Found	Not Found	Not Found		0	0.756	57.33	8
High	Master Protein	G7LBX9	Protein transporter Sec61 subunit alpha-like protein OS=Medicago truncatula GN=MTR_8g058330 PE=3 SV=1	0	22.479	14.0756	7	17	7	1	476	52.2	9	High	High	High	High	High	Not Found	Medium	Not Found		0	1.154	55.94	7
High	Master Protein	G7IR51	Plant/MXC17-8 protein OS=Medicago truncatula GN=MTR_2g081000 PE=4 SV=1	0	24.184	14.0684	6	11	6	1	526	57.5	9.1	High	High	High	Not Found	High	Medium	High	Not Found		0	0.54	23.71	6
High	Master Protein	I3T2Q3	60S ribosomal L35-like protein OS=Medicago truncatula GN=MTR_1g115545 PE=2 SV=1	0	6.161	14.0496	2	4	1	1	121	14.1	10.8	Not Found	Not Found	Not Found	Not Found	High	Not Found	Not Found	Not Found		0	1.683	8.25	2
High	Master Protein	G7LG18	Prefoldin OS=Medicago truncatula GN=MTR_8g039140 PE=4 SV=1	0	3.972	14.0496	2	2	2	1	121	14.1	8.78	Not Found	Not Found	Not Found	Not Found	Not Found	High	Not Found	Not Found		0	0.334	4.99	2
High	Master Protein	G7J5Z3	Outer envelope pore protein OS=Medicago truncatula GN=MTR_3g115990 PE=2 SV=1	0	10.85	14.0449	2	2	2	1	178	20.8	9.51	Not Found	High	High	Not Found	Not Found	Not Found	Not Found	Not Found		0	0.468	7.84	2
High	Master Protein	A0A072UDX0	Chaperone protein dnaJ, putative OS=Medicago truncatula GN=MTR_5g004600 PE=4 SV=1	0	9.275	14.0449	2	3	2	1	178	19.6	7.49	Not Found	Not Found	High	High	Not Found	Not Found	Not Found	High		0	0.468	10.52	2
High	Master Protein	A0A072TTN0	Electron transport SCO1/SenC family protein, putative OS=Medicago truncatula GN=MTR_8g090295 PE=4 SV=1	0	16.219	14.0221	4	4	4	1	271	30.6	9.17	High	Not Found	Not Found	Not Found	Not Found	High	High	Not Found		0	0.778	14.18	4
High	Master Protein	A0A072UFQ2	Vacuolar H+-translocating inorganic pyrophosphatase OS=Medicago truncatula GN=MTR_4g005280 PE=3 SV=1	0	49.512	14.0175	10	32	9	1	799	84.9	5.72	High	High	High	High	High	High	High	Not Found		0	0.758	114.23	10
High	Master Protein	G7K2L1	Plant intracellular ras group-related LRR protein OS=Medicago truncatula GN=MTR_5g024780 PE=4 SV=1	0	28.646	14.0171	8	18	7	1	585	64.5	6.33	High	Not Found	Not Found	High	High	High	High	Not Found		0	0.679	56.1	8
High	Master Protein	G7K0L3	Peroxisomal acetoacetyl-coenzyme A thiolase OS=Medicago truncatula GN=MTR_5g098310 PE=3 SV=1	0	16.741	14.0049	5	11	4	1	407	41.6	6.57	High	High	High	High	Not Found	High	High	Not Found		0	0.532	37.2	5
High	Master Protein	A0A072VNF5	Dihydrolipoamide acetyltransferase component of pyruvate dehydrogenase complex OS=Medicago truncatula GN=MTR_1g096240 PE=3 SV=1	0	18.54	14.0044	5	12	4	1	457	48.2	8.02	High	High	High	High	Medium	Not Found	Not Found	Not Found		0	0.585	39.76	5
High	Master Protein	G7K0Y0	SWIB/MDM2 domain protein OS=Medicago truncatula GN=MTR_5g005200 PE=2 SV=1	0	5.427	13.986	2	3	2	1	143	15.7	10.23	High	High	Not Found	Not Found	Not Found	Not Found	Not Found	Not Found		0	0.931	7.49	2
High	Master Protein	G7K0Q1	Transmembrane 9 superfamily member OS=Medicago truncatula GN=MTR_5g098730 PE=3 SV=2	0	19.413	13.985	10	21	3	1	665	75.5	6.62	Not Found	Not Found	Not Found	High	High	Medium	Not Found	Not Found		0	0.983	53.22	10
High	Master Protein	A0A072UT21	Metal-dependent protein hydrolase OS=Medicago truncatula GN=MTR_4g021175 PE=4 SV=1	0	21.101	13.9842	3	4	3	1	379	43.2	7.68	Not Found	Not Found	Not Found	High	High	High	High	Not Found		0	0.269	20.23	3
High	Master Protein	A0A072UQF6	Receptor-like kinase plant OS=Medicago truncatula GN=MTR_4g099130 PE=3 SV=1	0	17.913	13.9842	6	13	4	1	379	42.9	9.42	High	Not Found	Not Found	High	High	High	Not Found	Not Found		0	0.859	27.29	6
High	Master Protein	I3SBU8	Import inner membrane translocase protein OS=Medicago truncatula GN=MTR_4g063925 PE=2 SV=1	0.001	3.216	13.9785	1	1	1	1	93	11	7.3	Not Found	Not Found	Not Found	Not Found	Not Found	High	Not Found	Not Found		0	0.468	4.22	1
High	Master Protein	A0A072W0C8	ATP sulfurylase OS=Medicago truncatula GN=MTR_1g102550 PE=4 SV=1	0	16.696	13.9785	5	6	4	1	465	52	7.8	High	High	Not Found	Not Found	Not Found	High	Not Found	Not Found		0	0.389	17.39	5
High	Master Protein	B7FMN3	Trafficking protein particle complex subunit-like protein OS=Medicago truncatula GN=MTR_4g081170 PE=2 SV=1	0	12.145	13.9785	2	3	2	1	186	20.9	4.46	High	Not Found	Not Found	Not Found	High	High	Not Found	Not Found		0	0.585	11.11	2
High	Master Protein	A0A072UPN1	Triose phosphate/phosphate translocator OS=Medicago truncatula GN=MTR_4g088350 PE=4 SV=1	0	24.05	13.9651	5	10	5	1	401	43.5	9.55	High	High	High	High	Not Found	High	Not Found	Not Found		0	1.154	37.76	5
High	Master Protein	G7LDL9	Transmembrane protein, putative OS=Medicago truncatula GN=MTR_8g036520 PE=2 SV=1	0	26.442	13.9535	4	18	4	1	258	28.9	9.79	High	High	High	High	High	High	High	Not Found		0	1.276	53.34	4
High	Master Protein	A0A072UXW2	Transducin/WD-like repeat-protein OS=Medicago truncatula GN=MTR_3g054090 PE=4 SV=1	0	24.492	13.9535	3	9	3	1	301	32.7	6.13	High	High	High	High	High	High	High	Not Found		0	0.585	45.2	3
High	Master Protein	G7JAX6	Photosystem I reaction center subunit N OS=Medicago truncatula GN=MTR_3g095540 PE=2 SV=1	0	9.654	13.9535	3	9	3	1	172	18.5	8.9	High	High	High	High	High	Not Found	Not Found	Not Found	Carboxymethyl [K141]	0	2.162	27.68	3
High	Master Protein	A0A072VAP3	Cytochrome P450 family 72 protein OS=Medicago truncatula GN=MTR_2g072330 PE=4 SV=1	0	16.652	13.9423	6	10	2	1	416	48.1	9.35	High	High	Not Found	High	Not Found	Not Found	Not Found	Not Found		0	0.668	19.88	6
High	Master Protein	A0A072VR60	Lipid phosphate phosphatase-like protein OS=Medicago truncatula GN=MTR_1g109400 PE=4 SV=1	0	15.881	13.9319	2	5	2	1	323	36.2	6.76	High	Not Found	High	High	Not Found	Not Found	Not Found	Not Found		0	0.425	27.68	2
High	Master Protein	A0A072UPD9	Tetraspanin family protein OS=Medicago truncatula GN=MTR_4g098860 PE=4 SV=1	0	33.463	13.9286	3	11	2	1	280	31.6	5.2	Not Found	Not Found	Not Found	Not Found	High	Not Found	Not Found	Not Found	Phospho [S260; S268]	2	0.968	51.98	3
High	Master Protein	G7LI48	Phosphate carrier protein OS=Medicago truncatula GN=MTR_8g099910 PE=3 SV=2	0	10.014	13.9276	5	14	1	1	359	38.4	9.19	High	High	Not Found	Not Found	Not Found	Not Found	Not Found	Not Found		0	0.65	31.4	5
High	Master Protein	G7KGA4	FG-GAP repeat protein OS=Medicago truncatula GN=MTR_5g021150 PE=4 SV=2	0	38.85	13.9168	9	12	9	1	697	77.6	7.93	High	High	High	High	High	High	Not Found	Not Found		0	0.585	41.17	9
High	Master Protein	G7JUS9	UDP-glucuronic acid decarboxylase OS=Medicago truncatula GN=MTR_4g063600 PE=4 SV=2	0	13.771	13.913	4	4	2	1	345	38.5	6.89	Not Found	Not Found	Not Found	Not Found	High	Not Found	Not Found	Not Found		0	0.445	12.5	4
High	Master Protein	A0A072VKU9	Regulatory particle triple-A ATPase OS=Medicago truncatula GN=MTR_1g069105 PE=3 SV=1	0	32.935	13.9013	5	7	5	1	446	49.7	6.33	Not Found	Not Found	High	High	High	Not Found	High	Not Found		0	0.61	25.36	5
Medium	Master Protein	G7IH42	Cysteine-rich TM module stress tolerance protein OS=Medicago truncatula GN=MTR_2g069400 PE=4 SV=1	0.027	1.243	13.8889	1	1	1	1	72	7.7	6.92	Not Found	Not Found	Not Found	Not Found	Not Found	Not Found	High	Not Found		0	0.778	2.2	1
High	Master Protein	B7FM98	Plant/F25P12-18 protein OS=Medicago truncatula GN=MTR_1g084200 PE=2 SV=1	0	13.294	13.8728	3	3	3	1	173	19.4	5.21	Not Found	Medium	Not Found	Not Found	Not Found	Not Found	High	Not Found		0	0.874	10.52	3
High	Master Protein	A0A072U125	LRR receptor-like kinase, putative OS=Medicago truncatula GN=MTR_8g461110 PE=4 SV=1	0	66.497	13.87	9	20	8	1	1031	113.3	6.24	Not Found	High	High	High	High	High	Not Found	Not Found		0	0.585	92.18	9
High	Master Protein	A0A072UWX4	Small ubiquitin-related modifier OS=Medicago truncatula GN=MTR_3g053520 PE=3 SV=1	0	12.944	13.8614	3	3	3	1	101	11.2	5.1	Not Found	High	High	Not Found	Not Found	High	Not Found	Not Found		0	1.371	11.8	3
High	Master Protein	G7K2K1	Transmembrane protein, putative OS=Medicago truncatula GN=MTR_5g024680 PE=4 SV=1	0	16.555	13.8554	2	9	1	1	166	17.6	8.72	Not Found	High	High	Not Found	Not Found	Not Found	Not Found	Not Found		0	1.154	24.06	2
High	Master Protein	G7KQV2	SOUL heme-binding family protein OS=Medicago truncatula GN=MTR_7g104650 PE=4 SV=1	0	7.963	13.8514	5	7	5	1	296	33.4	9.36	High	High	Not Found	Not Found	High	High	High	Not Found		0	0.73	14.89	5
High	Master Protein	A0A072TMG8	Grave disease carrier protein OS=Medicago truncatula GN=MTR_8g027975 PE=3 SV=1	0	28.707	13.8504	6	22	5	1	361	39	9.45	High	High	High	High	High	High	High	Not Found		0	0.978	68.83	6
High	Master Protein	A0A072UN66	Appr-1-P processing enzyme family protein OS=Medicago truncatula GN=MTR_4g082640 PE=4 SV=1	0	31.685	13.8489	5	7	5	1	556	62	6.87	Not Found	Not Found	Not Found	High	High	High	High	Not Found		0	0.425	27.57	5
High	Master Protein	G7IQZ2	LRR receptor-like kinase OS=Medicago truncatula GN=MTR_2g075250 PE=4 SV=1	0	64.234	13.8477	10	20	9	1	1011	111.6	6.57	High	High	High	High	High	High	High	Not Found		0	0.453	82.64	10
High	Master Protein	G7JJT7	Signal recognition particle receptor subunit beta OS=Medicago truncatula GN=MTR_4g071550 PE=4 SV=1	0	26.304	13.8462	2	5	2	1	260	29.1	8.51	Not Found	Not Found	High	High	Not Found	High	Not Found	Not Found	Deamidated [Q249; Q251; R255]	0	0.638	16.3	2
High	Master Protein	G7IV78	NADH-quinone oxidoreductase cyanobacterial subunit N OS=Medicago truncatula GN=MTR_3g062890 PE=4 SV=1	0	7.293	13.8393	2	5	2	1	224	25	8.97	High	High	High	High	High	Not Found	Not Found	Not Found		0	0.359	22.63	2
Medium	Master Protein	G7JN21	Uncharacterized protein OS=Medicago truncatula GN=MTR_4g015540 PE=4 SV=1	0.036	1.101	13.8211	1	1	1	1	123	13.3	9.76	Not Found	Not Found	Not Found	High	Not Found	Not Found	Not Found	Not Found		0	0.778	3.45	1
High	Master Protein	A0A072TYI2	ABC transporter B family protein OS=Medicago truncatula GN=MTR_7g023340 PE=4 SV=1	0	97.607	13.8177	15	26	8	1	1404	155.5	6.35	Not Found	High	High	High	High	High	High	Not Found		0	0.683	121.38	15
High	Master Protein	G7KQ87	SURF1-like protein OS=Medicago truncatula GN=MTR_6g069850 PE=3 SV=1	0	24.964	13.8138	3	6	3	1	333	37.2	7.85	Not Found	Not Found	Not Found	High	High	High	Not Found	Not Found		0	0.931	29.8	3
High	Master Protein	A0A072VJ17	Glutathione S-transferase, amino-terminal domain protein OS=Medicago truncatula GN=MTR_1g059970 PE=4 SV=1	0	11.469	13.8138	4	7	4	1	333	36.9	8.87	High	Not Found	Not Found	High	High	Not Found	High	High		0	0.585	21.3	4
High	Master Protein	G7J834	Glucose-1-phosphate adenylyltransferase OS=Medicago truncatula GN=MTR_3g082150 PE=3 SV=1	0	28.064	13.8132	7	12	4	1	514	56.2	6.57	Not Found	High	Not Found	High	High	Not Found	High	Not Found		0	0.624	34.48	7
High	Master Protein	G7IE85	Thioredoxin-like protein OS=Medicago truncatula GN=MTR_1g114290 PE=2 SV=1	0	11.819	13.8122	2	2	2	1	181	19.9	8.28	High	Not Found	Not Found	Not Found	Not Found	Not Found	High	Not Found		0	0.468	7.67	2
High	Master Protein	G7IRR3	4-hydroxy-3-methylbut-2-enyl diphosphate synthase OS=Medicago truncatula GN=MTR_2g094160 PE=3 SV=2	0	40.281	13.7838	9	9	9	1	740	82.2	6.21	Not Found	Not Found	High	High	High	High	High	Not Found		0	0.413	32.05	9
High	Master Protein	A0A072UGQ1	Coatomer subunit beta OS=Medicago truncatula GN=MTR_4g008250 PE=4 SV=1	0	65.526	13.775	11	16	11	1	951	106	5.87	Not Found	High	High	High	Not Found	High	High	Not Found		0	0.647	66.2	11
High	Master Protein	G7J5Z8	Serine/Threonine-kinase HT1-like protein OS=Medicago truncatula GN=MTR_3g078110 PE=4 SV=2	0	35.156	13.7741	7	21	1	1	363	40.6	6.04	Not Found	Not Found	Not Found	Not Found	Not Found	Not Found	High	Not Found	Deamidated [R259]	0	1.894	65.74	7
High	Master Protein	G7IDM5	Sucrose-binding protein-like protein OS=Medicago truncatula GN=MTR_1g071710 PE=4 SV=1	0	21.724	13.7652	6	10	6	1	494	56	6.4	Not Found	Not Found	High	High	High	High	High	Not Found		0	0.54	32.88	6
High	Master Protein	G7K4G4	CBS domain protein/transporter associated domain protein OS=Medicago truncatula GN=MTR_5g094740 PE=4 SV=1	0	73.065	13.7637	10	29	10	1	821	91.7	6.21	High	High	High	High	High	High	High	Not Found	Phospho [S638]	1	1.054	107.92	10
High	Master Protein	G7JUV4	ATP-dependent zinc metalloprotease FTSH protein OS=Medicago truncatula GN=MTR_4g064350 PE=3 SV=1	0	37.819	13.7546	9	17	7	1	807	89.2	6.71	High	High	High	High	High	High	Not Found	Not Found		0	0.598	55.34	9
High	Master Protein	S4T0Q1	Cytochrome b6-f complex subunit 4 OS=Medicago truncatula GN=petD PE=3 SV=1	0	18.425	13.75	4	20	4	1	160	17.5	7.18	High	High	High	High	High	High	High	Not Found	Deamidated [R15]	0	4.623	72.17	4
High	Master Protein	G7KZ69	Late embryogenesis abundant protein OS=Medicago truncatula GN=MTR_7g074250 PE=4 SV=1	0	12.696	13.7441	2	3	2	1	211	23.1	9.31	Not Found	Not Found	Not Found	High	High	Not Found	Not Found	Not Found		0	0.425	12.73	2
High	Master Protein	G7K7U6	Hydrogen peroxide induced protein, putative OS=Medicago truncatula GN=MTR_5g008210 PE=2 SV=1	0	7.944	13.7405	1	1	1	1	131	14	6.68	Not Found	Not Found	High	Not Found	Not Found	Not Found	Not Found	Not Found		0	0.389	6.2	1
High	Master Protein	B7FGG9	Acyl-CoA N-acyltransferase (NAT) family protein OS=Medicago truncatula GN=MTR_1g049370 PE=2 SV=1	0	10.489	13.7339	3	5	3	1	233	26.5	6.29	Not Found	Not Found	High	High	Not Found	Not Found	High	Not Found		0	1.512	14.53	3
High	Master Protein	G7K1Y1	PfkB family carbohydrate kinase OS=Medicago truncatula GN=MTR_5g079460 PE=3 SV=1	0	17.861	13.7306	5	7	4	1	386	41.4	5.39	Not Found	Not Found	High	High	Not Found	High	Not Found	Not Found		0	0.532	21.15	5
High	Master Protein	A0A072VHL0	Eukaryotic translation initiation factor 3 subunit E OS=Medicago truncatula GN=MTR_1g051820 PE=3 SV=1	0	27.371	13.73	5	8	3	1	437	51.1	5.57	High	High	High	Not Found	High	Not Found	Not Found	Not Found		0	0.52	31.04	5
High	Master Protein	G7KE92	Cytochrome P450 family 71 protein OS=Medicago truncatula GN=MTR_5g070920 PE=3 SV=1	0	33.139	13.7255	8	10	4	1	510	57.9	8.38	High	Not Found	Not Found	High	Not Found	High	Medium	Not Found		0	0.778	30.42	8
High	Master Protein	A0A072V5R8	Cytochrome P450 family 81 protein OS=Medicago truncatula GN=MTR_2g437880 PE=3 SV=1	0	21.995	13.7177	6	7	6	1	503	57.4	8.35	High	Not Found	Not Found	Not Found	High	High	High	Not Found		0	0.501	21.88	6
High	Master Protein	A0A072VIS6	Late embryogenesis abundant protein OS=Medicago truncatula GN=MTR_1g057270 PE=4 SV=1	0	21.274	13.7097	4	8	4	1	248	28.5	8.66	High	Medium	High	High	High	High	Not Found	Not Found		0	1.424	28.3	4
High	Master Protein	G7J2P6	Cleft lip and palate transmembrane protein OS=Medicago truncatula GN=MTR_3g098210 PE=4 SV=1	0	38.355	13.7056	8	15	8	1	591	67.7	5.77	High	High	High	High	High	High	High	High		0	0.874	63.29	8
High	Master Protein	G7KT76	Ferritin OS=Medicago truncatula GN=MTR_7g069980 PE=2 SV=1	0	7.547	13.6719	3	3	2	1	256	28.8	6.46	Not Found	High	Not Found	High	Not Found	Not Found	Not Found	Not Found		0	0.438	7.94	3
High	Master Protein	A0A072TXL0	Monodehydroascorbate reductase OS=Medicago truncatula GN=MTR_7g034715 PE=4 SV=1	0	56.751	13.6646	7	23	7	1	483	52.2	8.02	High	High	High	High	High	High	High	High		0	1.512	98.5	7
High	Master Protein	G7IQD5	Acyl-CoA thioesterase OS=Medicago truncatula GN=MTR_2g045050 PE=2 SV=1	0	8.572	13.6646	1	1	1	1	161	17.3	9.25	Not Found	Not Found	Not Found	High	Not Found	Not Found	Not Found	Not Found		0	0.212	6.78	1
High	Master Protein	G7IFV1	Synaptobrevin-like protein OS=Medicago truncatula GN=MTR_2g028790 PE=3 SV=1	0	36.942	13.6364	4	25	3	1	220	24.9	8.38	High	High	High	High	High	High	Not Found	Not Found		0	2.455	88.26	4
High	Master Protein	B7FMZ2	Ribosomal protein S21 OS=Medicago truncatula GN=MTR_7g029325 PE=2 SV=1	0	5.628	13.6364	2	4	2	1	198	22.6	8.12	Not Found	Not Found	Not Found	Not Found	High	High	Not Found	Not Found		0	0.874	14.46	2
High	Master Protein	B7FGH4	Synaptobrevin-like protein OS=Medicago truncatula GN=MTR_4g083490 PE=2 SV=1	0	17.598	13.6364	3	15	2	1	220	24.8	8.91	High	Not Found	Not Found	High	High	High	High	Not Found		0	1.61	42.02	3
High	Master Protein	A0A072UF37	CS domain protein OS=Medicago truncatula GN=MTR_7g108860 PE=4 SV=1	0	6.623	13.6364	3	3	3	1	242	25.5	4.5	Not Found	Not Found	Not Found	High	Not Found	Medium	Not Found	High		0	0.54	7.78	3
High	Master Protein	G7JN29	Temperature-sensitive omega-3 fatty acid desaturase OS=Medicago truncatula GN=MTR_4g015630 PE=4 SV=1	0	45.159	13.6364	3	8	3	1	440	50.1	9	Not Found	High	High	High	High	Not Found	Not Found	Not Found		0	0.468	58.08	3
High	Master Protein	A0A072VAH1	Choline-phosphate cytidylyltransferase OS=Medicago truncatula GN=MTR_3g081530 PE=4 SV=1	0	16.077	13.6364	2	2	1	1	308	35.9	5.14	Not Found	Not Found	Not Found	High	Not Found	Not Found	Not Found	Not Found		0	0.311	12.34	2
High	Master Protein	G7I6G8	Cytochrome P450 family 71 protein OS=Medicago truncatula GN=MTR_1g023730 PE=3 SV=2	0	42.878	13.6187	6	10	5	1	514	59	8.16	High	Not Found	High	High	Not Found	Not Found	Not Found	Not Found		0	0.808	41.79	6
High	Master Protein	G7KWC0	Dirigent protein OS=Medicago truncatula GN=MTR_7g093790 PE=2 SV=1	0	7.857	13.6126	2	2	2	1	191	20.8	5.26	Not Found	Not Found	Not Found	High	High	Not Found	Not Found	Not Found		0	0.468	7.62	2
High	Master Protein	B7FN63	Photosystem I reaction center subunit VI OS=Medicago truncatula GN=MTR_2g101820 PE=2 SV=1	0	11.136	13.6054	4	12	4	1	147	15.6	9.8	High	High	High	High	High	High	Not Found	Not Found		0	2.162	30.8	4
High	Master Protein	G7IF78	Multidrug resistance protein ABC transporter family protein OS=Medicago truncatula GN=MTR_1g088680 PE=4 SV=1	0	92.199	13.5974	19	47	17	1	1515	169.4	7.8	High	High	High	High	High	High	High	High	Phospho [T681]	1	0.767	167.54	19
High	Master Protein	G7ILL5	26S proteasome non-ATPase regulatory subunit-like protein OS=Medicago truncatula GN=MTR_2g017680 PE=2 SV=1	0	11.179	13.5922	4	6	1	1	309	34.5	6.8	Not Found	Not Found	Not Found	Not Found	Not Found	Not Found	Not Found	High		0	0.52	17.55	4
High	Master Protein	G7I6G5	Cytochrome P450 family 71 protein OS=Medicago truncatula GN=MTR_1g023700 PE=3 SV=2	0	17.323	13.5922	6	6	5	1	515	59	6.93	High	Not Found	Not Found	High	Medium	High	Not Found	Not Found		0	0.585	15.91	6
Medium	Master Protein	G7IYH1	Molybdopterin synthase sulfur carrier subunit OS=Medicago truncatula GN=MTR_3g008540 PE=2 SV=2	0.018	1.442	13.5922	1	1	1	1	103	11.2	4.75	Not Found	Not Found	Not Found	Not Found	High	Not Found	Not Found	Not Found		0	0.334	2.89	1
High	Master Protein	A0A072VM24	Uncharacterized protein OS=Medicago truncatula GN=MTR_1g073660 PE=4 SV=1	0	6.915	13.5922	1	1	1	1	103	11.3	4.88	Not Found	Not Found	Not Found	Not Found	High	Not Found	Not Found	Not Found		0	0.468	4.77	1
High	Master Protein	B7FJB1	Peptide methionine sulfoxide reductase family protein OS=Medicago truncatula GN=MTR_5g092680 PE=2 SV=1	0	9.027	13.5849	4	4	4	1	265	29.4	8.4	Not Found	Not Found	Not Found	High	High	High	Not Found	Not Found		0	0.778	13.66	4
High	Master Protein	G7J3W6	Ubiquitin-like modifier-activating enzyme OS=Medicago truncatula GN=MTR_3g099240 PE=2 SV=1	0	17.35	13.5831	4	5	1	1	427	46.8	4.77	Not Found	Not Found	Not Found	Not Found	Not Found	High	Not Found	Not Found		0	0.492	19.81	4
High	Master Protein	G7IQF1	Ubiquitin-like modifier-activating enzyme OS=Medicago truncatula GN=MTR_2g045230 PE=4 SV=1	0	16.855	13.5831	4	5	1	1	427	46.9	4.77	Not Found	Not Found	Not Found	Not Found	Not Found	High	Not Found	Not Found		0	0.492	20.1	4
High	Master Protein	A0A072TU08	Hydroxysteroid 11-beta-dehydrogenase-like protein OS=Medicago truncatula GN=MTR_8g096580 PE=3 SV=1	0	27.676	13.5802	3	5	3	1	324	35.9	8.28	Not Found	Not Found	High	High	High	Not Found	Not Found	Not Found		0	0.551	23.28	3
High	Master Protein	A0A072UJW8	Zinc finger, C3HC4 type family protein, putative OS=Medicago truncatula GN=MTR_4g459450 PE=4 SV=1	0.003	2.205	13.5802	1	2	1	1	81	9.1	9.99	Not Found	Not Found	Not Found	High	Not Found	Not Found	Not Found	Not Found		0	1.154	4.47	1
High	Master Protein	G7JSQ2	Sugar porter (SP) family MFS transporter OS=Medicago truncatula GN=MTR_4g077740 PE=3 SV=1	0	17.153	13.5729	6	13	6	1	501	53.7	6.04	High	High	Medium	High	High	High	High	Not Found		0	1.154	41.86	6
High	Master Protein	G7K2L9	Thioredoxin reductase OS=Medicago truncatula GN=MTR_5g024900 PE=3 SV=1	0	12.401	13.5638	2	2	2	1	376	40.2	7.31	High	Not Found	Not Found	High	Not Found	Not Found	Not Found	Not Found		0	0.194	13.2	2
High	Master Protein	A0A072UYZ3	AAA family ATPase OS=Medicago truncatula GN=MTR_4g088885 PE=4 SV=1	0	41.7	13.5638	9	13	9	1	752	82.7	6.13	High	High	High	High	High	High	Not Found	Not Found		0	0.708	49.94	9
High	Master Protein	S4SZI8	30S ribosomal protein S2 OS=Medicago truncatula GN=rps2 PE=3 SV=1	0	14.476	13.5593	4	9	4	1	236	27.1	9.45	High	High	High	High	High	High	Not Found	Not Found		0	1.154	30.92	4
High	Master Protein	A0A072V8L1	Citrate synthase OS=Medicago truncatula GN=MTR_2g061630 PE=3 SV=1	0	25.277	13.5593	7	7	7	1	472	52.5	7.42	Not Found	Not Found	Not Found	High	High	Not Found	High	Not Found		0	0.817	24.04	7
High	Master Protein	G7L290	OPT family oligopeptide transporter OS=Medicago truncatula GN=MTR_7g028250 PE=4 SV=1	0	46.51	13.5493	9	31	9	1	679	74.3	6.2	High	High	High	High	High	Not Found	Not Found	Not Found		0	0.884	101.4	9
High	Master Protein	A0A072VM69	Electron transfer flavoprotein subunit beta OS=Medicago truncatula GN=MTR_1g074170 PE=4 SV=1	0	13.425	13.5458	2	2	2	1	251	27.7	7.75	Not Found	Not Found	Not Found	Not Found	High	High	Not Found	Not Found		0	0.334	9.75	2
High	Master Protein	A0A072UZY2	LRR receptor-like kinase family protein OS=Medicago truncatula GN=MTR_3g075440 PE=4 SV=1	0	42.255	13.535	8	18	7	1	628	69.9	9.13	High	High	High	High	High	High	High	High		0	0.619	64.9	8
High	Master Protein	A0A072VM79	Serine/Threonine kinase family protein OS=Medicago truncatula GN=MTR_1g077800 PE=4 SV=1	0	35.282	13.5286	7	7	7	1	717	79.4	6.47	Not Found	Not Found	Not Found	High	High	Not Found	High	Not Found		0	0.389	27.87	7
High	Master Protein	A0A072VFE4	Aldehyde dehydrogenase OS=Medicago truncatula GN=MTR_1g029840 PE=3 SV=1	0	40.122	13.5246	5	14	2	1	488	53.6	8.35	Not Found	Not Found	Not Found	High	Not Found	High	Not Found	Not Found		0	0.978	55.93	5
High	Master Protein	A0A072UYD4	ARM repeat RING/U-box protein OS=Medicago truncatula GN=MTR_3g466220 PE=4 SV=1	0	46.156	13.5167	8	11	8	1	836	90.6	5.69	High	High	High	High	High	Not Found	High	Not Found		0	0.429	42.18	8
Medium	Master Protein	A0A072VBT7	Uncharacterized protein OS=Medicago truncatula GN=MTR_2g083817 PE=4 SV=1	0.022	1.397	13.5135	1	1	1	1	74	8.7	7.34	Not Found	Not Found	Not Found	Not Found	Not Found	Not Found	Not Found	High		0	0.585	2.69	1
High	Master Protein	G7ILE3	Organic solute transporter ostalpha protein OS=Medicago truncatula GN=MTR_2g012360 PE=4 SV=1	0	26.591	13.5135	3	4	3	1	296	34.3	8.4	High	Not Found	Not Found	Not Found	Not Found	Not Found	High	Not Found		0	0.719	19.42	3
High	Master Protein	I3T063	Ribosomal protein L7Ae/L30e/S12e/Gadd45 family protein OS=Medicago truncatula GN=MTR_4g074260 PE=2 SV=1	0	12.871	13.5135	3	5	1	1	259	29.5	10.18	Not Found	Not Found	Not Found	Not Found	Not Found	High	Not Found	Not Found		0	0.501	15.08	3
High	Master Protein	Q2HTQ3	Granulin; Peptidase C1A, papain OS=Medicago truncatula GN=MTR_1g018840 PE=3 SV=1	0	27.781	13.5021	5	9	5	1	474	52.2	6.28	Not Found	Not Found	Not Found	High	High	High	High	Not Found		0	0.585	34.87	5
High	Master Protein	A0A072UAH3	3,4-dihydroxy-2-butanone kinase, putative OS=Medicago truncatula GN=MTR_6g073003 PE=4 SV=1	0	24.481	13.4907	5	5	5	1	593	61.8	5.34	Not Found	High	Not Found	High	High	High	Not Found	Not Found		0	0.365	19.06	5
High	Master Protein	A0A072V0Q7	Glutathione S-transferase, amino-terminal domain protein OS=Medicago truncatula GN=MTR_3g088635 PE=4 SV=1	0	9.043	13.4831	3	4	3	1	267	31.6	8.92	Not Found	Not Found	High	High	Not Found	High	Not Found	Not Found		0	0.413	13.8	3
High	Master Protein	O04998	Glutamine synthetase OS=Medicago truncatula GN=MTR_6g071070 PE=1 SV=1	0	17.339	13.4831	4	10	4	1	356	39.2	5.73	High	High	High	High	High	Medium	Not Found	Not Found		0	0.968	40.72	4
High	Master Protein	A0A072TMU3	Mitogen-activated protein kinase OS=Medicago truncatula GN=MTR_8g028720 PE=3 SV=1	0	13.732	13.4771	5	10	3	1	371	42.8	6.25	Not Found	Not Found	Not Found	High	High	High	Not Found	Not Found		0	0.487	26.87	5
High	Master Protein	A0A072UAX4	Non-specific serine/threonine protein kinase OS=Medicago truncatula GN=MTR_6g048250 PE=4 SV=1	0	28.128	13.4766	5	6	1	1	512	58.3	8.41	Not Found	Not Found	Not Found	Not Found	High	Not Found	Not Found	Not Found		0	0.501	24.17	5
High	Master Protein	G7IC41	Phosphogluco-mutase OS=Medicago truncatula GN=MTR_1g102010 PE=4 SV=1	0	49.067	13.4707	6	10	6	1	631	69.5	6.25	Not Found	Not Found	High	High	High	Not Found	High	Not Found		0	0.585	43.25	6
High	Master Protein	A0A072UZM7	Sieve element occlusion protein OS=Medicago truncatula GN=MTR_3g075450 PE=4 SV=1	0	26.48	13.4561	8	13	8	1	706	80.4	6.24	High	High	High	High	High	Medium	High	Not Found		0	0.435	32.75	8
High	Master Protein	G7L5Y7	Transcriptional activator OS=Medicago truncatula GN=MTR_7g104020 PE=4 SV=1	0	4.398	13.4503	3	5	3	1	171	20	6.62	Not Found	High	High	High	Not Found	Not Found	High	Not Found		0	0.701	10.4	3
High	Master Protein	G7IU50	V-type proton ATPase subunit a OS=Medicago truncatula GN=MTR_2g093210 PE=3 SV=2	0	38.847	13.4474	9	11	8	1	818	93.6	6.34	High	Not Found	High	High	Medium	High	Not Found	High	Carboxymethyl [K53]	0	0.557	38.04	9
High	Master Protein	G7JW03	Adenine phosphoribosyltransferase-like protein OS=Medicago truncatula GN=MTR_5g012210 PE=2 SV=1	0	5.808	13.4409	2	2	2	1	186	20.5	7.33	Not Found	Not Found	Not Found	High	Not Found	Not Found	Not Found	Not Found		0	0.52	6.18	2
High	Master Protein	G7KTL6	1-acyl-sn-glycerol-3-phosphate acyltransferase-like protein OS=Medicago truncatula GN=MTR_7g092280 PE=4 SV=1	0	22.031	13.4367	4	6	2	1	387	43.5	9.45	High	High	High	Not Found	Not Found	Not Found	Not Found	Not Found		0	0.557	17.86	4
High	Master Protein	G7ICW3	Heme-binding protein OS=Medicago truncatula GN=MTR_1g086810 PE=4 SV=1	0	28.528	13.4247	4	9	4	1	365	40.2	5.39	High	Not Found	Not Found	High	High	Not Found	Not Found	Not Found		0	0.995	31.4	4
High	Master Protein	G7JTZ9	Sphingolipid transporter spinster-like protein, putative OS=Medicago truncatula GN=MTR_4g092770 PE=4 SV=2	0	26.814	13.4216	5	9	5	1	529	57.1	7.34	High	Not Found	Not Found	High	High	High	Not Found	Not Found		0	0.562	40.95	5
High	Master Protein	G7I4G9	26S proteasome non-ATPase regulatory subunit-like protein OS=Medicago truncatula GN=MTR_1g019930 PE=4 SV=1	0	9.208	13.4185	4	6	1	1	313	34.9	6.8	Not Found	Not Found	Not Found	Not Found	Not Found	Not Found	High	Not Found		0	0.52	17.75	4
High	Master Protein	G7J7B0	Amine oxidase OS=Medicago truncatula GN=MTR_3g080500 PE=3 SV=1	0	32.672	13.4063	8	9	8	1	731	82.6	6.25	Not Found	Not Found	High	High	High	Not Found	Not Found	Not Found		0	0.506	31.61	8
High	Master Protein	A0A072UHP4	Uncharacterized protein OS=Medicago truncatula GN=MTR_4g017880 PE=4 SV=1	0	8.943	13.4021	2	3	2	1	194	20.8	4.82	Not Found	High	High	Not Found	Not Found	Not Found	High	Not Found		0	0.52	10.79	2
High	Master Protein	A0A072US24	DIL domain myosin family protein OS=Medicago truncatula GN=MTR_4g125690 PE=3 SV=1	0	74.167	13.3987	16	20	14	1	1530	172.5	8.57	High	High	High	High	High	High	High	Not Found	Phospho [S1520]	1	0.468	70.08	16
High	Master Protein	B7FKX2	UDP-glucuronic acid decarboxylase OS=Medicago truncatula GN=MTR_2g096660 PE=2 SV=1	0	18.254	13.3903	5	6	3	1	351	39.6	7.21	Not Found	Not Found	Not Found	Not Found	High	High	Not Found	Not Found		0	0.557	18.34	5
High	Master Protein	G7JFU3	Arginase family protein OS=Medicago truncatula GN=MTR_4g024940 PE=3 SV=2	0	18.286	13.3891	2	6	2	1	239	26.2	6.43	Not Found	High	High	Not Found	Not Found	Not Found	Not Found	Not Found		0	0.701	29.85	2
High	Master Protein	B7FN38	Kunitz type trypsin inhibitor / Alpha-fucosidase OS=Medicago truncatula GN=MTR_6g066190 PE=2 SV=1	0	9.931	13.3641	1	1	1	1	217	22.9	4.91	Not Found	Not Found	High	Not Found	Not Found	Not Found	Not Found	Not Found		0	0.292	7.72	1
High	Master Protein	G7IDZ4	Heat shock protein 81-2 OS=Medicago truncatula GN=MTR_1g099840 PE=3 SV=1	0	46.165	13.3527	10	28	3	1	689	79.3	5.05	High	High	Not Found	High	High	High	Not Found	Not Found		0	1.04	82.98	10
High	Master Protein	G7IMQ7	Rab5-interacting family protein OS=Medicago truncatula GN=MTR_2g033590 PE=4 SV=1	0	4.115	13.3333	1	2	1	1	120	13.2	9.04	Not Found	Not Found	High	Not Found	High	Not Found	Not Found	Not Found		0	0.292	9.37	1
High	Master Protein	A0A072VQK3	Lipase OS=Medicago truncatula GN=MTR_1g107330 PE=3 SV=1	0	25.445	13.3333	4	6	4	1	405	45.5	6.71	High	Not Found	High	High	High	Not Found	Not Found	Not Found		0	0.585	23.19	4
High	Master Protein	A0A072VZX3	Sphingoid base hydroxylase-like protein OS=Medicago truncatula GN=MTR_1g097310 PE=3 SV=1	0	8.498	13.3333	3	3	3	1	255	29.3	8.38	Not Found	Not Found	High	Not Found	High	High	Not Found	Not Found		0	0.701	10.73	3
Medium	Master Protein	Q2HSC8	Cytochrome b559, alpha/beta subunit PbsEF protein OS=Medicago truncatula GN=MTR_2g076050 PE=4 SV=1	0.012	1.625	13.3333	1	3	1	1	60	7.2	10.78	Medium	High	High	Not Found	Not Found	Not Found	Not Found	Not Found		0	0.778	5.29	1
High	Master Protein	G7JVF8	Histone H4 OS=Medicago truncatula GN=MTR_4g128150 PE=3 SV=2	0	35.699	13.3159	9	28	9	1	383	43.3	9.42	High	High	High	High	High	High	Not Found	Not Found		0	2.162	76.07	9
High	Master Protein	G8A2H2	Haloacid dehalogenase-like hydrolase OS=Medicago truncatula GN=MTR_3g075230 PE=4 SV=1	0	12.038	13.3127	4	9	4	1	323	34.9	7.68	High	Not Found	High	High	High	Not Found	Not Found	Not Found		0	1.154	21.78	4
High	Master Protein	B7FHM1	Caffeoyl-CoA 3-O-methyltransferase OS=Medicago truncatula GN=MTR_4g094815 PE=2 SV=1	0	10.929	13.3065	3	3	3	1	248	27.8	5.26	Not Found	Not Found	Not Found	Not Found	Not Found	High	High	Not Found		0	0.638	9.39	3
High	Master Protein	G7LDS2	30S ribosomal protein S20 OS=Medicago truncatula GN=MTR_8g061350 PE=3 SV=1	0	14.191	13.2948	3	4	3	1	173	19.1	10.58	Not Found	High	High	Not Found	Not Found	Not Found	High	Not Found		0	1.031	12.04	3
High	Master Protein	G7KTM5	Carbohydrate-binding-like fold protein OS=Medicago truncatula GN=MTR_7g109730 PE=4 SV=2	0	52.586	13.2943	14	22	14	1	1196	130.4	6.06	High	High	High	High	High	High	High	Not Found		0	0.627	77.68	14
High	Master Protein	G7KNP2	Chloride channel protein OS=Medicago truncatula GN=MTR_6g023770 PE=3 SV=2	0	27.352	13.2903	8	13	7	1	775	86.1	6.76	High	High	High	High	High	Not Found	Not Found	Not Found		0	0.506	45.2	8
High	Master Protein	G7J5Z1	Dolichyl-diphosphooligosaccharide--protein glycosyltransferase subunit 1 OS=Medicago truncatula GN=MTR_3g115980 PE=3 SV=2	0	31.011	13.2901	6	8	6	1	617	69.6	7.72	High	High	High	High	Not Found	Not Found	Not Found	Not Found		0	0.482	32.11	6
High	Master Protein	G7JTH4	Caffeic acid O-methyltransferase OS=Medicago truncatula GN=MTR_4g038440 PE=2 SV=1	0	19.602	13.2791	5	6	5	1	369	41.3	6.29	High	Not Found	High	Not Found	High	High	Not Found	Not Found		0	0.557	19.13	5
High	Master Protein	G7IYB2	DUF543 domain protein OS=Medicago truncatula GN=MTR_3g005050 PE=4 SV=1	0.001	3.195	13.2653	1	1	1	1	98	10.7	5.14	Not Found	Not Found	Not Found	Not Found	Not Found	Not Found	High	Not Found		0	0.389	2.84	1
High	Master Protein	G7IQY1	Plant/F14G9-20 protein OS=Medicago truncatula GN=MTR_2g066060 PE=2 SV=2	0	24.064	13.2653	4	7	4	1	392	43.5	6.55	High	High	Not Found	High	High	Not Found	Not Found	Not Found		0	0.65	25.79	4
High	Master Protein	G7K028	Phosphoinositide phosphatase SAC1 OS=Medicago truncatula GN=MTR_5g023960 PE=4 SV=2	0	51.865	13.255	8	21	8	1	596	67.8	7.87	High	High	High	High	High	High	Not Found	Not Found		0	0.828	81.82	8
High	Master Protein	G8A1R5	50S ribosomal protein L31 OS=Medicago truncatula GN=MTR_1g022450 PE=3 SV=1	0	6.98	13.2353	1	1	1	1	136	15.3	9.72	Not Found	High	Not Found	Not Found	Not Found	Not Found	Not Found	Not Found		0	0.233	5.89	1
High	Master Protein	G7JQ35	Pti1-like kinase OS=Medicago truncatula GN=MTR_4g123870 PE=4 SV=1	0	21.907	13.2316	4	9	1	1	393	43.5	8.95	Not Found	High	Not Found	Not Found	Not Found	Not Found	Not Found	Not Found		0	0.532	35.25	4
High	Master Protein	G7IPX6	DUF642 family protein OS=Medicago truncatula GN=MTR_2g019600 PE=4 SV=1	0	21.882	13.2316	5	7	5	1	393	43.1	5.06	Not Found	Not Found	Not Found	High	High	High	High	Not Found		0	0.73	27.3	5
High	Master Protein	G8A0T5	Transmembrane protein, putative OS=Medicago truncatula GN=MTR_1g105890 PE=4 SV=1	0	27.151	13.211	3	3	3	1	545	60.2	4.41	Not Found	Not Found	Not Found	Not Found	High	Not Found	High	Not Found		0	0.259	20.95	3
High	Master Protein	G7IMW8	Importin subunit alpha OS=Medicago truncatula GN=MTR_2g034900 PE=3 SV=2	0	41.949	13.2075	5	9	1	1	530	58.4	5.26	Not Found	Not Found	Not Found	High	High	Not Found	Not Found	Not Found		0	0.711	42.38	5
High	Master Protein	G7J8M7	Glutamate decarboxylase OS=Medicago truncatula GN=MTR_3g064740 PE=3 SV=1	0	19.733	13.189	5	8	2	1	508	57.5	5.72	Not Found	Not Found	High	Not Found	Not Found	High	Not Found	Not Found		0	0.585	30.09	5
High	Master Protein	G7LDY1	Sugar porter (SP) family MFS transporter OS=Medicago truncatula GN=MTR_8g077310 PE=3 SV=1	0	46.429	13.1687	7	21	7	1	486	52.3	8.5	High	High	High	High	High	Not Found	Not Found	Not Found	Phospho [T20; S22]	2	1.512	81.94	7
High	Master Protein	G7IB88	Calcineurin B-like protein 4-1 OS=Medicago truncatula GN=MTR_1g016430 PE=4 SV=1	0	10.466	13.1673	3	4	3	1	281	32	4.75	High	Not Found	Not Found	Not Found	High	Not Found	Not Found	High		0	0.668	9.09	3
High	Master Protein	G7KEI7	Red chlorophyll catabolite reductase, putative OS=Medicago truncatula GN=MTR_5g096150 PE=4 SV=2	0	11.774	13.1661	3	3	3	1	319	35.8	5.96	High	High	Not Found	Not Found	Not Found	High	Not Found	Not Found		0	0.389	11.61	3
High	Master Protein	A0A072U5M2	Substrate carrier family protein OS=Medicago truncatula GN=MTR_7g109135 PE=3 SV=1	0	11.677	13.1661	3	4	3	1	319	34.6	9.17	High	High	Not Found	Not Found	Not Found	High	Not Found	Not Found		0	0.413	13.63	3
High	Master Protein	G8A0X6	Cysteine-rich receptor-kinase-like protein OS=Medicago truncatula GN=MTR_1g105650 PE=4 SV=1	0	34.932	13.1619	7	15	6	1	661	73.1	6.68	High	High	High	High	High	Not Found	High	Not Found		0	0.492	56.84	7
High	Master Protein	A0A072UXZ4	Cold-regulated protein, putative OS=Medicago truncatula GN=MTR_3g067720 PE=4 SV=1	0.001	2.795	13.1579	1	2	1	1	76	8.3	10.93	Not Found	Not Found	High	High	Not Found	Not Found	Not Found	Not Found		0	1.154	5.17	1
High	Master Protein	A0A072VR75	Cobalamin biosynthesis protein OS=Medicago truncatula GN=MTR_1g115505 PE=4 SV=1	0	36.658	13.1403	4	7	4	1	449	49.9	6.27	High	High	Not Found	High	Not Found	High	Not Found	Not Found		0	0.668	30.8	4
High	Master Protein	A0A072TXT5	Transmembrane protein, putative OS=Medicago truncatula GN=MTR_8g016210 PE=4 SV=1	0	4.733	13.1148	2	2	2	1	183	20.4	9.64	Not Found	Not Found	Not Found	High	Not Found	Not Found	High	Not Found		0	0.585	5.91	2
High	Master Protein	G7IY23	F0F1 ATP synthase subunit gamma OS=Medicago truncatula GN=MTR_3g052270 PE=3 SV=1	0	18.268	13.1054	4	7	3	1	351	38.9	8.47	Not Found	Not Found	Not Found	Not Found	Not Found	High	High	Not Found		0	0.688	25.18	4
High	Master Protein	A0A072W1D1	Glycosyltransferase OS=Medicago truncatula GN=MTR_1g107380 PE=3 SV=1	0	31.878	13.0977	4	5	4	1	481	53.9	4.94	Not Found	High	Not Found	High	Not Found	Not Found	High	Not Found		0	0.509	23.35	4
High	Master Protein	G7J6C8	Inner membrane import protein Tic22, putative OS=Medicago truncatula GN=MTR_3g101630 PE=4 SV=1	0	10.722	13.0952	3	3	3	1	252	28.3	9.22	Not Found	Not Found	High	Not Found	High	High	Not Found	Not Found		0	0.438	10.68	3
High	Master Protein	G7L1D0	Cytochrome P450 family protein OS=Medicago truncatula GN=MTR_7g075610 PE=3 SV=1	0	23.643	13.0952	7	9	5	1	504	56.6	8.44	High	High	Not Found	High	High	High	Not Found	Not Found		0	0.848	28.9	7
High	Master Protein	G7LAH7	Plant cadmium resistance protein OS=Medicago truncatula GN=MTR_8g104870 PE=2 SV=1	0	18.048	13.089	2	19	1	1	191	20.5	5.83	High	High	High	High	High	High	High	Not Found		0	3.642	64.08	2
High	Master Protein	G7JQA8	Photosystem I assembly protein Ycf4 OS=Medicago truncatula GN=MTR_4g034770 PE=4 SV=2	0	41.363	13.0802	4	26	4	1	474	53.3	4.48	Medium	High	High	High	High	High	Not Found	Not Found		0	1.154	111.38	4
High	Master Protein	G7KQU5	Phospholipid/glycerol acyltransferase family protein OS=Medicago truncatula GN=MTR_7g104580 PE=4 SV=1	0	47.084	13.0769	6	18	6	1	390	43.7	8.51	Not Found	Medium	High	High	High	High	High	Not Found	Phospho [S37; S39]	2	1.371	66.96	6
High	Master Protein	Q5ENY3	Calcium-binding EF-hand; Ferric reductase-like transmembrane component (Fragment) OS=Medicago truncatula GN=MTR_7g113130 PE=2 SV=1	0	66.118	13.0726	10	22	9	1	895	101.7	9.35	High	High	High	High	High	High	High	Not Found		0	0.675	93.93	10
High	Master Protein	A0A072UCW1	Auxin efflux carrier family protein OS=Medicago truncatula GN=MTR_5g024970 PE=4 SV=1	0	25.119	13.0631	5	18	5	1	444	48.3	8.28	High	High	High	High	High	High	Not Found	Not Found		0	0.905	62.68	5
High	Master Protein	G7KPX0	Receptor-like kinase OS=Medicago truncatula GN=MTR_6g088610 PE=4 SV=1	0	40.312	13.0564	9	21	8	1	674	71.6	7.97	High	High	High	High	High	High	High	Not Found		0	1.754	67.49	9
High	Master Protein	A0A072UMT0	Cytochrome P450 family 71 protein OS=Medicago truncatula GN=MTR_4g089030 PE=3 SV=1	0	29.76	13.0518	5	12	4	1	521	59.2	6.38	High	High	High	High	High	High	High	Not Found		0	0.63	52.18	5
High	Master Protein	G7KFF6	Serine/Threonine kinase family protein OS=Medicago truncatula GN=MTR_5g099130 PE=3 SV=1	0	11.137	13.0326	5	11	4	1	399	43.4	8.95	High	Not Found	High	High	High	High	Not Found	Not Found		0	0.616	29.93	5
High	Master Protein	G7JNX7	Enoyl-CoA hydratase/isomerase family protein OS=Medicago truncatula GN=MTR_4g122220 PE=4 SV=1	0	9.233	13.0268	2	2	2	1	261	28.6	9.19	High	Not Found	Not Found	Not Found	Not Found	High	Not Found	Not Found		0	0.311	8.11	2
High	Master Protein	A2Q5C6	Generic methyltransferase OS=Medicago truncatula GN=MTR_7g076170 PE=4 SV=1	0	48.538	13.0094	8	16	4	1	638	73	7.31	Medium	High	High	High	High	Not Found	Not Found	Not Found	Deamidated [Q576]	0	0.947	58.49	8
High	Master Protein	G7JBD0	Phytoene dehydrogenase/chromoplastic protein OS=Medicago truncatula GN=MTR_3g084830 PE=4 SV=1	0	18.465	13.0024	5	11	5	1	423	46.8	7.46	High	High	High	High	High	High	Not Found	Not Found		0	0.638	33.56	5
High	Master Protein	Q2HV13	Lipid transfer protein OS=Medicago truncatula GN=MTR_2g026930 PE=4 SV=1	0	10.142	13	2	4	2	1	200	20.5	8.78	High	High	High	Not Found	Not Found	Not Found	Not Found	Not Found		0	1.154	14.96	2
High	Master Protein	A0A072VQU1	1,2-dihydroxy-3-keto-5-methylthiopentene dioxygenase OS=Medicago truncatula GN=MTR_1g102870 PE=3 SV=1	0	11.19	13	3	4	3	1	200	23.5	5.39	Not Found	Not Found	Not Found	Medium	High	Not Found	High	Not Found		0	0.778	14.89	3
High	Master Protein	G7KGF6	Zincin-like metalloprotease family protein OS=Medicago truncatula GN=MTR_5g030940 PE=3 SV=2	0	35.796	12.9771	8	11	8	1	786	88.7	6.28	Not Found	Not Found	High	High	High	High	High	Not Found		0	0.416	41.85	8
High	Master Protein	G7L754	Pectin acetylesterase OS=Medicago truncatula GN=MTR_8g072000 PE=3 SV=2	0	11.196	12.9717	4	5	4	1	424	47.1	8.19	Not Found	High	High	High	High	Not Found	Not Found	High		0	0.445	14.59	4
High	Master Protein	G7JB42	Cellulose synthase OS=Medicago truncatula GN=MTR_3g107520 PE=3 SV=1	0	91.098	12.9715	12	19	11	1	1087	122.7	6.98	Not Found	High	High	High	High	High	High	Not Found		0	0.575	101.05	12
High	Master Protein	G7IR70	Ubiquitinyl hydrolase 1 OS=Medicago truncatula GN=MTR_2g081180 PE=3 SV=2	0	33.37	12.9676	8	10	8	1	802	88.9	5.07	High	High	High	Not Found	High	High	High	Not Found		0	0.445	32.84	8
High	Master Protein	I3STZ6	Transmembrane protein, putative OS=Medicago truncatula GN=MTR_4g089080 PE=2 SV=1	0	8.24	12.9534	2	3	2	1	193	20.6	8.31	Not Found	Not Found	Not Found	High	High	Not Found	Not Found	Not Found		0	0.292	9.76	2
High	Master Protein	G7K1X5	EF hand calcium-binding family protein OS=Medicago truncatula GN=MTR_5g079340 PE=4 SV=1	0	8.337	12.9496	1	1	1	1	139	15.8	4.7	Not Found	Not Found	Not Found	Not Found	Not Found	High	Not Found	Not Found		0	0.334	4.7	1
High	Master Protein	G7IFU0	Cofilin/actin-depolymerizing factor-like protein OS=Medicago truncatula GN=MTR_2g028670 PE=2 SV=1	0	4.846	12.9496	1	1	1	1	139	16.1	6.57	Not Found	Not Found	Not Found	Not Found	High	Not Found	Not Found	Not Found		0	0.292	4.89	1
High	Master Protein	A0A072TLJ4	Protein ROOT HAIR DEFECTIVE 3 homolog OS=Medicago truncatula GN=MTR_8g016310 PE=3 SV=1	0	60.917	12.9426	8	19	7	1	819	91	5.91	High	High	High	High	High	Not Found	High	Not Found		0	0.695	69	8
High	Master Protein	G7LFT6	Zn-dependent alcohol dehydrogenase family protein OS=Medicago truncatula GN=MTR_8g095220 PE=4 SV=1	0	23.011	12.9412	4	5	4	1	425	45.6	7.91	High	Not Found	Not Found	High	High	Not Found	Not Found	Not Found		0	0.616	18.45	4
High	Master Protein	G7I9J5	Transmembrane protein, putative OS=Medicago truncatula GN=MTR_1g095490 PE=4 SV=1	0	10.901	12.9338	2	3	2	1	317	35.3	7.77	Medium	Not Found	Not Found	Not Found	Not Found	High	High	Not Found		0	0.425	14.25	2
High	Master Protein	G7LBH4	Aspartate-semialdehyde dehydrogenase OS=Medicago truncatula GN=MTR_8g105860 PE=3 SV=1	0	11.911	12.9288	4	6	4	1	379	41.4	6.29	Not Found	Not Found	High	Not Found	High	High	Not Found	High		0	0.369	20.65	4
High	Master Protein	G7JMM6	26S proteasome non-ATPase regulatory subunit 6 OS=Medicago truncatula GN=MTR_4g104080 PE=4 SV=1	0	21.964	12.9199	5	11	5	1	387	44.7	5.59	High	High	High	Not Found	Not Found	High	High	Not Found		0	0.817	32.49	5
High	Master Protein	G7J6L9	Glycoside hydrolase family 3 protein OS=Medicago truncatula GN=MTR_3g079750 PE=4 SV=1	0	27.266	12.9187	6	9	5	1	627	68.4	8.7	Not Found	High	High	High	High	Not Found	Not Found	Not Found		0	0.655	28.82	6
High	Master Protein	A0A072TJK9	Structural constituent of cell wall protein, putative OS=Medicago truncatula GN=MTR_0004s0130 PE=4 SV=1	0	31.512	12.9032	5	7	5	1	527	57.9	6.54	Not Found	High	Not Found	High	High	High	Not Found	Not Found		0	0.487	23.8	5
High	Master Protein	A2Q4U9	C2 OS=Medicago truncatula GN=MTR_7g092770 PE=4 SV=1	0	50.645	12.9032	7	15	1	1	775	89.4	9.1	High	High	High	High	High	Not Found	Not Found	Not Found		0	0.506	62.35	7
High	Master Protein	G7JTJ9	Peptidylprolyl isomerase OS=Medicago truncatula GN=MTR_4g039430 PE=2 SV=1	0	19.012	12.9032	4	4	4	1	372	42.8	5.68	Medium	Not Found	Not Found	Not Found	High	High	Not Found	Not Found		0	0.585	14.19	4
High	Master Protein	G7JHA6	2Fe-2S ferredoxin superfamily protein OS=Medicago truncatula GN=MTR_4g053120 PE=2 SV=2	0	10.382	12.9032	1	1	1	1	155	16.4	4.86	Not Found	Not Found	Not Found	Not Found	Not Found	High	Not Found	Not Found		0	0.259	5.58	1
High	Master Protein	G7II85	Molecular chaperone Hsp40/DnaJ family protein OS=Medicago truncatula GN=MTR_2g104030 PE=3 SV=1	0	26.345	12.9032	5	6	5	1	496	53.4	8.48	Not Found	Not Found	High	Not Found	High	High	Not Found	Not Found		0	0.468	26.43	5
High	Master Protein	G7J8C0	Puromycin-sensitive aminopeptidase-like protein OS=Medicago truncatula GN=MTR_3g104720 PE=4 SV=1	0	45.241	12.8995	8	14	8	1	876	98.9	5.69	High	High	High	High	Medium	High	Not Found	Not Found		0	0.429	50.57	8
High	Master Protein	G7JL78	Glycoprotein 3-alpha-L-fucosyltransferase A OS=Medicago truncatula GN=MTR_4g086010 PE=3 SV=1	0	19.024	12.8968	5	6	5	1	504	56.6	6.86	Not Found	Not Found	High	High	High	High	High	Not Found		0	0.377	21.04	5
High	Master Protein	G7IEZ8	Chalcone-flavonone isomerase family protein OS=Medicago truncatula GN=MTR_1g115840 PE=2 SV=1	0	9.157	12.8889	3	4	3	1	225	25.1	5.76	Not Found	Not Found	High	High	Not Found	Not Found	Not Found	Not Found		0	0.468	14.54	3
High	Master Protein	A0A072VR13	Phosphatidylinositol-3,4,5-trisphosphate 3-phosphatase OS=Medicago truncatula GN=MTR_1g107540 PE=4 SV=1	0	36.072	12.8824	5	5	5	1	621	68.3	5.91	Not Found	Not Found	High	Not Found	High	High	High	Not Found		0	0.343	22.68	5
High	Master Protein	G7KFG8	Calmodulin-domain kinase CDPK protein OS=Medicago truncatula GN=MTR_5g099240 PE=4 SV=1	0	37.617	12.8801	6	12	6	1	559	62.9	6.06	Not Found	Not Found	High	High	High	High	High	Not Found		0	0.719	50.25	6
High	Master Protein	G7IS29	Lipoxygenase OS=Medicago truncatula GN=MTR_2g099560 PE=3 SV=1	0	35.576	12.8621	10	19	4	1	863	96.9	6.28	High	High	High	High	High	High	Not Found	Not Found	Deamidated [Q791; R792]	0	0.487	46.86	10
High	Master Protein	A0A072U8D8	Long chain base biosynthesis 2a-like protein OS=Medicago truncatula GN=MTR_6g033290 PE=3 SV=1	0	41.828	12.8571	4	10	4	1	490	54.1	8.31	Medium	High	High	High	High	Not Found	Not Found	Not Found		0	0.63	45.55	4
High	Master Protein	G7K0S3	30S ribosomal protein S9P OS=Medicago truncatula GN=MTR_5g075240 PE=3 SV=1	0	4.351	12.8571	2	6	1	1	140	16.1	10.2	High	High	High	High	Not Found	Not Found	Not Found	Not Found		0	0.668	13.24	2
High	Master Protein	Q2HU25	Dihydrolipoamide dehydrogenase OS=Medicago truncatula GN=MTR_2g034580 PE=4 SV=1	0	23.136	12.8521	6	6	3	1	568	60.4	6.96	Not Found	Not Found	High	Not Found	Not Found	Not Found	High	Not Found		0	0.54	22.13	6
High	Master Protein	G7LB82	Proteasome subunit alpha type OS=Medicago truncatula GN=MTR_8g075320 PE=2 SV=1	0	7.461	12.8514	2	3	2	1	249	27.1	7.44	High	Not Found	High	High	Not Found	Not Found	Not Found	Not Found		0	0.359	12.66	2
High	Master Protein	B7FMV8	Ubiquitin-conjugating enzyme E2 OS=Medicago truncatula GN=MTR_3g062450 PE=2 SV=1	0	5.668	12.8378	2	3	1	1	148	16.5	7.88	Not Found	Not Found	Medium	High	Not Found	Not Found	Not Found	Not Found		0	1.683	9.02	2
High	Master Protein	Q8GSL6	Farnesyl-diphosphate farnesyltransferase OS=Medicago truncatula GN=sqs1 PE=2 SV=1	0	31.461	12.8329	7	14	7	1	413	47	7.64	High	Not Found	High	High	High	High	High	Not Found		0	0.931	40.03	7
High	Master Protein	B7FKV4	Acetamidase/formamidase, putative OS=Medicago truncatula GN=MTR_4g095660 PE=2 SV=1	0	19.164	12.8319	5	8	2	1	452	49.8	5.53	Not Found	Not Found	High	Medium	High	Not Found	Not Found	Not Found		0	0.468	23.65	5
High	Master Protein	G7IF89	Heat shock factor-binding protein OS=Medicago truncatula GN=MTR_1g088760 PE=4 SV=2	0	11.486	12.8205	2	3	2	1	117	13.1	4.45	Not Found	Not Found	Not Found	High	Not Found	High	Not Found	Not Found		0	0.778	11.89	2
High	Master Protein	G7KPK4	Cytochrome b5-like heme/steroid-binding domain protein OS=Medicago truncatula GN=MTR_6g027160 PE=3 SV=1	0	8.353	12.8205	2	2	2	1	195	21.9	5.01	High	Not Found	Not Found	Not Found	High	Not Found	Not Found	Not Found		0	0.585	6.84	2
High	Master Protein	G7L8V9	Glutelin type-B-like protein OS=Medicago truncatula GN=MTR_8g088860 PE=2 SV=2	0	15.56	12.8134	3	6	3	1	359	38.9	5.76	High	High	High	High	High	Not Found	Not Found	Not Found		0	0.369	25.49	3
High	Master Protein	Q5QQ34	Coatomer epsilon subunit OS=Medicago truncatula GN=cope1 PE=2 SV=1	0	20.933	12.8028	3	7	3	1	289	32	5.16	Not Found	Not Found	High	High	High	Not Found	Not Found	Not Found		0	0.585	28.25	3
High	Master Protein	G7J8L3	MLO-like protein OS=Medicago truncatula GN=MLO PE=3 SV=1	0	42.983	12.766	4	8	4	1	517	58.4	8.95	Not Found	High	High	High	Not Found	Not Found	High	Not Found		0	0.778	40.57	4
High	Master Protein	G7JT77	Transmembrane-like protein OS=Medicago truncatula GN=MTR_4g126790 PE=2 SV=1	0	4.767	12.7451	1	2	1	1	102	11.2	6.25	Not Found	Not Found	Not Found	Not Found	High	High	Not Found	Not Found		0	0.468	8.88	1
High	Master Protein	G7I544	ABC1 family protein OS=Medicago truncatula GN=MTR_1g008980 PE=4 SV=2	0	32.34	12.7404	8	12	8	1	832	92.7	8.24	High	High	High	Not Found	Not Found	High	High	Not Found	Phospho [S381]; Carboxymethyl [K474]	1	0.398	45.19	8
High	Master Protein	G7LIM1	Calcium ion-binding protein OS=Medicago truncatula GN=MTR_8g085780 PE=4 SV=1	0	38.684	12.74	8	9	8	1	573	66	8.4	Not Found	High	High	High	High	High	Not Found	Not Found		0	0.951	32.06	8
High	Master Protein	G7I667	Ammonium transporter OS=Medicago truncatula GN=MTR_1g079760 PE=3 SV=2	0	28.596	12.7168	6	19	6	1	519	55.4	6.79	High	High	Not Found	High	High	High	Not Found	High	Phospho [T499; S500; S502; S504]	0	1.239	50.28	6
High	Master Protein	G7J3T3	Peroxisomal ABC transporter OS=Medicago truncatula GN=MTR_3g087350 PE=4 SV=2	0	79.815	12.715	13	26	13	1	1337	150.3	8.98	High	High	High	High	High	High	High	Not Found		0	0.594	101.42	13
High	Master Protein	G7K465	LRR ribonuclease inhibitor domain protein OS=Medicago truncatula GN=MTR_5g035590 PE=4 SV=1	0	44.239	12.7063	5	7	5	1	606	64.9	8.62	High	High	Not Found	Not Found	Not Found	High	High	Not Found		0	0.369	33.71	5
High	Master Protein	A0A072TF50	Ribosomal protein S8e family protein OS=Medicago truncatula GN=MTR_0508s0010 PE=4 SV=1	0	8.951	12.6923	3	4	3	1	260	29.7	10.23	Not Found	Not Found	Not Found	High	High	High	Medium	Not Found		0	0.54	12.88	3
High	Master Protein	A0A072VPX6	Cytochrome P450 family flavone synthase OS=Medicago truncatula GN=MTR_1g107295 PE=3 SV=1	0	25.194	12.6894	7	17	6	1	528	60.4	7.72	High	High	High	High	High	High	High	Not Found		0	0.931	51.01	7
High	Master Protein	G7I9N7	Glutamyl-tRNA(Gln) amidotransferase subunit C, chloroplastic/mitochondrial OS=Medicago truncatula GN=GATC PE=3 SV=1	0	5.617	12.6866	1	1	1	1	134	14.9	6.79	Not Found	Not Found	Not Found	Not Found	High	Not Found	Not Found	Not Found		0	0.389	5.72	1
High	Master Protein	G7J2W0	26S proteasome non-ATPase regulatory subunit-like protein OS=Medicago truncatula GN=MTR_3g109300 PE=4 SV=1	0	28.067	12.6677	7	8	5	1	671	75.2	7.93	Not Found	Not Found	High	High	Not Found	High	High	Not Found		0	0.468	24.66	7
High	Master Protein	G7LBC1	S-adenosylmethionine carrier protein OS=Medicago truncatula GN=MTR_8g092080 PE=3 SV=1	0	3.591	12.6543	3	5	2	1	324	34.8	9.57	Medium	Not Found	Not Found	Not Found	Not Found	High	Not Found	Not Found		0	0.54	11.62	3
High	Master Protein	G7ZYK6	Plant/F16B3-5 protein OS=Medicago truncatula GN=MTR_6g016780 PE=4 SV=1	0	9.987	12.6437	4	5	4	1	348	40.2	9.8	High	Not Found	Not Found	Not Found	Not Found	High	High	Not Found		0	0.778	12.31	4
High	Master Protein	G7J7C6	Import inner membrane translocase protein OS=Medicago truncatula GN=MTR_3g080670 PE=3 SV=1	0	4.252	12.6437	1	1	1	1	87	9.5	7.75	Not Found	Not Found	Not Found	Not Found	High	Not Found	Not Found	Not Found		0	0.585	3.31	1
High	Master Protein	G7KLB2	Non-specific serine/threonine protein kinase OS=Medicago truncatula GN=MTR_6g012990 PE=3 SV=1	0	25.712	12.6253	5	6	1	1	499	56.8	8.65	Not Found	Not Found	Not Found	Not Found	Not Found	Not Found	High	Not Found		0	0.52	21.74	5
High	Master Protein	G7ISG9	Serine/Threonine-kinase PBS1-like protein OS=Medicago truncatula GN=MTR_2g019990 PE=4 SV=1	0	12.323	12.6233	7	11	5	1	507	56.1	8.88	High	High	High	High	Not Found	High	Not Found	Not Found		0	0.482	24.77	7
High	Master Protein	Q8GSL7	Terpene cyclase/mutase family member OS=Medicago truncatula GN=bas1 PE=2 SV=1	0	34.583	12.5984	10	13	9	1	762	87.4	6.42	Not Found	High	High	High	Not Found	High	High	Not Found		0	0.688	41.28	10
High	Master Protein	G7JEA5	Uncharacterized protein OS=Medicago truncatula GN=MTR_4g129320 PE=2 SV=1	0	4.893	12.5874	2	5	2	1	143	15.9	10.11	High	High	High	High	Not Found	Not Found	Not Found	High		0	0.778	12.41	2
High	Master Protein	G7K140	Malate dehydrogenase OS=Medicago truncatula GN=MTR_5g014710 PE=3 SV=1	0	16.011	12.5698	4	9	2	1	358	38	8.06	High	High	High	High	Not Found	Not Found	Not Found	Not Found		0	0.445	32.73	4
High	Master Protein	G7J3U5	PLAT-plant-stress protein OS=Medicago truncatula GN=MTR_3g087490 PE=2 SV=1	0	8.705	12.5654	2	3	2	1	191	20.8	4.93	Not Found	High	High	High	Not Found	Not Found	Not Found	Not Found		0	0.585	9.44	2
High	Master Protein	G7J867	p-loop nucleoside triphosphate hydrolase superfamily protein OS=Medicago truncatula GN=MTR_3g092080 PE=3 SV=2	0	15.566	12.5641	4	6	1	1	390	43.1	5.54	Not Found	Not Found	Not Found	High	Not Found	Not Found	Not Found	Not Found		0	0.616	17.24	4
High	Master Protein	G7ZUL4	RAB GTPase-like protein A1D OS=Medicago truncatula GN=MTR_2g090865 PE=2 SV=1	0	18.07	12.5581	2	3	1	1	215	24	5.35	Not Found	Not Found	Not Found	Not Found	Not Found	High	Not Found	Not Found		0	0.501	9.74	2
High	Master Protein	A6NA79	Catalytic/protein phosphatase type 2C OS=Medicago truncatula GN=MTR_7g080170 PE=2 SV=1	0	30.485	12.5498	5	6	5	1	502	55.9	6.14	High	Not Found	High	High	High	Not Found	High	Not Found	Phospho [T477]	1	0.484	23.27	5
[truncated: 3,920 more rows]
