# Supplementary material for: Improving the Identification and Coverage of Plant Transmembrane Proteins in Medicago Using Bottom–Up Proteomics
Source: Front Plant Sci. 2020 Dec 18;11:595726. doi: 10.3389/fpls.2020.595726 (PMC7775423; doi:10.3389/fpls.2020.595726)
Supplement: Supplementary file 4 [file Table_4.xlsx]

## Sheet: URTLC 1st
Protein FDR Confidence: Combined	Master	Accession	Description	Exp. q-value: Combined	Sum PEP Score	Coverage [%]	# Peptides	# PSMs	# Unique Peptides	# Protein Groups	# AAs	MW [kDa]	calc. pI	Score Sequest HT: Sequest HT	# Peptides (by Search Engine): Sequest HT	Found in Sample: [S1] F1: Sample	Found in Sample: [S2] F2: Sample	Found in Sample: [S3] F3: Sample	Found in Sample: [S4] F4: Sample	Found in Sample: [S5] F5: Sample	Found in Sample: [S6] F6: Sample	Found in Sample: [S7] F7: Sample	Found in Sample: [S8] F8: Sample	Modifications	Phospho (S; T; Y) Count	Phospho (S; T; Y) Positions	Acetyl (K) Count	Acetyl (K) Positions
High	Master Protein	G7JUD3	Plasma membrane ATPase OS=Medicago truncatula GN=MTR_4g127710 PE=3 SV=1	0	596.769	44	63	324	35	1	952	104.9	6.95	1385.09	63	High	High	High	High	High	High	High	High	Phospho [T884]; Deamidated [R425]	1	Phospho [T884]	0
High	Master Protein	G7KTU9	F0F1-type ATP synthase, beta subunit OS=Medicago truncatula GN=MTR_7g021780 PE=3 SV=2	0	516.733	83	50	309	29	1	598	64.6	6.07	1189.28	50	High	High	High	High	High	High	High	High	Carboxymethyl [C63]; Deamidated [R75; Q280; R291; Q555]	0		0
High	Master Protein	A0A072TYG3	Processing peptidase OS=Medicago truncatula GN=MTR_7g053330 PE=3 SV=1	0	514.343	64	47	236	47	1	532	59.6	6.93	1012.7	47	High	High	High	High	High	High	High	High	Deamidated [R158; Q203; Q257; Q268; Q272; Q313; Q434]; Phospho [T273; T309; T310; T312; S436]	5	Phospho [T273; T309; T310; T312; S436]	0
High	Master Protein	S4T074	Photosystem II CP47 reaction center protein OS=Medicago truncatula GN=psbB PE=3 SV=1	0	451.064	42	33	342	20	1	508	56	6.77	1279.04	33	High	High	High	High	High	High	High	High	Deamidated [Q274; Q277; Q296; R347; Q394; R423; Q425]; Phospho [S297; S299]	2	Phospho [S297; S299]	0
High	Master Protein	A0A072URM9	Archaeal/vacuolar-type H+-ATPase subunit A OS=Medicago truncatula GN=MTR_4g005410 PE=3 SV=1	0	441.116	68	46	178	46	1	624	68.7	5.34	828.3	46	High	High	High	High	High	High	High	High	Deamidated [R48; Q607; R617; R624]	0		0
High	Master Protein	G7JCF5	Translocon at the outer envelope membrane ofs protein 75-III OS=Medicago truncatula GN=MTR_4g064780 PE=4 SV=1	0	428.201	49	40	162	40	1	804	88	7.37	790.54	40	High	High	High	High	High	High	High	High	Deamidated [R626; R799]; Carboxymethyl [C286]	0		0
High	Master Protein	G7KFK1	Translocon at the inner envelope membrane ofs 110 protein OS=Medicago truncatula GN=MTR_5g074690 PE=4 SV=1	0	424.796	51	58	190	57	1	993	109.7	6.34	754.46	58	High	High	High	High	High	High	High	High		0		0
High	Master Protein	G7LGN0	Drug resistance transporter-like ABC domain protein OS=Medicago truncatula GN=MTR_8g014360 PE=3 SV=2	0	403.877	38	71	203	48	1	1480	167.3	7.21	710.7	71	High	High	High	High	High	High	High	High	Deamidated [R229; R236; R855]	0		0
High	Master Protein	G7JKW2	MAR-binding filament-like protein, putative OS=Medicago truncatula GN=MTR_4g054960 PE=4 SV=1	0	401.815	57	53	125	53	1	768	86.7	5.48	544.66	53	High	High	High	High	High	High	High	High		0		0
High	Master Protein	G7JPM2	Uro-adherence factor A, putative OS=Medicago truncatula GN=MTR_4g076030 PE=4 SV=1	0	387.304	54	62	99	62	1	1322	149.6	4.75	424.15	62	High	High	High	High	High	High	High	High		0		0
High	Master Protein	G7L520	Ribulose bisphosphate carboxylase large chain domain protein OS=Medicago truncatula GN=MTR_7g117930 PE=3 SV=1	0	376.505	64	42	330	19	1	475	52.6	6.7	1220.33	42	High	High	High	High	High	High	High	High	Phospho [T31; T246]; Deamidated [R21; Q209; R435; R439; R446]; Carboxymethyl [C284; C427; C459]	0		0
High	Master Protein	A0A072TFS9	ATP synthase F1, alpha subunit OS=Medicago truncatula GN=MTR_0212s0040 PE=3 SV=1	0	367.319	37	45	343	39	1	856	93.2	5.21	1197.24	45	High	High	High	High	High	High	High	High	Deamidated [Q188]	0		0
High	Master Protein	G7LIZ2	Lipoxygenase OS=Medicago truncatula GN=MTR_8g018690 PE=3 SV=1	0	365.38	46	45	161	36	1	865	96.6	6.67	630.45	45	High	High	High	High	High	High	High	High	Deamidated [R233; R246]	0		0
High	Master Protein	A0A072V376	ATP-dependent zinc metalloprotease FTSH protein OS=Medicago truncatula GN=MTR_3g115110 PE=3 SV=1	0	356.812	46	41	218	41	1	706	75.6	5.85	839.26	41	High	High	High	High	High	High	High	High	Deamidated [Q242; Q541; R653; Q665]; Phospho [T247; T250; T546]	3	Phospho [T247; T250; T546]	0
High	Master Protein	G7JCD0	Plasma membrane ATPase OS=Medicago truncatula GN=MTR_3g108800 PE=3 SV=1	0	352.661	42	46	153	22	1	951	104.6	6.83	651.61	46	Not Found	High	High	High	High	High	High	High		0		0
High	Master Protein	A0A072URD6	Plasma membrane ATPase OS=Medicago truncatula GN=MTR_4g107500 PE=3 SV=1	0	348.17	42	47	195	27	1	958	105.5	6.6	743.36	47	High	High	High	High	High	High	High	High		0		0
High	Master Protein	A0A072UZ59	Ribulose bisphosphate carboxylase/oxygenase activase OS=Medicago truncatula GN=MTR_3g068030 PE=4 SV=1	0	344.912	59	37	210	21	1	436	47.9	7.33	842.57	37	High	High	High	High	High	High	High	High	Deamidated [Q175; R278; R297; Q386; Q428]; Phospho [S173]	1	Phospho [S173]	0
High	Master Protein	G7K259	Clathrin heavy chain OS=Medicago truncatula GN=MTR_5g082900 PE=3 SV=1	0	343.89	29	44	105	15	1	1706	193.2	5.44	457.57	44	Not Found	High	High	High	High	High	High	High		0		0
High	Master Protein	G7KYU2	Porin/voltage-dependent anion-selective channel protein OS=Medicago truncatula GN=MTR_7g009330 PE=4 SV=1	0	338.867	81	26	176	25	1	277	29.6	8.88	860.96	26	High	High	High	High	High	High	High	High	Deamidated [Q60; R210; Q219]	0		0
High	Master Protein	A0A072UX22	NAD-dependent epimerase/dehydratase family protein OS=Medicago truncatula GN=MTR_4g068970 PE=4 SV=1	0	336.4	46	24	94	24	1	641	68	5.67	542.27	24	High	High	High	High	High	High	High	High	Deamidated [Q506]	0		0
High	Master Protein	A0A072UAG3	Oxidoreductase/transition metal ion-binding protein, putative OS=Medicago truncatula GN=MTR_6g053740 PE=4 SV=1	0	332.562	48	41	94	41	1	957	105.5	4.86	434.74	41	High	High	High	High	High	High	High	High		0		0
High	Master Protein	A0A072V1W7	Calnexin 2 OS=Medicago truncatula GN=MTR_3g098430 PE=3 SV=1	0	326.949	49	35	166	32	1	546	62.2	4.81	744.26	35	High	High	High	High	High	High	High	High	Carboxymethyl [C112]	0		0
High	Master Protein	I3S1P8	Porin/voltage-dependent anion-selective channel protein OS=Medicago truncatula GN=MTR_6g011390 PE=2 SV=1	0	323.061	78	29	181	26	1	278	30	9.03	834.37	29	High	High	High	High	High	High	High	High	Deamidated [Q59; Q220; R232; Q244]	0		0
High	Master Protein	A0A072UQU8	ATP-dependent zinc metalloprotease FTSH protein OS=Medicago truncatula GN=MTR_4g094662 PE=3 SV=1	0	320.938	46	43	203	27	1	694	74.5	5.57	805.99	43	High	High	High	High	High	High	High	High	Deamidated [Q396; R630]; Phospho [S398; S632]	2	Phospho [S398; S632]	0
High	Master Protein	G7L840	Import component Toc86/159, G and M domain protein OS=Medicago truncatula GN=MTR_8g088370 PE=4 SV=1	0	319.727	32	37	110	37	1	1387	149.3	4.41	459	37	High	High	High	High	High	High	High	High		0		0
High	Master Protein	G7JA79	Rhodanese/cell cycle control phosphatase superfamily protein OS=Medicago truncatula GN=MTR_3g084030 PE=4 SV=2	0	318.434	24	36	133	36	1	1378	151.3	8.81	552.42	36	High	High	High	High	High	High	High	High	Deamidated [Q1346; R1348; Q1351]	0		0
High	Master Protein	G7K2D0	Photosystem I reaction center subunit II OS=Medicago truncatula GN=MTR_5g006130 PE=2 SV=1	0	316.531	73	27	305	27	1	209	23	9.57	1081.07	27	High	High	High	High	High	High	High	High	Carboxymethyl [C136]; Deamidated [Q152; R155; Q163; Q181; Q185; R188; Q205]; Phospho [T202]	1	Phospho [T202]	0
High	Master Protein	G7IP56	Multidrug resistance protein ABC transporter family protein OS=Medicago truncatula GN=MTR_2g019020 PE=4 SV=2	0	314.85	26	40	101	37	1	1619	181	6.61	432.7	40	High	High	High	High	High	High	High	High	Deamidated [R509; R1105]	0		0
High	Master Protein	G7JBT5	Clathrin heavy chain OS=Medicago truncatula GN=MTR_3g070940 PE=3 SV=2	0	314.247	26	42	105	12	1	1705	193	5.5	429.82	42	Not Found	High	High	High	High	High	High	High	Deamidated [Q110]	0		0
High	Master Protein	G7IMF5	Drug resistance transporter-like ABC domain protein OS=Medicago truncatula GN=MTR_2g102670 PE=3 SV=1	0	312.26	31	50	145	6	1	1410	158.3	7.09	562.81	50	Not Found	High	High	High	High	Not Found	High	High	Deamidated [R55; R57; Q225; R226]	0		0
High	Master Protein	A0A072TYR3	Thylakoid rhodanese-like protein OS=Medicago truncatula GN=MTR_8g027835 PE=4 SV=1	0	309.451	54	32	208	32	1	482	50.9	5.21	903.39	32	High	High	High	High	High	High	High	High	Deamidated [Q154; Q333]	0		0
High	Master Protein	S4T0X8	ATP synthase subunit alpha OS=Medicago truncatula GN=atpA PE=3 SV=1	0	308.108	51	32	319	16	1	511	55.8	5.41	1108.12	32	High	High	High	High	High	High	High	High	Deamidated [Q97; R119; Q208]; Phospho [S205]	1	Phospho [S205]	0
High	Master Protein	A0A072V2V0	ATP-dependent Clp protease ATP-binding subunit OS=Medicago truncatula GN=MTR_3g498725 PE=3 SV=1	0	305.058	41	43	115	14	1	922	102.7	6.77	449	43	High	High	High	High	High	High	High	High		0		0
High	Master Protein	G7J0Z5	Photosystem I P700 chlorophyll A apoprotein A2 OS=Medicago truncatula GN=MTR_3g035600 PE=3 SV=2	0	293.647	20	33	322	10	1	1503	167.9	7.28	949.2	33	High	High	High	High	High	High	High	High	Deamidated [Q49; Q779; Q783; Q1221; Q1230; Q1233]; Phospho [S1234]; Carboxymethyl [C597]	1	Phospho [S1234]	0
High	Master Protein	G7K2J4	Porin/voltage-dependent anion-selective channel protein OS=Medicago truncatula GN=MTR_5g015580 PE=2 SV=1	0	287.381	81	26	140	25	1	276	29.5	9.41	630.57	26	High	High	High	High	High	High	High	High		0		0
High	Master Protein	Q1SKX2	70 kDa heat shock protein OS=Medicago truncatula GN=MTR_2g005690 PE=3 SV=1	0	285.495	51	44	109	42	1	707	75.7	5.34	405.89	44	High	High	High	High	High	High	High	High	Deamidated [R115; Q119; Q217; R218]	0		0
High	Master Protein	G7KTM5	Carbohydrate-binding-like fold protein OS=Medicago truncatula GN=MTR_7g109730 PE=4 SV=2	0	282.674	37	41	103	41	1	1196	130.4	6.06	422.56	41	Not Found	High	High	High	High	High	High	High	Carboxymethyl [C72; C142]	0		0
High	Master Protein	A0A072UYN5	Hydroxyproline-rich glycoprotein family protein OS=Medicago truncatula GN=MTR_3g063200 PE=4 SV=1	0	282.174	43	23	100	23	1	435	47.3	6.09	487.24	23	High	High	High	High	High	High	High	High	Deamidated [Q235; R255; Q262]; Phospho [S223; S229; T233]	3	Phospho [S223; S229; T233]	0
High	Master Protein	S4T093	Photosystem II CP43 reaction center protein OS=Medicago truncatula GN=psbC PE=3 SV=1	0	281.873	36	27	203	27	1	473	51.9	7.21	790.08	27	High	High	High	High	High	High	High	High	Deamidated [Q332; R370; Q385; Q388; R423]; Phospho [T335]	1	Phospho [T335]	0
High	Master Protein	G7LAF4	Inner membrane protein OS=Medicago truncatula GN=MTR_8g091480 PE=3 SV=2	0	281.867	50	30	69	30	1	764	84.5	5.94	350.91	30	High	High	High	High	High	High	High	High	Deamidated [Q366]	0		0
High	Master Protein	A0A072V0J2	Protein disulfide-isomerase OS=Medicago truncatula GN=MTR_3g088220 PE=3 SV=1	0	281.244	67	39	112	37	1	513	57	5.1	430.06	39	High	High	High	High	High	High	High	High		0		0
High	Master Protein	S4T063	Hypothetical chloroplast RF1 OS=Medicago truncatula GN=ycf1 PE=4 SV=1	0	279.624	24	55	121	34	1	1756	210.6	9.38	398.05	55	High	High	High	High	High	High	High	High		0		0
High	Master Protein	A0A072TV12	Heat shock cognate 70 kDa-like protein OS=Medicago truncatula GN=MTR_8g099945 PE=3 SV=1	0	278.368	44	39	121	8	1	669	73.6	5.12	457.51	39	High	High	Medium	High	High	High	High	High	Deamidated [Q65; Q379; Q380]	0		0
High	Master Protein	A0A072W1H5	ATP synthase subunit beta OS=Medicago truncatula GN=MTR_1g108765 PE=3 SV=1	0	274.129	59	27	118	25	1	559	59.9	6.15	512.46	27	High	High	High	High	High	High	High	High	Deamidated [R266; Q359]	0		0
High	Master Protein	G7IMF4	Drug resistance transporter-like ABC domain protein OS=Medicago truncatula GN=MTR_2g102660 PE=3 SV=1	0	267.703	29	47	135	3	1	1427	160.4	6.89	499	47	Not Found	High	High	Not Found	Not Found	Not Found	Not Found	Not Found	Deamidated [R55; R57; Q225; R226]	0		0
High	Master Protein	Q2HT97	Heat shock cognate 70 kDa protein OS=Medicago truncatula GN=MTR_7g099680 PE=3 SV=1	0	264.921	51	33	112	11	1	649	71	5.22	485.42	33	Not Found	Not Found	High	High	High	High	High	High	Deamidated [Q158; R159]; Carboxymethyl [C366]	0		0
High	Master Protein	G7JCF2	Plastid transcriptionally active protein OS=Medicago truncatula GN=MTR_4g064750 PE=4 SV=2	0	263.138	56	34	124	34	1	553	59.9	8.24	477.69	34	High	High	High	High	High	High	High	High	Deamidated [R95]; Phospho [T491]	1	Phospho [T491]	0
High	Master Protein	G7I7Q4	Heat shock protein 81-2 OS=Medicago truncatula GN=MTR_1g025430 PE=3 SV=1	0	261.865	45	46	114	44	1	818	94.1	4.89	404.81	46	High	High	High	High	High	High	High	High	Deamidated [R354]	0		0
High	Master Protein	S4SZZ8	Cytochrome f OS=Medicago truncatula GN=petA PE=3 SV=1	0	260.859	55	30	203	30	1	320	35.3	8.56	807.08	30	High	High	High	High	High	High	High	High	Deamidated [Q138; R189]	0		0
High	Master Protein	A0A072VDB9	Gamma carbonic anhydrase-like protein OS=Medicago truncatula GN=MTR_3g112020 PE=4 SV=1	0	253.419	72	19	73	18	1	272	29.3	6.81	408.86	19	High	High	High	High	High	High	High	High		0		0
High	Master Protein	A0A072TUS4	Heat shock 70 kDa protein OS=Medicago truncatula GN=MTR_8g099795 PE=3 SV=1	0	252.302	39	35	113	4	1	668	73.7	5.19	429.31	35	High	Not Found	High	Not Found	Not Found	High	High	High	Deamidated [Q65; Q379; Q380]	0		0
High	Master Protein	G7KXT9	Heat shock cognate 70 kDa protein OS=Medicago truncatula GN=MTR_7g024580 PE=3 SV=1	0	249.323	45	32	110	6	1	649	71	5.19	455.94	32	Not Found	Not Found	Not Found	High	High	High	High	High	Deamidated [Q158; R159]; Carboxymethyl [C366]	0		0
High	Master Protein	G7JAI2	ATP synthase, F0 subunit B OS=Medicago truncatula GN=MTR_3g106820 PE=2 SV=1	0	248.514	52	18	112	18	1	209	23	5.8	626.53	18	High	High	High	High	High	High	High	High	Deamidated [Q129; R135; Q172; Q192; Q198]	0		0
High	Master Protein	A0A0C3UMZ7	L-galactono-1,4-lactone dehydrogenase OS=Medicago truncatula GN=MTR_1g050360 PE=4 SV=2	0	247.587	48	30	117	30	1	603	68.9	8.54	469.78	30	High	High	High	High	High	High	High	High	Deamidated [R158]	0		0
High	Master Protein	A0A072VJR8	60S ribosomal L4-like protein OS=Medicago truncatula GN=MTR_1g066990 PE=4 SV=1	0	243.108	62	33	137	12	1	405	44.6	10.37	526.41	33	High	High	High	High	High	High	High	High	Deamidated [R147; Q304]	0		0
High	Master Protein	G7LIT0	ATP-dependent Clp protease ATP-binding subunit OS=Medicago truncatula GN=MTR_8g100040 PE=3 SV=1	0	241.791	39	39	107	5	1	926	102.7	6.87	414.28	39	Not Found	Not Found	High	High	High	High	High	High		0		0
High	Master Protein	A0A072V7S2	ATP-dependent zinc metalloprotease FTSH protein OS=Medicago truncatula GN=MTR_2g438140 PE=3 SV=1	0	241.323	48	39	148	25	1	690	74.1	6.44	567.47	39	High	High	High	High	High	High	High	High		0		0
High	Master Protein	G7KYC0	Glyceraldehyde-3-phosphate dehydrogenase OS=Medicago truncatula GN=MTR_7g084800 PE=3 SV=1	0	239.785	58	25	159	17	1	404	43	8.27	646.17	25	High	High	High	High	High	High	High	High	Deamidated [R331]	0		0
High	Master Protein	G7J2M9	CBS/octicosapeptide/phox/Bemp1 (PB1) domain protein OS=Medicago truncatula GN=MTR_3g097010 PE=4 SV=1	0	237.009	58	25	82	20	1	519	55.8	6.71	377.69	25	High	High	High	High	High	High	High	High	Deamidated [Q29; Q399; R429; R431]	0		0
High	Master Protein	A0A072TZG2	Potassium efflux antiporter OS=Medicago truncatula GN=MTR_8g031550 PE=4 SV=1	0	235.138	28	31	72	1	1	1174	126.1	5.02	301.88	31	Not Found	Not Found	Not Found	Not Found	High	Not Found	Not Found	Not Found		0		0
High	Master Protein	G7I9M9	ATP synthase D chain OS=Medicago truncatula GN=MTR_1g095830 PE=2 SV=1	0	234.763	92	34	162	34	1	177	21	5.57	631.96	34	High	High	High	High	High	High	High	High		0		0
High	Master Protein	A0A072UFC0	Haloacid dehalogenase-like hydrolase family protein OS=Medicago truncatula GN=MTR_7g112140 PE=4 SV=1	0	232.789	37	34	84	34	1	1081	118	5.87	330.01	34	Not Found	High	High	High	High	High	High	High		0		0
High	Master Protein	A0A072TLZ7	Lipoxygenase OS=Medicago truncatula GN=MTR_8g018735 PE=3 SV=1	0	227.607	49	35	99	20	1	865	96.9	6.37	390.7	35	Medium	High	High	High	High	High	High	High	Deamidated [Q486]	0		0
High	Master Protein	A0A072VE74	Plasma membrane ATPase OS=Medicago truncatula GN=MTR_1g009760 PE=3 SV=1	0	227.492	36	34	120	9	1	951	104.7	7.58	457.37	34	Medium	Not Found	High	High	High	High	High	High		0		0
High	Master Protein	A0A072TP16	Potassium efflux antiporter OS=Medicago truncatula GN=MTR_8g031550 PE=4 SV=1	0	226.546	28	31	72	1	1	1140	122.5	5.06	294.95	31	Not Found	Not Found	Not Found	High	Not Found	Not Found	Not Found	Not Found		0		0
High	Master Protein	A0A072U3K0	Legumin A2 OS=Medicago truncatula GN=MTR_7g097000 PE=3 SV=1	0	226.198	49	30	106	19	1	531	60.8	7.03	436.51	30	High	High	High	High	High	High	High	High	Carboxymethyl [C432]	0		0
High	Master Protein	G7L7C9	Processing peptidase OS=Medicago truncatula GN=MTR_8g102230 PE=3 SV=1	0	225.766	41	24	100	23	1	510	54.9	6.05	427.34	24	High	High	High	High	High	High	High	High	Deamidated [R448; Q449]	0		0
High	Master Protein	B7FMW0	40S ribosomal protein S8 OS=Medicago truncatula GN=MTR_7g053450 PE=2 SV=1	0	223.949	57	21	78	8	1	217	24.7	10.37	373.86	21	High	High	High	High	High	High	High	High	Deamidated [Q104]; Phospho [S100]	1	Phospho [S100]	0
High	Master Protein	Q2HW16	Cupin, RmlC-type OS=Medicago truncatula GN=MTR_7g079820 PE=4 SV=1	0	223.453	61	30	93	5	1	471	53.7	5.9	352.86	30	Not Found	High	High	High	High	Not Found	High	High	Deamidated [R54; R113; R314; Q399; R400]	0		0
High	Master Protein	Q2HW18	Cupin, RmlC-type OS=Medicago truncatula GN=MTR_7g079780 PE=4 SV=1	0	223.157	67	29	91	4	1	464	53.2	5.8	356.44	29	Not Found	High	Not Found	High	High	Not Found	High	Not Found	Deamidated [R55; R114; R307; Q392; R393; Q406; Q408]	0		0
High	Master Protein	G7L0M8	Endoplasmic reticulum [ER]-type calcium ATPase, putative OS=Medicago truncatula GN=MTR_7g100110 PE=3 SV=2	0	221.757	32	36	80	35	1	1072	117.7	5.4	318.27	36	High	High	High	High	High	High	High	High	Carboxymethyl [C955]	0		0
High	Master Protein	G7JNF5	L-ascorbate peroxidase OS=Medicago truncatula GN=MTR_4g073410 PE=2 SV=1	0	219.896	59	25	129	23	1	287	31.7	6.74	555.84	25	High	High	High	High	High	High	High	High	Deamidated [R60]	0		0
High	Master Protein	A0A072VM58	Oligosaccharyltransferase subunit ribophorin II OS=Medicago truncatula GN=MTR_1g069780 PE=4 SV=1	0	218.726	49	30	84	30	1	689	74.7	7.74	333.31	30	High	High	High	High	High	High	High	High		0		0
High	Master Protein	G7JIL4	V-type proton ATPase subunit a OS=Medicago truncatula GN=MTR_4g071070 PE=3 SV=1	0	218.372	34	27	108	26	1	822	92.7	6.18	386.66	27	High	High	High	High	High	High	High	High	Deamidated [Q222; Q370]	0		0
High	Master Protein	A0A072UL44	Heat shock cognate 70 kDa protein OS=Medicago truncatula GN=MTR_4g063710 PE=3 SV=1	0	218.047	44	29	94	2	1	649	71	5.21	387.38	29	Not Found	Not Found	High	Not Found	High	High	Not Found	Not Found	Deamidated [Q158; R159]; Carboxymethyl [C366]	0		0
High	Master Protein	G7KWU8	Heat shock cognate 70 kDa protein OS=Medicago truncatula GN=MTR_7g024390 PE=3 SV=1	0	217.633	40	27	98	1	1	648	70.9	5.19	408.8	27	Not Found	Not Found	High	Not Found	Not Found	Not Found	Not Found	Not Found	Deamidated [Q158; R159]; Carboxymethyl [C366]	0		0
High	Master Protein	G7I836	Mitochondrial Rho GTPase OS=Medicago truncatula GN=MTR_1g082870 PE=3 SV=1	0	216.847	38	23	80	23	1	646	71.7	5.53	360.29	23	High	High	High	High	High	High	High	High	Deamidated [R305; Q309]	0		0
High	Master Protein	A0A072UTX7	Patellin-like protein OS=Medicago truncatula GN=MTR_4g033435 PE=4 SV=1	0	216.615	59	34	90	31	1	595	66.2	4.74	371.61	34	High	High	High	High	High	High	High	High		0		0
High	Master Protein	G7J9S7	Translocon at the inner envelope membrane ofs protein 55-II OS=Medicago truncatula GN=MTR_3g105820 PE=4 SV=1	0	216.513	49	31	104	31	1	552	62	8.7	377.17	31	High	High	High	High	High	High	High	High	Carboxymethyl [C334]	0		0
High	Master Protein	G7J8R4	NADH-ubiquinone oxidoreductase 75 kDa subunit OS=Medicago truncatula GN=MTR_3g065130 PE=3 SV=1	0	213.892	48	25	57	25	1	739	80.7	7.36	285.38	25	High	Not Found	High	High	High	High	High	High	Carboxymethyl [C89]; Deamidated [Q87]	0		0
High	Master Protein	Q2HW53	Ferredoxin-dependent glutamate synthase OS=Medicago truncatula GN=MTR_7g089970 PE=4 SV=1	0	213.629	26	32	66	32	1	1612	175.7	6.86	266.68	32	High	High	High	High	High	High	High	High	Deamidated [Q1023]	0		0
High	Master Protein	A0A072V195	ATP-dependent Clp protease ATP-binding subunit OS=Medicago truncatula GN=MTR_3g102830 PE=3 SV=1	0	213.415	35	34	88	2	1	927	103	6.84	329.87	34	Not Found	Not Found	Not Found	High	Not Found	Not Found	High	Not Found		0		0
High	Master Protein	A0A072UDP2	Legumin A2 OS=Medicago truncatula GN=MTR_7g096990 PE=4 SV=1	0	212.153	49	24	88	13	1	525	60.4	6.96	353.95	24	High	High	High	High	High	High	High	High	Deamidated [Q286; Q367; R370]; Carboxymethyl [C426]	0		0
High	Master Protein	A0A072V9Z1	Peroxisomal (S)-2-hydroxy-acid oxidase GLO1 OS=Medicago truncatula GN=MTR_2g070420 PE=3 SV=1	0	211.872	68	28	98	28	1	372	40.8	9.13	374.36	28	High	High	High	High	High	High	High	High	Deamidated [R258]	0		0
High	Master Protein	A0A072VPD1	Vicilin 47 kDa protein OS=Medicago truncatula GN=MTR_1g103400 PE=4 SV=1	0	211.544	42	29	93	26	1	667	78.2	7.84	365.11	29	Medium	High	High	High	High	High	High	High	Deamidated [R266]	0		0
High	Master Protein	G7KGT1	Ribulose bisphosphate carboxylase/oxygenase activase OS=Medicago truncatula GN=MTR_5g080450 PE=4 SV=1	0	209.651	50	30	103	8	1	476	52.3	6.46	372.78	30	High	High	High	High	Not Found	Not Found	High	High	Deamidated [Q175; Q403; Q405; R410; Q428]; Phospho [S173]	1	Phospho [S173]	0
High	Master Protein	G7ZVI4	Photosystem II oxygen-evolving enhancer protein OS=Medicago truncatula GN=MTR_8g078870 PE=4 SV=1	0	209.075	65	20	119	10	1	329	35	6.62	558.5	20	High	High	High	High	High	High	High	High	Deamidated [Q155; Q213; R260]; Carboxymethyl [C110]; Phospho [T104; T106; T112; S217; S222; S224]	6	Phospho [T104; T106; T112; S217; S222; S224]	0
High	Master Protein	G7JW95	Ferredoxin--NADP reductase OS=Medicago truncatula GN=MTR_5g022300 PE=3 SV=1	0	209.043	56	28	120	28	1	361	40.3	8.21	471.92	28	High	High	High	High	High	High	High	High		0		0
High	Master Protein	A0A072VDW9	TCP-1/cpn60 chaperonin family protein OS=Medicago truncatula GN=MTR_1g017390 PE=3 SV=1	0	207.291	55	33	94	2	1	591	62.6	5.87	381.66	33	Not Found	Not Found	High	High	High	Not Found	Not Found	High		0		0
High	Master Protein	G7IT85	Phosphoglycerate kinase OS=Medicago truncatula GN=MTR_2g066110 PE=3 SV=1	0	206.516	55	27	69	24	1	479	50	7.14	300.55	27	High	High	High	High	High	High	High	High		0		0
High	Master Protein	A0A072VEG8	TCP-1/cpn60 chaperonin family protein OS=Medicago truncatula GN=MTR_1g017380 PE=3 SV=1	0	204.976	55	33	95	2	1	591	62.7	5.76	377.02	33	High	Not Found	High	High	High	Not Found	Not Found	Not Found		0		0
High	Master Protein	G7JR15	ABC transporter B family protein OS=Medicago truncatula GN=MTR_4g124040 PE=4 SV=1	0	204.576	34	39	72	31	1	1333	144	7.71	268.57	39	Not Found	High	High	High	High	High	High	High	Deamidated [Q566; Q571]	0		0
High	Master Protein	G7I9Z0	Glycine dehydrogenase [decarboxylating] protein OS=Medicago truncatula GN=MTR_1g016230 PE=3 SV=1	0	203.979	30	27	63	27	1	1056	114.6	7.31	301.29	27	High	High	High	High	High	High	High	High	Carboxymethyl [C899]	0		0
High	Master Protein	A0A072VAE0	Lipoxygenase OS=Medicago truncatula GN=MTR_3g081130 PE=3 SV=1	0	202.951	43	33	74	31	1	858	97.3	6.55	288.47	33	High	High	High	High	High	High	High	High		0		0
High	Master Protein	G7I6N5	60S ribosomal L4-like protein OS=Medicago truncatula GN=MTR_1g045410 PE=4 SV=1	0	202.845	56	31	94	8	1	406	44.7	10.43	353.74	31	Not Found	Not Found	High	High	High	Not Found	High	High		0		0
High	Master Protein	I3SKN7	RuBisCO large subunit-binding protein OS=Medicago truncatula GN=MTR_4g057970 PE=2 SV=1	0	202.614	45	29	85	27	1	587	61.9	5.16	318.64	29	High	High	High	High	High	High	High	High		0		0
High	Master Protein	I3SIG9	Chlorophyll a-b binding protein, chloroplastic OS=Medicago truncatula GN=MTR_4g094605 PE=2 SV=1	0	202.499	48	13	229	6	1	266	28.3	5.66	910.75	13	High	High	High	High	High	High	High	High	Deamidated [Q25; R96]; Phospho [T21; S23; S45]	0		0
High	Master Protein	A0A072UM13	Heat shock cognate 70 kDa protein OS=Medicago truncatula GN=MTR_4g063720 PE=3 SV=1	0	200.673	40	27	87	1	1	649	71	5.15	360.14	27	Not Found	High	Not Found	Not Found	Not Found	Not Found	Not Found	Not Found	Deamidated [Q158; R159]; Carboxymethyl [C366]	0		0
High	Master Protein	B7FH09	DREPP plasma membrane protein OS=Medicago truncatula GN=MTR_2g437530 PE=2 SV=1	0	200.215	74	23	64	23	1	214	23.8	4.92	270.25	23	High	High	High	High	High	High	High	High		0		0
High	Master Protein	G7J5Z1	Dolichyl-diphosphooligosaccharide--protein glycosyltransferase subunit 1 OS=Medicago truncatula GN=MTR_3g115980 PE=3 SV=2	0	200.129	43	26	76	25	1	617	69.6	7.72	326.38	26	High	High	High	High	High	High	High	High		0		0
High	Master Protein	G7JYS0	Phospholipase D OS=Medicago truncatula GN=MTR_5g023050 PE=3 SV=2	0	199.298	36	32	76	31	1	872	98.6	6.98	311.97	32	Not Found	High	High	High	High	High	High	High	Deamidated [Q742; R743]; Carboxymethyl [C397]	0		0
High	Master Protein	G7LJD5	Phototropin-2 protein OS=Medicago truncatula GN=MTR_8g070530 PE=4 SV=2	0	199.208	38	35	60	35	1	935	104.8	7.53	251.03	35	High	High	High	High	High	High	High	High		0		0
High	Master Protein	G7I7H7	Thylakoid lumen 18.3 kDa protein OS=Medicago truncatula GN=MTR_1g082420 PE=4 SV=1	0	198.238	47	18	127	18	1	289	31.4	7.33	488.59	18	High	High	High	High	High	High	High	High		0		0
High	Master Protein	G7L0I7	Cobalamin-independent methionine synthase OS=Medicago truncatula GN=MTR_7g086300 PE=3 SV=1	0	197.729	30	23	63	21	1	803	88.8	6.6	284.04	23	High	High	High	High	High	High	High	High		0		0
High	Master Protein	I3T3T7	40S ribosomal protein S8 OS=Medicago truncatula GN=MTR_8g012325 PE=2 SV=1	0	196.674	55	18	74	5	1	215	24.6	10.32	344.95	18	High	High	High	High	High	High	High	High	Deamidated [Q104]; Phospho [S100]	1	Phospho [S100]	0
High	Master Protein	B5BLW2	Carotenoid cleavage dioxygenase OS=Medicago truncatula GN=ccd1 PE=2 SV=1	0	195.577	64	29	71	29	1	540	60.9	6.79	315.82	29	High	High	High	High	High	High	High	High	Deamidated [Q518; R519]	0		0
High	Master Protein	Q2HW21	Cupin, RmlC-type OS=Medicago truncatula GN=MTR_7g079740 PE=4 SV=1	0	193.293	59	26	83	3	1	473	54.2	5.94	317.14	26	High	High	Not Found	Not Found	High	High	High	High	Deamidated [R54; R316; Q401; R402; Q415; Q417]	0		0
High	Master Protein	G7K4R2	Heat shock protein 81-2 OS=Medicago truncatula GN=MTR_5g096430 PE=3 SV=1	0	192.112	39	30	90	22	1	699	80.1	5.03	320.82	30	Not Found	High	High	High	High	High	High	High		0		0
High	Master Protein	A0A072U9H4	Chlorophyll a-b binding protein, chloroplastic OS=Medicago truncatula GN=MTR_6g060175 PE=3 SV=1	0	191.56	46	17	136	17	1	289	31	6	551.64	17	High	High	High	High	High	High	High	High	Deamidated [Q120]	0		0
High	Master Protein	G7LIY0	Lipoxygenase OS=Medicago truncatula GN=MTR_8g018550 PE=3 SV=1	0	191.372	34	30	74	19	1	868	97.7	6.29	275.12	30	High	Not Found	High	High	High	High	High	High		0		0
High	Master Protein	A0A072U0Q0	Fasciclin-like arabinogalactan protein OS=Medicago truncatula GN=MTR_7g075453 PE=4 SV=1	0	191.367	38	19	92	19	1	418	42.9	6.3	413	19	High	High	High	High	High	High	High	High	Deamidated [Q249]	0		0
High	Master Protein	G7J4Y2	Thylakoid-bound ascorbate peroxidase OS=Medicago truncatula GN=MTR_3g088160 PE=3 SV=1	0	191.138	47	26	129	26	1	436	47.4	8.95	465.59	26	High	High	High	High	High	High	High	High	Deamidated [R150]	0		0
High	Master Protein	G7IED3	FZO-like protein OS=Medicago truncatula GN=MTR_1g072270 PE=4 SV=1	0	190.382	38	32	63	32	1	914	101.6	5.24	239.45	32	High	High	High	High	High	High	High	High		0		0
High	Master Protein	G7J9N5	SPFH domain/band 7 family protein OS=Medicago truncatula GN=MTR_3g093220 PE=4 SV=1	0	190.148	54	24	61	24	1	400	43.4	8.44	293.98	24	High	High	High	High	High	High	High	High	Deamidated [R298; Q302; R381]	0		0
High	Master Protein	Q1RSH4	GroEL-like chaperone, ATPase OS=Medicago truncatula GN=MTR_1g090130 PE=3 SV=1	0	185.674	43	25	70	5	1	576	61.1	6.62	293.67	25	Not Found	High	High	High	High	High	High	High	Deamidated [Q239]	0		0
High	Master Protein	G7JT26	Extracellular calcium sensing receptor OS=Medicago truncatula GN=MTR_4g112530 PE=4 SV=2	0	183.605	53	20	123	20	1	392	41.6	9.51	499.01	20	High	High	High	High	High	High	High	High	Deamidated [Q140; Q144; Q151]	0		0
High	Master Protein	A0A072V3A8	Catalase OS=Medicago truncatula GN=MTR_3g115370 PE=3 SV=1	0	183.25	42	26	131	26	1	492	56.7	7.3	468.15	26	High	High	High	High	High	High	High	High		0		0
High	Master Protein	A0A072U6I0	SPFH/band 7/PHB domain membrane-associated family protein OS=Medicago truncatula GN=MTR_6g011380 PE=4 SV=1	0	182.659	60	31	115	24	1	286	31.3	5.43	472.44	31	High	High	High	High	High	High	High	High		0		0
High	Master Protein	Q1RSH3	GroEL-like chaperone, ATPase OS=Medicago truncatula GN=MTR_1g090140 PE=3 SV=1	0	182.469	41	24	67	4	1	574	61.1	6.09	288.43	24	Not Found	High	High	High	Not Found	Not Found	High	High	Deamidated [Q239]	0		0
High	Master Protein	B6DXD7	Vacuolar H+-translocating inorganic pyrophosphatase OS=Medicago truncatula GN=VP1 PE=2 SV=1	0	181.966	22	21	126	20	1	765	80.1	5.27	489.79	21	High	High	High	High	High	High	High	High		0		0
High	Master Protein	A0A072TKG8	Ribulose bisphosphate carboxylase large chain domain protein OS=Medicago truncatula GN=MTR_0002s0660 PE=3 SV=1	0	181.131	47	27	194	6	1	479	53	6.68	646.44	27	Medium	Not Found	Medium	High	High	High	High	High	Deamidated [R41; Q209; R435; R439]; Carboxymethyl [C284; C427]	0		0
High	Master Protein	G7JML2	Glyceraldehyde-3-phosphate dehydrogenase OS=Medicago truncatula GN=MTR_4g103920 PE=3 SV=1	0	179.971	64	24	97	15	1	339	36.6	7.05	344.47	24	High	High	High	High	High	High	High	High		0		0
High	Master Protein	G7JBI2	ATP-dependent zinc metalloprotease FTSH-like protein OS=Medicago truncatula GN=MTR_3g096000 PE=4 SV=2	0	179.382	37	31	66	31	1	838	94	6.1	249.1	31	Not Found	Not Found	High	High	High	High	High	High		0		0
High	Master Protein	G7JSU6	Prohibitin complex protein OS=Medicago truncatula GN=MTR_4g078200 PE=4 SV=1	0	178.695	70	20	91	9	1	293	32.3	9.32	357.95	20	High	High	High	High	High	High	High	High		0		0
High	Master Protein	A0A072U338	Phosphopyruvate hydratase OS=Medicago truncatula GN=MTR_7g103620 PE=3 SV=1	0	178.18	56	19	50	18	1	444	47.8	5.8	236.15	19	Not Found	High	High	High	High	High	High	High	Deamidated [Q418]	0		0
High	Master Protein	B7FHR0	60S ribosomal L4-like protein OS=Medicago truncatula GN=MTR_5g025120 PE=2 SV=1	0	177.225	53	29	88	6	1	408	44.9	10.4	308.55	29	Not Found	Not Found	High	High	High	High	High	High		0		0
High	Master Protein	A0A072VSL4	Archaeal/vacuolar-type H+-ATPase subunit B OS=Medicago truncatula GN=MTR_1g112870 PE=3 SV=1	0	175.841	45	23	72	3	1	489	54.1	5.1	303.65	23	Not Found	Not Found	High	High	High	High	High	High	Deamidated [R137]	0		0
High	Master Protein	B7FIZ5	Chlorophyll a-b binding protein, chloroplastic OS=Medicago truncatula GN=MTR_4g015570 PE=2 SV=1	0	175.681	54	19	204	18	1	289	31.5	6.57	719.02	19	High	High	High	High	High	High	High	High	Deamidated [R112; Q133; R134; Q238]; Phospho [S46; S48; S49; T111; T113]	5	Phospho [S46; S48; S49; T111; T113]	0
High	Master Protein	G7IUC7	Outer membrane OMP85 family protein OS=Medicago truncatula GN=MTR_2g098110 PE=4 SV=1	0	174.032	48	27	61	27	1	672	73	8.56	230.96	27	High	High	High	High	High	High	High	High	Carboxymethyl [C465]	0		0
High	Master Protein	G7JD38	Xylose isomerase OS=Medicago truncatula GN=MTR_4g128840 PE=3 SV=2	0	173.062	45	23	70	22	1	480	54.2	6.44	274.42	23	High	High	High	High	High	High	High	High	Deamidated [Q174]	0		0
High	Master Protein	G7JJ96	Aminomethyltransferase OS=Medicago truncatula GN=MTR_4g132360 PE=3 SV=1	0	172.324	55	26	112	26	1	433	47.3	9.06	414.95	26	High	High	High	High	High	High	High	High	Carboxymethyl [C113; C246; C385]	0		0
High	Master Protein	Q2HW22	Cupin, RmlC-type OS=Medicago truncatula GN=MTR_7g079730 PE=4 SV=1	0	171.414	52	28	78	10	1	464	53.1	5.53	287.72	28	Not Found	High	High	Not Found	High	High	High	High	Deamidated [R54; R113; R307]	0		0
High	Master Protein	G7JYP4	Vacuolar protein sorting protein OS=Medicago truncatula GN=MTR_5g013780 PE=4 SV=2	0	171.338	10	36	54	36	1	4324	484.9	5.88	184.98	36	Not Found	High	High	High	High	High	High	High		0		0
High	Master Protein	A0A072V9X9	Callose synthase-like protein OS=Medicago truncatula GN=MTR_3g075180 PE=4 SV=1	0	170.59	18	33	59	29	1	1908	217.6	8.65	227.91	33	Not Found	Not Found	High	High	High	High	High	High	Deamidated [Q1887]	0		0
High	Master Protein	A0A072VFT5	Protein ROOT HAIR DEFECTIVE 3 homolog OS=Medicago truncatula GN=MTR_2g029340 PE=3 SV=1	0	170.502	35	25	63	24	1	833	93	5.67	276.01	25	High	High	High	High	High	High	High	High	Deamidated [R405]	0		0
High	Master Protein	A0A072TS91	Carnitine/acylcarnitine carrier-like protein OS=Medicago truncatula GN=MTR_8g066975 PE=3 SV=1	0	169.979	54	20	99	16	1	297	30.7	9.35	417.9	20	High	High	High	High	High	High	High	High	Deamidated [Q33]	0		0
High	Master Protein	Q93YX8	Phosphoinositide phospholipase C OS=Medicago truncatula GN=PLC1 PE=4 SV=1	0	169.325	39	26	88	12	1	593	67.4	6.37	336.52	26	Medium	High	High	High	High	High	High	High		0		0
High	Master Protein	G7IYN4	Disease resistance protein (CC-NBS-LRR class) family protein OS=Medicago truncatula GN=MTR_3g013790 PE=3 SV=1	0	168.469	21	30	52	30	1	1280	146	5.68	201.44	30	Not Found	High	High	High	High	High	High	High		0		0
High	Master Protein	A0A072VRY1	Callose synthase-like protein OS=Medicago truncatula GN=MTR_1g116470 PE=4 SV=1	0	167.57	17	30	72	25	1	1897	218.3	8.68	282.35	30	High	High	High	High	High	High	High	High		0		0
High	Master Protein	G7KSI7	Archaeal/vacuolar-type H+-ATPase subunit B OS=Medicago truncatula GN=MTR_7g081010 PE=3 SV=1	0	166.99	45	22	65	2	1	487	54.1	5.15	283.52	22	Not Found	Not Found	High	High	Not Found	Not Found	Not Found	Not Found	Deamidated [R136]	0		0
High	Master Protein	G7IEG7	Legumin storage protein OS=Medicago truncatula GN=MTR_1g072600 PE=3 SV=1	0	166.632	43	23	111	2	1	583	67.2	6.95	444.76	23	Not Found	High	Not Found	Not Found	High	High	High	High	Deamidated [R72; R559; Q581]; Carboxymethyl [C107; C411]; Phospho [S103; T400]	2	Phospho [S103; T400]	0
High	Master Protein	G7JAX4	Actin 2 OS=Medicago truncatula GN=MTR_3g095530 PE=2 SV=2	0	166.148	57	21	75	8	1	377	41.7	5.49	311.66	21	Not Found	High	High	High	High	High	High	High		0		0
High	Master Protein	A0A072VJ28	Glucan synthase-like protein OS=Medicago truncatula GN=MTR_2g061380 PE=4 SV=1	0	165.463	15	29	50	22	1	1945	224.5	9.09	189.34	29	High	High	High	High	High	High	High	High		0		0
High	Master Protein	A0A072US24	DIL domain myosin family protein OS=Medicago truncatula GN=MTR_4g125690 PE=3 SV=1	0	165.16	24	31	52	28	1	1530	172.5	8.57	199.05	31	High	High	High	High	High	High	High	High		0		0
High	Master Protein	G7KMR3	Ribulose bisphosphate carboxylase small chain OS=Medicago truncatula GN=MTR_6g018300 PE=3 SV=1	0	164.715	55	15	92	3	1	177	19.8	8.54	385.55	15	Not Found	Not Found	Not Found	High	High	High	High	High	Deamidated [R107; R162]; Carboxymethyl [C95]	0		0
High	Master Protein	G7LAL7	40S ribosomal protein S2-4 OS=Medicago truncatula GN=MTR_8g105340 PE=3 SV=1	0	164.431	47	20	68	2	1	279	30.4	10.32	255.33	20	Not Found	Not Found	Not Found	High	High	High	High	High		0		0
High	Master Protein	A0A072U1R9	Calmodulin-domain kinase CDPK protein OS=Medicago truncatula GN=MTR_7g091890 PE=4 SV=1	0	163.953	31	22	61	13	1	533	60.6	6.6	250.59	22	High	High	High	High	High	High	High	High		0		0
High	Master Protein	G7JVH4	Porin/voltage-dependent anion-selective channel protein OS=Medicago truncatula GN=MTR_4g128300 PE=4 SV=1	0	163.668	68	20	81	19	1	279	30	9.17	337.94	20	High	High	High	High	High	High	High	High		0		0
High	Master Protein	G7JQ33	Drug resistance transporter-like ABC domain protein OS=Medicago truncatula GN=MTR_4g123850 PE=3 SV=2	0	163.61	21	36	70	34	1	1431	162	7.88	231.62	36	High	High	High	High	High	High	High	High	Deamidated [R1074]	0		0
High	Master Protein	G7IAZ5	Pti1-like kinase OS=Medicago truncatula GN=MTR_1g116520 PE=3 SV=2	0	163.529	54	22	67	21	1	403	44.8	8.63	280.76	22	High	High	High	High	High	High	High	High		0		0
High	Master Protein	G7IRB6	Proton pump interactor, putative OS=Medicago truncatula GN=MTR_2g085330 PE=4 SV=2	0	163.358	40	30	58	30	1	674	75.8	8.87	229.89	30	High	High	High	High	High	High	High	High		0		0
High	Master Protein	G7IBS1	Receptor-like kinase OS=Medicago truncatula GN=MTR_1g086230 PE=3 SV=1	0	162.375	45	18	57	16	1	476	52	8	245.93	18	High	High	High	High	High	High	High	High	Deamidated [R271]	0		0
High	Master Protein	A0A072VT43	Translation elongation factor EF-2 subunit OS=Medicago truncatula GN=MTR_1g048000 PE=4 SV=1	0	161.952	41	31	54	10	1	843	94.1	6.2	201.96	31	High	Not Found	Not Found	High	High	Not Found	Not Found	Not Found	Carboxymethyl [C370]	0		0
High	Master Protein	B7FJH0	Prohibitin complex protein OS=Medicago truncatula GN=MTR_3g008250 PE=2 SV=1	0	158.128	68	18	75	12	1	278	30.3	8.88	298.61	18	High	High	High	High	High	High	High	High	Deamidated [Q38; R39]	0		0
High	Master Protein	A0A072TKG5	ATP synthase subunit alpha OS=Medicago truncatula GN=MTR_0002s0550 PE=3 SV=1	0	157.999	25	15	159	2	1	504	55.1	6.48	549.39	15	High	High	High	High	High	High	High	High	Deamidated [Q97]	0		0
High	Master Protein	G7KDP1	ABC transporter B family-like protein OS=Medicago truncatula GN=MTR_5g029750 PE=4 SV=1	0	155.845	26	29	52	28	1	1234	135.2	9	216.03	29	High	High	High	High	High	High	High	High	Deamidated [Q1168]	0		0
High	Master Protein	A0A072TMC9	Starch synthase, chloroplastic/amyloplastic OS=Medicago truncatula GN=MTR_8g024340 PE=3 SV=1	0	154.515	38	19	44	15	1	616	67.8	8.38	195.7	19	High	High	High	High	High	High	High	High	Deamidated [R125]	0		0
High	Master Protein	A0A072VM16	Prohibitin complex protein OS=Medicago truncatula GN=MTR_2g090760 PE=4 SV=1	0	154.493	59	19	84	9	1	287	31.4	9.64	334.25	19	Not Found	High	High	High	High	High	High	High		0		0
High	Master Protein	G7KN61	Elongation factor 1-alpha OS=Medicago truncatula GN=MTR_6g021800 PE=3 SV=2	0	153.729	31	20	84	7	1	447	49.2	9.07	348.5	20	Not Found	Not Found	High	High	High	High	High	High		0		0
High	Master Protein	A0A072V2Z0	ER membrane protein complex subunit-like protein OS=Medicago truncatula GN=MTR_3g110140 PE=4 SV=1	0	152.638	27	27	74	27	1	983	110.2	6.79	238.4	27	Not Found	High	High	High	High	High	High	High	Deamidated [Q261]	0		0
High	Master Protein	G7IBR0	ABC transporter B family protein OS=Medicago truncatula GN=MTR_1g086080 PE=4 SV=1	0	151.555	23	21	28	17	1	1289	139.2	7.77	129.5	21	High	High	High	High	High	High	High	Not Found		0		0
High	Master Protein	G7L7F0	Phosphotransferase OS=Medicago truncatula GN=MTR_8g102460 PE=3 SV=2	0	151.308	47	20	50	16	1	498	53.7	5.57	220.72	20	Not Found	Not Found	Not Found	High	High	High	High	High		0		0
High	Master Protein	G7IJ44	Photosystem II 10 kDa proteinPsbR protein OS=Medicago truncatula GN=MTR_2g064650 PE=2 SV=1	0	150.715	35	8	89	8	1	136	14.1	9.67	429.85	8	High	High	High	High	High	High	High	High	Deamidated [Q75]; Phospho [T51]	1	Phospho [T51]	0
High	Master Protein	B7FL29	40S ribosomal protein S4 OS=Medicago truncatula GN=MTR_5g018940 PE=2 SV=1	0	150.147	68	24	121	12	1	265	29.9	10.23	431.96	24	High	High	High	High	High	High	High	High	Deamidated [Q211; R221]	0		0
High	Master Protein	G7LGJ8	Calnexin 2 OS=Medicago truncatula GN=MTR_8g095680 PE=3 SV=1	0	150.021	34	18	42	15	1	540	61.8	4.97	192.07	18	High	High	High	High	High	High	High	High	Carboxymethyl [C115]	0		0
High	Master Protein	G7LGQ5	Processing peptidase OS=Medicago truncatula GN=MTR_8g014660 PE=3 SV=1	0	149.614	34	21	59	20	1	507	54.8	5.55	226.48	21	High	High	High	High	High	High	High	High		0		0
High	Master Protein	G7JU59	LRR receptor-like kinase OS=Medicago truncatula GN=MTR_4g113100 PE=4 SV=1	0	149.375	31	23	57	19	1	655	71.4	8.56	198.71	23	High	High	High	High	High	High	High	High	Deamidated [R506]	0		0
High	Master Protein	G7K1D4	Carbonic anhydrase OS=Medicago truncatula GN=MTR_5g034250 PE=3 SV=1	0	147.795	41	12	45	12	1	278	30.4	6.54	205.85	12	High	High	High	High	High	High	High	High	Deamidated [R73; Q123]; Carboxymethyl [C115]; Phospho [S117]	1	Phospho [S117]	0
High	Master Protein	S4T086	ATP synthase CF0 B subunit OS=Medicago truncatula GN=atpF PE=3 SV=1	0	147.677	53	14	90	14	1	184	21.1	6.58	375.47	14	High	High	High	High	High	High	High	High	Deamidated [R65; R71; R94; R96; R105]	0		0
High	Master Protein	G7IBL3	Syntaxin of plants protein OS=Medicago truncatula GN=MTR_1g066460 PE=3 SV=1	0	147.512	60	20	64	20	1	265	29.9	5.4	251.95	20	High	High	High	High	High	High	High	High		0		0
High	Master Protein	A9YWS0	Serine hydroxymethyltransferase OS=Medicago truncatula GN=MTR_5g030950 PE=3 SV=1	0	147.079	51	23	61	23	1	518	57.4	8.31	220.93	23	High	High	High	High	High	High	High	High		0		0
High	Master Protein	A0A072U5R4	Chlorophyll a-b binding protein, chloroplastic OS=Medicago truncatula GN=MTR_6g011890 PE=3 SV=1	0	146.796	40	12	142	4	1	265	28.3	5.66	536.94	12	High	High	Not Found	High	High	High	High	High	Deamidated [R54; R95]	0		0
High	Master Protein	G7IS30	Lipoxygenase OS=Medicago truncatula GN=MTR_2g099570 PE=3 SV=1	0	146.76	32	26	52	23	1	861	97.3	6.54	177.83	26	Not Found	High	High	High	High	High	High	High		0		0
High	Master Protein	G7JUV4	ATP-dependent zinc metalloprotease FTSH protein OS=Medicago truncatula GN=MTR_4g064350 PE=3 SV=1	0	146.685	27	20	52	18	1	807	89.2	6.71	210.07	20	Not Found	High	High	High	High	High	High	High		0		0
High	Master Protein	G7J6P5	LysM receptor kinase K1B OS=Medicago truncatula GN=MTR_3g080050 PE=4 SV=2	0	144.993	27	17	55	16	1	621	68	5.81	242.42	17	Not Found	High	High	High	High	High	High	High		0		0
High	Master Protein	G7KTI5	Villin OS=Medicago truncatula GN=MTR_7g091460 PE=4 SV=2	0	144.055	26	22	36	22	1	983	107.6	5.77	133.33	22	High	High	High	High	High	High	High	High	Deamidated [Q178; Q187]	0		0
High	Master Protein	G7J5Y4	Glyceraldehyde-3-phosphate dehydrogenase OS=Medicago truncatula GN=MTR_3g115920 PE=3 SV=1	0	144.037	39	23	107	15	1	451	47.9	7.2	366.93	23	High	High	High	High	High	High	High	High		0		0
High	Master Protein	G7K975	Rieske (2Fe-2S) domain protein OS=Medicago truncatula GN=MTR_5g008750 PE=4 SV=1	0	143.524	52	17	63	17	1	272	30	8.13	237.16	17	High	High	High	High	High	High	High	High		0		0
High	Master Protein	B7FJX5	60S ribosomal protein L5-2 OS=Medicago truncatula GN=MTR_8g028125 PE=2 SV=1	0	143.516	44	20	71	8	1	302	34.5	9.04	279.53	20	High	Not Found	High	High	High	High	High	High		0		0
High	Master Protein	A0A072U6U8	Plant-specific import receptor subunit TOM20 OS=Medicago truncatula GN=MTR_6g024140 PE=4 SV=1	0	143.477	60	11	51	11	1	206	22.8	5.86	270.33	11	High	High	High	High	High	High	High	High		0		0
High	Master Protein	G7JBW9	Outer membrane OMP85 family protein OS=Medicago truncatula GN=MTR_3g071450 PE=4 SV=1	0	143.243	44	26	74	24	1	516	57.7	6.55	282.94	26	High	High	High	High	High	High	High	High		0		0
High	Master Protein	A0A072TWG1	Ribulose bisphosphate carboxylase small chain OS=Medicago truncatula GN=MTR_7g007120 PE=3 SV=1	0	141.468	48	15	88	7	1	181	20.2	8.54	333.97	15	Not Found	High	High	High	High	High	High	High	Deamidated [R111; R166]	0		0
High	Master Protein	G7IF28	Plastid transketolase OS=Medicago truncatula GN=MTR_1g116120 PE=4 SV=1	0	140.343	45	31	87	30	1	735	79.7	6.43	281.17	31	High	High	High	High	High	High	High	High	Deamidated [Q190; R298]	0		0
High	Master Protein	B7FHB2	Ribulose bisphosphate carboxylase small chain OS=Medicago truncatula GN=MTR_6g018310 PE=2 SV=1	0	140.189	54	14	80	2	1	180	20	8.54	327.12	14	Not Found	Not Found	Not Found	Not Found	High	Not Found	Not Found	Not Found	Deamidated [R110; R165]; Carboxymethyl [C98]	0		0
High	Master Protein	G7K5W0	Transporter family ABC domain protein OS=Medicago truncatula GN=MTR_5g075960 PE=4 SV=2	0	140.131	27	17	39	11	1	718	78.7	9.33	163.32	17	Not Found	High	High	High	High	High	Not Found	High		0		0
High	Master Protein	G7K4B9	Glycerophosphoryl diester phosphodiesterase family protein OS=Medicago truncatula GN=MTR_5g094230 PE=4 SV=1	0	140.069	24	15	90	15	1	754	81.3	6.24	326.29	15	High	High	High	High	High	High	High	High	Carboxymethyl [C388]; Deamidated [Q586]	0		0
High	Master Protein	G7KY60	Non-green plastid inner envelope membrane protein OS=Medicago truncatula GN=MTR_7g073340 PE=2 SV=2	0	139.51	33	16	79	16	1	310	33.8	6.62	381.23	16	High	High	High	High	High	High	High	High	Deamidated [Q109; Q113]; Phospho [S112]	1	Phospho [S112]	0
High	Master Protein	I3S1W3	40S ribosomal protein S6 OS=Medicago truncatula GN=MTR_4g088595 PE=2 SV=1	0	139.429	40	19	66	9	1	248	28.2	10.7	266.83	19	High	High	High	High	High	High	High	High		0		0
High	Master Protein	G7IDL5	Acetyl-CoA carboxylase, putative OS=Medicago truncatula GN=MTR_1g071610 PE=4 SV=1	0	139.34	32	16	37	16	1	743	81.8	6.84	167.91	16	Not Found	High	High	High	High	High	High	High		0		0
High	Master Protein	G7KEZ8	Gamma carbonic anhydrase-like protein OS=Medicago truncatula GN=MTR_5g020850 PE=4 SV=1	0	139.122	60	15	44	12	1	270	29.2	6.54	278.84	15	High	High	High	High	High	High	High	High		0		0
High	Master Protein	G7L6W7	Sad1/UNC-like protein OS=Medicago truncatula GN=MTR_8g043510 PE=4 SV=1	0	138.832	39	21	54	21	1	462	50.4	8.16	206.19	21	High	High	High	High	High	High	High	High	Deamidated [R257; R261]	0		0
High	Master Protein	G7IEH0	Glycinin G4 OS=Medicago truncatula GN=MTR_1g072610 PE=3 SV=1	0	138.552	32	20	103	5	1	553	63.5	6.81	379.96	20	Not Found	Not Found	Not Found	High	High	High	High	High	Deamidated [R72; R416; R528]	0		0
High	Master Protein	G7L017	Actin-97 OS=Medicago truncatula GN=MTR_7g026230 PE=3 SV=1	0	138.428	50	16	56	2	1	377	41.8	5.4	241.58	16	Not Found	Not Found	High	High	High	High	Not Found	Not Found		0		0
High	Master Protein	G7KH23	LRR receptor-like kinase OS=Medicago truncatula GN=MTR_5g083910 PE=4 SV=1	0	138.426	26	26	58	19	1	996	110.1	6.37	209.23	26	High	High	High	High	High	High	High	High	Deamidated [Q208]	0		0
High	Master Protein	A0A072UHR4	Thylakoid membrane slr0575-like protein OS=Medicago truncatula GN=MTR_6g017260 PE=4 SV=1	0	138.319	43	14	72	14	1	280	30.6	7.81	255.57	14	High	High	High	High	High	High	High	High	Phospho [S60; S61; T62; T63; T64; S66; S68]; Deamidated [Q67; R202; R203]	0		0
High	Master Protein	A0A072UXN6	Clathrin heavy chain OS=Medicago truncatula GN=MTR_3g464720 PE=3 SV=1	0	137.677	15	25	54	3	1	1704	193	5.48	188.15	25	Not Found	Not Found	Not Found	High	Not Found	Not Found	High	Not Found		0		0
High	Master Protein	A0A072U6K7	Chlorophyll a-b binding protein, chloroplastic OS=Medicago truncatula GN=MTR_6g011880 PE=3 SV=1	0	137.4	58	11	149	6	1	265	28.2	5.43	571.14	11	High	High	High	High	High	High	High	High	Deamidated [R95; Q124]	0		0
High	Master Protein	G7KVE1	Actin-97 OS=Medicago truncatula GN=MTR_7g093260 PE=3 SV=1	0	137.283	50	16	55	2	1	377	41.7	5.49	235.85	16	Not Found	Not Found	Not Found	High	High	Not Found	Not Found	Not Found		0		0
High	Master Protein	A0A072TC88	ATP synthase, F1 beta subunit OS=Medicago truncatula GN=MTR_1829s0010 PE=3 SV=1	0	136.987	46	10	66	2	1	338	37.1	4.96	284.87	10	Not Found	Not Found	Not Found	High	Not Found	High	High	High	Deamidated [Q25; R36]	0		0
High	Master Protein	B7FIH3	Actin-97 OS=Medicago truncatula GN=MTR_0015s0130 PE=2 SV=1	0	136.716	50	16	53	2	1	377	41.6	5.49	227.96	16	Not Found	Not Found	Not Found	High	Not Found	Not Found	Not Found	Not Found		0		0
High	Master Protein	A0A072USS0	Tubulin beta chain OS=Medicago truncatula GN=MTR_4g017630 PE=3 SV=1	0	136.316	41	17	52	6	1	449	50.5	4.83	236.33	17	Not Found	High	High	High	High	High	High	High	Carboxymethyl [C12]; Deamidated [Q94]	0		0
High	Master Protein	G7JFK1	Heat shock 70 kDa protein OS=Medicago truncatula GN=MTR_4g130540 PE=3 SV=1	0	136.057	24	18	69	2	1	653	71.5	5.39	269.88	18	Not Found	Not Found	Not Found	High	High	High	Not Found	Not Found	Deamidated [Q157; R158]; Carboxymethyl [C365]	0		0
High	Master Protein	A0A072VF11	40S ribosomal protein S2-4 OS=Medicago truncatula GN=MTR_1g032450 PE=3 SV=1	0	135.833	48	19	59	1	1	277	30.4	10.32	203.65	19	Not Found	Not Found	Not Found	Not Found	Not Found	Not Found	Not Found	High		0		0
High	Master Protein	A0A072UJW7	Fructose-bisphosphate aldolase OS=Medicago truncatula GN=MTR_4g057670 PE=3 SV=1	0	135.83	47	22	87	21	1	400	43.2	7.3	302.32	22	High	High	High	High	High	High	High	High	Deamidated [R189]	0		0
High	Master Protein	S4SZ10	Protein Ycf2 OS=Medicago truncatula GN=ycf2 PE=3 SV=1	0	135.824	20	38	61	37	1	1885	222.3	8.91	168.67	38	Not Found	High	High	High	High	High	High	High	Deamidated [Q1634; R1638]	0		0
High	Master Protein	G7LHC7	TPR domain kinase OS=Medicago truncatula GN=MTR_8g098370 PE=4 SV=2	0	135.327	38	16	59	12	1	489	54.6	5.58	260.49	16	Not Found	High	High	High	High	High	High	High		0		0
High	Master Protein	G7JU14	Heat shock 70 kDa protein OS=Medicago truncatula GN=MTR_4g092920 PE=3 SV=1	0	134.981	43	25	44	15	1	675	72.3	6.07	160.49	25	Not Found	High	High	High	High	High	High	High		0		0
High	Master Protein	G7IL85	Actin-related protein 4A OS=Medicago truncatula GN=MTR_2g008050 PE=3 SV=1	0	134.899	50	16	57	4	1	377	41.6	5.49	240.55	16	Not Found	High	High	High	High	High	High	High		0		0
High	Master Protein	B7FH20	ATP synthase OS=Medicago truncatula GN=MTR_8g092040 PE=2 SV=1	0	134.767	78	25	76	25	1	244	27.7	8.12	256.29	25	High	High	High	High	High	High	High	High		0		0
High	Master Protein	A0A072UGS7	Calcium-transporting ATPase OS=Medicago truncatula GN=MTR_4g008650 PE=3 SV=1	0	134.527	23	26	71	24	1	1033	113.1	5.72	238.02	26	High	High	High	High	High	High	High	High		0		0
High	Master Protein	G7JVL7	Membrane protein Ycf1, putative OS=Medicago truncatula GN=MTR_4g006080 PE=4 SV=2	0	134.196	22	21	48	1	1	910	108.5	8.85	182.59	21	Not Found	Not Found	Not Found	Not Found	Not Found	Not Found	High	High		0		0
High	Master Protein	G7I6P0	Calcium-binding EF hand protein OS=Medicago truncatula GN=MTR_1g045490 PE=4 SV=2	0	133.905	35	25	45	25	1	800	90	6.48	174.31	25	High	High	High	High	High	High	High	High		0		0
High	Master Protein	A0A072TSK6	Porin/voltage-dependent anion-selective channel protein OS=Medicago truncatula GN=MTR_8g469150 PE=4 SV=1	0	133.545	45	19	99	16	1	278	29.8	7.62	350.76	19	High	High	High	High	High	High	High	High	Deamidated [R78]	0		0
High	Master Protein	A0A072UG84	Embryo defective 3012 protein OS=Medicago truncatula GN=MTR_6g004840 PE=4 SV=1	0	133.138	16	30	60	30	1	1956	214.2	6.25	197.4	30	High	High	High	High	High	High	High	High	Deamidated [Q1839]	0		0
High	Master Protein	G7K9H5	Photosystem II oxygen-evolving enhancer protein OS=Medicago truncatula GN=MTR_5g018670 PE=4 SV=1	0	133.037	54	15	81	5	1	329	34.9	6.39	311.62	15	Not Found	Not Found	Not Found	High	High	High	High	High	Deamidated [R260]	0		0
High	Master Protein	A0A072V7D4	Multidrug resistance protein ABC transporter family protein OS=Medicago truncatula GN=MTR_2g436710 PE=4 SV=1	0	132.618	15	22	55	5	1	1501	168	7.99	198.74	22	Not Found	Not Found	Not Found	High	High	High	High	Not Found	Deamidated [Q1349]	0		0
High	Master Protein	G7IEH2	Legumin storage protein OS=Medicago truncatula GN=MTR_1g072630 PE=3 SV=1	0	132.522	38	17	83	5	1	569	65.3	6.58	339.1	17	High	Not Found	High	High	High	High	High	High	Deamidated [R72]; Carboxymethyl [C107; C395]; Phospho [S103; T384]	2	Phospho [S103; T384]	0
High	Master Protein	G7IBY1	60S ribosomal protein L3B OS=Medicago truncatula GN=MTR_1g098540 PE=3 SV=2	0	132.413	55	31	98	16	1	389	44.5	10.18	289.98	31	High	High	High	High	High	High	High	High	Deamidated [Q272]	0		0
High	Master Protein	A0A072TVN2	Dynamin-like protein 1E OS=Medicago truncatula GN=MTR_8g099550 PE=3 SV=1	0	132.093	36	25	43	15	1	610	68.2	8.03	154.91	25	Not Found	High	Not Found	High	High	High	High	High		0		0
High	Master Protein	G7KFE0	LRR receptor-like kinase OS=Medicago truncatula GN=MTR_5g098970 PE=4 SV=2	0	132.045	36	16	44	16	1	524	59.4	7.01	219.4	16	Not Found	High	High	High	High	High	High	High		0		0
High	Master Protein	G7K0M1	Fasciclin-like arabinogalactan protein OS=Medicago truncatula GN=MTR_5g098420 PE=4 SV=1	0	131.529	35	11	51	11	1	421	45.1	6.34	271.9	11	Not Found	High	High	High	High	High	High	High	Carboxymethyl [C206]; Phospho [S208]	1	Phospho [S208]	0
High	Master Protein	A0A072V5G1	Multidrug resistance protein ABC transporter family protein OS=Medicago truncatula GN=MTR_2g436730 PE=4 SV=1	0	131.462	17	22	53	3	1	1499	167.8	7.78	193.15	22	Not Found	Not Found	Not Found	High	High	Not Found	Not Found	Not Found	Deamidated [Q1347]	0		0
High	Master Protein	A2Q2V1	ATP-citrate lyase/succinyl-CoA ligase OS=Medicago truncatula GN=MTR_2g034090 PE=4 SV=1	0	131.2	39	19	41	19	1	608	65.9	7.72	179.97	19	Not Found	Not Found	High	High	High	High	High	High		0		0
High	Master Protein	A0A072TZF0	Carboxy-terminal region remorin OS=Medicago truncatula GN=MTR_8g031370 PE=4 SV=1	0	130.797	68	18	83	16	1	200	21.6	8.73	329.21	18	High	High	High	High	High	High	High	High	Deamidated [R79]	0		0
High	Master Protein	G7KVS0	E1 subunit-like 2-oxoglutarate dehydrogenase OS=Medicago truncatula GN=MTR_7g023770 PE=4 SV=2	0	130.657	27	27	46	15	1	1023	115.7	6.95	172.61	27	Not Found	High	High	High	High	High	Not Found	High		0		0
High	Master Protein	G7J5Z3	Outer envelope pore protein OS=Medicago truncatula GN=MTR_3g115990 PE=2 SV=1	0	130.521	59	15	39	15	1	178	20.8	9.51	178.61	15	High	High	Not Found	High	High	High	High	High	Deamidated [Q42]	0		0
High	Master Protein	G7IN02	Plasma membrane ATPase OS=Medicago truncatula GN=MTR_2g036650 PE=3 SV=1	0	130.274	25	27	107	4	1	958	105.5	6.98	360.54	27	Not Found	High	Not Found	High	High	High	High	High	Deamidated [R910; Q918]	0		0
High	Master Protein	G7IMV1	Alpha-L-arabinofuranosidase/beta-D-xylosidase OS=Medicago truncatula GN=MTR_2g034720 PE=4 SV=1	0	130.259	30	22	61	22	1	762	82.6	8.47	228.97	22	High	High	High	High	High	High	High	High	Carboxymethyl [C376]; Deamidated [Q190; R197]	0		0
High	Master Protein	B7FN18	Adenylate kinase OS=Medicago truncatula GN=MTR_4g103800 PE=2 SV=1	0	130.183	60	20	69	20	1	243	26.7	7.81	286.12	20	High	High	High	High	High	High	High	High		0		0
High	Master Protein	I3SU63	Fructose-bisphosphate aldolase OS=Medicago truncatula GN=MTR_5g069055 PE=2 SV=1	0	129.718	49	15	41	4	1	358	38.2	6.73	171.81	15	Not Found	Not Found	High	High	High	High	High	High		0		0
High	Master Protein	A0A072UDY2	Presequence protease OS=Medicago truncatula GN=MTR_5g004680 PE=4 SV=1	0	129.082	24	24	44	24	1	1077	120.6	5.55	150.09	24	Not Found	High	High	High	High	High	High	High		0		0
High	Master Protein	A0A072TIB9	Tripeptidyl peptidase II OS=Medicago truncatula GN=MTR_0025s0060 PE=4 SV=1	0	128.694	27	31	46	27	1	1324	146.6	6.04	153.63	31	High	High	High	High	High	High	High	High	Deamidated [Q889]	0		0
High	Master Protein	G7KN93	Cytochrome c1, heme protein OS=Medicago truncatula GN=MTR_6g023230 PE=4 SV=1	0	128.142	44	9	39	6	1	306	33.3	6.62	193.28	9	High	Not Found	Not Found	High	High	High	High	High	Deamidated [Q158; R185; Q189]	0		0
High	Master Protein	G7J7N5	ATP-dependent zinc metalloprotease FTSH protein OS=Medicago truncatula GN=MTR_3g104470 PE=3 SV=1	0	128.051	28	18	39	14	1	707	76.6	8.38	173.52	18	High	High	High	High	High	High	High	High		0		0
High	Master Protein	G7KFV1	UTP-glucose-1-phosphate uridylyltransferase OS=Medicago truncatula GN=MTR_5g077000 PE=4 SV=1	0	127.861	59	21	37	20	1	470	51.4	5.4	155.1	21	Not Found	High	High	High	High	High	High	High		0		0
High	Master Protein	G7IJX0	DUF639 family protein OS=Medicago truncatula GN=MTR_2g007330 PE=4 SV=1	0	127.325	30	21	48	21	1	808	91.5	9.42	192.42	21	Not Found	High	High	High	High	High	High	High	Deamidated [R430]	0		0
High	Master Protein	A0A072TVP5	FTSH extracellular protease family protein OS=Medicago truncatula GN=MTR_8g099605 PE=4 SV=1	0	127.274	29	26	47	26	1	918	103.5	8.5	170.99	26	High	High	High	High	High	High	High	High		0		0
High	Master Protein	A0A072VCE0	Actin-97 OS=Medicago truncatula GN=MTR_2g096840 PE=3 SV=1	0	127.133	50	15	52	1	1	377	41.7	5.49	225.8	15	Not Found	Not Found	Not Found	Not Found	Not Found	Not Found	Not Found	High	Carboxymethyl [C259]; Deamidated [Q265]	0		0
High	Master Protein	A0A072VNG3	Protoporphyrinogen IX oxidase OS=Medicago truncatula GN=MTR_1g085730 PE=4 SV=1	0	126.573	46	17	43	17	1	551	59.4	9.13	169.84	17	Not Found	High	High	High	High	High	High	High	Deamidated [Q254]	0		0
High	Master Protein	G7LA71	Adipocyte plasma membrane-associated-like protein OS=Medicago truncatula GN=MTR_8g074270 PE=4 SV=1	0	126.059	27	13	41	13	1	375	41.4	5.97	189.55	13	Not Found	High	High	High	High	High	High	High	Deamidated [R201]	0		0
High	Master Protein	G7I7V6	Glycerol-3-phosphate dehydrogenase OS=Medicago truncatula GN=MTR_1g050720 PE=3 SV=1	0	125.983	32	19	49	18	1	626	68.2	8.31	206.2	19	Not Found	Not Found	High	High	High	High	High	High		0		0
High	Master Protein	Q2HW19	Cupin, RmlC-type OS=Medicago truncatula GN=MTR_7g079770 PE=4 SV=1	0	125.261	52	22	58	6	1	463	53.1	5.59	212.97	22	High	High	High	High	High	High	High	High	Deamidated [R307]	0		0
High	Master Protein	I3SZG9	Chlorophyll a-b binding protein, chloroplastic OS=Medicago truncatula GN=MTR_5g098785 PE=2 SV=1	0	124.961	46	11	107	11	1	277	29.7	8.25	381.46	11	High	High	High	High	High	High	High	High	Deamidated [Q52; R57; Q58; R109]	0		0
High	Master Protein	G7JAT1	Long-chain-fatty-acid CoA ligase (AMP-forming) OS=Medicago truncatula GN=MTR_3g084450 PE=4 SV=1	0	124.576	29	17	32	17	1	720	80.2	8.72	132.37	17	Not Found	High	High	Not Found	High	High	High	High		0		0
High	Master Protein	G7J8E5	DnaJ heat shock amino-terminal domain protein, putative OS=Medicago truncatula GN=MTR_3g104980 PE=4 SV=1	0	124.12	43	14	55	14	1	211	23.4	4.7	243.58	14	High	High	High	High	High	High	High	High		0		0
High	Master Protein	A0A072VCV1	Phototropin-2 protein OS=Medicago truncatula GN=MTR_2g095980 PE=4 SV=1	0	123.352	23	23	44	23	1	968	109.6	7.46	154.56	23	High	High	High	High	High	High	High	High	Deamidated [Q622]	0		0
High	Master Protein	A0A072V3E2	Senescence-associated E3 ubiquitin ligase OS=Medicago truncatula GN=MTR_3g115670 PE=4 SV=1	0	123.337	22	15	32	15	1	814	89.4	5.4	166.14	15	High	High	High	High	High	High	High	High	Deamidated [Q484; R499; Q504]	0		0
High	Master Protein	A0A072VSU0	ABC transporter B family protein OS=Medicago truncatula GN=MTR_1g115430 PE=4 SV=1	0	123.178	16	17	24	11	1	1395	154.8	6.58	123.33	17	Not Found	High	High	Not Found	Not Found	High	High	High		0		0
High	Master Protein	G7I4U4	Plastid fibrillin OS=Medicago truncatula GN=MTR_1g075660 PE=4 SV=1	0	122.813	52	15	72	15	1	276	29.7	7.44	250.56	15	High	High	High	High	High	High	High	High	Deamidated [Q102; R126; Q128; R130]	0		0
High	Master Protein	G7J9P9	Protein translocase, putative OS=Medicago truncatula GN=MTR_3g093380 PE=4 SV=1	0	122.565	38	14	55	14	1	263	28	9.8	228.84	14	Not Found	Not Found	High	High	High	High	High	High		0		0
High	Master Protein	A0A072U201	Elongation factor Tu OS=Medicago truncatula GN=MTR_7g094460 PE=3 SV=1	0	122.274	43	17	54	15	1	449	48.9	6.87	210.8	17	Not Found	High	High	High	High	High	High	High		0		0
High	Master Protein	B7FJ16	Oxygen-evolving enhancer protein 2-1 OS=Medicago truncatula GN=MTR_3g449930 PE=2 SV=1	0	122.248	43	15	74	15	1	261	28.1	7.84	330	15	High	High	High	High	High	High	High	High		0		0
High	Master Protein	G7LJ01	Acetyltransferase component of pyruvate dehydrogenase complex OS=Medicago truncatula GN=MTR_8g018770 PE=3 SV=1	0	122.067	40	19	41	19	1	543	59.3	7.71	174.44	19	High	High	High	High	High	High	High	High		0		0
High	Master Protein	A2Q5A0	Photosystem II protein D1 OS=Medicago truncatula GN=MTR_7g021750 PE=3 SV=1	0	121.839	27	10	67	10	1	353	39	5.25	292.65	10	High	High	High	High	High	High	High	High	Deamidated [R269; R323]	0		0
High	Master Protein	A0A072U5E1	Plasma membrane ATPase OS=Medicago truncatula GN=MTR_6g011310 PE=3 SV=1	0	121.686	29	27	90	9	1	956	105.4	6.68	279.81	27	Not Found	Not Found	High	High	High	High	High	High		0		0
High	Master Protein	G7JRA2	Tubulin beta chain OS=Medicago truncatula GN=MTR_4g019110 PE=2 SV=1	0	121.679	37	14	54	3	1	449	50.5	4.83	225.48	14	Not Found	High	High	Not Found	High	High	High	High	Deamidated [Q94]	0		0
High	Master Protein	G7JVN6	UDP-glucose:sterol 3-O-glucosyltransferase OS=Medicago truncatula GN=MTR_4g022580 PE=4 SV=1	0	121.241	33	15	38	8	1	623	68.4	6.46	177.23	15	Not Found	Not Found	Not Found	High	High	High	High	High		0		0
High	Master Protein	Q2HUG8	Translocase of chloroplast OS=Medicago truncatula GN=MTR_7g088050 PE=3 SV=1	0	120.888	57	17	53	6	1	332	36.8	9.06	194.6	17	Not Found	High	Not Found	High	High	High	High	High		0		0
High	Master Protein	A0A072V484	Heat shock 70 kDa protein OS=Medicago truncatula GN=MTR_2g010020 PE=3 SV=1	0	120.508	42	24	45	11	1	677	72.5	5.68	146.91	24	Not Found	High	High	High	High	High	High	High		0		0
High	Master Protein	B7FGP1	Ribosomal protein S11 OS=Medicago truncatula GN=MTR_4g096790 PE=2 SV=1	0	120.499	73	11	45	3	1	151	16.3	10.59	193.44	11	Not Found	Not Found	Not Found	High	High	High	High	High		0		0
High	Master Protein	G7LIZ7	Lipoxygenase OS=Medicago truncatula GN=MTR_8g018730 PE=3 SV=2	0	120.353	27	22	63	8	1	864	96.9	6.21	207.47	22	Not Found	Not Found	High	High	High	High	High	High	Deamidated [Q839]	0		0
High	Master Protein	G7LB10	ATP-dependent zinc metalloprotease FTSH protein OS=Medicago truncatula GN=MTR_8g056860 PE=4 SV=1	0	120.229	27	27	42	27	1	988	112.9	6.47	135.05	27	High	High	High	High	High	High	High	High		0		0
High	Master Protein	S4SZ39	Photosystem I P700 chlorophyll a apoprotein A1 OS=Medicago truncatula GN=psaA PE=3 SV=1	0	120.1	17	18	196	1	1	758	84.2	7.42	462.85	18	Not Found	Not Found	Not Found	Not Found	Not Found	Not Found	High	High	Carboxymethyl [C581]; Deamidated [Q33]	0		0
High	Master Protein	A0A072TTP2	Lipoxygenase OS=Medicago truncatula GN=MTR_8g080230 PE=3 SV=1	0	120.068	30	24	46	23	1	916	102.9	7.39	167.71	24	Not Found	High	High	High	High	High	High	High	Deamidated [Q65; R417]	0		0
High	Master Protein	G7KH12	Phosphoinositide phospholipase C OS=Medicago truncatula GN=MTR_5g082620 PE=4 SV=1	0	119.882	40	23	50	22	1	589	66.9	6.54	172.76	23	High	High	High	High	High	High	High	High		0		0
High	Master Protein	G7JM88	Lethal leaf-spot protein, putative OS=Medicago truncatula GN=MTR_4g057200 PE=4 SV=1	0	119.84	29	18	57	17	1	542	61.1	8	211.32	18	High	High	High	High	High	High	High	High		0		0
High	Master Protein	G7J2W4	Myosin heavy chain-like protein OS=Medicago truncatula GN=MTR_3g109330 PE=2 SV=1	0	119.397	48	22	52	22	1	439	49.5	9.41	189.22	22	High	High	High	High	High	High	High	High		0		0
High	Master Protein	G7ICX7	Calcium-dependent phosphotriesterase superfamily protein OS=Medicago truncatula GN=MTR_1g086990 PE=4 SV=1	0	119.296	43	16	32	16	1	327	35.7	8.13	136.63	16	Not Found	High	High	High	High	High	High	High		0		0
High	Master Protein	A0A072VRS6	D-glycerate dehydrogenase/hydroxypyruvate reductase OS=Medicago truncatula GN=MTR_1g112510 PE=3 SV=1	0	119.124	49	16	39	16	1	386	42.2	7.42	167.74	16	Not Found	Not Found	High	High	High	High	High	High		0		0
High	Master Protein	G7JPU2	Serine/Threonine-kinase HT1-like protein OS=Medicago truncatula GN=MTR_4g106980 PE=4 SV=2	0	118.821	39	18	57	12	1	392	43.9	7.61	224.73	18	High	High	High	High	High	High	High	High	Phospho [T64; S65]	2	Phospho [T64; S65]	0
High	Master Protein	Q7X9B3	9/13 hydroperoxide lyase OS=Medicago truncatula GN=hpl1 PE=2 SV=1	0	118.529	37	19	34	19	1	482	53.9	6.61	153.69	19	High	Not Found	High	High	High	High	High	High		0		0
High	Master Protein	G7II05	Drug resistance transporter-like ABC domain protein OS=Medicago truncatula GN=MTR_2g101090 PE=3 SV=2	0	118.513	14	26	66	5	1	1446	163.8	7.81	217.07	26	High	Not Found	Not Found	Not Found	Not Found	Not Found	High	High		0		0
High	Master Protein	A0A072U2G7	NAD-dependent aldehyde dehydrogenase family protein OS=Medicago truncatula GN=MTR_8g064170 PE=3 SV=1	0	118.429	32	21	52	18	1	541	58.6	7.77	172.55	21	High	High	High	High	High	High	High	High	Deamidated [R413]	0		0
High	Master Protein	A0A072V714	Plasma membrane ATPase OS=Medicago truncatula GN=MTR_2g449840 PE=3 SV=1	0	118.257	13	14	64	2	1	903	99	5.73	229.27	14	Not Found	Not Found	Not Found	High	High	High	High	High	Carboxymethyl [C205]; Deamidated [R193; Q197]	0		0
High	Master Protein	G7J588	Tubulin beta chain OS=Medicago truncatula GN=MTR_3g113970 PE=2 SV=1	0	118.094	43	18	57	7	1	450	50.6	4.87	233.32	18	High	High	High	Not Found	High	Not Found	High	High	Carboxymethyl [C25]	0		0
High	Master Protein	G7JB75	Chlorophyll a-b binding protein, chloroplastic OS=Medicago truncatula GN=MTR_3g070340 PE=3 SV=1	0	117.642	35	10	79	9	1	278	30.7	6.01	328.45	10	High	High	High	High	High	High	High	High		0		0
High	Master Protein	G7KKH1	Chlorophyll a-b binding protein, chloroplastic OS=Medicago truncatula GN=MTR_6g012110 PE=3 SV=1	0	117.463	42	10	148	4	1	265	28.3	6.35	489.95	10	High	High	High	High	High	High	High	High	Deamidated [Q48; R95]; Phospho [T42; S45; S47]	0		0
High	Master Protein	A0A072VKS3	1-phosphatidylinositol phosphodiesterase-like protein OS=Medicago truncatula GN=MTR_1g060050 PE=4 SV=1	0	117.119	48	16	53	16	1	317	36.1	7.33	204.86	16	Not Found	High	High	High	High	High	High	High		0		0
High	Master Protein	G7L3V6	ABC transporter B family protein OS=Medicago truncatula GN=MTR_7g102070 PE=4 SV=2	0	116.995	22	24	45	20	1	1338	146.6	7.4	150.63	24	Not Found	High	High	High	High	High	High	High	Phospho [S691; S692]; Deamidated [Q1130; R1131]	2	Phospho [S691; S692]	0
High	Master Protein	G7KEW5	p-loop nucleoside triphosphate hydrolase superfamily protein OS=Medicago truncatula GN=MTR_5g020530 PE=3 SV=1	0	116.978	28	22	41	20	1	630	70.5	9.14	159.75	22	High	High	High	High	High	High	High	High	Deamidated [Q355]	0		0
High	Master Protein	Q84UC1	Glutamine synthetase OS=Medicago truncatula GN=GS2 PE=2 SV=1	0	116.35	34	16	69	16	1	428	47	6.73	240.96	16	High	High	High	High	High	High	High	High	Carboxymethyl [C304]; Deamidated [Q186]	0		0
High	Master Protein	A2Q5G2	RAB GTPase-like protein C2B OS=Medicago truncatula GN=MTR_2g027660 PE=2 SV=1	0	115.907	71	15	39	7	1	211	23.1	7.36	164.96	15	High	High	Not Found	High	High	High	High	High	Deamidated [Q136; Q154; Q172]; Phospho [T152]	1	Phospho [T152]	0
High	Master Protein	G7J421	Tubulin alpha chain OS=Medicago truncatula GN=MTR_3g110720 PE=3 SV=1	0	115.658	31	13	50	2	1	451	49.5	5.06	217.79	13	Not Found	Not Found	Not Found	High	High	High	High	High		0		0
High	Master Protein	G7JI82	Bacterial long-chain fatty acid CoA synthetase OS=Medicago truncatula GN=MTR_3g082660 PE=4 SV=1	0	115.651	26	19	54	18	1	727	79.4	7.49	208	19	High	High	High	High	High	High	High	High		0		0
High	Master Protein	G7J2H2	Glyceraldehyde-3-phosphate dehydrogenase OS=Medicago truncatula GN=MTR_3g085850 PE=3 SV=1	0	115.528	51	21	70	13	1	340	37	7.47	207.25	21	High	Not Found	Not Found	High	High	High	High	High		0		0
High	Master Protein	G7I6U3	FTSH extracellular protease family protein OS=Medicago truncatula GN=MTR_1g080430 PE=4 SV=2	0	115.485	21	28	46	28	1	1214	139.8	6.61	152.19	28	Medium	High	High	High	High	High	High	High		0		0
High	Master Protein	A0A072VQC8	Tubulin alpha chain OS=Medicago truncatula GN=MTR_1g106005 PE=3 SV=1	0	115.173	31	13	46	2	1	450	49.4	5.1	197.58	13	Not Found	Not Found	Not Found	Not Found	High	High	Not Found	Not Found		0		0
High	Master Protein	G7JLC6	F0F1-type ATP synthase, delta subunit OS=Medicago truncatula GN=MTR_4g103330 PE=3 SV=1	0	115.038	37	13	44	13	1	249	27.2	9.11	207.99	13	High	High	High	High	High	High	High	High	Phospho [T203]	0		0
High	Master Protein	G7IPY3	Ribosomal protein S11 OS=Medicago truncatula GN=MTR_2g019670 PE=2 SV=2	0	114.84	72	11	45	3	1	151	16.3	10.59	187.51	11	Not Found	Not Found	High	High	High	High	High	High		0		0
High	Master Protein	G7JYY7	Glutamate-glyoxylate aminotransferase OS=Medicago truncatula GN=MTR_5g033230 PE=4 SV=1	0	114.654	34	17	40	17	1	481	53.7	6.04	154.11	17	Not Found	Not Found	High	High	High	High	High	High		0		0
High	Master Protein	G7K3P1	40S ribosomal protein S3a OS=Medicago truncatula GN=MTR_5g006440 PE=3 SV=1	0	114.351	44	15	46	7	1	261	29.8	9.86	209.59	15	Not Found	Not Found	High	High	High	High	High	High		0		0
High	Master Protein	G8A319	ATP synthase CF1 epsilon subunit OS=Medicago truncatula GN=atpE PE=3 SV=1	0	114.3	85	16	96	4	1	136	15.1	9.54	319.89	16	Not Found	Not Found	High	High	High	High	High	High	Deamidated [Q30; Q93]	0		0
High	Master Protein	A0A072UIC5	Calmodulin-binding protein, putative OS=Medicago truncatula GN=MTR_4g036110 PE=4 SV=1	0	114.127	36	20	53	20	1	393	45	9.48	196.82	20	High	High	High	High	High	High	High	High		0		0
High	Master Protein	G7J9M6	60S ribosomal protein L6 OS=Medicago truncatula GN=MTR_3g093110 PE=2 SV=1	0	113.867	68	16	50	16	1	193	21.7	9.28	199.5	16	High	High	High	High	High	High	High	High		0		0
High	Master Protein	G7JK45	Monocopper oxidase SKS1-like protein OS=Medicago truncatula GN=MTR_4g101650 PE=4 SV=1	0	113.81	30	16	51	15	1	590	66.2	8.91	188.25	16	High	High	High	High	High	High	High	High		0		0
High	Master Protein	A0A072UQA3	26S proteasome regulatory particle triple-A ATPase protein OS=Medicago truncatula GN=MTR_4g094270 PE=3 SV=1	0	113.381	52	18	47	17	1	417	47.1	8.76	198.8	18	Not Found	Not Found	High	High	High	High	High	High		0		0
High	Master Protein	A0A072V2R0	Dihydrolipoyl dehydrogenase OS=Medicago truncatula GN=MTR_4g123070 PE=4 SV=1	0	113.259	35	16	34	16	1	502	53.2	7.36	135.9	16	Not Found	High	High	High	High	High	High	High		0		0
High	Master Protein	G7IGB8	Calcium-transporting ATPase OS=Medicago truncatula GN=MTR_2g038310 PE=3 SV=2	0	113.195	18	19	40	18	1	1093	119.1	7.28	160.37	19	Not Found	High	High	High	High	High	High	High		0		0
High	Master Protein	A0A072VA42	Cytochrome P450 family 72 protein OS=Medicago truncatula GN=MTR_2g072380 PE=4 SV=1	0	113.124	34	16	39	7	1	493	56.3	8.32	144.48	16	Not Found	Not Found	Not Found	Not Found	High	High	High	High		0		0
High	Master Protein	G7KZ97	Ethanolamine-phosphate cytidylyltransferase OS=Medicago truncatula GN=MTR_7g074620 PE=4 SV=2	0	112.728	37	14	41	14	1	422	47	8.09	175.15	14	Not Found	High	High	High	High	High	High	High	Deamidated [R241; Q244; R249]	0		0
High	Master Protein	G7IN22	Actin filament bundling protein P-115-ABP OS=Medicago truncatula GN=MTR_2g036860 PE=4 SV=2	0	111.972	25	20	26	20	1	962	107.2	5.8	99.24	20	High	High	High	High	High	High	High	High	Deamidated [Q178]	0		0
High	Master Protein	G7ZW80	30S ribosomal protein S4 OS=Medicago truncatula GN=rps4 PE=3 SV=1	0	111.921	52	16	41	16	1	201	23.2	10.39	166.85	16	Not Found	High	High	High	High	High	High	High	Deamidated [Q149]	0		0
High	Master Protein	G7IAN2	Tubulin beta chain OS=Medicago truncatula GN=MTR_1g101130 PE=3 SV=1	0	111.833	36	13	41	1	1	449	50.5	4.83	188.37	13	Not Found	High	High	Not Found	Not Found	Not Found	Not Found	Not Found	Deamidated [Q94]	0		0
High	Master Protein	G7IV48	26S protease regulatory subunit 6B OS=Medicago truncatula GN=MTR_3g062510 PE=3 SV=1	0	111.579	46	19	53	18	1	415	46.4	5.59	189.68	19	High	High	High	High	High	High	High	High		0		0
High	Master Protein	G7LAL2	Nuclear pore complex Nup155-like protein OS=Medicago truncatula GN=MTR_8g105290 PE=4 SV=1	0	111.479	14	15	29	15	1	1484	162	6.04	120.43	15	Not Found	High	High	High	High	High	High	High		0		0
High	Master Protein	G7LCR3	Calcium-dependent lipid-binding (CaLB domain) family protein OS=Medicago truncatula GN=MTR_8g035590 PE=4 SV=1	0	111.322	32	18	51	18	1	513	55.4	8.78	209.41	18	High	High	High	High	High	High	High	High		0		0
High	Master Protein	G7IH13	Translation elongation factor EF-2 subunit OS=Medicago truncatula GN=MTR_2g069050 PE=4 SV=1	0	111.238	34	24	43	3	1	843	94.1	6.11	158.26	24	Not Found	High	Not Found	Not Found	High	Not Found	Not Found	Not Found	Carboxymethyl [C370]	0		0
High	Master Protein	A0A072U103	Acetyl-CoA carboxylase, carboxyl transferase, alpha subunit OS=Medicago truncatula GN=MTR_7g066870 PE=3 SV=1	0	111.226	25	21	33	20	1	860	95.4	9.35	119.03	21	High	High	High	High	High	High	High	High	Deamidated [Q496]	0		0
High	Master Protein	A0A072UME9	Delta(24)-sterol reductase-like protein OS=Medicago truncatula GN=MTR_4g074350 PE=4 SV=1	0	110.56	34	21	41	21	1	567	65.9	8.38	145.65	21	High	High	High	High	High	High	High	High		0		0
High	Master Protein	G7IV56	LRR receptor-like kinase OS=Medicago truncatula GN=MTR_3g062590 PE=3 SV=1	0	110.494	23	18	32	15	1	955	105.4	6.8	120.24	18	High	High	High	Not Found	High	High	High	High		0		0
High	Master Protein	G7LBF4	Dynamin-like protein 1E OS=Medicago truncatula GN=MTR_8g105580 PE=3 SV=1	0	110.241	31	20	31	12	1	616	69	8.03	121.99	20	Not Found	High	High	High	High	Not Found	High	High	Deamidated [Q84]	0		0
High	Master Protein	G7LFP6	CBS/octicosapeptide/phox/Bemp1 (PB1) domain protein OS=Medicago truncatula GN=MTR_8g094780 PE=4 SV=1	0	109.983	24	11	21	5	1	534	57.6	7.34	116.08	11	Not Found	Not Found	High	Not Found	High	High	High	High		0		0
High	Master Protein	S4T0Y5	Photosystem II D2 protein OS=Medicago truncatula GN=psbD PE=3 SV=1	0	109.971	23	10	77	10	1	353	39.5	5.55	303.61	10	High	High	High	High	High	High	High	High	Deamidated [Q333; Q335; R349]	0		0
High	Master Protein	G7KIQ9	Carbonic anhydrase OS=Medicago truncatula GN=MTR_6g006990 PE=3 SV=1	0	109.909	41	10	64	10	1	331	35.6	7.42	250.24	10	High	High	High	High	High	High	High	High	Carboxymethyl [C168]; Phospho [T105; T110; S170]; Deamidated [Q103; Q107]	0		0
High	Master Protein	A0A072TUJ3	COP1-interactive protein, putative OS=Medicago truncatula GN=MTR_8g099275 PE=4 SV=1	0	109.83	22	21	25	21	1	1223	141.5	4.98	103.8	21	High	High	High	High	High	High	High	High		0		0
High	Master Protein	G8A394	Acetyl-CoA carboxylase OS=Medicago truncatula GN=MTR_3g073860 PE=4 SV=1	0	109.796	11	19	26	19	1	2256	251.7	6.27	105.36	19	Not Found	High	High	High	High	High	High	High		0		0
High	Master Protein	G7KFF1	Niemann-pick C1-like protein OS=Medicago truncatula GN=MTR_5g099070 PE=4 SV=2	0	109.709	12	13	38	13	1	1340	147.1	5.25	170.89	13	Not Found	Not Found	High	High	High	High	High	High	Carboxymethyl [C83]	0		0
High	Master Protein	G7IKY4	Translocon outer complex protein OS=Medicago truncatula GN=MTR_2g030630 PE=4 SV=1	0	109.641	19	23	39	23	1	1338	146.5	4.72	124.42	23	High	High	High	High	High	High	High	High		0		0
High	Master Protein	A0A072UVI4	Copper ion-binding protein OS=Medicago truncatula GN=MTR_4g052910 PE=4 SV=1	0	109.481	31	7	38	7	1	163	17.4	9.45	256.25	7	High	Not Found	High	High	High	High	High	High		0		0
High	Master Protein	B7FGS0	60S ribosomal protein L13 OS=Medicago truncatula GN=MTR_1g022165 PE=2 SV=1	0	109.16	61	18	76	3	1	207	23.9	10.93	256.56	18	Not Found	High	High	Not Found	High	Not Found	Not Found	Medium		0		0
High	Master Protein	A0A072VPJ1	Protein disulfide isomerase-like protein, putative OS=Medicago truncatula GN=MTR_1g096790 PE=4 SV=1	0	108.929	32	16	46	16	1	430	48.5	5.11	177.59	16	High	High	High	High	High	High	High	High		0		0
High	Master Protein	G7JGP9	Cytosol aminopeptidase family protein OS=Medicago truncatula GN=MTR_4g130860 PE=3 SV=1	0	108.924	31	14	26	13	1	567	59.6	7.71	114.6	14	Not Found	Not Found	High	High	High	High	High	High		0		0
High	Master Protein	G7JKQ6	Dynamin-2B-like protein OS=Medicago truncatula GN=MTR_4g030140 PE=3 SV=1	0	108.787	24	18	25	18	1	922	100.1	9.11	103.35	18	High	High	High	High	High	High	High	High	Deamidated [R74]	0		0
High	Master Protein	A0A072U270	Feronia receptor-like kinase OS=Medicago truncatula GN=MTR_7g073660 PE=4 SV=1	0	108.249	25	17	25	13	1	899	97.9	6.3	100.02	17	Not Found	High	Not Found	High	High	High	High	High	Deamidated [Q95]	0		0
High	Master Protein	G7JRA0	Tubulin beta chain OS=Medicago truncatula GN=MTR_4g019090 PE=3 SV=1	0	108.099	33	12	42	1	1	449	50.6	4.86	187.69	12	Not Found	Not Found	High	Not Found	Not Found	Not Found	Not Found	Not Found	Deamidated [Q94]	0		0
High	Master Protein	A0A072VLT4	Ion channel pollux-like protein OS=Medicago truncatula GN=MTR_1g076330 PE=4 SV=1	0	108.058	22	22	70	22	1	855	96.7	8.56	240.97	22	High	High	High	High	High	High	High	High	Deamidated [Q538]	0		0
High	Master Protein	A0A072UW90	60 kDa inner membrane protein OS=Medicago truncatula GN=MTR_4g063705 PE=3 SV=1	0	107.729	21	10	25	10	1	444	48.6	9.32	130.95	10	High	High	High	High	High	High	High	High		0		0
High	Master Protein	G7IML1	Tubulin beta chain OS=Medicago truncatula GN=MTR_2g031310 PE=3 SV=1	0	107.608	40	15	51	2	1	445	50	4.89	218.1	15	Not Found	High	Not Found	Not Found	Not Found	Not Found	High	High		0		0
High	Master Protein	G7J4L3	NADPH--cytochrome P450 reductase OS=Medicago truncatula GN=MTR_3g100160 PE=2 SV=1	0	107.46	26	17	46	15	1	692	76.8	5.24	189.89	17	High	High	High	High	High	High	High	High	Deamidated [R157]	0		0
High	Master Protein	G7JJ67	Calmodulin-domain kinase CDPK protein OS=Medicago truncatula GN=MTR_4g132070 PE=4 SV=1	0	107.134	40	18	43	15	1	539	60.5	6.6	155.76	18	High	High	High	High	High	High	High	High	Phospho [S22; S23]	0		0
High	Master Protein	A0A072UVE5	Nicalin OS=Medicago truncatula GN=MTR_4g052530 PE=3 SV=1	0	107.009	33	17	35	17	1	564	62.2	6.55	122.54	17	Not Found	High	High	High	High	High	High	High		0		0
High	Master Protein	G8A207	Carboxy-terminal region remorin OS=Medicago truncatula GN=MTR_1g100647 PE=2 SV=1	0	106.734	55	16	35	14	1	209	23.1	8.12	161.41	16	High	High	High	High	High	High	High	High		0		0
High	Master Protein	G7KEN6	Heat shock protein 81-2 OS=Medicago truncatula GN=MTR_5g097320 PE=3 SV=1	0	106.33	31	22	37	15	1	792	90	5.48	131.2	22	High	Not Found	High	High	High	High	High	High		0		0
High	Master Protein	G7IF30	Formate-tetrahydrofolate ligase OS=Medicago truncatula GN=MTR_1g116140 PE=3 SV=2	0	106.187	32	20	34	20	1	699	74.7	7.43	125.72	20	High	High	High	High	High	High	High	High		0		0
High	Master Protein	G7JK03	Serine/Threonine kinase, plant-type protein, putative OS=Medicago truncatula GN=MTR_4g085480 PE=4 SV=2	0	106.097	25	14	59	14	1	460	51.2	8.15	205.8	14	High	High	High	High	High	High	High	High	Carboxymethyl [C151]; Deamidated [R276]	0		0
High	Master Protein	Q4ZGM9	13-hydroperoxide lyase OS=Medicago truncatula GN=HPL3 PE=2 SV=1	0	105.977	31	13	49	13	1	480	53.7	8.15	186.15	13	High	High	High	High	High	High	High	High		0		0
High	Master Protein	G7K2L1	Plant intracellular ras group-related LRR protein OS=Medicago truncatula GN=MTR_5g024780 PE=4 SV=1	0	105.882	35	19	36	18	1	585	64.5	6.33	109.52	19	Not Found	Medium	High	High	High	High	High	High		0		0
High	Master Protein	G7K6J9	Rubredoxin family protein OS=Medicago truncatula GN=MTR_5g008050 PE=2 SV=2	0	105.832	26	8	67	8	1	273	28.6	9.67	295.4	8	High	High	High	High	High	High	High	High	Deamidated [Q100; R119; R165]	0		0
High	Master Protein	A0A072VNA3	Glycerol-3-phosphate dehydrogenase OS=Medicago truncatula GN=MTR_1g094185 PE=3 SV=1	0	105.602	30	21	42	20	1	626	68.4	8.13	160.21	21	Not Found	Not Found	High	High	High	High	High	High		0		0
High	Master Protein	G7JPH8	Photosystem II stability/assembly factor HCF136 OS=Medicago truncatula GN=MTR_4g075040 PE=4 SV=1	0	105.337	42	16	36	16	1	396	43.7	8.03	146.96	16	Not Found	High	High	High	High	High	High	High		0		0
High	Master Protein	G7IF78	Multidrug resistance protein ABC transporter family protein OS=Medicago truncatula GN=MTR_1g088680 PE=4 SV=1	0	105.149	16	20	46	16	1	1515	169.4	7.8	149.45	20	Not Found	High	High	High	High	High	High	High		0		0
High	Master Protein	A0A072VNB6	Uncharacterized protein OS=Medicago truncatula GN=MTR_1g084990 PE=4 SV=1	0	105.054	22	18	22	18	1	1133	123.9	4.23	92.35	18	High	High	High	High	High	Not Found	Not Found	Not Found		0		0
High	Master Protein	G7L8W8	Signal peptidase I family protein OS=Medicago truncatula GN=MTR_8g103470 PE=2 SV=1	0	103.557	48	16	44	16	1	292	32.5	9.17	180.17	16	High	High	High	High	High	High	High	High	Deamidated [R206]	0		0
High	Master Protein	G7J0C1	WPP domain interacting protein, putative OS=Medicago truncatula GN=MTR_3g009740 PE=4 SV=1	0	103.102	30	14	27	14	1	575	62.6	4.93	124.89	14	Not Found	High	High	High	High	High	High	High		0		0
High	Master Protein	G7L912	CASP carboxy-terminal protein OS=Medicago truncatula GN=MTR_8g103950 PE=4 SV=1	0	102.936	28	21	30	20	1	683	78.9	5.57	113.38	21	High	High	High	High	High	High	High	High		0		0
High	Master Protein	G7LE78	LRR receptor-like kinase OS=Medicago truncatula GN=MTR_8g107470 PE=4 SV=2	0	102.597	33	20	57	14	1	666	72.1	7.21	208.47	20	Not Found	High	High	High	High	High	High	High		0		0
High	Master Protein	G7LIP6	Dicarboxylate carrier protein OS=Medicago truncatula GN=MTR_8g086070 PE=3 SV=1	0	102.529	34	13	81	13	1	301	32.2	9.33	281.03	13	High	High	High	High	High	High	High	High	Deamidated [Q155]	0		0
High	Master Protein	G7J0E0	Photosystem I reaction center subunit V OS=Medicago truncatula GN=MTR_3g010000 PE=4 SV=2	0	102.307	27	7	79	7	1	150	16.6	9.7	342.98	7	High	High	High	High	High	High	High	High	Deamidated [Q84; Q89; R101]; Phospho [T93]	1	Phospho [T93]	0
High	Master Protein	A0A072U9U8	ABC transporter family protein OS=Medicago truncatula GN=MTR_6g465300 PE=4 SV=1	0	102.2	22	16	31	15	1	715	78.3	8.94	117.61	16	Not Found	High	High	Medium	High	High	High	High		0		0
High	Master Protein	A0A072UZC8	Heat shock 70 kDa protein OS=Medicago truncatula GN=MTR_3g081170 PE=3 SV=1	0	102.166	22	21	32	21	1	884	98.9	5.8	118.04	21	High	High	High	High	High	High	High	High		0		0
High	Master Protein	G7I7R4	Calcium-dependent lipid-binding (CaLB domain) family protein OS=Medicago truncatula GN=MTR_1g025550 PE=4 SV=1	0	101.873	32	16	39	15	1	535	61	7.83	143.65	16	High	High	High	High	High	High	High	High		0		0
High	Master Protein	G7JIM0	Coatomer subunit alpha OS=Medicago truncatula GN=MTR_4g071130 PE=4 SV=1	0	101.697	21	22	33	12	1	1206	135.4	6.96	109.45	22	Not Found	Not Found	High	High	High	High	High	High		0		0
High	Master Protein	G7J4F9	Light-harvesting complex I chlorophyll A/B-binding protein OS=Medicago truncatula GN=MTR_3g088040 PE=2 SV=1	0	101.693	23	9	53	9	1	270	28.9	6.77	223.47	9	High	High	High	High	High	High	High	High		0		0
High	Master Protein	A0A072V4G2	F0F1 ATP synthase subunit gamma OS=Medicago truncatula GN=MTR_2g023290 PE=3 SV=1	0	101.601	15	15	88	14	1	1021	111.6	4.96	301.96	15	High	High	High	High	High	High	High	High	Deamidated [R740; Q758; Q966]; Phospho [S968]	1	Phospho [S968]	0
High	Master Protein	G7J9U2	Transmembrane 9 superfamily member OS=Medicago truncatula GN=MTR_3g105950 PE=3 SV=1	0	101.459	17	14	40	13	1	636	73.2	8.22	171.94	14	Not Found	High	High	High	High	High	High	High		0		0
High	Master Protein	G7IBQ7	Protein translocase subunit SecA OS=Medicago truncatula GN=MTR_1g086050 PE=3 SV=1	0	101.454	22	25	32	25	1	1011	114.2	7.31	109.3	25	High	High	High	High	High	High	High	High		0		0
High	Master Protein	A0A072UUK4	Protein transporter Sec31 OS=Medicago truncatula GN=MTR_4g045577 PE=4 SV=1	0	101.432	21	17	28	17	1	1124	121.6	5.35	118.51	17	Not Found	High	High	High	High	High	High	High	Deamidated [Q414; R418]	0		0
High	Master Protein	G7LDP4	ADP/ATP carrier protein OS=Medicago truncatula GN=MTR_8g036880 PE=3 SV=1	0	101.404	36	20	76	2	1	399	43.3	9.82	223.35	20	Not Found	Not Found	Not Found	Not Found	High	High	High	High	Deamidated [Q246; Q350]	0		0
High	Master Protein	A0A072TQN9	Plastocyanin-like domain protein OS=Medicago truncatula GN=MTR_8g463180 PE=4 SV=1	0	101.39	31	17	55	17	1	303	30.1	8.68	217.98	17	High	High	High	High	High	High	High	High	Carboxymethyl [C111]	0		0
High	Master Protein	G7K694	Fructose-bisphosphate aldolase OS=Medicago truncatula GN=MTR_5g069050 PE=4 SV=2	0	100.973	32	11	30	1	1	384	40.6	5.29	126.97	11	Not Found	Not Found	Not Found	Medium	Medium	Not Found	Not Found	Not Found		0		0
High	Master Protein	G7IP43	Early-responsive to dehydration stress protein (ERD4) OS=Medicago truncatula GN=MTR_2g018780 PE=4 SV=1	0	100.822	23	22	64	22	1	722	81.6	9.17	194.27	22	High	High	High	High	High	High	High	High		0		0
High	Master Protein	A0A072UTP5	ADP/ATP carrier protein OS=Medicago truncatula GN=MTR_3g028590 PE=3 SV=1	0	100.674	37	20	99	5	1	393	42.7	9.82	309.61	20	High	High	High	High	High	High	High	High	Deamidated [Q240; Q344]	0		0
High	Master Protein	G7JPW3	SPFH/band 7/PHB domain membrane-associated family protein OS=Medicago truncatula GN=MTR_4g107730 PE=4 SV=2	0	100.62	31	14	52	8	1	282	31.3	6.44	182.86	14	Not Found	High	High	High	High	High	High	High		0		0
High	Master Protein	A0A072VYH6	Fungal proteinase A, aspartic proteinase superfamily protein OS=Medicago truncatula GN=MTR_1g484940 PE=3 SV=1	0	100.182	18	10	36	10	1	508	55.6	5.8	173.33	10	Not Found	High	High	High	High	High	High	High	Deamidated [Q260]	0		0
High	Master Protein	G7J2K6	Enoyl-(Acyl carrier) reductase OS=Medicago truncatula GN=MTR_3g086210 PE=3 SV=1	0	100.109	44	19	51	18	1	320	35.9	9.52	178.23	19	Not Found	Not Found	High	High	High	High	High	High		0		0
High	Master Protein	I3S8V0	Stem-loop-binding protein of 41 kDa protein B OS=Medicago truncatula GN=MTR_7g111860 PE=2 SV=1	0	100.04	51	17	38	17	1	378	42	7.96	132.77	17	Not Found	Not Found	High	High	High	High	High	High		0		0
High	Master Protein	B7FGU7	Cytochrome b6-f complex iron-sulfur subunit OS=Medicago truncatula GN=MTR_2g089510 PE=2 SV=1	0	99.999	33	9	56	9	1	229	23.9	7.62	256.57	9	High	High	High	High	High	High	High	High	Carboxymethyl [C201]; Phospho [S195]	1	Phospho [S195]	0
High	Master Protein	G7JL66	Methylcrotonyl-CoA carboxylase beta chain, putative OS=Medicago truncatula GN=MTR_4g085890 PE=4 SV=1	0	99.956	29	15	25	15	1	552	59.7	8.37	105.51	15	Not Found	Not Found	High	High	High	High	High	High		0		0
High	Master Protein	G7KWF6	60S ribosomal protein L13 OS=Medicago truncatula GN=MTR_7g111590 PE=2 SV=1	0	99.274	53	17	74	1	1	207	24	10.93	250.67	17	Not Found	High	Not Found	Not Found	Not Found	Not Found	Not Found	Not Found		0		0
High	Master Protein	A0A072VNH5	Coatomer subunit alpha OS=Medicago truncatula GN=MTR_1g090827 PE=4 SV=1	0	98.982	17	17	27	7	1	1216	136.2	6.92	104.46	17	Not Found	High	High	High	Not Found	Not Found	High	High		0		0
High	Master Protein	G7I8F2	Long-chain fatty acyl CoA ligase, putative OS=Medicago truncatula GN=MTR_1g030290 PE=4 SV=1	0	98.476	20	14	45	11	1	696	76.3	7.12	167.66	14	Not Found	High	High	High	High	High	High	High		0		0
High	Master Protein	G7KB73	Annexin OS=Medicago truncatula GN=MTR_5g063670 PE=2 SV=1	0	98.356	53	19	47	19	1	316	36.1	7.61	157.47	19	High	High	High	High	High	High	High	High		0		0
High	Master Protein	G7IUA3	Receptor-like kinase, putative OS=Medicago truncatula GN=MTR_2g096160 PE=4 SV=1	0	98.22	21	14	31	12	1	847	92.9	5.85	114.86	14	High	High	High	High	High	High	High	High	Deamidated [Q727; Q730]	0		0
High	Master Protein	A0A072VUN2	White-brown-complex ABC transporter family protein OS=Medicago truncatula GN=MTR_1g054935 PE=4 SV=1	0	97.98	18	13	36	6	1	742	82	8.85	140.92	13	Not Found	Not Found	Not Found	High	High	High	High	High		0		0
High	Master Protein	G7JPC5	Major intrinsic protein (MIP) family transporter OS=Medicago truncatula GN=MTR_4g059390 PE=2 SV=1	0	97.84	37	8	56	5	1	285	30.5	7.09	204.89	8	High	High	High	High	High	High	High	High	Phospho [S280]	1	Phospho [S280]	0
High	Master Protein	G7J486	Elongation factor Tu OS=Medicago truncatula GN=MTR_3g076660 PE=3 SV=1	0	97.267	32	15	38	15	1	489	53.2	6.65	140.39	15	High	High	High	High	High	High	High	High		0		0
High	Master Protein	G7L7C1	Dynamin 4C-like protein OS=Medicago truncatula GN=MTR_8g087770 PE=3 SV=1	0	97.039	23	13	22	13	1	674	75.3	6.09	94.19	13	High	High	High	High	High	High	High	High		0		0
High	Master Protein	G7K3D2	Tropomyosin-like protein, putative OS=Medicago truncatula GN=MTR_5g091710 PE=4 SV=1	0	97.025	35	14	34	14	1	345	39.3	4.88	146.07	14	High	High	High	High	High	High	High	High	Deamidated [R301]	0		0
High	Master Protein	G7K4T4	Fructose-bisphosphate aldolase OS=Medicago truncatula GN=MTR_5g096670 PE=2 SV=1	0	96.894	48	13	25	10	1	357	38.3	6.15	99.79	13	Not Found	High	High	High	High	High	High	High		0		0
High	Master Protein	B7FGN8	Ubiquitin-40S ribosomal S27a-like protein OS=Medicago truncatula GN=MTR_8g088060 PE=2 SV=1	0	96.863	45	11	68	11	1	155	17.7	9.77	247.31	11	High	High	High	High	High	High	High	High		0		0
High	Master Protein	G7K274	Outer membrane OMP85 family protein OS=Medicago truncatula GN=MTR_5g083050 PE=4 SV=2	0	96.751	34	19	36	18	1	520	58.7	5.73	141.54	19	High	High	High	High	High	High	High	High		0		0
High	Master Protein	G7L7H0	Malic enzyme OS=Medicago truncatula GN=MTR_8g102620 PE=3 SV=1	0	96.629	39	20	47	13	1	591	65.3	6.37	161.1	20	Not Found	Not Found	High	High	High	High	High	High		0		0
High	Master Protein	G7ITZ5	Aconitate hydratase OS=Medicago truncatula GN=MTR_2g088360 PE=3 SV=1	0	96.552	24	20	44	10	1	979	107	7.72	145.45	20	Not Found	Not Found	High	High	High	High	High	High		0		0
High	Master Protein	A0A072VH72	Aminoacylase OS=Medicago truncatula GN=MTR_1g038920 PE=3 SV=1	0	95.614	48	19	37	18	1	452	50.5	6.55	129.86	19	Not Found	High	High	High	High	High	High	High		0		0
High	Master Protein	G7KE90	Ubiquinol oxidase OS=Medicago truncatula GN=MTR_5g070870 PE=3 SV=1	0	95.593	31	11	35	10	1	324	37.1	8.48	159.1	11	Not Found	High	High	High	High	High	High	High	Deamidated [R82]	0		0
High	Master Protein	G7KHK9	p-loop nucleoside triphosphate hydrolase superfamily protein OS=Medicago truncatula GN=MTR_6g005760 PE=4 SV=2	0	95.31	37	23	41	19	1	604	66.9	8.78	126.28	23	High	High	High	High	High	High	High	High		0		0
High	Master Protein	G7LDT1	Multidrug resistance protein ABC transporter family protein OS=Medicago truncatula GN=MTR_8g061970 PE=4 SV=1	0	95.263	12	17	35	3	1	1498	167.5	7.39	127.6	17	Not Found	Not Found	High	High	High	High	High	High	Deamidated [Q1346]	0		0
High	Master Protein	G7JB62	Major intrinsic protein (MIP) family transporter OS=Medicago truncatula GN=MTR_3g070210 PE=3 SV=1	0	94.881	34	11	63	7	1	290	31	8.53	263.53	11	High	High	High	High	High	High	High	High	Deamidated [R18; Q19]	0		0
High	Master Protein	G7JS60	Thioredoxin-dependent peroxidase OS=Medicago truncatula GN=MTR_4g124790 PE=2 SV=2	0	94.777	42	10	25	10	1	221	24.2	9.47	124.71	10	High	High	High	High	High	High	High	High	Deamidated [Q198]	0		0
High	Master Protein	A0A072VDK2	Outer envelope pore protein 24B OS=Medicago truncatula GN=MTR_1g022050 PE=4 SV=1	0	94.452	52	15	50	15	1	213	23.6	9.38	200.56	15	High	High	High	High	High	High	High	High		0		0
High	Master Protein	G7IT86	Phosphoglycerate kinase OS=Medicago truncatula GN=MTR_2g066120 PE=3 SV=1	0	94.307	48	18	49	15	1	401	42.4	6.01	166.14	18	High	High	High	High	High	High	High	High		0		0
High	Master Protein	I3SN70	Photosystem I reaction center subunit III OS=Medicago truncatula GN=MTR_2g029370 PE=2 SV=1	0	93.892	38	14	144	14	1	224	24.7	9.69	423.15	14	High	High	High	High	High	High	High	High		0		0
High	Master Protein	G7L8A8	Fluorescent IN BLUE LIGHT protein OS=Medicago truncatula GN=MTR_8g022040 PE=4 SV=1	0	93.582	31	12	39	12	1	300	33.4	8.7	174.05	12	High	High	High	High	High	High	High	High		0		0
High	Master Protein	A0A072VE85	Serine/Threonine kinase, ABC1 family protein OS=Medicago truncatula GN=MTR_1g009860 PE=4 SV=1	0	93.433	32	20	47	20	1	654	73.4	5.43	146.45	20	Not Found	High	High	High	High	High	High	High		0		0
High	Master Protein	G7J3A3	Alpha-mannosidase OS=Medicago truncatula GN=MTR_3g098650 PE=3 SV=1	0	93.204	22	20	28	16	1	1016	114.7	6.95	105.82	20	Not Found	High	High	High	High	High	High	High		0		0
High	Master Protein	G7JNF4	Calcium-dependent lipid-binding (CaLB domain) family protein OS=Medicago truncatula GN=MTR_4g073400 PE=4 SV=1	0	93.093	36	18	42	17	1	537	61.3	6.77	161.4	18	High	High	High	High	High	High	High	High		0		0
High	Master Protein	G7JG44	RAB GTPase-like protein A1D OS=Medicago truncatula GN=MTR_4g069850 PE=4 SV=1	0	92.67	62	15	46	5	1	206	23.1	5.08	158.04	15	Not Found	Not Found	High	High	High	High	High	High	Deamidated [R135]	0		0
High	Master Protein	G7I565	Arabinose kinase-like protein OS=Medicago truncatula GN=MTR_1g009190 PE=4 SV=1	0	92.626	22	19	34	19	1	992	108.7	6.87	113.72	19	Not Found	High	High	High	High	High	High	High		0		0
High	Master Protein	G7KH66	Protein disulfide isomerase-like protein OS=Medicago truncatula GN=MTR_5g084930 PE=3 SV=1	0	92.612	33	15	28	15	1	435	47.4	5.57	123.84	15	Not Found	Not Found	High	High	High	High	High	High		0		0
High	Master Protein	A0A072VK12	Cytochrome P450 family 72 protein OS=Medicago truncatula GN=MTR_2g072340 PE=3 SV=1	0	92.249	29	14	31	5	1	518	59.1	7.99	113.14	14	Not Found	Not Found	Not Found	Not Found	High	High	High	High		0		0
High	Master Protein	A0A072VNV3	Embryo defective 2410 protein OS=Medicago truncatula GN=MTR_1g010300 PE=4 SV=1	0	91.739	9	14	16	14	1	2205	242.8	6.44	63.98	14	High	High	Not Found	High	High	High	Not Found	Not Found		0		0
High	Master Protein	Q2HVI3	60S ribosomal protein L7 OS=Medicago truncatula GN=MTR_2g038250 PE=4 SV=1	0	91.716	50	17	60	2	1	244	28.5	9.89	194.23	17	Not Found	Not Found	High	Not Found	High	High	High	High		0		0
High	Master Protein	G7LIN7	Tubulin alpha chain OS=Medicago truncatula GN=MTR_8g085980 PE=3 SV=1	0	91.667	23	11	45	4	1	449	49.5	5.14	185.35	11	Not Found	Not Found	Not Found	High	High	High	Not Found	High		0		0
High	Master Protein	A2Q5N9	Galactose mutarotase-like OS=Medicago truncatula GN=MTR_7g085490 PE=4 SV=1	0	91.527	48	14	52	14	1	355	39.2	7.84	186.6	14	Medium	High	Medium	High	High	High	High	High	Deamidated [R66]	0		0
High	Master Protein	G7K465	LRR ribonuclease inhibitor domain protein OS=Medicago truncatula GN=MTR_5g035590 PE=4 SV=1	0	91.421	29	14	23	14	1	606	64.9	8.62	97.6	14	High	Not Found	High	High	High	High	High	High		0		0
High	Master Protein	A0A072VC55	Syntaxin of plants 122 protein OS=Medicago truncatula GN=MTR_2g088700 PE=4 SV=1	0	91.366	48	16	48	16	1	307	34.6	6.57	168.16	16	High	High	High	High	High	High	High	High	Deamidated [R115]	0		0
High	Master Protein	A0A072UL06	Dolichyl-diphosphooligosaccharide--protein glycosyltransferase 48 kDa subunit OS=Medicago truncatula GN=MTR_4g069240 PE=3 SV=1	0	91.3	33	16	49	16	1	434	48.3	6.29	169.51	16	High	High	High	High	High	High	High	High	Deamidated [R380]	0		0
High	Master Protein	Q2MJ15	Cytochrome P450 family monooxygenase OS=Medicago truncatula GN=CYP92A29 PE=2 SV=1	0	91.177	24	15	36	15	1	512	59.1	8.63	140.3	15	Not Found	High	High	High	High	High	High	High		0		0
High	Master Protein	A0A072UN34	Protein phosphatase 2C-like protein OS=Medicago truncatula GN=MTR_4g094208 PE=4 SV=1	0	91.164	59	14	33	14	1	278	30.3	7.21	135.2	14	Not Found	High	High	High	High	High	High	High	Deamidated [Q189]	0		0
High	Master Protein	G7KFV7	Isocitrate dehydrogenase [NADP] OS=Medicago truncatula GN=MTR_5g077070 PE=3 SV=1	0	91.046	39	14	32	10	1	412	46	6.39	124.34	14	Not Found	High	High	High	High	High	High	High		0		0
High	Master Protein	Q2MJ19	Cytochrome P450 family 709 protein OS=Medicago truncatula GN=CYP72A68 PE=2 SV=1	0	90.794	30	18	37	3	1	520	59.9	9.07	129.69	18	High	High	Not Found	High	High	High	Not Found	Not Found		0		0
High	Master Protein	G7LA51	Methyltransferase PMT2-like protein OS=Medicago truncatula GN=MTR_8g055840 PE=4 SV=1	0	90.361	35	20	50	12	1	610	69	7.2	184.14	20	Not Found	Not Found	Not Found	High	High	High	High	High		0		0
High	Master Protein	G7K028	Phosphoinositide phosphatase SAC1 OS=Medicago truncatula GN=MTR_5g023960 PE=4 SV=2	0	90.284	21	13	22	13	1	596	67.8	7.87	112.9	13	Not Found	Not Found	Medium	High	High	High	High	Medium		0		0
High	Master Protein	A0A072VQC0	RAB GTPase-like protein A1D OS=Medicago truncatula GN=MTR_1g097420 PE=4 SV=1	0	90.111	58	12	38	4	1	207	23	5.17	134.84	12	Not Found	Not Found	Not Found	High	High	High	High	High	Deamidated [R135]	0		0
High	Master Protein	I3SSE5	Oxygen-evolving enhancer protein OS=Medicago truncatula GN=MTR_8g005175 PE=2 SV=1	0	89.993	51	12	45	12	1	232	24.9	9.66	178.42	12	Not Found	High	High	High	High	High	High	High		0		0
High	Master Protein	G7JPD1	Protein disulfide-isomerase OS=Medicago truncatula GN=MTR_4g059450 PE=3 SV=1	0	89.775	28	16	22	15	1	583	65.1	4.77	88.89	16	Not Found	High	High	High	High	High	High	High		0		0
High	Master Protein	A0A072VS77	Methylenetetrahydrofolate reductase OS=Medicago truncatula GN=MTR_1g040105 PE=3 SV=1	0	89.601	30	15	31	15	1	595	66.9	6.02	123.97	15	Not Found	High	High	High	High	High	High	High		0		0
High	Master Protein	A2Q4Q6	Allantoinase OS=Medicago truncatula GN=MTR_2g013060 PE=4 SV=1	0	89.59	29	12	22	12	1	504	55.3	5.53	129.65	12	Not Found	High	High	Not Found	High	High	High	High		0		0
High	Master Protein	G7K6T2	60S ribosomal protein L13 OS=Medicago truncatula GN=MTR_5g026750 PE=2 SV=2	0	89.554	53	15	56	4	1	207	23.9	10.84	194.89	15	Not Found	Not Found	Not Found	High	High	High	High	High		0		0
High	Master Protein	G7IEC9	RAN GTPase activating protein OS=Medicago truncatula GN=MTR_1g072250 PE=4 SV=1	0	89.533	25	14	31	14	1	533	57.8	4.65	117.66	14	High	High	High	High	High	High	High	High		0		0
High	Master Protein	G7JEF5	NDH-dependent cyclic electron flow protein OS=Medicago truncatula GN=MTR_4g007080 PE=4 SV=1	0	89.231	27	14	44	14	1	472	52.6	6.64	159.16	14	High	High	High	High	High	High	High	High		0		0
High	Master Protein	G7IFI1	LRR receptor-like kinase OS=Medicago truncatula GN=MTR_2g014960 PE=4 SV=1	0	89.187	20	14	33	14	1	934	102.7	6	113.9	14	Not Found	Not Found	High	High	High	High	High	High		0		0
High	Master Protein	G7JEF1	Vacuolar ATP synthase subunit D, putative OS=Medicago truncatula GN=MTR_4g007030 PE=4 SV=1	0	88.654	55	16	52	16	1	259	29	9.58	208.68	16	High	High	High	High	High	High	High	High		0		0
High	Master Protein	Q84RD9	Adenosylhomocysteinase OS=Medicago truncatula GN=AHC1 PE=3 SV=1	0	88.482	35	16	37	9	1	485	53.3	5.91	125.77	16	High	High	High	High	High	High	High	High		0		0
High	Master Protein	A0A072TVH5	Heat shock protein 81-2 OS=Medicago truncatula GN=MTR_0009s0390 PE=3 SV=1	0	88.263	27	17	30	11	1	791	89.8	5.14	102.7	17	Not Found	Not Found	High	High	High	High	High	High		0		0
High	Master Protein	G7JK55	Elongation factor G, chloroplastic OS=Medicago truncatula GN=MTR_4g101750 PE=3 SV=1	0	88.232	25	16	24	16	1	779	86	5.66	110.14	16	Not Found	Not Found	High	High	High	High	High	High		0		0
High	Master Protein	A0A072VPF0	Elongation factor 1-alpha OS=Medicago truncatula GN=MTR_1g095703 PE=3 SV=1	0	88.176	23	15	49	1	1	448	49.4	9.06	171.88	15	Not Found	Not Found	Not Found	Not Found	Not Found	Not Found	High	Not Found		0		0
High	Master Protein	G7J036	Syntaxin of plants protein OS=Medicago truncatula GN=MTR_3g055200 PE=4 SV=2	0	88.086	56	13	27	2	1	261	28.9	8.15	113.15	13	Not Found	Not Found	High	High	Not Found	Not Found	Not Found	Not Found	Deamidated [Q164; R165]	0		0
High	Master Protein	A0A072UHZ1	Drug resistance transporter-like ABC domain protein OS=Medicago truncatula GN=MTR_4g011630 PE=3 SV=1	0	88.062	10	17	54	0	1	1437	161.8	7.2	194.21	17	Not Found	Not Found	Not Found	Not Found	Not Found	Not Found	Not Found	Not Found	Deamidated [R61; R63]	0		0
High	Master Protein	A0A072W040	NAD(P)-binding rossmann-fold protein OS=Medicago truncatula GN=MTR_1g100305 PE=3 SV=1	0	87.917	50	13	37	10	1	315	34.3	9.45	142.32	13	High	High	High	High	High	High	High	High		0		0
High	Master Protein	G7KAG7	Thylakoid lumenal 29 kDa protein OS=Medicago truncatula GN=MTR_5g064610 PE=3 SV=1	0	87.83	42	16	46	15	1	353	38.9	8.09	161.35	16	Not Found	Not Found	High	High	High	High	High	High		0		0
High	Master Protein	A0A072VGG1	Aldehyde dehydrogenase OS=Medicago truncatula GN=MTR_1g029840 PE=3 SV=1	0	87.718	34	15	28	15	1	488	53.4	8.88	100.38	15	High	High	High	High	High	High	High	High	Deamidated [R203]	0		0
High	Master Protein	G7JAP0	Sedoheptulose-1,7-bisphosphatase OS=Medicago truncatula GN=MTR_3g070100 PE=4 SV=1	0	87.653	36	15	37	15	1	387	41.9	6.87	130.31	15	Not Found	Not Found	High	High	High	High	High	High		0		0
High	Master Protein	G7KXA9	Aminopeptidase OS=Medicago truncatula GN=MTR_7g084200 PE=4 SV=1	0	87.635	23	12	27	12	1	491	56.7	5.55	99.49	12	Not Found	Not Found	High	High	High	High	High	High		0		0
High	Master Protein	B7FLW8	40S ribosomal protein S3a OS=Medicago truncatula GN=MTR_1g103100 PE=2 SV=1	0	87.42	39	14	35	6	1	261	29.7	9.82	149.36	14	Medium	Not Found	High	High	High	High	High	Not Found		0		0
High	Master Protein	G7INT9	Chlorophyll a-b binding protein, chloroplastic OS=Medicago truncatula GN=MTR_2g008610 PE=3 SV=1	0	87.259	28	9	59	9	1	261	27.7	6.6	257.43	9	High	High	High	High	High	High	High	High	Deamidated [Q195; R226]; Phospho [T192]	1	Phospho [T192]	0
High	Master Protein	A0A072UGG8	Heat shock 70 kDa protein OS=Medicago truncatula GN=MTR_4g012050 PE=3 SV=1	0	87.207	23	16	25	13	1	851	93.7	5.25	100.13	16	Not Found	High	High	High	High	High	High	High		0		0
High	Master Protein	G7ISD7	Ribosomal protein L15 OS=Medicago truncatula GN=MTR_2g014220 PE=3 SV=1	0	86.949	48	18	67	17	1	252	29.7	11.52	216.18	18	High	High	High	High	High	High	High	High	Deamidated [R191]	0		0
High	Master Protein	G7JTD2	Ribulose bisphosphate carboxylase/oxygenase activase OS=Medicago truncatula GN=MTR_4g021210 PE=4 SV=1	0	86.841	26	16	35	3	1	476	52.1	5.62	110.87	16	Not Found	High	High	High	Not Found	Not Found	High	Not Found	Deamidated [Q404; Q406; R411]	0		0
High	Master Protein	G7JX26	CHUP1-like protein OS=Medicago truncatula GN=MTR_5g053270 PE=4 SV=1	0	86.307	20	19	27	19	1	997	111.2	5.44	95	19	High	High	High	High	High	High	High	High		0		0
High	Master Protein	G7LDE8	Pigment defective 320 protein, putative OS=Medicago truncatula GN=MTR_8g009290 PE=4 SV=1	0	86.248	31	15	38	15	1	465	52.2	8.59	124.74	15	Not Found	High	High	High	High	High	High	High		0		0
High	Master Protein	A0A072TQ03	Calcium-dependent lipid-binding (CaLB domain) family protein OS=Medicago truncatula GN=MTR_8g031270 PE=4 SV=1	0	86.125	23	16	26	15	1	1003	114.3	9.09	104.88	16	Not Found	Not Found	High	High	High	High	High	High		0		0
High	Master Protein	B7FKN6	Tyrosine phosphatase, putative OS=Medicago truncatula GN=MTR_8g088420 PE=2 SV=1	0	86.065	44	19	38	19	1	335	37.5	6.65	124.35	19	Not Found	High	High	High	High	High	High	High		0		0
High	Master Protein	G7L9S8	Cytoplasmic phosphoglucomutase OS=Medicago truncatula GN=MTR_8g104540 PE=4 SV=1	0	85.809	28	16	32	16	1	654	71.4	6.34	110.6	16	Not Found	High	High	High	High	High	High	High		0		0
High	Master Protein	G7I549	26S proteasome non-ATPase regulatory subunit-like protein OS=Medicago truncatula GN=MTR_1g009010 PE=4 SV=1	0	85.67	30	12	21	7	1	421	46.9	6.48	83.57	12	Not Found	Not Found	High	High	Not Found	High	High	High		0		0
High	Master Protein	A0A072V604	Multidrug resistance protein ABC transporter family protein OS=Medicago truncatula GN=MTR_2g436680 PE=4 SV=1	0	85.092	10	13	26	2	1	1498	167.3	7.99	97.29	13	Not Found	High	Not Found	Not Found	High	High	Not Found	Not Found	Deamidated [Q1346]	0		0
High	Master Protein	A0A072U7I8	Chlorophyll a-b binding protein, chloroplastic OS=Medicago truncatula GN=MTR_6g033320 PE=3 SV=1	0	84.617	21	7	49	7	1	242	26.4	7.02	203.06	7	High	High	High	High	High	High	High	High		0		0
High	Master Protein	G7L5V0	Tubulin beta chain OS=Medicago truncatula GN=MTR_7g089120 PE=3 SV=1	0	84.546	32	12	37	2	1	449	50.5	4.83	160.09	12	Not Found	Not Found	Not Found	High	Not Found	Not Found	High	High		0		0
High	Master Protein	G7JX40	Serine/Threonine kinase domain protein OS=Medicago truncatula GN=MTR_5g053450 PE=4 SV=1	0	84.522	25	19	45	19	1	575	64.9	9.47	134.75	19	High	High	High	High	High	High	High	High		0		0
High	Master Protein	G7JSR5	p-loop nucleoside triphosphate hydrolase superfamily protein OS=Medicago truncatula GN=MTR_4g077880 PE=4 SV=1	0	84.456	26	14	32	12	1	613	67.9	9.1	107.9	14	Not Found	High	High	High	High	High	High	High	Deamidated [R336; Q418]	0		0
High	Master Protein	A0A072UR85	DUF21 domain plant protein OS=Medicago truncatula GN=MTR_4g117360 PE=4 SV=1	0	84.208	35	15	25	10	1	492	53.6	6.04	94.51	15	High	High	High	High	High	High	High	High		0		0
High	Master Protein	A0A072U593	Gamma carbonic anhydrase-like protein OS=Medicago truncatula GN=MTR_8g096820 PE=4 SV=1	0	84.196	38	12	49	12	1	253	27.8	7.56	201.23	12	High	High	High	High	High	High	High	High		0		0
High	Master Protein	A0A072TPW7	Phosphoenolpyruvate carboxylase OS=Medicago truncatula GN=MTR_8g463920 PE=3 SV=1	0	84.195	18	17	25	10	1	967	110.5	5.88	94.75	17	Not Found	Not Found	High	High	High	High	High	High		0		0
High	Master Protein	G7L3M7	LRR receptor-like kinase OS=Medicago truncatula GN=MTR_7g077150 PE=4 SV=1	0	84.009	29	13	31	6	1	492	55.1	5.48	135.62	13	Not Found	High	High	Not Found	Not Found	High	High	High		0		0
High	Master Protein	A0A072VB19	Calcium-binding EF-hand protein OS=Medicago truncatula GN=MTR_2g078240 PE=3 SV=1	0	84.005	20	11	47	11	1	443	49.4	5.78	187.03	11	High	High	High	High	High	High	High	High	Carboxymethyl [C229]; Phospho [T249]	1	Phospho [T249]	0
High	Master Protein	A0A072VGP8	Transmembrane protein, putative OS=Medicago truncatula GN=MTR_1g039490 PE=4 SV=1	0	83.768	31	13	39	13	1	318	35.5	9.48	154.51	13	High	High	High	High	High	High	High	High		0		0
High	Master Protein	A0A072TLJ4	Protein ROOT HAIR DEFECTIVE 3 homolog OS=Medicago truncatula GN=MTR_8g016310 PE=3 SV=1	0	83.751	21	16	29	15	1	819	91	5.91	110.68	16	Not Found	High	High	High	High	High	High	High		0		0
High	Master Protein	A2Q689	DEAD-box ATP-dependent RNA helicase OS=Medicago truncatula GN=MTR_2g039960 PE=3 SV=1	0	83.611	39	13	37	4	1	413	46.8	5.48	121.86	13	Not Found	Not Found	High	High	High	Not Found	High	Not Found		0		0
High	Master Protein	A0A072TXL0	Monodehydroascorbate reductase OS=Medicago truncatula GN=MTR_7g034715 PE=4 SV=1	0	83.414	33	16	36	16	1	483	52.2	8.02	127.12	16	High	High	High	High	High	High	High	High	Carboxymethyl [C142]	0		0
High	Master Protein	Q946J9	Aquaporin protein PIP1;1 OS=Medicago truncatula GN=PIP1;1 PE=2 SV=1	0	82.824	40	10	31	6	1	289	30.9	8.41	136.53	10	High	High	High	High	High	High	High	High		0		0
High	Master Protein	A0A072UQ87	Copper-transporting ATPase PAA1, putative OS=Medicago truncatula GN=MTR_4g094232 PE=3 SV=1	0	82.571	17	12	26	12	1	943	100	8.32	114.28	12	High	Not Found	High	High	High	High	High	High		0		0
High	Master Protein	G7LDH0	Dynamin 1E-like protein OS=Medicago truncatula GN=MTR_8g009510 PE=3 SV=1	0	82.453	37	21	30	13	1	637	71.4	6.57	106.44	21	Not Found	High	High	High	High	High	Not Found	High		0		0
High	Master Protein	A0A072TRX1	LRR receptor-like kinase OS=Medicago truncatula GN=MTR_8g070880 PE=3 SV=1	0	82.357	16	14	28	14	1	966	106.4	6.15	115.96	14	Not Found	Not Found	High	High	High	High	High	High		0		0
High	Master Protein	A0A072U125	LRR receptor-like kinase, putative OS=Medicago truncatula GN=MTR_8g461110 PE=4 SV=1	0	82.282	18	14	41	12	1	1031	113.3	6.24	145.49	14	Not Found	High	High	High	High	High	High	High		0		0
High	Master Protein	G7KK36	ERD (Early-responsive to dehydration stress) family protein OS=Medicago truncatula GN=MTR_4g132570 PE=4 SV=1	0	82.204	13	12	29	12	1	774	88.2	9.19	116.61	12	Not Found	High	High	High	High	High	High	High		0		0
High	Master Protein	G7JCM9	Phospholipase A1 OS=Medicago truncatula GN=MTR_4g080100 PE=4 SV=1	0	82.182	31	12	34	12	1	442	49.9	5.88	107.4	12	Not Found	Not Found	Not Found	High	High	High	High	High		0		0
High	Master Protein	A0A072UUL3	Beta-amylase OS=Medicago truncatula GN=MTR_4g045667 PE=3 SV=1	0	82.18	29	11	19	11	1	496	56.2	5.35	101.87	11	Not Found	High	High	High	High	High	High	High		0		0
High	Master Protein	G7J2R6	110 kDa 4SNc-tudor domain protein OS=Medicago truncatula GN=MTR_3g098420 PE=4 SV=1	0	81.974	21	17	23	17	1	992	108.2	6.98	85.23	17	Not Found	High	High	High	High	High	High	High		0		0
High	Master Protein	B7FMK2	Archaeal/vacuolar-type H+-ATPase subunit E OS=Medicago truncatula GN=MTR_5g009720 PE=2 SV=1	0	81.242	59	18	52	18	1	230	26.4	7.02	166.35	18	High	High	High	High	High	High	High	High		0		0
High	Master Protein	A0A072TNC4	Syntaxin of plants protein OS=Medicago truncatula GN=MTR_8g031190 PE=4 SV=1	0	81.129	64	13	23	2	1	229	25.6	8.27	93.55	13	Not Found	Not Found	High	Not Found	Not Found	Not Found	Not Found	Not Found	Deamidated [Q132; R133]	0		0
High	Master Protein	G7JQ41	Putative plant SNARE-like protein OS=Medicago truncatula GN=MTR_4g123910 PE=4 SV=1	0	81.082	36	12	29	5	1	269	30.1	6.62	109.76	12	Not Found	High	Not Found	Not Found	High	High	High	High		0		0
High	Master Protein	G7KGA4	FG-GAP repeat protein OS=Medicago truncatula GN=MTR_5g021150 PE=4 SV=2	0	81.035	23	14	27	14	1	697	77.6	7.93	103	14	High	High	High	High	High	High	High	High		0		0
High	Master Protein	G7L8S9	Leucine zipper EF-hand transmembrane protein OS=Medicago truncatula GN=MTR_8g088580 PE=4 SV=2	0	80.893	21	13	36	10	1	724	82.3	5.77	115.95	13	High	Not Found	High	High	High	High	High	High		0		0
High	Master Protein	G7JYQ8	Aconitate hydratase OS=Medicago truncatula GN=MTR_5g022940 PE=3 SV=1	0	80.809	23	18	36	13	1	901	98.3	6.55	110.08	18	Not Found	Not Found	High	High	High	High	High	High	Phospho [S166]	1	Phospho [S166]	0
High	Master Protein	G7JPU6	NAD-dependent aldehyde dehydrogenase family protein OS=Medicago truncatula GN=MTR_4g107040 PE=3 SV=2	0	80.384	26	16	28	13	1	544	59.2	8.13	94.45	16	Not Found	High	High	High	High	Not Found	High	High		0		0
High	Master Protein	G7J2W0	26S proteasome non-ATPase regulatory subunit-like protein OS=Medicago truncatula GN=MTR_3g109300 PE=4 SV=1	0	80.151	14	9	14	4	1	671	75.2	7.93	71.98	9	Not Found	Not Found	High	Not Found	Not Found	High	High	Not Found		0		0
High	Master Protein	A0A072UVP0	ABC-type transport system protein OS=Medicago truncatula GN=MTR_3g040090 PE=4 SV=1	0	80.001	30	11	31	11	1	446	48.9	7.01	132.86	11	Not Found	Not Found	High	High	High	High	High	High		0		0
High	Master Protein	A0A072VPV6	60S ribosomal protein L7 OS=Medicago truncatula GN=MTR_1g022385 PE=4 SV=1	0	79.821	44	18	57	2	1	275	32.3	9.83	179.66	18	Not Found	Not Found	High	High	Not Found	Not Found	Not Found	Not Found		0		0
High	Master Protein	A0A072U6J8	ABC transporter B family protein OS=Medicago truncatula GN=MTR_6g011680 PE=4 SV=1	0	79.793	18	18	31	16	1	1250	136.3	8.02	104.84	18	High	High	High	High	High	High	High	High	Deamidated [Q1225]	0		0
High	Master Protein	G7LBI9	Import receptor subunit TOM40-like protein OS=Medicago truncatula GN=MTR_8g106010 PE=4 SV=1	0	79.564	40	9	22	9	1	307	34.1	7.83	92.4	9	Not Found	Not Found	High	High	High	High	High	High	Carboxymethyl [C270]	0		0
High	Master Protein	G7JLT2	40S ribosomal protein S4 OS=Medicago truncatula GN=MTR_4g014590 PE=3 SV=1	0	79.491	52	16	71	1	1	264	29.9	10.29	209.49	16	Not Found	Not Found	Not Found	High	High	Not Found	Not Found	Not Found		0		0
High	Master Protein	G7KRV2	TPR repeat protein OS=Medicago truncatula GN=MTR_7g108590 PE=4 SV=1	0	79.397	41	21	44	21	1	446	49.8	9.07	133.1	21	Not Found	High	High	High	High	High	High	High		0		0
High	Master Protein	G7IPG7	UDP-glucose:glycoprotein glucosyltransferase OS=Medicago truncatula GN=MTR_2g006960 PE=4 SV=2	0	79.31	14	17	24	17	1	1631	185	5.9	81.37	17	Not Found	High	High	High	High	High	High	High		0		0
High	Master Protein	G7JC39	Methyltransferase PMT26-like protein, putative OS=Medicago truncatula GN=MTR_3g096480 PE=4 SV=1	0	79.116	20	10	20	7	1	789	88.9	5.19	89.31	10	High	High	Not Found	Not Found	High	High	High	High		0		0
High	Master Protein	A0A072UCB4	Vacuolar H+-ATPase subunit C OS=Medicago truncatula GN=MTR_7g083720 PE=4 SV=1	0	78.983	32	13	23	13	1	386	43.8	5.78	94.51	13	High	High	High	High	High	High	High	High		0		0
High	Master Protein	A0A072TMJ9	Non-specific phospholipase C4 OS=Medicago truncatula GN=MTR_8g010590 PE=4 SV=1	0	78.785	30	11	16	11	1	523	59	5.72	75.4	11	Not Found	Not Found	Not Found	Not Found	High	High	High	High		0		0
High	Master Protein	Q2MJ09	Coumarate 4-hydroxylase OS=Medicago truncatula GN=CYP73A3 PE=2 SV=1	0	78.711	29	15	31	15	1	506	58.1	9.04	103.16	15	Not Found	High	High	High	High	High	High	High		0		0
High	Master Protein	G7L2L3	NADH-cytochrome b5 reductase OS=Medicago truncatula GN=MTR_7g087090 PE=2 SV=1	0	78.602	40	12	41	11	1	278	30.8	8.22	153.14	12	High	High	High	High	High	High	High	High		0		0
High	Master Protein	G7J8L3	MLO-like protein OS=Medicago truncatula GN=MLO PE=3 SV=1	0	78.523	18	7	21	7	1	517	58.4	8.95	110.42	7	High	High	Not Found	High	High	High	High	High		0		0
High	Master Protein	I3SHA1	60S ribosomal protein L17A OS=Medicago truncatula GN=MTR_8g080460 PE=2 SV=1	0	78.455	50	12	29	5	1	173	19.8	10.27	104.24	12	High	High	Not Found	Not Found	Not Found	High	High	Not Found		0		0
High	Master Protein	G7INB7	ABA-responsive protein OS=Medicago truncatula GN=MTR_2g035320 PE=2 SV=1	0	78.267	75	11	35	5	1	157	16.6	5.08	140.14	11	High	High	High	High	High	High	High	High		0		0
High	Master Protein	A0A072V1D7	Calmodulin-domain kinase CDPK protein OS=Medicago truncatula GN=MTR_4g107490 PE=4 SV=1	0	78.266	20	11	22	8	1	555	63	6.81	94.92	11	Not Found	High	High	High	High	High	Not Found	High		0		0
High	Master Protein	G7JSU8	Callose synthase-like protein OS=Medicago truncatula GN=MTR_4g078220 PE=4 SV=1	0	78.058	9	13	27	7	1	1815	211.6	8.98	106.91	13	Not Found	Not Found	High	High	High	High	High	Not Found		0		0
High	Master Protein	G7JC76	Neutral alpha-glucosidase OS=Medicago truncatula GN=MTR_3g096870 PE=3 SV=1	0	78.017	23	16	25	16	1	912	103.7	6.19	105.08	16	Not Found	High	High	High	High	High	High	High		0		0
High	Master Protein	G7IAA3	Isocitrate dehydrogenase [NAD] subunit, mitochondrial OS=Medicago truncatula GN=MTR_1g064070 PE=3 SV=1	0	77.927	32	13	23	8	1	358	39.5	7.53	77.9	13	Not Found	Not Found	Not Found	High	High	High	High	High		0		0
High	Master Protein	G7J4K7	TPR domain protein OS=Medicago truncatula GN=MTR_3g100100 PE=4 SV=1	0	77.9	38	8	32	8	1	223	24.5	8.85	149.77	8	High	Medium	High	High	High	High	High	High		0		0
High	Master Protein	B7FHS4	CSL zinc finger protein OS=Medicago truncatula GN=MTR_1g056390 PE=2 SV=1	0	77.871	32	9	30	9	1	240	26.3	9.07	133.16	9	Not Found	High	High	High	High	High	High	High	Deamidated [Q79]	0		0
High	Master Protein	G7IRS0	Major intrinsic protein (MIP) family transporter OS=Medicago truncatula GN=MTR_2g094270 PE=3 SV=1	0	77.866	32	9	65	6	1	287	30.8	7.8	202.07	9	High	High	High	High	High	High	High	High	Phospho [S282]; Deamidated [R155]	0		0
High	Master Protein	A0A072U3J5	White-brown-complex ABC transporter family protein OS=Medicago truncatula GN=MTR_7g106880 PE=4 SV=1	0	77.831	14	10	27	3	1	732	81.4	8.88	106.95	10	Not Found	Not Found	High	High	High	High	High	High		0		0
High	Master Protein	G7KXA6	Cytochrome b-c1 complex subunit Rieske, mitochondrial OS=Medicago truncatula GN=MTR_7g084150 PE=4 SV=1	0	77.719	31	8	35	8	1	273	30.2	8.82	149.95	8	Not Found	High	High	High	High	High	High	High		0		0
High	Master Protein	G7KK18	p-loop nucleoside triphosphate hydrolase superfamily protein OS=Medicago truncatula GN=MTR_6g009540 PE=3 SV=2	0	77.631	30	17	30	12	1	518	60.5	8.02	109.71	17	High	High	High	Not Found	Not Found	High	High	High		0		0
High	Master Protein	I3SG23	SPFH/band 7/PHB domain membrane-associated family protein OS=Medicago truncatula GN=MTR_6g460470 PE=2 SV=1	0	77.576	33	13	49	13	1	292	32.4	5.01	168.69	13	High	Medium	High	High	High	High	High	High		0		0
High	Master Protein	G7J6G0	Tonoplast monosaccharide transporter 2 OS=Medicago truncatula GN=MTR_3g116060 PE=3 SV=1	0	77.575	12	8	25	7	1	730	78.2	5.55	128.48	8	Not Found	Not Found	Not Found	High	High	High	High	High		0		0
High	Master Protein	G7JCN3	Aspartate aminotransferase OS=Medicago truncatula GN=MTR_4g080140 PE=4 SV=1	0	77.385	31	9	20	9	1	424	47.3	8.02	87.93	9	High	High	High	High	High	High	High	High		0		0
High	Master Protein	G7KN60	Small GTPase family RAB protein OS=Medicago truncatula GN=MTR_6g021790 PE=4 SV=1	0	77.367	56	13	31	5	1	211	23.2	7.34	126.48	13	High	Not Found	Not Found	High	High	Not Found	Not Found	High	Deamidated [Q154]; Phospho [T152]	1	Phospho [T152]	0
High	Master Protein	Q2HTY1	FAD-dependent pyridine nucleotide-disulphide oxidoreductase; Calcium-binding EF-hand OS=Medicago truncatula GN=MTR_4g091240 PE=4 SV=1	0	77.329	24	18	40	18	1	578	65.4	8.02	128.26	18	High	High	High	High	High	High	High	High		0		0
High	Master Protein	G7IQZ2	LRR receptor-like kinase OS=Medicago truncatula GN=MTR_2g075250 PE=4 SV=1	0	77.195	18	16	33	10	1	1011	111.6	6.57	114.08	16	Not Found	Not Found	High	High	High	High	High	High		0		0
High	Master Protein	G7JA07	Phosphoinositide phospholipase C OS=Medicago truncatula GN=MTR_3g069280 PE=4 SV=1	0	77.085	22	14	49	1	1	572	64.9	5.4	172.78	14	Not Found	Not Found	Not Found	Not Found	Not Found	High	Not Found	Not Found		0		0
High	Master Protein	G7J8V4	Unusual kinase, putative OS=Medicago truncatula GN=MTR_3g082750 PE=4 SV=1	0	77.083	23	18	31	18	1	708	80.4	9.14	110.84	18	Not Found	High	High	High	High	High	High	High		0		0
High	Master Protein	A0A072UXU6	ADP/ATP carrier protein OS=Medicago truncatula GN=MTR_4g078545 PE=3 SV=1	0	77.063	37	17	63	5	1	371	39.8	9.76	184.59	17	High	High	High	High	High	High	High	High	Carboxymethyl [C121]	0		0
High	Master Protein	A0A072VQL5	Cytochrome b5-like heme/steroid-binding domain protein OS=Medicago truncatula GN=MTR_1g100727 PE=3 SV=1	0	76.994	51	10	22	7	1	220	24.2	4.61	90.54	10	High	High	High	High	High	High	Not Found	Not Found		0		0
High	Master Protein	A0A072TYI2	ABC transporter B family protein OS=Medicago truncatula GN=MTR_7g023340 PE=4 SV=1	0	76.965	10	11	16	5	1	1404	155.5	6.35	64.45	11	Not Found	High	Not Found	Not Found	Not Found	High	High	Not Found		0		0
High	Master Protein	I3SYR8	Adenine nucleotide alpha hydrolase superfamily protein OS=Medicago truncatula GN=MTR_4g064933 PE=2 SV=1	0	76.872	59	10	32	9	1	164	17.8	6.95	135.7	10	High	High	Not Found	High	High	High	High	High	Deamidated [R49]	0		0
High	Master Protein	G7KNY7	Cyclic nucleotide-binding domain protein OS=Medicago truncatula GN=MTR_6g087000 PE=3 SV=2	0	76.803	19	17	25	17	1	1072	119.5	5.07	90.18	17	Not Found	High	High	High	High	High	High	High		0		0
High	Master Protein	A0A072UKK0	Secretory carrier-associated membrane protein OS=Medicago truncatula GN=MTR_4g046110 PE=3 SV=1	0	76.693	27	8	19	7	1	306	34.2	8.22	91.74	8	Not Found	High	High	High	High	High	High	Not Found		0		0
High	Master Protein	A0A072VAK2	Chlorophyll a-b binding protein, chloroplastic OS=Medicago truncatula GN=MTR_2g081090 PE=3 SV=1	0	76.684	30	8	67	2	1	237	25.8	5.08	248.5	8	High	High	High	High	High	High	High	High		0		0
High	Master Protein	I3SI55	Light harvesting-like protein OS=Medicago truncatula GN=MTR_4g099340 PE=2 SV=1	0	76.671	45	11	33	11	1	258	28.8	6.54	121.7	11	High	High	High	High	High	High	High	High	Deamidated [R132; R133]	0		0
High	Master Protein	G7JVF8	Histone H4 OS=Medicago truncatula GN=MTR_4g128150 PE=3 SV=2	0	76.637	16	14	29	14	1	383	43.3	9.42	122.5	14	Not Found	High	Not Found	High	High	High	High	High	Deamidated [R68]	0		0
High	Master Protein	A0A072TLT0	Transmembrane 9 superfamily member OS=Medicago truncatula GN=MTR_8g016270 PE=3 SV=1	0	76.609	17	11	37	11	1	648	74.5	8.18	137.85	11	High	Not Found	High	High	High	High	High	High	Deamidated [R190]	0		0
High	Master Protein	I3SXG8	Photosystem I reaction center subunit IV A OS=Medicago truncatula GN=MTR_1g069235 PE=2 SV=1	0	76.47	55	8	78	7	1	148	15.5	9.82	298.07	8	High	High	High	High	High	High	High	High	Deamidated [Q114]	0		0
High	Master Protein	A0A072VB39	NAD(P)H-quinone oxidoreductase subunit M OS=Medicago truncatula GN=MTR_3g088645 PE=4 SV=1	0	76.197	43	10	44	10	1	214	24.6	5.68	148.08	10	High	High	High	High	High	High	High	High		0		0
High	Master Protein	A0A072V2G4	Dihydrolipoamide acetyltransferase component of pyruvate dehydrogenase complex OS=Medicago truncatula GN=MTR_4g120220 PE=3 SV=1	0	76.149	23	13	28	13	1	520	57.1	6.65	113.33	13	Not Found	Not Found	High	High	High	High	High	High		0		0
High	Master Protein	A0A072VCT7	Tyrosine kinase family protein OS=Medicago truncatula GN=MTR_1g012610 PE=4 SV=1	0	76.068	31	15	24	15	1	641	71.3	8.06	90.71	15	Not Found	High	High	High	High	High	High	High		0		0
High	Master Protein	G7KZJ5	Photosystem I reaction center subunit IV A OS=Medicago truncatula GN=MTR_7g099390 PE=2 SV=1	0	76.024	54	7	55	6	1	138	15	9.5	220.49	7	High	High	High	High	High	High	High	High	Deamidated [Q104; R109; R115]	0		0
High	Master Protein	G7II77	Pti1-like kinase OS=Medicago truncatula GN=MTR_2g103950 PE=3 SV=1	0	75.802	32	12	29	11	1	367	41	6.25	100.1	12	Not Found	High	High	High	High	High	High	High		0		0
High	Master Protein	I3S3S0	Cytosolic triosephosphate isomerase OS=Medicago truncatula GN=MTR_2g096940 PE=2 SV=1	0	75.669	36	10	26	9	1	253	27.2	5.92	117.78	10	Not Found	Not Found	High	High	High	High	High	High		0		0
High	Master Protein	B7FMK4	40S ribosomal protein S24 OS=Medicago truncatula GN=MTR_1g081410 PE=2 SV=1	0	75.554	36	7	30	7	1	137	15.7	10.64	133.7	7	Not Found	High	High	High	High	High	High	High		0		0
High	Master Protein	G7IDU4	Protein disulfide isomerase-like protein OS=Medicago truncatula GN=MTR_1g087520 PE=3 SV=2	0	75.428	37	13	32	11	1	364	40.4	5.49	129.11	13	High	High	High	High	High	High	High	High		0		0
High	Master Protein	A0A072TM25	Patatin OS=Medicago truncatula GN=MTR_8g007065 PE=3 SV=1	0	75.381	32	14	32	14	1	422	45.9	5.03	103.8	14	High	High	High	High	High	High	High	High	Deamidated [Q272]	0		0
High	Master Protein	A0A072UNM0	60S ribosomal protein L3B OS=Medicago truncatula GN=MTR_4g094398 PE=3 SV=1	0	75.38	30	19	64	4	1	389	44.5	10.18	180.5	19	Not Found	Not Found	Not Found	High	High	High	High	High	Deamidated [Q272]	0		0
High	Master Protein	G7JFF5	Calcium-dependent lipid-binding (CaLB domain) family protein OS=Medicago truncatula GN=MTR_4g115660 PE=4 SV=1	0	75.361	27	14	29	14	1	566	63.5	6.33	95.34	14	Not Found	High	High	High	Not Found	High	High	High		0		0
High	Master Protein	G7I390	Endoplasmic reticulum metallopeptidase-like protein OS=Medicago truncatula GN=MTR_1g095040 PE=4 SV=2	0	75.198	19	15	34	15	1	912	99.3	7.05	129.47	15	High	Not Found	Not Found	High	High	High	High	High		0		0
High	Master Protein	G7JYX3	ABC transporter B family protein OS=Medicago truncatula GN=MTR_5g033080 PE=4 SV=2	0	75.188	21	15	30	15	1	701	78.7	7.84	120.68	15	Not Found	High	High	High	High	High	High	High		0		0
High	Master Protein	A0A072TJV4	Photosystem II CP47 reaction center protein OS=Medicago truncatula GN=MTR_0002s0740 PE=3 SV=1	0	75.173	25	15	103	2	1	508	56.1	6.54	283.37	15	Not Found	Not Found	Not Found	Not Found	Not Found	High	Not Found	Not Found	Deamidated [Q274; Q277; R423; Q425]	0		0
High	Master Protein	G7K1K2	Alpha/beta-hydrolase superfamily protein OS=Medicago truncatula GN=MTR_5g056550 PE=4 SV=1	0	74.858	29	12	30	12	1	395	44.7	8.31	126.02	12	Not Found	High	High	High	High	High	High	High		0		0
High	Master Protein	B7FGX7	Transmembrane protein, putative OS=Medicago truncatula GN=MTR_5g007210 PE=2 SV=1	0	74.846	40	10	50	10	1	163	18	10.17	200.19	10	Not Found	High	High	High	High	High	High	High		0		0
High	Master Protein	G7KJH1	Alpha-mannosidase OS=Medicago truncatula GN=MTR_6g008850 PE=3 SV=2	0	74.792	18	19	27	18	1	1150	132	7.91	85.13	19	Not Found	High	High	High	High	High	High	High		0		0
High	Master Protein	G7KRX3	Auxin transporter BIG OS=Medicago truncatula GN=MTR_7g017100 PE=4 SV=2	0	74.75	4	17	20	17	1	5101	566.6	6.14	67.79	17	Not Found	High	High	High	High	High	High	High		0		0
High	Master Protein	A0A072VL01	Succinate-CoA ligase subunit beta OS=Medicago truncatula GN=MTR_1g069645 PE=3 SV=1	0	74.513	43	15	32	15	1	421	45.1	5.91	115.61	15	High	High	High	High	High	High	High	High		0		0
High	Master Protein	G7JPW9	SPFH/band 7/PHB domain membrane-associated family protein OS=Medicago truncatula GN=MTR_4g107810 PE=4 SV=1	0	74.347	35	14	45	7	1	346	38.5	8.09	150.6	14	Not Found	High	Not Found	High	Not Found	High	High	High		0		0
High	Master Protein	A0A072V8Z3	Adenylate kinase OS=Medicago truncatula GN=MTR_2g461290 PE=3 SV=1	0	74.24	25	12	20	12	1	593	66.4	8.06	67.61	12	High	High	High	High	High	High	High	High		0		0
High	Master Protein	G7I4W6	S-adenosylmethionine-dependent methyltransferase, putative OS=Medicago truncatula GN=MTR_1g075900 PE=4 SV=2	0	74.094	25	16	37	10	1	624	70.5	6.49	129.01	16	Not Found	Not Found	High	High	High	High	High	High	Deamidated [R315; Q330]	0		0
High	Master Protein	Q2HU72	Steroid nuclear receptor, ligand-binding OS=Medicago truncatula GN=MTR_7g031900 PE=4 SV=2	0	74.055	21	13	34	13	1	582	64.3	7.66	122.76	13	Not Found	High	High	High	High	High	High	High		0		0
High	Master Protein	G7JCU3	Peroxidase OS=Medicago truncatula GN=MTR_4g095450 PE=3 SV=1	0	74.016	32	11	24	11	1	323	35.4	8.92	94.93	11	Not Found	Not Found	High	High	High	High	High	High		0		0
High	Master Protein	G7IIU5	Uncharacterized protein OS=Medicago truncatula GN=MTR_2g049330 PE=4 SV=2	0	73.938	42	8	30	8	1	290	31.2	4.79	133.03	8	High	High	High	High	High	High	High	High		0		0
High	Master Protein	A0A072VDE6	26S proteasome regulatory particle triple-A ATPase protein OS=Medicago truncatula GN=MTR_3g112260 PE=3 SV=1	0	73.835	44	14	28	13	1	399	44.7	8.19	104.89	14	Not Found	High	High	High	High	High	High	High		0		0
High	Master Protein	G7IC41	Phosphogluco-mutase OS=Medicago truncatula GN=MTR_1g102010 PE=4 SV=1	0	73.83	30	15	23	15	1	631	69.5	6.25	89.86	15	Not Found	Not Found	Not Found	High	High	High	High	High		0		0
High	Master Protein	G7K1N3	LRR receptor-like kinase OS=Medicago truncatula GN=MTR_5g078080 PE=4 SV=1	0	73.681	27	18	33	15	1	632	69	7.64	100.84	18	High	Not Found	High	High	High	High	High	High		0		0
High	Master Protein	A0A072V740	Sucrose synthase OS=Medicago truncatula GN=MTR_2g044070 PE=3 SV=1	0	73.621	23	15	27	11	1	804	92.2	6.32	105	15	Not Found	Medium	Not Found	High	High	High	High	High		0		0
High	Master Protein	A0A072TX52	1-deoxy-D-xylulose 5-phosphate reductoisomerase OS=Medicago truncatula GN=MTR_8g012565 PE=3 SV=1	0	73.594	27	11	29	11	1	470	51.1	6.76	126.05	11	Not Found	High	High	High	High	High	High	High		0		0
High	Master Protein	G7IAS5	White-brown-complex ABC transporter family protein OS=Medicago truncatula GN=MTR_1g108340 PE=4 SV=2	0	73.542	19	10	32	10	1	725	79.4	8.07	137.01	10	Not Found	High	Not Found	High	High	High	High	High	Deamidated [R348]	0		0
High	Master Protein	A2Q4U4	Rhodanese-like OS=Medicago truncatula GN=MTR_7g092820 PE=2 SV=1	0	73.511	41	10	51	10	1	234	25.6	8.68	191.88	10	High	High	High	High	High	High	High	High	Carboxymethyl [C83]	0		0
High	Master Protein	G7K2K7	Tonoplast monosaccharide transporter 2 OS=Medicago truncatula GN=MTR_5g024740 PE=3 SV=2	0	73.305	17	8	20	8	1	726	77.5	5.17	98.36	8	Not Found	Not Found	High	High	High	High	High	High	Phospho [S384]	1	Phospho [S384]	0
High	Master Protein	Q1SL05	RAB GTPase-like protein A1D OS=Medicago truncatula GN=MTR_2g005510 PE=4 SV=1	0	73.274	55	14	29	9	1	220	24.3	7.84	111.1	14	High	High	High	High	High	High	High	Not Found		0		0
High	Master Protein	A0A072V9A7	Calcium-binding EF-hand protein OS=Medicago truncatula GN=MTR_2g078340 PE=4 SV=1	0	73.197	32	10	16	10	1	413	46.8	6.16	81.55	10	Not Found	High	High	High	High	High	High	High	Deamidated [Q58]	0		0
High	Master Protein	G7JC06	60S ribosomal protein L17A OS=Medicago truncatula GN=MTR_3g085490 PE=2 SV=1	0	73.18	48	12	29	5	1	182	20.7	10.36	106.04	12	High	High	High	High	High	High	High	Not Found		0		0
High	Master Protein	G7LHC6	Tubulin beta chain OS=Medicago truncatula GN=MTR_8g098360 PE=3 SV=1	0	73.097	25	10	35	3	1	445	49.9	4.94	144.31	10	Not Found	Not Found	High	High	High	Not Found	Not Found	Not Found	Deamidated [Q328; Q329]	0		0
High	Master Protein	A0A072U553	Calcium-dependent phospholipid-binding copine family protein OS=Medicago truncatula GN=MTR_8g096190 PE=4 SV=1	0	72.956	30	13	30	13	1	579	63.6	5.44	117.03	13	High	High	High	High	High	High	High	High		0		0
High	Master Protein	G7JLR1	Auxin-responsive family protein OS=Medicago truncatula GN=MTR_4g133620 PE=4 SV=1	0	72.871	25	6	15	6	1	399	43.5	8.92	75.06	6	Not Found	Not Found	Not Found	High	High	High	High	High		0		0
High	Master Protein	G7I8P7	26S proteasome regulatory particle triple-A ATPase protein OS=Medicago truncatula GN=MTR_1g083330 PE=3 SV=1	0	72.806	30	13	26	12	1	423	47.4	5.11	94.57	13	Not Found	High	High	High	High	High	High	High	Carboxymethyl [C265]; Deamidated [Q379]	0		0
High	Master Protein	G7KRL3	Calreticulin OS=Medicago truncatula GN=MTR_7g080370 PE=3 SV=1	0	72.804	34	13	21	11	1	421	49.3	5.88	69.7	13	Medium	High	High	High	High	High	High	High		0		0
High	Master Protein	A0A072U1Q8	Fructose-1,6-bisphosphatase OS=Medicago truncatula GN=MTR_7g066120 PE=3 SV=1	0	72.679	26	10	23	10	1	411	44.7	5.31	84.14	10	Not Found	Not Found	High	High	High	High	High	High		0		0
High	Master Protein	G7I9H2	Calreticulin OS=Medicago truncatula GN=MTR_1g083960 PE=2 SV=1	0	72.645	21	10	34	10	1	423	48.4	4.56	129.32	10	High	Not Found	High	High	High	High	High	High		0		0
High	Master Protein	A0A072UBH0	Linker histone H1 and h5 family protein OS=Medicago truncatula GN=MTR_6g079520 PE=4 SV=1	0	72.506	25	10	18	10	1	553	59.6	10.65	83.54	10	High	High	High	High	High	High	High	High		0		0
High	Master Protein	G7KEN2	Chlorophyll a-b binding protein, chloroplastic OS=Medicago truncatula GN=MTR_5g097280 PE=3 SV=1	0	72.424	44	8	129	4	1	265	28.7	5.44	465.1	8	High	High	High	High	High	High	High	High	Deamidated [R95]	0		0
High	Master Protein	A0A072VMU1	Outer envelope pore protein OS=Medicago truncatula GN=MTR_2g096900 PE=4 SV=1	0	72.275	45	7	35	7	1	147	15.3	8.94	152.7	7	High	High	High	High	High	High	High	High		0		0
High	Master Protein	G7IUL4	60S ribosomal L28-like protein OS=Medicago truncatula GN=MTR_2g100410 PE=4 SV=1	0	72.252	61	12	48	8	1	146	16.4	10.9	185.41	12	High	High	High	High	High	High	High	High	Deamidated [Q29]	0		0
High	Master Protein	G7K3Y7	Carotenoid cleavage dioxygenase 4a-6 OS=Medicago truncatula GN=MTR_5g025270 PE=4 SV=2	0	72.182	26	10	12	10	1	581	63.9	7.14	61.13	10	Not Found	High	Not Found	High	High	High	High	High		0		0
High	Master Protein	G7LAQ9	Serine/Threonine kinase domain protein OS=Medicago truncatula GN=MTR_8g005720 PE=4 SV=2	0	72.179	20	9	20	9	1	526	58.8	9.39	99.22	9	High	Not Found	High	Not Found	High	High	High	High		0		0
High	Master Protein	G7I4F8	Succinate dehydrogenase OS=Medicago truncatula GN=MTR_1g019810 PE=4 SV=2	0	72.072	30	7	13	7	1	238	26.2	6.3	67.1	7	Not Found	Not Found	High	High	High	High	High	High		0		0
High	Master Protein	G7JZK0	Asparagine synthetase [glutamine-hydrolyzing] protein OS=Medicago truncatula GN=MTR_5g071360 PE=4 SV=1	0	72.027	22	13	28	8	1	584	65.8	6.39	87.42	13	Not Found	Not Found	High	High	High	High	High	High	Deamidated [R85]	0		0
High	Master Protein	A0A072TJV0	Photosystem I P700 chlorophyll A apoprotein A2 OS=Medicago truncatula GN=MTR_0002s0580 PE=3 SV=1	0	71.923	9	14	109	1	1	1438	160.2	7.23	276.09	14	Not Found	Not Found	Not Found	Not Found	Not Found	High	Not Found	High	Carboxymethyl [C573]	0		0
High	Master Protein	G7KCE7	Plastid fibrillin OS=Medicago truncatula GN=MTR_5g029590 PE=4 SV=1	0	71.917	29	12	37	12	1	355	37.7	4.7	126.9	12	Not Found	High	High	High	High	High	High	High		0		0
High	Master Protein	A0A072VEI7	Porin/voltage-dependent anion-selective channel protein OS=Medicago truncatula GN=MTR_1g018205 PE=4 SV=1	0	71.893	44	10	35	10	1	277	29.7	8.97	122.24	10	Not Found	Not Found	Not Found	High	High	High	High	High		0		0
High	Master Protein	A0A072VJS5	Pyridine nucleotide-disulfide oxidoreductase OS=Medicago truncatula GN=MTR_1g060620 PE=4 SV=1	0	71.768	42	15	37	15	1	434	47	6.02	122.19	15	Not Found	High	High	High	High	High	High	High		0		0
High	Master Protein	G7JRI5	L-ascorbate peroxidase OS=Medicago truncatula GN=MTR_4g061140 PE=2 SV=1	0	71.668	44	9	28	9	1	250	27.1	5.81	109.98	9	Not Found	Not Found	High	High	High	High	High	High		0		0
High	Master Protein	G7L3L0	60S ribosomal L8-like protein OS=Medicago truncatula GN=MTR_7g076940 PE=2 SV=1	0	71.665	35	11	61	4	1	259	28	10.64	235.42	11	Not Found	High	High	High	High	High	High	High	Deamidated [R37]	0		0
High	Master Protein	A0A072VLV1	Plant/MNJ8-150 protein OS=Medicago truncatula GN=MTR_1g079763 PE=4 SV=1	0	71.6	26	8	37	8	1	311	33.4	8.75	171.51	8	High	High	Not Found	High	High	High	High	High		0		0
High	Master Protein	G7L350	Saccharopine dehydrogenase-like protein OS=Medicago truncatula GN=MTR_7g011890 PE=4 SV=1	0	71.549	41	10	13	9	1	450	48.9	8.63	63.03	10	Not Found	High	Not Found	High	High	High	High	High		0		0
High	Master Protein	G7LIV6	Acetyl-CoA carboxylase biotin carboxylase subunit OS=Medicago truncatula GN=MTR_8g101330 PE=2 SV=2	0	71.501	29	14	22	14	1	542	59.4	7.66	77.25	14	Not Found	Not Found	High	High	High	High	High	High		0		0
High	Master Protein	G7LGX8	Syntaxin of plants protein OS=Medicago truncatula GN=MTR_8g066340 PE=3 SV=1	0	71.477	54	12	24	7	1	274	30.1	6.32	89.03	12	Not Found	High	High	Not Found	High	High	High	High		0		0
High	Master Protein	B7FIH8	Trans-2-enoyl-CoA reductase OS=Medicago truncatula GN=MTR_5g087590 PE=2 SV=1	0	71.395	18	9	33	9	1	310	36	9.6	139.64	9	High	High	High	High	High	High	High	High		0		0
High	Master Protein	G7K7Q7	ABC-type transport system protein OS=Medicago truncatula GN=MTR_5g088340 PE=4 SV=2	0	71.334	31	11	20	11	1	382	42	9.07	91.14	11	Not Found	Not Found	High	High	High	High	High	High		0		0
High	Master Protein	G7JU55	Drug resistance transporter-like ABC domain protein OS=Medicago truncatula GN=MTR_4g113070 PE=3 SV=2	0	71.276	11	16	27	13	1	1418	161.3	8.37	86.17	16	High	High	High	High	High	High	High	High		0		0
High	Master Protein	A0A072VFQ6	ATP-dependent zinc metalloprotease FTSH protein OS=Medicago truncatula GN=MTR_1g028390 PE=3 SV=1	0	71.078	25	15	26	14	1	778	85.7	6.64	110.82	15	Not Found	High	High	High	High	High	High	High		0		0
High	Master Protein	G7IS29	Lipoxygenase OS=Medicago truncatula GN=MTR_2g099560 PE=3 SV=1	0	71.077	22	16	26	10	1	863	96.9	6.28	73.11	16	Not Found	High	High	High	High	High	High	High	Deamidated [R580; Q805; Q808]	0		0
High	Master Protein	Q2HRW5	Syntaxin of plants protein OS=Medicago truncatula GN=MTR_7g084590 PE=4 SV=1	0	71.017	33	9	16	9	1	266	29.6	6.16	66.87	9	Medium	Medium	High	High	High	High	High	Not Found		0		0
High	Master Protein	A0A072VMC4	Malate dehydrogenase OS=Medicago truncatula GN=MTR_1g076130 PE=3 SV=1	0	70.951	28	10	19	6	1	332	35.6	6.55	87.54	10	Not Found	Not Found	High	Not Found	Not Found	High	High	High		0		0
High	Master Protein	G7K882	Phosphoribulokinase OS=Medicago truncatula GN=MTR_5g027530 PE=3 SV=1	0	70.897	33	12	25	12	1	411	45.7	7.12	97.69	12	Medium	High	High	High	High	High	High	High	Deamidated [Q383]	0		0
High	Master Protein	A0A072UBG4	Phosphoinositide phosphatase SAC1 OS=Medicago truncatula GN=MTR_7g068890 PE=4 SV=1	0	70.89	26	13	21	13	1	591	67.6	6.8	91.87	13	Not Found	High	High	High	High	High	High	High		0		0
High	Master Protein	G7JD57	Diacylglycerol kinase OS=Medicago truncatula GN=MTR_4g129070 PE=3 SV=1	0	70.89	35	15	27	15	1	482	53.5	8.28	108.92	15	Not Found	Not Found	Not Found	High	High	High	High	High		0		0
High	Master Protein	Q2HUA3	Phospholipase D OS=Medicago truncatula GN=MTR_2g103730 PE=3 SV=1	0	70.864	18	12	19	12	1	809	92	5.8	83.95	12	Not Found	Not Found	High	High	High	High	High	High		0		0
High	Master Protein	A0A072TZJ4	RPM1 interacting protein 4 transcript protein OS=Medicago truncatula GN=MTR_7g056147 PE=4 SV=1	0	70.846	49	9	26	9	1	249	27.6	8.25	91.16	9	High	High	High	High	High	High	Not Found	Not Found	Phospho [S98; S101; S134]	3	Phospho [S98; S101; S134]	0
High	Master Protein	G7JFG1	NAD-dependent epimerase/dehydratase family protein OS=Medicago truncatula GN=MTR_4g115730 PE=2 SV=1	0	70.78	38	9	29	9	1	292	31.7	7.99	118.49	9	Not Found	Not Found	High	High	High	High	High	High		0		0
High	Master Protein	A0A072V1U6	DnaJ heat shock amino-terminal domain protein OS=Medicago truncatula GN=MTR_4g112045 PE=4 SV=1	0	70.754	7	13	16	13	1	2636	288	6.23	66.13	13	High	High	Not Found	High	High	High	High	High		0		0
High	Master Protein	B7FH72	NADH-ubiquinone reductase complex 1 MLRQ subunit OS=Medicago truncatula GN=MTR_3g078590 PE=2 SV=1	0	70.704	46	7	25	7	1	90	10.1	9.5	116.26	7	High	Not Found	High	High	High	High	High	High		0		0
High	Master Protein	G7J101	Ribosomal protein S7 OS=Medicago truncatula GN=MTR_3g035660 PE=3 SV=1	0	70.671	13	11	42	1	1	871	97.5	9.14	148.86	11	Not Found	Not Found	High	Not Found	Not Found	Not Found	Not Found	Not Found		0		0
High	Master Protein	G7KK02	LRR receptor-like kinase OS=Medicago truncatula GN=MTR_6g009370 PE=4 SV=1	0	70.524	22	12	31	12	1	602	66.6	6.74	108.7	12	High	High	High	High	High	High	High	High		0		0
High	Master Protein	G7J8I5	Heavy metal transport/detoxification superfamily protein OS=Medicago truncatula GN=MTR_3g117890 PE=4 SV=1	0	70.474	44	6	25	6	1	156	17.5	8.85	108.44	6	Not Found	High	High	High	High	High	High	High	Deamidated [Q125]	0		0
High	Master Protein	A0A072VIH3	3-ketoacyl-CoA thiolase 2, peroxisomal-like protein OS=Medicago truncatula GN=MTR_1g047210 PE=3 SV=1	0	70.408	28	10	27	8	1	462	48.3	7.99	106.59	10	Not Found	High	High	High	High	High	High	High		0		0
High	Master Protein	G7KCB8	Rossmann-fold NAD(P)-binding domain protein OS=Medicago truncatula GN=MTR_5g029260 PE=4 SV=1	0	70.366	29	8	23	8	1	302	32.3	5.69	124.41	8	Not Found	Not Found	Not Found	High	High	High	High	High	Carboxymethyl [C85]	0		0
High	Master Protein	G7L9Y0	Strubbelig-receptor family 6 protein OS=Medicago truncatula GN=MTR_8g023560 PE=4 SV=1	0	70.338	19	14	39	13	1	716	77.8	6.28	132.58	14	Not Found	High	High	High	High	High	High	High		0		0
High	Master Protein	Q8GV75	Auxin efflux carrier component OS=Medicago truncatula GN=PIN3 PE=3 SV=1	0	70.3	17	7	14	7	1	621	68.2	8.18	66.87	7	High	Not Found	High	High	High	High	High	High		0		0
High	Master Protein	A0A072UWD1	Alpha-1,4 glucan phosphorylase OS=Medicago truncatula GN=MTR_3g462340 PE=3 SV=1	0	70.143	20	13	21	13	1	840	95.4	5.88	76.79	13	High	Not Found	High	High	High	High	High	High		0		0
High	Master Protein	A0A072U3T1	Flavin-binding monooxygenase-like protein OS=Medicago truncatula GN=MTR_7g107710 PE=4 SV=1	0	70.101	36	10	16	10	1	384	43.1	8.54	82.24	10	Not Found	High	Not Found	Not Found	High	High	High	High		0		0
High	Master Protein	B7FGY5	Cytochrome b-c1 complex subunit 7 OS=Medicago truncatula GN=MTR_1g011880 PE=2 SV=1	0	69.737	66	10	30	10	1	122	14.4	9.45	110.87	10	Not Found	Not Found	Not Found	High	High	High	High	High		0		0
High	Master Protein	A0A072VTY6	Calmodulin-domain kinase CDPK protein OS=Medicago truncatula GN=MTR_1g052530 PE=4 SV=1	0	69.652	18	13	28	6	1	528	60.1	6.61	99.08	13	High	Not Found	High	High	High	Not Found	Not Found	High		0		0
High	Master Protein	G7IR60	Chlorophyll a-b binding protein, chloroplastic OS=Medicago truncatula GN=MTR_2g081090 PE=3 SV=1	0	69.649	28	7	47	1	1	264	28.5	5.64	182.31	7	Not Found	Not Found	Not Found	Not Found	Not Found	Not Found	Not Found	High		0		0
High	Master Protein	G7JLX3	Transmembrane protein, putative OS=Medicago truncatula GN=MTR_4g015010 PE=4 SV=1	0	69.642	17	7	16	7	1	275	31	4.93	85.82	7	Not Found	High	High	High	High	High	High	Not Found		0		0
High	Master Protein	G7IMU5	Ras-related small GTP-binding family protein OS=Medicago truncatula GN=MTR_2g034640 PE=2 SV=1	0	69.605	44	9	16	5	1	193	22.1	7.05	70.03	9	Not Found	Not Found	Not Found	High	High	High	High	Not Found		0		0
High	Master Protein	G7JHJ9	Uncharacterized protein OS=Medicago truncatula GN=MTR_4g083250 PE=2 SV=1	0	69.457	31	12	31	12	1	266	29.2	9.25	107.15	12	Not Found	Not Found	High	High	High	High	High	High	Deamidated [Q84]	0		0
High	Master Protein	G7J014	Serine-glyoxylate aminotransferase-like protein OS=Medicago truncatula GN=MTR_3g053890 PE=3 SV=1	0	69.376	27	12	32	11	1	408	45.2	7.17	110.36	12	Not Found	High	High	High	High	High	High	High	Deamidated [Q23]	0		0
High	Master Protein	A0A072U5K2	60S ribosomal protein L18-3 OS=Medicago truncatula GN=MTR_7g108805 PE=4 SV=1	0	69.301	36	8	28	5	1	188	21	11.11	125.67	8	Not Found	Not Found	Not Found	High	High	High	High	High		0		0
High	Master Protein	A0A072V3P1	Outer envelope pore protein OS=Medicago truncatula GN=MTR_4g134950 PE=4 SV=1	0	69.138	39	11	36	11	1	336	37.8	7.9	146.16	11	High	High	High	High	High	High	High	High	Deamidated [R40; R44]	0		0
High	Master Protein	A0A072V091	Translocase of chloroplast OS=Medicago truncatula GN=MTR_3g090160 PE=3 SV=1	0	69.047	46	14	33	3	1	332	36.7	9.17	107.2	14	Not Found	Not Found	Not Found	Not Found	High	High	Not Found	High		0		0
High	Master Protein	I3SYK2	Gamma carbonic anhydrase-like protein OS=Medicago truncatula GN=MTR_1g022405 PE=2 SV=1	0	68.947	48	10	23	6	1	272	29.6	6.43	106.62	10	Not Found	Not Found	Not Found	High	High	High	High	High		0		0
High	Master Protein	G7KWI2	Importin subunit alpha OS=Medicago truncatula GN=MTR_7g112350 PE=3 SV=2	0	68.769	20	8	12	6	1	532	58.8	5.17	60.76	8	Not Found	Not Found	High	High	High	High	High	Not Found		0		0
High	Master Protein	G7KIR6	Trypsin-like serine protease OS=Medicago truncatula GN=MTR_6g007030 PE=2 SV=1	0	68.653	26	12	22	12	1	432	45.8	7.3	84.68	12	Not Found	High	High	High	High	High	High	High	Deamidated [Q119]	0		0
High	Master Protein	G7KK16	p-loop nucleoside triphosphate hydrolase superfamily protein OS=Medicago truncatula GN=MTR_6g009520 PE=3 SV=1	0	68.644	25	14	32	7	1	520	60.7	7.06	109.19	14	Not Found	Not Found	Not Found	High	High	High	High	High		0		0
High	Master Protein	I3SGW0	Cytochrome b5-like heme/steroid-binding domain protein OS=Medicago truncatula GN=MTR_3g092095 PE=2 SV=1	0	68.549	50	6	35	6	1	134	15.2	5.33	149.95	6	High	High	High	High	High	High	High	High	Deamidated [R89]	0		0
High	Master Protein	Q2HTL7	Glycoprotein membrane GPI-anchored protein OS=Medicago truncatula GN=MTR_7g113640 PE=4 SV=1	0	68.44	33	8	45	8	1	195	21.4	5.77	139.28	8	High	High	High	High	High	High	High	High	Deamidated [Q76; Q87; R88; Q93]	0		0
High	Master Protein	A0A072V4H7	Uncharacterized protein OS=Medicago truncatula GN=MTR_3g114130 PE=4 SV=1	0	68.377	33	11	15	11	1	409	44.7	7.55	61.35	11	Not Found	High	Not Found	High	High	High	High	High		0		0
High	Master Protein	G7KDJ3	Succinate dehydrogenase [ubiquinone] flavoprotein subunit, mitochondrial OS=Medicago truncatula GN=MTR_5g020050 PE=3 SV=1	0	68.336	25	16	23	16	1	626	68.9	6.57	85.34	16	Not Found	High	High	High	High	High	High	High		0		0
High	Master Protein	G7J8J8	60S ribosomal protein L5-2 OS=Medicago truncatula GN=MTR_3g118030 PE=3 SV=2	0	68.331	29	13	45	1	1	300	34	8.92	157.33	13	Not Found	Not Found	High	High	High	Not Found	Not Found	Not Found		0		0
High	Master Protein	A0A072V8M0	Putative plant SNARE-like protein OS=Medicago truncatula GN=MTR_2g045960 PE=4 SV=1	0	68.318	32	10	31	3	1	265	29.8	7.87	103.5	10	Not Found	High	Not Found	Not Found	High	High	High	Not Found	Deamidated [Q171; Q179; Q182; R185]	0		0
High	Master Protein	A0A072VRW6	Uncharacterized protein OS=Medicago truncatula GN=MTR_1g115610 PE=4 SV=1	0	68.295	24	13	20	13	1	682	77	5.11	78.41	13	High	High	High	High	High	High	High	High		0		0
High	Master Protein	G7IAA1	PfkB family carbohydrate kinase OS=Medicago truncatula GN=MTR_1g064060 PE=4 SV=1	0	68.175	34	10	16	10	1	341	37.6	5.19	71.56	10	Not Found	High	High	High	High	High	High	High	Carboxymethyl [C268]	0		0
High	Master Protein	A0A072UNI9	White-brown-complex ABC transporter family protein OS=Medicago truncatula GN=MTR_4g076940 PE=4 SV=1	0	68.174	17	13	29	13	1	733	82	8.9	103.29	13	Not Found	High	High	High	High	High	High	High	Deamidated [R92]	0		0
High	Master Protein	G7KXB3	Tyrosine kinase family protein OS=Medicago truncatula GN=MTR_7g084250 PE=4 SV=1	0	68.169	32	13	21	13	1	379	42.4	7.27	80.1	13	Not Found	High	High	High	High	High	High	High		0		0
High	Master Protein	G7JEX0	Membrane-associated 30 kDa protein OS=Medicago truncatula GN=MTR_4g068210 PE=2 SV=1	0	68.142	37	13	24	13	1	319	35.1	9.5	89.76	13	Not Found	High	High	High	High	High	High	High		0		0
High	Master Protein	G7L8K5	Prohibitin complex protein OS=Medicago truncatula GN=MTR_8g046300 PE=4 SV=2	0	68.122	51	12	35	6	1	281	30.8	8.34	127.36	12	High	Not Found	High	Not Found	High	High	High	High		0		0
High	Master Protein	A0A072W2L8	Photosystem II reaction center PsbP family protein OS=Medicago truncatula GN=MTR_1g115410 PE=4 SV=1	0	68.11	56	14	32	14	1	234	27.1	8.51	103.02	14	Not Found	Not Found	Medium	High	High	High	High	High		0		0
High	Master Protein	G7KWF0	Fungal proteinase A, aspartic proteinase superfamily protein OS=Medicago truncatula GN=MTR_7g111530 PE=3 SV=2	0	68.042	20	10	30	10	1	511	56	6.61	129.99	10	Not Found	High	High	High	High	High	High	High		0		0
High	Master Protein	G7I882	Transmembrane protein, putative OS=Medicago truncatula GN=MTR_1g014110 PE=4 SV=1	0	68.026	51	4	18	4	1	107	11.3	9.44	108.62	4	Not Found	High	High	High	High	High	High	High	Deamidated [R32]	0		0
High	Master Protein	G7K7K0	LysM-domain receptor-like kinase OS=Medicago truncatula GN=MTR_5g085790 PE=4 SV=2	0	68.017	24	11	14	11	1	660	73.3	6.79	59.82	11	Not Found	High	High	High	High	High	High	High		0		0
High	Master Protein	A0A072UX31	NAD(P)H:quinone oxidoreductase, type IV protein OS=Medicago truncatula GN=MTR_4g069250 PE=3 SV=1	0	67.987	41	9	23	9	1	252	27.1	5.5	101.2	9	Not Found	High	High	High	High	High	High	High		0		0
High	Master Protein	G7I4Z9	Transmembrane amino acid transporter family protein OS=Medicago truncatula GN=MTR_1g094620 PE=4 SV=2	0	67.986	14	9	21	9	1	548	59.1	6.24	86.03	9	Not Found	Not Found	Not Found	High	High	High	High	High	Phospho [S86; T98; S122; S123]	4	Phospho [S86; T98; S122; S123]	0
High	Master Protein	B7FN46	RAB GTPase-like protein A1D OS=Medicago truncatula GN=MTR_4g012940 PE=2 SV=1	0	67.943	43	12	37	4	1	207	23.3	5.74	113.85	12	High	High	Not Found	Not Found	High	Not Found	High	High		0		0
High	Master Protein	G7JVC5	NADH-cytochrome b5 reductase OS=Medicago truncatula GN=MTR_4g114030 PE=3 SV=1	0	67.734	39	11	28	11	1	325	35.9	8.68	110.97	11	Not Found	High	Medium	High	High	High	High	High		0		0
High	Master Protein	A0A072VB05	MORN domain protein OS=Medicago truncatula GN=MTR_2g084835 PE=4 SV=1	0	67.617	18	13	27	13	1	843	97.2	4.98	100.21	13	High	High	High	High	High	High	High	High		0		0
High	Master Protein	G7LB96	ABC transporter-like protein OS=Medicago truncatula GN=MTR_8g091710 PE=4 SV=1	0	67.581	15	14	29	3	1	735	83	8.92	110.96	14	Not Found	Not Found	Not Found	Not Found	High	High	High	High		0		0
High	Master Protein	G7JC94	60S acidic ribosomal protein P0 OS=Medicago truncatula GN=MTR_3g108280 PE=3 SV=1	0	67.502	30	10	23	10	1	323	34.4	5.34	106.06	10	High	High	Not Found	High	High	High	High	High		0		0
High	Master Protein	A0A072UPB6	Ubiquinol oxidase OS=Medicago truncatula GN=MTR_4g094222 PE=3 SV=1	0	67.37	23	10	35	9	1	345	39.3	9.2	126.19	10	High	High	High	High	High	High	High	High	Deamidated [R103]	0		0
High	Master Protein	A0A072V9E9	Cytochrome P450 family 72 protein OS=Medicago truncatula GN=MTR_2g055430 PE=3 SV=1	0	67.327	29	16	33	1	1	520	59.8	8.82	104.15	16	Not Found	Not Found	Not Found	Not Found	Not Found	Not Found	Not Found	Medium		0		0
High	Master Protein	G7KGF6	Zincin-like metalloprotease family protein OS=Medicago truncatula GN=MTR_5g030940 PE=3 SV=2	0	67.29	20	15	22	14	1	786	88.7	6.28	78.33	15	Not Found	High	High	High	High	High	High	High		0		0
High	Master Protein	A0A072V208	Pleckstrin-like (PH) and lipid-binding START domain protein OS=Medicago truncatula GN=MTR_4g116840 PE=4 SV=1	0	67.276	21	16	25	16	1	737	82.7	8.19	84.15	16	Not Found	High	High	High	High	High	High	High		0		0
High	Master Protein	G7LA77	Chitinase (Class Ib) / Hevein OS=Medicago truncatula GN=MTR_8g074350 PE=3 SV=1	0	67.186	22	5	15	5	1	320	34.9	8.15	75.59	5	Not Found	Not Found	High	High	High	High	High	High	Deamidated [R131]	0		0
High	Master Protein	G7JTZ0	Glyoxysomal malate dehydrogenase OS=Medicago truncatula GN=MTR_4g092690 PE=3 SV=1	0	67.113	27	10	25	10	1	356	37.3	7.43	98.08	10	High	High	High	High	High	High	High	High	Deamidated [Q251]	0		0
High	Master Protein	A0A072V5C1	Glyoxysomal fatty acid beta-oxidation MFP-A protein OS=Medicago truncatula GN=MTR_2g436300 PE=4 SV=1	0	67.103	24	13	17	11	1	721	78.5	9.01	71.92	13	High	High	High	High	High	High	High	High		0		0
High	Master Protein	A0A072V1D5	Patellin-3 protein OS=Medicago truncatula GN=MTR_3g097350 PE=4 SV=1	0	67.021	27	12	24	9	1	573	64	4.83	85.91	12	High	Not Found	High	High	High	High	High	High		0		0
High	Master Protein	A0A072VCX2	Aspartate aminotransferase OS=Medicago truncatula GN=MTR_3g110065 PE=4 SV=1	0	66.903	32	11	14	11	1	458	50.2	8.44	56.88	11	Not Found	Not Found	High	High	High	High	High	High		0		0
High	Master Protein	G7JA88	ABC transporter-like protein OS=Medicago truncatula GN=MTR_3g094740 PE=4 SV=2	0	66.883	20	17	32	6	1	744	83.7	8.85	112.96	17	Not Found	Not Found	High	Not Found	Not Found	High	High	High		0		0
High	Master Protein	G7J5X1	Methyltransferase OS=Medicago truncatula GN=MTR_3g114780 PE=3 SV=1	0	66.787	27	11	22	11	1	360	40	6.39	83.81	11	Not Found	High	High	High	High	High	High	High		0		0
High	Master Protein	G7JVE7	NADPH--cytochrome P450 reductase OS=Medicago truncatula GN=MTR_4g128020 PE=3 SV=1	0	66.704	19	9	21	7	1	701	77.9	5.41	86.44	9	Not Found	Not Found	High	High	High	High	High	High	Deamidated [Q287]	0		0
High	Master Protein	G7KRJ7	DUF2358 family protein OS=Medicago truncatula GN=MTR_7g080220 PE=4 SV=1	0	66.645	30	8	27	8	1	308	33.9	6.93	93.27	8	Not Found	High	High	High	High	High	High	High		0		0
High	Master Protein	G7IUC4	ADP/ATP carrier protein OS=Medicago truncatula GN=MTR_2g098070 PE=3 SV=1	0	66.638	35	16	54	6	1	362	39.3	9.83	151.75	16	Not Found	Not Found	Not Found	High	High	High	High	High	Deamidated [Q209]	0		0
High	Master Protein	G7JCK0	Ketol-acid reductoisomerase OS=Medicago truncatula GN=MTR_4g079780 PE=3 SV=1	0	66.595	19	11	18	11	1	580	62.9	6.76	76.43	11	Not Found	Not Found	High	High	High	Not Found	High	High		0		0
High	Master Protein	G7J7R2	Dehydrin OS=Medicago truncatula GN=MTR_3g117290 PE=2 SV=1	0	66.587	46	9	15	9	1	209	23.5	5.8	69.88	9	High	High	High	High	Not Found	Not Found	High	High		0		0
High	Master Protein	G7KSR8	DnaJ heat shock family protein OS=Medicago truncatula GN=MTR_7g109340 PE=2 SV=1	0	66.557	34	11	25	11	1	344	38.7	6.8	91.73	11	High	High	High	High	High	Not Found	High	High		0		0
High	Master Protein	A0A072VAU0	Rhamnose biosynthetic-like enzyme OS=Medicago truncatula GN=MTR_2g073240 PE=4 SV=1	0	66.511	19	12	21	6	1	682	76.7	6.77	68.42	12	Not Found	Not Found	Not Found	High	High	High	High	Medium		0		0
High	Master Protein	A0A072URQ8	ABC transporter B family protein OS=Medicago truncatula GN=MTR_4g109720 PE=4 SV=1	0	66.46	23	13	18	13	1	633	68.4	8.16	64.38	13	High	Not Found	High	High	High	High	High	High		0		0
High	Master Protein	G7JLW6	Defective in exine formation protein OS=Medicago truncatula GN=MTR_4g014960 PE=4 SV=2	0	66.443	15	9	15	9	1	873	97.2	4.88	71.24	9	Not Found	High	Not Found	High	Not Found	High	High	High		0		0
High	Master Protein	A8W459	VAMP-associated protein OS=Medicago truncatula GN=MTR_4g027050 PE=2 SV=1	0	66.154	34	10	40	9	1	240	26.7	8.7	141.47	10	High	High	High	High	High	High	High	High	Deamidated [Q159]	0		0
High	Master Protein	G7J960	3-ketoacyl-CoA synthase OS=Medicago truncatula GN=MTR_3g105550 PE=3 SV=1	0	66.059	25	15	21	13	1	537	60.6	8.72	70.53	15	High	Not Found	High	High	High	High	High	High		0		0
High	Master Protein	Q38JD9	Temperature-induced lipocalin OS=Medicago truncatula GN=TIL' PE=2 SV=1	0	66.054	52	9	31	8	1	168	19.2	5.63	121.44	9	High	High	High	High	High	High	High	High		0		0
High	Master Protein	G7K6M0	MAP3K-like kinase OS=Medicago truncatula GN=MTR_5g017090 PE=4 SV=1	0	65.879	27	11	33	10	1	407	44.3	7.97	96.71	11	Not Found	Medium	High	High	High	High	High	High		0		0
High	Master Protein	G7IRR6	Protein disulfide-isomerase OS=Medicago truncatula GN=MTR_2g094180 PE=3 SV=1	0	65.845	26	15	22	14	1	564	63	4.83	75.17	15	High	High	High	High	High	High	High	High		0		0
High	Master Protein	G7L9X9	26S proteasome regulatory complex protein OS=Medicago truncatula GN=MTR_8g023550 PE=3 SV=1	0	65.821	38	18	36	18	1	411	46.2	5.97	95.19	18	High	High	High	High	High	High	High	High		0		0
High	Master Protein	G7KSD6	Dehydrogenase/reductase SDR family protein OS=Medicago truncatula GN=MTR_7g080410 PE=4 SV=1	0	65.8	34	10	22	10	1	318	35	9.03	85.84	10	Not Found	Not Found	High	High	High	High	High	High		0		0
High	Master Protein	G7KU89	LRR receptor-like kinase OS=Medicago truncatula GN=MTR_7g081720 PE=4 SV=1	0	65.752	13	10	16	10	1	1078	119.8	7.85	62.07	10	Not Found	Not Found	Not Found	High	High	High	High	High		0		0
High	Master Protein	G8A0X6	Cysteine-rich receptor-kinase-like protein OS=Medicago truncatula GN=MTR_1g105650 PE=4 SV=1	0	65.748	20	14	28	12	1	661	73.1	6.68	88.32	14	Not Found	High	High	High	High	High	High	High		0		0
High	Master Protein	G7I373	Dolichyl-diphosphooligosaccharide--protein glycosyltransferase subunit 1 OS=Medicago truncatula GN=MTR_1g094870 PE=3 SV=2	0	65.631	36	16	38	15	1	469	53.1	7.52	118.84	16	Not Found	High	High	High	High	High	High	High		0		0
High	Master Protein	G7J629	Lipoxygenase OS=Medicago truncatula GN=MTR_3g079420 PE=3 SV=2	0	65.479	19	14	19	12	1	865	99.4	5.96	63.25	14	Not Found	High	High	High	High	Not Found	High	High		0		0
High	Master Protein	G7LGP4	Phosphotransferase OS=Medicago truncatula GN=MTR_8g014530 PE=3 SV=1	0	65.223	20	9	21	7	1	494	53.5	5.99	92.49	9	Not Found	High	High	High	High	High	High	High		0		0
High	Master Protein	G7LGG4	Ferrochelatase OS=Medicago truncatula GN=MTR_8g095320 PE=3 SV=1	0	65.21	17	8	28	7	1	527	58.8	5.35	100.86	8	High	High	High	High	High	High	High	Medium		0		0
High	Master Protein	B7FLD9	2,3-bisphosphoglycerate-independent phosphoglycerate mutase OS=Medicago truncatula GN=MTR_7g074570 PE=2 SV=1	0	65.183	27	11	17	11	1	556	60.6	5.68	61.87	11	Not Found	High	High	High	High	High	High	High		0		0
High	Master Protein	G7J9V8	Chaperone ClpB, putative OS=Medicago truncatula GN=MTR_3g106160 PE=3 SV=1	0	65.112	15	12	17	8	1	980	109.8	6.98	62.26	12	Not Found	Medium	High	High	High	High	High	High		0		0
High	Master Protein	G7LD03	FMP32-like protein OS=Medicago truncatula GN=MTR_8g076260 PE=4 SV=1	0	65.097	39	9	21	7	1	241	27	8.43	83.87	9	Not Found	High	High	High	Not Found	Not Found	High	High		0		0
High	Master Protein	A0A072TZU1	Uncharacterized protein OS=Medicago truncatula GN=MTR_7g445370 PE=4 SV=1	0	65.07	39	11	25	11	1	276	30.9	9.31	91.62	11	High	Not Found	High	High	High	High	High	Not Found		0		0
High	Master Protein	A0A072VAY8	NADPH-protochlorophyllide oxidoreductase OS=Medicago truncatula GN=MTR_2g079710 PE=4 SV=1	0	64.945	27	11	25	11	1	399	43	9.07	90.4	11	Not Found	High	High	High	High	High	High	High		0		0
High	Master Protein	A0A072TRU7	Kinesin-like protein for actin based movement protein OS=Medicago truncatula GN=MTR_8g471180 PE=3 SV=1	0	64.816	11	11	18	11	1	1297	143.3	6.38	69.2	11	High	High	High	High	High	High	Medium	High		0		0
High	Master Protein	A0A072VMH0	2-methyl-6-phytylbenzoquinone methyltransferase OS=Medicago truncatula GN=MTR_1g076570 PE=3 SV=1	0	64.671	21	7	30	4	1	340	38.6	9.45	116.26	7	High	High	High	High	High	High	High	High	Deamidated [Q145]; Phospho [T141]	0		0
High	Master Protein	A0A072UYZ3	AAA family ATPase OS=Medicago truncatula GN=MTR_4g088885 PE=4 SV=1	0	64.565	20	11	15	11	1	752	82.7	6.13	64.37	11	Not Found	High	High	High	High	High	High	High		0		0
High	Master Protein	G7ICQ0	2-methyl-6-phytylbenzoquinone methyltransferase OS=Medicago truncatula GN=MTR_1g071110 PE=3 SV=1	0	64.565	23	10	34	7	1	347	39.1	9.06	124.72	10	High	High	High	High	High	High	High	High	Deamidated [Q152]; Phospho [T148]	1	Phospho [T148]	0
High	Master Protein	A0A072UFI4	TPR domain protein OS=Medicago truncatula GN=MTR_4g005300 PE=4 SV=1	0	64.468	27	12	21	12	1	388	42.2	6.24	82.9	12	High	High	High	High	High	High	High	High		0		0
High	Master Protein	G7KAG6	Cytochrome C oxidase, subunit VIb family protein OS=Medicago truncatula GN=MTR_5g064600 PE=2 SV=1	0	64.401	44	10	37	9	1	183	20.6	4.46	123.04	10	High	High	High	High	High	High	High	High	Deamidated [R120; Q126; R128]; Phospho [T114]	1	Phospho [T114]	0
High	Master Protein	S4SZ13	Ribosomal protein L16 OS=Medicago truncatula GN=rpl16 PE=3 SV=1	0	64.333	60	9	33	9	1	135	15.3	11.55	112.22	9	Not Found	High	High	High	High	High	High	High		0		0
High	Master Protein	A0A072U566	Peptidyl-prolyl cis-trans isomerase OS=Medicago truncatula GN=MTR_6g007607 PE=4 SV=1	0	64.277	25	9	20	9	1	455	50	5.31	85.58	9	Not Found	Not Found	High	High	High	High	High	Not Found		0		0
High	Master Protein	G7KC55	Transmembrane protein, putative OS=Medicago truncatula GN=MTR_5g019500 PE=4 SV=2	0	64.094	14	11	17	11	1	939	107.5	6.81	64.24	11	Not Found	High	High	High	High	High	High	High		0		0
High	Master Protein	G7LGE3	Transducin/WD40 repeat protein OS=Medicago truncatula GN=MTR_8g079820 PE=4 SV=2	0	64.032	11	13	17	13	1	1616	175.8	8.27	69.05	13	Not Found	High	High	High	High	High	High	High		0		0
High	Master Protein	G8A0W8	Cysteine-rich receptor-kinase-like protein OS=Medicago truncatula GN=MTR_1g105700 PE=4 SV=1	0	63.912	16	10	21	8	1	693	77.5	5.88	72.82	10	High	High	High	High	High	High	High	High	Deamidated [Q399]; Phospho [S658]	1	Phospho [S658]	0
High	Master Protein	G7J9B8	Glutamine synthetase OS=Medicago truncatula GN=MTR_3g065250 PE=3 SV=1	0	63.73	35	10	16	9	1	356	39.1	5.59	66.98	10	Not Found	High	Not Found	High	High	High	High	High		0		0
High	Master Protein	G7IT31	ABC transporter D family protein OS=Medicago truncatula GN=MTR_2g062790 PE=4 SV=2	0	63.453	26	14	24	14	1	744	83.7	5.77	71.66	14	Not Found	High	High	High	High	High	High	High		0		0
High	Master Protein	G7J7V5	Cysteine-rich RLK (Receptor-like kinase) protein OS=Medicago truncatula GN=MTR_3g064090 PE=4 SV=1	0	63.31	24	11	25	9	1	646	70.7	8.09	103	11	High	High	High	High	High	High	High	High		0		0
High	Master Protein	I3SSC7	Outer envelope pore protein OS=Medicago truncatula GN=MTR_2g096920 PE=2 SV=1	0	63.299	49	7	28	7	1	146	15.5	8.68	112.81	7	High	High	High	High	High	High	High	High		0		0
High	Master Protein	B7FJY9	Chlorophyll a-b binding protein, chloroplastic OS=Medicago truncatula GN=MTR_3g435460 PE=2 SV=1	0	63.295	38	8	31	8	1	253	27.7	6.93	125.29	8	Not Found	High	High	High	High	High	High	High	Deamidated [R100]	0		0
High	Master Protein	A0A072TZB9	40S ribosomal protein S6 OS=Medicago truncatula GN=MTR_7g053160 PE=3 SV=1	0	63.28	33	13	44	3	1	248	28.2	10.7	136.52	13	High	High	High	High	Not Found	Not Found	Not Found	Not Found		0		0
High	Master Protein	G7L1T5	O-linked GlcNAc transferase-like protein OS=Medicago truncatula GN=MTR_7g114810 PE=4 SV=1	0	63.235	30	9	15	9	1	302	33.8	8.34	66.45	9	Not Found	High	High	Not Found	High	High	High	High		0		0
High	Master Protein	G7IKL0	Peroxisome biogenesis-like protein OS=Medicago truncatula GN=MTR_2g088850 PE=2 SV=1	0	63.152	47	8	12	8	1	275	30.2	6.57	59.98	8	Not Found	Not Found	Not Found	High	High	High	High	High		0		0
High	Master Protein	G7JXA7	Alpha-glucosidase OS=Medicago truncatula GN=MTR_5g057990 PE=3 SV=1	0	63.095	17	12	19	12	1	926	102.9	6.77	61.69	12	Not Found	Not Found	High	High	High	Not Found	High	High		0		0
High	Master Protein	A0A072TS46	Zinc-binding dehydrogenase family oxidoreductase OS=Medicago truncatula GN=MTR_8g064610 PE=4 SV=1	0	63.069	35	10	16	10	1	384	40.9	7.88	66.98	10	High	High	Not Found	High	High	High	High	High		0		0
High	Master Protein	G7IHN1	Histone H2A OS=Medicago truncatula GN=MTR_2g096570 PE=2 SV=1	0	62.91	42	7	40	3	1	153	16.3	10.86	172.83	7	Not Found	Not Found	High	High	High	High	High	High		0		0
High	Master Protein	A0A072UB64	Chaperone dnaJ-like protein OS=Medicago truncatula GN=MTR_7g066250 PE=4 SV=1	0	62.715	21	12	30	12	1	423	46.4	6.99	103.66	12	High	High	High	High	High	High	High	High		0		0
High	Master Protein	A0A072VSY6	Pollen protein Ole E I-like protein OS=Medicago truncatula GN=MTR_1g116947 PE=4 SV=1	0	62.682	32	11	27	6	1	1074	119.6	9.51	83.57	11	High	High	High	High	High	Not Found	High	High		0		0
High	Master Protein	A0A072V290	Amine oxidase OS=Medicago truncatula GN=MTR_4g117610 PE=3 SV=1	0	62.663	19	9	16	8	1	668	75.8	6.57	68.49	9	Not Found	Not Found	High	High	High	High	High	High		0		0
High	Master Protein	A0A072VGH7	TCP-1/cpn60 chaperonin family protein OS=Medicago truncatula GN=MTR_1g030650 PE=3 SV=1	0	62.531	24	9	17	4	1	543	58.5	5.41	68.07	9	Not Found	Not Found	High	High	High	Not Found	High	High		0		0
High	Master Protein	B7FJJ4	Pyruvate dehydrogenase E1 beta subunit OS=Medicago truncatula GN=MTR_7g005380 PE=2 SV=1	0	62.531	29	10	25	10	1	361	38.9	6.11	99.83	10	Not Found	Not Found	High	High	High	High	High	High		0		0
High	Master Protein	A0A072TTN3	RAB GTPase-like protein A1D OS=Medicago truncatula GN=MTR_8g089985 PE=4 SV=1	0	62.472	46	12	29	7	1	225	24.9	5.99	92.05	12	High	High	High	High	High	High	Not Found	High	Deamidated [Q193]	0		0
High	Master Protein	A2Q5X8	LRR receptor-like kinase OS=Medicago truncatula GN=MTR_7g080810 PE=4 SV=1	0	62.389	20	9	19	7	1	615	67.4	7.43	75.03	9	Not Found	High	High	High	High	High	High	High		0		0
High	Master Protein	A0A072V606	LRR receptor-like kinase family protein OS=Medicago truncatula GN=MTR_2g030380 PE=4 SV=1	0	62.374	12	13	28	12	1	1066	115.7	6.43	84.93	13	Not Found	Not Found	Not Found	High	High	High	High	High		0		0
High	Master Protein	G7JNV8	Peroxisomal membrane PEX14-like protein, putative OS=Medicago truncatula GN=MTR_4g106880 PE=4 SV=2	0	62.35	21	10	24	10	1	523	57	5.53	96.38	10	High	High	High	High	High	High	High	High	Phospho [S309; S311]	2	Phospho [S309; S311]	0
High	Master Protein	A0A072UJ57	Pyridine nucleotide-disulfide oxidoreductase family protein OS=Medicago truncatula GN=MTR_4g051645 PE=4 SV=1	0	62.316	36	10	18	10	1	363	40.3	9.04	70.37	10	Not Found	High	High	High	Not Found	High	High	High		0		0
High	Master Protein	G7KQL9	ABC-type cobalt transport system, ATPase component OS=Medicago truncatula GN=MTR_7g079540 PE=4 SV=1	0	62.24	32	10	22	10	1	346	38.1	8.22	80.97	10	Not Found	High	High	High	High	High	High	High	Deamidated [Q62]	0		0
High	Master Protein	Q9T0M6	Sucrose synthase OS=Medicago truncatula GN=sucS1 PE=2 SV=1	0	62.112	20	12	24	8	1	805	92.2	6.25	91.73	12	Not Found	Not Found	Not Found	High	High	High	High	High	Deamidated [Q403]	0		0
High	Master Protein	A0A072TX81	6-phosphogluconate dehydrogenase, decarboxylating OS=Medicago truncatula GN=MTR_7g017900 PE=3 SV=1	0	62.107	31	12	21	11	1	486	53.7	5.78	65.03	12	Not Found	Not Found	High	High	High	High	High	High	Carboxymethyl [C174]	0		0
High	Master Protein	G7IW75	50S ribosomal protein L27 OS=Medicago truncatula GN=MTR_3g020680 PE=3 SV=1	0	62.075	30	9	29	9	1	193	21.3	10.4	111.62	9	High	High	High	High	High	High	High	High		0		0
High	Master Protein	A0A072UA79	Unusual kinase, putative OS=Medicago truncatula GN=MTR_6g038750 PE=4 SV=1	0	61.983	16	10	16	10	1	710	79.3	7.27	62.75	10	Not Found	High	High	High	High	High	High	High		0		0
High	Master Protein	A0A072UQS7	Transporter family ABC domain protein OS=Medicago truncatula GN=MTR_5g075955 PE=4 SV=1	0	61.907	17	8	21	2	1	604	66.5	8.82	84.37	8	Not Found	Not Found	Not Found	High	Not Found	Not Found	Not Found	Not Found		0		0
High	Master Protein	G7JLT3	Uncharacterized protein OS=Medicago truncatula GN=MTR_4g014600 PE=4 SV=1	0	61.717	24	10	28	10	1	512	60	8.69	116.4	10	High	Not Found	High	High	High	High	High	High	Carboxymethyl [C78]	0		0
High	Master Protein	G7JUY1	ATP synthase subunit alpha OS=Medicago truncatula GN=MTR_4g079170 PE=4 SV=1	0	61.706	48	6	44	2	1	147	15.9	4.94	180.94	6	Not Found	Not Found	Not Found	High	High	High	High	High	Deamidated [Q97]	0		0
High	Master Protein	A0A072UVI7	Reticulon-like protein OS=Medicago truncatula GN=MTR_3g449880 PE=4 SV=1	0	61.665	39	11	27	9	1	241	27.1	8.25	107.02	11	Not Found	Not Found	High	High	High	High	High	High		0		0
High	Master Protein	G7IV17	Cellulose synthase E1-like protein OS=Medicago truncatula GN=MTR_3g060280 PE=3 SV=1	0	61.637	15	12	19	1	1	747	85.7	7.2	84.12	12	High	Not Found	Not Found	Not Found	Not Found	Not Found	Not Found	Not Found		0		0
High	Master Protein	G7I5W7	Protein accumulation AND replication OFs protein OS=Medicago truncatula GN=MTR_1g023310 PE=4 SV=1	0	61.545	15	8	12	8	1	796	87.2	5	63.14	8	Not Found	Not Found	Not Found	High	High	High	High	High		0		0
High	Master Protein	G7IHV7	Electron transfer flavoprotein-ubiquinone oxidoreductase, mitochondrial OS=Medicago truncatula GN=MTR_2g099040 PE=3 SV=2	0	61.53	23	11	21	6	1	542	60.3	7.99	77.75	11	Not Found	Not Found	High	Not Found	High	High	High	High		0		0
High	Master Protein	A0A072VP26	Aspartate aminotransferase OS=Medicago truncatula GN=MTR_1g013050 PE=4 SV=1	0	61.495	30	13	22	13	1	465	50.9	8.16	75.94	13	Not Found	Not Found	Not Found	High	High	High	High	High		0		0
High	Master Protein	Q5ENY3	Calcium-binding EF-hand; Ferric reductase-like transmembrane component (Fragment) OS=Medicago truncatula GN=MTR_7g113130 PE=2 SV=1	0	61.448	14	11	19	8	1	895	101.7	9.35	77.59	11	Not Found	High	High	High	High	High	High	Not Found		0		0
High	Master Protein	A0A072VBZ7	Two pore calcium channel protein, putative OS=Medicago truncatula GN=MTR_2g090380 PE=4 SV=1	0	61.388	10	9	26	9	1	737	84.8	5.06	108.3	9	Not Found	High	High	High	High	High	High	High		0		0
High	Master Protein	A0A072UKB3	Fission ELM1 protein OS=Medicago truncatula GN=MTR_4g052540 PE=4 SV=1	0	61.376	32	11	12	11	1	425	47.1	9.2	48.58	11	Not Found	High	Not Found	High	Not Found	High	High	High		0		0
High	Master Protein	G7JHV6	Pyruvate orthophosphate dikinase OS=Medicago truncatula GN=MTR_4g118350 PE=4 SV=2	0	61.226	25	11	14	11	1	624	68.3	7.83	53.19	11	Not Found	High	High	High	High	High	High	High		0		0
High	Master Protein	G7IAZ2	2-isopropylmalate synthase OS=Medicago truncatula GN=MTR_1g116500 PE=3 SV=1	0	61.121	22	9	21	9	1	598	65	6.4	96.99	9	Not Found	Not Found	High	High	High	High	High	High		0		0
High	Master Protein	G7JAR7	Serine hydroxymethyltransferase OS=Medicago truncatula GN=MTR_3g084310 PE=3 SV=1	0	60.968	25	9	19	4	1	471	51.6	7.27	82.83	9	Not Found	Not Found	Not Found	Not Found	High	High	High	Not Found		0		0
High	Master Protein	A0A072V5S0	Late embryogenesis abundant protein OS=Medicago truncatula GN=MTR_3g045190 PE=4 SV=1	0	60.945	37	9	18	9	1	310	33.9	4.94	66.37	9	Not Found	Not Found	High	High	High	High	High	High		0		0
High	Master Protein	G7IY76	Enhancer of mRNA-decapping-like protein OS=Medicago truncatula GN=MTR_3g061160 PE=4 SV=1	0	60.929	13	14	19	13	1	1383	150.7	6.19	63.51	14	Not Found	High	High	High	High	High	High	Not Found		0		0
High	Master Protein	G7L9W1	Exocyst complex component Sec10 OS=Medicago truncatula GN=MTR_8g023330 PE=4 SV=2	0	60.916	17	9	13	9	1	821	90.1	5.47	54.79	9	Not Found	High	High	High	High	Not Found	Not Found	Not Found		0		0
High	Master Protein	A0A072UR75	Methyltransferase PMT14-like protein, putative OS=Medicago truncatula GN=MTR_4g098890 PE=4 SV=1	0	60.847	10	15	32	12	1	1599	180.9	8.18	113.44	15	High	High	High	High	High	High	High	High	Deamidated [Q1074]	0		0
High	Master Protein	G7II85	Molecular chaperone Hsp40/DnaJ family protein OS=Medicago truncatula GN=MTR_2g104030 PE=3 SV=1	0	60.804	19	8	17	8	1	496	53.4	8.48	70.51	8	Not Found	Not Found	High	High	High	High	High	High		0		0
High	Master Protein	G7IAX8	Plastid lipid-associated protein OS=Medicago truncatula GN=MTR_1g116320 PE=4 SV=1	0	60.676	31	12	26	12	1	388	42.8	7.84	105.08	12	Not Found	Not Found	High	High	High	High	High	High		0		0
High	Master Protein	A0A072W2L0	E1 subunit-like 2-oxoglutarate dehydrogenase OS=Medicago truncatula GN=MTR_1g115340 PE=4 SV=1	0	60.541	11	14	27	1	1	1023	116.1	7.4	86.55	14	Not Found	Not Found	Medium	Not Found	Not Found	Medium	Medium	Medium		0		0
High	Master Protein	B7FH28	60S ribosomal L6-like protein OS=Medicago truncatula GN=MTR_3g094860 PE=2 SV=1	0	60.492	42	11	33	2	1	233	25.9	10.2	126.72	11	Not Found	High	High	High	High	High	High	High		0		0
High	Master Protein	G7IR51	Plant/MXC17-8 protein OS=Medicago truncatula GN=MTR_2g081000 PE=4 SV=1	0	60.46	23	12	20	12	1	526	57.5	9.1	71.39	12	High	High	High	High	High	High	High	High		0		0
High	Master Protein	G7J833	Transmembrane 9 superfamily member OS=Medicago truncatula GN=MTR_3g082140 PE=3 SV=2	0	60.443	11	7	14	7	1	659	74.8	6.47	58.25	7	Not Found	High	High	High	High	High	High	High		0		0
High	Master Protein	G7J2L0	60 kDa inner membrane protein OS=Medicago truncatula GN=MTR_3g086250 PE=3 SV=1	0	60.438	22	9	22	9	1	532	58.5	8.27	70.18	9	High	High	High	Medium	High	High	High	High	Deamidated [Q436; Q443]	0		0
High	Master Protein	G7JT48	Phosphoribulokinase/uridine kinase-like protein OS=Medicago truncatula GN=MTR_4g112790 PE=4 SV=2	0	60.37	27	15	20	13	1	665	74.4	6.98	64.17	15	Not Found	Not Found	High	High	High	High	High	High		0		0
High	Master Protein	G7JLS7	Ferritin OS=Medicago truncatula GN=MTR_4g014540 PE=3 SV=1	0	60.092	29	7	22	6	1	250	28.1	6.04	95.35	7	Not Found	Not Found	Not Found	High	High	High	High	High		0		0
High	Master Protein	A0A072TU77	Peptidase M1 family aminopeptidase N OS=Medicago truncatula GN=MTR_8g098525 PE=4 SV=1	0	60.077	12	9	16	9	1	975	109.6	6.61	65.62	9	Not Found	High	High	High	High	High	High	High		0		0
High	Master Protein	B7FGT0	40S ribosomal S7-like protein OS=Medicago truncatula GN=MTR_6g085000 PE=2 SV=1	0	59.983	55	13	35	13	1	191	21.9	9.89	102.14	13	High	Not Found	High	High	High	High	High	High		0		0
High	Master Protein	A0A072VR75	Cobalamin biosynthesis protein OS=Medicago truncatula GN=MTR_1g115505 PE=4 SV=1	0	59.971	18	6	12	6	1	449	49.9	6.27	52.23	6	Not Found	Not Found	High	High	High	High	High	High		0		0
High	Master Protein	A0A072UCM8	Phosphotransferase OS=Medicago truncatula GN=MTR_6g088795 PE=3 SV=1	0	59.94	31	12	22	9	1	496	53.7	6	77.17	12	Not Found	Not Found	Not Found	Not Found	High	High	High	High		0		0
High	Master Protein	A0A072VRA4	50S ribosomal protein L15 OS=Medicago truncatula GN=MTR_1g110750 PE=3 SV=1	0	59.826	40	10	26	10	1	257	27.7	10.36	119.2	10	Medium	High	High	High	High	High	High	High		0		0
High	Master Protein	G7IJD1	LRR receptor-like kinase OS=Medicago truncatula GN=MTR_2g074840 PE=4 SV=2	0	59.753	13	16	36	7	1	1001	110.7	6.64	97.73	16	High	Not Found	Not Found	High	Not Found	High	High	High		0		0
High	Master Protein	A0A072TI08	Rhamnose biosynthetic-like enzyme OS=Medicago truncatula GN=MTR_0034s0060 PE=4 SV=1	0	59.718	16	12	20	6	1	798	89.9	7.8	65.66	12	Not Found	High	Not Found	High	High	High	High	Not Found		0		0
High	Master Protein	G7KG90	Stress-inducible protein, putative OS=Medicago truncatula GN=MTR_5g012030 PE=4 SV=1	0	59.681	20	9	10	9	1	581	65.3	5.94	49.12	9	Not Found	High	High	High	High	High	Not Found	Not Found		0		0
High	Master Protein	A0A072UC92	White-brown-complex ABC transporter family protein, putative OS=Medicago truncatula GN=MTR_6g066240 PE=4 SV=1	0	59.668	14	13	21	13	1	697	77.8	8.4	79.13	13	Not Found	High	High	High	High	High	High	High	Deamidated [R116]; Phospho [S686]	1	Phospho [S686]	0
High	Master Protein	A0A072VAA5	Succinate-semialdehyde dehydrogenase OS=Medicago truncatula GN=MTR_2g067660 PE=3 SV=1	0	59.637	21	9	12	9	1	522	55.8	6.92	48.4	9	Not Found	Not Found	High	High	Not Found	Not Found	High	High		0		0
High	Master Protein	G7KSL5	Transmembrane protein 14C OS=Medicago truncatula GN=MTR_7g090890 PE=2 SV=1	0	59.612	22	7	13	7	1	231	24.9	9.13	61.4	7	High	High	High	High	High	High	Not Found	Not Found		0		0
High	Master Protein	G7I682	Uncharacterized protein OS=Medicago truncatula GN=MTR_1g079870 PE=4 SV=1	0	59.559	28	10	17	10	1	449	50.4	5.45	73.53	10	Not Found	High	High	High	High	High	High	High		0		0
High	Master Protein	G7KF41	Carnitine/acylcarnitine carrier-like protein OS=Medicago truncatula GN=MTR_5g030530 PE=3 SV=1	0	59.544	40	10	41	6	1	297	30.7	9.2	128.49	10	High	Not Found	High	High	High	High	High	High		0		0
High	Master Protein	A0A072TK26	RAB GTPase-like protein A5D OS=Medicago truncatula GN=MTR_8g006970 PE=4 SV=1	0	59.516	45	11	50	4	1	217	24	6.57	148.13	11	Medium	Not Found	Not Found	Not Found	High	High	High	High		0		0
High	Master Protein	G7IUM1	ATP-dependent zinc metalloprotease FTSH protein OS=Medicago truncatula GN=MTR_2g101290 PE=4 SV=1	0	59.503	18	13	16	13	1	881	100.1	9.26	63.67	13	Medium	High	Not Found	High	High	High	High	High		0		0
High	Master Protein	Q2HUK6	Mitochondrial substrate carrier OS=Medicago truncatula GN=MTR_7g083790 PE=3 SV=1	0	59.355	32	15	60	13	1	373	39.5	9.25	177.16	15	High	High	High	High	High	High	High	High		0		0
High	Master Protein	A0A072VC68	Fasciclin-like arabinogalactan protein OS=Medicago truncatula GN=MTR_2g090765 PE=4 SV=1	0	59.286	26	6	33	6	1	249	26.4	7.33	130.54	6	High	High	High	High	High	High	High	High		0		0
High	Master Protein	B7FIZ2	NADH-ubiquinone oxidoreductase 39 kDa subunit OS=Medicago truncatula GN=MTR_1g069455 PE=2 SV=1	0	59.258	27	12	26	12	1	396	43.8	9.33	85.97	12	Not Found	High	High	High	High	High	High	High		0		0
High	Master Protein	B7FMD4	40S ribosomal S9-like protein OS=Medicago truncatula GN=MTR_3g005430 PE=2 SV=1	0	59.115	40	12	41	12	1	197	22.9	10.24	141.62	12	High	High	High	High	High	High	High	High		0		0
High	Master Protein	G7JYH3	E3 ubiquitin-protein ligase UPL1-like protein OS=Medicago truncatula GN=MTR_5g066710 PE=4 SV=1	0	59.105	4	12	16	5	1	3655	401.9	5.21	54.2	12	High	Not Found	Not Found	High	High	High	Not Found	High		0		0
High	Master Protein	G7LD20	Aldehyde dehydrogenase OS=Medicago truncatula GN=MTR_8g076480 PE=3 SV=1	0	58.979	18	7	24	7	1	488	54.7	7.69	103.41	7	Not Found	Not Found	Not Found	High	High	High	High	High		0		0
High	Master Protein	G7J648	Cobalamin-independent methionine synthase OS=Medicago truncatula GN=MTR_3g079640 PE=3 SV=1	0	58.898	18	15	18	13	1	813	90.6	7.23	64.09	15	High	High	High	High	High	High	High	High		0		0
High	Master Protein	A0A072U5V1	Nucleoside diphosphate kinase OS=Medicago truncatula GN=MTR_8g099450 PE=3 SV=1	0	58.857	36	9	36	9	1	234	25.4	8.7	124.61	9	High	High	High	High	High	High	High	High		0		0
High	Master Protein	B7FKU7	Cysteine synthase OS=Medicago truncatula GN=MTR_5g006340 PE=2 SV=1	0	58.714	32	8	15	8	1	325	34.2	5.82	73.42	8	Not Found	Not Found	High	Not Found	Not Found	High	High	High		0		0
High	Master Protein	B7FIA7	Reticulon-like protein OS=Medicago truncatula GN=MTR_8g099060 PE=2 SV=1	0	58.695	26	11	48	9	1	260	29.3	9.03	146.23	11	High	High	High	High	High	High	High	High	Phospho [S47]	1	Phospho [S47]	0
High	Master Protein	A0A072TSZ4	Signal recognition particle subunit SRP72 OS=Medicago truncatula GN=MTR_8g079990 PE=3 SV=1	0	58.671	19	9	11	9	1	668	74	9.17	44.94	9	Not Found	High	Not Found	High	High	High	High	High	Carboxymethyl [C187]	0		0
High	Master Protein	G7KU87	RAB GTPase-like protein B1C OS=Medicago truncatula GN=MTR_7g081700 PE=4 SV=1	0	58.666	53	10	48	2	1	202	22.5	5.16	145.67	10	Not Found	Not Found	Not Found	Not Found	Not Found	High	High	High		0		0
High	Master Protein	G7JX25	Uncharacterized protein OS=Medicago truncatula GN=MTR_5g053260 PE=2 SV=1	0	58.637	27	15	19	15	1	545	61.6	5.4	72.23	15	Not Found	High	High	High	High	High	High	High		0		0
High	Master Protein	B7FJC3	60S ribosomal protein L18a OS=Medicago truncatula GN=MTR_2g098000 PE=2 SV=1	0	58.635	55	11	31	4	1	178	21.3	10.3	114.66	11	Not Found	Not Found	Not Found	High	High	High	High	High	Deamidated [R97]	0		0
High	Master Protein	A0A072UQQ9	Plasma membrane ATPase OS=Medicago truncatula GN=MTR_4g116950 PE=3 SV=1	0	58.511	14	13	61	1	1	948	104	6.2	179.5	13	Not Found	Not Found	Not Found	Not Found	Not Found	Medium	Not Found	Not Found		0		0
High	Master Protein	A0A072UXM4	Asparagine synthetase [glutamine-hydrolyzing] protein OS=Medicago truncatula GN=MTR_3g464580 PE=4 SV=1	0	58.511	16	10	23	5	1	586	66.4	6.47	78.59	10	Not Found	Not Found	High	High	High	High	High	Not Found		0		0
High	Master Protein	G7IIR7	DnaJ heat shock family protein OS=Medicago truncatula GN=MTR_2g044580 PE=4 SV=1	0	58.396	16	11	23	11	1	685	76.5	5.44	84.9	11	High	High	High	High	High	High	High	High		0		0
High	Master Protein	G7IMZ3	ABA-responsive protein OS=Medicago truncatula GN=MTR_2g035190 PE=3 SV=1	0	58.265	46	8	22	2	1	157	16.6	5.07	102.17	8	Not Found	High	Not Found	Not Found	Not Found	Not Found	Not Found	Not Found		0		0
High	Master Protein	G7L900	3-hydroxyisobutyryl-CoA hydrolase-like protein OS=Medicago truncatula GN=MTR_8g103840 PE=3 SV=1	0	58.059	31	10	14	10	1	377	41	5.91	52.45	10	High	High	Not Found	High	High	Not Found	Not Found	High		0		0
High	Master Protein	A0A072UFB5	Ras-related small GTP-binding family protein OS=Medicago truncatula GN=MTR_7g112090 PE=3 SV=1	0	58.027	45	10	21	6	1	193	22	7.05	103.62	10	Not Found	Not Found	Not Found	High	High	High	High	High		0		0
High	Master Protein	B7FHA8	Peptidyl-prolyl cis-trans isomerase OS=Medicago truncatula GN=MTR_1g094065 PE=2 SV=1	0	58.01	45	8	14	8	1	230	25.6	8.48	70.23	8	Not Found	Not Found	High	Not Found	High	High	High	High		0		0
High	Master Protein	G7K8K5	Calcium-dependent kinase OS=Medicago truncatula GN=MTR_5g092810 PE=4 SV=2	0	57.97	20	9	18	4	1	540	61.3	7.8	71.45	9	Not Found	High	High	High	Not Found	Not Found	Not Found	Not Found		0		0
High	Master Protein	B7FHF4	Ribosomal protein L19 OS=Medicago truncatula GN=MTR_1g087910 PE=2 SV=1	0	57.965	32	10	31	3	1	213	24.7	11.37	104.81	10	Not Found	Medium	Not Found	Not Found	High	High	High	High		0		0
High	Master Protein	G7LD98	Guanine nucleotide-binding protein beta subunit-like protein OS=Medicago truncatula GN=MTR_8g106790 PE=4 SV=1	0	57.853	32	8	15	8	1	325	35.7	7.44	48.87	8	High	Not Found	Not Found	High	High	High	High	High		0		0
High	Master Protein	A0A072UZY2	LRR receptor-like kinase family protein OS=Medicago truncatula GN=MTR_3g075440 PE=4 SV=1	0	57.844	12	6	10	5	1	628	69.9	9.13	61.09	6	Not Found	High	High	High	Not Found	Not Found	Not Found	High		0		0
High	Master Protein	G7IYL0	LRR receptor-like kinase OS=Medicago truncatula GN=MTR_3g009050 PE=4 SV=1	0	57.841	24	12	16	12	1	479	52.9	8.62	54.73	12	Not Found	Not Found	High	High	High	Not Found	High	High		0		0
High	Master Protein	G7KPN3	Glutamate dehydrogenase OS=Medicago truncatula GN=MTR_6g029460 PE=3 SV=1	0	57.739	31	10	16	3	1	411	44.5	6.8	54.89	10	Not Found	Not Found	High	High	High	High	High	High		0		0
High	Master Protein	A0A072TZD1	LRR receptor-like kinase OS=Medicago truncatula GN=MTR_8g031030 PE=4 SV=1	0	57.725	20	10	26	3	1	491	55.2	6.23	97.78	10	Not Found	High	Not Found	Not Found	High	Not Found	Not Found	Not Found		0		0
High	Master Protein	G7LFT6	Zn-dependent alcohol dehydrogenase family protein OS=Medicago truncatula GN=MTR_8g095220 PE=4 SV=1	0	57.687	21	10	23	10	1	425	45.6	7.91	87.14	10	Not Found	High	High	High	High	High	High	High		0		0
High	Master Protein	G7KT73	40S ribosomal protein S4 OS=Medicago truncatula GN=MTR_7g069950 PE=2 SV=1	0	57.643	43	16	69	2	1	265	30	10.4	190.05	16	High	High	Not Found	High	Not Found	Not Found	Not Found	Not Found	Deamidated [Q166]	0		0
High	Master Protein	I3SCJ8	RW1-like protein, putative OS=Medicago truncatula GN=MTR_8g080630 PE=2 SV=1	0	57.603	37	4	12	4	1	92	11.1	8.16	77.65	4	Not Found	Not Found	Not Found	High	High	High	High	High		0		0
High	Master Protein	G7KJE1	Cytochrome P450 family 82 protein OS=Medicago truncatula GN=MTR_6g008500 PE=3 SV=1	0	57.504	25	10	14	10	1	541	61.6	7.74	59.8	10	High	Not Found	High	High	Not Found	High	High	High		0		0
High	Master Protein	G7IS33	DEAD-box ATP-dependent RNA helicase OS=Medicago truncatula GN=MTR_2g099620 PE=3 SV=1	0	57.473	31	10	31	2	1	413	46.7	5.82	95.34	10	Not Found	Not Found	Not Found	Not Found	High	Not Found	Not Found	High		0		0
High	Master Protein	A0A072UHP4	Uncharacterized protein OS=Medicago truncatula GN=MTR_4g017880 PE=4 SV=1	0	57.458	32	8	21	8	1	194	20.8	4.82	79.3	8	Not Found	High	High	High	High	High	High	High		0		0
High	Master Protein	A0A072V758	Acyl-CoA dehydrogenase family protein OS=Medicago truncatula GN=MTR_2g435800 PE=4 SV=1	0	57.35	20	10	16	10	1	565	63.1	6.8	59.38	10	Not Found	High	High	High	High	High	High	High		0		0
High	Master Protein	G7I883	Plastocyanin-like domain protein OS=Medicago truncatula GN=MTR_1g014120 PE=4 SV=1	0	57.347	42	9	31	9	1	184	19.4	7.81	119.53	9	High	High	Medium	High	High	High	High	High		0		0
High	Master Protein	A0A072URR3	DEAD-box ATP-dependent RNA helicase OS=Medicago truncatula GN=MTR_4g125970 PE=3 SV=1	0	57.116	27	10	25	3	1	430	48.6	5.57	90.9	10	Not Found	Not Found	Not Found	High	Not Found	High	Not Found	High		0		0
High	Master Protein	G7JLV1	Elongation factor 1-alpha OS=Medicago truncatula GN=MTR_4g014810 PE=3 SV=1	0	57.076	29	14	37	5	1	447	49.4	9.07	118.86	14	Not Found	Not Found	Not Found	Not Found	High	High	Not Found	High		0		0
High	Master Protein	A0A072UKG0	Histone H2B OS=Medicago truncatula GN=MTR_4g064983 PE=3 SV=1	0	57.055	27	11	58	4	1	241	25.9	9.23	185.99	11	High	High	High	High	High	High	High	High		0		0
High	Master Protein	G7JW29	DnaJ heat shock amino-terminal domain protein OS=Medicago truncatula GN=MTR_5g012530 PE=4 SV=2	0	57.034	22	11	25	11	1	540	59.8	9.04	89.43	11	Not Found	Not Found	High	High	High	High	High	High		0		0
High	Master Protein	A0A072UIK1	DnaJ heat shock amino-terminal domain protein OS=Medicago truncatula GN=MTR_4g032805 PE=4 SV=1	0	56.954	29	9	21	9	1	269	30.7	7.52	85.89	9	Not Found	Not Found	High	High	High	High	High	High		0		0
High	Master Protein	B7FHV0	Phenylcoumaran benzylic ether reductase-like protein Fi1 OS=Medicago truncatula GN=MTR_5g020740 PE=2 SV=1	0	56.918	33	8	17	7	1	309	33.8	5.88	55.41	8	Not Found	Not Found	Not Found	High	High	High	High	High		0		0
High	Master Protein	G7LE71	Sel1 repeat protein OS=Medicago truncatula GN=MTR_8g107400 PE=4 SV=2	0	56.861	22	9	10	9	1	674	75.5	6.29	41	9	Not Found	Not Found	High	High	High	High	High	High		0		0
High	Master Protein	G7LD87	Plastid movement impaired protein OS=Medicago truncatula GN=MTR_8g106680 PE=4 SV=2	0	56.794	15	9	13	9	1	871	96.3	5.44	61.58	9	Not Found	Not Found	High	High	High	High	High	High		0		0
High	Master Protein	B7FGP5	Adenine nucleotide alpha hydrolase superfamily protein OS=Medicago truncatula GN=MTR_4g019800 PE=2 SV=1	0	56.753	41	8	24	7	1	165	18.4	6.05	85.87	8	Not Found	Not Found	Not Found	High	High	High	High	High		0		0
High	Master Protein	G7KSH3	Rhodanese/cell cycle control phosphatase superfamily protein, putative OS=Medicago truncatula GN=MTR_7g080890 PE=4 SV=1	0	56.749	30	8	15	8	1	355	39.7	8.88	61.84	8	Not Found	High	High	Not Found	High	High	High	High		0		0
High	Master Protein	G7IEJ2	Fumarate hydratase OS=Medicago truncatula GN=MTR_1g087900 PE=3 SV=1	0	56.732	26	12	24	12	1	491	53.3	8.53	88.02	12	Not Found	Not Found	High	High	High	High	High	High	Deamidated [Q58]	0		0
High	Master Protein	G7IV18	Cellulose synthase E1-like protein OS=Medicago truncatula GN=MTR_3g060280 PE=3 SV=2	0	56.651	18	12	20	1	1	591	68.2	8.22	80.3	12	Not Found	Not Found	Not Found	Not Found	Not Found	Medium	Medium	Not Found		0		0
High	Master Protein	A0A072VG18	SMP-30/gluconolaconase/LRE-like region protein OS=Medicago truncatula GN=MTR_1g030760 PE=4 SV=1	0	56.61	30	8	12	8	1	369	41	5.68	53.04	8	High	Not Found	High	High	Not Found	High	High	High		0		0
High	Master Protein	A0A072VKU9	Regulatory particle triple-A ATPase OS=Medicago truncatula GN=MTR_1g069105 PE=3 SV=1	0	56.606	34	15	31	2	1	446	49.7	6.33	94.24	15	Not Found	Not Found	Not Found	Not Found	Not Found	Not Found	High	High		0		0
High	Master Protein	A0A072UGN2	LRR receptor-like kinase OS=Medicago truncatula GN=MTR_5g083480 PE=4 SV=1	0	56.604	20	14	18	9	1	789	85.9	7.68	61.92	14	Medium	High	High	High	High	Medium	Not Found	High		0		0
High	Master Protein	G7IKW4	p-loop nucleoside triphosphate hydrolase superfamily protein OS=Medicago truncatula GN=MTR_2g030420 PE=3 SV=1	0	56.581	15	10	19	8	1	466	53.5	8.34	76.76	10	Not Found	Not Found	High	High	High	High	High	Not Found		0		0
High	Master Protein	Q2MJ20	Cytochrome P450 family protein OS=Medicago truncatula GN=CYP716A12 PE=2 SV=1	0	56.511	26	12	22	12	1	479	54.7	8.72	69.41	12	Not Found	Not Found	High	High	High	High	High	High		0		0
High	Master Protein	A0A072UU27	F0F1 ATP synthase subunit gamma OS=Medicago truncatula GN=MTR_4g129790 PE=3 SV=1	0	56.477	27	15	53	15	1	327	35.5	9.2	150.88	15	High	High	High	High	High	High	High	High		0		0
High	Master Protein	G7J6H9	Phosphatidylinositol 4-kinase alpha OS=Medicago truncatula GN=MTR_3g116250 PE=3 SV=2	0	56.269	8	12	15	12	1	2035	223.8	6.32	52.24	12	High	Not Found	Not Found	High	High	High	High	High		0		0
High	Master Protein	A0A072V2S7	Cation-transporting ATPase OS=Medicago truncatula GN=MTR_3g097560 PE=3 SV=1	0	56.21	12	14	26	14	1	1191	131.7	8.35	81	14	Not Found	High	High	High	High	High	High	High		0		0
High	Master Protein	G7IDM5	Sucrose-binding protein-like protein OS=Medicago truncatula GN=MTR_1g071710 PE=4 SV=1	0	56.16	24	11	27	11	1	494	56	6.4	94.24	11	Not Found	High	High	High	High	High	High	High		0		0
High	Master Protein	A0A072UTJ9	Beta-glucosidase OS=Medicago truncatula GN=MTR_4g122980 PE=3 SV=1	0	56.125	18	9	18	9	1	632	71.9	6.1	52.81	9	High	Not Found	High	High	High	High	High	High		0		0
High	Master Protein	G7J2S0	Substrate carrier family protein OS=Medicago truncatula GN=MTR_3g098460 PE=3 SV=1	0	55.921	26	11	22	8	1	483	54	6.01	72.99	11	Not Found	High	High	High	High	High	High	High	Deamidated [Q287]	0		0
High	Master Protein	G7LIT8	Signal recognition particle subunit SRP68 OS=Medicago truncatula GN=MTR_8g100110 PE=3 SV=1	0	55.862	21	12	19	12	1	603	68	8.68	61.74	12	Not Found	High	High	High	High	High	High	High		0		0
High	Master Protein	A0A072U1P3	Strictosidine synthase family protein OS=Medicago truncatula GN=MTR_7g490350 PE=4 SV=1	0	55.794	21	8	19	8	1	369	40.4	6.44	80.87	8	Not Found	High	High	High	High	High	High	High		0		0
High	Master Protein	G7I6H0	IQ calmodulin-binding motif protein OS=Medicago truncatula GN=MTR_1g023760 PE=4 SV=1	0	55.739	15	10	15	10	1	784	85.8	6.34	53.42	10	High	High	High	High	High	High	High	High	Deamidated [Q179]	0		0
High	Master Protein	G7JRA5	SOUL heme-binding family protein OS=Medicago truncatula GN=MTR_4g019150 PE=4 SV=1	0	55.65	42	8	19	7	1	202	22.5	5.85	72.19	8	High	High	High	High	High	High	High	High		0		0
High	Master Protein	Q2HTA3	AAA ATPase; 26S proteasome subunit P45 OS=Medicago truncatula GN=MTR_7g099640 PE=3 SV=1	0	55.649	36	14	30	1	1	445	49.5	6.21	92.81	14	Not Found	Not Found	Not Found	Not Found	Not Found	High	Not Found	Not Found		0		0
High	Master Protein	G7IRL5	Serine/threonine-protein kinase OS=Medicago truncatula GN=MTR_2g089360 PE=3 SV=1	0	55.581	13	9	15	8	1	829	92.3	6.74	55.03	9	Not Found	High	Not Found	High	High	Not Found	High	High	Deamidated [Q534; R536]	0		0
High	Master Protein	G7L779	NAD(P)-binding rossmann-fold protein OS=Medicago truncatula GN=MTR_8g087310 PE=4 SV=2	0	55.551	28	12	14	12	1	597	65.9	8.47	48.96	12	Not Found	Medium	High	High	High	High	High	High		0		0
High	Master Protein	G7LA76	Chitinase (Class Ib) / Hevein OS=Medicago truncatula GN=MTR_8g074330 PE=2 SV=2	0	55.489	20	5	15	5	1	320	34.3	6.62	71.84	5	Not Found	Not Found	High	High	High	High	High	High	Deamidated [R131]	0		0
High	Master Protein	A0A072U5F0	Translational activator GCN1-like protein OS=Medicago truncatula GN=MTR_7g116425 PE=4 SV=1	0	55.487	6	16	20	16	1	2632	287.5	7.09	55.79	16	High	High	High	High	High	High	High	High		0		0
High	Master Protein	G7IA05	Armadillo/beta-catenin-like repeat protein, putative OS=Medicago truncatula GN=MTR_1g031750 PE=4 SV=1	0	55.428	17	9	12	9	1	826	90.2	5.31	48.18	9	Not Found	Not Found	High	Not Found	High	Not Found	High	High		0		0
High	Master Protein	G7JVL9	NAD(P)H-quinone oxidoreductase subunit H OS=Medicago truncatula GN=MTR_4g006100 PE=3 SV=1	0	55.414	12	11	23	11	1	899	103.3	5.59	79.36	11	High	Not Found	Not Found	High	High	High	High	High		0		0
High	Master Protein	G7KE15	Calcium ion-binding protein OS=Medicago truncatula GN=MTR_5g069410 PE=4 SV=1	0	55.308	20	12	23	12	1	566	64.6	5.34	89.13	12	Not Found	Not Found	Medium	Not Found	High	High	High	High		0		0
High	Master Protein	G7IED4	Mitochondrial Rho GTPase OS=Medicago truncatula GN=MTR_1g072280 PE=3 SV=1	0	55.299	18	11	13	11	1	640	71.4	7.25	53.47	11	Not Found	Not Found	High	High	High	High	Medium	High		0		0
High	Master Protein	G7IT45	Photosystem II reaction center protein H OS=Medicago truncatula GN=MTR_2g062930 PE=3 SV=1	0	55.218	24	4	55	3	1	119	13.3	5.06	237.61	4	Not Found	High	High	High	High	High	High	High	Deamidated [R16]	0		0
High	Master Protein	A0A072UMH4	Lipoxygenase OS=Medicago truncatula GN=MTR_4g066170 PE=3 SV=1	0	55.214	17	11	17	11	1	906	103.5	5.64	65.71	11	Not Found	High	Not Found	High	High	High	High	High		0		0
High	Master Protein	A0A072TM68	Cytochrome b5-like heme/steroid-binding domain protein OS=Medicago truncatula GN=MTR_8g027080 PE=3 SV=1	0	55.212	29	4	17	4	1	177	19.8	6.39	98.26	4	Not Found	Not Found	High	High	High	High	High	High		0		0
High	Master Protein	G7KQV2	SOUL heme-binding family protein OS=Medicago truncatula GN=MTR_7g104650 PE=4 SV=1	0	55.134	39	12	19	12	1	296	33.4	9.36	59.79	12	Not Found	High	High	High	High	High	High	High		0		0
High	Master Protein	B7FIY3	General regulatory factor 2 OS=Medicago truncatula GN=MTR_5g064580 PE=2 SV=1	0	55.002	51	12	33	8	1	260	29.2	4.78	84.66	12	Not Found	High	High	High	High	Not Found	Not Found	Not Found	Carboxymethyl [C103]	0		0
High	Master Protein	G7LBU3	Malic enzyme OS=Medicago truncatula GN=MTR_8g032040 PE=3 SV=1	0	54.898	24	12	13	12	1	604	66.6	6.76	44.09	12	Not Found	High	Not Found	High	High	Not Found	High	High		0		0
High	Master Protein	G7L099	Brefeldin A-inhibited guanine nucleotide-exchange protein OS=Medicago truncatula GN=MTR_7g075030 PE=4 SV=1	0	54.749	7	12	16	12	1	1789	199.4	5.67	59.54	12	Not Found	High	High	High	High	High	High	High		0		0
High	Master Protein	Q84RD8	Adenosylhomocysteinase OS=Medicago truncatula GN=AHC2 PE=3 SV=1	0	54.647	29	15	37	8	1	485	53.2	6.01	121.88	15	High	High	High	High	High	High	High	High	Deamidated [Q215; Q217]	0		0
High	Master Protein	Q8L8A0	Calcium-transporting ATPase OS=Medicago truncatula GN=MCA5 PE=2 SV=1	0	54.606	13	11	25	8	1	1014	110.7	6	89.14	11	High	High	High	High	High	High	High	High		0		0
High	Master Protein	G7ISM5	Enhancer of mRNA-decapping-like protein OS=Medicago truncatula GN=MTR_2g027690 PE=4 SV=2	0	54.604	10	11	13	10	1	1378	150.3	5.91	47.8	11	High	High	High	High	High	High	High	High		0		0
High	Master Protein	G7IEW7	Ribosomal protein S13P/S18e OS=Medicago truncatula GN=MTR_6g043210 PE=2 SV=1	0	54.55	47	11	33	1	1	152	17.6	10.54	108.47	11	Not Found	Not Found	Not Found	Not Found	Not Found	Not Found	High	High	Deamidated [Q97; Q102]	0		0
High	Master Protein	A0A072UCM6	Glutamate decarboxylase OS=Medicago truncatula GN=MTR_6g075210 PE=3 SV=1	0	54.545	22	12	17	12	1	499	56.1	5.91	60.49	12	Not Found	High	High	High	High	High	High	High		0		0
High	Master Protein	A0A072V5J0	Phospholipid-transporting ATPase OS=Medicago truncatula GN=MTR_3g037330 PE=3 SV=1	0	54.46	11	10	11	9	1	1154	130.8	7.37	42.96	10	Not Found	High	High	High	Not Found	Not Found	Not Found	High		0		0
High	Master Protein	Q2HTQ3	Granulin; Peptidase C1A, papain OS=Medicago truncatula GN=MTR_1g018840 PE=3 SV=1	0	54.23	18	8	25	8	1	474	52.2	6.28	95.48	8	Not Found	Not Found	High	High	High	High	High	High		0		0
High	Master Protein	G7L3A6	Iron-sulfur cluster biosynthesis family protein OS=Medicago truncatula GN=MTR_7g030010 PE=4 SV=1	0	54.218	21	11	20	11	1	507	57.4	8.7	61.51	11	Not Found	High	High	High	High	High	High	High		0		0
High	Master Protein	A2Q5W0	Tubulin alpha chain OS=Medicago truncatula GN=aTUB PE=3 SV=1	0	54.206	22	8	28	2	1	451	49.8	5.1	113.1	8	Not Found	Not Found	Not Found	Not Found	Medium	High	High	Not Found		0		0
High	Master Protein	I3S6I7	Vacuolar (H+)-ATPase G subunit OS=Medicago truncatula GN=MTR_1g064540 PE=2 SV=1	0	54.141	63	8	17	8	1	112	12.4	8.37	66.13	8	High	High	High	High	High	High	High	High		0		0
High	Master Protein	G7J6M6	Ubiquitin carboxyl-terminal hydrolase-like protein OS=Medicago truncatula GN=MTR_3g079840 PE=3 SV=2	0	54.086	13	12	17	11	1	1119	131.4	5.73	50.17	12	Not Found	High	High	High	High	High	High	High		0		0
High	Master Protein	G7I8R4	60S ribosomal protein L18-3 OS=Medicago truncatula GN=MTR_1g083460 PE=4 SV=1	0	54.076	32	5	27	2	1	187	20.8	11.39	126	5	Not Found	Not Found	Not Found	High	High	High	High	High		0		0
High	Master Protein	A0A072V9T0	LRR receptor-like kinase OS=Medicago truncatula GN=MTR_2g073650 PE=4 SV=1	0	54.066	13	14	31	7	1	1010	111.3	6.27	92.35	14	Not Found	Not Found	Not Found	High	High	High	High	High		0		0
High	Master Protein	G7JAE5	SPFH/band 7/PHB domain membrane-associated family protein OS=Medicago truncatula GN=MTR_3g106430 PE=4 SV=2	0	54.047	27	12	16	5	1	475	52.4	6.64	60.7	12	High	High	Not Found	High	High	High	Not Found	High		0		0
High	Master Protein	A0A072VX57	Caleosin CLO1-1 OS=Medicago truncatula GN=MTR_1g073640 PE=4 SV=1	0	54.043	28	9	23	9	1	241	27.3	6.54	104.57	9	High	High	Not Found	High	High	High	High	High		0		0
High	Master Protein	G7LE58	Translocon at the outer membrane ofs-like protein OS=Medicago truncatula GN=MTR_8g107280 PE=4 SV=1	0	53.966	22	13	24	13	1	594	64.6	8.84	71.78	13	High	High	High	High	High	High	High	High		0		0
High	Master Protein	A0A072U6L4	Glycyl-tRNA synthetase/glycine-tRNA ligase OS=Medicago truncatula GN=MTR_7g406850 PE=4 SV=1	0	53.937	22	14	26	8	1	686	77	6.55	84.03	14	High	High	High	High	High	High	High	High		0		0
High	Master Protein	G7JTQ1	RAB GTPase-like protein A5B OS=Medicago truncatula GN=MTR_4g063160 PE=4 SV=1	0	53.91	45	11	30	3	1	216	23.9	7.11	91.07	11	High	High	High	Not Found	Not Found	Not Found	Not Found	Not Found		0		0
High	Master Protein	A0A072URD4	RAB GTPase-like protein A2D OS=Medicago truncatula GN=MTR_4g099470 PE=4 SV=1	0	53.863	50	8	27	3	1	178	19.7	5.4	93.73	8	Not Found	Not Found	Not Found	Not Found	High	High	High	High		0		0
High	Master Protein	G7J3V3	CBS/octicosapeptide/phox/Bemp1 (PB1) domain protein OS=Medicago truncatula GN=MTR_3g099100 PE=4 SV=1	0	53.825	20	7	11	6	1	528	57	7.42	50.33	7	Not Found	High	High	High	High	Not Found	Not Found	High	Deamidated [Q267]	0		0
High	Master Protein	G7L7U1	AP-4 complex subunit epsilon OS=Medicago truncatula GN=MTR_8g072250 PE=4 SV=2	0	53.767	13	10	13	10	1	978	106.6	5.97	40.63	10	Not Found	High	Not Found	High	High	High	High	Not Found		0		0
High	Master Protein	A0A072TZH9	40S ribosomal protein S23-1 OS=Medicago truncatula GN=MTR_7g061155 PE=4 SV=1	0	53.76	22	8	39	8	1	255	27.8	8.53	156.89	8	Not Found	High	High	High	High	High	High	High		0		0
High	Master Protein	A0A072UP99	LRR receptor-like kinase OS=Medicago truncatula GN=MTR_4g095012 PE=4 SV=1	0	53.734	14	9	20	7	1	819	91.2	6.58	71.1	9	Not Found	Not Found	Not Found	High	High	High	High	High		0		0
High	Master Protein	G7JG50	Coatomer subunit gamma OS=Medicago truncatula GN=MTR_4g069920 PE=3 SV=1	0	53.662	17	11	16	7	1	885	98.2	5.21	64.98	11	Not Found	Not Found	Not Found	High	High	High	High	High		0		0
High	Master Protein	A0A072U9J1	Heat shock protein 81-2 OS=Medicago truncatula GN=MTR_6g452990 PE=3 SV=1	0	53.648	17	13	28	6	1	699	80.3	5.06	89.15	13	Not Found	Not Found	High	High	High	Not Found	Not Found	High		0		0
High	Master Protein	G7J970	NAD(P)-binding rossmann-fold protein OS=Medicago truncatula GN=MTR_3g105660 PE=2 SV=1	0	53.6	33	9	18	9	1	286	30.5	9.35	77.41	9	High	High	High	Not Found	High	High	High	High		0		0
High	Master Protein	A0A072VKP7	ATPase, AAA-type, CDC48 protein OS=Medicago truncatula GN=MTR_1g063380 PE=4 SV=1	0	53.59	18	14	23	3	1	810	89.7	5.19	78.02	14	High	Not Found	Not Found	High	High	Not Found	Not Found	Not Found		0		0
High	Master Protein	G7JR69	Uncoupling protein OS=Medicago truncatula GN=MTR_4g018750 PE=3 SV=1	0	53.568	37	12	34	8	1	303	32.4	9.51	108.72	12	Not Found	Not Found	Not Found	High	High	High	High	High	Deamidated [Q200]	0		0
High	Master Protein	A0A072V3N8	T-complex protein 1 subunit delta OS=Medicago truncatula GN=MTR_3g109925 PE=3 SV=1	0	53.561	19	10	13	10	1	532	57.4	7.93	53.99	10	Not Found	High	High	High	High	High	High	Not Found		0		0
High	Master Protein	A0A072VW87	UDP-glucuronic acid decarboxylase OS=Medicago truncatula GN=MTR_1g067530 PE=4 SV=1	0	53.544	29	11	15	10	1	460	51.5	8.56	49.01	11	Not Found	High	High	High	High	High	High	High	Deamidated [Q340]	0		0
High	Master Protein	G7JJT7	Signal recognition particle receptor subunit beta OS=Medicago truncatula GN=MTR_4g071550 PE=4 SV=1	0	53.49	35	6	14	3	1	260	29.1	8.51	61.93	6	Not Found	Not Found	High	High	High	High	High	High		0		0
High	Master Protein	I3T547	Emp24/gp25L/p24 family protein OS=Medicago truncatula GN=MTR_4g082315 PE=2 SV=1	0	53.408	22	5	13	5	1	216	24.8	6.54	64.91	5	Not Found	Not Found	High	High	High	High	High	Not Found		0		0
High	Master Protein	A0A072TLH1	Beta-galactosidase OS=Medicago truncatula GN=MTR_8g016230 PE=3 SV=1	0	53.28	16	9	18	7	1	838	92.6	8.4	75.13	9	Not Found	Not Found	High	High	High	High	High	High		0		0
High	Master Protein	Q8GV76	Auxin efflux carrier component OS=Medicago truncatula GN=PIN1 PE=3 SV=1	0	53.264	17	6	12	6	1	659	71.9	7.44	64.28	6	High	High	Not Found	High	High	High	High	High		0		0
High	Master Protein	G7JYX5	60S ribosomal protein L27a-3 OS=Medicago truncatula GN=MTR_5g033090 PE=2 SV=2	0	53.227	48	9	40	9	1	147	16.6	10.71	132.8	9	High	High	High	High	High	High	High	High		0		0
High	Master Protein	A0A072TNQ4	Mechanosensitive ion channel protein MscS OS=Medicago truncatula GN=MTR_8g028760 PE=4 SV=1	0	53.199	12	6	12	6	1	548	59.4	9.01	52.62	6	Not Found	Not Found	Not Found	Not Found	High	High	High	High		0		0
High	Master Protein	G7IN27	Metaxin-like protein OS=Medicago truncatula GN=MTR_2g036910 PE=4 SV=1	0	53.02	32	5	8	5	1	330	37	5.21	56.81	5	Not Found	High	Not Found	Not Found	High	High	High	High		0		0
High	Master Protein	A0A072VQS8	Small GTPase family RAB protein OS=Medicago truncatula GN=MTR_1g029450 PE=4 SV=1	0	52.877	45	11	16	9	1	215	24	5.85	60.56	11	Not Found	High	High	Not Found	High	High	High	High		0		0
High	Master Protein	G7KPX0	Receptor-like kinase OS=Medicago truncatula GN=MTR_6g088610 PE=4 SV=1	0	52.862	18	9	23	8	1	674	71.6	7.97	78.22	9	Not Found	Not Found	High	High	High	High	High	High		0		0
High	Master Protein	G7L8C0	Synaptobrevin-like protein OS=Medicago truncatula GN=MTR_8g022210 PE=2 SV=1	0	52.74	48	8	15	8	1	218	25.3	9.03	66.64	8	Not Found	High	High	High	High	High	High	High	Deamidated [Q191]	0		0
High	Master Protein	G7KPG2	Type II peroxiredoxin OS=Medicago truncatula GN=MTR_6g087990 PE=2 SV=1	0	52.635	56	8	17	8	1	162	17.5	5.87	79.2	8	Not Found	Not Found	High	High	High	High	High	High		0		0
High	Master Protein	B7FMJ8	Ribosomal protein S13P/S18e OS=Medicago truncatula GN=MTR_1g098170 PE=2 SV=1	0	52.508	47	11	32	1	1	152	17.6	10.54	100.37	11	Not Found	Not Found	Not Found	Not Found	Not Found	High	Not Found	Not Found	Deamidated [Q97; Q102]	0		0
High	Master Protein	G7KG24	Rossmann-fold NAD(P)-binding domain protein OS=Medicago truncatula GN=MTR_5g077840 PE=4 SV=1	0	52.378	28	8	11	8	1	459	50.8	6.77	52.75	8	Not Found	Not Found	High	High	High	High	High	High		0		0
High	Master Protein	G7KTS9	LRR receptor-like kinase OS=Medicago truncatula GN=MTR_7g021570 PE=3 SV=2	0	52.35	14	14	28	11	1	963	107.3	7.08	80.13	14	High	Not Found	High	High	High	High	High	High		0		0
High	Master Protein	G7KQ77	Fructose-bisphosphate aldolase class-II protein OS=Medicago truncatula GN=MTR_6g069660 PE=4 SV=2	0	52.278	17	10	19	10	1	695	74.7	7.12	70.86	10	Not Found	High	High	High	High	High	High	High		0		0
High	Master Protein	A2Q5A5	NADH-quinone oxidoreductase subunit B OS=Medicago truncatula GN=ndhK PE=3 SV=1	0	52.262	36	7	12	7	1	227	25.7	8.73	63.53	7	Not Found	Not Found	High	Not Found	High	High	High	High		0		0
High	Master Protein	A0A072TKA0	Alpha/beta fold hydrolase OS=Medicago truncatula GN=MTR_0004s0330 PE=4 SV=1	0	52.238	25	10	26	10	1	433	47.5	8.03	102.39	10	High	High	High	High	High	High	High	High		0		0
High	Master Protein	G7I9F7	Importin subunit alpha OS=Medicago truncatula GN=MTR_1g083810 PE=3 SV=1	0	52.183	18	6	13	4	1	533	59	5.31	65.64	6	Not Found	High	Not Found	High	High	High	High	High		0		0
High	Master Protein	G7JYR0	Prolyl 4-hydroxylase alpha-like protein OS=Medicago truncatula GN=MTR_5g022960 PE=4 SV=1	0	52.159	25	6	13	5	1	289	32.7	7.88	62.98	6	High	Not Found	Not Found	Not Found	Not Found	High	High	High		0		0
High	Master Protein	G7ITF9	RAB GTPase-like protein A1D OS=Medicago truncatula GN=MTR_2g075950 PE=2 SV=1	0	52.158	43	10	21	3	1	217	24	6.37	71.27	10	High	Not Found	Not Found	Not Found	Not Found	High	Not Found	Not Found		0		0
High	Master Protein	A0A072U9P1	DUF21 domain plant protein OS=Medicago truncatula GN=MTR_6g045467 PE=4 SV=1	0	52.156	21	8	12	3	1	468	51.1	5.44	46.22	8	High	High	High	High	High	Not Found	Not Found	Not Found		0		0
High	Master Protein	G7IQI5	SOUL heme-binding family protein OS=Medicago truncatula GN=MTR_2g054130 PE=4 SV=1	0	52.148	25	11	22	11	1	382	43.9	8.75	69.25	11	High	High	High	High	High	High	High	High		0		0
High	Master Protein	Q1SMZ8	Peptidylprolyl isomerase OS=Medicago truncatula GN=MTR_8g107010 PE=4 SV=1	0	52.034	40	8	16	8	1	256	27.5	6.6	63.17	8	Not Found	High	High	High	Not Found	High	High	High		0		0
High	Master Protein	A0A072URW6	GDP-fucose protein O-fucosyltransferase OS=Medicago truncatula GN=MTR_4g008200 PE=4 SV=1	0	51.97	24	10	21	10	1	419	46.8	6.23	85.28	10	Not Found	High	High	High	High	High	High	High		0		0
High	Master Protein	G7K3L9	2-oxoacid dehydrogenase acyltransferase family protein OS=Medicago truncatula GN=MTR_5g093300 PE=4 SV=1	0	51.943	18	11	22	2	1	455	49.7	9.19	70.97	11	Not Found	Not Found	High	High	Not Found	High	Not Found	Not Found		0		0
High	Master Protein	G7IU25	Phosphoenolpyruvate carboxylase OS=Medicago truncatula GN=MTR_2g092930 PE=3 SV=1	0	51.94	12	12	17	6	1	966	110.4	6.15	52.24	12	Not Found	High	High	High	High	High	High	Not Found		0		0
High	Master Protein	A0A072TUG6	Major intrinsic protein (MIP) family transporter OS=Medicago truncatula GN=MTR_8g098375 PE=3 SV=1	0	51.91	34	8	32	5	1	287	30.9	8.84	123.23	8	High	High	High	High	High	High	High	High		0		0
High	Master Protein	G7JFC4	Raffinose synthase or seed inhibition protein OS=Medicago truncatula GN=MTR_4g115330 PE=4 SV=2	0	51.902	14	9	12	9	1	795	87.7	5.91	51.92	9	Not Found	Not Found	Not Found	High	High	High	High	High		0		0
High	Master Protein	A0A072TWE9	Nuclear matrix constituent-like protein OS=Medicago truncatula GN=MTR_7g018610 PE=4 SV=1	0	51.835	13	15	17	15	1	1177	134.6	5.07	61.57	15	High	High	High	High	High	Not Found	Not Found	Not Found		0		0
High	Master Protein	G7L523	Plant/F21F14-40 protein OS=Medicago truncatula GN=MTR_7g117970 PE=4 SV=1	0	51.774	18	6	33	6	1	265	29.3	9.73	132.24	6	High	High	High	High	High	High	High	High	Deamidated [Q149]	0		0
High	Master Protein	G7KHJ0	Uncharacterized protein OS=Medicago truncatula GN=MTR_6g005540 PE=4 SV=1	0	51.727	25	9	35	2	1	346	38	8.15	111.59	9	High	Not Found	High	High	High	High	High	Not Found		0		0
High	Master Protein	G7I4H1	Patatin OS=Medicago truncatula GN=MTR_1g019940 PE=3 SV=1	0	51.647	26	7	13	7	1	417	46	6.21	67.11	7	Not Found	Not Found	High	High	Medium	Not Found	High	High		0		0
High	Master Protein	G7L3V5	ATPase, AAA-type, CDC48 protein OS=Medicago truncatula GN=MTR_7g101870 PE=4 SV=2	0	51.638	16	13	21	2	1	809	89.7	5.29	74.96	13	Not Found	Not Found	Not Found	Medium	Not Found	High	Not Found	Not Found		0		0
High	Master Protein	G7JM35	Peptidylprolyl isomerase OS=Medicago truncatula GN=MTR_4g055500 PE=4 SV=2	0	51.618	23	10	14	10	1	626	70.7	5.52	55.39	10	Not Found	Not Found	High	High	High	Not Found	High	High		0		0
High	Master Protein	G7KQW9	Signal recognition particle 54 kDa protein OS=Medicago truncatula GN=MTR_7g104890 PE=3 SV=1	0	51.591	24	12	17	12	1	553	60.8	9.32	62.59	12	Not Found	Not Found	High	High	High	High	High	High		0		0
High	Master Protein	P93333	Class-10 pathogenesis-related protein 1 OS=Medicago truncatula GN=PR10-1 PE=2 SV=1	0	51.59	52	7	20	5	1	157	16.6	4.73	83.77	7	High	High	High	High	High	High	High	High	Deamidated [Q39]	0		0
High	Master Protein	A0A072TFV7	50S ribosomal protein L6 OS=Medicago truncatula GN=MTR_0316s0010 PE=3 SV=1	0	51.541	60	11	24	11	1	163	18.3	9.72	78.8	11	High	Not Found	High	High	High	High	High	High		0		0
High	Master Protein	G7K0W0	LRR receptor-like kinase OS=Medicago truncatula GN=MTR_5g075650 PE=3 SV=1	0	51.31	13	9	17	6	1	947	104.8	6.32	70.01	9	Not Found	Not Found	Not Found	High	High	High	High	High	Deamidated [Q662]	0		0
High	Master Protein	G7LJ51	Cytochrome P450 family 72 protein OS=Medicago truncatula GN=MTR_8g042000 PE=3 SV=1	0	51.27	24	13	22	10	1	524	59.3	8.57	77.35	13	Not Found	High	Not Found	High	High	High	High	High	Deamidated [Q302]	0		0
High	Master Protein	A0A072V0M0	PGR5-like protein 1A OS=Medicago truncatula GN=MTR_4g102440 PE=4 SV=1	0	51.196	15	5	13	5	1	319	35.5	5.06	70.69	5	High	High	High	Not Found	Not Found	Not Found	High	High	Deamidated [R170]; Phospho [S173]	1	Phospho [S173]	0
High	Master Protein	B7FN45	Transmembrane protein, putative OS=Medicago truncatula GN=MTR_7g072680 PE=2 SV=1	0	51.174	31	8	12	8	1	228	25.9	8.15	46.27	8	Not Found	Not Found	High	High	High	High	High	High		0		0
High	Master Protein	A0A072VK14	3-deoxy-manno-octulosonate cytidylyltransferase OS=Medicago truncatula GN=MTR_1g057850 PE=3 SV=1	0	51.113	22	9	20	9	1	596	66.6	6.3	58.41	9	High	Not Found	High	High	High	High	High	High		0		0
High	Master Protein	A0A072UUQ5	NAD(P)H dehydrogenase B2 OS=Medicago truncatula GN=MTR_4g045997 PE=4 SV=1	0	51.088	22	11	19	11	1	577	64.6	5.88	61.86	11	High	High	High	Not Found	High	High	High	High		0		0
High	Master Protein	G7JCN5	Trehalose-6-phosphate synthase domain protein OS=Medicago truncatula GN=MTR_4g080160 PE=4 SV=1	0	50.934	11	9	9	8	1	861	97.5	5.78	36.93	9	Not Found	High	Not Found	High	High	High	High	High		0		0
High	Master Protein	G7JMF0	CXE carboxylesterase OS=Medicago truncatula GN=MTR_4g086480 PE=4 SV=1	0	50.909	19	5	8	5	1	321	35.6	5.85	36.52	5	Not Found	High	High	Medium	High	Not Found	Not Found	High		0		0
High	Master Protein	G7LAR7	CCR4-NOT transcription complex protein, putative OS=Medicago truncatula GN=MTR_8g005820 PE=4 SV=2	0	50.884	6	14	18	14	1	2393	265.8	5.87	53.8	14	Not Found	High	High	High	High	High	High	High		0		0
High	Master Protein	G7JU01	Glutathione-regulated potassium-efflux system protein kefB OS=Medicago truncatula GN=MTR_4g092790 PE=4 SV=2	0	50.812	12	9	15	9	1	796	86.5	5.43	59.35	9	High	High	High	High	High	High	High	High		0		0
High	Master Protein	B7FJQ4	Malate dehydrogenase OS=Medicago truncatula GN=MTR_1g043040 PE=2 SV=1	0	50.783	20	8	15	4	1	332	35.5	6.54	53.4	8	Not Found	Not Found	High	High	Not Found	High	High	High		0		0
High	Master Protein	A0A072U288	Transducin/WD-like repeat-protein OS=Medicago truncatula GN=MTR_7g074890 PE=4 SV=1	0	50.778	31	13	19	13	1	432	46.8	8.82	63.31	13	Not Found	Not Found	Not Found	High	High	High	High	High		0		0
High	Master Protein	G7IJ55	U5 small nuclear ribonucleoprotein 200 kDa helicase OS=Medicago truncatula GN=MTR_2g064740 PE=4 SV=2	0	50.714	6	9	11	9	1	2188	248.1	5.77	45.07	9	Not Found	Not Found	High	High	Not Found	High	High	High		0		0
High	Master Protein	B7FGH4	Synaptobrevin-like protein OS=Medicago truncatula GN=MTR_4g083490 PE=2 SV=1	0	50.471	37	11	39	8	1	220	24.8	8.91	135.3	11	High	High	High	High	High	High	High	High		0		0
High	Master Protein	G7IV14	Cellulose synthase E1-like protein OS=Medicago truncatula GN=MTR_3g060240 PE=3 SV=1	0	50.388	15	12	16	6	1	736	84.5	8.1	56.31	12	Not Found	High	High	Not Found	High	High	High	High		0		0
High	Master Protein	I3TAF1	60S ribosomal L28-like protein OS=Medicago truncatula GN=MTR_8g015570 PE=2 SV=1	0	50.329	55	9	41	5	1	143	16.1	10.77	145.59	9	Not Found	Not Found	High	High	High	High	High	High	Deamidated [Q29]	0		0
High	Master Protein	G7K6V0	Methyltransferase PMT16, putative OS=Medicago truncatula GN=MTR_5g026930 PE=4 SV=1	0	50.324	17	10	18	9	1	598	68.5	8.68	65.31	10	Not Found	High	Medium	High	High	High	High	High		0		0
High	Master Protein	G7IV47	LRR receptor-like kinase OS=Medicago truncatula GN=MTR_3g062500 PE=4 SV=1	0	50.307	17	11	22	6	1	660	72	8.4	79.89	11	Not Found	Not Found	Not Found	High	High	High	High	High		0		0
High	Master Protein	G7JZW9	Glycine cleavage system H protein OS=Medicago truncatula GN=MTR_5g014260 PE=2 SV=1	0	50.266	39	4	14	4	1	166	17.8	5.19	73.77	4	Not Found	Not Found	Not Found	High	High	High	High	Not Found		0		0
High	Master Protein	G7IM71	RAB GTPase-like protein A1D OS=Medicago truncatula GN=MTR_2g083860 PE=4 SV=1	0	50.244	44	11	34	6	1	218	24.1	6.09	106.53	11	High	High	High	High	High	High	High	High		0		0
High	Master Protein	A0A072TIU5	DUF3411 domain protein OS=Medicago truncatula GN=MTR_0013s0150 PE=4 SV=1	0	50.216	21	8	23	7	1	381	40.9	7.85	81.84	8	Not Found	Not Found	High	High	High	High	High	High		0		0
High	Master Protein	G7L0L9	RAB GTPase-like protein A5B OS=Medicago truncatula GN=MTR_7g100020 PE=4 SV=1	0	50.184	44	11	36	1	1	216	23.9	7.83	103.59	11	Not Found	High	Not Found	Not Found	Not Found	Not Found	Not Found	Not Found		0		0
High	Master Protein	G7IUE0	LRR receptor-like kinase family protein OS=Medicago truncatula GN=MTR_2g098250 PE=4 SV=1	0	50.143	23	8	12	7	1	375	40.8	8.57	48.69	8	Not Found	Not Found	High	High	Not Found	Not Found	Not Found	High		0		0
High	Master Protein	A0A072TMG8	Grave disease carrier protein OS=Medicago truncatula GN=MTR_8g027975 PE=3 SV=1	0	50.138	34	13	28	10	1	361	39	9.45	64.55	13	High	High	High	High	High	High	High	High		0		0
High	Master Protein	A0A072VH23	S-adenosylmethionine-dependent methyltransferase, putative OS=Medicago truncatula GN=MTR_1g442840 PE=4 SV=1	0	50.128	19	11	18	5	1	626	70.8	5.78	55.97	11	Not Found	Not Found	Not Found	Not Found	Not Found	High	High	High		0		0
High	Master Protein	G7JNH3	Alanine--tRNA ligase OS=Medicago truncatula GN=MTR_4g074640 PE=3 SV=1	0	50.045	14	12	15	12	1	950	104.5	6.07	50.53	12	High	High	High	High	High	High	High	High		0		0
High	Master Protein	G7KYF5	Drug resistance transporter-like ABC domain protein OS=Medicago truncatula GN=MTR_7g098740 PE=3 SV=2	0	50.004	8	13	35	2	1	1414	160.4	8.7	98.82	13	High	High	High	High	High	High	High	High		0		0
High	Master Protein	A0A072VNF0	Nucleoporin autopeptidase OS=Medicago truncatula GN=MTR_1g078040 PE=4 SV=1	0	49.996	12	10	15	10	1	1012	104.5	8.54	50.97	10	Not Found	Not Found	High	High	High	High	High	High	Deamidated [Q798; Q800; Q801]	0		0
High	Master Protein	G7IEX3	Vacuolar-sorting receptor-like protein OS=Medicago truncatula GN=MTR_1g106940 PE=4 SV=2	0	49.979	23	10	15	9	1	632	69.5	5.55	62.03	10	Not Found	High	High	High	Not Found	High	High	High	Carboxymethyl [C495]	0		0
High	Master Protein	A0A072UHJ0	Ubiquitin-specific protease family C19 protein OS=Medicago truncatula GN=MTR_4g007930 PE=4 SV=1	0	49.966	19	9	13	8	1	487	52.2	9.61	51.83	9	High	High	Medium	High	High	High	High	Not Found	Carboxymethyl [C320]; Phospho [S76]	0		0
High	Master Protein	G7K283	Ferritin OS=Medicago truncatula GN=MTR_5g083170 PE=2 SV=1	0	49.957	30	8	21	7	1	249	27.9	6.13	79.02	8	Not Found	Not Found	Not Found	High	High	High	High	High		0		0
High	Master Protein	A0A072UEC5	40S ribosomal S10-like protein OS=Medicago truncatula GN=MTR_5g010025 PE=4 SV=1	0	49.928	37	9	24	2	1	207	22.9	9.41	86.77	9	High	High	Not Found	Not Found	Not Found	Not Found	Not Found	High		0		0
High	Master Protein	A0A072TYH7	Oxygen-evolving complex/thylakoid lumenal 25.6 kDa protein OS=Medicago truncatula GN=MTR_7g023290 PE=4 SV=1	0	49.875	33	8	18	8	1	240	26.8	9.44	64.1	8	Not Found	High	Not Found	High	High	High	High	High		0		0
High	Master Protein	G7KLA3	ERD (Early-responsive to dehydration stress) family protein OS=Medicago truncatula GN=MTR_6g012870 PE=4 SV=2	0	49.865	9	9	13	9	1	712	81.2	8.5	45.57	9	Not Found	High	High	High	Not Found	High	Not Found	High		0		0
High	Master Protein	G7IN66	Translation elongation factor EF1B, gamma chain OS=Medicago truncatula GN=MTR_2g005570 PE=4 SV=1	0	49.827	22	9	23	3	1	418	47.7	7.5	74.84	9	High	High	Not Found	Not Found	High	High	Not Found	Not Found		0		0
High	Master Protein	G7K503	Fasciclin-like arabinogalactan protein OS=Medicago truncatula GN=MTR_5g098060 PE=2 SV=1	0	49.817	22	5	20	5	1	262	27.8	5.34	106.31	5	Not Found	High	High	High	High	High	High	High		0		0
High	Master Protein	B7FI12	ADP-ribosylation factor-like protein A1D OS=Medicago truncatula GN=MTR_1g086480 PE=2 SV=1	0	49.686	49	10	25	10	1	181	20.7	6.95	95.69	10	High	High	High	High	High	High	High	High		0		0
High	Master Protein	A0A072UTX8	DnaJ heat shock amino-terminal domain protein OS=Medicago truncatula GN=MTR_3g435140 PE=4 SV=1	0	49.65	18	9	10	9	1	706	79.4	6.81	40.41	9	Not Found	Not Found	High	High	High	High	High	High		0		0
High	Master Protein	G7JH62	50S ribosomal protein L2 OS=Medicago truncatula GN=MTR_4g051430 PE=3 SV=1	0	49.617	31	14	35	12	1	382	43.5	10.71	103.31	14	Not Found	High	Not Found	High	High	High	High	High		0		0
High	Master Protein	G7IEN7	Sec-independent protein translocase OS=Medicago truncatula GN=MTR_1g100220 PE=4 SV=1	0	49.488	48	9	17	9	1	258	27.9	7.4	68.64	9	High	High	High	High	High	High	High	High	Deamidated [Q181]	0		0
High	Master Protein	B7FIS2	Translocon-associated protein alpha subunit OS=Medicago truncatula GN=MTR_3g117740 PE=2 SV=1	0	49.469	23	7	17	7	1	258	28.1	5.12	90.52	7	Not Found	Not Found	High	High	High	High	High	High	Deamidated [Q97]	0		0
High	Master Protein	A0A072U091	Electron transport SCO1/SenC family protein, putative OS=Medicago truncatula GN=MTR_7g069070 PE=4 SV=1	0	49.333	22	7	21	7	1	329	36.7	7.34	94.12	7	Not Found	High	High	High	High	High	High	High		0		0
High	Master Protein	A0A072V3L0	Cullin-associated NEDD8-dissociated protein OS=Medicago truncatula GN=MTR_4g134620 PE=4 SV=1	0	49.304	7	6	11	6	1	1218	134.3	6	49.02	6	Not Found	High	Not Found	High	High	High	High	High		0		0
High	Master Protein	I3SKQ8	60S ribosomal protein L24-2 OS=Medicago truncatula GN=MTR_7g103320 PE=2 SV=1	0	49.236	37	11	29	11	1	163	18.5	10.71	106.85	11	High	High	High	High	High	High	High	High		0		0
High	Master Protein	G7K2J3	60S ribosomal protein L26-1 OS=Medicago truncatula GN=MTR_5g015570 PE=2 SV=2	0	49.178	62	13	33	6	1	146	16.7	11.02	113.43	13	Not Found	High	High	High	High	High	High	High	Deamidated [Q92]	0		0
High	Master Protein	G7IHN4	Histone H2A OS=Medicago truncatula GN=MTR_2g096610 PE=2 SV=1	0	49.151	34	6	30	1	1	148	15.7	10.86	114.71	6	Not Found	Not Found	Not Found	Not Found	Not Found	Not Found	Not Found	High		0		0
High	Master Protein	B7FKU9	Cytoplasmic C-1-tetrahydrofolate synthase OS=Medicago truncatula GN=MTR_7g108580 PE=2 SV=1	0	49.151	44	7	10	7	1	293	31.5	7.53	52.8	7	Not Found	High	High	High	Not Found	High	High	High		0		0
High	Master Protein	G7K3F3	Peroxisomal small heat shock protein OS=Medicago truncatula GN=MTR_5g091960 PE=3 SV=1	0	49.062	38	7	11	7	1	259	29.1	7.46	50.04	7	High	Not Found	High	Not Found	Not Found	High	High	High	Deamidated [Q118]	0		0
High	Master Protein	E2FKJ1	Sieve element occlusion by forisomes 2 OS=Medicago truncatula GN=SEO-F2 PE=2 SV=1	0	48.993	15	8	11	8	1	675	77.3	7.18	46.43	8	Not Found	High	High	High	High	High	High	High		0		0
High	Master Protein	G7K9G7	Thioredoxin-like protein OS=Medicago truncatula GN=MTR_5g018580 PE=4 SV=1	0	48.892	30	6	22	6	1	263	29.4	6.61	78.05	6	High	High	High	High	High	High	High	High		0		0
High	Master Protein	G7J4G1	Plastocyanin-like domain protein OS=Medicago truncatula GN=MTR_3g099580 PE=4 SV=1	0	48.878	35	4	11	4	1	186	19	7.4	64.43	4	Not Found	Not Found	Not Found	High	High	High	High	High	Carboxymethyl [C76]	0		0
High	Master Protein	G7J5D6	Transmembrane protein, putative OS=Medicago truncatula GN=MTR_3g077550 PE=4 SV=2	0	48.823	10	10	15	10	1	1082	120.2	9.23	58.6	10	Not Found	Not Found	High	High	High	High	High	Not Found		0		0
High	Master Protein	G7JVN9	UDP-glucose:sterol 3-O-glucosyltransferase OS=Medicago truncatula GN=MTR_4g022610 PE=4 SV=2	0	48.809	19	8	21	1	1	621	68.3	6.28	85.08	8	Not Found	Not Found	Not Found	Not Found	Not Found	Not Found	Not Found	High		0		0
High	Master Protein	G7JTX3	26S proteasome regulatory subunit S2 1B OS=Medicago truncatula GN=MTR_4g078780 PE=4 SV=1	0	48.796	16	11	16	11	1	886	97.2	5.24	60.36	11	High	Not Found	High	High	High	High	High	High		0		0
High	Master Protein	G7LHY7	Lipase/lipooxygenase, PLAT/LH2 family protein, putative OS=Medicago truncatula GN=MTR_8g085620 PE=4 SV=1	0	48.789	14	5	8	5	1	488	54.7	7.96	46.66	5	Not Found	Not Found	Not Found	Not Found	High	High	High	High		0		0
High	Master Protein	G7JNQ7	Topoisomerase-like protein OS=Medicago truncatula GN=MTR_4g104360 PE=4 SV=2	0	48.617	13	8	10	8	1	703	77.4	5.1	40.9	8	Not Found	Not Found	High	High	High	Not Found	High	Not Found		0		0
High	Master Protein	A0A072U2W1	Triosephosphate isomerase OS=Medicago truncatula GN=MTR_7g103020 PE=3 SV=1	0	48.606	36	9	13	8	1	312	33.4	7.02	54.42	9	High	Not Found	Not Found	High	High	Not Found	High	High		0		0
High	Master Protein	G7IBZ0	UDP-glucose:sterol glucosyltransferase OS=Medicago truncatula GN=MTR_1g098640 PE=4 SV=2	0	48.592	17	9	17	9	1	625	69.4	6.11	51.86	9	Not Found	High	High	High	High	High	High	High		0		0
High	Master Protein	A0A072VAP3	Cytochrome P450 family 72 protein OS=Medicago truncatula GN=MTR_2g072330 PE=4 SV=1	0	48.566	23	8	15	4	1	416	48.1	9.35	50.05	8	Not Found	Not Found	Not Found	Not Found	High	High	High	High		0		0
High	Master Protein	A0A072TNQ7	Phosphatidylcholine-sterol acyltransferase OS=Medicago truncatula GN=MTR_8g019570 PE=4 SV=1	0	48.545	19	12	21	12	1	677	75.5	6.84	63.49	12	Not Found	Not Found	High	High	High	High	High	High		0		0
High	Master Protein	G7J9R6	60S ribosomal L6-like protein OS=Medicago truncatula GN=MTR_3g094570 PE=4 SV=1	0	48.536	48	12	30	3	1	233	26	10.23	103.67	12	Not Found	High	High	Not Found	High	Not Found	High	High		0		0
High	Master Protein	A0A072UY96	Fasciclin-like arabinogalactan protein OS=Medicago truncatula GN=MTR_3g460780 PE=4 SV=1	0	48.452	17	5	8	5	1	421	44.9	5.64	47.98	5	Not Found	Not Found	Not Found	Not Found	High	Not Found	High	High		0		0
High	Master Protein	G7LBB5	RAB GTPase-like protein A1D OS=Medicago truncatula GN=MTR_8g092020 PE=4 SV=1	0	48.407	44	8	16	5	1	209	23.4	5.87	52.02	8	Not Found	Not Found	Not Found	High	Not Found	High	High	High		0		0
High	Master Protein	G7KGX9	M50 family peptidase OS=Medicago truncatula GN=MTR_5g082260 PE=4 SV=2	0	48.392	23	7	12	7	1	514	56.1	5.34	57.97	7	Not Found	High	High	High	High	Not Found	High	High		0		0
High	Master Protein	G7IMZ7	Lysine--tRNA ligase OS=Medicago truncatula GN=MTR_2g036600 PE=3 SV=1	0	48.307	20	10	17	10	1	604	69	6.34	67.47	10	High	High	High	High	High	High	High	Not Found		0		0
High	Master Protein	A0A072U108	Peptidyl-prolyl cis-trans isomerase OS=Medicago truncatula GN=MTR_8g059435 PE=4 SV=1	0	48.265	23	8	10	8	1	424	46.3	5.78	45.67	8	Not Found	High	High	High	High	High	High	High		0		0
High	Master Protein	G7LGI5	Respiratory burst oxidase-like protein D OS=Medicago truncatula GN=MTR_8g095520 PE=4 SV=1	0	48.244	13	12	24	9	1	898	101.8	8.4	65.34	12	Not Found	High	High	Not Found	High	High	High	High		0		0
High	Master Protein	G7KLJ7	Cytochrome b5-like heme/steroid-binding domain protein OS=Medicago truncatula GN=MTR_6g054890 PE=2 SV=1	0	48.226	34	5	19	2	1	235	25.8	4.77	70.5	5	Not Found	High	High	High	High	High	High	High		0		0
High	Master Protein	A0A072THF6	NADH dehydrogenase [ubiquinone] iron-sulfur protein OS=Medicago truncatula GN=MTR_0212s0080 PE=3 SV=1	0	48.226	18	5	15	5	1	220	26.5	8.38	59.7	5	Not Found	Not Found	High	High	High	High	High	High		0		0
High	Master Protein	A0A072VRS4	RAB GTPase-like protein A5B OS=Medicago truncatula GN=MTR_1g115325 PE=4 SV=1	0	48.206	43	11	38	1	1	215	23.8	7.83	111.2	11	Not Found	High	High	High	Not Found	Not Found	Not Found	Not Found		0		0
High	Master Protein	G7KS23	WPP domain interacting tail-anchored protein OS=Medicago truncatula GN=MTR_7g017690 PE=4 SV=1	0	48.161	18	12	14	12	1	626	70.6	4.64	45.91	12	Not Found	High	High	High	High	Not Found	High	Not Found		0		0
High	Master Protein	G7J2Y6	Peroxidase OS=Medicago truncatula GN=MTR_3g072190 PE=3 SV=1	0	48.133	28	7	25	5	1	318	34.5	8.85	73.4	7	Not Found	Not Found	Not Found	High	High	High	High	High	Deamidated [R147; R148]	0		0
High	Master Protein	G7J4F3	Bacterial long-chain fatty acid CoA synthetase OS=Medicago truncatula GN=MTR_3g087980 PE=4 SV=2	0	48.113	19	11	27	9	1	694	76.1	7.43	83.39	11	Not Found	Not Found	Not Found	High	High	High	High	High		0		0
High	Master Protein	G7JIK6	Transmembrane protein, putative OS=Medicago truncatula GN=MTR_4g071010 PE=4 SV=1	0	48.049	18	8	12	8	1	442	49.2	8.47	47.54	8	Not Found	High	Not Found	Medium	Not Found	High	High	High		0		0
High	Master Protein	G7K0X0	Vacuolar-sorting receptor-like protein OS=Medicago truncatula GN=MTR_5g005100 PE=4 SV=1	0	48.02	16	11	26	10	1	622	68.7	6.05	89.12	11	Not Found	High	High	High	High	High	High	High	Carboxymethyl [C487]	0		0
High	Master Protein	G7L3I8	Potassium efflux antiporter (Fragment) OS=Medicago truncatula GN=MTR_7g076700 PE=4 SV=2	0	48.003	14	9	22	5	1	614	64.6	5.74	69.49	9	Not Found	High	Not Found	Not Found	High	High	High	Medium		0		0
High	Master Protein	G7JQ35	Pti1-like kinase OS=Medicago truncatula GN=MTR_4g123870 PE=4 SV=1	0	48.002	22	7	19	5	1	393	43.5	8.95	64.78	7	Not Found	Not Found	High	High	High	High	High	High	Deamidated [R186]	0		0
High	Master Protein	A0A072TPT8	Calmodulin-binding receptor-like cytoplasmic kinase OS=Medicago truncatula GN=MTR_8g028880 PE=3 SV=1	0	47.989	26	11	18	11	1	440	48.8	9.07	56.8	11	Not Found	Not Found	High	High	High	High	High	High		0		0
High	Master Protein	G7JPK2	Peptidyl-prolyl cis-trans isomerase OS=Medicago truncatula GN=MTR_4g075290 PE=2 SV=1	0	47.927	48	8	20	7	1	172	18.2	8.18	81.51	8	High	High	High	High	High	High	High	High	Carboxymethyl [C122]	0		0
High	Master Protein	G7I4S6	Uncharacterized protein OS=Medicago truncatula GN=MTR_1g075490 PE=4 SV=1	0	47.926	42	7	24	7	1	424	32.8	10.52	63.2	7	Not Found	High	High	High	High	High	High	High		0		0
High	Master Protein	G7JR54	Guanine nucleotide-exchange protein, putative OS=Medicago truncatula GN=MTR_4g124430 PE=4 SV=2	0	47.877	8	11	18	11	1	1788	198.1	5.57	65.79	11	High	High	High	High	High	High	High	High		0		0
High	Master Protein	A0A072V987	Class I glutamine amidotransferase superfamily protein OS=Medicago truncatula GN=MTR_2g078060 PE=4 SV=1	0	47.823	23	8	12	8	1	440	46.8	7.23	52.09	8	Not Found	High	High	High	Not Found	High	High	High		0		0
High	Master Protein	G7IBN4	RAB GTPase-like protein A5B OS=Medicago truncatula GN=MTR_1g068730 PE=2 SV=1	0	47.823	46	11	35	3	1	216	23.9	7.11	101.05	11	Medium	Not Found	Not Found	High	Not Found	High	High	Not Found		0		0
High	Master Protein	G7K0K7	Emp24/gp25L/p24 family protein OS=Medicago truncatula GN=MTR_5g098250 PE=2 SV=1	0	47.765	44	7	13	7	1	214	24.8	6.34	60.54	7	Not Found	Not Found	High	High	High	High	Not Found	High		0		0
High	Master Protein	A0A072THI5	Ubiquinone biosynthesis protein UbiB OS=Medicago truncatula GN=MTR_0053s0030 PE=4 SV=1	0	47.741	16	12	23	10	1	701	78.1	6	73.45	12	High	High	Not Found	High	High	High	High	High		0		0
High	Master Protein	G7KN99	Cytochrome c1, heme protein OS=Medicago truncatula GN=MTR_6g023290 PE=4 SV=1	0	47.74	28	5	16	2	1	307	33.5	7.24	76.33	5	Not Found	Not Found	High	Not Found	High	High	Not Found	Not Found		0		0
High	Master Protein	G7K7B3	Ca(2+)-dependent nuclease-like protein OS=Medicago truncatula GN=MTR_5g083720 PE=2 SV=1	0	47.668	25	6	13	6	1	326	37	8.95	50.94	6	Not Found	High	Not Found	High	High	High	High	High		0		0
High	Master Protein	A0A072TYM9	Eukaryotic translation initiation factor 3 subunit OS=Medicago truncatula GN=MTR_8g027685 PE=4 SV=1	0	47.665	7	9	10	8	1	1827	200.9	6.42	37.25	9	Not Found	High	High	High	Not Found	High	High	High	Carboxymethyl [C62]; Deamidated [R74]	0		0
High	Master Protein	A0A072URQ3	MAP kinase kinase OS=Medicago truncatula GN=MTR_4g125800 PE=3 SV=1	0	47.642	21	7	9	7	1	356	39.6	5.55	46.92	7	Not Found	Not Found	High	High	High	High	Not Found	Not Found		0		0
High	Master Protein	G7IFV1	Synaptobrevin-like protein OS=Medicago truncatula GN=MTR_2g028790 PE=3 SV=1	0	47.638	35	11	23	8	1	220	24.9	8.38	74.92	11	High	Not Found	High	High	High	High	High	High		0		0
High	Master Protein	G7K855	Plant/K24G6-12 protein OS=Medicago truncatula GN=MTR_5g027220 PE=4 SV=2	0	47.625	30	11	15	11	1	320	35.9	6.16	52.68	11	Not Found	Not Found	Medium	High	High	High	High	High		0		0
High	Master Protein	G7J8L6	50S ribosomal protein L3P OS=Medicago truncatula GN=MTR_3g118210 PE=3 SV=1	0	47.572	24	7	20	7	1	272	29.5	10.54	70.82	7	Not Found	Not Found	High	High	High	High	High	High		0		0
High	Master Protein	G7IBZ5	ABA/WDS induced protein OS=Medicago truncatula GN=MTR_1g098680 PE=4 SV=1	0	47.489	54	6	8	6	1	257	27.3	5.35	39.7	6	High	High	High	High	Not Found	High	Not Found	Not Found		0		0
High	Master Protein	G7JK09	Polyadenylate-binding protein OS=Medicago truncatula GN=MTR_4g085540 PE=3 SV=1	0	47.417	17	10	11	9	1	654	71	8.25	39.61	10	High	Not Found	Not Found	High	High	Not Found	Not Found	High		0		0
High	Master Protein	G7LCC0	26S proteasome regulatory complex component OS=Medicago truncatula GN=MTR_8g106120 PE=4 SV=1	0	47.403	8	10	15	10	1	1001	108.7	5.29	54.27	10	High	High	High	High	High	Not Found	Not Found	High		0		0
High	Master Protein	A0A072TH37	Glycoside hydrolase family 1 protein OS=Medicago truncatula GN=MTR_0110s0040 PE=3 SV=1	0	47.373	20	8	11	7	1	514	59.2	9.19	47.64	8	Not Found	Not Found	High	High	Not Found	High	High	High	Deamidated [R227]	0		0
High	Master Protein	I3SZM1	Thylakoid membrane phosphoprotein 14 kDa protein OS=Medicago truncatula GN=MTR_7g116795 PE=2 SV=1	0	47.356	27	6	44	6	1	161	17.6	9.2	166.23	6	High	High	High	High	High	High	High	High	Phospho [S59; S60; S61; T64]	4	Phospho [S59; S60; S61; T64]	0
High	Master Protein	A0A072U7U1	Glyceraldehyde-3-phosphate dehydrogenase OS=Medicago truncatula GN=MTR_6g022630 PE=3 SV=1	0	47.253	24	9	36	2	1	323	34.8	7.52	92.81	9	Not Found	Not Found	High	High	High	Not Found	Not Found	High		0		0
High	Master Protein	A0A072VN55	Viral A-type inclusion protein, putative OS=Medicago truncatula GN=MTR_1g082215 PE=4 SV=1	0	47.196	19	12	15	12	1	632	72.6	5.25	48.13	12	High	High	High	High	High	Not Found	Not Found	Not Found		0		0
High	Master Protein	A0A072USZ0	Translation elongation factor EF1B, gamma chain OS=Medicago truncatula GN=MTR_4g134770 PE=4 SV=1	0	47.192	23	8	22	2	1	419	48	6.32	68.37	8	Not Found	Not Found	Not Found	Medium	Not Found	Not Found	High	High		0		0
High	Master Protein	A0A072UGB8	ADP,ATP carrier protein OS=Medicago truncatula GN=MTR_4g011460 PE=3 SV=1	0	47.169	15	4	10	4	1	629	68.7	9.38	63.97	4	Not Found	Not Found	High	High	High	High	High	Not Found	Deamidated [R627]	0		0
High	Master Protein	G7JH60	30S ribosomal protein S3 OS=Medicago truncatula GN=rps3 PE=2 SV=1	0	47.103	28	9	21	9	1	214	24.5	9.91	76.28	9	High	High	High	High	High	High	High	High		0		0
High	Master Protein	A0A072UGQ1	Coatomer subunit beta OS=Medicago truncatula GN=MTR_4g008250 PE=4 SV=1	0	47.032	12	9	17	9	1	951	106	5.87	64.91	9	Not Found	Not Found	High	High	High	High	High	High	Deamidated [Q669]	0		0
High	Master Protein	A0A072U5I5	Eukaryotic aspartyl protease family protein OS=Medicago truncatula GN=MTR_7g117430 PE=3 SV=1	0	46.959	20	9	21	9	1	485	52.4	8.54	81.19	9	Not Found	Not Found	High	High	High	High	High	High	Deamidated [R372]	0		0
High	Master Protein	G7JW56	60S ribosomal L8-like protein OS=Medicago truncatula GN=MTR_5g021800 PE=4 SV=1	0	46.923	24	9	38	2	1	258	28	10.56	119.01	9	Not Found	Not Found	High	High	High	Not Found	Not Found	Not Found	Deamidated [R37]	0		0
High	Master Protein	G7I885	Aspartate-tRNA ligase OS=Medicago truncatula GN=MTR_1g014140 PE=4 SV=1	0	46.853	26	11	11	11	1	541	60.5	6.4	35.58	11	Not Found	Not Found	High	High	High	High	High	Not Found		0		0
High	Master Protein	A0A072VR00	D-3-phosphoglycerate dehydrogenase OS=Medicago truncatula GN=MTR_1g107480 PE=3 SV=1	0	46.833	19	11	12	11	1	597	62.9	6.34	49.67	11	High	High	High	High	High	High	High	Not Found		0		0
High	Master Protein	G7J9S5	LRR receptor-like kinase family protein OS=Medicago truncatula GN=MTR_3g094710 PE=4 SV=2	0	46.719	12	11	20	10	1	1033	113.4	6.76	49.7	11	Not Found	Not Found	High	High	High	High	High	High		0		0
High	Master Protein	I3SNP1	Uncharacterized protein OS=Medicago truncatula GN=MTR_4g109650 PE=2 SV=1	0	46.713	34	5	16	5	1	126	14.4	9.07	70	5	Not Found	Not Found	High	High	Not Found	High	High	High		0		0
High	Master Protein	G7JYQ0	RAB GTPase-like protein B1C OS=Medicago truncatula GN=MTR_5g013900 PE=4 SV=2	0	46.621	56	12	23	5	1	207	23	7.9	74.68	12	High	High	High	High	Not Found	High	High	Not Found		0		0
High	Master Protein	G7KQ56	TCP-1/cpn60 chaperonin family protein OS=Medicago truncatula GN=MTR_6g032870 PE=3 SV=2	0	46.57	17	6	13	1	1	540	58.2	5.4	55.17	6	Not Found	Not Found	Not Found	Not Found	High	Not Found	Not Found	Not Found		0		0
High	Master Protein	A0A072UGE8	Formate dehydrogenase, mitochondrial OS=Medicago truncatula GN=MTR_6g007170 PE=3 SV=1	0	46.567	21	8	13	7	1	386	42.2	6.99	35.4	8	Not Found	Not Found	High	Not Found	High	High	High	High		0		0
High	Master Protein	A0A072V4J6	Fungal proteinase A, aspartic proteinase superfamily protein OS=Medicago truncatula GN=MTR_2g023910 PE=3 SV=1	0	46.565	17	9	17	9	1	510	55	6.44	78.14	9	High	Not Found	Not Found	High	High	High	High	Not Found		0		0
High	Master Protein	G7J060	Glutathione S-transferase, amino-terminal domain protein OS=Medicago truncatula GN=MTR_3g005720 PE=4 SV=1	0	46.558	21	7	15	7	1	323	36.1	6.96	63.24	7	High	High	High	High	High	High	High	High	Deamidated [R255]	0		0
High	Master Protein	A2Q5A8	Aldo/keto reductase OS=Medicago truncatula GN=MTR_7g021680 PE=2 SV=1	0	46.519	19	8	13	7	1	339	37.4	6.14	55.98	8	Not Found	Not Found	Not Found	Not Found	High	High	High	High		0		0
High	Master Protein	A0A072UNZ7	RAB GTPase-like protein B1C OS=Medicago truncatula GN=MTR_4g098950 PE=4 SV=1	0	46.479	54	12	25	5	1	206	23	7.14	75.1	12	Not Found	Not Found	Not Found	High	High	High	High	High		0		0
High	Master Protein	G7LFK4	Vacuolar H+-ATPase subunit H, putative OS=Medicago truncatula GN=MTR_8g078370 PE=4 SV=2	0	46.404	20	11	31	11	1	486	55.3	7.24	76.96	11	Not Found	High	High	High	High	High	High	High		0		0
High	Master Protein	G7J3I9	Transmembrane protein, putative OS=Medicago truncatula GN=MTR_3g110460 PE=4 SV=2	0	46.392	7	8	13	8	1	1447	155.4	6.14	46.23	8	Not Found	High	High	High	High	High	High	High		0		0
High	Master Protein	A0A072TVM3	TCP-1/cpn60 chaperonin family protein OS=Medicago truncatula GN=MTR_7g406870 PE=3 SV=1	0	46.366	20	10	17	10	1	535	59.3	6.49	55.13	10	High	High	High	High	High	Not Found	High	High		0		0
High	Master Protein	G4W9I5	Glutamate 1-semialdehyde aminotransferase OS=Medicago truncatula GN=GSA PE=2 SV=1	0	46.335	24	8	14	8	1	468	49.7	6.57	61.74	8	Not Found	Not Found	Not Found	High	High	High	High	High		0		0
High	Master Protein	G7K556	RAP annotation release 2, NERD domain protein OS=Medicago truncatula GN=MTR_5g007360 PE=4 SV=1	0	46.326	22	8	13	8	1	322	36.1	8.18	45.59	8	High	Not Found	High	High	High	High	High	Medium		0		0
High	Master Protein	A0A072UNG5	Amine oxidase OS=Medicago truncatula GN=MTR_4g094295 PE=4 SV=1	0	46.296	26	12	19	12	1	470	51.5	7.33	62.88	12	Not Found	High	High	High	High	High	High	High		0		0
High	Master Protein	G7JDZ5	Urease accessory protein UreG OS=Medicago truncatula GN=MTR_4g096770 PE=3 SV=1	0	46.21	33	9	11	9	1	274	29.9	6.44	47.1	9	Not Found	High	Not Found	Not Found	High	High	High	Not Found		0		0
High	Master Protein	A0A072UVT1	Long chain base biosynthesis protein 1a OS=Medicago truncatula GN=MTR_3g054030 PE=4 SV=1	0	46.145	17	8	13	8	1	480	52.8	7.18	50.47	8	Not Found	Not Found	High	High	High	High	High	High		0		0
High	Master Protein	A0A072U4R3	Calcium-transporting ATPase OS=Medicago truncatula GN=MTR_8g090125 PE=3 SV=1	0	46.101	10	11	25	9	1	992	108.1	5.41	72.95	11	Not Found	Not Found	High	Not Found	High	High	High	High	Deamidated [R79]	0		0
High	Master Protein	G7JL88	Uncharacterized protein OS=Medicago truncatula GN=MTR_4g086170 PE=4 SV=1	0	46.057	26	9	27	2	1	326	35.9	8.63	82.6	9	Not Found	Not Found	Not Found	Not Found	High	Not Found	High	High		0		0
High	Master Protein	G7JGV7	Glycerol kinase-like protein OS=Medicago truncatula GN=MTR_4g009920 PE=4 SV=1	0	46.01	25	11	16	11	1	519	56.1	6.8	49.93	11	Not Found	Not Found	High	High	High	High	High	High		0		0
High	Master Protein	G7LI94	DEAD-box ATP-dependent RNA helicase OS=Medicago truncatula GN=MTR_8g018400 PE=3 SV=1	0	45.981	24	7	16	1	1	413	46.6	5.67	64.6	7	Not Found	Not Found	Not Found	Not Found	Not Found	Not Found	High	High		0		0
High	Master Protein	G7L571	UDP-glucose 6-dehydrogenase OS=Medicago truncatula GN=MTR_7g012950 PE=3 SV=1	0	45.978	26	11	17	7	1	480	52.9	5.99	52.01	11	Not Found	Not Found	High	High	High	High	High	High		0		0
High	Master Protein	A0A072V6S4	Malectin/receptor-like kinase family protein OS=Medicago truncatula GN=MTR_2g030310 PE=4 SV=1	0	45.905	12	9	14	7	1	875	96.3	6.3	48.32	9	Not Found	High	High	High	High	High	Not Found	Not Found		0		0
High	Master Protein	G7I4V0	60S ribosomal L14-like protein OS=Medicago truncatula GN=MTR_1g075720 PE=4 SV=1	0	45.87	61	15	45	4	1	133	15.3	10.39	131.17	15	High	High	Not Found	High	High	High	High	High		0		0
High	Master Protein	G7ZZV7	Calcineurin B-like protein OS=Medicago truncatula GN=MTR_4g134250 PE=4 SV=1	0	45.868	28	8	16	3	1	227	26	4.91	65.97	8	Not Found	Not Found	Not Found	Not Found	High	High	High	High	Deamidated [Q126]	0		0
High	Master Protein	G7KWG4	Receptor-like kinase plant OS=Medicago truncatula GN=MTR_7g111690 PE=4 SV=1	0	45.838	19	10	16	9	1	514	57.1	8.4	49.71	10	Not Found	High	High	High	High	Not Found	Not Found	High	Deamidated [R84]	0		0
High	Master Protein	G7L300	Violaxanthin de-epoxidase OS=Medicago truncatula GN=MTR_7g116630 PE=3 SV=2	0	45.827	18	9	13	9	1	460	52.4	5.62	47.53	9	Not Found	Not Found	High	High	High	Not Found	High	Not Found		0		0
High	Master Protein	B7FGF9	60S ribosomal protein L13a-4 OS=Medicago truncatula GN=MTR_7g057770 PE=2 SV=1	0	45.825	41	11	37	5	1	206	23.4	10.3	104.73	11	Not Found	Not Found	High	High	High	High	High	High	Carboxymethyl [C141]	0		0
High	Master Protein	G7KAK9	Long-chain fatty acyl CoA ligase OS=Medicago truncatula GN=MTR_5g009350 PE=4 SV=1	0	45.819	20	13	28	5	1	662	73.7	7.11	66.5	13	Not Found	High	High	High	High	High	High	High		0		0
High	Master Protein	Q2HU23	Mitochondrial import inner membrane translocase, subunit Tim17/22 OS=Medicago truncatula GN=MTR_2g034550 PE=4 SV=1	0	45.819	39	9	31	8	1	182	19.2	7.5	95.62	9	Not Found	Not Found	High	High	High	High	High	High		0		0
High	Master Protein	B7FMX5	NADH dehydrogenase [ubiquinone] 1 alpha subcomplex subunit 6 OS=Medicago truncatula GN=MTR_8g040150 PE=2 SV=1	0	45.79	61	11	23	11	1	133	15.2	9.5	83.61	11	High	High	High	Medium	High	High	High	High		0		0
High	Master Protein	I3S6K0	Cytochrome b559 subunit alpha OS=Medicago truncatula GN=psbE PE=2 SV=1	0	45.787	40	5	43	5	1	83	9.4	4.94	153.75	5	High	High	High	High	High	High	High	High	Deamidated [Q61]	0		0
High	Master Protein	G7JAY7	TLD-domain nucleolar protein OS=Medicago truncatula GN=MTR_3g095660 PE=4 SV=1	0	45.708	20	8	15	8	1	531	58.8	6.02	64.42	8	High	High	High	High	High	High	High	High		0		0
High	Master Protein	A0A072UDH6	ATP-dependent zinc metalloprotease FTSH protein OS=Medicago truncatula GN=MTR_7g096060 PE=3 SV=1	0	45.568	16	9	14	7	1	701	78	7.05	55.74	9	Not Found	Not Found	High	High	Not Found	High	Not Found	High		0		0
High	Master Protein	G7IVB7	50S ribosomal protein L5P OS=Medicago truncatula GN=MTR_3g007700 PE=2 SV=1	0	45.551	36	11	30	11	1	182	20.8	9.96	85.32	11	High	High	High	High	High	High	High	High		0		0
High	Master Protein	G7JEQ0	B-cell receptor-associated-like protein OS=Medicago truncatula GN=MTR_4g049540 PE=2 SV=1	0	45.546	21	6	15	6	1	221	25.1	9.01	57.62	6	Not Found	High	High	High	Not Found	High	High	Not Found		0		0
High	Master Protein	A0A072VNM9	GDP-D-mannose-3,5-epimerase OS=Medicago truncatula GN=MTR_1g080950 PE=4 SV=1	0	45.522	32	10	19	5	1	416	47.1	6.47	81.35	10	Not Found	Not Found	Not Found	High	High	High	High	High		0		0
High	Master Protein	B7FL54	60S ribosomal L14-like protein OS=Medicago truncatula GN=MTR_4g120770 PE=2 SV=1	0	45.511	61	13	36	2	1	133	15.4	10.46	109.24	13	Not Found	Not Found	Not Found	Not Found	High	High	High	Not Found		0		0
High	Master Protein	G7JI05	Glucose-1-phosphate adenylyltransferase OS=Medicago truncatula GN=MTR_4g131760 PE=3 SV=2	0	45.501	23	8	9	7	1	521	57.5	7.78	35.27	8	Not Found	Not Found	Not Found	High	High	High	High	High		0		0
High	Master Protein	G7IZC1	Plant/F13G24-250 protein OS=Medicago truncatula GN=MTR_3g026020 PE=4 SV=2	0	45.492	28	7	40	7	1	189	19.8	9.44	127.97	7	High	High	High	High	High	High	High	High	Deamidated [R62]	0		0
High	Master Protein	I3T063	Ribosomal protein L7Ae/L30e/S12e/Gadd45 family protein OS=Medicago truncatula GN=MTR_4g074260 PE=2 SV=1	0	45.433	32	10	25	4	1	259	29.5	10.18	88.09	10	Not Found	Not Found	High	High	High	High	High	High		0		0
High	Master Protein	A0A072U5L4	Sucrose synthase OS=Medicago truncatula GN=MTR_7g108930 PE=3 SV=1	0	45.384	14	9	14	8	1	809	92.2	6.1	48.58	9	High	Not Found	Not Found	High	High	Not Found	High	High		0		0
High	Master Protein	G7KAM5	Substrate carrier family protein OS=Medicago truncatula GN=MTR_5g009500 PE=3 SV=2	0	45.227	34	11	19	8	1	346	37.2	9.51	48.16	11	Not Found	Not Found	Not Found	High	High	High	High	High		0		0
High	Master Protein	G7ISZ4	Signal peptide peptidase A (SppA) 36 kDa type protein OS=Medicago truncatula GN=MTR_2g058970 PE=4 SV=1	0	45.22	9	6	15	4	1	670	74.3	9.04	61.25	6	Not Found	Not Found	High	High	High	High	High	High		0		0
High	Master Protein	A0A072VLF0	60S acidic ribosomal protein OS=Medicago truncatula GN=MTR_2g085085 PE=3 SV=1	0	45.214	41	4	13	4	1	113	11.4	4.41	82.38	4	Not Found	Not Found	Not Found	High	High	High	High	High		0		0
High	Master Protein	G7JRF5	Quinone-oxidoreductase-like protein OS=Medicago truncatula GN=MTR_4g036260 PE=4 SV=2	0	45.185	28	6	12	6	1	308	33.1	9.19	52.11	6	Not Found	Not Found	High	High	High	High	High	High		0		0
High	Master Protein	G7LCN2	Plant/T32A16-60 protein OS=Medicago truncatula GN=MTR_8g032260 PE=2 SV=1	0	45.164	45	8	16	8	1	244	27	8.57	58	8	High	Not Found	Not Found	Not Found	High	High	High	High		0		0
High	Master Protein	G7L4R0	Magnesium-protoporphyrin IX monomethyl ester cyclase OS=Medicago truncatula GN=MTR_7g088340 PE=3 SV=1	0	45.16	17	8	26	8	1	403	47.2	8.66	93.56	8	High	Not Found	High	High	High	High	High	High		0		0
High	Master Protein	A0A072VDD5	Glucan endo-1,3-beta-glucosidase-like protein OS=Medicago truncatula GN=MTR_1g010120 PE=3 SV=1	0	45.132	20	7	14	6	1	476	52.1	6.19	57.07	7	Not Found	Not Found	Not Found	Not Found	High	High	High	High		0		0
High	Master Protein	A0A072USY8	LRR receptor-like kinase OS=Medicago truncatula GN=MTR_4g020070 PE=4 SV=1	0	45.127	19	7	12	5	1	495	55.8	6.43	47.05	7	Not Found	Not Found	Not Found	High	High	High	High	Not Found		0		0
High	Master Protein	G7IL50	Methionine S-methyltransferase OS=Medicago truncatula GN=MTR_2g005110 PE=3 SV=1	0	45.107	10	9	14	9	1	1092	121	5.8	42.05	9	Not Found	Not Found	High	High	High	High	High	High	Deamidated [R958; Q960]	0		0
High	Master Protein	G7JFK4	Eukaryotic translation initiation factor iso4G OS=Medicago truncatula GN=MTR_4g130570 PE=4 SV=1	0	45.085	16	10	16	10	1	779	85.3	6.67	53.96	10	High	High	High	High	High	High	High	High		0		0
High	Master Protein	G7K0V8	Receptor-like kinase OS=Medicago truncatula GN=MTR_5g075630 PE=4 SV=1	0	45.013	14	10	17	6	1	651	71.5	8.38	59.51	10	Not Found	Not Found	High	High	Not Found	High	High	High		0		0
High	Master Protein	G7JLJ7	Glyoxysomal fatty acid beta-oxidation MFP-A protein OS=Medicago truncatula GN=MTR_4g120130 PE=4 SV=2	0	45.012	14	11	13	9	1	723	78.8	9.1	46.44	11	Not Found	High	High	High	Not Found	High	High	High		0		0
High	Master Protein	G7KFF6	Serine/Threonine kinase family protein OS=Medicago truncatula GN=MTR_5g099130 PE=3 SV=1	0	44.99	30	10	15	9	1	399	43.4	8.95	45.64	10	Not Found	Not Found	Not Found	Not Found	High	High	High	High		0		0
High	Master Protein	I3SV05	Plectin/S10 domain protein OS=Medicago truncatula GN=MTR_8g098850 PE=2 SV=1	0	44.972	38	8	22	1	1	177	19.6	9.54	80.82	8	Not Found	Not Found	Not Found	Not Found	Not Found	Not Found	Not Found	High		0		0
High	Master Protein	G7J9V5	Stromal cell-derived factor-like protein OS=Medicago truncatula GN=MTR_3g106130 PE=2 SV=1	0	44.942	30	5	12	5	1	223	24.6	7.06	68.39	5	High	Not Found	Not Found	Not Found	High	High	High	High		0		0
High	Master Protein	G7IEZ6	Chalcone-flavonone isomerase family protein OS=Medicago truncatula GN=MTR_1g115820 PE=2 SV=1	0	44.886	47	7	8	7	1	222	23.8	5.47	37.81	7	Not Found	High	Not Found	Not Found	High	High	High	High		0		0
High	Master Protein	G7K325	Synaptobrevin-like protein OS=Medicago truncatula GN=MTR_5g089370 PE=3 SV=1	0	44.764	29	7	20	5	1	219	24.9	9.32	75.13	7	Not Found	Not Found	High	High	High	High	High	High		0		0
High	Master Protein	A0A072VBJ9	Malectin/receptor-like kinase family protein OS=Medicago truncatula GN=MTR_2g080220 PE=4 SV=1	0	44.711	12	9	12	7	1	843	92.7	5.95	45.25	9	Not Found	Not Found	High	High	High	High	High	High		0		0
High	Master Protein	G7KC21	Major intrinsic protein (MIP) family transporter OS=Medicago truncatula GN=MTR_5g010150 PE=3 SV=1	0	44.705	31	7	17	4	1	287	30.8	8.81	54.36	7	High	High	Not Found	High	High	High	High	High		0		0
High	Master Protein	A0A072U3F3	LRR receptor-like Serine/Threonine-kinase RKF3, putative OS=Medicago truncatula GN=MTR_7g094100 PE=4 SV=1	0	44.676	19	12	17	9	1	669	73.8	6.95	54.81	12	Not Found	Not Found	Not Found	High	High	Not Found	Not Found	High	Carboxymethyl [C318]; Deamidated [R337]	0		0
High	Master Protein	A0A072VSV9	Ankyrin repeat plant-like protein OS=Medicago truncatula GN=MTR_1g115575 PE=4 SV=1	0	44.655	19	7	14	7	1	593	64.5	9.25	59.66	7	Not Found	High	Not Found	High	High	High	High	High		0		0
High	Master Protein	A0A072TNF1	Ribulose bisphosphate carboxylase large chain OS=Medicago truncatula GN=MTR_2176s0010 PE=4 SV=1	0	44.627	38	9	60	1	1	236	26.1	6.65	207.94	9	Not Found	High	High	Not Found	Not Found	Not Found	Not Found	Not Found	Carboxymethyl [C178; C210]	0		0
High	Master Protein	B3GN62	EIN2-like protein, nramp transporter OS=Medicago truncatula GN=Skl1 PE=2 SV=1	0	44.618	10	9	10	9	1	1309	142.2	5.9	36.99	9	Not Found	Not Found	High	High	Not Found	High	Not Found	Not Found		0		0
High	Master Protein	A0A072TD20	RAB GTPase-like protein G3A (Fragment) OS=Medicago truncatula GN=MTR_1452s0010 PE=4 SV=1	0	44.535	53	5	17	1	1	104	12.2	5.39	63.36	5	Not Found	Not Found	Not Found	Not Found	High	High	High	Not Found		0		0
High	Master Protein	A0A072UAL5	Ketose-bisphosphate aldolase class-II family protein OS=Medicago truncatula GN=MTR_6g069685 PE=4 SV=1	0	44.512	15	9	12	9	1	747	80.7	6.47	41.44	9	Not Found	High	Not Found	High	High	High	High	Not Found		0		0
High	Master Protein	G7IPF6	2-oxoacid dehydrogenase acyltransferase family protein OS=Medicago truncatula GN=MTR_2g006820 PE=2 SV=1	0	44.488	19	11	24	2	1	453	49.5	9.11	90.33	11	Not Found	Not Found	High	High	High	High	High	High		0		0
High	Master Protein	A0A072VA70	Caffeic acid O-methyltransferase OS=Medicago truncatula GN=MTR_2g072790 PE=3 SV=1	0	44.441	27	7	16	7	1	354	39.3	6.4	57.25	7	Not Found	High	High	High	High	High	High	High		0		0
High	Master Protein	G7JHJ7	Transcription factor Pur-alpha-like protein OS=Medicago truncatula GN=MTR_4g083230 PE=4 SV=1	0	44.34	38	9	12	9	1	293	32.1	5.94	44	9	Not Found	High	High	High	High	High	High	High		0		0
High	Master Protein	B7FGV3	GTP-binding nuclear protein OS=Medicago truncatula GN=MTR_3g107717 PE=2 SV=1	0	44.335	24	8	25	8	1	221	25.3	6.86	86.23	8	High	High	High	High	High	High	High	High		0		0
High	Master Protein	G7LDJ8	Cytochrome P450 family protein OS=Medicago truncatula GN=MTR_8g035760 PE=4 SV=2	0	44.322	18	8	11	8	1	512	58.8	8.85	37.75	8	High	Not Found	Not Found	High	High	High	High	Not Found		0		0
High	Master Protein	G7J6B4	Isocitrate dehydrogenase [NAD] subunit, mitochondrial OS=Medicago truncatula GN=MTR_3g101470 PE=3 SV=1	0	44.248	29	9	19	4	1	353	38.7	7.25	59.7	9	Not Found	Not Found	Not Found	Not Found	High	High	Not Found	Not Found		0		0
High	Master Protein	A0A072VM79	Serine/Threonine kinase family protein OS=Medicago truncatula GN=MTR_1g077800 PE=4 SV=1	0	44.107	14	6	8	6	1	717	79.4	6.47	39.88	6	Not Found	High	High	High	High	High	Not Found	Not Found		0		0
High	Master Protein	A0A072U8E2	S-acyltransferase OS=Medicago truncatula GN=MTR_6g033315 PE=3 SV=1	0	43.972	26	9	18	8	1	439	49.4	8.48	66.27	9	Not Found	High	High	High	High	High	High	High		0		0
High	Master Protein	I3SA92	Ribosomal protein L19 OS=Medicago truncatula GN=MTR_7g108955 PE=2 SV=1	0	43.884	40	10	35	3	1	219	25.4	11.39	111.3	10	High	Not Found	Not Found	High	High	High	High	High		0		0
High	Master Protein	A0A072V8W6	Cytochrome P450 family 709 protein OS=Medicago truncatula GN=MTR_2g072250 PE=3 SV=1	0	43.806	22	11	21	8	1	516	59.4	8.85	67.84	11	Not Found	Not Found	Not Found	High	High	High	High	High		0		0
High	Master Protein	G7LJM3	Peptidase M16 inactive domain protein OS=Medicago truncatula GN=MTR_8g101950 PE=3 SV=2	0	43.771	10	9	15	9	1	978	109.3	6.15	65.12	9	Not Found	Not Found	Not Found	Not Found	High	High	High	High		0		0
High	Master Protein	G7LGQ4	Stem 28 kDa glycoprotein OS=Medicago truncatula GN=MTR_8g014650 PE=2 SV=1	0	43.738	30	9	35	9	1	261	29.9	7.09	119.21	9	Not Found	High	High	High	High	High	High	High		0		0
High	Master Protein	Q2MJ21	Cytochrome P450 family monooxygenase OS=Medicago truncatula GN=CYP72A67 PE=2 SV=1	0	43.628	18	9	15	7	1	520	59.8	8.9	58.35	9	Not Found	High	Medium	High	High	High	High	High		0		0
High	Master Protein	G7KDX8	Methyltransferase PMT2-like protein OS=Medicago truncatula GN=MTR_5g040360 PE=4 SV=1	0	43.62	15	9	21	3	1	609	69	8.63	73.03	9	Not Found	Not Found	High	Not Found	High	Not Found	Not Found	Not Found	Deamidated [Q109]	0		0
High	Master Protein	A0A072UHK5	alpha-1,2-Mannosidase OS=Medicago truncatula GN=MTR_4g008140 PE=3 SV=1	0	43.609	16	7	12	7	1	577	65.2	6.49	42.74	7	Not Found	High	High	High	High	High	High	High		0		0
High	Master Protein	I3S066	60S acidic ribosomal protein OS=Medicago truncatula GN=MTR_1g060600 PE=2 SV=1	0	43.521	61	4	10	4	1	112	11.3	4.54	48.97	4	Not Found	Not Found	High	High	High	High	Not Found	Not Found		0		0
High	Master Protein	G7IF74	Universal stress family protein OS=Medicago truncatula GN=MTR_1g088640 PE=2 SV=1	0	43.435	28	4	9	4	1	167	17.9	8.68	42.65	4	Not Found	Not Found	High	High	Not Found	High	High	High		0		0
High	Master Protein	G8A0S6	Fructose-1,6-bisphosphatase, cytosolic-like protein OS=Medicago truncatula GN=MTR_6g035305 PE=3 SV=1	0	43.426	26	7	12	7	1	339	37	5.88	48.93	7	Not Found	High	High	High	High	High	Not Found	Not Found		0		0
High	Master Protein	G7IK85	Mg-protoporphyrin IX chelatase OS=Medicago truncatula GN=MTR_2g015390 PE=3 SV=1	0	43.425	30	11	18	11	1	422	46	5.72	55.44	11	Not Found	High	Not Found	High	High	High	High	Not Found		0		0
High	Master Protein	A0A072VPT1	Acetyltransferase component of pyruvate dehydrogenase complex OS=Medicago truncatula GN=MTR_1g091037 PE=3 SV=1	0	43.322	18	10	16	10	1	633	68.2	6.77	61.29	10	Not Found	Not Found	High	High	High	High	High	High		0		0
High	Master Protein	G7IFH1	Optic atrophy 3 protein OS=Medicago truncatula GN=MTR_2g014860 PE=4 SV=1	0	43.287	34	7	10	7	1	169	19.2	9.88	42.09	7	Not Found	High	High	High	Not Found	High	Not Found	Not Found		0		0
High	Master Protein	G7IT80	Nuclear-pore anchor-like protein OS=Medicago truncatula GN=MTR_2g063480 PE=4 SV=2	0	43.278	7	14	16	14	1	2095	235.9	5.07	49.44	14	Medium	High	High	High	High	High	Not Found	Not Found	Deamidated [Q1115]	0		0
High	Master Protein	A0A072VK75	Uncharacterized protein OS=Medicago truncatula GN=MTR_1g069005 PE=4 SV=1	0	43.264	8	9	10	9	1	1831	194.2	6.29	33.73	9	Not Found	Not Found	High	High	High	Not Found	High	High		0		0
High	Master Protein	A0A072UNY3	Receptor-like kinase OS=Medicago truncatula GN=MTR_4g088975 PE=3 SV=1	0	43.257	26	8	12	7	1	367	40.9	8.69	42.91	8	Not Found	Not Found	Not Found	High	High	High	High	Not Found		0		0
High	Master Protein	G7IJU0	Peroxidase OS=Medicago truncatula GN=MTR_2g029800 PE=3 SV=1	0	43.217	25	6	10	3	1	353	38	7.58	45.79	6	Not Found	Not Found	Not Found	High	High	High	Not Found	High		0		0
High	Master Protein	G7KFY5	LRR receptor-like kinase OS=Medicago truncatula GN=MTR_5g077430 PE=3 SV=1	0	43.154	12	10	17	8	1	945	102.8	6.65	54.47	10	Not Found	High	High	High	Not Found	High	High	High		0		0
High	Master Protein	G7K650	Vacuolar iron transporter-like protein OS=Medicago truncatula GN=MTR_5g068580 PE=4 SV=2	0	43.141	11	7	12	7	1	938	102.8	4.98	44.58	7	Not Found	Not Found	High	High	High	High	Not Found	Medium		0		0
High	Master Protein	G7KN36	Plant synaptotagmin OS=Medicago truncatula GN=MTR_6g084400 PE=4 SV=1	0	43.125	16	13	24	10	1	828	93.3	7.11	63.01	13	High	High	High	High	High	High	Medium	Medium		0		0
High	Master Protein	G7ILG7	Secretory carrier-associated membrane protein OS=Medicago truncatula GN=MTR_2g012560 PE=3 SV=1	0	43.077	27	4	13	3	1	289	32.4	8.48	63.1	4	Not Found	Not Found	Not Found	Not Found	High	High	High	High		0		0
High	Master Protein	G7KBX4	Microsomal signal peptidase 25 kDa subunit OS=Medicago truncatula GN=MTR_5g081900 PE=4 SV=2	0	43.069	30	7	17	7	1	189	21.3	8.9	65.95	7	High	Not Found	High	High	High	High	High	High		0		0
High	Master Protein	G7LIX6	Lipoxygenase OS=Medicago truncatula GN=MTR_8g018510 PE=3 SV=2	0	43.026	11	11	30	5	1	869	97.7	6.73	72.19	11	High	High	High	Not Found	Medium	High	Not Found	Not Found	Deamidated [Q796; R797]	0		0
High	Master Protein	G7LCJ4	F0F1-type ATP synthase, epsilon subunit OS=Medicago truncatula GN=MTR_8g008870 PE=3 SV=1	0	43.015	41	7	24	7	1	197	21	6.32	91.93	7	High	High	High	High	High	High	High	High		0		0
High	Master Protein	G7KC69	NAD(P)H:quinone oxidoreductase, type IV protein OS=Medicago truncatula GN=MTR_5g019620 PE=4 SV=1	0	42.987	21	5	15	5	1	252	26.8	6.34	67.74	5	High	High	High	High	High	High	High	High		0		0
High	Master Protein	A2Q1L2	M50 family peptidase OS=Medicago truncatula GN=MTR_7g086430 PE=4 SV=1	0	42.915	16	8	15	8	1	542	59.3	5.83	56.82	8	Not Found	Not Found	High	High	High	High	High	High		0		0
High	Master Protein	A0A072V2Y6	E3 ubiquitin-protein ligase UPL1-like protein OS=Medicago truncatula GN=MTR_3g099777 PE=4 SV=1	0	42.899	3	9	12	2	1	3683	406	5.34	37.87	9	Not Found	Not Found	High	Not Found	High	High	Not Found	Not Found		0		0
High	Master Protein	A0A072TLH0	5-hydroxyisourate hydrolase OS=Medicago truncatula GN=MTR_8g010550 PE=4 SV=1	0	42.809	26	6	15	6	1	339	36.9	6.95	59.53	6	Not Found	Not Found	High	High	High	High	High	High		0		0
High	Master Protein	A0A072VS97	LRR receptor-like kinase family protein OS=Medicago truncatula GN=MTR_1g040545 PE=4 SV=1	0	42.754	7	6	11	6	1	1006	110.9	6.6	46.2	6	Not Found	Not Found	Not Found	High	High	High	High	Not Found		0		0
High	Master Protein	A0A072VAD3	Late embryogenesis abundant protein OS=Medicago truncatula GN=MTR_2g087000 PE=4 SV=1	0	42.697	26	6	10	5	1	232	25.8	9.72	38.71	6	High	High	High	Not Found	Not Found	High	Not Found	High		0		0
High	Master Protein	G7LHE2	GDSL-like lipase/acylhydrolase OS=Medicago truncatula GN=MTR_8g014910 PE=4 SV=1	0	42.655	23	7	15	5	1	355	38.1	7.17	52.5	7	Not Found	High	High	High	High	High	High	High	Deamidated [Q134; Q135]	0		0
High	Master Protein	A2Q440	Harpin-induced 1 OS=Medicago truncatula GN=MTR_2g100060 PE=4 SV=1	0	42.602	14	4	12	4	1	260	28.7	10.4	50.86	4	Not Found	Not Found	High	High	High	High	High	High		0		0
High	Master Protein	G7IQY3	Receptor-like kinase OS=Medicago truncatula GN=MTR_2g075140 PE=4 SV=2	0	42.586	17	9	11	7	1	626	68.3	7.97	35.53	9	Not Found	Not Found	Not Found	Not Found	High	High	High	High		0		0
High	Master Protein	G7LIM7	Chlorophyllide A oxygenase OS=Medicago truncatula GN=MTR_8g085840 PE=4 SV=1	0	42.532	16	7	22	6	1	529	60.1	7.97	72.68	7	Not Found	Not Found	Not Found	Not Found	High	High	High	High	Deamidated [Q165]	0		0
High	Master Protein	A0A072UN88	NAD(P)H:quinone oxidoreductase, type IV protein OS=Medicago truncatula GN=MTR_4g091900 PE=3 SV=1	0	42.524	35	7	22	7	1	204	21.6	6.54	85.09	7	High	High	High	High	High	High	High	High		0		0
High	Master Protein	A0A072U8D8	Long chain base biosynthesis 2a-like protein OS=Medicago truncatula GN=MTR_6g033290 PE=3 SV=1	0	42.434	14	6	12	6	1	490	54.1	8.31	52.43	6	Not Found	High	High	High	High	High	High	High	Deamidated [R203]	0		0
High	Master Protein	G7KWP5	Glucan synthase-like protein OS=Medicago truncatula GN=MTR_7g005950 PE=4 SV=2	0	42.428	4	10	15	3	1	1958	225.7	9.01	36.31	10	Not Found	Not Found	High	Not Found	High	Not Found	Not Found	Not Found		0		0
High	Master Protein	A0A072UWP5	Calmodulin-domain kinase CDPK protein OS=Medicago truncatula GN=MTR_3g051770 PE=4 SV=1	0	42.336	15	7	8	3	1	538	60.6	6.13	36.17	7	Not Found	High	High	Not Found	Not Found	Not Found	Not Found	High		0		0
High	Master Protein	G7ITT4	Ribosomal protein OS=Medicago truncatula GN=MTR_2g086500 PE=2 SV=1	0	42.319	25	5	8	2	1	216	24.4	9.83	37.52	5	Not Found	Not Found	High	Not Found	High	High	Not Found	Not Found		0		0
High	Master Protein	G7KVH9	Transducin/WD40 repeat protein OS=Medicago truncatula GN=MTR_7g111080 PE=4 SV=2	0	42.261	9	7	8	7	1	1329	143.2	7.06	39.38	7	Not Found	Not Found	High	High	High	Not Found	High	High		0		0
High	Master Protein	G7I4G9	26S proteasome non-ATPase regulatory subunit-like protein OS=Medicago truncatula GN=MTR_1g019930 PE=4 SV=1	0	42.203	24	9	13	9	1	313	34.9	6.8	42.46	9	High	Not Found	Not Found	High	High	High	High	High		0		0
High	Master Protein	B7FGJ7	Cytoplasmic ribosomal protein S13 OS=Medicago truncatula GN=MTR_4g024550 PE=2 SV=1	0	42.124	44	9	27	2	1	151	17	10.32	80.9	9	Not Found	Not Found	Not Found	Not Found	Not Found	High	High	High		0		0
High	Master Protein	I3SSW0	Plastid lipid-associated protein OS=Medicago truncatula GN=MTR_1g054070 PE=2 SV=1	0	42.118	40	9	16	9	1	297	32.4	5.82	62.59	9	Not Found	Not Found	High	High	High	High	High	High		0		0
High	Master Protein	A0A072VJS3	Uncharacterized protein OS=Medicago truncatula GN=MTR_1g053910 PE=4 SV=1	0	42.032	32	10	14	10	1	342	36.6	9.73	47.69	10	Not Found	High	High	High	High	High	High	High		0		0
High	Master Protein	G7JJ05	Prolyl 4-hydroxylase subunit alpha-like protein OS=Medicago truncatula GN=MTR_4g118560 PE=4 SV=1	0	42.011	32	9	15	6	1	299	32.9	6.64	48.55	9	Not Found	High	High	Not Found	Not Found	Not Found	Not Found	High		0		0
High	Master Protein	I3SJF6	60S ribosomal protein L18a OS=Medicago truncatula GN=MTR_3g046320 PE=2 SV=1	0	41.962	39	8	18	1	1	178	21.4	10.27	66.91	8	Not Found	Not Found	Not Found	High	High	High	Not Found	Not Found		0		0
High	Master Protein	A0A072TTP1	Vacuolar protein sorting-associated-like protein OS=Medicago truncatula GN=MTR_0071s0030 PE=4 SV=1	0	41.938	12	8	14	8	1	850	95	6.38	53.94	8	Not Found	Not Found	High	High	High	High	High	High		0		0
High	Master Protein	B7FHQ2	Alpha-soluble NSF attachment protein OS=Medicago truncatula GN=MTR_3g072080 PE=2 SV=1	0	41.885	29	9	9	9	1	289	32.6	5.16	32.39	9	Not Found	High	High	High	High	Not Found	High	High		0		0
High	Master Protein	A0A072UKD3	Histone H2A OS=Medicago truncatula GN=MTR_4g064005 PE=3 SV=1	0	41.82	34	6	30	2	1	148	15.9	10.64	108.37	6	Not Found	Not Found	Not Found	High	Not Found	High	High	Medium		0		0
High	Master Protein	A0A072TM21	Vacuolar protein sorting-associated protein 26A OS=Medicago truncatula GN=MTR_8g015430 PE=4 SV=1	0	41.75	21	4	7	4	1	301	35.2	7.55	33.45	4	Not Found	High	High	Not Found	Not Found	High	High	High		0		0
High	Master Protein	G7INW0	Calmodulin-binding transcription activator 1 OS=Medicago truncatula GN=MTR_2g008840 PE=4 SV=2	0	41.747	10	7	8	6	1	1040	116.7	5.97	31.84	7	Not Found	High	Not Found	High	High	Not Found	High	Not Found		0		0
High	Master Protein	G7I879	Transmembrane 9 superfamily member OS=Medicago truncatula GN=MTR_1g014080 PE=3 SV=1	0	41.746	10	7	18	6	1	637	73.1	7.96	69.06	7	High	Not Found	Not Found	High	High	High	High	High		0		0
High	Master Protein	G7JFA8	Cytochrome C oxidase OS=Medicago truncatula GN=MTR_4g097800 PE=2 SV=1	0	41.725	35	4	13	4	1	103	11.6	8.21	82.55	4	Not Found	Not Found	Not Found	Not Found	High	High	High	High		0		0
High	Master Protein	G7IXL4	Heat shock 70 kDa protein OS=Medicago truncatula GN=MTR_3g051300 PE=3 SV=1	0	41.675	15	11	12	11	1	774	86.7	5.4	35.25	11	Not Found	High	High	High	Not Found	Not Found	High	High		0		0
High	Master Protein	A0A072U6W4	Feronia receptor-like kinase OS=Medicago truncatula GN=MTR_6g015805 PE=4 SV=1	0	41.663	10	8	10	6	1	900	100.2	7.24	41.22	8	Not Found	Not Found	High	Not Found	High	High	Not Found	High		0		0
High	Master Protein	A0A072V1G6	Ribulose-phosphate 3-epimerase OS=Medicago truncatula GN=MTR_4g108800 PE=4 SV=1	0	41.65	25	5	15	4	1	281	30	8.16	55.93	5	Not Found	Not Found	High	High	High	Not Found	High	High		0		0
High	Master Protein	A0A072VDW3	DS12 from 2D-PAGE of leaf protein, putative OS=Medicago truncatula GN=MTR_2g105090 PE=4 SV=1	0	41.636	23	7	16	4	1	314	34.1	5.67	63.87	7	Not Found	Not Found	Not Found	High	High	High	High	High		0		0
High	Master Protein	A0A072VBW0	General regulatory factor 2 OS=Medicago truncatula GN=MTR_2g091225 PE=3 SV=1	0	41.595	29	6	13	5	1	261	29.5	4.83	41.98	6	Not Found	High	High	High	High	Not Found	Not Found	Not Found		0		0
High	Master Protein	G7J9A2	NAD-dependent epimerase/dehydratase family protein OS=Medicago truncatula GN=MTR_3g118430 PE=4 SV=2	0	41.588	25	10	21	10	1	393	43.8	8.85	80.89	10	High	High	High	High	High	High	High	High		0		0
High	Master Protein	A0A072VSZ2	Receptor Serine/Threonine kinase OS=Medicago truncatula GN=MTR_1g117060 PE=3 SV=1	0	41.558	21	7	11	6	1	474	52.5	8.09	42.02	7	Not Found	High	Not Found	High	High	Not Found	Not Found	High		0		0
High	Master Protein	G8A093	Sulfurtransferase OS=Medicago truncatula GN=MTR_2g067080 PE=4 SV=1	0	41.528	27	8	11	8	1	381	41.9	6.86	45.37	8	High	High	High	Not Found	High	High	High	High		0		0
High	Master Protein	G7IFM9	Prolyl 4-hydroxylase subunit alpha-like protein OS=Medicago truncatula GN=MTR_2g020800 PE=4 SV=1	0	41.501	29	8	12	5	1	303	33.4	7.2	47.18	8	High	High	High	Not Found	High	High	Not Found	High		0		0
High	Master Protein	E2IXG1	Somatic embryogenesis receptor kinase 2 OS=Medicago truncatula GN=SERK2 PE=2 SV=1	0	41.489	12	8	18	4	1	619	68.5	5.73	66.19	8	Not Found	Not Found	High	High	High	Not Found	High	High	Carboxymethyl [C378]	0		0
High	Master Protein	G7J5U6	26S proteasome non-ATPase regulatory subunit 3 OS=Medicago truncatula GN=MTR_3g114480 PE=4 SV=1	0	41.423	22	8	9	8	1	490	55.7	8.57	35.63	8	Not Found	Not Found	High	High	High	High	Not Found	High	Deamidated [Q255]	0		0
High	Master Protein	G7L1R3	Pyruvate kinase OS=Medicago truncatula GN=MTR_7g100760 PE=3 SV=1	0	41.406	15	7	10	1	1	500	54.1	7.61	42.46	7	Not Found	Not Found	Not Found	High	Not Found	Not Found	Not Found	Not Found		0		0
High	Master Protein	G7ITL8	Quinone oxidoreductase OS=Medicago truncatula GN=MTR_2g081810 PE=2 SV=1	0	41.4	32	6	16	6	1	203	21.7	6.19	67.27	6	Not Found	Not Found	High	High	High	High	High	High		0		0
High	Master Protein	G7J1U2	Legume lectin beta domain protein OS=Medicago truncatula GN=MTR_3g027280 PE=3 SV=1	0	41.395	23	5	6	5	1	281	30.2	7.56	33.41	5	Not Found	Not Found	Not Found	Not Found	Not Found	High	Not Found	High		0		0
High	Master Protein	B7FGY9	Uncharacterized protein OS=Medicago truncatula GN=MTR_4g031650 PE=2 SV=1	0	41.395	49	5	12	5	1	136	15.7	6.8	38.01	5	Not Found	Not Found	Not Found	High	High	High	High	High		0		0
High	Master Protein	A0A072UM25	Argonaute protein 1A OS=Medicago truncatula GN=MTR_6g477980 PE=3 SV=1	0	41.355	8	8	13	7	1	1115	122.7	9.23	42.58	8	Not Found	Not Found	Not Found	High	High	High	High	High		0		0
High	Master Protein	A0A072TLE6	LRR receptor-like kinase OS=Medicago truncatula GN=MTR_8g010180 PE=4 SV=1	0	41.279	14	7	21	5	1	618	67.9	7.37	75.14	7	Not Found	Not Found	High	Medium	High	High	High	High		0		0
High	Master Protein	A0A072TQ67	Malate dehydrogenase OS=Medicago truncatula GN=MTR_8g463760 PE=3 SV=1	0	41.265	18	7	14	7	1	343	35.8	8.47	59.14	7	Not Found	High	High	High	High	High	High	High		0		0
High	Master Protein	B7FN63	Photosystem I reaction center subunit VI OS=Medicago truncatula GN=MTR_2g101820 PE=2 SV=1	0	41.236	36	5	45	5	1	147	15.6	9.8	133.74	5	High	High	High	High	High	High	High	High		0		0
High	Master Protein	G7IL22	30S ribosomal protein S1 OS=Medicago truncatula GN=MTR_2g033020 PE=4 SV=2	0	41.146	26	9	12	9	1	409	44.9	5.24	38.98	9	Not Found	High	High	High	High	High	High	Medium		0		0
High	Master Protein	A2Q5B6	Aldo/keto reductase OS=Medicago truncatula GN=MTR_7g021850 PE=4 SV=1	0	41.14	19	7	10	6	1	339	37.6	5.86	45.14	7	Not Found	Not Found	Not Found	Not Found	High	High	High	High		0		0
High	Master Protein	A0A072UC80	LRR receptor-like kinase plant OS=Medicago truncatula GN=MTR_6g090615 PE=4 SV=1	0	41.066	10	5	6	5	1	897	100	6.28	37.42	5	Not Found	High	High	Not Found	Not Found	High	High	High		0		0
High	Master Protein	I3SMT2	Oligosaccharide transporter OS=Medicago truncatula GN=MTR_1g105470 PE=2 SV=1	0	41.065	21	5	15	5	1	343	38.6	9.22	52.19	5	Not Found	Not Found	High	High	High	Medium	High	High		0		0
High	Master Protein	G7LBC4	Uncharacterized protein OS=Medicago truncatula GN=MTR_8g092100 PE=4 SV=2	0	41.051	4	11	14	11	1	3167	354.2	5.59	41.19	11	Not Found	Not Found	High	High	High	High	High	High		0		0
High	Master Protein	S4SZP2	Ribosomal protein S12 OS=Medicago truncatula GN=rps12 PE=3 SV=1	0	41.029	45	5	20	1	1	123	13.7	11.58	74.57	5	Not Found	Not Found	High	High	High	High	High	High		0		0
High	Master Protein	A0A072UJS6	Shoot gravitropism 2 (SGR2) protein OS=Medicago truncatula GN=MTR_4g033490 PE=4 SV=1	0	41.004	11	8	11	8	1	929	105.6	5.81	45.02	8	Not Found	Not Found	High	High	High	High	High	High		0		0
High	Master Protein	Q8GSL6	Farnesyl-diphosphate farnesyltransferase OS=Medicago truncatula GN=sqs1 PE=2 SV=1	0	40.997	17	7	15	7	1	413	47	7.64	47.73	7	Not Found	High	High	High	High	High	High	High		0		0
High	Master Protein	B7FK31	UDP-D-glucose/UDP-D-galactose 4-epimerase OS=Medicago truncatula GN=MTR_8g096880 PE=2 SV=1	0	40.905	23	7	13	7	1	350	38.7	8.03	47.47	7	Not Found	High	High	Not Found	High	High	Not Found	High		0		0
High	Master Protein	A0A072TP47	Methyltransferase OS=Medicago truncatula GN=MTR_8g432680 PE=4 SV=1	0	40.838	16	10	15	7	1	638	73.2	8.43	52.48	10	Not Found	High	Not Found	High	High	Not Found	High	High		0		0
High	Master Protein	A0A072VAY5	Adaptor protein complex AP-2, alpha subunit OS=Medicago truncatula GN=MTR_2g084610 PE=4 SV=1	0	40.82	8	8	9	8	1	1026	114.4	6.3	35	8	High	High	Not Found	Not Found	High	High	High	Medium		0		0
High	Master Protein	A2Q669	Desiccation PCC13-like protein OS=Medicago truncatula GN=MTR_2g033550 PE=4 SV=1	0	40.802	30	7	9	7	1	297	32.1	6.55	34.11	7	Not Found	High	Not Found	High	High	High	High	Not Found		0		0
High	Master Protein	G7LFP1	NADH dehydrogenase OS=Medicago truncatula GN=MTR_8g094730 PE=4 SV=2	0	40.769	17	8	12	7	1	538	58.8	7.87	48.08	8	High	Not Found	Not Found	Not Found	High	High	High	High		0		0
High	Master Protein	A2Q6E4	Protein phosphatase 2C-like OS=Medicago truncatula GN=MTR_5g063940 PE=4 SV=1	0	40.741	36	8	18	7	1	282	30.7	8.15	61.47	8	Not Found	High	High	High	High	High	High	High	Deamidated [Q194]	0		0
High	Master Protein	G7I9M5	Substrate carrier family protein OS=Medicago truncatula GN=MTR_1g095780 PE=3 SV=1	0	40.709	12	7	7	7	1	796	87.6	8.48	27.5	7	Not Found	Not Found	High	Not Found	High	Not Found	High	High		0		0
High	Master Protein	G7ID53	Embryo-specific protein OS=Medicago truncatula GN=MTR_1g102420 PE=4 SV=1	0	40.703	22	2	7	2	1	189	21	5.44	37.48	2	Not Found	Not Found	Not Found	Not Found	Not Found	High	High	High	Deamidated [R152]	0		0
High	Master Protein	G7JBZ8	Import receptor subunit TOM20 OS=Medicago truncatula GN=MTR_3g085410 PE=2 SV=1	0	40.644	44	7	18	7	1	203	22.5	5.2	60.98	7	Not Found	High	High	High	High	High	High	High	Deamidated [R124; Q147]	0		0
High	Master Protein	A0A072TXT5	Transmembrane protein, putative OS=Medicago truncatula GN=MTR_8g016210 PE=4 SV=1	0	40.633	38	6	21	3	1	183	20.4	9.64	84.77	6	Not Found	High	Not Found	Not Found	High	High	High	Not Found	Deamidated [R131]	0		0
High	Master Protein	A0A072UQA9	Beta-xylosidase/alpha-L-arabinofuranosidase-like protein OS=Medicago truncatula GN=MTR_4g094285 PE=4 SV=1	0	40.576	13	9	18	6	1	774	83.5	8.27	55.37	9	High	High	High	High	High	High	Not Found	Not Found		0		0
High	Master Protein	A0A072VAN1	Transmembrane protein, putative OS=Medicago truncatula GN=MTR_2g078540 PE=4 SV=1	0	40.534	25	6	11	6	1	271	29.4	7.59	41.66	6	High	High	High	Not Found	High	Not Found	Not Found	Not Found		0		0
High	Master Protein	G7LFW2	VHS domain plant protein OS=Medicago truncatula GN=MTR_8g013720 PE=4 SV=1	0	40.522	15	7	7	7	1	709	77.4	5.97	27.24	7	Not Found	Not Found	High	High	Not Found	High	High	High		0		0
High	Master Protein	B7FJV5	Transmembrane protein, putative OS=Medicago truncatula GN=MTR_6g029250 PE=2 SV=1	0	40.488	32	8	15	8	1	228	26	4.88	56.59	8	Not Found	Not Found	High	High	High	Not Found	High	High		0		0
High	Master Protein	A0A072U3V6	Pectinesterase OS=Medicago truncatula GN=MTR_7g108905 PE=4 SV=1	0	40.43	16	7	9	7	1	557	61	8.91	35.34	7	Not Found	Not Found	High	High	High	Not Found	High	High		0		0
High	Master Protein	B7FHY0	Ribosomal protein L10 family protein OS=Medicago truncatula GN=MTR_4g131540 PE=2 SV=1	0	40.386	28	8	14	8	1	234	26.5	9.1	53.07	8	Not Found	Not Found	High	High	High	High	High	High		0		0
High	Master Protein	G7KPU0	Elongation factor Ts, mitochondrial OS=Medicago truncatula GN=EFTS PE=3 SV=1	0	40.291	10	9	12	9	1	1054	114.5	4.84	37.99	9	Not Found	High	High	High	High	High	High	High		0		0
High	Master Protein	G7IIL4	Nucleosome assembly protein OS=Medicago truncatula GN=MTR_2g039680 PE=3 SV=1	0	40.273	18	6	11	6	1	368	41.8	4.4	45.66	6	High	High	High	Not Found	High	High	High	High	Deamidated [Q88]	0		0
High	Master Protein	I3SJY8	Ribosomal protein S8 OS=Medicago truncatula GN=MTR_1g105415 PE=2 SV=1	0	40.201	62	8	16	8	1	130	14.8	9.89	53.77	8	High	High	High	High	High	High	High	High	Deamidated [R68]	0		0
High	Master Protein	G7KUJ1	S-adenosylmethionine synthase OS=Medicago truncatula GN=MTR_7g110310 PE=3 SV=1	0	40.099	23	7	11	2	1	394	43.3	5.94	41.63	7	Not Found	Not Found	Not Found	High	Not Found	High	Not Found	Not Found		0		0
High	Master Protein	G7K804	Patatin OS=Medicago truncatula GN=MTR_5g017670 PE=3 SV=1	0	40.029	24	9	14	9	1	399	43.9	6.42	55.6	9	Not Found	Not Found	High	High	High	Not Found	High	High		0		0
High	Master Protein	G7IXS6	Calcineurin B-like protein OS=Medicago truncatula GN=MTR_3g060730 PE=4 SV=2	0	40.029	31	9	13	4	1	226	25.9	4.83	51.67	9	Not Found	Not Found	High	Not Found	High	Not Found	High	High		0		0
High	Master Protein	A0A072VPV0	Vps51/Vps67 protein OS=Medicago truncatula GN=MTR_1g492710 PE=3 SV=1	0	39.997	5	9	28	1	1	1094	123.3	8.15	85.68	9	Not Found	Not Found	Not Found	High	Not Found	Not Found	Not Found	Not Found		0		0
High	Master Protein	A0A072UTY2	Transmembrane protein, putative OS=Medicago truncatula GN=MTR_4g033475 PE=4 SV=1	0	39.934	38	14	26	14	1	245	28.2	9.88	64.87	14	Not Found	High	High	High	High	High	High	High		0		0
High	Master Protein	G7K0S3	30S ribosomal protein S9P OS=Medicago truncatula GN=MTR_5g075240 PE=3 SV=1	0	39.924	52	11	34	6	1	140	16.1	10.2	86.08	11	Not Found	Not Found	Not Found	High	High	High	High	High	Carboxymethyl [C31]	0		0
High	Master Protein	G7IWH9	Clustered mitochondria protein homolog OS=Medicago truncatula GN=MTR_3g027610 PE=3 SV=2	0	39.92	9	10	12	10	1	1448	157.4	6.23	41.96	10	Not Found	High	High	Not Found	Not Found	High	High	Not Found		0		0
High	Master Protein	G7J6C8	Inner membrane import protein Tic22, putative OS=Medicago truncatula GN=MTR_3g101630 PE=4 SV=1	0	39.857	50	10	18	10	1	252	28.3	9.22	49.9	10	High	High	High	High	High	High	High	High		0		0
High	Master Protein	G7LH57	Serine hydroxymethyltransferase OS=Medicago truncatula GN=MTR_8g081510 PE=2 SV=1	0	39.83	21	7	13	2	1	471	51.8	7.71	56.61	7	Not Found	Not Found	Not Found	Not Found	High	Medium	Not Found	Not Found		0		0
High	Master Protein	G7JTE4	Aldo/keto reductase family oxidoreductase OS=Medicago truncatula GN=MTR_4g021350 PE=2 SV=1	0	39.82	36	11	13	11	1	313	34.7	6.55	45.26	11	High	High	Not Found	High	High	Not Found	High	High		0		0
High	Master Protein	G7JB78	Nuclear pore complex-like protein OS=Medicago truncatula GN=MTR_3g070390 PE=4 SV=2	0	39.778	10	5	6	5	1	806	89.8	6.74	29.5	5	High	Not Found	Not Found	Not Found	High	Not Found	Not Found	High		0		0
High	Master Protein	A0A072UG57	Coiled-coil vesicle tethering-like protein, putative OS=Medicago truncatula GN=MTR_6g004510 PE=4 SV=1	0	39.75	10	6	9	6	1	942	104.8	4.93	39.2	6	Not Found	High	High	High	High	Not Found	High	High		0		0
High	Master Protein	I3S100	NADH-ubiquinone oxidoreductase B16.6 subunit OS=Medicago truncatula GN=MTR_1g046380 PE=2 SV=1	0	39.735	45	7	18	7	1	143	16.2	9.23	78.69	7	Not Found	Not Found	High	High	High	High	High	High		0		0
High	Master Protein	G7JGC9	Nodulin-like protein OS=Medicago truncatula GN=MTR_4g082860 PE=2 SV=1	0	39.652	77	7	17	5	1	125	12.7	4.91	64.25	7	Not Found	Not Found	High	High	High	High	High	High		0		0
High	Master Protein	A0A072VQV0	NADH-ubiquinone oxidoreductase B18 subunit, putative OS=Medicago truncatula GN=MTR_1g112480 PE=4 SV=1	0	39.576	54	6	16	6	1	105	12.2	7.21	76.03	6	Not Found	High	High	High	High	High	High	High		0		0
High	Master Protein	G7LE42	Methyltransferase PMT26-like protein, putative OS=Medicago truncatula GN=MTR_8g093880 PE=4 SV=1	0	39.552	10	7	10	4	1	826	93.1	5.8	37.65	7	Not Found	High	Not Found	Not Found	High	Not Found	High	High		0		0
High	Master Protein	G7J3M7	30S ribosomal protein S13 OS=Medicago truncatula GN=MTR_3g073140 PE=2 SV=1	0	39.483	40	7	11	7	1	166	18.9	10.43	45.54	7	Not Found	Not Found	High	High	High	Not Found	High	High		0		0
High	Master Protein	A0A072UHR3	Elongation factor 1-beta OS=Medicago truncatula GN=MTR_4g019610 PE=3 SV=1	0	39.446	33	7	16	2	1	268	29.4	4.67	59.14	7	Not Found	Not Found	High	High	High	Not Found	Not Found	Not Found		0		0
High	Master Protein	I3SPW7	RAB GTPase-like protein A1D OS=Medicago truncatula GN=MTR_4g088090 PE=2 SV=1	0	39.438	40	10	22	2	1	217	24.1	5.69	65.7	10	Not Found	Not Found	High	Not Found	Not Found	Not Found	Not Found	Not Found		0		0
High	Master Protein	G7J7S2	FMP32-like protein OS=Medicago truncatula GN=MTR_3g117390 PE=4 SV=1	0	39.429	32	8	17	5	1	226	25.5	8	63.52	8	Not Found	High	High	Not Found	High	High	Not Found	High		0		0
High	Master Protein	G7KAU2	PQ-loop protein/transmembrane family protein OS=Medicago truncatula GN=MTR_5g019120 PE=4 SV=1	0	39.411	19	8	19	8	1	380	43	8.82	60.67	8	Not Found	Not Found	High	High	High	High	High	High		0		0
High	Master Protein	G7L7M3	Inter-alpha-trypsin inhibitor heavy chain-like protein OS=Medicago truncatula GN=MTR_8g021230 PE=4 SV=2	0	39.251	13	9	12	9	1	753	83.4	6.09	36.65	9	High	Not Found	High	High	High	High	High	High	Phospho [T645; S647]	2	Phospho [T645; S647]	0
High	Master Protein	G7J632	Lipoxygenase OS=Medicago truncatula GN=MTR_3g079450 PE=3 SV=2	0	39.138	12	9	11	6	1	902	103.2	6.51	44.34	9	Not Found	Not Found	High	High	High	High	Not Found	Not Found		0		0
High	Master Protein	G7IKV9	Obg-like ATPase 1 OS=Medicago truncatula GN=MTR_2g030370 PE=3 SV=1	0	39.103	21	7	12	6	1	394	44.3	6.99	39.47	7	Not Found	Not Found	High	High	Not Found	High	High	High		0		0
High	Master Protein	G7IFI3	Transmembrane protein, putative OS=Medicago truncatula GN=MTR_2g014970 PE=4 SV=1	0	39.058	30	3	15	3	1	113	12.5	9.57	78.44	3	Not Found	Not Found	High	High	High	High	High	High		0		0
High	Master Protein	A0A072TSV7	LRR and NB-ARC domain disease resistance protein OS=Medicago truncatula GN=MTR_8g479430 PE=3 SV=1	0	39.049	12	8	11	7	1	813	92.3	5.95	39.04	8	Not Found	Not Found	High	Medium	Not Found	High	High	High		0		0
High	Master Protein	A0A072UQW2	31 kDa ribonucleoprotein OS=Medicago truncatula GN=MTR_4g104470 PE=4 SV=1	0	39.042	27	7	21	7	1	300	33.5	5.05	78.59	7	Not Found	High	High	High	High	High	High	High		0		0
High	Master Protein	I3S111	RAB GTPase-like protein A1D OS=Medicago truncatula GN=MTR_4g064897 PE=2 SV=1	0	38.986	47	10	27	5	1	215	23.7	6.68	80.41	10	High	High	High	High	High	High	High	High		0		0
High	Master Protein	G7J8F5	Ferredoxin-like protein OS=Medicago truncatula GN=MTR_3g105080 PE=4 SV=1	0	38.972	11	3	13	3	1	229	24.2	7.58	55.39	3	Not Found	Not Found	Not Found	High	Not Found	High	High	High		0		0
High	Master Protein	B7FGK4	Plastocyanin-like domain protein OS=Medicago truncatula GN=MTR_8g007035 PE=2 SV=1	0	38.969	19	3	33	2	1	199	20.6	7.24	141.61	3	High	High	High	High	High	High	High	High	Deamidated [Q62]; Phospho [S59; S60]	2	Phospho [S59; S60]	0
High	Master Protein	G7LBQ7	Glycerol-3-phosphate acyltransferase OS=Medicago truncatula GN=MTR_8g030620 PE=4 SV=1	0	38.894	18	9	16	9	1	505	56	9.31	50.82	9	High	Not Found	High	High	High	High	High	High		0		0
High	Master Protein	G7K2N4	Lectin receptor kinase OS=Medicago truncatula GN=MTR_5g025020 PE=4 SV=2	0	38.829	11	7	21	6	1	698	77.7	6.65	53.94	7	Not Found	Not Found	High	High	High	High	High	High		0		0
High	Master Protein	G7JQS3	Secretory carrier-associated membrane protein OS=Medicago truncatula GN=MTR_4g090510 PE=3 SV=2	0	38.781	27	4	9	3	1	311	34.9	8.19	48.18	4	High	High	Not Found	High	High	High	High	High		0		0
High	Master Protein	G7KX96	Alpha-mannosidase OS=Medicago truncatula GN=MTR_7g084040 PE=3 SV=1	0	38.763	9	6	14	3	1	1022	115.2	6	52.72	6	Not Found	Not Found	Not Found	Not Found	Not Found	High	High	High	Deamidated [Q801; R808; R809]	0		0
High	Master Protein	A0A072TM71	Heterogeneous nuclear ribonucleoprotein OS=Medicago truncatula GN=MTR_8g007390 PE=4 SV=1	0	38.705	17	12	14	12	1	800	88.9	5.21	45.35	12	High	High	High	High	High	High	Not Found	High		0		0
High	Master Protein	I3T9M0	60S ribosomal protein L35a-3 OS=Medicago truncatula GN=MTR_0699s0020 PE=2 SV=1	0	38.704	56	8	29	2	1	112	12.8	10.61	103.45	8	High	High	Not Found	Not Found	High	High	High	High	Deamidated [R78]	0		0
High	Master Protein	I3SBH6	Glutathione peroxidase OS=Medicago truncatula GN=MTR_7g094600 PE=2 SV=1	0	38.704	30	7	22	7	1	170	19.2	9.1	75.85	7	Not Found	Not Found	High	High	High	High	High	High	Deamidated [R106]	0		0
High	Master Protein	G7J7T5	NADH ubiquinone oxidoreductase B22-like subunit OS=Medicago truncatula GN=MTR_3g117550 PE=2 SV=1	0	38.675	44	5	9	5	1	117	13.7	8.43	43.88	5	Not Found	Not Found	High	High	High	High	High	High		0		0
High	Master Protein	G7KQL6	Transmembrane protein, putative OS=Medicago truncatula GN=MTR_7g079510 PE=4 SV=1	0	38.663	11	5	9	5	1	613	68.8	8.43	40	5	Not Found	Not Found	Not Found	High	High	High	High	High		0		0
High	Master Protein	D7RIC7	Alpha-L-arabinofuranosidase OS=Medicago truncatula GN=Araf1 PE=2 SV=1	0	38.663	18	10	18	10	1	672	74	5.52	49.81	10	Not Found	High	High	Not Found	High	High	High	High		0		0
High	Master Protein	A0A072TWB2	RAB GTPase-like protein A1D OS=Medicago truncatula GN=MTR_7g405790 PE=4 SV=1	0	38.66	34	8	22	3	1	220	24.4	5.22	80.61	8	Not Found	Not Found	Not Found	High	High	High	High	High		0		0
High	Master Protein	G7JEG6	Low PSII accumulation protein OS=Medicago truncatula GN=MTR_4g007190 PE=4 SV=2	0	38.547	25	7	9	7	1	379	42.5	5.54	41.12	7	Not Found	High	Not Found	High	Not Found	High	High	High	Deamidated [R187]	0		0
High	Master Protein	G7JAE8	SPFH/band 7/PHB domain membrane-associated family protein OS=Medicago truncatula GN=MTR_3g106470 PE=4 SV=2	0	38.541	18	8	9	1	1	453	50.1	6	37.28	8	High	Not Found	Not Found	Not Found	Not Found	Not Found	Not Found	Not Found		0		0
High	Master Protein	G7JKF9	Heat shock protein 70 (HSP70)-interacting protein, putative OS=Medicago truncatula GN=MTR_4g132780 PE=4 SV=2	0	38.527	14	7	8	7	1	769	85.4	5.38	34.22	7	High	High	High	High	High	High	Not Found	High	Carboxymethyl [C195]	0		0
High	Master Protein	G7JLB5	Cytoplasmic ribosomal protein S13 OS=Medicago truncatula GN=MTR_4g102170 PE=2 SV=1	0	38.513	44	8	24	1	1	151	17	10.32	72.16	8	Not Found	Not Found	Not Found	Not Found	Medium	Not Found	Not Found	Not Found		0		0
High	Master Protein	G7IVT9	Uncharacterized protein OS=Medicago truncatula GN=MTR_3g013460 PE=4 SV=1	0	38.489	36	6	15	6	1	269	28.4	4.58	57.89	6	High	Not Found	Not Found	High	High	High	High	High		0		0
High	Master Protein	G7IQ96	HSPA4 nucleotide-binding domain protein OS=Medicago truncatula GN=MTR_2g040220 PE=3 SV=1	0	38.448	3	8	18	1	1	1558	174.9	5.95	63.79	8	Not Found	Not Found	Not Found	Not Found	Not Found	Not Found	High	Not Found		0		0
High	Master Protein	A0A072VJM3	Thioredoxin reductase OS=Medicago truncatula GN=MTR_1g053160 PE=3 SV=1	0	38.404	16	6	8	6	1	514	56.2	7.25	32.43	6	High	High	Not Found	High	High	High	Not Found	Not Found		0		0
High	Master Protein	G7J9Z8	2-nitropropane dioxygenase-like protein OS=Medicago truncatula GN=MTR_3g069190 PE=4 SV=1	0	38.29	28	6	6	6	1	330	35.6	5.96	28.6	6	Not Found	Not Found	High	High	Not Found	High	Not Found	High		0		0
High	Master Protein	B7FLU4	NOP56-like pre RNA processing ribonucleoprotein OS=Medicago truncatula GN=MTR_4g103790 PE=2 SV=1	0	38.243	13	5	8	5	1	524	58.6	8.66	34.5	5	Not Found	Not Found	High	High	High	Not Found	High	High		0		0
High	Master Protein	G7JHK7	Pyruvate kinase OS=Medicago truncatula GN=MTR_4g083330 PE=3 SV=1	0	38.23	14	7	10	1	1	473	51	7.64	40.04	7	Not Found	Not Found	Not Found	Not Found	Not Found	Not Found	Not Found	High		0		0
High	Master Protein	B7FGM0	Type II peroxiredoxin OS=Medicago truncatula GN=MTR_2g022660 PE=2 SV=1	0	38.201	47	7	12	7	1	199	21.5	8.35	44.13	7	High	High	High	High	High	High	High	High		0		0
High	Master Protein	G7KKY6	Pro-resilin, putative OS=Medicago truncatula GN=MTR_6g012780 PE=4 SV=1	0	38.164	19	5	5	5	1	411	45.4	4.93	28.96	5	Not Found	High	High	Not Found	Not Found	Not Found	Not Found	Not Found		0		0
High	Master Protein	G7J9D5	RNA recognition motif OS=Medicago truncatula GN=MTR_3g065490 PE=4 SV=1	0	38.153	29	10	24	10	1	291	31.1	11.37	69.37	10	Not Found	Not Found	High	High	High	High	High	High		0		0
High	Master Protein	G7JDV5	Protein disulfide-isomerase 5-3 OS=Medicago truncatula GN=MTR_4g080800 PE=4 SV=1	0	38.109	13	5	7	5	1	477	53.4	8	35.76	5	Not Found	Not Found	Not Found	High	Not Found	High	High	High		0		0
High	Master Protein	A0A072U3B3	Harpin-induced-like protein OS=Medicago truncatula GN=MTR_7g105870 PE=4 SV=1	0	38.057	28	6	11	6	1	228	25.8	9.33	52.11	6	Not Found	Not Found	Not Found	High	High	High	High	High		0		0
High	Master Protein	G7IPX6	DUF642 family protein OS=Medicago truncatula GN=MTR_2g019600 PE=4 SV=1	0	38.05	15	7	15	7	1	393	43.1	5.06	46.02	7	Not Found	High	High	High	High	High	High	High		0		0
High	Master Protein	G7K2Q8	Threonyl-tRNA synthetase/threonine-tRNA ligase, putative OS=Medicago truncatula GN=MTR_5g034820 PE=3 SV=1	0	38.032	17	9	10	9	1	711	82	7.02	38.62	9	Not Found	High	Medium	High	High	High	Not Found	High		0		0
High	Master Protein	A0A072U605	Kinesin light chain OS=Medicago truncatula GN=MTR_8g099745 PE=4 SV=1	0	38.031	16	7	12	7	1	588	64.5	5.47	49.1	7	Not Found	High	High	High	High	High	Not Found	Not Found		0		0
High	Master Protein	G7LIT9	Mg-protoporphyrin IX methyltransferase OS=Medicago truncatula GN=MTR_8g100120 PE=4 SV=1	0	38.009	21	8	15	8	1	324	35.1	6.7	40.53	8	High	High	High	High	High	Not Found	Not Found	Not Found		0		0
High	Master Protein	G7KW49	Esterase/lipase/thioesterase family protein OS=Medicago truncatula GN=MTR_7g083130 PE=4 SV=1	0	38.004	16	8	12	8	1	671	75	7.55	50.52	8	Not Found	Not Found	Not Found	High	High	High	High	High		0		0
High	Master Protein	A0A072TW69	SEC8 exocyst complex component specific domain protein OS=Medicago truncatula GN=MTR_8g104855 PE=4 SV=1	0	37.996	9	7	8	4	1	1074	119.3	5.62	32.86	7	Not Found	Not Found	Not Found	High	Not Found	High	Not Found	Not Found		0		0
High	Master Protein	A0A072UP92	Cadmium/zinc-transporting ATPase, putative OS=Medicago truncatula GN=MTR_4g094985 PE=3 SV=1	0	37.988	13	7	12	7	1	818	88.6	8.16	53.11	7	Not Found	Not Found	Not Found	High	High	High	High	High		0		0
High	Master Protein	G7KQ87	SURF1-like protein OS=Medicago truncatula GN=MTR_6g069850 PE=3 SV=1	0	37.945	26	7	15	6	1	333	37.2	7.85	64.25	7	Not Found	Not Found	Not Found	High	High	High	High	High		0		0
High	Master Protein	G7I2P6	Uncharacterized protein OS=Medicago truncatula GN=MTR_1g073190 PE=4 SV=2	0	37.941	45	3	12	3	1	120	13.1	7.24	56.98	3	Not Found	Not Found	High	High	High	High	High	High		0		0
High	Master Protein	G7KX12	Glycoside hydrolase family 1 protein OS=Medicago truncatula GN=MTR_7g051610 PE=3 SV=1	0	37.924	15	4	6	4	1	537	61	7.3	35.49	4	Not Found	Not Found	High	Not Found	High	High	High	High		0		0
High	Master Protein	G7LEP9	Pyruvate dehydrogenase E1 component subunit alpha OS=Medicago truncatula GN=MTR_8g062670 PE=4 SV=1	0	37.886	30	9	16	5	1	395	43.5	7.68	50.64	9	High	Not Found	Medium	High	High	High	High	High	Phospho [S298]	1	Phospho [S298]	0
High	Master Protein	A0A072VQM5	Cysteine-rich receptor-kinase-like protein OS=Medicago truncatula GN=MTR_1g105710 PE=4 SV=1	0	37.831	10	5	8	3	1	681	76.5	5.74	32.38	5	Not Found	High	High	High	High	Not Found	Not Found	High		0		0
High	Master Protein	G7L0K9	Eukaryotic translation initiation factor 3 subunit A OS=Medicago truncatula GN=MTR_7g099920 PE=3 SV=1	0	37.799	9	10	13	9	1	959	111.7	9.26	41.45	10	Not Found	High	High	High	High	Not Found	High	High		0		0
High	Master Protein	G7LBF8	Glutathione peroxidase OS=Medicago truncatula GN=MTR_8g105630 PE=3 SV=2	0	37.755	43	10	24	6	1	167	19	8.19	59.04	10	Not Found	High	High	High	High	High	High	High		0		0
High	Master Protein	G7JBC0	Protein transporter Sec23-like protein OS=Medicago truncatula GN=MTR_3g084740 PE=4 SV=1	0	37.715	12	5	6	4	1	771	84.9	6.15	30.57	5	Not Found	Not Found	Not Found	Not Found	Not Found	High	High	High		0		0
High	Master Protein	G7K8S5	N-acyl-L-amino-acid amidohydrolase OS=Medicago truncatula GN=MTR_5g058430 PE=4 SV=1	0	37.715	25	8	13	8	1	355	39.2	5.8	46.64	8	Not Found	Not Found	High	High	High	High	High	High		0		0
High	Master Protein	A0A072VP40	Pyruvate kinase OS=Medicago truncatula GN=MTR_1g091040 PE=3 SV=1	0	37.705	20	7	9	5	1	526	58	7.72	39.04	7	Not Found	High	Not Found	Not Found	Not Found	High	High	Not Found		0		0
High	Master Protein	G7IH71	Phosphoenolpyruvate carboxylase OS=Medicago truncatula GN=MTR_2g076670 PE=3 SV=1	0	37.681	11	8	11	4	1	966	110.8	6.24	35.87	8	Not Found	Not Found	High	High	Not Found	Not Found	High	Not Found		0		0
High	Master Protein	A0A072VBT8	Electron transfer flavoprotein-ubiquinone oxidoreductase, mitochondrial OS=Medicago truncatula GN=MTR_2g099040 PE=3 SV=1	0	37.657	19	6	13	1	1	388	43.4	8.03	55.23	6	Not Found	High	High	High	High	High	High	Not Found		0		0
High	Master Protein	A0A072VFN2	Multi-copper oxidase-like protein OS=Medicago truncatula GN=MTR_1g026410 PE=4 SV=1	0	37.654	17	7	8	6	1	543	60.5	8.7	29.86	7	Not Found	Not Found	Not Found	Not Found	High	High	Not Found	High		0		0
High	Master Protein	A0A072VIE1	Transmembrane protein, putative OS=Medicago truncatula GN=MTR_2g450550 PE=4 SV=1	0	37.648	9	5	20	5	1	528	58.9	6.52	73.04	5	Not Found	Not Found	High	High	High	High	High	High	Deamidated [Q215]	0		0
High	Master Protein	G7J7V4	Cysteine-rich RLK (Receptor-like kinase) protein OS=Medicago truncatula GN=MTR_3g064080 PE=4 SV=2	0	37.641	14	7	15	5	1	644	70.4	8.28	47.78	7	Not Found	High	High	High	Not Found	Not Found	Not Found	High		0		0
High	Master Protein	A0A072UET3	60S ribosomal protein L35a-3 OS=Medicago truncatula GN=MTR_5g081705 PE=4 SV=1	0	37.633	41	7	28	1	1	137	15.8	10.64	95.84	7	High	Not Found	Not Found	Not Found	Medium	Medium	High	High	Deamidated [R103]	0		0
High	Master Protein	G7K9A7	Cytochrome P450 family 97 protein OS=Medicago truncatula GN=MTR_5g009110 PE=3 SV=1	0	37.63	17	8	12	8	1	574	64.4	6.81	45.23	8	Not Found	Not Found	High	High	High	High	High	High		0		0
High	Master Protein	A2Q6H0	Thylakoid lumenal 29.8 kDa protein OS=Medicago truncatula GN=MTR_7g088880 PE=4 SV=1	0	37.627	29	5	8	5	1	259	28.4	8.63	35.45	5	Not Found	Not Found	High	Not Found	Not Found	High	High	High		0		0
High	Master Protein	B7FIL1	Transmembrane protein, putative OS=Medicago truncatula GN=MTR_1g017220 PE=2 SV=1	0	37.579	26	7	11	7	1	252	28.1	9.28	32.2	7	Not Found	Not Found	Not Found	Not Found	High	High	High	High		0		0
High	Master Protein	G7JIM1	Histone H2A OS=Medicago truncatula GN=MTR_4g071150 PE=3 SV=1	0	37.575	33	6	18	2	1	152	16.1	10.84	71.7	6	Not Found	Not Found	Not Found	High	High	Not Found	Medium	High		0		0
High	Master Protein	A0A072V8Q4	S-adenosylmethionine synthase OS=Medicago truncatula GN=MTR_2g046710 PE=3 SV=1	0	37.55	22	8	13	3	1	396	43.1	6.18	39.1	8	Not Found	Not Found	Not Found	High	High	Not Found	Not Found	High		0		0
High	Master Protein	G7IU50	V-type proton ATPase subunit a OS=Medicago truncatula GN=MTR_2g093210 PE=3 SV=2	0	37.47	10	6	9	5	1	818	93.6	6.34	37.7	6	Not Found	Not Found	Not Found	High	High	High	High	High		0		0
High	Master Protein	G7J8C0	Puromycin-sensitive aminopeptidase-like protein OS=Medicago truncatula GN=MTR_3g104720 PE=4 SV=1	0	37.465	14	12	18	12	1	876	98.9	5.69	44.96	12	Not Found	High	High	High	High	High	Medium	High		0		0
High	Master Protein	G7J5Y6	Transmembrane protein, putative OS=Medicago truncatula GN=MTR_3g115930 PE=2 SV=1	0	37.374	30	5	25	3	1	169	17.9	9.66	78.93	5	Not Found	Medium	Medium	High	High	High	High	High	Deamidated [Q148]	0		0
High	Master Protein	G7KEZ1	Isoflavone reductase-like protein OS=Medicago truncatula GN=MTR_5g020800 PE=4 SV=1	0	37.309	32	9	16	8	1	318	35.4	5.58	49.78	9	High	Not Found	High	High	High	High	High	Not Found		0		0
High	Master Protein	G7IMW8	Importin subunit alpha OS=Medicago truncatula GN=MTR_2g034900 PE=3 SV=2	0	37.302	14	5	10	2	1	530	58.4	5.26	47.53	5	Not Found	Not Found	Not Found	Not Found	High	Not Found	High	Not Found		0		0
High	Master Protein	G7KF10	p-loop nucleoside triphosphate hydrolase superfamily protein OS=Medicago truncatula GN=MTR_5g020990 PE=3 SV=1	0	37.238	11	5	11	3	1	483	55.5	7.15	36.95	5	Not Found	High	High	Not Found	Not Found	High	High	High		0		0
High	Master Protein	A0A072VNR5	VAMP-associated protein OS=Medicago truncatula GN=MTR_1g081950 PE=4 SV=1	0	37.198	23	10	13	10	1	435	48.7	6.05	41.13	10	High	High	High	Not Found	High	High	High	High		0		0
High	Master Protein	A0A072UMA6	Phosphoribulokinase/uridine kinase-like protein OS=Medicago truncatula GN=MTR_4g073890 PE=4 SV=1	0	37.175	18	10	13	7	1	687	76.8	8.41	43.63	10	Not Found	High	High	High	High	High	High	Not Found		0		0
High	Master Protein	A0A072UM12	Glucosidase II beta subunit-like protein OS=Medicago truncatula GN=MTR_4g083360 PE=4 SV=1	0	37.132	19	9	9	9	1	644	72.9	4.73	35.76	9	High	High	Not Found	High	Not Found	Not Found	Not Found	High		0		0
High	Master Protein	G8A036	Translocation protein TolB OS=Medicago truncatula GN=MTR_1g032010 PE=4 SV=1	0	37.121	21	10	11	10	1	650	72.6	5.87	38.24	10	Not Found	Not Found	High	High	High	High	Not Found	High		0		0
High	Master Protein	G7ZVI1	Phototropic-responsive NPH3 family protein OS=Medicago truncatula GN=MTR_8g078900 PE=3 SV=1	0	37.105	15	8	10	7	1	661	73.4	5.3	24.17	8	Not Found	Not Found	Not Found	High	High	High	High	High		0		0
High	Master Protein	G8A186	60S ribosomal L21-like protein OS=Medicago truncatula GN=MTR_7g107420 PE=2 SV=1	0	37.072	34	10	31	2	1	164	18.7	10.49	113.17	10	Not Found	Not Found	Not Found	High	High	Not Found	Not Found	Not Found		0		0
High	Master Protein	A0A072U3Y3	Exocyst complex component sec15B OS=Medicago truncatula GN=MTR_7g108785 PE=4 SV=1	0	37.048	12	8	11	8	1	803	90.7	6.13	39.57	8	Not Found	Not Found	High	High	High	High	High	High		0		0
High	Master Protein	G7J6K3	Guanine nucleotide-binding protein beta subunit-like protein OS=Medicago truncatula GN=MTR_3g116500 PE=4 SV=1	0	37.04	14	6	17	6	1	378	41	7.62	63.82	6	Not Found	Not Found	High	High	High	High	High	High		0		0
High	Master Protein	A0A072TYM4	Ribosomal protein L7Ae/L30e/S12e/Gadd45 family protein OS=Medicago truncatula GN=MTR_7g027235 PE=4 SV=1	0	37.023	34	10	26	4	1	260	29.5	10.27	89.96	10	High	Not Found	High	High	High	High	High	Not Found		0		0
High	Master Protein	G7K980	Terpene cyclase/mutase family member OS=Medicago truncatula GN=MTR_5g008810 PE=3 SV=1	0	36.973	13	8	9	8	1	757	86.4	6.58	33.56	8	Not Found	High	High	High	Not Found	Not Found	High	High		0		0
High	Master Protein	G7I3R9	NADH-ubiquinone oxidoreductase 51 kDa subunit OS=Medicago truncatula GN=MTR_1g042300 PE=4 SV=2	0	36.972	27	11	17	11	1	483	52.9	8.27	45.75	11	Not Found	Not Found	High	High	High	High	High	High		0		0
High	Master Protein	G7IHV2	PfkB family carbohydrate kinase OS=Medicago truncatula GN=MTR_2g098950 PE=3 SV=1	0	36.966	22	6	7	5	1	329	35.2	5.35	26.32	6	Not Found	High	High	High	Not Found	High	Not Found	High		0		0
High	Master Protein	G7JIQ2	O-glycosyl hydrolase family 17 protein OS=Medicago truncatula GN=MTR_4g083500 PE=3 SV=2	0	36.959	15	8	21	8	1	531	57.5	8.43	71.64	8	Not Found	Not Found	High	High	High	High	High	High	Carboxymethyl [C437]	0		0
High	Master Protein	G7JB01	40S ribosomal protein SA OS=Medicago truncatula GN=MTR_3g095810 PE=2 SV=1	0	36.922	23	7	16	7	1	299	33.1	5.02	59.53	7	Not Found	Not Found	Not Found	Not Found	High	High	High	High		0		0
High	Master Protein	G7JWI7	Acylamino-acid-releasing enzyme-like protein, putative OS=Medicago truncatula GN=MTR_5g042400 PE=4 SV=2	0	36.906	11	5	7	5	1	833	90.9	6.42	35.44	5	Not Found	High	Not Found	High	High	High	Not Found	High		0		0
High	Master Protein	G7JRX9	Peptidyl-prolyl cis-trans isomerase OS=Medicago truncatula GN=MTR_4g111720 PE=4 SV=1	0	36.9	34	8	9	8	1	322	35.4	8.94	30.4	8	Not Found	Not Found	High	High	Not Found	High	High	High		0		0
High	Master Protein	A0A072TYG5	Dynamin-like protein 1E OS=Medicago truncatula GN=MTR_7g451010 PE=3 SV=1	0	36.898	12	9	18	1	1	617	69	7.21	56.65	9	Not Found	Not Found	Not Found	Not Found	Not Found	Not Found	High	Not Found		0		0
High	Master Protein	B7FI39	12-oxophytodienoate reductase-like protein OS=Medicago truncatula GN=MTR_5g006750 PE=2 SV=1	0	36.897	26	9	16	4	1	371	41.2	6.37	51.73	9	Not Found	High	Not Found	High	High	High	High	High		0		0
High	Master Protein	G7II21	Protein disulfide isomerase-like protein OS=Medicago truncatula GN=MTR_2g101880 PE=4 SV=1	0	36.888	21	10	16	10	1	520	58.7	5.35	50.6	10	High	High	High	High	High	High	High	High		0		0
High	Master Protein	B7FKV5	Vesicle-associated-like protein OS=Medicago truncatula GN=MTR_2g089995 PE=2 SV=1	0	36.833	31	8	13	4	1	271	30.5	8.9	48.27	8	Not Found	High	High	High	High	Not Found	Not Found	Not Found		0		0
High	Master Protein	A0A072UMS0	Guanylate-binding family protein OS=Medicago truncatula GN=MTR_4g088220 PE=4 SV=1	0	36.813	12	10	16	10	1	1060	120.7	7.3	46.63	10	High	High	High	High	High	Medium	Not Found	Not Found		0		0
High	Master Protein	A0A072UM96	LRR receptor-like kinase OS=Medicago truncatula GN=MTR_4g065003 PE=4 SV=1	0	36.809	14	6	17	3	1	492	55.5	6.43	59.28	6	Not Found	Not Found	Not Found	High	High	Not Found	High	High		0		0
High	Master Protein	G7L6U5	Auxin-binding protein ABP19a OS=Medicago truncatula GN=MTR_8g020590 PE=2 SV=1	0	36.791	15	4	20	4	1	208	21.6	8.02	73.95	4	High	High	High	High	High	High	High	High		0		0
High	Master Protein	A0A072VG42	Fatty acid hydroperoxide lyase OS=Medicago truncatula GN=MTR_1g034330 PE=3 SV=1	0	36.767	21	11	16	9	1	489	55.1	7.65	41.09	11	Not Found	High	High	High	High	High	High	High		0		0
High	Master Protein	G7IET9	ATP-dependent Clp protease proteolytic subunit OS=Medicago truncatula GN=MTR_1g106550 PE=3 SV=1	0	36.756	18	5	7	5	1	373	41.3	9.11	31.46	5	Not Found	Not Found	Not Found	High	High	Not Found	Not Found	Not Found		0		0
High	Master Protein	Q1SN32	Pyruvate kinase OS=Medicago truncatula GN=MTR_1g061630 PE=3 SV=1	0	36.671	18	10	13	8	1	529	57.7	6.61	41.55	10	Not Found	High	Not Found	Not Found	High	High	High	High		0		0
High	Master Protein	A0A072VDJ3	Ribulose bisphosphate carboxylase/oxygenase activase OS=Medicago truncatula GN=MTR_2g105480 PE=4 SV=1	0	36.65	21	6	7	6	1	418	47.5	7.69	28.05	6	Not Found	Not Found	High	High	Not Found	Not Found	High	High		0		0
High	Master Protein	A0A072VMR9	60S ribosomal protein L23a-2 OS=Medicago truncatula GN=MTR_2g096340 PE=3 SV=1	0	36.6	39	7	15	7	1	161	18.1	10.24	60.13	7	Not Found	Not Found	High	High	High	High	High	High		0		0
High	Master Protein	G7I394	Major intrinsic protein (MIP) family transporter OS=Medicago truncatula GN=MTR_1g095070 PE=3 SV=1	0	36.539	25	4	14	2	1	221	23.5	9.44	35.36	4	Not Found	Not Found	Medium	High	High	High	High	Not Found	Phospho [S214]	0		0
High	Master Protein	G7JBQ7	PsbP domain protein OS=Medicago truncatula GN=MTR_3g108040 PE=4 SV=1	0	36.48	32	6	9	6	1	293	33.2	8.19	38.17	6	Not Found	Not Found	High	High	High	High	High	High		0		0
High	Master Protein	G7LAE7	Peptidylprolyl isomerase OS=Medicago truncatula GN=MTR_8g091410 PE=2 SV=1	0	36.479	20	6	12	6	1	213	22.8	8.15	40.63	6	Not Found	High	Not Found	High	High	High	High	High		0		0
High	Master Protein	G7II11	Coatomer subunit delta-like protein OS=Medicago truncatula GN=MTR_2g101180 PE=3 SV=1	0	36.438	22	8	11	7	1	531	58.5	5.97	42	8	Not Found	Not Found	High	High	Not Found	Not Found	Not Found	High		0		0
High	Master Protein	G7IED1	Stem-loop-binding protein of 41 kDa protein A OS=Medicago truncatula GN=MTR_1g072260 PE=4 SV=1	0	36.433	16	6	15	6	1	401	43.4	7.33	55.04	6	High	High	High	High	High	High	High	High		0		0
High	Master Protein	G7IQY1	Plant/F14G9-20 protein OS=Medicago truncatula GN=MTR_2g066060 PE=2 SV=2	0	36.394	20	7	12	7	1	392	43.5	6.55	40.08	7	Not Found	High	High	High	High	High	High	High		0		0
High	Master Protein	G7K1J8	3-ketoacyl-CoA synthase OS=Medicago truncatula GN=MTR_5g056510 PE=3 SV=1	0	36.39	15	7	10	1	1	496	56.4	9.09	33.36	7	Not Found	Not Found	High	Not Found	Not Found	Not Found	Not Found	Not Found	Deamidated [Q402]	0		0
High	Master Protein	A0A072VJK4	LETM1-like protein OS=Medicago truncatula GN=MTR_1g058390 PE=4 SV=1	0	36.376	9	9	11	7	1	906	100.4	5.82	33.1	9	Not Found	High	High	Not Found	High	High	High	High		0		0
High	Master Protein	G7JGW7	Alpha/beta fold hydrolase OS=Medicago truncatula GN=MTR_4g010000 PE=4 SV=2	0	36.366	15	4	7	4	1	383	42.5	8.62	30.09	4	Not Found	Not Found	Not Found	High	High	Medium	Not Found	High		0		0
High	Master Protein	S4SZL4	Ribosomal protein S7 OS=Medicago truncatula GN=rps7 PE=3 SV=1	0	36.358	36	7	31	1	1	157	17.8	11.62	99.48	7	Not Found	Not Found	Not Found	Not Found	Not Found	High	High	High		0		0
High	Master Protein	G7J3X9	General regulatory factor 2 OS=Medicago truncatula GN=MTR_3g099380 PE=3 SV=2	0	36.31	35	8	24	4	1	260	29.3	4.79	50.4	8	Not Found	Not Found	High	High	Not Found	Not Found	Not Found	Not Found		0		0
High	Master Protein	G7JAT4	Long-chain-fatty-acid CoA ligase (AMP-forming) OS=Medicago truncatula GN=MTR_3g084470 PE=4 SV=2	0	36.309	11	7	14	7	1	715	80	8.24	44.05	7	Not Found	Not Found	High	High	High	High	High	Not Found		0		0
High	Master Protein	A0A072V507	Lactoylglutathione lyase OS=Medicago truncatula GN=MTR_2g023500 PE=3 SV=1	0	36.25	27	6	9	5	1	287	32.1	5.59	34.1	6	Not Found	Not Found	High	High	High	Not Found	High	High	Deamidated [Q280]	0		0
High	Master Protein	G7L1X0	GDP-D-mannose-3,5-epimerase OS=Medicago truncatula GN=MTR_7g115080 PE=4 SV=1	0	36.244	21	7	18	2	1	411	46.4	6.47	77.63	7	Not Found	Not Found	High	High	High	High	High	High		0		0
High	Master Protein	G7LIL6	O-glycosyl hydrolase family 17 protein OS=Medicago truncatula GN=MTR_8g085720 PE=3 SV=1	0	36.222	10	4	9	4	1	498	53.3	5.68	44.92	4	Not Found	Not Found	Not Found	High	Not Found	High	High	High		0		0
High	Master Protein	G7K9G8	Uncharacterized protein OS=Medicago truncatula GN=MTR_5g018590 PE=4 SV=1	0	36.207	22	4	7	4	1	161	16.8	5.03	33.11	4	High	High	High	Not Found	Not Found	Not Found	Not Found	Not Found		0		0
High	Master Protein	B7FJU0	Ornithine cyclodeaminase/mu-crystallin OS=Medicago truncatula GN=MTR_1g099620 PE=2 SV=1	0	36.199	20	4	6	4	1	336	36.4	6.35	34.07	4	Not Found	Not Found	Not Found	Not Found	Not Found	High	High	High		0		0
High	Master Protein	G7I3Z0	N-carbamyl-L-amino acid amidohydrolase OS=Medicago truncatula GN=MTR_1g075320 PE=4 SV=2	0	36.18	22	10	16	10	1	469	50.8	5.82	54.09	10	Not Found	High	Not Found	High	High	High	High	High		0		0
High	Master Protein	A0A072U637	Serine/Threonine kinase family protein OS=Medicago truncatula GN=MTR_8g100085 PE=4 SV=1	0	36.149	18	6	14	5	1	414	46.3	7.49	42.06	6	Not Found	High	High	High	Not Found	Not Found	High	High		0		0
High	Master Protein	B7FK85	Sucrase/ferredoxin family protein OS=Medicago truncatula GN=MTR_7g033625 PE=2 SV=1	0	36.12	16	6	14	6	1	344	37.7	6.39	56.3	6	Not Found	High	High	Not Found	High	High	High	High		0		0
High	Master Protein	G7JQK5	Saccharopine dehydrogenase OS=Medicago truncatula GN=MTR_4g076230 PE=4 SV=2	0	36.084	19	8	15	8	1	422	45.5	7.36	50.11	8	High	Not Found	Not Found	Not Found	High	High	High	High		0		0
High	Master Protein	I3SDG7	F0F1-type ATP synthase, delta subunit OS=Medicago truncatula GN=MTR_3g028730 PE=2 SV=1	0	36.069	39	9	23	9	1	244	26.7	9.72	62.81	9	High	High	High	High	High	High	High	High		0		0
High	Master Protein	G7KXR2	Transaldolase family protein OS=Medicago truncatula GN=MTR_7g006560 PE=3 SV=1	0	35.999	18	6	8	6	1	443	48.5	6.6	33.46	6	High	Not Found	High	High	High	High	Not Found	Not Found		0		0
High	Master Protein	G7K4N6	Import inner membrane translocase subunit TIM50 OS=Medicago truncatula GN=MTR_5g095530 PE=4 SV=1	0	35.99	19	6	12	6	1	374	42.1	8.69	53.68	6	Not Found	High	High	High	High	High	High	High		0		0
High	Master Protein	A0A072V158	60S ribosomal protein L10-2 OS=Medicago truncatula GN=MTR_3g094230 PE=4 SV=1	0	35.988	37	12	36	1	1	224	25.3	10.29	93.4	12	Not Found	Not Found	Not Found	High	High	High	Medium	High		0		0
High	Master Protein	G7JCT7	Casein kinase OS=Medicago truncatula GN=MTR_4g095400 PE=3 SV=1	0	35.961	21	7	8	7	1	388	45.3	8.68	31.49	7	Not Found	Not Found	Not Found	High	High	High	Not Found	High		0		0
High	Master Protein	G7IMC1	3-isopropylmalate dehydrogenase OS=Medicago truncatula GN=MTR_2g104610 PE=3 SV=1	0	35.954	24	7	7	7	1	405	43.7	6.38	25.63	7	Not Found	Not Found	Medium	Not Found	High	High	High	High		0		0
High	Master Protein	G7JCC8	Uncharacterized protein OS=Medicago truncatula GN=MTR_3g108780 PE=4 SV=1	0	35.947	20	7	8	7	1	608	65.3	7.02	36.34	7	Not Found	Not Found	High	High	High	High	Not Found	High		0		0
High	Master Protein	A0A072TT49	Polysaccharide biosynthesis protein OS=Medicago truncatula GN=MTR_8g080660 PE=4 SV=1	0	35.925	23	6	11	6	1	297	33.7	7.52	43.4	6	Not Found	High	High	High	High	High	Not Found	Not Found		0		0
High	Master Protein	G7K0L3	Peroxisomal acetoacetyl-coenzyme A thiolase OS=Medicago truncatula GN=MTR_5g098310 PE=3 SV=1	0	35.923	19	6	14	6	1	407	41.6	6.57	51.72	6	Not Found	High	High	High	High	High	High	High		0		0
High	Master Protein	B7FMP6	Nucleoside diphosphate kinase OS=Medicago truncatula GN=MTR_4g104030 PE=2 SV=1	0	35.916	22	6	15	3	1	230	25.5	8.57	55.85	6	Not Found	Not Found	High	Not Found	Not Found	High	High	Not Found		0		0
High	Master Protein	A0A072VPJ2	NADP-dependent malate dehydrogenase OS=Medicago truncatula GN=MTR_1g090730 PE=4 SV=1	0	35.915	18	7	10	7	1	437	47.9	7.02	37.52	7	Not Found	Not Found	High	High	High	High	High	Not Found		0		0
High	Master Protein	G7JNZ5	Mevalonate/galactokinase family protein OS=Medicago truncatula GN=MTR_4g122670 PE=4 SV=1	0	35.913	16	6	9	6	1	497	54.6	6.1	34.81	6	Not Found	High	High	High	Medium	Not Found	High	High		0		0
High	Master Protein	A0A072UKS2	PfkB family carbohydrate kinase OS=Medicago truncatula GN=MTR_4g067310 PE=3 SV=1	0	35.891	21	6	8	5	1	331	35.3	5.34	32.84	6	Not Found	High	High	High	Not Found	High	High	Not Found		0		0
High	Master Protein	A0A072V056	Enhanced disease susceptibility protein OS=Medicago truncatula GN=MTR_3g078633 PE=4 SV=1	0	35.889	15	9	15	8	1	618	70.6	6.96	44.27	9	High	Not Found	High	High	High	High	High	High		0		0
High	Master Protein	G7LHF7	TCP-1/cpn60 chaperonin family protein OS=Medicago truncatula GN=MTR_8g017080 PE=3 SV=1	0	35.851	16	8	11	8	1	576	61.6	7.39	38.81	8	Not Found	Medium	High	High	High	High	Not Found	Not Found		0		0
High	Master Protein	I3T8M7	60S ribosomal L21-like protein OS=Medicago truncatula GN=MTR_1g069905 PE=2 SV=1	0	35.788	34	10	30	2	1	164	18.7	10.49	108.66	10	Not Found	Not Found	Not Found	High	High	Not Found	Not Found	Not Found	Deamidated [R43]	0		0
High	Master Protein	G7I5B0	30S ribosomal protein S9P OS=Medicago truncatula GN=MTR_1g021760 PE=2 SV=1	0	35.756	31	6	13	6	1	205	22.2	10.58	50.7	6	Not Found	High	High	High	High	High	High	High		0		0
High	Master Protein	A0A072VKG9	S-adenosylmethionine-dependent methyltransferase, putative OS=Medicago truncatula GN=MTR_1g069785 PE=4 SV=1	0	35.689	15	9	14	6	1	596	68	8.51	37.72	9	Not Found	Not Found	High	High	High	Not Found	Not Found	High		0		0
High	Master Protein	B7FH64	40S ribosomal S3-like protein OS=Medicago truncatula GN=MTR_1g044660 PE=2 SV=1	0	35.653	35	10	32	10	1	239	26.6	9.64	98.7	10	High	High	High	Medium	High	High	High	High		0		0
High	Master Protein	B7FL82	26S proteasome regulatory particle non-ATPase subunit 12 OS=Medicago truncatula GN=MTR_1g016750 PE=2 SV=1	0	35.649	33	6	6	6	1	267	30.9	5.07	28.03	6	Not Found	Not Found	Not Found	High	High	Not Found	Not Found	High		0		0
High	Master Protein	G7K0Z4	Serine/Threonine-kinase TOR OS=Medicago truncatula GN=MTR_5g005380 PE=3 SV=2	0	35.61	4	6	7	6	1	2471	278.1	6.95	31.39	6	Not Found	Not Found	Not Found	High	High	Not Found	High	Not Found	Deamidated [Q1396]	0		0
High	Master Protein	G7ZZ90	Monothiol glutaredoxin-S17 protein OS=Medicago truncatula GN=MTR_4g088905 PE=4 SV=1	0	35.592	18	5	7	5	1	491	53.9	5.39	39.2	5	Not Found	Not Found	High	Not Found	High	High	High	High		0		0
High	Master Protein	G7IHX6	GDSL-like lipase/acylhydrolase OS=Medicago truncatula GN=MTR_2g100620 PE=4 SV=1	0	35.542	22	7	11	5	1	354	38.4	9.04	41.27	7	Not Found	Not Found	Not Found	Not Found	High	High	High	High		0		0
High	Master Protein	A0A072TTY6	Acyl-coenzyme A oxidase OS=Medicago truncatula GN=MTR_8g090375 PE=3 SV=1	0	35.535	11	7	7	7	1	689	77.3	8.5	29.29	7	Not Found	Not Found	Not Found	High	High	Not Found	High	High		0		0
High	Master Protein	Q4JR85	Dehydroascorbate reductase OS=Medicago truncatula GN=MTR_3g066060 PE=2 SV=1	0	35.509	34	6	13	5	1	264	29.5	6.7	42.67	6	Not Found	Not Found	High	Not Found	Not Found	High	High	High		0		0
High	Master Protein	A0A072UH44	DUF2921 family protein OS=Medicago truncatula GN=MTR_4g011610 PE=4 SV=1	0	35.501	7	6	10	6	1	1062	119.9	6.58	39.2	6	Not Found	High	Not Found	Medium	Medium	High	High	High		0		0
High	Master Protein	A0A072TMB8	Dynamin-like protein 1E OS=Medicago truncatula GN=MTR_8g027675 PE=3 SV=1	0	35.446	14	9	16	1	1	610	68.3	7.8	48.16	9	Not Found	Not Found	Not Found	Not Found	Not Found	Not Found	High	Not Found	Carboxymethyl [C174]; Deamidated [Q184]	0		0
High	Master Protein	A0A072UZF4	Endoplasmic reticulum vesicle transporter OS=Medicago truncatula GN=MTR_3g081480 PE=4 SV=1	0	35.42	15	5	8	5	1	355	40.5	6.92	38.21	5	Not Found	Not Found	High	High	High	High	Not Found	Not Found		0		0
High	Master Protein	A0A072UA74	Gibberellin receptor GID1 OS=Medicago truncatula GN=MTR_6g464320 PE=4 SV=1	0	35.416	22	6	8	5	1	330	37.2	5.35	33.32	6	Not Found	Not Found	Not Found	High	High	High	High	High		0		0
High	Master Protein	G7ZZE4	3-ketoacyl-CoA synthase OS=Medicago truncatula GN=MTR_1g110930 PE=3 SV=1	0	35.414	15	7	10	1	1	496	55.9	9.03	33.1	7	Not Found	Not Found	High	High	Not Found	Not Found	Not Found	Not Found	Deamidated [Q402]	0		0
High	Master Protein	G7ZUM0	60S ribosomal protein L10-2 OS=Medicago truncatula GN=MTR_2g090910 PE=4 SV=1	0	35.36	37	12	33	1	1	223	25.2	10.35	86.82	12	Not Found	Not Found	Not Found	Not Found	Not Found	High	Not Found	High		0		0
High	Master Protein	A0A072UIZ0	Strictosidine synthase family protein OS=Medicago truncatula GN=MTR_4g050190 PE=4 SV=1	0	35.302	21	5	11	5	1	391	43.8	6.7	54.43	5	Not Found	Not Found	High	High	High	High	High	High		0		0
High	Master Protein	G7KID3	UDP-glucosyltransferase family protein OS=Medicago truncatula GN=MTR_6g042310 PE=4 SV=1	0	35.238	23	10	13	8	1	469	53.6	6.76	40.5	10	Not Found	Not Found	High	High	Not Found	High	High	Not Found	Deamidated [Q294; Q295]	0		0
High	Master Protein	Q2HVW5	Nucleoporin interacting component, putative OS=Medicago truncatula GN=MTR_2g103370 PE=4 SV=1	0	35.211	14	11	14	11	1	859	95.9	6.84	42.53	11	Not Found	High	High	High	Not Found	High	High	High		0		0
High	Master Protein	G7IP86	Auxin-responsive family protein OS=Medicago truncatula GN=MTR_2g026080 PE=4 SV=1	0	35.154	18	6	16	6	1	402	44	9.45	47.91	6	Not Found	Medium	High	High	High	High	High	High	Deamidated [Q388]	0		0
High	Master Protein	B7FKU8	50S ribosomal protein L19-2 OS=Medicago truncatula GN=MTR_5g013300 PE=2 SV=1	0	35.052	23	7	12	7	1	229	25.4	9.23	44.16	7	High	High	High	High	Not Found	High	High	High		0		0
High	Master Protein	A0A072U1I8	Glutamate dehydrogenase OS=Medicago truncatula GN=MTR_7g085630 PE=3 SV=1	0	35.025	19	8	11	2	1	492	53.9	7.93	33.54	8	Not Found	Not Found	Not Found	Not Found	Not Found	Not Found	High	High		0		0
High	Master Protein	A0A072UR30	Carbohydrate-binding protein of the ER protein OS=Medicago truncatula GN=MTR_4g095018 PE=4 SV=1	0	34.996	14	7	12	6	1	593	66.2	7.18	33.38	7	Not Found	Not Found	High	Not Found	High	High	High	High		0		0
High	Master Protein	A0A072VF81	Plant/F18O14-17 protein OS=Medicago truncatula GN=MTR_1g022045 PE=4 SV=1	0	34.969	13	8	10	8	1	649	71.9	7.33	36.53	8	High	High	Not Found	High	Not Found	High	High	Not Found		0		0
High	Master Protein	G7LAF3	Cellulose synthase-interactive protein OS=Medicago truncatula GN=MTR_8g091470 PE=4 SV=2	0	34.937	4	8	9	8	1	2216	237.2	5.66	28.99	8	Not Found	Not Found	Not Found	High	High	High	Not Found	High		0		0
High	Master Protein	G7JZW6	Cytochrome P450 family ent-kaurenoic acid oxidase OS=Medicago truncatula GN=MTR_5g014240 PE=3 SV=1	0	34.935	17	7	11	7	1	490	56.5	8.98	33.54	7	Not Found	Not Found	Not Found	High	High	High	High	High		0		0
High	Master Protein	A0A072TEB1	Alpha/beta hydrolase family protein OS=Medicago truncatula GN=MTR_0493s0030 PE=4 SV=1	0	34.899	23	5	9	5	1	373	41.3	8.62	38.31	5	Not Found	High	High	High	High	High	High	High		0		0
High	Master Protein	A2Q5A6	NADH-quinone oxidoreductase subunit C OS=Medicago truncatula GN=ndhJ PE=3 SV=1	0	34.88	30	4	9	4	1	158	18.6	6.64	43.55	4	Not Found	Not Found	Not Found	High	High	High	Not Found	High		0		0
High	Master Protein	G7IBV7	Light-harvesting complex I chlorophyll A/B-binding protein OS=Medicago truncatula GN=MTR_1g098280 PE=2 SV=1	0	34.874	26	8	14	8	1	175	19.2	9.22	48.42	8	Not Found	Not Found	High	High	High	High	High	High		0		0
High	Master Protein	G7LDS2	30S ribosomal protein S20 OS=Medicago truncatula GN=MTR_8g061350 PE=3 SV=1	0	34.847	25	6	13	6	1	173	19.1	10.58	50.49	6	High	High	Not Found	Not Found	Not Found	High	High	High		0		0
High	Master Protein	A0A072TVF6	Calmodulin-domain kinase CDPK protein OS=Medicago truncatula GN=MTR_8g099095 PE=4 SV=1	0	34.831	18	9	14	6	1	516	58	6.34	44.81	9	High	High	High	High	High	Not Found	High	High		0		0
High	Master Protein	G7J524	Argininosuccinate synthase OS=Medicago truncatula GN=MTR_3g088970 PE=3 SV=1	0	34.777	25	8	9	7	1	477	52.7	6.71	34.06	8	Not Found	High	Not Found	High	High	High	High	Not Found	Deamidated [Q376]	0		0
High	Master Protein	A2Q5C6	Generic methyltransferase OS=Medicago truncatula GN=MTR_7g076170 PE=4 SV=1	0	34.775	18	10	14	7	1	638	73	7.31	46.45	10	High	Not Found	High	High	Not Found	High	High	High		0		0
High	Master Protein	G7IN73	Eukaryotic translation initiation factor 3 subunit C OS=Medicago truncatula GN=MTR_2g005610 PE=3 SV=1	0	34.753	11	8	10	8	1	984	110.9	5.97	35.9	8	Not Found	Medium	High	Not Found	High	High	Not Found	High	Deamidated [R537]	0		0
High	Master Protein	G7L831	TCP-1/cpn60 chaperonin family protein OS=Medicago truncatula GN=MTR_8g088270 PE=3 SV=1	0	34.724	17	10	14	10	1	544	58.8	6.16	38.86	10	Not Found	Not Found	High	High	High	High	High	High		0		0
High	Master Protein	G7J9T2	Protein phosphatase 2C-like protein OS=Medicago truncatula GN=MTR_3g105880 PE=2 SV=1	0	34.684	24	6	6	6	1	362	39.9	5.26	26.21	6	High	High	High	Not Found	Not Found	Not Found	Not Found	High		0		0
High	Master Protein	I3T3U6	60S ribosomal protein L36 OS=Medicago truncatula GN=MTR_6g053730 PE=2 SV=1	0	34.683	37	9	21	1	1	111	12.4	11.36	67.69	9	Not Found	Not Found	Not Found	Not Found	High	High	High	Not Found	Deamidated [R59]	0		0
High	Master Protein	A0A072UC24	Coiled-coil vesicle tethering protein, putative OS=Medicago truncatula GN=MTR_6g088595 PE=4 SV=1	0	34.662	10	5	6	5	1	711	79.4	5.22	27.54	5	Not Found	High	High	High	High	Not Found	Not Found	Not Found		0		0
High	Master Protein	B7FGM7	Ribosomal protein S25 OS=Medicago truncatula GN=MTR_2g086610 PE=2 SV=1	0	34.564	55	7	22	7	1	107	11.8	10.81	59.73	7	Not Found	High	High	High	High	High	High	High		0		0
High	Master Protein	G7KY75	LRR receptor-like kinase OS=Medicago truncatula GN=MTR_7g074010 PE=3 SV=2	0	34.556	11	11	17	9	1	962	107.5	7.43	44.67	11	Not Found	Not Found	High	High	High	High	Not Found	Not Found		0		0
High	Master Protein	G7K802	SEC8 exocyst complex component specific domain protein OS=Medicago truncatula GN=MTR_5g017640 PE=4 SV=2	0	34.521	8	7	8	4	1	1063	118.4	5.69	31.84	7	High	Not Found	Not Found	High	Not Found	High	Not Found	Not Found		0		0
High	Master Protein	G7JBK8	Cyanobacterial and plant NDH-1 subunit O OS=Medicago truncatula GN=MTR_3g096290 PE=4 SV=1	0	34.504	33	5	9	5	1	159	17.7	9	30.08	5	High	High	High	High	Not Found	Medium	Not Found	High		0		0
High	Master Protein	G7IJ13	Proteasome subunit alpha type OS=Medicago truncatula GN=MTR_2g060830 PE=2 SV=1	0	34.496	35	8	12	8	1	246	27.2	6.02	47.12	8	High	High	High	High	High	High	High	High		0		0
High	Master Protein	G7KRA6	TCP-1/cpn60 chaperonin family protein OS=Medicago truncatula GN=MTR_7g067470 PE=3 SV=1	0	34.487	15	8	10	8	1	527	57.2	5.52	36.03	8	Medium	High	High	High	High	High	Not Found	Not Found		0		0
High	Master Protein	Q8GRK2	Somatic embryogenesis receptor kinase 1 OS=Medicago truncatula GN=SERK1 PE=2 SV=1	0	34.451	12	5	11	3	1	627	69.1	5.74	48.12	5	Not Found	Not Found	Not Found	High	High	Not Found	Not Found	High	Carboxymethyl [C389]	0		0
High	Master Protein	A0A072VAU6	DUF2921 family protein OS=Medicago truncatula GN=MTR_2g079300 PE=4 SV=1	0	34.443	11	10	12	9	1	915	104.1	7.25	37.91	10	High	Not Found	High	High	High	High	High	High		0		0
High	Master Protein	A0A072U4H1	Heat shock protein-binding protein OS=Medicago truncatula GN=MTR_7g115670 PE=4 SV=1	0	34.418	15	6	12	6	1	266	29.5	9.47	53.95	6	High	High	High	High	High	Not Found	Not Found	High		0		0
High	Master Protein	A0A072TWK0	Patatin OS=Medicago truncatula GN=MTR_8g007140 PE=3 SV=1	0	34.405	20	7	14	6	1	409	44.9	5.48	45.07	7	High	High	Not Found	Not Found	Not Found	High	High	High		0		0
High	Master Protein	A0A072TGQ9	Alpha-1,4 glucan phosphorylase OS=Medicago truncatula GN=MTR_0288s0040 PE=3 SV=1	0	34.383	11	9	12	5	1	914	103.3	5.19	31.19	9	High	Not Found	High	High	High	High	Not Found	Not Found		0		0
High	Master Protein	G7L1P5	Transmembrane protein, putative OS=Medicago truncatula GN=MTR_7g100570 PE=4 SV=1	0	34.362	23	7	12	7	1	145	16.6	9.57	34.67	7	Not Found	Not Found	High	High	Not Found	High	High	High		0		0
High	Master Protein	G7L326	Vesicle transport V-SNARE protein amino-terminal protein OS=Medicago truncatula GN=MTR_7g011570 PE=4 SV=1	0	34.352	10	3	6	3	1	303	34.7	9.63	30.64	3	Not Found	Not Found	High	High	Not Found	Not Found	Not Found	Not Found		0		0
High	Master Protein	G7IEA3	Dihydroorotate dehydrogenase (quinone), mitochondrial OS=Medicago truncatula GN=MTR_1g114530 PE=3 SV=1	0	34.308	16	7	16	7	1	455	48.6	9.26	49.83	7	High	Not Found	High	High	High	High	High	High		0		0
High	Master Protein	A0A072U009	L-type lectin-domain receptor kinase S.4 OS=Medicago truncatula GN=MTR_7g063010 PE=4 SV=1	0	34.297	10	6	16	5	1	722	80.5	7.23	58.3	6	Not Found	Not Found	High	High	High	High	High	High		0		0
High	Master Protein	G7JDY8	3-oxoacyl-(Acyl carrier) synthase II OS=Medicago truncatula GN=MTR_4g096690 PE=3 SV=1	0	34.266	10	6	7	5	1	470	49.9	7.93	27.19	6	Not Found	High	High	High	Not Found	High	Not Found	High		0		0
High	Master Protein	G7I3D6	Rab GTPase activator OS=Medicago truncatula GN=MTR_1g007590 PE=4 SV=1	0	34.245	15	5	8	5	1	591	66.1	5.66	36.82	5	Not Found	High	High	High	High	High	Not Found	Not Found		0		0
High	Master Protein	A0A072U790	Feronia receptor-like kinase OS=Medicago truncatula GN=MTR_7g015390 PE=4 SV=1	0	34.211	11	8	8	7	1	889	101.3	6.7	27.81	8	Not Found	Not Found	High	High	High	Not Found	High	Not Found		0		0
High	Master Protein	G7J4Q1	Endoglucanase OS=Medicago truncatula GN=MTR_3g113720 PE=3 SV=2	0	34.187	13	8	13	8	1	529	57.8	6.13	43.56	8	Not Found	Not Found	High	Not Found	High	High	High	High		0		0
High	Master Protein	A0A072TKH3	NADH dehydrogenase [ubiquinone] 1 alpha subcomplex subunit 12 OS=Medicago truncatula GN=MTR_8g009960 PE=3 SV=1	0	34.183	33	9	20	9	1	159	18.4	8.84	62.05	9	High	Not Found	High	High	High	High	High	High		0		0
High	Master Protein	G7KT76	Ferritin OS=Medicago truncatula GN=MTR_7g069980 PE=2 SV=1	0	34.159	24	5	17	3	1	256	28.8	6.46	63.89	5	Not Found	High	High	Not Found	High	High	High	High		0		0
High	Master Protein	A0A072TZA9	Zinc-binding dehydrogenase family oxidoreductase OS=Medicago truncatula GN=MTR_7g034395 PE=4 SV=1	0	34.146	30	7	11	7	1	317	33.9	5.73	43.5	7	High	High	High	Not Found	High	High	High	Not Found		0		0
High	Master Protein	A0A072UKP4	NADH-ubiquinone oxidoreductase, putative OS=Medicago truncatula GN=MTR_6g053280 PE=4 SV=1	0	34.134	26	6	14	6	1	269	30.7	6.86	45.3	6	High	Not Found	High	High	High	High	High	High		0		0
High	Master Protein	G7L4A2	Tplate-like protein OS=Medicago truncatula GN=MTR_7g031450 PE=4 SV=1	0	34.129	9	8	11	8	1	934	103.6	5.96	40.59	8	High	High	Not Found	Not Found	High	High	High	High		0		0
High	Master Protein	G7IEA4	p-loop nucleoside triphosphate hydrolase superfamily protein OS=Medicago truncatula GN=MTR_1g114540 PE=3 SV=1	0	34.123	8	7	10	7	1	1159	131	7.65	31.23	7	High	Not Found	Not Found	Not Found	High	High	High	High		0		0
High	Master Protein	G7LBA5	60S ribosomal L6-like protein OS=Medicago truncatula GN=MTR_8g091910 PE=4 SV=1	0	34.097	36	8	26	3	1	219	24.4	10.08	94.29	8	Not Found	Not Found	High	High	High	High	High	High		0		0
High	Master Protein	A0A072UPD9	Tetraspanin family protein OS=Medicago truncatula GN=MTR_4g098860 PE=4 SV=1	0	34.059	20	4	15	3	1	280	31.6	5.2	56.64	4	Not Found	High	Not Found	High	High	High	High	High	Deamidated [Q269]	0		0
High	Master Protein	A0A072UUT9	Glycyl-tRNA synthetase/glycine-tRNA ligase OS=Medicago truncatula GN=MTR_3g006730 PE=4 SV=1	0	34.056	10	7	15	1	1	856	96.2	7.3	52.39	7	Not Found	Not Found	Not Found	Not Found	Not Found	Not Found	High	Not Found		0		0
High	Master Protein	B7FGL9	Ribosomal protein OS=Medicago truncatula GN=MTR_3g070930 PE=2 SV=1	0	34.014	25	5	10	2	1	216	24.4	9.83	49.31	5	Not Found	Not Found	High	Not Found	High	High	High	High		0		0
High	Master Protein	A2Q5T7	H+-transporting two-sector ATPase, C (AC39) subunit OS=Medicago truncatula GN=MTR_7g009590 PE=4 SV=1	0	33.994	26	9	21	9	1	351	40.7	5.06	72.81	9	Not Found	High	High	High	High	High	High	Medium		0		0
High	Master Protein	A0A072TXY5	Heat shock 70 kDa protein OS=Medicago truncatula GN=MTR_7g029415 PE=3 SV=1	0	33.972	7	3	21	1	1	629	70.1	6.51	86.1	3	Not Found	Not Found	Not Found	Not Found	Not Found	High	Not Found	Not Found	Phospho [S575]; Deamidated [Q167; R168]	1	Phospho [S575]	0
High	Master Protein	G7K8P7	Trigger factor-like protein OS=Medicago truncatula GN=MTR_5g093830 PE=3 SV=1	0	33.952	17	7	10	7	1	561	63.2	5.2	41.45	7	Not Found	Medium	High	High	High	High	High	High		0		0
High	Master Protein	A0A072TWL0	Nucleoside diphosphate kinase OS=Medicago truncatula GN=MTR_8g007235 PE=3 SV=1	0	33.936	35	6	15	3	1	149	16.5	6.8	51.99	6	Not Found	High	High	Not Found	High	High	Not Found	Not Found		0		0
High	Master Protein	G7IGB4	Heat shock cognate 70 kDa protein OS=Medicago truncatula GN=MTR_2g038270 PE=3 SV=2	0	33.927	9	3	21	1	1	627	70.2	7.62	84.46	3	Not Found	Not Found	Not Found	Not Found	Not Found	High	Not Found	Not Found	Carboxymethyl [C492]; Deamidated [Q168; R169; R508]	0		0
High	Master Protein	A0A072VEQ0	Integrin-linked kinase family protein OS=Medicago truncatula GN=MTR_2g017825 PE=4 SV=1	0	33.918	21	8	12	8	1	457	51.6	8.13	39.53	8	High	High	High	High	High	High	High	Not Found		0		0
High	Master Protein	G7KZK2	CLIP-associating-like protein OS=Medicago truncatula GN=MTR_7g099480 PE=4 SV=2	0	33.914	8	8	9	8	1	1449	159.7	7.14	36.67	8	Not Found	Not Found	High	High	Not Found	High	High	High	Deamidated [Q670]	0		0
High	Master Protein	A0A072UMF9	Serine/threonine protein phosphatase 2A regulatory subunit A OS=Medicago truncatula GN=MTR_6g084690 PE=4 SV=1	0	33.901	12	6	12	5	1	587	65.2	5.03	44.35	6	Not Found	Not Found	Not Found	High	High	High	High	High		0		0
High	Master Protein	G7JG67	RNA-binding (RRM/RBD/RNP motif) family protein OS=Medicago truncatula GN=MTR_4g070080 PE=4 SV=1	0	33.885	33	5	15	5	1	161	15.7	5.6	55.45	5	Not Found	High	High	High	High	High	High	High	Deamidated [Q81]	0		0
High	Master Protein	G7JZV4	Uncharacterized protein OS=Medicago truncatula GN=MTR_5g014110 PE=4 SV=2	0	33.863	23	6	6	6	1	360	39.3	8.72	25.09	6	High	High	Not Found	High	High	Not Found	Not Found	High		0		0
High	Master Protein	A0A072VJE7	40S ribosomal protein S5-2 OS=Medicago truncatula GN=MTR_1g054310 PE=3 SV=1	0	33.795	18	6	28	6	1	239	26.9	9.69	97.12	6	Not Found	Not Found	Not Found	High	High	High	High	High		0		0
High	Master Protein	G7JPK6	Translocon-associated protein alpha subunit OS=Medicago truncatula GN=MTR_4g075340 PE=4 SV=1	0	33.759	20	4	5	4	1	256	27.5	4.88	29.44	4	Not Found	Not Found	High	High	High	Not Found	Not Found	Not Found		0		0
High	Master Protein	G7I2L5	Peptidoglycan-binding domain protein OS=Medicago truncatula GN=MTR_1g072690 PE=4 SV=1	0	33.739	19	7	13	7	1	392	44.4	5.07	37.65	7	High	High	High	High	High	High	Not Found	Not Found		0		0
High	Master Protein	G7K5X3	Cystathionine beta-synthase (CBS) family protein OS=Medicago truncatula GN=MTR_5g076080 PE=4 SV=1	0	33.736	24	7	15	7	1	254	28.1	9.61	50.47	7	Not Found	Not Found	Not Found	High	High	High	Not Found	Medium		0		0
High	Master Protein	I3S7Z5	Peptidyl-prolyl cis-trans isomerase OS=Medicago truncatula GN=MTR_1g117010 PE=2 SV=1	0	33.725	28	6	20	6	1	244	26.2	9.63	69.88	6	Not Found	High	High	High	High	High	High	High		0		0
High	Master Protein	G7JH57	DNA-directed RNA polymerase subunit alpha OS=Medicago truncatula GN=MTR_4g051380 PE=3 SV=2	0	33.721	13	6	14	2	1	442	50	9.66	51.88	6	Not Found	Not Found	Not Found	Not Found	Not Found	Not Found	High	High		0		0
High	Master Protein	G7K139	Non-specific serine/threonine protein kinase OS=Medicago truncatula GN=MTR_5g014700 PE=3 SV=2	0	33.712	8	6	11	6	1	1014	111	6.51	43.35	6	Not Found	Not Found	Not Found	High	High	High	High	High		0		0
High	Master Protein	A0A072UYD4	ARM repeat RING/U-box protein OS=Medicago truncatula GN=MTR_3g466220 PE=4 SV=1	0	33.698	12	7	9	7	1	836	90.6	5.69	33.2	7	Not Found	High	High	High	High	High	Not Found	High		0		0
High	Master Protein	A0A072V3G0	Branched-chain-amino-acid aminotransferase OS=Medicago truncatula GN=MTR_3g103580 PE=3 SV=1	0	33.693	26	6	6	6	1	387	42.3	7.02	27.26	6	Not Found	Not Found	Not Found	High	High	High	Not Found	High	Phospho [T283; S290; S295]	3	Phospho [T283; S290; S295]	0
High	Master Protein	G7IYM7	Aicarft/IMPCHase bienzyme family protein OS=Medicago truncatula GN=MTR_3g013710 PE=3 SV=1	0	33.66	10	4	7	4	1	594	64.5	6.8	33.14	4	Not Found	Not Found	Not Found	High	High	High	High	High		0		0
High	Master Protein	G7K6A4	ATP-dependent zinc metalloprotease FTSH protein OS=Medicago truncatula GN=MTR_5g069780 PE=3 SV=1	0	33.582	15	8	9	6	1	793	86.3	7.28	34.15	8	Not Found	Not Found	High	High	Not Found	High	Not Found	High		0		0
High	Master Protein	I3SQF1	Photosystem I reaction center subunit X psaK OS=Medicago truncatula GN=MTR_1g026820 PE=2 SV=1	0	33.58	43	4	27	4	1	130	13.3	10.36	86.89	4	High	High	High	High	High	High	High	High	Carboxymethyl [C109]; Deamidated [R78; Q94]	0		0
High	Master Protein	A0A072UVK3	AAA-type ATPase family protein OS=Medicago truncatula GN=MTR_4g053350 PE=3 SV=1	0	33.568	19	6	6	2	1	435	48.5	7.8	24.27	6	Not Found	Not Found	High	Not Found	High	Not Found	Not Found	Not Found		0		0
High	Master Protein	A0A072TX38	Alpha-1,4-glucan-protein synthase [UDP-forming]-like protein OS=Medicago truncatula GN=MTR_7g015970 PE=4 SV=1	0	33.545	32	9	14	7	1	360	40.7	5.96	49.24	9	Not Found	Not Found	High	Not Found	High	High	High	High		0		0
High	Master Protein	G7IQ36	Geranylgeranyl pyrophosphate synthase OS=Medicago truncatula GN=MTR_2g027300 PE=2 SV=1	0	33.521	19	5	7	5	1	342	39.3	5.31	31.64	5	Not Found	High	Not Found	Not Found	High	Not Found	High	High		0		0
High	Master Protein	A0A072U056	Delta-1-pyrroline-5-carboxylate synthetase OS=Medicago truncatula GN=MTR_7g063650 PE=3 SV=1	0	33.497	7	3	5	2	1	714	77.6	7.42	25.18	3	Not Found	Not Found	Not Found	Not Found	Not Found	High	High	Not Found		0		0
High	Master Protein	G7JCA1	Zinc finger protein, putative OS=Medicago truncatula GN=MTR_3g108360 PE=4 SV=2	0	33.489	4	7	7	7	1	2469	275.6	5.91	21.98	7	Not Found	Not Found	High	Not Found	High	Not Found	High	High		0		0
High	Master Protein	A0A072V2M1	Farnesylcysteine lyase OS=Medicago truncatula GN=MTR_3g096675 PE=4 SV=1	0	33.488	15	6	10	6	1	499	54.9	6.54	42.69	6	High	Not Found	Not Found	High	High	High	High	High		0		0
High	Master Protein	G7JLA7	Alcohol dehydrogenase zinc-binding domain protein OS=Medicago truncatula GN=MTR_4g086400 PE=4 SV=1	0	33.463	12	5	5	5	1	633	68.6	8.9	23.53	5	Not Found	Not Found	High	Not Found	High	Not Found	High	High		0		0
High	Master Protein	A0A072TEX8	Glycoside hydrolase family 18 protein OS=Medicago truncatula GN=MTR_0443s0040 PE=3 SV=1	0	33.451	23	7	13	7	1	310	36	5.78	46.24	7	Not Found	Not Found	Not Found	High	High	High	High	High		0		0
High	Master Protein	I3SIM9	Transmembrane protein, putative OS=Medicago truncatula GN=MTR_8g447300 PE=2 SV=1	0	33.38	45	6	19	6	1	116	13.5	9.72	58.56	6	High	High	High	Not Found	High	High	High	High		0		0
High	Master Protein	G8A2A9	3-oxo-delta(4,5)-steroid 5-beta-reductase-like protein OS=Medicago truncatula GN=MTR_3g102760 PE=4 SV=1	0	33.367	26	7	8	4	1	390	43.9	5.26	34.23	7	Not Found	Not Found	High	Not Found	High	High	High	Not Found	Carboxymethyl [C276]	0		0
High	Master Protein	G7KQZ4	Membrane-anchored ubiquitin-fold protein 4 OS=Medicago truncatula GN=MTR_7g108180 PE=2 SV=2	0	33.355	57	5	9	5	1	120	13.1	8.59	40.44	5	Not Found	High	High	High	High	High	High	High		0		0
High	Master Protein	A0A072UND0	SEC12p-like protein OS=Medicago truncatula GN=MTR_4g084650 PE=4 SV=1	0	33.349	22	8	14	8	1	411	44.6	5.96	48.86	8	High	High	High	High	High	High	High	High		0		0
High	Master Protein	A0A072UN82	Serine/threonine-protein kinase OS=Medicago truncatula GN=MTR_4g091860 PE=3 SV=1	0	33.31	10	8	11	7	1	836	94.3	7.5	32.53	8	Not Found	High	Not Found	Not Found	Not Found	High	High	Medium		0		0
High	Master Protein	Q2HTN2	Basic 7S globulin-like protein OS=Medicago truncatula GN=MTR_7g113790 PE=3 SV=1	0	33.309	17	4	11	4	1	437	48.1	8.53	56.5	4	Not Found	Not Found	Not Found	High	High	High	High	High	Carboxymethyl [C379]	0		0
High	Master Protein	G7L491	Casein lytic proteinase B3 OS=Medicago truncatula GN=MTR_7g012820 PE=3 SV=2	0	33.267	7	6	8	2	1	978	110.2	6.68	26.64	6	Not Found	Not Found	Not Found	Not Found	Not Found	High	High	Not Found		0		0
High	Master Protein	A0A072VNR0	Sodium/hydrogen exchanger OS=Medicago truncatula GN=MTR_1g081900 PE=3 SV=1	0	33.257	14	7	16	7	1	541	59.6	7.84	53.03	7	Not Found	Not Found	High	High	High	High	High	High		0		0
High	Master Protein	A0A072VGT5	Vacuolar-sorting receptor OS=Medicago truncatula GN=MTR_2g437910 PE=4 SV=1	0	33.231	12	7	9	7	1	624	69.9	5.66	31.1	7	Not Found	High	High	Not Found	Not Found	High	High	High		0		0
High	Master Protein	G7I9V0	Heterotrimeric GTP-binding protein alpha subunit, putative OS=Medicago truncatula GN=MTR_1g015750 PE=4 SV=2	0	33.223	28	10	16	10	1	392	45.7	5.73	50.72	10	Not Found	High	High	High	High	High	High	High		0		0
High	Master Protein	A0A072U4J6	Tonoplast intrinsic protein OS=Medicago truncatula GN=MTR_7g103030 PE=3 SV=1	0	33.22	17	2	20	2	1	250	25.4	6.01	95.81	2	High	High	High	High	High	High	High	High	Deamidated [Q12]; Phospho [T10]	1	Phospho [T10]	0
High	Master Protein	G7L6M1	50S ribosomal protein L5P OS=Medicago truncatula GN=MTR_7g078800 PE=2 SV=1	0	33.194	37	7	10	7	1	268	29.3	9.88	42.45	7	High	Not Found	Not Found	Not Found	High	High	High	High		0		0
High	Master Protein	G7JB13	Serine/threonine-protein kinase OS=Medicago truncatula GN=MTR_3g107070 PE=3 SV=2	0	33.157	13	9	15	7	1	798	88.4	6.79	38.07	9	Not Found	Not Found	High	Not Found	Not Found	High	High	High		0		0
High	Master Protein	G7KKZ4	Vesicle transport V-SNARE protein amino-terminal protein OS=Medicago truncatula GN=MTR_6g012860 PE=2 SV=1	0	33.132	31	4	11	3	1	221	24.8	9.41	56.98	4	Not Found	Not Found	High	High	High	High	High	High		0		0
High	Master Protein	G7K2W1	TCP-1/cpn60 chaperonin family protein OS=Medicago truncatula GN=MTR_5g087560 PE=3 SV=1	0	33.096	22	11	14	11	1	561	60.2	6.39	36.65	11	Not Found	High	Not Found	High	High	High	Not Found	High		0		0
High	Master Protein	Q0GXX6	Auxin conjugate hydrolase OS=Medicago truncatula GN=IAR32 PE=2 SV=1	0	33.073	15	7	11	5	1	447	49	6.35	47.4	7	Not Found	High	Not Found	High	Not Found	High	High	High		0		0
High	Master Protein	A0A072UQU5	Endo-1,3-1,4-beta-D-glucanase-like protein OS=Medicago truncatula GN=MTR_4g117380 PE=4 SV=1	0	33.055	32	5	10	5	1	238	25.6	5.83	36.5	5	High	High	Not Found	Not Found	High	High	High	High		0		0
High	Master Protein	G7L8T3	Guanosine nucleotide diphosphate dissociation inhibitor OS=Medicago truncatula GN=MTR_8g088620 PE=2 SV=1	0	33.036	23	8	14	8	1	444	49.7	5.88	37.69	8	High	High	High	High	High	High	High	High		0		0
High	Master Protein	A2Q2X1	Aldehyde dehydrogenase OS=Medicago truncatula GN=MTR_2g034160 PE=3 SV=1	0	33.028	9	5	7	5	1	595	65.5	7.75	34.06	5	Not Found	Not Found	Not Found	Not Found	High	High	High	High		0		0
High	Master Protein	A0A072VPT5	Short-chain dehydrogenase TIC 32 OS=Medicago truncatula GN=MTR_1g100315 PE=4 SV=1	0	33.017	21	5	16	1	1	315	34.1	8.81	53.81	5	Not Found	Not Found	Not Found	Not Found	Not Found	Not Found	High	Not Found		0		0
High	Master Protein	A0A072VDL8	Glucan endo-1,3-beta-glucosidase-like protein OS=Medicago truncatula GN=MTR_1g022160 PE=3 SV=1	0	33.007	16	6	8	6	1	486	52	5.24	35.61	6	Not Found	Not Found	Not Found	High	High	High	High	High		0		0
High	Master Protein	G7JG73	RNA-binding (RRM/RBD/RNP motif) family protein OS=Medicago truncatula GN=MTR_4g070140 PE=4 SV=1	0	32.995	42	6	14	5	1	190	18.4	5.43	46.42	6	Not Found	High	Not Found	High	High	High	High	Not Found		0		0
High	Master Protein	G7IB50	Nup85 nucleoporin protein OS=Medicago truncatula GN=MTR_1g006690 PE=4 SV=2	0	32.992	8	4	5	4	1	710	80.1	6.19	19.47	4	Not Found	Not Found	High	High	Not Found	Not Found	Not Found	High		0		0
High	Master Protein	G7J4K8	RAB geranylgeranyl transferase alpha protein OS=Medicago truncatula GN=MTR_3g100110 PE=4 SV=1	0	32.936	10	5	5	5	1	705	80.3	6.7	21.94	5	Not Found	High	Not Found	Not Found	Not Found	Not Found	Not Found	High		0		0
High	Master Protein	G7JNS2	NAD-dependent aldehyde dehydrogenase family protein OS=Medicago truncatula GN=MTR_4g106510 PE=3 SV=1	0	32.88	17	7	11	6	1	503	54.3	5.43	39.16	7	High	Not Found	High	Not Found	High	High	High	High		0		0
High	Master Protein	G7IEW2	Beta-D-xylosidase-like protein OS=Medicago truncatula GN=MTR_1g106860 PE=4 SV=1	0	32.828	10	8	9	8	1	781	85.3	7.21	29.65	8	High	High	High	High	High	High	Not Found	Not Found		0		0
High	Master Protein	A0A072TWJ3	Plastocyanin-like domain protein OS=Medicago truncatula GN=MTR_8g007020 PE=4 SV=1	0	32.766	20	3	12	2	1	187	19.6	6.52	57.71	3	Not Found	High	High	High	Not Found	High	High	High		0		0
High	Master Protein	G7LIM1	Calcium ion-binding protein OS=Medicago truncatula GN=MTR_8g085780 PE=4 SV=1	0	32.642	11	7	10	7	1	573	66	8.4	28.63	7	Not Found	Not Found	Not Found	Not Found	High	Not Found	High	High		0		0
High	Master Protein	G7KUM3	Prolyl-tRNA synthetase family protein OS=Medicago truncatula GN=MTR_7g110660 PE=3 SV=2	0	32.629	9	5	6	5	1	616	69.5	6.42	26.37	5	Not Found	Not Found	High	Not Found	Not Found	Not Found	High	High		0		0
High	Master Protein	A0A072UJ52	Plant/T7A14-6 protein OS=Medicago truncatula GN=MTR_4g050050 PE=4 SV=1	0	32.607	22	7	11	7	1	193	21	7.87	37.99	7	Not Found	Not Found	High	High	High	High	High	Not Found		0		0
High	Master Protein	A0A072V2S3	Niemann-pick C1-like protein OS=Medicago truncatula GN=MTR_3g115450 PE=4 SV=1	0	32.605	7	9	17	9	1	1362	149	6.27	46.02	9	Not Found	Not Found	High	High	High	High	High	High	Phospho [S322]	1	Phospho [S322]	0
High	Master Protein	G7JES3	DnaJ-class molecular chaperone OS=Medicago truncatula GN=MTR_4g050420 PE=3 SV=1	0	32.596	12	6	13	6	1	416	46.1	6.35	43.19	6	Not Found	Not Found	High	High	High	High	High	Not Found		0		0
High	Master Protein	G7JTY4	LL-diaminopimelate aminotransferase OS=Medicago truncatula GN=MTR_4g092620 PE=3 SV=1	0	32.561	20	8	8	8	1	459	49.9	7.28	26.32	8	Not Found	Not Found	High	Not Found	High	High	High	High		0		0
High	Master Protein	I3SSX1	Proteasome subunit alpha type OS=Medicago truncatula GN=MTR_1g112250 PE=2 SV=1	0	32.546	30	6	7	6	1	237	26	4.75	27.94	6	Not Found	Not Found	High	High	High	High	High	Not Found		0		0
High	Master Protein	G7JQA8	Photosystem I assembly protein Ycf4 OS=Medicago truncatula GN=MTR_4g034770 PE=4 SV=2	0	32.54	12	6	16	4	1	474	53.3	4.48	47.09	6	Not Found	Not Found	High	High	High	High	High	High		0		0
High	Master Protein	G7JZV0	Tobamovirus multiplication protein 2A OS=Medicago truncatula GN=MTR_5g014080 PE=4 SV=1	0	32.516	23	5	11	4	1	289	32.3	5.03	47.44	5	High	Not Found	Not Found	High	Not Found	High	High	High		0		0
High	Master Protein	G7J7Y2	Small GTPase family RAB protein OS=Medicago truncatula GN=MTR_3g064390 PE=4 SV=1	0	32.505	34	6	10	3	1	200	21.8	7.28	35.52	6	Not Found	Not Found	Not Found	High	High	High	Not Found	Not Found		0		0
High	Master Protein	G7L3K0	DEAD-box ATP-dependent RNA helicase-like protein OS=Medicago truncatula GN=MTR_7g076820 PE=3 SV=2	0	32.496	13	5	5	5	1	523	59.7	8.54	24.06	5	Not Found	High	Not Found	Not Found	Not Found	High	Not Found	High		0		0
High	Master Protein	Q56H33	4-hydroxyphenylpyruvate dioxygenase OS=Medicago truncatula GN=HPD PE=2 SV=1	0	32.475	17	6	10	6	1	437	48.3	5.62	41.23	6	High	Not Found	High	High	High	High	High	Not Found		0		0
High	Master Protein	Q38JC8	Temperature-induced lipocalin OS=Medicago truncatula GN=TIL PE=2 SV=1	0	32.454	48	8	14	7	1	184	21.4	6.55	43.11	8	Not Found	High	High	High	High	High	High	High		0		0
High	Master Protein	G7K5K7	Matrix metalloproteinase OS=Medicago truncatula GN=MTR_5g036360 PE=3 SV=2	0	32.426	21	7	15	7	1	360	40.8	7.5	46.08	7	Not Found	Not Found	High	High	High	High	High	High		0		0
High	Master Protein	G7ZV05	Hexosyltransferase OS=Medicago truncatula GN=MTR_6g016380 PE=3 SV=1	0	32.407	15	7	9	6	1	555	63.7	8.34	36.15	7	Not Found	Not Found	Not Found	High	High	High	High	High		0		0
High	Master Protein	G7LCZ9	Serine carboxypeptidase S28 family protein OS=Medicago truncatula GN=MTR_8g076210 PE=4 SV=1	0	32.381	17	6	7	5	1	455	51	5.3	25.78	6	Not Found	High	High	Not Found	High	Not Found	Not Found	High		0		0
High	Master Protein	A0A072U0L0	Bacteriochlorophyll synthase, putative OS=Medicago truncatula GN=MTR_7g069210 PE=4 SV=1	0	32.302	13	5	16	5	1	377	40.8	7.77	60.79	5	High	Not Found	Not Found	Not Found	High	High	High	High	Deamidated [Q73]	0		0
High	Master Protein	G7L4W3	HEAT repeat 7A-like protein OS=Medicago truncatula GN=MTR_7g102430 PE=4 SV=2	0	32.298	3	5	6	5	1	1714	189.7	6.16	25.53	5	Not Found	Not Found	Not Found	High	High	High	Not Found	Not Found		0		0
High	Master Protein	G7IFI5	RAB GTPase-like protein A1D OS=Medicago truncatula GN=MTR_2g014990 PE=4 SV=1	0	32.153	40	9	20	1	1	217	24.2	5.53	59.45	9	Not Found	Not Found	Not Found	High	Not Found	Not Found	Not Found	Not Found		0		0
High	Master Protein	G7JK13	30S ribosomal protein S9P OS=Medicago truncatula GN=MTR_4g085580 PE=2 SV=1	0	32.146	51	10	23	5	1	143	16.4	10.15	54.95	10	Not Found	Not Found	Not Found	High	High	High	Not Found	High	Deamidated [R45]	0		0
High	Master Protein	G7KZD5	Ricin-type beta-trefoil lectin domain protein OS=Medicago truncatula GN=MTR_7g085240 PE=4 SV=2	0	32.137	13	5	9	5	1	373	42.6	7.58	37.16	5	Not Found	Not Found	Not Found	High	High	High	High	High		0		0
High	Master Protein	I3SPQ1	60S ribosomal protein L32-1 OS=Medicago truncatula GN=MTR_7g053180 PE=2 SV=1	0	32.134	23	3	7	3	1	133	15.6	10.77	32.93	3	Not Found	Not Found	High	Not Found	High	Not Found	High	High		0		0
High	Master Protein	G7J950	Eukaryotic translation initiation factor 3 subunit B OS=Medicago truncatula GN=MTR_3g105430 PE=3 SV=2	0	32.128	9	6	6	6	1	716	82.1	5.12	21.99	6	Not Found	Not Found	High	Not Found	High	Not Found	High	High		0		0
High	Master Protein	G7JAA1	4-alpha-glucanotransferase OS=Medicago truncatula GN=MTR_3g094840 PE=3 SV=2	0	32.098	14	5	6	5	1	573	64.4	6.2	30.28	5	Not Found	Not Found	Not Found	Not Found	High	High	High	High		0		0
High	Master Protein	G7L4U3	4-alpha-glucanotransferase DPE2 OS=Medicago truncatula GN=MTR_7g088740 PE=4 SV=2	0	32.085	9	5	5	5	1	981	113	5.83	23.38	5	Not Found	High	High	High	Not Found	High	Not Found	Not Found		0		0
High	Master Protein	A0A072THS2	Ribosomal protein OS=Medicago truncatula GN=MTR_0059s0060 PE=3 SV=1	0	32.077	21	7	12	7	1	359	39.4	8.88	41.45	7	Not Found	Not Found	Not Found	High	High	High	High	High		0		0
High	Master Protein	G7II91	NADH-ubiquinone oxidoreductase 24 kDa subunit, putative OS=Medicago truncatula GN=MTR_2g104110 PE=4 SV=1	0	32.009	17	6	14	6	1	251	28	7.44	47.36	6	Not Found	High	High	High	High	High	High	High		0		0
High	Master Protein	A0A072TNV5	K+-H+ exchange-like protein OS=Medicago truncatula GN=MTR_8g023500 PE=4 SV=1	0	31.988	32	8	10	8	1	284	32.3	9.26	28.53	8	Not Found	High	Not Found	High	High	High	High	High		0		0
High	Master Protein	G7L7J8	Lipoxygenase OS=Medicago truncatula GN=MTR_8g020970 PE=3 SV=1	0	31.917	11	8	10	8	1	927	104.7	7.84	27.63	8	Not Found	Not Found	High	High	Not Found	High	High	High		0		0
High	Master Protein	A0A072UH49	Carbohydrate-binding protein of the ER protein OS=Medicago truncatula GN=MTR_6g015795 PE=4 SV=1	0	31.913	11	6	13	5	1	658	72.7	8.56	54.4	6	Not Found	Not Found	High	High	High	High	High	High		0		0
High	Master Protein	G7IGG5	Adipocyte plasma membrane-associated-like protein OS=Medicago truncatula GN=MTR_2g042430 PE=4 SV=1	0	31.899	15	6	13	4	1	372	40.7	5.41	50.27	6	Not Found	Not Found	Not Found	High	High	High	High	High	Carboxymethyl [C81]	0		0
High	Master Protein	A0A072TVW4	SH3 domain protein OS=Medicago truncatula GN=MTR_8g100105 PE=4 SV=1	0	31.869	8	8	9	7	1	1182	127.7	5.44	27.51	8	Not Found	High	Not Found	High	Medium	Not Found	High	High		0		0
High	Master Protein	G7KE92	Cytochrome P450 family 71 protein OS=Medicago truncatula GN=MTR_5g070920 PE=3 SV=1	0	31.857	15	9	13	9	1	510	57.9	8.38	42.88	9	High	High	High	High	High	High	High	High		0		0
High	Master Protein	G7JK76	ATP-dependent Clp protease proteolytic subunit OS=Medicago truncatula GN=MTR_4g102000 PE=3 SV=2	0	31.854	18	5	10	5	1	320	35.8	9.23	39.59	5	Not Found	Not Found	High	Not Found	High	High	High	High		0		0
High	Master Protein	G7K2G6	Transmembrane protein, putative OS=Medicago truncatula GN=MTR_5g015280 PE=4 SV=1	0	31.834	15	5	6	5	1	485	54.7	9.66	22.9	5	Not Found	Not Found	High	High	High	Not Found	High	Not Found		0		0
High	Master Protein	G7KGI9	Cinnamyl alcohol dehydrogenase family protein OS=Medicago truncatula GN=MTR_5g031360 PE=4 SV=1	0	31.808	20	8	13	7	1	363	39	7.74	40.74	8	Not Found	Not Found	Not Found	High	High	High	High	High		0		0
High	Master Protein	A0A072U4Q3	Type II peroxiredoxin OS=Medicago truncatula GN=MTR_7g103610 PE=4 SV=1	0	31.793	23	4	12	4	1	237	25.9	9.32	45.48	4	Not Found	Not Found	High	Not Found	High	High	High	High		0		0
High	Master Protein	A0A072TS21	Lycopene beta/epsilon cyclase OS=Medicago truncatula GN=MTR_8g465870 PE=4 SV=1	0	31.781	11	6	12	6	1	579	64.4	7.2	44.1	6	Not Found	Not Found	Not Found	High	High	High	High	High		0		0
High	Master Protein	G7IAL5	60S ribosomal protein L36 OS=Medicago truncatula GN=MTR_1g100960 PE=3 SV=2	0	31.749	36	9	21	1	1	115	13	11.46	61.51	9	Not Found	Not Found	Not Found	Not Found	Medium	High	Not Found	High	Deamidated [R59]	0		0
High	Master Protein	G7J9Y9	Delta-1-pyrroline-5-carboxylate synthetase OS=Medicago truncatula GN=MTR_3g069080 PE=3 SV=2	0	31.708	13	7	12	6	1	715	77.7	6.87	37.03	7	Not Found	Not Found	High	High	High	High	High	High		0		0
High	Master Protein	G7KUR3	Sphingosine-1-phosphate lyase OS=Medicago truncatula GN=MTR_7g022310 PE=3 SV=1	0	31.689	16	7	11	7	1	541	59.3	8.12	42.31	7	High	Not Found	Not Found	High	High	High	High	High		0		0
High	Master Protein	A0A072UN66	Appr-1-P processing enzyme family protein OS=Medicago truncatula GN=MTR_4g082640 PE=4 SV=1	0	31.659	9	5	6	5	1	556	62	6.87	21.28	5	Not Found	Not Found	High	High	High	Not Found	High	Not Found		0		0
High	Master Protein	G7KES5	FAM63A-like protein, putative OS=Medicago truncatula GN=MTR_5g011090 PE=4 SV=1	0	31.616	13	8	11	8	1	737	81	4.53	35.92	8	Not Found	High	High	High	High	High	High	Not Found	Deamidated [Q403]	0		0
High	Master Protein	G7L971	Pectinesterase OS=Medicago truncatula GN=MTR_8g023150 PE=4 SV=1	0	31.594	16	8	12	8	1	582	63.8	7.66	34.42	8	Not Found	High	High	High	High	High	Medium	High		0		0
High	Master Protein	A0A072U2B7	Transducin/WD40 repeat protein OS=Medicago truncatula GN=MTR_7g088540 PE=4 SV=1	0	31.539	20	8	9	8	1	453	49.7	6.37	27.99	8	Not Found	Not Found	High	High	High	Medium	High	High		0		0
High	Master Protein	G7J5F4	Pantothenate kinase OS=Medicago truncatula GN=MTR_3g077740 PE=4 SV=1	0	31.527	13	11	13	11	1	893	98.9	5.82	36.9	11	Not Found	Not Found	High	High	High	Not Found	High	High		0		0
High	Master Protein	A0A072V9M3	Elongation factor 1-beta OS=Medicago truncatula GN=MTR_2g461200 PE=3 SV=1	0	31.493	22	6	13	1	1	256	28.1	4.48	41.28	6	Not Found	Not Found	Not Found	High	Not Found	Not Found	Not Found	Not Found		0		0
High	Master Protein	A0A072UCA8	LRR receptor-like kinase family protein OS=Medicago truncatula GN=MTR_6g470960 PE=4 SV=1	0	31.492	9	6	15	2	1	676	73.4	7.43	63.47	6	Not Found	Not Found	Not Found	High	High	Not Found	Not Found	Not Found		0		0
High	Master Protein	G7IAE3	Glutamyl-tRNA synthetase OS=Medicago truncatula GN=MTR_1g085150 PE=3 SV=1	0	31.476	10	9	11	9	1	735	82.9	8.32	32.71	9	High	High	High	High	High	High	Not Found	High		0		0
High	Master Protein	A0A072VBF8	Transmembrane protein, putative OS=Medicago truncatula GN=MTR_3g093690 PE=4 SV=1	0	31.349	19	7	10	7	1	349	39	9.76	39.21	7	Not Found	Not Found	High	High	High	High	High	High		0		0
High	Master Protein	G7IY62	Uridine kinase OS=Medicago truncatula GN=MTR_3g061030 PE=3 SV=1	0	31.31	16	5	5	5	1	476	53.5	6.4	23.21	5	Not Found	Not Found	Not Found	High	High	High	Not Found	High		0		0
High	Master Protein	A0A072VF72	Scythe protein ubiquitin-like domain protein OS=Medicago truncatula GN=MTR_1g026290 PE=4 SV=1	0	31.3	8	6	7	6	1	983	102.9	5.31	26.52	6	Not Found	High	High	High	High	Not Found	High	Not Found		0		0
High	Master Protein	Q2HUL4	Short-chain dehydrogenase/reductase OS=Medicago truncatula GN=MTR_7g083870 PE=2 SV=1	0	31.297	23	5	10	5	1	301	31.8	7.75	43.01	5	Not Found	Not Found	Not Found	Not Found	High	High	High	High		0		0
High	Master Protein	G7IDA8	Regulator of Vps4 activity in the MVB pathway protein OS=Medicago truncatula GN=MTR_1g110690 PE=4 SV=2	0	31.279	28	6	7	6	1	326	36.2	7.14	30.68	6	Not Found	Not Found	High	High	High	High	Not Found	Not Found		0		0
High	Master Protein	A0A072U0I0	Calmodulin-domain kinase CDPK protein OS=Medicago truncatula GN=MTR_7g068710 PE=4 SV=1	0	31.236	8	6	15	3	1	530	59.9	6.46	48.04	6	Not Found	High	High	Not Found	Not Found	High	High	Not Found		0		0
High	Master Protein	G7LDG5	Malic enzyme OS=Medicago truncatula GN=MTR_8g009500 PE=3 SV=1	0	31.213	13	6	8	6	1	628	70	5.87	24.03	6	High	High	Not Found	Not Found	High	High	High	Not Found		0		0
High	Master Protein	G7JDJ4	Aconitate hydratase OS=Medicago truncatula GN=MTR_4g048190 PE=3 SV=1	0	31.195	12	12	29	2	1	979	107.3	7.59	70.55	12	Not Found	Not Found	Not Found	Medium	Medium	High	Not Found	Not Found		0		0
High	Master Protein	A0A072UXB1	Translation elongation factor EF1B, gamma chain OS=Medicago truncatula GN=MTR_3g058940 PE=4 SV=1	0	31.151	17	7	17	1	1	419	47.7	6.37	41.07	7	Not Found	Not Found	Not Found	Not Found	High	Not Found	Not Found	Not Found		0		0
High	Master Protein	G7IHU2	Cyclin-like protein OS=Medicago truncatula GN=MTR_2g098850 PE=4 SV=1	0	31.104	8	7	9	6	1	969	107.7	7.36	25.57	7	Not Found	Not Found	High	High	High	High	High	Not Found		0		0
High	Master Protein	G7ID84	Long chain acyl-CoA synthetase 7, peroxisomal protein OS=Medicago truncatula GN=MTR_1g104810 PE=4 SV=1	0	31.049	14	8	12	8	1	697	77	7.24	41.62	8	Not Found	High	High	High	High	High	High	High		0		0
High	Master Protein	A0A072URW1	60S ribosomal protein L7 OS=Medicago truncatula GN=MTR_4g008160 PE=4 SV=1	0	30.988	34	9	31	4	1	243	28.4	9.82	77.39	9	High	High	High	High	High	High	High	High		0		0
High	Master Protein	A0A072UNB8	Dynamin 3A-like protein OS=Medicago truncatula GN=MTR_4g093750 PE=3 SV=1	0	30.972	11	7	11	4	1	718	78.4	7.42	34.24	7	Not Found	High	High	Not Found	Not Found	High	High	High		0		0
High	Master Protein	G7L4P7	Uncharacterized protein OS=Medicago truncatula GN=MTR_7g077860 PE=4 SV=1	0	30.971	26	5	6	5	1	317	35.2	4.72	32.21	5	Not Found	High	Medium	High	High	High	Not Found	Not Found		0		0
High	Master Protein	A2Q4U9	C2 OS=Medicago truncatula GN=MTR_7g092770 PE=4 SV=1	0	30.953	12	8	9	8	1	775	89.4	9.1	35.09	8	Not Found	High	Not Found	High	Not Found	Not Found	High	High		0		0
High	Master Protein	G7L7L3	Subtilisin-like serine protease OS=Medicago truncatula GN=MTR_8g021130 PE=4 SV=1	0	30.936	7	4	5	4	1	785	83.8	6.83	24.02	4	Not Found	Not Found	Not Found	High	High	High	Not Found	High		0		0
High	Master Protein	G7IWN4	Cellulose synthase OS=Medicago truncatula GN=MTR_3g030040 PE=3 SV=1	0	30.896	9	7	8	4	1	1078	120.8	7.52	20.96	7	Not Found	High	High	Not Found	High	High	Not Found	Not Found		0		0
High	Master Protein	G7KIQ1	60S ribosomal protein L31B OS=Medicago truncatula GN=MTR_6g091630 PE=2 SV=1	0	30.866	42	5	8	5	1	121	13.9	9.76	36.23	5	High	Not Found	Not Found	High	High	High	Not Found	High		0		0
High	Master Protein	A0A072U4Q0	Pyruvate kinase OS=Medicago truncatula GN=MTR_6g004020 PE=3 SV=1	0	30.864	14	6	9	5	1	510	55.2	7.58	28.62	6	Not Found	Not Found	High	Not Found	High	High	High	Not Found		0		0
High	Master Protein	G7J3T3	Peroxisomal ABC transporter OS=Medicago truncatula GN=MTR_3g087350 PE=4 SV=2	0	30.861	7	9	13	9	1	1337	150.3	8.98	36.31	9	High	High	High	High	High	High	High	High		0		0
High	Master Protein	G7KN19	Plant/T32G24-2 protein OS=Medicago truncatula GN=MTR_6g084190 PE=4 SV=1	0	30.859	10	5	7	5	1	693	77.3	7.78	26.25	5	Not Found	Not Found	Not Found	High	High	High	High	Not Found		0		0
High	Master Protein	G7JAJ0	Clathrin assembly plant-like protein, putative OS=Medicago truncatula GN=MTR_3g106900 PE=4 SV=2	0	30.847	12	6	9	6	1	641	70.8	5.66	32.24	6	Not Found	High	Not Found	Not Found	High	High	High	Not Found		0		0
High	Master Protein	G7JJZ6	Surface antigen family protein, putative OS=Medicago truncatula GN=MTR_4g084320 PE=4 SV=1	0	30.842	28	5	11	5	1	201	22.5	9.11	37.71	5	High	Not Found	Not Found	Not Found	Not Found	High	High	High		0		0
High	Master Protein	G7II48	Heat shock 70 kDa protein OS=Medicago truncatula GN=MTR_2g102180 PE=3 SV=1	0	30.829	8	7	8	4	1	858	95.2	5.24	26.03	7	Not Found	Not Found	High	Not Found	Not Found	High	High	Medium		0		0
High	Master Protein	G7LIN4	Importin beta-3, putative OS=Medicago truncatula GN=MTR_8g085950 PE=4 SV=1	0	30.82	9	9	10	8	1	1117	123.1	4.83	34.94	9	Not Found	Not Found	High	High	High	High	High	High		0		0
High	Master Protein	G7LE92	1-aminocyclopropane-1-carboxylate deaminase, putative OS=Medicago truncatula GN=MTR_8g107670 PE=4 SV=1	0	30.773	19	5	5	5	1	388	42.3	7.06	22.53	5	Not Found	Not Found	High	High	High	Not Found	Not Found	High		0		0
High	Master Protein	A0A072VF59	CDSP32 protein (Drought-induced stress protein of 32 kDa) OS=Medicago truncatula GN=MTR_1g026125 PE=4 SV=1	0	30.702	12	4	9	4	1	298	33.7	6.68	32.7	4	Not Found	Not Found	High	High	High	Not Found	High	High		0		0
High	Master Protein	I3T4W9	Small GTPase family RAB protein OS=Medicago truncatula GN=MTR_1g094220 PE=2 SV=1	0	30.697	39	6	18	4	1	199	21.7	5.73	50.72	6	High	High	High	High	High	High	High	High		0		0
High	Master Protein	G7LF66	Heavy metal P-type ATPase OS=Medicago truncatula GN=MTR_8g012390 PE=3 SV=1	0	30.679	10	8	12	8	1	957	103	6.04	37.42	8	Not Found	Not Found	High	High	High	High	High	High		0		0
High	Master Protein	G7KRS8	Histone H2A OS=Medicago truncatula GN=MTR_7g108320 PE=2 SV=1	0	30.651	39	5	23	1	1	142	14.9	10.39	90.37	5	Not Found	Not Found	Not Found	Not Found	Not Found	High	High	High	Deamidated [Q121]	0		0
High	Master Protein	G7KAL0	Long-chain fatty acyl CoA ligase OS=Medicago truncatula GN=MTR_5g009360 PE=4 SV=1	0	30.641	14	9	16	1	1	662	73.9	7.08	38.14	9	Not Found	Not Found	Not Found	Medium	Not Found	Not Found	Not Found	Not Found		0		0
High	Master Protein	A0A072UQZ4	Pi-PLC X domain plant-like protein OS=Medicago truncatula GN=MTR_4g094820 PE=4 SV=1	0	30.628	17	5	7	5	1	428	46.7	7.31	28.12	5	High	Medium	Not Found	Not Found	Not Found	Not Found	High	High		0		0
High	Master Protein	G7JJY6	Beta-1,4-xylosyltransferase IRX10L-like protein, putative OS=Medicago truncatula GN=MTR_4g084200 PE=4 SV=1	0	30.623	19	6	13	6	1	481	54.7	8.41	52.84	6	Not Found	High	Not Found	High	High	High	High	High		0		0
High	Master Protein	G7JKI8	Uncharacterized protein OS=Medicago truncatula GN=MTR_4g133070 PE=2 SV=1	0	30.615	13	4	9	4	1	201	22.1	9.51	32.27	4	Not Found	High	High	High	Not Found	Not Found	Not Found	High	Deamidated [Q173]	0		0
High	Master Protein	A0A072U8G7	Serine/threonine-protein kinase OS=Medicago truncatula GN=MTR_6g043510 PE=3 SV=1	0	30.614	10	6	13	5	1	837	90.5	7.31	42.54	6	Not Found	High	Not Found	Not Found	High	High	High	High		0		0
High	Master Protein	G7IF53	UDP-glucuronic acid decarboxylase-like protein OS=Medicago truncatula GN=MTR_1g088480 PE=4 SV=1	0	30.597	19	8	10	7	1	430	48.3	8.22	35.97	8	High	High	High	High	High	Not Found	Not Found	High		0		0
High	Master Protein	G7ZUV5	1-cys peroxiredoxin PER1 OS=Medicago truncatula GN=MTR_7g105830 PE=4 SV=1	0	30.596	20	4	13	1	1	265	29	6.55	61.92	4	Not Found	Not Found	Not Found	Not Found	Not Found	High	High	High		0		0
High	Master Protein	G7IYF6	Cellulose synthase-like protein D3 OS=Medicago truncatula GN=MTR_3g005560 PE=3 SV=1	0	30.587	9	7	12	6	1	694	79.5	8.56	34.4	7	Not Found	High	High	Not Found	High	Medium	Not Found	Not Found		0		0
High	Master Protein	A0A072U7V2	Glucose-6-phosphate 1-dehydrogenase OS=Medicago truncatula GN=MTR_6g022860 PE=3 SV=1	0	30.577	18	8	10	5	1	518	59.3	7.09	32.47	8	Not Found	Not Found	High	Not Found	Not Found	High	High	High		0		0
High	Master Protein	G7KW77	Translocon-associated protein beta family-like protein OS=Medicago truncatula GN=MTR_7g083560 PE=2 SV=1	0	30.551	16	4	19	4	1	194	21	9.35	79.92	4	High	High	Not Found	High	High	High	High	High		0		0
High	Master Protein	G7KT01	Importin-like protein OS=Medicago truncatula GN=MTR_7g021500 PE=4 SV=2	0	30.528	6	5	7	4	1	1033	118.9	4.92	26.03	5	Not Found	Not Found	Not Found	High	High	High	High	High		0		0
High	Master Protein	A0A072U6E3	Sphingoid long-chain bases kinase-like protein OS=Medicago truncatula GN=MTR_6g004070 PE=4 SV=1	0	30.495	12	6	6	6	1	777	85.1	8.62	29.66	6	Not Found	High	Not Found	Not Found	Not Found	Not Found	High	High		0		0
High	Master Protein	G7KFG8	Calmodulin-domain kinase CDPK protein OS=Medicago truncatula GN=MTR_5g099240 PE=4 SV=1	0	30.489	10	4	9	4	1	559	62.9	6.06	46.06	4	Not Found	Not Found	High	High	High	High	High	High		0		0
High	Master Protein	A0A072U8T6	Mediator of RNA polymerase II transcription subunit 36a OS=Medicago truncatula GN=MTR_6g047580 PE=3 SV=1	0	30.475	28	7	12	3	1	309	32.6	10.02	40.68	7	Not Found	High	Not Found	Not Found	High	High	High	High		0		0
High	Master Protein	G7JQ45	AMP deaminase OS=Medicago truncatula GN=MTR_4g016980 PE=4 SV=1	0	30.443	14	11	13	10	1	835	95.1	6.7	34.8	11	Not Found	Not Found	Not Found	High	High	High	High	Not Found		0		0
High	Master Protein	G7JKS9	ARM repeat kinase family protein OS=Medicago truncatula GN=MTR_4g030910 PE=4 SV=2	0	30.435	9	5	9	5	1	928	100.9	7.93	33.35	5	Not Found	Not Found	Not Found	High	High	High	Not Found	High	Deamidated [Q641]	0		0
High	Master Protein	G7LAA5	UPF0548 plant-like protein OS=Medicago truncatula GN=MTR_8g074720 PE=4 SV=2	0	30.43	29	5	9	5	1	207	23.3	9.09	32.67	5	Not Found	Not Found	High	High	High	High	High	High		0		0
High	Master Protein	G7ZXE4	Sorbitol dehydrogenase-like protein OS=Medicago truncatula GN=MTR_6g465010 PE=4 SV=1	0	30.427	21	7	7	7	1	362	39	6.6	22.35	7	Not Found	High	High	High	Not Found	High	Not Found	High		0		0
High	Master Protein	G7I6C5	ABC-2 and plant PDR ABC-type transporter family protein OS=Medicago truncatula GN=MTR_1g011650 PE=3 SV=2	0	30.417	6	10	23	3	1	1447	164.1	7.91	66.84	10	Not Found	Not Found	High	High	Medium	Not Found	Not Found	Not Found		0		0
High	Master Protein	G8A2B2	3-oxo-delta(4,5)-steroid 5-beta-reductase-like protein OS=Medicago truncatula GN=MTR_3g102730 PE=2 SV=1	0	30.407	20	7	9	3	1	390	44.2	5.71	35.19	7	Not Found	Not Found	Not Found	Not Found	High	High	High	High	Carboxymethyl [C276]	0		0
High	Master Protein	A0A072UAP6	M48 family peptidase OS=Medicago truncatula GN=MTR_6g463380 PE=4 SV=1	0	30.394	14	7	11	7	1	534	59.4	9.6	38.8	7	Not Found	High	Medium	High	High	High	High	High		0		0
High	Master Protein	G7JST7	Transmembrane protein, putative OS=Medicago truncatula GN=MTR_4g078130 PE=4 SV=1	0	30.393	19	4	8	4	1	257	27.9	6.7	36.17	4	Not Found	Not Found	High	High	High	High	High	High		0		0
High	Master Protein	G7I7K2	Phytochrome-associated protein phosphatase type 2C OS=Medicago truncatula GN=MTR_1g013400 PE=3 SV=1	0	30.37	15	4	6	4	1	337	36.5	5.17	26.06	4	Not Found	High	Not Found	High	High	Not Found	High	High		0		0
High	Master Protein	A0A072V0V9	DPP6 amino-terminal domain protein OS=Medicago truncatula GN=MTR_3g088425 PE=4 SV=1	0	30.366	7	3	4	3	1	684	76.5	7.02	20.71	3	Not Found	Not Found	Not Found	Not Found	Not Found	Not Found	Not Found	High		0		0
High	Master Protein	I3RZQ6	Proteasome subunit alpha type OS=Medicago truncatula GN=MTR_1g022410 PE=2 SV=1	0	30.342	21	6	8	6	1	284	30.9	5.27	31.4	6	Not Found	High	Not Found	High	High	High	Not Found	High		0		0
High	Master Protein	G7JQT3	3-dehydroquinate dehydratase/shikimate dehydrogenase OS=Medicago truncatula GN=MTR_4g090620 PE=3 SV=2	0	30.33	15	5	6	5	1	507	55.7	5.73	28.09	5	Not Found	High	Not Found	Not Found	High	High	High	High	Deamidated [Q220]	0		0
High	Master Protein	G7IYH4	Monocopper oxidase SKS1-like protein OS=Medicago truncatula GN=MTR_3g008580 PE=4 SV=1	0	30.328	9	4	13	3	1	591	65.7	6.05	52.09	4	Not Found	Not Found	Not Found	Not Found	High	Not Found	High	High		0		0
High	Master Protein	Q5D875	Calcium-dependent kinase OS=Medicago truncatula GN=CDPK1 PE=2 SV=1	0	30.274	14	6	9	6	1	560	63.5	9.03	42.27	6	Not Found	High	Not Found	High	High	High	High	High	Phospho [S552]	1	Phospho [S552]	0
High	Master Protein	G7JCB1	Glucan endo-1,3-beta-glucosidase-like protein OS=Medicago truncatula GN=MTR_3g108600 PE=3 SV=2	0	30.265	12	5	7	4	1	470	51.3	6.77	28.34	5	Not Found	Not Found	Not Found	High	High	Not Found	High	High		0		0
High	Master Protein	G7JRQ5	Phospholipid scramblase OS=Medicago truncatula GN=MTR_4g077510 PE=3 SV=1	0	30.263	16	5	9	5	1	350	39.7	8.9	33.34	5	Not Found	High	Not Found	High	Not Found	High	High	High		0		0
High	Master Protein	A0A072UUM0	All-trans-retinol 13,14-reductase OS=Medicago truncatula GN=MTR_4g134780 PE=4 SV=1	0	30.218	13	6	8	6	1	579	63.1	7.06	26.94	6	Not Found	Not Found	Not Found	High	High	Not Found	High	High		0		0
High	Master Protein	G7JHG9	Alpha-1,4 glucan phosphorylase OS=Medicago truncatula GN=MTR_4g082950 PE=3 SV=2	0	30.203	8	8	10	4	1	981	111.9	5.17	28.65	8	Not Found	Not Found	High	High	High	Not Found	Not Found	Not Found		0		0
High	Master Protein	G7JAF8	ER membrane protein complex subunit-like protein OS=Medicago truncatula GN=MTR_3g106570 PE=2 SV=1	0	30.194	43	8	12	8	1	210	23.4	9.17	41.23	8	Not Found	Not Found	Not Found	High	High	High	High	High		0		0
High	Master Protein	G7K4H3	Multidrug resistance protein ABC transporter family protein OS=Medicago truncatula GN=MTR_5g094830 PE=4 SV=2	0	30.188	4	6	12	3	1	1495	166.8	5.88	44.86	6	Not Found	Not Found	Not Found	Not Found	Not Found	Not Found	High	High		0		0
High	Master Protein	G7INA2	DUF1682 family protein OS=Medicago truncatula GN=MTR_2g005930 PE=4 SV=2	0	30.152	14	6	8	6	1	468	52.8	6.71	29.4	6	Not Found	High	High	High	High	Not Found	Not Found	High		0		0
High	Master Protein	G7J9B1	Tonoplast monosaccharide transporter 2 OS=Medicago truncatula GN=MTR_3g118530 PE=3 SV=1	0	30.15	7	4	7	3	1	744	79.2	5.11	35.83	4	Not Found	Not Found	Not Found	Not Found	High	Not Found	High	High		0		0
High	Master Protein	G7KX95	Alpha-mannosidase OS=Medicago truncatula GN=MTR_7g084030 PE=3 SV=2	0	30.143	9	9	11	7	1	1061	120.8	6.13	37.04	9	Not Found	High	High	High	High	High	High	High		0		0
High	Master Protein	G7J5X6	Plastocyanin OS=Medicago truncatula GN=MTR_3g114850 PE=2 SV=1	0	30.109	28	2	10	2	1	167	17.1	5.16	64.77	2	Not Found	Not Found	High	High	High	High	High	High		0		0
High	Master Protein	G7JFX0	Ubiquinone biosynthesis protein UbiB OS=Medicago truncatula GN=MTR_4g026450 PE=4 SV=1	0	30.062	9	6	9	4	1	713	79.8	6.32	31.87	6	Not Found	Not Found	Not Found	High	High	High	High	Not Found		0		0
High	Master Protein	G7J0B8	Peroxisomal targeting signal 1 receptor OS=Medicago truncatula GN=MTR_3g009230 PE=4 SV=2	0	30.028	12	6	7	6	1	744	82.8	4.87	27.81	6	Not Found	Not Found	Not Found	High	Not Found	High	High	High	Deamidated [R510]	0		0
High	Master Protein	G7II39	BZIP protein OS=Medicago truncatula GN=MTR_2g102050 PE=4 SV=1	0	30.027	8	7	14	6	1	760	86.7	6.34	47.54	7	Not Found	High	Not Found	Not Found	High	High	High	High		0		0
High	Master Protein	A0A072U057	LIMR family protein OS=Medicago truncatula GN=MTR_7g068440 PE=4 SV=1	0	30.008	8	5	6	5	1	509	56.3	8.98	23.53	5	High	High	High	High	Not Found	Not Found	Not Found	Not Found		0		0
High	Master Protein	G7L754	Pectin acetylesterase OS=Medicago truncatula GN=MTR_8g072000 PE=3 SV=2	0	29.993	16	5	6	5	1	424	47.1	8.19	22.25	5	Not Found	Not Found	Not Found	High	High	High	High	High		0		0
High	Master Protein	G7ZWQ4	NADH dehydrogenase [ubiquinone] iron-sulfur protein OS=Medicago truncatula GN=MTR_8g010570 PE=3 SV=1	0	29.982	25	7	15	7	1	242	27.9	5.43	51.89	7	High	High	High	High	High	High	Not Found	Medium	Deamidated [R226]	0		0
High	Master Protein	G7JQG0	Cytochrome B561, amino-terminal protein OS=Medicago truncatula GN=MTR_4g060500 PE=4 SV=1	0	29.978	12	6	6	6	1	679	73.8	8.84	25.57	6	Not Found	Not Found	Not Found	High	High	Medium	Not Found	High		0		0
High	Master Protein	G7K574	Indole-3-acetic acid-amido synthetase OS=Medicago truncatula GN=MTR_5g016320 PE=4 SV=1	0	29.933	12	5	6	5	1	600	68.1	5.64	25.03	5	Not Found	Not Found	High	High	Not Found	High	Not Found	Not Found		0		0
High	Master Protein	A0A072VKS7	Alpha/beta fold hydrolase OS=Medicago truncatula GN=MTR_1g060150 PE=4 SV=1	0	29.894	25	7	11	4	1	376	42.4	7.97	41.45	7	Not Found	Not Found	Not Found	High	High	High	High	High		0		0
High	Master Protein	A0A072UX32	Aldo/keto reductase family oxidoreductase OS=Medicago truncatula GN=MTR_3g449790 PE=4 SV=1	0	29.854	22	9	15	9	1	366	40.2	8.91	44.07	9	High	High	Not Found	High	High	High	High	High		0		0
High	Master Protein	A0A072UQF6	Receptor-like kinase plant OS=Medicago truncatula GN=MTR_4g099130 PE=3 SV=1	0	29.831	19	8	20	4	1	379	42.9	9.42	52.65	8	Not Found	Not Found	High	High	High	High	Not Found	High		0		0
High	Master Protein	G7IPS9	DUF2921 family protein OS=Medicago truncatula GN=MTR_2g013640 PE=4 SV=2	0	29.789	10	7	8	7	1	937	106.3	8.97	27.54	7	Not Found	High	High	High	High	High	Not Found	High		0		0
High	Master Protein	A0A072VAB2	LEM3 (Ligand-effect modulator 3) family protein OS=Medicago truncatula GN=MTR_2g067760 PE=4 SV=1	0	29.783	5	2	5	2	1	348	38.9	9.07	26.32	2	Not Found	Not Found	Not Found	Not Found	Not Found	Not Found	High	High		0		0
High	Master Protein	G7J567	General regulatory factor 2 OS=Medicago truncatula GN=MTR_3g100620 PE=2 SV=1	0	29.745	30	7	24	5	1	252	28.4	4.77	54.4	7	High	High	High	High	High	High	High	High		0		0
High	Master Protein	G7JA48	DEAD-box ATP-dependent RNA helicase-like protein OS=Medicago truncatula GN=MTR_3g083690 PE=4 SV=1	0	29.745	14	6	6	5	1	613	65.7	7.84	25.57	6	Not Found	Not Found	Not Found	High	Not Found	High	High	Not Found		0		0
High	Master Protein	G7JHL9	LRR receptor-like kinase OS=Medicago truncatula GN=MTR_4g098740 PE=4 SV=2	0	29.703	16	7	10	6	1	498	55.9	6.34	35.85	7	Not Found	Not Found	Not Found	High	High	High	High	High		0		0
High	Master Protein	G7KEE9	Cytochrome P450 family 71 protein OS=Medicago truncatula GN=CYP83G1 PE=2 SV=2	0	29.657	11	4	4	4	1	506	57.7	8.28	21.5	4	Not Found	Not Found	Not Found	High	Not Found	Not Found	Not Found	High		0		0
High	Master Protein	A0A072TVC3	50S ribosomal protein L29 OS=Medicago truncatula GN=MTR_8g090185 PE=3 SV=1	0	29.608	39	6	8	6	1	168	19	10.15	34.03	6	High	High	Not Found	Not Found	Not Found	High	Not Found	High		0		0
High	Master Protein	G7L174	Transmembrane protein, putative OS=Medicago truncatula GN=MTR_7g057180 PE=4 SV=1	0	29.599	10	5	7	5	1	375	40.9	9.31	27.31	5	High	High	High	Not Found	Not Found	Not Found	Not Found	Not Found		0		0
High	Master Protein	A0A072VF27	ATRAD3-like protein OS=Medicago truncatula GN=MTR_1g024005 PE=4 SV=1	0	29.578	16	5	9	5	1	426	47.3	9.01	35.08	5	Not Found	Not Found	Not Found	High	High	High	High	High		0		0
High	Master Protein	G7JUE5	High chlorophyll fluorescence phenotype 173 protein OS=Medicago truncatula GN=MTR_4g005070 PE=4 SV=1	0	29.576	15	8	11	8	1	589	64.6	8.21	39.25	8	Not Found	High	High	High	High	Not Found	High	High		0		0
High	Master Protein	G7KRG6	Zinc finger CCCH domain protein OS=Medicago truncatula GN=MTR_7g079840 PE=4 SV=1	0	29.542	17	4	4	4	1	418	46	7.83	20.19	4	Not Found	Not Found	Not Found	High	Not Found	High	High	High		0		0
High	Master Protein	G7J6K1	Coatomer subunit gamma OS=Medicago truncatula GN=MTR_3g116480 PE=3 SV=1	0	29.527	7	6	9	2	1	887	98.6	5.21	28.4	6	Not Found	Not Found	Not Found	High	Medium	Medium	Not Found	Not Found		0		0
High	Master Protein	G7IR70	Ubiquitinyl hydrolase 1 OS=Medicago truncatula GN=MTR_2g081180 PE=3 SV=2	0	29.524	9	8	9	8	1	802	88.9	5.07	31.62	8	Not Found	High	Not Found	High	High	Not Found	High	High		0		0
High	Master Protein	G7L970	Alanine aminotransferase OS=Medicago truncatula GN=MTR_8g023140 PE=4 SV=1	0	29.477	9	3	6	3	1	524	58	6.54	26.05	3	Not Found	Not Found	High	Not Found	High	High	High	Not Found		0		0
High	Master Protein	A0A072TMW6	GPI transamidase component Gpi16 subunit-like protein OS=Medicago truncatula GN=MTR_8g013045 PE=4 SV=1	0	29.405	11	6	7	6	1	661	74.4	7.23	24.33	6	Not Found	High	High	High	High	High	High	High		0		0
High	Master Protein	G7KUQ1	LRR receptor-like kinase family protein OS=Medicago truncatula GN=MTR_7g022160 PE=4 SV=1	0	29.363	6	4	10	3	1	1016	112.5	6.77	38.63	4	Not Found	Not Found	Not Found	Not Found	High	Not Found	High	High		0		0
High	Master Protein	A0A072VHE7	Carboxypeptidase OS=Medicago truncatula GN=MTR_1g050545 PE=3 SV=1	0	29.302	15	5	7	5	1	496	55.1	5.58	29.83	5	Not Found	Not Found	Not Found	Not Found	Not Found	High	High	High	Deamidated [Q256]	0		0
High	Master Protein	G7JYH8	Uncharacterized protein OS=Medicago truncatula GN=MTR_5g066760 PE=4 SV=1	0	29.291	32	5	5	5	1	91	10	7.43	23.85	5	High	High	High	Not Found	Not Found	Not Found	Not Found	Not Found		0		0
High	Master Protein	G7LBX9	Protein transporter Sec61 subunit alpha-like protein OS=Medicago truncatula GN=MTR_8g058330 PE=3 SV=1	0	29.273	16	6	9	6	1	476	52.2	9	27.96	6	High	High	Not Found	High	High	High	High	Not Found		0		0
High	Master Protein	A0A072UU47	Glycoside hydrolase family 1 protein OS=Medicago truncatula GN=MTR_3g026400 PE=3 SV=1	0	29.246	15	8	8	7	1	512	58.2	9.17	28.07	8	Not Found	Not Found	High	Not Found	High	High	Not Found	High		0		0
High	Master Protein	G7JEA0	Trehalose-6-phosphate synthase domain protein OS=Medicago truncatula GN=MTR_4g129270 PE=4 SV=1	0	29.243	9	7	7	7	1	845	96.1	6.44	22.92	7	Not Found	High	Not Found	High	Not Found	High	High	Not Found		0		0
High	Master Protein	A0A072VJ38	Carotenoid isomerase OS=Medicago truncatula GN=MTR_1g054965 PE=4 SV=1	0	29.24	14	7	8	7	1	596	65.5	7.09	20.23	7	High	Not Found	Not Found	High	High	Not Found	High	High		0		0
High	Master Protein	A0A072V120	UTP-glucose-1-phosphate uridylyltransferase OS=Medicago truncatula GN=MTR_3g088650 PE=4 SV=1	0	29.237	15	7	9	7	1	600	66.1	6.62	32.49	7	Not Found	Not Found	High	High	High	Not Found	High	High		0		0
High	Master Protein	G7JVL8	30S ribosomal protein S15 OS=Medicago truncatula GN=rps15 PE=3 SV=1	0	29.236	56	7	15	7	1	91	10.8	10.42	50.11	7	Not Found	Not Found	Not Found	Not Found	Not Found	High	High	High		0		0
High	Master Protein	A0A072UQP0	Cytochrome P450 family protein OS=Medicago truncatula GN=MTR_4g102280 PE=3 SV=1	0	29.23	18	7	12	7	1	516	58.1	6.43	51.95	7	Not Found	Not Found	High	High	High	High	High	High		0		0
High	Master Protein	A0A072TI06	S-locus lectin kinase family protein OS=Medicago truncatula GN=MTR_0148s0080 PE=4 SV=1	0	29.223	7	8	17	7	1	1022	116.3	6	38.41	8	Not Found	High	High	High	High	High	High	Not Found		0		0
High	Master Protein	G7IS66	Dynamin 3A-like protein OS=Medicago truncatula GN=MTR_2g009690 PE=3 SV=1	0	29.175	10	7	11	4	1	824	90.7	6.39	32.45	7	Not Found	Not Found	High	High	High	Not Found	High	High		0		0
High	Master Protein	G7KYP9	Protein YIPF OS=Medicago truncatula GN=MTR_7g113620 PE=3 SV=1	0	29.143	20	4	7	4	1	282	31.2	7.2	28.49	4	Not Found	Not Found	Not Found	Not Found	High	High	High	High		0		0
High	Master Protein	A0A072TH02	Transmembrane protein, putative OS=Medicago truncatula GN=MTR_0121s0010 PE=4 SV=1	0	29.117	12	4	7	4	1	571	65.3	7.44	34.86	4	Not Found	Not Found	Not Found	Not Found	High	High	High	High		0		0
High	Master Protein	G7IQR6	Myosin family XI heavy chain OS=Medicago truncatula GN=MTR_2g062660 PE=3 SV=2	0	29.115	4	4	8	2	1	1565	179	7.21	33.84	4	Not Found	High	Not Found	High	Not Found	Not Found	Not Found	Not Found		0		0
High	Master Protein	G7K6R8	Ubiquinol oxidase OS=Medicago truncatula GN=MTR_5g026620 PE=3 SV=1	0	29.093	19	7	8	6	1	330	37.7	8.63	28.19	7	Not Found	Medium	High	High	Not Found	Not Found	Not Found	High		0		0
High	Master Protein	A0A072TZI8	GPI transamidase component PIG-S, related protein OS=Medicago truncatula GN=MTR_7g056117 PE=4 SV=1	0	29.09	16	7	7	7	1	590	66.2	5.72	24.67	7	High	High	High	Not Found	High	Medium	Not Found	High		0		0
High	Master Protein	A0A072UL78	Transmembrane protein, putative OS=Medicago truncatula GN=MTR_4g052500 PE=4 SV=1	0	29.069	12	4	6	4	1	539	60.7	7.18	32.94	4	High	Not Found	High	Not Found	High	High	High	High		0		0
High	Master Protein	G7JXE3	E3 ubiquitin-protein ligase HOS1 OS=Medicago truncatula GN=MTR_5g012940 PE=4 SV=2	0	29.066	7	5	6	5	1	960	108.4	6.6	28.73	5	Not Found	Not Found	High	High	Not Found	High	Not Found	Not Found		0		0
High	Master Protein	S4SZG4	Ribosomal protein S11 OS=Medicago truncatula GN=rps11 PE=3 SV=1	0	29.063	37	5	13	1	1	138	14.8	12.1	49.82	5	Not Found	Not Found	Not Found	Not Found	Not Found	High	Not Found	Not Found	Carboxymethyl [C130]	0		0
High	Master Protein	A0A072UG88	Aspartate aminotransferase OS=Medicago truncatula GN=MTR_4g011820 PE=4 SV=1	0	29.054	19	6	8	6	1	396	43.4	6.25	29.02	6	Not Found	High	High	High	High	High	Not Found	High		0		0
High	Master Protein	I3S3K3	Peptidyl-prolyl cis-trans isomerase OS=Medicago truncatula GN=MTR_3g463900 PE=2 SV=1	0	29.022	29	9	17	6	1	203	21.8	9.03	41.54	9	High	High	Not Found	Not Found	High	High	High	High		0		0
High	Master Protein	G7I2E2	Polyadenylate-binding protein OS=Medicago truncatula GN=MTR_1g019150 PE=3 SV=1	0	28.989	10	5	6	4	1	647	71.3	7.85	22.86	5	Not Found	Not Found	Not Found	High	High	Not Found	High	High	Deamidated [Q84]	0		0
High	Master Protein	G7KNP7	Short-chain alcohol dehydrogenase OS=Medicago truncatula GN=MTR_6g023910 PE=4 SV=1	0	28.97	16	5	11	3	1	270	28.7	6.1	41.24	5	Not Found	Not Found	High	Not Found	Not Found	Not Found	High	High		0		0
High	Master Protein	G7KFR6	Small GTPase family RAB protein OS=Medicago truncatula GN=MTR_5g076590 PE=4 SV=1	0	28.929	34	6	11	3	1	200	21.9	7.28	37.3	6	Not Found	Not Found	Not Found	High	High	High	Not Found	Not Found	Deamidated [R188; R194]	0		0
High	Master Protein	B7FJB1	Peptide methionine sulfoxide reductase family protein OS=Medicago truncatula GN=MTR_5g092680 PE=2 SV=1	0	28.915	20	5	10	5	1	265	29.4	8.4	35.45	5	Not Found	High	High	Not Found	High	High	High	High		0		0
High	Master Protein	G7JJ92	Multi-copper oxidase-like protein OS=Medicago truncatula GN=MTR_4g132320 PE=4 SV=1	0	28.875	12	5	12	4	1	545	61.5	9.67	43.82	5	Not Found	Not Found	Not Found	High	High	High	High	High		0		0
High	Master Protein	G7ZYG6	Sec1-family transporter OS=Medicago truncatula GN=MTR_4g094405 PE=3 SV=1	0	28.861	10	5	8	5	1	624	69.4	6.39	29.12	5	Not Found	Not Found	Not Found	Not Found	Not Found	High	High	High		0		0
High	Master Protein	G7INW2	Phosphatase 2C family protein OS=Medicago truncatula GN=MTR_2g008850 PE=4 SV=1	0	28.816	24	6	13	5	1	281	30.8	6.44	39.01	6	Not Found	Not Found	Not Found	High	High	High	High	High	Deamidated [Q193]	0		0
High	Master Protein	A0A072W1U6	Serine/threonine protein phosphatase 2A regulatory subunit A OS=Medicago truncatula GN=MTR_1g111270 PE=4 SV=1	0	28.787	8	5	9	4	1	587	65.4	5.07	32.13	5	Not Found	Not Found	Not Found	High	Not Found	High	High	High		0		0
High	Master Protein	A0A072VPF5	Alpha/beta fold hydrolase OS=Medicago truncatula GN=MTR_1g096200 PE=4 SV=1	0	28.725	12	6	8	4	1	575	64	8.4	25.61	6	Not Found	Not Found	Not Found	Not Found	High	High	High	Not Found		0		0
High	Master Protein	A0A072UQP6	UDP-glucose 6-dehydrogenase OS=Medicago truncatula GN=MTR_4g109360 PE=3 SV=1	0	28.7	16	7	10	5	1	478	52.6	6.58	29.38	7	Not Found	Not Found	Not Found	High	High	High	Not Found	High		0		0
High	Master Protein	G7JT56	Signal peptide peptidase A (SppA) 36 kDa type protein OS=Medicago truncatula GN=MTR_4g112860 PE=4 SV=2	0	28.69	7	4	6	2	1	659	73.3	9.36	25.88	4	Not Found	Not Found	Not Found	Not Found	High	Not Found	Not Found	Not Found		0		0
High	Master Protein	G7KQU5	Phospholipid/glycerol acyltransferase family protein OS=Medicago truncatula GN=MTR_7g104580 PE=4 SV=1	0	28.685	21	7	8	7	1	390	43.7	8.51	29.72	7	Not Found	High	High	Not Found	High	Not Found	Not Found	High		0		0
High	Master Protein	G7LC56	Transmembrane protein, putative OS=Medicago truncatula GN=MTR_8g075960 PE=4 SV=1	0	28.672	23	5	17	5	1	183	20.4	9.74	53.55	5	Not Found	Not Found	High	High	High	High	Not Found	Not Found	Deamidated [Q93; R94; Q104; Q105]	0		0
High	Master Protein	A0A072VYL9	Cytochrome P450 family 709 protein OS=Medicago truncatula GN=MTR_1g085680 PE=3 SV=1	0	28.598	13	5	6	5	1	518	59.4	8.79	25.12	5	Not Found	Not Found	High	Not Found	Not Found	Not Found	High	High		0		0
High	Master Protein	G7JXH3	FAD/NAD(P)-binding oxidoreductase family protein OS=Medicago truncatula GN=MTR_5g013260 PE=4 SV=1	0	28.577	11	4	9	3	1	439	48.6	8.92	34.9	4	Not Found	Not Found	Not Found	High	Not Found	High	High	High		0		0
High	Master Protein	G7KME8	Salt stress response/antifungal domain protein OS=Medicago truncatula GN=MTR_6g057680 PE=4 SV=1	0	28.575	12	5	11	4	1	510	57.5	6.52	33.66	5	Not Found	High	High	Not Found	Not Found	High	High	High		0		0
High	Master Protein	A0A072U7N8	ABC transporter family protein OS=Medicago truncatula GN=MTR_6g034230 PE=4 SV=1	0	28.557	5	5	7	3	1	1475	165.9	7.12	29.72	5	Not Found	Not Found	Not Found	Not Found	High	High	High	Not Found		0		0
High	Master Protein	A0A072VQ81	3-oxoacyl-(Acyl carrier) synthase II OS=Medicago truncatula GN=MTR_1g103020 PE=3 SV=1	0	28.546	8	4	8	3	1	472	50.1	8.09	36.67	4	Not Found	Not Found	Not Found	Not Found	High	High	High	High		0		0
High	Master Protein	A0A072VAN9	Photosystem II Pbs27 protein OS=Medicago truncatula GN=MTR_2g090200 PE=3 SV=1	0	28.524	24	6	10	6	1	170	18.7	9.94	39.83	6	Not Found	High	High	High	High	Not Found	Not Found	Not Found		0		0
High	Master Protein	G7LF65	Peptidylprolyl isomerase OS=Medicago truncatula GN=MTR_8g012380 PE=2 SV=1	0	28.523	27	4	5	4	1	151	16.5	7.94	24.04	4	Not Found	Not Found	High	High	High	High	Not Found	Not Found		0		0
High	Master Protein	A0A072UB28	RAB6-interacting protein, putative OS=Medicago truncatula GN=MTR_6g082800 PE=4 SV=1	0	28.51	19	7	7	7	1	508	58.3	4.94	23.19	7	Not Found	High	High	High	High	Not Found	Not Found	Not Found		0		0
High	Master Protein	G7ICA2	Glutamine-tRNA ligase OS=Medicago truncatula GN=MTR_1g110430 PE=3 SV=2	0	28.49	10	6	7	6	1	794	90.4	6.6	29.18	6	Not Found	Not Found	High	High	High	Not Found	High	Not Found		0		0
High	Master Protein	G7IU11	Phototropic-responsive NPH3 family protein OS=Medicago truncatula GN=MTR_5g016060 PE=3 SV=1	0	28.391	14	8	14	7	1	630	70.3	7.02	40.96	8	Not Found	High	High	High	High	High	High	High		0		0
High	Master Protein	A0A072UVM3	Glutathione S-transferase OS=Medicago truncatula GN=MTR_3g450790 PE=3 SV=1	0	28.383	27	5	8	5	1	215	24.8	6.32	26.15	5	Not Found	High	High	Not Found	High	High	Not Found	Not Found		0		0
High	Master Protein	A0A072TTK9	Alpha-glucan water dikinase OS=Medicago truncatula GN=MTR_8g069760 PE=4 SV=1	0	28.378	6	8	8	8	1	1483	165.1	6.62	24.91	8	High	High	High	High	High	High	Not Found	Not Found		0		0
High	Master Protein	G7LD00	Transmembrane protein, putative OS=Medicago truncatula GN=MTR_8g076220 PE=4 SV=1	0	28.373	17	5	20	5	1	282	31.8	10.17	73.25	5	High	High	High	High	High	High	High	High		0		0
High	Master Protein	G7KAQ8	Calmodulin-domain kinase CDPK protein OS=Medicago truncatula GN=MTR_5g009830 PE=4 SV=1	0	28.338	15	6	9	3	1	517	58.7	6.92	34.48	6	Not Found	Not Found	Not Found	High	High	Not Found	High	High		0		0
High	Master Protein	G7INL0	Cellulose synthase-like protein D3 OS=Medicago truncatula GN=MTR_2g037830 PE=3 SV=1	0	28.29	11	6	11	5	1	692	79.1	8.6	39.51	6	Not Found	Not Found	Not Found	High	High	High	High	High		0		0
High	Master Protein	G7KYM9	Lipoxygenase OS=Medicago truncatula GN=MTR_7g113410 PE=3 SV=2	0	28.281	10	7	11	4	1	867	98.3	6.16	42.79	7	Not Found	Not Found	High	High	High	High	High	Not Found		0		0
High	Master Protein	A0A072UKS9	RIP metalloprotease RseP OS=Medicago truncatula GN=MTR_4g048590 PE=4 SV=1	0	28.274	13	7	27	7	1	448	48.3	9.38	80.45	7	High	High	High	High	High	High	High	High		0		0
High	Master Protein	G7ILF2	60S ribosomal protein L26-1 OS=Medicago truncatula GN=MTR_2g012450 PE=2 SV=1	0	28.248	49	9	26	3	1	146	16.7	11.15	84.46	9	Not Found	Not Found	Medium	High	High	High	High	High		0		0
High	Master Protein	Q6WNR0	Isoflavone 2'-hydroxylase OS=Medicago truncatula GN=CYP81E7 PE=1 SV=1	0	28.223	11	6	13	6	1	498	57.6	8.78	43.08	6	Not Found	Not Found	Not Found	High	High	High	High	High		0		0
High	Master Protein	G7L742	Periplasmic polyamine-binding protein, putative OS=Medicago truncatula GN=MTR_8g071820 PE=4 SV=2	0	28.204	14	5	8	5	1	552	61.4	8.87	31.22	5	Not Found	Not Found	Not Found	High	High	High	High	Not Found		0		0
High	Master Protein	G7I999	Complex I subunit OS=Medicago truncatula GN=MTR_1g059290 PE=2 SV=1	0	28.19	43	4	14	4	1	112	12.4	5.5	63.62	4	Not Found	Not Found	High	High	High	High	High	High		0		0
High	Master Protein	A0A072VJQ4	Alpha/beta fold hydrolase OS=Medicago truncatula GN=MTR_1g060130 PE=4 SV=1	0	28.182	23	6	6	3	1	376	42.3	8.95	25.46	6	Not Found	Not Found	Not Found	Not Found	High	Not Found	Not Found	High		0		0
High	Master Protein	A0A072U7I5	NSP-interacting kinase-like protein OS=Medicago truncatula GN=MTR_7g018200 PE=3 SV=1	0	28.165	11	5	8	4	1	626	69.1	7.37	29.47	5	Not Found	Not Found	Not Found	High	Not Found	Not Found	Not Found	High		0		0
High	Master Protein	A0A072UGZ8	Late embryogenesis abundant protein OS=Medicago truncatula GN=MTR_5g088850 PE=4 SV=1	0	28.165	16	5	17	5	1	367	41.4	5.08	60.37	5	Not Found	Not Found	High	High	High	High	High	High		0		0
High	Master Protein	G7K5K1	Matrixin family protein OS=Medicago truncatula GN=MTR_5g036290 PE=3 SV=1	0	28.162	12	5	10	5	1	370	41.8	5.95	32.11	5	Not Found	Not Found	Not Found	High	High	High	High	High		0		0
High	Master Protein	G7IU57	Carbamoyl-phosphate synthase large chain OS=Medicago truncatula GN=MTR_2g093280 PE=3 SV=1	0	28.162	8	10	24	10	1	1166	127.5	5.45	60.8	10	Not Found	Not Found	High	High	High	High	High	High		0		0
High	Master Protein	B7FLW2	26S proteasome regulatory particle non-ATPase subunit 8 OS=Medicago truncatula GN=MTR_5g081980 PE=2 SV=1	0	28.125	17	4	5	4	1	310	35.1	6.15	17.75	4	Not Found	Not Found	High	Not Found	High	Not Found	High	Not Found		0		0
High	Master Protein	G7IPW7	alpha-1,2-Mannosidase OS=Medicago truncatula GN=MTR_2g019520 PE=3 SV=1	0	28.111	13	6	10	6	1	631	70.3	6.68	35.24	6	Medium	High	Not Found	Not Found	High	High	Medium	High		0		0
High	Master Protein	G7IE32	1-cys peroxiredoxin PER1 OS=Medicago truncatula GN=MTR_1g105090 PE=2 SV=2	0	28.107	20	4	13	1	1	267	29.2	6.4	58.64	4	Not Found	Not Found	Not Found	High	Not Found	High	High	High		0		0
High	Master Protein	G7J420	Xylulose kinase-like protein OS=Medicago truncatula GN=MTR_3g110710 PE=4 SV=1	0	28.094	11	6	9	6	1	557	61.2	6.8	32.81	6	High	High	High	High	High	High	Not Found	High		0		0
High	Master Protein	I3S543	Peptidyl-prolyl cis-trans isomerase OS=Medicago truncatula GN=MTR_4g073650 PE=2 SV=1	0	28.072	26	4	7	4	1	223	24.5	7.2	29.43	4	Not Found	Not Found	High	High	Not Found	High	High	High		0		0
High	Master Protein	G7ICU7	Long-chain fatty acyl CoA ligase OS=Medicago truncatula GN=MTR_1g086600 PE=4 SV=2	0	28.058	12	6	11	6	1	686	77.1	7.66	40.77	6	Not Found	Not Found	Not Found	High	High	High	High	High		0		0
High	Master Protein	A0A072UDN7	Cytoplasmic-like arginine-tRNA ligase OS=Medicago truncatula GN=MTR_6g088865 PE=3 SV=1	0	28.051	11	6	6	4	1	659	74.4	7.21	19.11	6	Not Found	Not Found	Not Found	High	High	Not Found	High	High		0		0
High	Master Protein	G7KY81	Transmembrane protein, putative OS=Medicago truncatula GN=MTR_7g074070 PE=4 SV=1	0	28.031	21	5	10	4	1	353	37.2	8.72	44.72	5	High	High	High	High	Not Found	High	High	Not Found		0		0
High	Master Protein	A0A072UVK2	ABC transporter A family protein OS=Medicago truncatula GN=MTR_3g437990 PE=4 SV=1	0	28.017	11	6	6	6	1	958	106.5	7.09	23.77	6	Not Found	Not Found	High	High	High	High	High	Not Found		0		0
High	Master Protein	B7FF18	ARO1-like protein 2 OS=Medicago truncatula GN=MTR_8g075770 PE=4 SV=1	0	28.001	11	5	6	5	1	667	72.8	7.69	23.63	5	Not Found	High	High	High	High	High	Not Found	Not Found		0		0
High	Master Protein	A0A072UPJ4	Cytochrome P450 family 71 protein OS=Medicago truncatula GN=MTR_4g104640 PE=3 SV=1	0	27.998	16	7	14	7	1	521	59.7	7.46	52.9	7	Not Found	High	High	High	High	High	High	High		0		0
High	Master Protein	B7FKB1	Nucleic acid-binding, OB-fold-like protein OS=Medicago truncatula GN=MTR_8g064590 PE=2 SV=1	0	27.97	24	3	5	3	1	136	15.2	8.4	24.59	3	Not Found	Not Found	High	Not Found	High	High	Not Found	Not Found		0		0
High	Master Protein	G7J360	Lysine ketoglutarate reductase trans-splicing protein OS=Medicago truncatula GN=MTR_3g086610 PE=4 SV=1	0	27.943	15	4	7	4	1	399	45.8	8.87	27.71	4	Not Found	Not Found	Not Found	High	High	Not Found	Not Found	High		0		0
High	Master Protein	G7JCY4	FkbM family methyltransferase OS=Medicago truncatula GN=MTR_4g114160 PE=4 SV=1	0	27.942	17	5	7	5	1	322	35.8	8.75	25.31	5	Not Found	High	High	High	Not Found	High	High	Not Found		0		0
High	Master Protein	G7IT36	Isocitrate dehydrogenase [NADP] OS=Medicago truncatula GN=MTR_2g062840 PE=2 SV=1	0	27.93	17	6	12	2	1	416	46.7	7.99	35	6	Not Found	Not Found	Not Found	Not Found	Not Found	High	High	High		0		0
High	Master Protein	G7J3G3	Peptidyl-tRNA hydrolase II (PTH2) family protein OS=Medicago truncatula GN=MTR_3g109700 PE=2 SV=1	0	27.91	27	4	5	4	1	193	21	9.61	20.07	4	Not Found	Not Found	High	Not Found	High	High	High	High		0		0
High	Master Protein	A0A072V0S0	Purple acid phosphatase OS=Medicago truncatula GN=MTR_3g074930 PE=3 SV=1	0	27.886	10	5	8	5	1	630	71.1	6.83	24.9	5	Not Found	Not Found	Not Found	High	High	High	High	High		0		0
High	Master Protein	A0A072URU9	Lectin receptor kinase OS=Medicago truncatula GN=MTR_4g105070 PE=4 SV=1	0	27.883	10	5	8	4	1	664	73.7	5.66	30.96	5	Not Found	Not Found	Not Found	High	High	High	Not Found	High		0		0
High	Master Protein	G7IFH4	Uncharacterized protein OS=Medicago truncatula GN=MTR_2g014890 PE=4 SV=1	0	27.851	12	7	8	7	1	614	68.6	6.07	23.07	7	Not Found	Not Found	High	Not Found	High	High	Not Found	High		0		0
High	Master Protein	G7L0U7	Plant/F20D21-34 protein OS=Medicago truncatula GN=MTR_7g114660 PE=4 SV=1	0	27.843	18	7	14	7	1	390	42.1	8.7	44.6	7	Not Found	High	High	High	High	High	High	High	Carboxymethyl [C261]	0		0
High	Master Protein	G7IYA2	Translocation protein Sec62 OS=Medicago truncatula GN=MTR_3g061490 PE=4 SV=1	0	27.843	14	6	11	6	1	364	41.9	6.96	38.21	6	Not Found	Not Found	Not Found	High	High	High	High	Medium		0		0
High	Master Protein	A0A072VRP6	Calcium-binding EF hand-like protein OS=Medicago truncatula GN=MTR_1g115135 PE=4 SV=1	0	27.838	12	5	14	5	1	369	43.4	5.06	39.65	5	Not Found	Not Found	High	High	High	High	High	High	Deamidated [Q320; Q321]	0		0
High	Master Protein	A0A072URB1	Amine oxidase OS=Medicago truncatula GN=MTR_4g117660 PE=3 SV=1	0	27.835	7	3	5	2	1	675	76.5	7.02	21.3	3	Not Found	Not Found	Not Found	Not Found	High	Not Found	Not Found	High		0		0
High	Master Protein	G7JG22	Proton-translocating NADH-quinone oxidoreductase, protein OS=Medicago truncatula GN=MTR_4g051300 PE=3 SV=1	0	27.818	6	4	8	4	1	786	89.3	9.04	21.6	4	Not Found	Not Found	Not Found	Not Found	Not Found	Medium	High	High		0		0
High	Master Protein	G7L6L4	Brassinosteroid insensitive 1-associated receptor kinase OS=Medicago truncatula GN=MTR_7g078730 PE=3 SV=1	0	27.814	20	8	14	7	1	491	54.3	7.31	39.45	8	Not Found	High	Not Found	High	High	Not Found	High	High		0		0
High	Master Protein	G7IA59	DEAD-box ATP-dependent RNA helicase-like protein OS=Medicago truncatula GN=MTR_1g061970 PE=4 SV=1	0	27.81	15	6	10	6	1	491	54.9	5.83	39.74	6	Not Found	High	High	High	High	High	High	Not Found	Deamidated [Q165]	0		0
High	Master Protein	A0A072TVB6	LRR receptor-like kinase OS=Medicago truncatula GN=MTR_8g090140 PE=3 SV=1	0	27.805	12	6	8	5	1	606	68	6.25	29.85	6	Not Found	Not Found	High	High	High	High	Not Found	Not Found		0		0
High	Master Protein	B7FMU8	Emp24/gp25L/p24 family protein OS=Medicago truncatula GN=MTR_3g072600 PE=2 SV=1	0	27.777	21	4	12	2	1	217	24.1	8.85	52.09	4	Not Found	Not Found	Not Found	Not Found	Not Found	High	High	High		0		0
High	Master Protein	A0A072U3D9	Guanylate-binding family protein OS=Medicago truncatula GN=MTR_7g096020 PE=4 SV=1	0	27.751	8	4	5	4	1	604	69.3	7.14	21.23	4	Not Found	Not Found	High	High	Not Found	Not Found	Not Found	High		0		0
High	Master Protein	A0A072UFK8	Hexosyltransferase OS=Medicago truncatula GN=MTR_7g115460 PE=3 SV=1	0	27.735	12	5	8	5	1	549	62.2	8.51	31.52	5	Not Found	High	High	High	High	High	Not Found	Not Found		0		0
High	Master Protein	G7JVK0	D-3-phosphoglycerate dehydrogenase OS=Medicago truncatula GN=MTR_4g005880 PE=3 SV=1	0	27.725	10	4	5	4	1	630	66.6	7.11	21.91	4	Not Found	Not Found	High	Not Found	High	High	High	High		0		0
High	Master Protein	B7FH51	60S ribosomal protein L27 OS=Medicago truncatula GN=MTR_2g006170 PE=2 SV=1	0	27.716	30	5	6	5	1	135	15.6	10.33	28.94	5	Not Found	Not Found	High	Not Found	High	High	Not Found	High		0		0
High	Master Protein	G7J5Q8	Serpin-ZX-like protein OS=Medicago truncatula GN=MTR_3g101010 PE=3 SV=1	0	27.714	23	8	10	8	1	389	42.7	5.87	28.91	8	Not Found	Not Found	High	High	High	High	High	High		0		0
High	Master Protein	G7KEH8	RPM1-interacting protein 4 (RIN4) family protein OS=Medicago truncatula GN=MTR_5g096030 PE=4 SV=1	0	27.713	58	3	9	3	1	76	8.4	8.48	45.64	3	Not Found	Not Found	High	High	Not Found	High	High	High	Phospho [S43]	1	Phospho [S43]	0
High	Master Protein	G7I6D5	Histone H2A OS=Medicago truncatula GN=MTR_1g011750 PE=2 SV=2	0	27.69	30	4	18	3	1	134	14.3	10.39	67.41	4	Not Found	High	Not Found	High	High	High	High	High		0		0
High	Master Protein	G7IRA1	40S ribosomal protein S20-2 OS=Medicago truncatula GN=MTR_1g091057 PE=2 SV=1	0	27.637	33	5	15	5	1	123	13.8	9.29	47.74	5	Medium	Not Found	Not Found	High	High	High	High	High		0		0
High	Master Protein	A0A072V6W9	Frigida interacting protein OS=Medicago truncatula GN=MTR_2g041690 PE=4 SV=1	0	27.623	20	5	8	5	1	356	40.4	7.14	29.56	5	Not Found	High	High	High	High	High	High	Not Found		0		0
High	Master Protein	G7K2A0	Kinase-associated protein phosphatase OS=Medicago truncatula GN=MTR_5g005810 PE=4 SV=1	0	27.601	12	6	7	6	1	583	65.6	6.02	24.72	6	Not Found	High	High	Not Found	High	High	High	Not Found		0		0
High	Master Protein	A0A072UEM3	Trafficking protein particle complex protein OS=Medicago truncatula GN=MTR_7g106380 PE=4 SV=1	0	27.583	6	6	8	6	1	1288	145.1	6.6	27.66	6	Not Found	High	High	Not Found	High	Not Found	High	High		0		0
High	Master Protein	G7JMM6	26S proteasome non-ATPase regulatory subunit 6 OS=Medicago truncatula GN=MTR_4g104080 PE=4 SV=1	0	27.557	17	7	13	7	1	387	44.7	5.59	34.99	7	High	High	Not Found	High	High	High	High	Medium		0		0
High	Master Protein	A0A072VHW6	UDP-glucosyltransferase family protein OS=Medicago truncatula GN=MTR_2g046620 PE=4 SV=1	0	27.554	15	5	5	4	1	467	53.3	7.14	21.47	5	Not Found	Not Found	Not Found	High	High	High	Not Found	Not Found		0		0
High	Master Protein	G7J8Z9	Sigma 54 modulation protein/S30EA ribosomal protein OS=Medicago truncatula GN=MTR_3g092720 PE=4 SV=2	0	27.534	16	5	8	5	1	353	40	9.23	34.09	5	Not Found	Not Found	High	High	High	High	Not Found	Not Found		0		0
High	Master Protein	A2Q2R1	Thioredoxin H2-like protein OS=Medicago truncatula GN=MTR_7g009070 PE=2 SV=1	0	27.531	28	4	16	4	1	134	14.8	5.88	62.52	4	Not Found	Not Found	High	High	High	High	High	High		0		0
High	Master Protein	Q0GXX4	Auxin conjugate hydrolase OS=Medicago truncatula GN=IAR34 PE=2 SV=1	0	27.515	11	4	7	4	1	447	49.1	6.3	34.56	4	Not Found	Not Found	High	High	Not Found	High	High	High		0		0
High	Master Protein	G7KKA7	Oligosaccharyltransferase subunit STT3 OS=Medicago truncatula GN=MTR_6g077750 PE=4 SV=1	0	27.513	6	5	11	5	1	727	81.6	8.87	39.53	5	Not Found	High	Not Found	High	High	High	High	High	Deamidated [R688]	0		0
High	Master Protein	G7K595	Proteasome subunit alpha type OS=Medicago truncatula GN=MTR_5g016590 PE=3 SV=1	0	27.506	23	5	11	5	1	250	27.3	7.09	42.86	5	Not Found	Not Found	High	High	High	High	High	High		0		0
High	Master Protein	G7J881	CDPK-related kinase OS=Medicago truncatula GN=MTR_3g092230 PE=4 SV=1	0	27.468	12	5	8	4	1	588	65.6	8.56	30.06	5	Not Found	Not Found	Not Found	High	High	Not Found	High	High		0		0
High	Master Protein	G7KWY5	2Fe-2S ferredoxin-like protein OS=Medicago truncatula GN=MTR_7g051230 PE=4 SV=1	0	27.468	30	4	10	4	1	154	17.2	7.85	36.86	4	Not Found	High	High	High	High	High	High	High		0		0
High	Master Protein	A0A072VZD2	Transmembrane protein, putative OS=Medicago truncatula GN=MTR_1g492600 PE=4 SV=1	0	27.462	25	3	13	3	1	157	17.6	6.3	43.89	3	High	High	High	High	High	High	High	High		0		0
High	Master Protein	A0A072UJM2	Calcium-dependent lipid-binding (CaLB domain) family protein OS=Medicago truncatula GN=MTR_4g033215 PE=4 SV=1	0	27.447	7	5	9	5	1	1044	119.9	9	35.84	5	High	Not Found	Not Found	High	High	High	Not Found	High		0		0
High	Master Protein	Q45FF2	Pyridoxal biosynthesis protein PDX1, putative OS=Medicago truncatula GN=MTR_2g017520 PE=2 SV=1	0	27.404	25	8	9	8	1	314	33.5	5.9	27.45	8	Not Found	Not Found	High	High	Not Found	High	Not Found	High		0		0
High	Master Protein	G7KZG9	Inosine-5'-monophosphate dehydrogenase OS=Medicago truncatula GN=MTR_7g085560 PE=3 SV=2	0	27.372	11	4	6	4	1	502	54	6.11	33.88	4	Not Found	High	High	High	High	High	High	Not Found		0		0
High	Master Protein	G7L049	Hexosyltransferase OS=Medicago truncatula GN=MTR_7g055600 PE=3 SV=1	0	27.335	15	6	10	3	1	434	50.3	8.72	31.56	6	Not Found	High	High	Not Found	High	High	Not Found	High		0		0
High	Master Protein	A0A072VDP0	Multi-copper oxidase-like protein OS=Medicago truncatula GN=MTR_3g115050 PE=4 SV=1	0	27.309	13	6	13	4	1	544	60.3	9.39	46.36	6	Not Found	Not Found	Not Found	Not Found	High	High	High	High		0		0
High	Master Protein	A0A072UV82	LRR and NB-ARC domain disease resistance protein OS=Medicago truncatula GN=MTR_3g435040 PE=3 SV=1	0	27.258	4	6	6	6	1	1618	184.3	5.58	20.15	6	Not Found	High	High	High	Not Found	Not Found	High	Not Found		0		0
High	Master Protein	G7I6Q7	3-isopropylmalate dehydratase, large subunit OS=Medicago truncatula GN=MTR_1g045750 PE=4 SV=1	0	27.253	15	6	11	6	1	505	55	7.23	35.94	6	Not Found	Not Found	High	High	High	High	High	Not Found		0		0
High	Master Protein	G7JRH3	Tetraspanin family protein OS=Medicago truncatula GN=MTR_4g061010 PE=3 SV=1	0	27.25	19	6	16	6	1	285	32.3	8.37	48.12	6	High	Not Found	High	High	High	High	High	High		0		0
High	Master Protein	G7L617	Cyclin delta-3, putative OS=Medicago truncatula GN=MTR_7g104350 PE=4 SV=1	0	27.218	13	5	6	5	1	344	38.3	6.55	18.15	5	Not Found	Not Found	Not Found	Not Found	High	High	Not Found	High		0		0
High	Master Protein	A0A072URV4	DEAD-box ATP-dependent RNA helicase-like protein OS=Medicago truncatula GN=MTR_4g105100 PE=3 SV=1	0	27.204	11	5	8	4	1	625	67.5	9.85	23.75	5	Not Found	Not Found	High	Not Found	Not Found	Not Found	High	High	Deamidated [Q266; R268]	0		0
High	Master Protein	G7L7C4	ATP-dependent 6-phosphofructokinase OS=Medicago truncatula GN=PFK PE=3 SV=1	0	27.2	14	5	7	2	1	475	52.3	7.56	22.92	5	Not Found	High	Not Found	Not Found	Not Found	High	Not Found	Not Found		0		0
High	Master Protein	G7ITZ9	Protein DETOXIFICATION OS=Medicago truncatula GN=MTR_2g088400 PE=3 SV=1	0	27.2	8	3	9	3	1	507	55.2	7.65	45.38	3	High	Not Found	High	High	High	High	High	High		0		0
High	Master Protein	G7K9T4	SecE/sec61-gamma subunit of protein translocation complex protein OS=Medicago truncatula GN=MTR_5g038520 PE=4 SV=1	0	27.183	21	3	4	3	1	159	17.5	5.01	27.77	3	Not Found	Not Found	High	High	Not Found	Not Found	Not Found	Not Found		0		0
High	Master Protein	G7K998	Phosphotransferase OS=Medicago truncatula GN=MTR_5g009000 PE=3 SV=1	0	27.182	11	4	8	4	1	496	53.9	7.12	31.1	4	Not Found	Not Found	Not Found	High	High	High	High	High		0		0
High	Master Protein	G7J8R1	M28 Zn-peptidase nicastrin OS=Medicago truncatula GN=MTR_3g065110 PE=4 SV=1	0	27.177	9	7	21	7	1	666	71.7	4.98	57.23	7	Not Found	High	High	High	High	High	High	High		0		0
High	Master Protein	G7IG01	Glucan endo-1,3-beta-glucosidase, basic protein OS=Medicago truncatula GN=MTR_2g034440 PE=3 SV=1	0	27.139	20	6	9	3	1	335	37.3	8.53	26.14	6	Not Found	Medium	Not Found	High	Not Found	Not Found	Not Found	High		0		0
High	Master Protein	G7JAC3	LRR receptor-like kinase family protein OS=Medicago truncatula GN=MTR_3g095100 PE=3 SV=1	0	27.139	6	8	10	8	1	1188	130.6	6.55	29.86	8	Not Found	Not Found	Not Found	High	High	High	High	Not Found		0		0
High	Master Protein	A0A072TZC5	Enoyl-acyl-carrier reductase OS=Medicago truncatula GN=MTR_7g053290 PE=4 SV=1	0	27.121	19	5	6	3	1	392	41.7	8.9	25.72	5	Not Found	Not Found	Not Found	High	High	High	Not Found	Not Found		0		0
High	Master Protein	A0A072TXQ7	ABC transporter-like family-protein OS=Medicago truncatula GN=MTR_8g015970 PE=4 SV=1	0	27.114	5	6	12	1	1	1296	144.4	7.3	33.65	6	Not Found	Not Found	Not Found	High	High	Not Found	High	High		0		0
High	Master Protein	G7IGG4	Adipocyte plasma membrane-associated-like protein OS=Medicago truncatula GN=MTR_2g042420 PE=4 SV=1	0	27.065	17	5	8	3	1	352	39	5.86	27.44	5	Not Found	Not Found	High	High	Not Found	Not Found	Not Found	High		0		0
High	Master Protein	A0A072VSW1	GDT1-like protein OS=Medicago truncatula GN=MTR_1g046730 PE=4 SV=1	0	27.034	14	3	6	3	1	365	38.6	7.75	29.77	3	High	High	High	Not Found	Not Found	Not Found	Not Found	Not Found		0		0
High	Master Protein	A0A072UB99	Uncoupling protein OS=Medicago truncatula GN=MTR_7g066690 PE=3 SV=1	0	27.024	21	6	19	2	1	305	32.4	9.42	50.15	6	Not Found	Not Found	Not Found	High	High	Not Found	Not Found	High		0		0
High	Master Protein	B7FI43	Caleosin OS=Medicago truncatula GN=MTR_1g032160 PE=2 SV=1	0	27.021	23	5	15	5	1	209	23.5	8.68	61.71	5	Not Found	Not Found	High	High	High	High	High	High		0		0
High	Master Protein	G7JIJ7	NOP56-like pre RNA processing ribonucleoprotein OS=Medicago truncatula GN=MTR_4g070910 PE=4 SV=1	0	26.998	8	4	5	4	1	553	61.4	9.1	20.5	4	Not Found	High	High	Not Found	High	Not Found	Not Found	High		0		0
High	Master Protein	A0A072UIU2	Heat shock cognate 70 kDa-like protein OS=Medicago truncatula GN=MTR_6g033820 PE=3 SV=1	0	26.991	14	9	12	9	1	679	75.4	6.2	32.1	9	Not Found	Not Found	High	High	High	High	Not Found	High		0		0
High	Master Protein	A0A072UMG5	Cytochrome P450 family flavone synthase OS=Medicago truncatula GN=MTR_4g088170 PE=3 SV=1	0	26.985	12	5	7	5	1	523	59.2	8.56	26.37	5	Not Found	Not Found	High	High	High	High	Not Found	High		0		0
High	Master Protein	A0A072VMV1	RAB GTPase-like protein C2B OS=Medicago truncatula GN=MTR_1g078200 PE=4 SV=1	0	26.971	29	7	19	3	1	224	25	5.53	59.18	7	Not Found	Not Found	Not Found	High	High	High	High	High		0		0
High	Master Protein	G7K9S8	Plant/T7N9-9 protein OS=Medicago truncatula GN=MTR_5g038460 PE=4 SV=1	0	26.95	19	4	4	4	1	372	41.4	7.88	20.47	4	Not Found	High	Not Found	Not Found	Not Found	High	Not Found	High		0		0
High	Master Protein	G7IQ90	Animal HSPA9 nucleotide-binding domain protein OS=Medicago truncatula GN=MTR_2g040160 PE=3 SV=1	0	26.949	3	5	14	2	1	1501	169.5	5.92	58.83	5	Not Found	Not Found	Not Found	High	High	High	High	High		0		0
High	Master Protein	G7JQF7	Acyl-CoA dehydrogenase OS=Medicago truncatula GN=MTR_4g060480 PE=2 SV=1	0	26.943	18	5	11	5	1	417	45.5	6.96	40.7	5	Not Found	Not Found	Not Found	High	High	High	High	High		0		0
High	Master Protein	G7IV12	Cellulose synthase-like protein OS=Medicago truncatula GN=MTR_3g060220 PE=3 SV=1	0	26.931	8	7	7	1	1	733	84.8	8.13	24.88	7	Not Found	Not Found	Not Found	High	Not Found	Not Found	Not Found	Not Found		0		0
High	Master Protein	G7IU67	Carboxypeptidase OS=Medicago truncatula GN=MTR_2g095750 PE=3 SV=1	0	26.924	12	4	5	4	1	511	57.3	5.53	21.18	4	Not Found	Not Found	High	High	High	High	Not Found	Not Found		0		0
High	Master Protein	A0A072URQ4	Ras GTPase-activating binding-like protein OS=Medicago truncatula GN=MTR_4g109640 PE=4 SV=1	0	26.917	14	5	5	5	1	461	50.1	5.62	15.18	5	Not Found	Not Found	High	Not Found	High	High	Not Found	High		0		0
High	Master Protein	G7I9F5	Syntaxin of plants protein OS=Medicago truncatula GN=MTR_1g083790 PE=3 SV=1	0	26.839	16	4	5	4	1	376	41.8	8.98	20.23	4	High	Not Found	High	Not Found	Not Found	Not Found	High	High		0		0
High	Master Protein	A0A072V0J3	Chalcone-flavonone isomerase family protein OS=Medicago truncatula GN=MTR_3g093980 PE=3 SV=1	0	26.823	25	5	9	5	1	229	26.1	5.02	39.58	5	Not Found	Not Found	Not Found	High	High	High	High	High		0		0
High	Master Protein	G7I3Y0	p-loop nucleoside triphosphate hydrolase superfamily protein OS=Medicago truncatula GN=MTR_1g075200 PE=4 SV=1	0	26.822	17	7	13	7	1	520	58.2	7.94	43.19	7	Not Found	Not Found	High	High	High	High	High	High		0		0
High	Master Protein	Q2HW07	Photosystem I reaction center subunit XI OS=Medicago truncatula GN=MTR_7g079900 PE=2 SV=1	0	26.763	11	4	21	4	1	214	22.9	9.41	77.87	4	High	High	Not Found	High	High	High	High	High		0		0
High	Master Protein	A0A072U5R2	Photosystem II reaction center PsbP family protein OS=Medicago truncatula GN=MTR_7g111880 PE=4 SV=1	0	26.757	25	4	6	4	1	250	28.4	8.54	26.28	4	Not Found	Not Found	High	Not Found	High	High	High	High		0		0
High	Master Protein	G7L5A1	Alpha amylase domain protein OS=Medicago truncatula GN=MTR_7g013300 PE=4 SV=2	0	26.727	7	5	6	5	1	962	109.2	6.29	21.7	5	Not Found	High	High	Not Found	Not Found	Not Found	Not Found	Not Found		0		0
High	Master Protein	G7J2J8	TGN-related, localized SYP41-interacting protein, putative OS=Medicago truncatula GN=MTR_3g086150 PE=4 SV=1	0	26.726	4	7	7	7	1	1822	205.5	4.73	20.96	7	High	High	High	High	Not Found	Not Found	Not Found	High		0		0
High	Master Protein	A0A072VD34	Malic enzyme OS=Medicago truncatula GN=MTR_3g110330 PE=3 SV=1	0	26.714	15	8	16	2	1	578	63.7	6.49	43.53	8	Not Found	Not Found	Not Found	Not Found	High	Not Found	Not Found	High		0		0
High	Master Protein	G7KA80	Endoplasmic reticulum vesicle transporter OS=Medicago truncatula GN=MTR_5g062720 PE=4 SV=1	0	26.7	13	3	5	3	1	386	43.5	6.24	23.76	3	Not Found	Not Found	Not Found	High	Not Found	High	High	High		0		0
High	Master Protein	G7JAT8	LRR receptor-like kinase OS=Medicago truncatula GN=MTR_3g084510 PE=3 SV=1	0	26.599	8	6	12	6	1	933	100.6	6.16	35.1	6	Not Found	Not Found	High	High	High	High	High	High		0		0
High	Master Protein	G7ITV2	Cellulose synthase-like protein OS=Medicago truncatula GN=MTR_2g087950 PE=3 SV=1	0	26.589	5	4	7	4	1	781	89	7.44	38.03	4	Not Found	Not Found	Not Found	High	High	High	High	High		0		0
High	Master Protein	G7LDY1	Sugar porter (SP) family MFS transporter OS=Medicago truncatula GN=MTR_8g077310 PE=3 SV=1	0	26.587	6	4	17	4	1	486	52.3	8.5	70.31	4	Not Found	Not Found	High	High	High	High	High	High		0		0
High	Master Protein	G7KXF8	Ras GTPase-activating binding-like protein OS=Medicago truncatula GN=MTR_7g098440 PE=4 SV=1	0	26.571	14	6	6	6	1	452	50.2	4.98	20.12	6	Not Found	High	High	Medium	High	Not Found	High	Not Found		0		0
High	Master Protein	A0A072UAS1	Sucrose synthase OS=Medicago truncatula GN=MTR_6g478030 PE=3 SV=1	0	26.561	4	5	7	3	1	1533	173.8	6.98	27.69	5	Not Found	Not Found	Not Found	Not Found	Not Found	High	High	High		0		0
High	Master Protein	G7KEK9	Glucose-1-phosphate adenylyltransferase OS=Medicago truncatula GN=MTR_5g097010 PE=3 SV=1	0	26.552	13	6	8	2	1	515	56.4	7.12	26.71	6	Not Found	Not Found	High	Not Found	High	Not Found	Not Found	Not Found		0		0
High	Master Protein	G7LF48	Disease resistance protein (TIR-NBS-LRR class) OS=Medicago truncatula GN=MTR_8g012200 PE=4 SV=1	0	26.546	7	5	7	5	1	1091	122.3	7.09	25.46	5	Not Found	Not Found	Not Found	Not Found	High	High	High	Not Found		0		0
High	Master Protein	B7FMB4	40S ribosomal protein S11-1 OS=Medicago truncatula GN=MTR_4g116410 PE=2 SV=1	0	26.536	26	8	24	2	1	160	17.8	10.56	59.1	8	High	High	Not Found	Not Found	Not Found	Not Found	Not Found	Not Found		0		0
High	Master Protein	G7J862	Rhodanese/cell cycle control phosphatase superfamily protein OS=Medicago truncatula GN=MTR_3g092040 PE=2 SV=1	0	26.525	33	8	18	8	1	232	26.1	8.87	56.82	8	High	Not Found	High	High	High	High	High	High	Deamidated [Q81]	0		0
High	Master Protein	G7INA7	ABA-responsive protein OS=Medicago truncatula GN=MTR_2g035220 PE=2 SV=1	0	26.49	41	6	11	5	1	157	16.6	5.07	39.97	6	High	High	High	High	High	High	Not Found	Not Found		0		0
High	Master Protein	G7IE72	RNase L inhibitor ABC domain protein OS=Medicago truncatula GN=MTR_1g114170 PE=4 SV=1	0	26.489	8	4	9	4	1	606	68.4	7.83	31.34	4	High	High	High	High	Not Found	High	High	Not Found		0		0
High	Master Protein	A0A072VB85	Disease resistance protein (CC-NBS-LRR class) family protein OS=Medicago truncatula GN=MTR_2g089975 PE=3 SV=1	0	26.479	2	4	5	1	1	3100	356.9	6.07	28.35	4	Not Found	Not Found	Not Found	Not Found	Not Found	Not Found	High	Not Found		0		0
High	Master Protein	G7JL78	Glycoprotein 3-alpha-L-fucosyltransferase A OS=Medicago truncatula GN=MTR_4g086010 PE=3 SV=1	0	26.476	14	5	6	5	1	504	56.6	6.86	21.02	5	Not Found	Not Found	High	High	High	High	Not Found	High	Deamidated [R139]	0		0
High	Master Protein	G7K162	Branched-chain-amino-acid aminotransferase OS=Medicago truncatula GN=MTR_5g014960 PE=3 SV=1	0	26.462	16	5	8	5	1	408	44.2	7.18	24.75	5	High	High	Medium	High	High	High	Not Found	Not Found		0		0
High	Master Protein	A0A072UTB1	Golgi SNAP receptor complex member 1 OS=Medicago truncatula GN=MTR_4g025850 PE=3 SV=1	0	26.453	21	3	6	3	1	240	26.7	9.51	29.52	3	Not Found	Not Found	Not Found	High	High	High	Not Found	Not Found		0		0
High	Master Protein	A0A072TYK3	Importin-alpha re-exporter, putative OS=Medicago truncatula GN=MTR_8g027450 PE=4 SV=1	0	26.409	5	3	4	3	1	969	108.6	5.29	22.29	3	Not Found	Not Found	High	High	Not Found	Not Found	Not Found	High		0		0
High	Master Protein	A0A072UXK7	NAD(P)H dehydrogenase B2 OS=Medicago truncatula GN=MTR_3g464380 PE=4 SV=1	0	26.387	8	3	6	3	1	504	56	9.01	27.96	3	Not Found	High	High	High	Not Found	Not Found	High	High		0		0
High	Master Protein	A0A072TWF8	60S ribosomal protein L2, related protein OS=Medicago truncatula GN=MTR_7g007070 PE=4 SV=1	0	26.37	25	4	8	4	1	208	22.6	11.22	33.48	4	Not Found	Medium	Not Found	High	High	High	Not Found	High		0		0
High	Master Protein	A0A072U2K5	Protein disulfide isomerase (PDI)-like protein OS=Medicago truncatula GN=MTR_8g064810 PE=4 SV=1	0	26.318	13	5	7	5	1	570	63.7	5.1	27.83	5	Not Found	High	Not Found	High	High	High	High	Not Found		0		0
High	Master Protein	G7KYV8	Leucine-rich receptor-like kinase family protein, putative OS=Medicago truncatula GN=MTR_7g009510 PE=4 SV=1	0	26.306	8	4	4	4	1	909	101	5.96	18.87	4	Not Found	Not Found	Not Found	Not Found	High	High	High	High		0		0
High	Master Protein	G7LB83	Alpha-mannosidase OS=Medicago truncatula GN=MTR_8g075330 PE=3 SV=1	0	26.287	4	3	5	1	1	1018	114.1	7.27	26.8	3	Not Found	Not Found	Not Found	Not Found	Not Found	Not Found	High	Not Found		0		0
High	Master Protein	G7JQK3	Beta-adaptin-like protein OS=Medicago truncatula GN=MTR_4g076210 PE=3 SV=1	0	26.238	8	5	5	5	1	896	99.5	5.08	19.66	5	High	Not Found	High	Not Found	Not Found	Not Found	Not Found	High		0		0
High	Master Protein	G7JBR8	Syntaxin of plants protein OS=Medicago truncatula GN=MTR_3g108160 PE=3 SV=1	0	26.232	24	6	7	6	1	336	37.1	9.04	23.58	6	Not Found	Not Found	High	High	High	High	Not Found	Not Found		0		0
High	Master Protein	A0A072UTN6	Phosphoinositide phosphatase SAC4 OS=Medicago truncatula GN=MTR_4g124630 PE=4 SV=1	0	26.201	9	5	7	5	1	844	96.5	6.48	25.94	5	Not Found	Not Found	Not Found	High	Not Found	High	High	High		0		0
High	Master Protein	G7K2L9	Thioredoxin reductase OS=Medicago truncatula GN=MTR_5g024900 PE=3 SV=1	0	26.145	15	4	5	4	1	376	40.2	7.31	22.93	4	Not Found	Not Found	High	High	High	Not Found	High	High		0		0
High	Master Protein	A0A072UY57	DEAD-box ATP-dependent RNA helicase OS=Medicago truncatula GN=MTR_3g467550 PE=3 SV=1	0	26.143	10	5	6	4	1	561	60.9	6.92	24.84	5	Not Found	Not Found	Not Found	High	High	High	High	Not Found		0		0
High	Master Protein	A0A072UY58	Dual specificity kinase splA-like protein OS=Medicago truncatula GN=MTR_4g082325 PE=3 SV=1	0	26.135	15	5	5	5	1	419	47.3	8	18.86	5	High	Not Found	Not Found	High	High	Not Found	Not Found	High		0		0
High	Master Protein	A0A072TT00	Xyloglucan endotransglucosylase/hydrolase OS=Medicago truncatula GN=MTR_8g081040 PE=3 SV=1	0	26.119	20	5	6	4	1	283	32.6	8.69	22.13	5	Not Found	Not Found	Not Found	Not Found	High	High	Not Found	High		0		0
High	Master Protein	G7JV64	Phototropic-responsive NPH3 family protein OS=Medicago truncatula GN=MTR_4g093850 PE=3 SV=1	0	26.108	12	7	7	7	1	669	75.5	7.71	22.09	7	High	Not Found	High	Not Found	High	High	Not Found	High		0		0
High	Master Protein	G7ISC8	Dephospho-CoA kinase OS=Medicago truncatula GN=MTR_2g014120 PE=3 SV=1	0	26.106	27	5	7	5	1	234	26.1	8.05	26.44	5	Not Found	Not Found	Not Found	High	High	High	High	High		0		0
High	Master Protein	G7IFA6	Cytochrome P450 family protein OS=Medicago truncatula GN=MTR_2g010330 PE=3 SV=1	0	26.097	17	5	6	3	1	508	58.3	8.37	32.45	5	Not Found	Not Found	Not Found	Not Found	Not Found	Not Found	High	High		0		0
High	Master Protein	A0A072VPX6	Cytochrome P450 family flavone synthase OS=Medicago truncatula GN=MTR_1g107295 PE=3 SV=1	0	26.085	16	8	10	8	1	528	60.4	7.72	32.6	8	Not Found	High	High	High	High	High	High	High		0		0
High	Master Protein	A0A072TFC5	Thylakoid lumenal 16.5 kDa protein OS=Medicago truncatula GN=MTR_0339s0030 PE=4 SV=1	0	26.077	24	4	9	4	1	234	25.3	9.23	35.12	4	Not Found	Not Found	Not Found	High	High	High	High	High		0		0
High	Master Protein	I3SMR8	Photosystem II biogenesis protein OS=Medicago truncatula GN=MTR_2g089795 PE=2 SV=1	0	26.065	15	4	7	4	1	287	32.6	8.34	33.44	4	Not Found	Not Found	High	High	High	High	Not Found	Not Found		0		0
High	Master Protein	G7L290	OPT family oligopeptide transporter OS=Medicago truncatula GN=MTR_7g028250 PE=4 SV=1	0	26.051	6	3	3	3	1	679	74.3	6.2	18.05	3	Not Found	Not Found	Not Found	High	Not Found	Not Found	Not Found	High		0		0
High	Master Protein	G7K7P5	RNA recognition motif OS=Medicago truncatula GN=MTR_5g088220 PE=4 SV=2	0	26.033	13	6	9	5	1	497	53.3	5.21	31.79	6	Not Found	Not Found	High	High	High	High	Not Found	High		0		0
High	Master Protein	A2Q3H4	Histone H2A OS=Medicago truncatula GN=MTR_7g114040 PE=2 SV=1	0	26.029	40	5	20	1	1	139	14.6	10.36	72.45	5	Not Found	Not Found	Not Found	Not Found	Not Found	Not Found	High	High		0		0
High	Master Protein	G7JU40	Serine/Threonine kinase family protein OS=Medicago truncatula GN=MTR_4g112900 PE=4 SV=1	0	26.019	21	5	8	5	1	342	38.1	6.76	31.26	5	High	High	High	High	High	High	Not Found	High		0		0
High	Master Protein	A0A072VIE8	1-acyl-sn-glycerol-3-phosphate acyltransferase-like protein OS=Medicago truncatula GN=MTR_1g052685 PE=4 SV=1	0	26.002	8	2	6	1	1	386	43.7	9.41	25.28	2	Not Found	Not Found	Not Found	Not Found	Not Found	Not Found	Not Found	High		0		0
High	Master Protein	A0A072UPC6	Endoplasmic reticulum vesicle transporter OS=Medicago truncatula GN=MTR_4g094255 PE=4 SV=1	0	25.982	17	6	9	6	1	384	43.4	6.86	38.11	6	Not Found	Not Found	High	Not Found	High	High	High	High		0		0
[truncated: 4,138 more rows]

## Sheet: URTLC 2nd
Protein FDR Confidence: Combined	Master	Accession	Description	Exp. q-value: Combined	Sum PEP Score	Coverage [%]	# Peptides	# PSMs	# Unique Peptides	# Protein Groups	# AAs	MW [kDa]	calc. pI	Score Sequest HT: Sequest HT	# Peptides (by Search Engine): Sequest HT	Found in Sample: [S9] F9: Sample	Found in Sample: [S10] F10: Sample	Found in Sample: [S11] F11: Sample	Found in Sample: [S12] F12: Sample	Found in Sample: [S13] F13: Sample	Found in Sample: [S14] F14: Sample	Found in Sample: [S15] F15: Sample	Found in Sample: [S16] F16: Sample	Modifications	Phospho (S; T; Y) Count	Phospho (S; T; Y) Positions	Acetyl (K) Count	Acetyl (K) Positions
[truncated: 5,738 more rows]

[truncated: 4 more sheets: URTLC 3rd, FACTLC 1st, FACTLC 2nd, FACTLC 3rd]
