# Supplementary material for: Improving the Identification and Coverage of Plant Transmembrane Proteins in Medicago Using Bottom–Up Proteomics
Source: Front Plant Sci. 2020 Dec 18;11:595726. doi: 10.3389/fpls.2020.595726 (PMC7775423; doi:10.3389/fpls.2020.595726)
Supplement: Supplementary file 7 [file Table_7.xlsx]

## Sheet: URTLC
Protein FDR Confidence: Combined	Master	Accession	Description	Exp. q-value: Combined	Sum PEP Score	Coverage [%]	# Peptides	# PSMs	# Unique Peptides	# AAs	MW [kDa]	calc. pI	Score Sequest HT: Sequest HT	# Peptides (by Search Engine): Sequest HT	Found in Sample: [S1] F1: Sample	Found in Sample: [S2] F2: Sample	Found in Sample: [S3] F3: Sample	Found in Sample: [S4] F4: Sample	Found in Sample: [S5] F5: Sample	Found in Sample: [S6] F6: Sample	Found in Sample: [S7] F7: Sample	Found in Sample: [S8] F8: Sample	Found in Sample: [S9] F9: Sample	Found in Sample: [S10] F10: Sample	Found in Sample: [S11] F11: Sample	Found in Sample: [S12] F12: Sample	Found in Sample: [S13] F13: Sample	Found in Sample: [S14] F14: Sample	Found in Sample: [S15] F15: Sample	Found in Sample: [S16] F16: Sample	Found in Sample: [S17] F17: Sample	Found in Sample: [S18] F18: Sample	Found in Sample: [S19] F19: Sample	Found in Sample: [S20] F20: Sample	Found in Sample: [S21] F21: Sample	Found in Sample: [S22] F22: Sample	Found in Sample: [S23] F23: Sample	Found in Sample: [S24] F24: Sample	# Protein Groups	Phospho (S; T; Y) Count	Phospho (S; T; Y) Positions	Acetyl (K) Count	Acetyl (K) Positions	Modifications
High	Master Protein	G7JPM2	Uro-adherence factor A, putative OS=Medicago truncatula GN=MTR_4g076030 PE=4 SV=1	0	916.857	69	101	391	101	1322	149.6	4.75	1830.67	101	High	High	High	High	High	High	High	High	High	High	High	High	High	High	High	High	High	High	High	High	High	High	High	High	1	1	Phospho [S51]	0		Deamidated [R37; Q1184]; Phospho [S51]
High	Master Protein	G7KFK1	Translocon at the inner envelope membrane ofs 110 protein OS=Medicago truncatula GN=MTR_5g074690 PE=4 SV=1	0	782.934	62	75	584	74	993	109.7	6.34	2505.36	75	High	High	High	High	High	High	High	High	High	High	High	High	High	High	High	High	High	High	High	High	High	High	High	High	1	0		0		Carboxymethyl [K219; K680; K926]; Deamidated [R218; Q683]
High	Master Protein	G7JKW2	MAR-binding filament-like protein, putative OS=Medicago truncatula GN=MTR_4g054960 PE=4 SV=1	0	741.383	63	73	430	73	768	86.7	5.48	1997.22	73	High	High	High	High	High	High	High	High	High	High	High	High	High	High	High	High	High	High	High	High	High	High	High	High	1	0		0		Deamidated [Q719; Q740]
High	Master Protein	G7JYP4	Vacuolar protein sorting protein OS=Medicago truncatula GN=MTR_5g013780 PE=4 SV=2	0	403.257	18	67	179	67	4324	484.9	5.88	682	67	Not Found	High	High	High	High	High	High	High	High	High	High	High	High	High	High	High	Not Found	High	High	High	High	High	High	High	1	1	Phospho [T3480]	0		Deamidated [R2525]; Phospho [T3480]
High	Master Protein	A0A072VEV1	Multidrug resistance protein ABC transporter family protein OS=Medicago truncatula GN=MTR_2g019020 PE=4 SV=1	0	596.301	42	58	380	57	1382	154.2	7.03	1742.02	58	High	High	High	High	High	High	High	High	High	High	High	High	High	High	High	High	High	High	High	High	High	High	High	High	1	0		0		Deamidated [R272; R540; R868]
High	Master Protein	A0A072UAG3	Oxidoreductase/transition metal ion-binding protein, putative OS=Medicago truncatula GN=MTR_6g053740 PE=4 SV=1	0	613.353	58	57	339	57	957	105.5	4.86	1668.48	57	High	High	High	High	High	High	High	High	High	High	High	High	High	High	High	High	High	High	High	High	High	High	High	High	1	2	Phospho [S189; S342]	0		Deamidated [Q164; Q362]; Phospho [S189; S342]
High	Master Protein	G7LGN1	Drug resistance transporter-like ABC domain protein OS=Medicago truncatula GN=MTR_8g014360 PE=3 SV=2	0	659.683	47	83	584	57	1308	147.1	7.3	2198.76	83	High	High	High	High	High	High	High	High	High	High	High	High	High	High	High	High	High	High	High	High	High	High	High	High	1	0		0		Deamidated [R229; R855]
High	Master Protein	G7L840	Import component Toc86/159, G and M domain protein OS=Medicago truncatula GN=MTR_8g088370 PE=4 SV=1	0	651.794	46	53	387	53	1387	149.3	4.41	1770.64	53	High	High	High	High	High	High	High	High	High	High	High	High	High	High	High	High	High	High	High	High	High	High	High	High	1	2	Phospho [S68; S395]	0		Deamidated [R834]; Phospho [S68; S395]
High	Master Protein	G7I7Q4	Heat shock protein 81-2 OS=Medicago truncatula GN=MTR_1g025430 PE=3 SV=1	0	477.207	51	55	392	52	818	94.1	4.89	1474.96	55	High	High	High	High	High	High	High	High	High	High	High	High	High	High	High	High	High	High	High	High	High	High	High	High	1	0		0		Deamidated [R354; Q406]
High	Master Protein	A0A072TYG3	Processing peptidase OS=Medicago truncatula GN=MTR_7g053330 PE=3 SV=1	0	643.748	69	50	681	50	532	59.6	6.93	3060.47	50	High	High	High	High	High	High	High	High	High	High	High	High	High	High	High	High	High	High	High	High	High	High	High	High	1	5	Phospho [T273; T310; T312; S436; S450]	0		Deamidated [R108; R158; Q203; Q257; Q268; Q272; Q313; Q434; R467; Q515]; Phospho [T273; T310; T312; S436; S450]
High	Master Protein	A0A072TUJ3	COP1-interactive protein, putative OS=Medicago truncatula GN=MTR_8g099275 PE=4 SV=1	0	339.178	43	48	100	48	1223	141.5	4.98	462.92	48	Not Found	High	High	High	High	High	High	High	High	High	High	High	High	High	High	High	High	High	High	High	High	High	High	High	1	0		0
High	Master Protein	Q1SKX2	70 kDa heat shock protein OS=Medicago truncatula GN=MTR_2g005690 PE=3 SV=1	0	474.976	55	50	355	48	707	75.7	5.34	1389.95	50	High	High	High	High	High	High	High	High	High	High	High	High	High	High	High	High	High	High	High	High	High	High	High	High	1	0		0		Deamidated [R115; Q119; Q217]
High	Master Protein	A0A072URM9	Archaeal/vacuolar-type H+-ATPase subunit A OS=Medicago truncatula GN=MTR_4g005410 PE=3 SV=1	0	633.259	68	48	520	48	624	68.7	5.34	2487.3	48	High	High	High	High	High	High	High	High	Not Found	High	High	High	High	High	High	High	High	High	High	High	High	High	High	High	1	0		0		Deamidated [R48; Q234; Q488; R489; Q607; R617; R624]
High	Master Protein	A0A072U549	Haloacid dehalogenase-like hydrolase family protein OS=Medicago truncatula GN=MTR_7g112140 PE=4 SV=1	0	418.806	44	47	278	47	1059	115.8	5.87	1098.4	47	Medium	High	High	High	High	High	High	High	Not Found	High	High	High	High	High	High	High	Not Found	High	High	High	High	High	High	High	1	0		0
High	Master Protein	G7KTM5	Carbohydrate-binding-like fold protein OS=Medicago truncatula GN=MTR_7g109730 PE=4 SV=2	0	398.929	40	46	286	46	1196	130.4	6.06	1259.5	46	Not Found	High	High	High	High	High	High	High	Not Found	High	High	High	High	High	High	High	Not Found	High	High	High	High	High	High	High	1	0		0		Carboxymethyl [K145]
High	Master Protein	A0A072V376	ATP-dependent zinc metalloprotease FTSH protein OS=Medicago truncatula GN=MTR_3g115110 PE=3 SV=1	0	537.356	49	46	637	46	706	75.6	5.85	2578.7	46	High	High	High	High	High	High	High	High	High	High	High	High	High	High	High	High	High	High	High	High	High	High	High	High	1	5	Phospho [S150; T247; T250; T546; S563]	0		Deamidated [Q153; Q242; Q259; Q462; Q541; Q568; Q637; R653; Q665]; Phospho [S150; T247; T250; T546; S563]; Carboxymethyl [K343; K638]
High	Master Protein	S4SZ10	Protein Ycf2 OS=Medicago truncatula GN=ycf2 PE=3 SV=1	0	223.696	24	46	159	46	1885	222.3	8.91	494.11	46	Not Found	High	High	High	High	High	High	High	Not Found	High	High	High	High	High	High	High	Not Found	High	High	High	High	High	High	High	1	0		0		Deamidated [Q1634]
High	Master Protein	A0A072VNB6	Uncharacterized protein OS=Medicago truncatula GN=MTR_1g084990 PE=4 SV=1	0	422.98	51	45	102	45	1133	123.9	4.23	518.09	45	High	High	High	High	High	High	High	Not Found	Not Found	High	High	High	High	High	Not Found	Not Found	High	High	High	High	High	Not Found	Not Found	Not Found	1	0		0
High	Master Protein	G7IED3	FZO-like protein OS=Medicago truncatula GN=MTR_1g072270 PE=4 SV=1	0	342.779	50	45	211	45	914	101.6	5.24	826.84	45	High	High	High	High	High	High	High	High	Not Found	High	High	High	High	High	High	High	High	High	High	High	High	High	High	High	1	0		0		Deamidated [Q302]
High	Master Protein	G7JCF2	Plastid transcriptionally active protein OS=Medicago truncatula GN=MTR_4g064750 PE=4 SV=2	0	456.527	61	44	414	44	553	59.9	8.24	1680.16	44	High	High	High	High	High	High	High	High	High	High	High	High	High	High	High	High	High	High	High	High	High	High	High	High	1	2	Phospho [T440; T491]	0		Deamidated [R95; Q317]; Phospho [T440; T491]
High	Master Protein	A0A072UTX7	Patellin-like protein OS=Medicago truncatula GN=MTR_4g033435 PE=4 SV=1	0	450.896	70	47	307	44	595	66.2	4.74	1367.58	47	High	High	High	High	High	High	High	High	High	High	High	High	High	High	High	High	High	High	High	High	High	High	High	High	1	1	Phospho [S88]	0		Phospho [S88]; Deamidated [Q470]
High	Master Protein	Q2HW53	Ferredoxin-dependent glutamate synthase OS=Medicago truncatula GN=MTR_7g089970 PE=4 SV=1	0	362.458	33	44	193	44	1612	175.7	6.86	818.94	44	High	High	High	High	High	High	High	High	Not Found	High	High	High	High	High	High	High	High	High	High	High	High	High	High	High	1	0		0		Deamidated [Q1023; Q1328]
High	Master Protein	G7L0M8	Endoplasmic reticulum [ER]-type calcium ATPase, putative OS=Medicago truncatula GN=MTR_7g100110 PE=3 SV=2	0	393.373	36	45	244	43	1072	117.7	5.4	1061.65	45	High	High	High	High	High	High	High	High	High	High	High	High	High	High	High	High	High	High	High	High	High	High	High	High	1	0		0		Carboxymethyl [K962]; Deamidated [Q225]
High	Master Protein	A0A072VRY1	Callose synthase-like protein OS=Medicago truncatula GN=MTR_1g116470 PE=4 SV=1	0	370.611	28	49	222	43	1897	218.3	8.68	958.1	49	High	High	High	High	High	High	High	High	High	High	High	High	High	High	High	High	High	High	High	High	High	High	High	High	1	1	Phospho [S777]	0		Phospho [S777]
High	Master Protein	G7JCF5	Translocon at the outer envelope membrane ofs protein 75-III OS=Medicago truncatula GN=MTR_4g064780 PE=4 SV=1	0	577.994	49	43	520	43	804	88	7.37	2611.06	43	High	High	High	High	High	High	High	High	Medium	High	High	High	High	High	High	High	High	High	High	High	High	High	High	High	1	0		0		Deamidated [Q377; Q493; R626; R799]
High	Master Protein	A0A0C3UMZ7	L-galactono-1,4-lactone dehydrogenase OS=Medicago truncatula GN=MTR_1g050360 PE=4 SV=2	0	405.85	58	43	368	43	603	68.9	8.54	1522.37	43	High	High	High	High	High	High	High	High	High	High	High	High	High	High	High	High	High	High	High	High	High	High	High	High	1	0		0		Deamidated [R143; R158]
High	Master Protein	G7IRB6	Proton pump interactor, putative OS=Medicago truncatula GN=MTR_2g085330 PE=4 SV=2	0	339.38	51	42	183	42	674	75.8	8.87	770.41	42	High	High	High	High	High	High	High	High	High	High	High	High	High	High	High	High	High	High	High	High	High	High	High	High	1	0		0
High	Master Protein	A0A072UG84	Embryo defective 3012 protein OS=Medicago truncatula GN=MTR_6g004840 PE=4 SV=1	0	253.8	21	42	179	42	1956	214.2	6.25	646.67	42	High	High	High	High	High	High	High	High	High	High	High	High	High	High	High	High	High	High	High	High	High	High	High	High	1	0		0		Deamidated [Q1839]
High	Master Protein	A0A072UZK8	Rhodanese/cell cycle control phosphatase superfamily protein OS=Medicago truncatula GN=MTR_3g084030 PE=4 SV=1	0	478.933	27	42	381	42	1350	148.1	9	1668.71	42	High	High	High	High	High	High	High	High	High	High	High	High	High	High	High	High	High	High	High	High	High	High	High	High	1	1	Phospho [S833]	0		Deamidated [Q828; Q1318; R1320]; Phospho [S833]
High	Master Protein	A0A072TFS9	ATP synthase F1, alpha subunit OS=Medicago truncatula GN=MTR_0212s0040 PE=3 SV=1	0	521.757	36	46	917	41	856	93.2	5.21	3479.62	46	High	High	High	High	High	High	High	High	High	High	High	High	High	High	High	High	High	High	High	High	High	High	High	High	1	2	Phospho [S411; T428]	0		Deamidated [Q26; Q50; Q149; Q188; Q399; Q408; Q433; Q435; R763]; Phospho [S411; T428]; Carboxymethyl [K142; K153]
High	Master Protein	A0A072V2Z0	ER membrane protein complex subunit-like protein OS=Medicago truncatula GN=MTR_3g110140 PE=4 SV=1	0	308.566	43	41	230	41	983	110.2	6.79	812.71	41	High	High	High	High	High	High	High	High	High	High	High	High	High	High	High	High	Not Found	High	High	High	High	High	High	High	1	0		0		Deamidated [Q261]
High	Master Protein	A0A072V1W7	Calnexin 2 OS=Medicago truncatula GN=MTR_3g098430 PE=3 SV=1	0	521.161	54	44	557	41	546	62.2	4.81	2513.53	44	High	High	High	High	High	High	High	High	High	High	High	High	High	High	High	High	High	High	High	High	High	High	High	High	1	0		0
High	Master Protein	G7LIZ2	Lipoxygenase OS=Medicago truncatula GN=MTR_8g018690 PE=3 SV=1	0	564.769	55	54	439	40	865	96.6	6.67	1889.56	54	High	High	High	High	High	High	High	High	High	High	High	High	High	High	High	High	High	High	High	High	High	High	High	High	1	0		0		Deamidated [R233; R793]
High	Master Protein	A0A072VAE0	Lipoxygenase OS=Medicago truncatula GN=MTR_3g081130 PE=3 SV=1	0	346.514	48	43	221	40	858	97.3	6.55	919.09	43	High	High	High	High	High	High	High	High	Not Found	High	High	High	High	High	High	High	High	High	High	High	High	High	High	High	1	0		0
High	Master Protein	A0A072TIB9	Tripeptidyl peptidase II OS=Medicago truncatula GN=MTR_0025s0060 PE=4 SV=1	0	254.386	37	43	103	40	1324	146.6	6.04	380.06	43	High	High	High	High	High	High	High	High	Not Found	High	High	High	High	High	High	High	High	High	High	High	High	High	High	High	1	0		0		Deamidated [Q889]
High	Master Protein	A0A072TVP5	FTSH extracellular protease family protein OS=Medicago truncatula GN=MTR_8g099605 PE=4 SV=1	0	287.487	41	40	135	40	918	103.5	8.5	559.2	40	High	High	High	High	High	High	High	High	High	High	High	High	High	High	High	High	High	High	High	High	High	High	High	High	1	0		0		Deamidated [R227; R514]
High	Master Protein	G7LJD5	Phototropin-2 protein OS=Medicago truncatula GN=MTR_8g070530 PE=4 SV=2	0	327.75	42	40	194	40	935	104.8	7.53	816.29	40	High	High	High	High	High	High	High	High	High	High	High	High	High	High	High	High	High	High	High	High	High	High	High	High	1	2	Phospho [T321; S526]	0		Deamidated [R217]; Phospho [T321; S526]
High	Master Protein	G7JUD3	Plasma membrane ATPase OS=Medicago truncatula GN=MTR_4g127710 PE=3 SV=1	0	969.082	49	75	1014	40	952	104.9	6.95	4555.06	75	High	High	High	High	High	High	High	High	High	High	High	High	High	High	High	High	High	High	High	High	High	High	High	High	1	7	Phospho [S6; S8; S371; T884; S934; T945; T951]	0		Deamidated [Q148; Q376; R425; Q545; Q889; Q912]; Phospho [S6; S8; S371; T884; S934; T945; T951]; Carboxymethyl [K208]
High	Master Protein	G7JYS0	Phospholipase D OS=Medicago truncatula GN=MTR_5g023050 PE=3 SV=2	0	380.439	41	40	249	40	872	98.6	6.98	1050.63	40	Not Found	High	High	High	High	High	High	High	Not Found	High	High	High	High	High	High	High	Not Found	High	High	High	High	High	High	High	1	0		0		Deamidated [Q361; R430; Q742]
High	Master Protein	G7IYN4	Disease resistance protein (CC-NBS-LRR class) family protein OS=Medicago truncatula GN=MTR_3g013790 PE=3 SV=1	0	263.335	27	40	159	40	1280	146	5.68	582.35	40	Not Found	High	High	High	High	High	High	High	Not Found	High	High	High	High	High	High	High	Not Found	High	High	High	High	High	High	High	1	0		0
High	Master Protein	A0A072V0J2	Protein disulfide-isomerase OS=Medicago truncatula GN=MTR_3g088220 PE=3 SV=1	0	486.617	70	41	423	39	513	57	5.1	1772.09	41	High	High	High	High	High	High	High	High	High	High	High	High	High	High	High	High	High	High	High	High	High	High	High	High	1	0		0
High	Master Protein	G7JBI2	ATP-dependent zinc metalloprotease FTSH-like protein OS=Medicago truncatula GN=MTR_3g096000 PE=4 SV=2	0	298.218	41	39	179	38	838	94	6.1	730.96	39	Not Found	High	High	High	High	High	High	High	Not Found	Not Found	High	High	High	High	High	High	Not Found	Not Found	High	High	High	High	High	High	1	0		0
High	Master Protein	S4T063	Hypothetical chloroplast RF1 OS=Medicago truncatula GN=ycf1 PE=4 SV=1	0	473.791	30	68	351	38	1756	210.6	9.38	1302.95	68	High	High	High	High	High	High	High	High	High	High	High	High	High	High	High	High	High	High	High	High	High	High	High	High	1	0		0		Deamidated [Q1217]
High	Master Protein	A0A072VM58	Oligosaccharyltransferase subunit ribophorin II OS=Medicago truncatula GN=MTR_1g069780 PE=4 SV=1	0	370.518	53	39	283	38	689	74.7	7.74	1225.23	39	High	High	High	High	High	High	High	High	High	High	High	High	High	High	High	High	High	High	High	High	High	High	High	High	1	0		0		Deamidated [R114]
High	Master Protein	G7IF28	Plastid transketolase OS=Medicago truncatula GN=MTR_1g116120 PE=4 SV=1	0	304.883	55	39	287	38	735	79.7	6.43	1034.84	39	High	High	High	High	High	High	High	High	High	High	High	High	High	High	High	High	High	High	High	High	High	High	High	High	1	0		0		Deamidated [Q190; R298]
High	Master Protein	G7J9S7	Translocon at the inner envelope membrane ofs protein 55-II OS=Medicago truncatula GN=MTR_3g105820 PE=4 SV=1	0	354.196	52	38	323	38	552	62	8.7	1252.27	38	High	High	High	High	High	High	High	High	Not Found	High	High	High	High	High	High	High	High	High	High	High	High	High	High	High	1	1	Phospho [S66]	0		Carboxymethyl [K341]; Deamidated [Q75]; Phospho [S66]
High	Master Protein	A0A072V9X9	Callose synthase-like protein OS=Medicago truncatula GN=MTR_3g075180 PE=4 SV=1	0	292.404	23	43	191	38	1908	217.6	8.65	763.8	43	Not Found	High	High	High	High	High	High	High	Not Found	High	High	High	High	High	High	High	Not Found	Not Found	High	High	High	High	High	High	1	0		0		Carboxymethyl [K409]; Deamidated [Q1887]
High	Master Protein	A0A072TYR3	Thylakoid rhodanese-like protein OS=Medicago truncatula GN=MTR_8g027835 PE=4 SV=1	0	505.744	58	38	649	38	482	50.9	5.21	3029.82	38	High	High	High	High	High	High	High	High	High	High	High	High	High	High	High	High	High	High	High	High	High	High	High	High	1	0		0		Deamidated [Q154; Q166; Q333]
High	Master Protein	G7I6U3	FTSH extracellular protease family protein OS=Medicago truncatula GN=MTR_1g080430 PE=4 SV=2	0	196.928	26	37	129	37	1214	139.8	6.61	455.38	37	High	High	High	High	High	High	High	High	Not Found	High	High	High	High	High	High	High	High	High	High	High	High	High	High	High	1	0		0
High	Master Protein	G7LAF4	Inner membrane protein OS=Medicago truncatula GN=MTR_8g091480 PE=3 SV=2	0	485.872	51	37	232	37	764	84.5	5.94	1193.39	37	High	High	High	High	High	High	High	High	High	High	High	High	High	High	High	High	High	High	High	High	High	High	High	High	1	0		0		Deamidated [Q366]
High	Master Protein	G7LB10	ATP-dependent zinc metalloprotease FTSH protein OS=Medicago truncatula GN=MTR_8g056860 PE=4 SV=1	0	240.156	35	37	112	37	988	112.9	6.47	405.68	37	High	High	High	High	High	High	High	High	High	High	High	High	High	High	High	High	High	High	High	High	High	High	High	High	1	0		0
High	Master Protein	G7JQ33	Drug resistance transporter-like ABC domain protein OS=Medicago truncatula GN=MTR_4g123850 PE=3 SV=2	0	260.239	24	40	189	36	1431	162	7.88	669.06	40	Not Found	High	High	High	High	High	High	High	High	High	High	High	High	High	High	High	High	High	High	High	High	High	High	High	1	1	Phospho [T42]	0		Deamidated [Q56; R62; R1074]; Phospho [T42]
High	Master Protein	G7I9M9	ATP synthase D chain OS=Medicago truncatula GN=MTR_1g095830 PE=2 SV=1	0	341.753	92	36	467	36	177	21	5.57	1875.79	36	High	High	High	High	High	High	High	High	High	High	High	High	High	High	High	High	High	High	High	High	High	High	High	High	1	0		0		Deamidated [Q50; Q57; Q81; Q98; Q132]; Carboxymethyl [K80]
High	Master Protein	S4SZZ8	Cytochrome f OS=Medicago truncatula GN=petA PE=3 SV=1	0	416.7	64	36	621	36	320	35.3	8.56	2573.44	36	High	High	High	High	High	High	High	High	High	High	High	High	High	High	High	High	High	High	High	High	High	High	High	High	1	0		0		Deamidated [Q91; Q138; R141; R189; Q193]; Carboxymethyl [K93; K157]
High	Master Protein	G7KDP1	ABC transporter B family-like protein OS=Medicago truncatula GN=MTR_5g029750 PE=4 SV=1	0	292.317	35	43	140	36	1234	135.2	9	622.54	43	High	High	High	High	High	High	High	High	High	High	High	High	High	High	High	High	High	High	High	High	High	High	High	High	1	1	Phospho [S604]	0		Phospho [S604]
High	Master Protein	A0A072VPD1	Vicilin 47 kDa protein OS=Medicago truncatula GN=MTR_1g103400 PE=4 SV=1	0	329.909	48	38	256	35	667	78.2	7.84	1050.74	38	High	High	High	High	High	High	High	High	High	High	High	High	High	High	High	High	Medium	High	High	High	High	High	High	High	1	0		0		Deamidated [R266; Q644]
High	Master Protein	G7I9Z0	Glycine dehydrogenase [decarboxylating] protein OS=Medicago truncatula GN=MTR_1g016230 PE=3 SV=1	0	334.132	35	35	215	35	1056	114.6	7.31	1028.17	35	High	High	High	High	High	High	High	High	High	High	High	High	High	High	High	High	High	High	High	High	High	High	High	High	1	0		0		Deamidated [Q566]
High	Master Protein	G7IUC7	Outer membrane OMP85 family protein OS=Medicago truncatula GN=MTR_2g098110 PE=4 SV=1	0	298.71	48	34	187	34	672	73	8.56	804.29	34	High	High	High	High	High	High	High	High	Not Found	High	High	High	High	High	High	High	High	High	High	High	High	High	High	High	1	0		0		Deamidated [Q129; R436]
High	Master Protein	I3SKN7	RuBisCO large subunit-binding protein OS=Medicago truncatula GN=MTR_4g057970 PE=2 SV=1	0	335.361	53	36	204	34	587	61.9	5.16	847.24	36	High	High	High	High	High	High	High	High	High	High	High	High	High	High	High	High	High	High	High	High	High	High	High	High	1	0		0
High	Master Protein	G7IBQ7	Protein translocase subunit SecA OS=Medicago truncatula GN=MTR_1g086050 PE=3 SV=1	0	184.518	32	35	75	34	1011	114.2	7.31	270.1	35	Not Found	High	High	High	High	High	Not Found	High	High	High	High	High	High	High	High	High	High	High	High	High	High	High	High	High	1	0		0		Deamidated [Q706]
High	Master Protein	G7K4R2	Heat shock protein 81-2 OS=Medicago truncatula GN=MTR_5g096430 PE=3 SV=1	0	370.156	48	43	221	34	699	80.1	5.03	887.12	43	High	High	High	High	High	High	High	High	High	High	High	High	High	High	High	High	Not Found	High	High	High	High	High	High	High	1	0		0
High	Master Protein	A0A072UX22	NAD-dependent epimerase/dehydratase family protein OS=Medicago truncatula GN=MTR_4g068970 PE=4 SV=1	0	516.253	54	34	338	34	641	68	5.67	1997.26	34	High	High	High	High	High	High	High	High	High	High	High	High	High	High	High	High	High	High	High	High	High	High	High	High	1	0		0		Deamidated [Q506; R617]; Carboxymethyl [K152; K629]
High	Master Protein	A0A072UQU8	ATP-dependent zinc metalloprotease FTSH protein OS=Medicago truncatula GN=MTR_4g094662 PE=3 SV=1	0	605.936	55	55	627	33	694	74.5	5.57	2583.72	55	High	High	High	High	High	High	High	High	High	High	High	High	High	High	High	High	High	High	High	High	High	High	High	High	1	3	Phospho [T227; S398; S632]	0		Deamidated [R136; Q143; Q222; Q396; R454; Q574; R630; Q642]; Carboxymethyl [K220; K321]; Phospho [T227; S398; S632]
High	Master Protein	A0A072US24	DIL domain myosin family protein OS=Medicago truncatula GN=MTR_4g125690 PE=3 SV=1	0	252.046	28	37	126	33	1530	172.5	8.57	494.98	37	High	High	High	High	High	High	High	High	Not Found	High	High	High	High	High	High	High	High	High	High	High	High	High	High	High	1	1	Phospho [S1056]	0		Phospho [S1056]
High	Master Protein	A0A072V3A8	Catalase OS=Medicago truncatula GN=MTR_3g115370 PE=3 SV=1	0	341.552	55	33	419	33	492	56.7	7.3	1659.97	33	High	High	High	High	High	High	High	High	High	High	High	High	High	High	High	High	High	High	High	High	High	High	High	High	1	0		0		Deamidated [Q96; Q253; Q301; Q362]; Carboxymethyl [K5]
High	Master Protein	A0A072V9Z1	Peroxisomal (S)-2-hydroxy-acid oxidase GLO1 OS=Medicago truncatula GN=MTR_2g070420 PE=3 SV=1	0	335.539	72	33	292	33	372	40.8	9.13	1155.1	33	High	High	High	High	High	High	High	High	High	High	High	High	High	High	High	High	High	High	High	High	High	High	High	High	1	0		0		Deamidated [R258]
High	Master Protein	A0A072UZC8	Heat shock 70 kDa protein OS=Medicago truncatula GN=MTR_3g081170 PE=3 SV=1	0	250.998	42	33	114	33	884	98.9	5.8	462.57	33	High	High	High	High	High	High	High	High	High	High	High	High	High	High	High	High	High	High	High	High	High	High	High	High	1	0		0
High	Master Protein	G7JBW9	Outer membrane OMP85 family protein OS=Medicago truncatula GN=MTR_3g071450 PE=4 SV=1	0	221.737	62	34	209	33	516	57.7	6.55	822.64	34	High	High	High	High	High	High	High	High	High	High	High	High	High	High	High	High	High	High	High	High	High	High	High	High	1	0		0		Carboxymethyl [K11]; Deamidated [R509]
High	Master Protein	G7IKY4	Translocon outer complex protein OS=Medicago truncatula GN=MTR_2g030630 PE=4 SV=1	0	283.175	36	33	117	33	1338	146.5	4.72	447.48	33	Not Found	High	High	High	High	High	High	High	High	High	High	High	High	High	High	High	High	High	High	High	High	High	High	High	1	0		0		Carboxymethyl [K7]
High	Master Protein	A0A072VE85	Serine/Threonine kinase, ABC1 family protein OS=Medicago truncatula GN=MTR_1g009860 PE=4 SV=1	0	179.308	48	33	148	33	654	73.4	5.43	517.07	33	Not Found	High	High	High	High	High	High	High	High	High	High	High	High	High	High	High	Not Found	High	High	High	High	High	High	High	1	0		0		Deamidated [Q63]
High	Master Protein	A0A072UGS7	Calcium-transporting ATPase OS=Medicago truncatula GN=MTR_4g008650 PE=3 SV=1	0	224.896	32	35	218	33	1033	113.1	5.72	781.71	35	Not Found	High	High	High	High	High	High	High	Not Found	High	High	High	High	High	High	High	High	High	High	High	High	High	High	High	1	0		0		Carboxymethyl [K715]; Deamidated [Q713]
High	Master Protein	G7JW95	Ferredoxin--NADP reductase OS=Medicago truncatula GN=MTR_5g022300 PE=3 SV=1	0	330.701	66	33	492	33	361	40.3	8.21	1958.78	33	High	High	High	High	High	High	High	High	High	High	High	High	High	High	High	High	High	High	High	High	High	High	High	High	1	0		0
High	Master Protein	G7IP43	Early-responsive to dehydration stress protein (ERD4) OS=Medicago truncatula GN=MTR_2g018780 PE=4 SV=1	0	229.044	30	33	207	33	722	81.6	9.17	694.47	33	High	High	High	High	High	High	High	High	Not Found	High	High	High	High	High	High	High	High	High	High	High	High	High	High	High	1	2	Phospho [S713; S716]	0		Phospho [S713; S716]
High	Master Protein	A0A072URD6	Plasma membrane ATPase OS=Medicago truncatula GN=MTR_4g107500 PE=3 SV=1	0	597.529	44	56	594	33	958	105.5	6.6	2405.04	56	High	High	High	High	High	High	High	High	Not Found	High	High	High	High	High	High	High	High	High	High	High	High	High	High	High	1	2	Phospho [T891; T957]	0		Deamidated [Q399]; Phospho [T891; T957]
High	Master Protein	G7I6P0	Calcium-binding EF hand protein OS=Medicago truncatula GN=MTR_1g045490 PE=4 SV=2	0	235.595	44	32	125	32	800	90	6.48	529.55	32	High	High	High	High	High	High	High	High	High	High	High	High	High	High	High	High	High	High	High	High	High	High	High	High	1	0		0
High	Master Protein	A0A072TTP2	Lipoxygenase OS=Medicago truncatula GN=MTR_8g080230 PE=3 SV=1	0	231.502	41	34	126	32	916	102.9	7.39	481.63	34	Not Found	High	High	High	High	High	High	High	Not Found	High	High	High	High	High	High	High	Not Found	High	High	High	High	High	High	High	1	0		0		Deamidated [Q65]
High	Master Protein	G7JX26	CHUP1-like protein OS=Medicago truncatula GN=MTR_5g053270 PE=4 SV=1	0	218.146	34	34	90	32	997	111.2	5.44	368.07	34	High	High	High	High	High	Not Found	High	High	High	High	High	High	High	High	High	High	High	High	High	High	High	Not Found	Not Found	Not Found	1	0		0
High	Master Protein	G7KNY7	Cyclic nucleotide-binding domain protein OS=Medicago truncatula GN=MTR_6g087000 PE=3 SV=2	0	207.445	34	32	107	32	1072	119.5	5.07	400.88	32	Not Found	High	High	High	High	High	High	High	Not Found	High	High	High	High	High	High	High	Not Found	High	High	High	High	High	High	High	1	1	Phospho [S414]	0		Phospho [S414]
High	Master Protein	G7LAL2	Nuclear pore complex Nup155-like protein OS=Medicago truncatula GN=MTR_8g105290 PE=4 SV=1	0	240.999	25	32	100	32	1484	162	6.04	426.52	32	High	High	High	High	High	High	High	High	Not Found	High	High	High	High	High	High	High	Not Found	High	High	High	High	High	High	High	1	0		0
High	Master Protein	B5BLW2	Carotenoid cleavage dioxygenase OS=Medicago truncatula GN=ccd1 PE=2 SV=1	0	325.994	64	32	217	32	540	60.9	6.79	1022.94	32	High	High	High	High	High	High	High	High	High	High	High	High	High	High	High	High	Not Found	High	High	High	High	High	High	High	1	0		0		Deamidated [Q518]
High	Master Protein	G7IT80	Nuclear-pore anchor-like protein OS=Medicago truncatula GN=MTR_2g063480 PE=4 SV=2	0	181.01	18	32	64	32	2095	235.9	5.07	250.49	32	High	High	High	High	High	High	High	High	High	High	High	High	High	High	High	Not Found	Not Found	High	High	High	High	High	Not Found	Not Found	1	0		0		Deamidated [Q1115]
High	Master Protein	G7J8R4	NADH-ubiquinone oxidoreductase 75 kDa subunit OS=Medicago truncatula GN=MTR_3g065130 PE=3 SV=1	0	329.65	52	32	200	32	739	80.7	7.36	1018.43	32	Not Found	High	High	High	High	High	High	High	High	High	High	High	High	High	High	High	High	Not Found	High	High	High	High	High	High	1	0		0
High	Master Protein	S4T093	Photosystem II CP43 reaction center protein OS=Medicago truncatula GN=psbC PE=3 SV=1	0	419.964	40	31	645	31	473	51.9	7.21	2605.74	31	High	High	High	High	High	High	High	High	High	High	High	High	High	High	High	High	High	High	High	High	High	High	High	High	1	2	Phospho [T335; T397]	0		Deamidated [R41; Q332; R343; R370; Q385; Q388; R391; R423; R461]; Carboxymethyl [K339]; Phospho [T335; T397]
High	Master Protein	A0A072UDY2	Presequence protease OS=Medicago truncatula GN=MTR_5g004680 PE=4 SV=1	0	210.311	33	31	106	31	1077	120.6	5.55	400.16	31	Not Found	High	High	High	High	High	High	High	Not Found	High	High	High	High	High	High	High	Not Found	High	High	High	High	High	High	High	1	0		0
High	Master Protein	G7LJ01	Acetyltransferase component of pyruvate dehydrogenase complex OS=Medicago truncatula GN=MTR_8g018770 PE=3 SV=1	0	280.492	51	31	170	31	543	59.3	7.71	771.83	31	High	High	High	High	High	High	High	High	High	High	High	High	High	High	High	High	High	High	High	High	High	High	High	High	1	0		0
High	Master Protein	A0A072VJ28	Glucan synthase-like protein OS=Medicago truncatula GN=MTR_2g061380 PE=4 SV=1	0	289.2	21	41	148	31	1945	224.5	9.09	583.48	41	High	High	High	High	High	High	High	High	High	High	High	High	High	High	High	High	High	High	High	High	High	High	High	High	1	1	Phospho [T20]	0		Phospho [T20]
High	Master Protein	G7J5Z1	Dolichyl-diphosphooligosaccharide--protein glycosyltransferase subunit 1 OS=Medicago truncatula GN=MTR_3g115980 PE=3 SV=2	0	293.022	47	32	237	31	617	69.6	7.72	1043.13	32	High	High	High	High	High	High	High	High	High	High	High	High	High	High	High	High	High	High	High	High	High	High	High	High	1	0		0
High	Master Protein	G7KTI5	Villin OS=Medicago truncatula GN=MTR_7g091460 PE=4 SV=2	0	233.906	38	30	105	30	983	107.6	5.77	402.08	30	Not Found	High	High	High	High	High	High	High	High	High	High	High	High	High	High	High	High	High	High	High	High	High	High	High	1	0		0		Deamidated [Q178]
High	Master Protein	G7IT85	Phosphoglycerate kinase OS=Medicago truncatula GN=MTR_2g066110 PE=3 SV=1	0	315.296	61	33	248	30	479	50	7.14	1077.37	33	High	High	High	High	High	High	High	High	High	High	High	High	High	High	High	High	High	High	High	High	High	High	High	High	1	0		0		Deamidated [R228]
High	Master Protein	G7L0I7	Cobalamin-independent methionine synthase OS=Medicago truncatula GN=MTR_7g086300 PE=3 SV=1	0	362.681	46	38	191	30	803	88.8	6.6	852.71	38	High	High	High	High	High	High	High	High	High	High	High	High	High	High	High	High	High	High	High	High	High	High	High	High	1	0		0
High	Master Protein	G7KVS0	E1 subunit-like 2-oxoglutarate dehydrogenase OS=Medicago truncatula GN=MTR_7g023770 PE=4 SV=2	0	346.644	39	43	178	30	1023	115.7	6.95	718.59	43	High	High	High	High	High	High	High	High	Not Found	High	High	High	High	High	High	High	Not Found	High	High	High	High	High	Not Found	High	1	0		0
High	Master Protein	A0A072VCV1	Phototropin-2 protein OS=Medicago truncatula GN=MTR_2g095980 PE=4 SV=1	0	240.295	33	34	130	30	968	109.6	7.46	481.42	34	High	High	High	High	High	High	High	High	High	High	High	High	High	High	High	High	High	High	High	High	High	High	High	High	1	4	Phospho [S36; S40; S107; S310]	0		Phospho [S36; S40; S107; S310]; Deamidated [Q622]
High	Master Protein	A0A072UME9	Delta(24)-sterol reductase-like protein OS=Medicago truncatula GN=MTR_4g074350 PE=4 SV=1	0	207.944	45	30	158	30	567	65.9	8.38	612.35	30	High	High	High	High	High	High	High	High	High	High	High	High	High	High	High	High	High	High	High	High	High	High	High	High	1	0		0
High	Master Protein	B7FH20	ATP synthase OS=Medicago truncatula GN=MTR_8g092040 PE=2 SV=1	0	251.137	79	30	248	30	244	27.7	8.12	884.16	30	High	High	High	High	High	High	High	High	High	High	High	High	High	High	High	High	High	High	High	High	High	High	High	High	1	0		0		Deamidated [Q115]
High	Master Protein	G7L6W7	Sad1/UNC-like protein OS=Medicago truncatula GN=MTR_8g043510 PE=4 SV=1	0	232.217	54	29	169	29	462	50.4	8.16	681.32	29	High	High	High	High	High	High	High	High	High	High	High	High	High	High	High	High	High	High	High	High	High	High	High	High	1	0		0		Deamidated [R257; R292]
High	Master Protein	G7J4Y2	Thylakoid-bound ascorbate peroxidase OS=Medicago truncatula GN=MTR_3g088160 PE=3 SV=1	0	288.656	55	30	367	29	436	47.4	8.95	1396.23	30	High	High	High	High	High	High	High	High	High	High	High	High	High	High	High	High	High	High	High	High	High	High	High	High	1	0		0		Deamidated [R150; R260]; Carboxymethyl [K247]
High	Master Protein	G7J2R6	110 kDa 4SNc-tudor domain protein OS=Medicago truncatula GN=MTR_3g098420 PE=4 SV=1	0	190.95	37	29	69	29	992	108.2	6.98	277.29	29	Not Found	High	High	High	High	High	High	High	Not Found	High	High	High	High	High	High	High	Not Found	High	High	High	High	High	High	High	1	0		0
High	Master Protein	G7IJX0	DUF639 family protein OS=Medicago truncatula GN=MTR_2g007330 PE=4 SV=1	0	201.025	37	29	143	29	808	91.5	9.42	568.78	29	Not Found	High	High	High	High	High	High	High	Not Found	High	High	High	High	High	High	High	Not Found	High	High	High	High	High	High	High	1	0		0		Deamidated [R430]
High	Master Protein	A0A072URI2	ABC transporter B family protein OS=Medicago truncatula GN=MTR_4g124040 PE=4 SV=1	0	365.556	40	50	214	29	1278	137.7	7.05	891.52	50	Not Found	High	High	High	High	High	High	High	Not Found	High	High	High	High	High	High	High	Not Found	High	High	High	High	High	High	High	1	0		0		Deamidated [Q499; Q511; Q516; Q1173; Q1178]; Carboxymethyl [K496; K1179]
High	Master Protein	G7KH12	Phosphoinositide phospholipase C OS=Medicago truncatula GN=MTR_5g082620 PE=4 SV=1	0	231.834	55	32	144	29	589	66.9	6.54	529.38	32	High	High	High	High	High	High	High	High	High	Not Found	High	High	High	High	High	High	High	High	High	High	High	High	High	High	1	1	Phospho [S273]	0		Phospho [S273]
High	Master Protein	A0A072U103	Acetyl-CoA carboxylase, carboxyl transferase, alpha subunit OS=Medicago truncatula GN=MTR_7g066870 PE=3 SV=1	0	228.106	37	29	91	29	860	95.4	9.35	350.51	29	High	High	High	High	High	High	High	High	High	High	High	High	High	High	High	High	High	High	High	High	High	High	High	High	1	0		0		Deamidated [Q496; R850]
High	Master Protein	G7IPG7	UDP-glucose:glycoprotein glucosyltransferase OS=Medicago truncatula GN=MTR_2g006960 PE=4 SV=2	0	217.997	21	29	101	29	1631	185	5.9	391.6	29	Not Found	High	High	High	High	High	High	High	Medium	High	High	High	High	High	High	High	Not Found	High	High	High	High	High	High	High	1	0		0		Deamidated [R904]
High	Master Protein	G7JCD0	Plasma membrane ATPase OS=Medicago truncatula GN=MTR_3g108800 PE=3 SV=1	0	604.771	44	57	470	28	951	104.6	6.83	2138.66	57	Not Found	High	High	High	High	High	High	High	Not Found	Not Found	High	High	High	High	High	High	Not Found	High	High	High	High	High	High	High	1	2	Phospho [S889; S933]	0		Phospho [S889; S933]; Deamidated [R422]
High	Master Protein	G7L7C9	Processing peptidase OS=Medicago truncatula GN=MTR_8g102230 PE=3 SV=1	0	380.07	64	29	300	28	510	54.9	6.05	1369.78	29	High	High	High	High	High	High	High	High	High	High	High	High	High	High	High	High	High	High	High	High	High	High	High	High	1	0		0		Deamidated [R260; R448]
High	Master Protein	G7IF78	Multidrug resistance protein ABC transporter family protein OS=Medicago truncatula GN=MTR_1g088680 PE=4 SV=1	0	195.656	22	32	136	28	1515	169.4	7.8	506.46	32	High	High	High	High	High	High	High	High	High	High	Not Found	High	High	High	High	High	Not Found	High	Medium	High	High	High	High	High	1	2	Phospho [S900; S902]	0		Deamidated [Q1414]; Phospho [S900; S902]
High	Master Protein	G8A394	Acetyl-CoA carboxylase OS=Medicago truncatula GN=MTR_3g073860 PE=4 SV=1	0	202.982	17	28	79	28	2256	251.7	6.27	326.31	28	Not Found	High	High	High	High	High	High	High	Not Found	High	High	High	High	High	High	High	Not Found	High	High	High	High	High	High	High	1	0		0
High	Master Protein	G7KH23	LRR receptor-like kinase OS=Medicago truncatula GN=MTR_5g083910 PE=4 SV=1	0	251.332	33	34	163	28	996	110.1	6.37	632.91	34	High	High	High	High	High	High	High	High	Not Found	High	High	High	High	High	High	High	High	High	High	High	High	High	High	High	1	1	Phospho [S945]	0		Phospho [S945]; Deamidated [R474]
High	Master Protein	G7JC76	Neutral alpha-glucosidase OS=Medicago truncatula GN=MTR_3g096870 PE=3 SV=1	0	221.421	37	28	105	28	912	103.7	6.19	435.09	28	Not Found	High	High	High	High	High	High	High	Not Found	High	High	High	High	High	High	High	Not Found	High	High	High	High	High	High	High	1	0		0
High	Master Protein	A0A072U7K6	Nuclear matrix constituent-like protein OS=Medicago truncatula GN=MTR_7g018610 PE=4 SV=1	0	136.49	22	28	54	28	1175	134.4	5.07	195.45	28	High	High	High	High	High	Not Found	Not Found	Not Found	High	High	High	High	High	High	Not Found	Not Found	High	High	High	High	High	Not Found	Not Found	Not Found	1	0		0		Deamidated [R45]
High	Master Protein	G7JJ97	Aminomethyltransferase OS=Medicago truncatula GN=MTR_4g132360 PE=2 SV=2	0	233.07	56	28	291	28	407	44.1	8.7	1120.01	28	High	High	High	High	High	High	High	High	High	High	High	High	High	High	High	High	High	High	High	High	High	High	High	High	1	0		0		Carboxymethyl [K92; K362]; Deamidated [Q195]
High	Master Protein	A0A072VFT5	Protein ROOT HAIR DEFECTIVE 3 homolog OS=Medicago truncatula GN=MTR_2g029340 PE=3 SV=1	0	272.847	37	31	186	28	833	93	5.67	862.64	31	High	High	High	High	High	High	High	High	Not Found	High	High	High	High	High	High	High	High	High	High	High	High	High	High	High	1	0		0		Deamidated [R405]
High	Master Protein	B7FH09	DREPP plasma membrane protein OS=Medicago truncatula GN=MTR_2g437530 PE=2 SV=1	0	313.285	82	28	197	28	214	23.8	4.92	852.55	28	High	High	High	High	High	High	High	High	High	High	High	High	High	High	High	High	High	High	High	High	High	High	High	High	1	0		0
High	Master Protein	G7J2W4	Myosin heavy chain-like protein OS=Medicago truncatula GN=MTR_3g109330 PE=2 SV=1	0	199.816	47	27	170	27	439	49.5	9.41	643.99	27	High	High	High	High	High	High	High	High	High	High	High	High	High	High	High	High	High	High	High	High	High	High	High	High	1	1	Phospho [S49]	0		Deamidated [Q48]; Phospho [S49]
High	Master Protein	G7KYU2	Porin/voltage-dependent anion-selective channel protein OS=Medicago truncatula GN=MTR_7g009330 PE=4 SV=1	0	492.718	89	28	545	27	277	29.6	8.88	2789.23	28	High	High	High	High	High	High	High	High	High	High	High	High	High	High	High	High	High	High	High	High	High	High	High	High	1	1	Phospho [S119]	0		Deamidated [Q60; Q110; R210; Q219; Q243]; Phospho [S119]; Carboxymethyl [K125]
High	Master Protein	G7L912	CASP carboxy-terminal protein OS=Medicago truncatula GN=MTR_8g103950 PE=4 SV=1	0	197.6	36	28	96	27	683	78.9	5.57	382.61	28	High	High	High	High	High	High	High	High	High	High	High	High	High	High	High	High	High	High	High	High	High	High	High	High	1	1	Phospho [S583]	0		Phospho [S583]
High	Master Protein	A0A072UIC5	Calmodulin-binding protein, putative OS=Medicago truncatula GN=MTR_4g036110 PE=4 SV=1	0	203.716	36	27	162	27	393	45	9.48	623.09	27	High	High	High	High	High	High	High	High	High	High	High	High	High	High	High	High	High	High	High	High	High	High	High	High	1	1	Phospho [S183]	0		Phospho [S183]
High	Master Protein	G7KHK9	p-loop nucleoside triphosphate hydrolase superfamily protein OS=Medicago truncatula GN=MTR_6g005760 PE=4 SV=2	0	149.562	45	32	119	27	604	66.9	8.78	386.17	32	High	High	High	High	High	High	High	High	High	High	High	High	High	High	High	High	High	High	High	High	High	High	High	High	1	0		0
High	Master Protein	A0A072UYT5	Ribulose bisphosphate carboxylase/oxygenase activase OS=Medicago truncatula GN=MTR_3g068030 PE=4 SV=1	0	592.31	71	45	660	27	422	46.6	6.83	2781.24	45	High	High	High	High	High	High	High	High	High	High	High	High	High	High	High	High	High	High	High	High	High	High	High	High	1	2	Phospho [S66; S159]	0		Deamidated [Q69; Q70; Q161; R283; R286; Q372; Q414]; Carboxymethyl [K374]; Phospho [S66; S159]
High	Master Protein	A0A072V7S2	ATP-dependent zinc metalloprotease FTSH protein OS=Medicago truncatula GN=MTR_2g438140 PE=3 SV=1	0	409.089	57	47	432	27	690	74.1	6.44	1738.64	47	High	High	High	High	High	High	High	High	High	High	High	High	High	High	High	High	High	High	High	High	High	High	High	High	1	2	Phospho [T224; S395]	0		Carboxymethyl [K217; K318]; Deamidated [Q219; Q393; R451]; Phospho [T224; S395]
High	Master Protein	A0A072VL92	Ion channel pollux-like protein OS=Medicago truncatula GN=MTR_1g076330 PE=4 SV=1	0	190.481	27	27	204	27	839	94.9	8.5	752.18	27	High	High	High	High	High	High	High	High	Not Found	High	High	High	High	High	High	High	High	High	High	High	High	High	High	High	1	0		0		Deamidated [Q522]
High	Master Protein	G7K274	Outer membrane OMP85 family protein OS=Medicago truncatula GN=MTR_5g083050 PE=4 SV=2	0	202.671	51	28	111	27	520	58.7	5.73	445.24	28	Not Found	High	High	High	High	High	High	High	Not Found	High	Medium	High	High	High	High	High	High	High	High	High	High	High	High	High	1	0		0
High	Master Protein	G7JX25	Uncharacterized protein OS=Medicago truncatula GN=MTR_5g053260 PE=2 SV=1	0	182.646	45	27	84	27	545	61.6	5.4	375.61	27	Not Found	High	High	High	High	High	High	High	Not Found	High	High	High	High	High	High	Not Found	Not Found	High	High	High	High	High	High	High	1	0		0		Carboxymethyl [K459]; Deamidated [Q453]
High	Master Protein	G7JIL4	V-type proton ATPase subunit a OS=Medicago truncatula GN=MTR_4g071070 PE=3 SV=1	0	306.524	34	28	284	27	822	92.7	6.18	1040.17	28	High	High	High	High	High	High	High	High	High	High	High	High	High	High	High	High	High	High	High	High	High	High	High	High	1	2	Phospho [T96; S396]	0		Deamidated [Q97; Q151; Q222; Q370; Q376; Q398]; Phospho [T96; S396]
High	Master Protein	G7J9N5	SPFH domain/band 7 family protein OS=Medicago truncatula GN=MTR_3g093220 PE=4 SV=1	0	288.956	58	26	167	26	400	43.4	8.44	854.41	26	High	High	High	High	High	High	High	High	Not Found	High	High	High	High	High	High	High	High	High	High	High	High	High	High	High	1	0		0		Deamidated [R298; Q302; R381]
High	Master Protein	G7JX40	Serine/Threonine kinase domain protein OS=Medicago truncatula GN=MTR_5g053450 PE=4 SV=1	0	177.013	33	26	152	26	575	64.9	9.47	508.78	26	Not Found	High	High	High	High	High	High	High	Not Found	High	High	High	High	High	High	High	High	High	High	High	High	High	High	High	1	0		0
High	Master Protein	G7IS30	Lipoxygenase OS=Medicago truncatula GN=MTR_2g099570 PE=3 SV=1	0	224.909	40	33	113	26	861	97.3	6.54	441.41	33	Not Found	High	High	High	High	Not Found	High	High	Not Found	High	High	High	High	High	High	High	Not Found	High	High	High	High	High	High	High	1	0		0
High	Master Protein	G7IBR0	ABC transporter B family protein OS=Medicago truncatula GN=MTR_1g086080 PE=4 SV=1	0	271.357	31	32	98	26	1289	139.2	7.77	442.16	32	High	High	High	High	High	High	High	High	High	High	High	High	High	High	High	High	High	High	High	High	High	High	High	Not Found	1	0		0		Carboxymethyl [K1228]; Deamidated [R1233]
High	Master Protein	G7KEW5	p-loop nucleoside triphosphate hydrolase superfamily protein OS=Medicago truncatula GN=MTR_5g020530 PE=3 SV=1	0	186.913	38	30	117	26	630	70.5	9.14	460.25	30	High	High	High	High	High	High	High	High	Not Found	High	High	High	High	High	High	High	High	High	High	High	High	High	High	High	1	0		0		Deamidated [Q355; Q368]
High	Master Protein	G7JNF5	L-ascorbate peroxidase OS=Medicago truncatula GN=MTR_4g073410 PE=2 SV=1	0	327.323	65	28	378	26	287	31.7	6.74	1690.73	28	High	High	High	High	High	High	High	High	High	High	High	High	High	High	High	High	High	High	High	High	High	High	High	High	1	0		0		Carboxymethyl [K152]; Deamidated [R60; R165]
High	Master Protein	A0A072VN55	Viral A-type inclusion protein, putative OS=Medicago truncatula GN=MTR_1g082215 PE=4 SV=1	0	187.02	39	26	61	26	632	72.6	5.25	242.64	26	High	High	High	High	High	High	High	Not Found	High	High	High	High	High	High	Not Found	High	High	High	High	High	High	Not Found	Not Found	Not Found	1	0		0
High	Master Protein	G7JM88	Lethal leaf-spot protein, putative OS=Medicago truncatula GN=MTR_4g057200 PE=4 SV=1	0	243.207	48	27	188	26	542	61.1	8	741.83	27	High	High	High	High	High	High	High	High	High	High	High	High	High	High	High	High	High	High	High	High	High	High	High	High	1	0		0		Carboxymethyl [K222]; Deamidated [Q241; R242; Q326]
High	Master Protein	G7JD38	Xylose isomerase OS=Medicago truncatula GN=MTR_4g128840 PE=3 SV=2	0	304.976	53	27	239	26	480	54.2	6.44	996.23	27	High	High	High	High	High	High	High	High	Not Found	High	High	High	High	High	High	High	High	High	High	High	High	High	High	High	1	0		0		Deamidated [Q174; R235]
High	Master Protein	G7JKQ6	Dynamin-2B-like protein OS=Medicago truncatula GN=MTR_4g030140 PE=3 SV=1	0	176.563	31	26	73	26	922	100.1	9.11	305.36	26	Not Found	High	High	High	High	High	High	High	Not Found	High	High	High	High	High	High	High	High	High	High	High	High	High	High	High	1	0		0		Deamidated [R74; R872]
High	Master Protein	G7LAR7	CCR4-NOT transcription complex protein, putative OS=Medicago truncatula GN=MTR_8g005820 PE=4 SV=2	0	114.46	12	26	52	26	2393	265.8	5.87	179.87	26	Not Found	High	High	High	High	High	High	High	High	High	High	High	High	High	High	High	Medium	High	High	High	High	High	High	High	1	0		0
High	Master Protein	G7IAZ5	Pti1-like kinase OS=Medicago truncatula GN=MTR_1g116520 PE=3 SV=2	0	208.747	59	27	186	26	403	44.8	8.63	757.56	27	High	High	High	High	High	High	High	High	High	High	High	High	High	High	High	High	High	High	High	High	High	High	High	High	1	0		0
High	Master Protein	G7KRX3	Auxin transporter BIG OS=Medicago truncatula GN=MTR_7g017100 PE=4 SV=2	0	150.947	7	26	47	26	5101	566.6	6.14	170.7	26	Not Found	High	High	High	High	High	High	High	Not Found	High	High	High	High	High	Not Found	High	Not Found	High	High	High	High	High	High	High	1	0		0
High	Master Protein	G7KRV2	TPR repeat protein OS=Medicago truncatula GN=MTR_7g108590 PE=4 SV=1	0	133.151	46	26	142	26	446	49.8	9.07	444.69	26	Not Found	High	High	High	High	High	High	High	Not Found	High	High	High	High	High	High	High	Not Found	High	High	High	High	High	High	High	1	0		0
High	Master Protein	A0A072UYN5	Hydroxyproline-rich glycoprotein family protein OS=Medicago truncatula GN=MTR_3g063200 PE=4 SV=1	0	448.201	51	26	293	26	435	47.3	6.09	1528.79	26	High	High	High	High	High	High	High	High	High	High	High	High	High	High	High	High	High	High	High	High	High	High	High	High	1	3	Phospho [S229; T233; S371]	0		Deamidated [Q235; Q236; Q262; Q364]; Phospho [S229; T233; S371]
High	Master Protein	G7K2J4	Porin/voltage-dependent anion-selective channel protein OS=Medicago truncatula GN=MTR_5g015580 PE=2 SV=1	0	372.211	82	28	442	26	276	29.5	9.41	2028.6	28	High	High	High	High	High	High	High	High	High	High	High	High	High	High	High	High	High	High	High	High	High	High	High	High	1	0		0
High	Master Protein	G7JUV4	ATP-dependent zinc metalloprotease FTSH protein OS=Medicago truncatula GN=MTR_4g064350 PE=3 SV=1	0	238.245	37	30	189	26	807	89.2	6.71	805.23	30	Not Found	High	High	High	High	High	High	High	Not Found	High	High	High	High	High	High	High	Not Found	High	High	High	High	High	High	High	1	0		0
High	Master Protein	G7I836	Mitochondrial Rho GTPase OS=Medicago truncatula GN=MTR_1g082870 PE=3 SV=1	0	275.692	38	26	241	26	646	71.7	5.53	1103.3	26	High	High	High	High	High	High	High	High	High	High	High	High	High	High	High	High	High	High	High	High	High	High	High	High	1	0		0		Deamidated [Q309]
High	Master Protein	G7JU59	LRR receptor-like kinase OS=Medicago truncatula GN=MTR_4g113100 PE=4 SV=1	0	209.387	38	29	172	26	655	71.4	8.56	661.1	29	High	High	High	High	High	High	High	High	High	High	High	High	High	High	High	High	High	High	High	High	High	High	High	High	1	0		0		Deamidated [R506]
High	Master Protein	Q2MJ15	Cytochrome P450 family monooxygenase OS=Medicago truncatula GN=CYP92A29 PE=2 SV=1	0	186.497	41	25	121	25	512	59.1	8.63	490.61	25	Not Found	High	High	High	High	High	High	High	Not Found	Not Found	High	High	High	High	High	High	Not Found	High	High	High	High	High	High	High	1	0		0
High	Master Protein	I3S1P8	Porin/voltage-dependent anion-selective channel protein OS=Medicago truncatula GN=MTR_6g011390 PE=2 SV=1	0	398.603	78	29	517	25	278	30	9.03	2539.39	29	High	High	High	High	High	High	High	High	High	High	High	High	High	High	High	High	High	High	High	High	High	High	High	High	1	0		0		Deamidated [Q59; Q220; R232; Q244]
High	Master Protein	G7JU14	Heat shock 70 kDa protein OS=Medicago truncatula GN=MTR_4g092920 PE=3 SV=1	0	264.107	63	39	151	25	675	72.3	6.07	599.23	39	High	High	High	Not Found	High	High	High	High	Not Found	High	High	Not Found	High	High	High	High	Not Found	High	High	High	High	High	High	High	1	0		0
High	Master Protein	G7IMV1	Alpha-L-arabinofuranosidase/beta-D-xylosidase OS=Medicago truncatula GN=MTR_2g034720 PE=4 SV=1	0	195.842	33	25	139	25	762	82.6	8.47	553.28	25	High	Not Found	High	High	High	High	High	High	High	High	High	High	High	High	High	High	High	High	High	High	High	High	High	High	1	0		0		Deamidated [Q190; R197]
High	Master Protein	G7IGB8	Calcium-transporting ATPase OS=Medicago truncatula GN=MTR_2g038310 PE=3 SV=2	0	255.791	23	29	169	25	1093	119.1	7.28	684.84	29	Not Found	High	High	High	High	High	High	High	Not Found	High	High	High	High	High	High	High	Not Found	High	High	High	High	High	High	High	1	1	Phospho [S31]	0		Deamidated [R29; R182]; Phospho [S31]
High	Master Protein	G7JNH3	Alanine--tRNA ligase OS=Medicago truncatula GN=MTR_4g074640 PE=3 SV=1	0	143.145	27	25	52	25	950	104.5	6.07	185.37	25	High	High	High	High	High	High	High	High	High	High	High	High	High	High	High	High	High	High	High	High	High	High	High	High	1	0		0
High	Master Protein	G7J3A3	Alpha-mannosidase OS=Medicago truncatula GN=MTR_3g098650 PE=3 SV=1	0	155.515	30	28	86	25	1016	114.7	6.95	348.68	28	Not Found	High	High	High	High	High	High	High	Not Found	High	High	High	High	High	High	High	Not Found	High	High	High	High	High	High	High	1	0		0
High	Master Protein	G7JD57	Diacylglycerol kinase OS=Medicago truncatula GN=MTR_4g129070 PE=3 SV=1	0	187.408	53	25	96	25	482	53.5	8.28	386.48	25	Not Found	High	High	High	High	High	High	High	Not Found	Not Found	Not Found	High	High	High	High	High	Not Found	Not Found	Not Found	High	High	High	High	High	1	0		0		Deamidated [R73]
High	Master Protein	A0A072V208	Pleckstrin-like (PH) and lipid-binding START domain protein OS=Medicago truncatula GN=MTR_4g116840 PE=4 SV=1	0	130.347	35	25	88	25	737	82.7	8.19	298.8	25	Not Found	High	High	High	High	High	High	High	Not Found	High	High	High	High	High	High	High	Not Found	High	High	High	High	High	High	High	1	0		0
High	Master Protein	G7KRL3	Calreticulin OS=Medicago truncatula GN=MTR_7g080370 PE=3 SV=1	0	242.811	62	29	113	25	421	49.3	5.88	472.87	29	High	High	High	High	High	High	High	High	Not Found	High	High	High	High	High	High	High	Medium	High	High	High	High	High	High	High	1	0		0
High	Master Protein	A0A072VNG3	Protoporphyrinogen IX oxidase OS=Medicago truncatula GN=MTR_1g085730 PE=4 SV=1	0	256.621	53	25	164	25	551	59.4	9.13	711.43	25	Not Found	High	High	High	High	High	High	High	Not Found	High	High	High	High	High	High	High	Not Found	High	High	High	High	High	High	High	1	0		0		Deamidated [R198; Q254]
High	Master Protein	A0A072TLZ7	Lipoxygenase OS=Medicago truncatula GN=MTR_8g018735 PE=3 SV=1	0	365.478	55	44	256	25	865	96.9	6.37	1088.36	44	Not Found	High	High	High	High	High	High	High	Not Found	High	High	High	High	High	High	High	Not Found	High	High	High	High	High	High	High	1	0		0		Deamidated [Q486]
High	Master Protein	G7IDL5	Acetyl-CoA carboxylase, putative OS=Medicago truncatula GN=MTR_1g071610 PE=4 SV=1	0	242.88	48	24	123	24	743	81.8	6.84	570.03	24	Not Found	High	High	High	High	High	High	High	Not Found	Not Found	High	High	High	High	High	High	Not Found	High	High	High	High	High	High	High	1	0		0		Deamidated [R585]
High	Master Protein	A0A072U270	Feronia receptor-like kinase OS=Medicago truncatula GN=MTR_7g073660 PE=4 SV=1	0	231.066	37	28	100	24	899	97.9	6.3	432.21	28	Not Found	High	High	High	High	High	High	High	Not Found	High	High	High	High	High	High	High	Not Found	High	Not Found	High	High	High	High	High	1	0		0		Deamidated [Q95; Q385]
High	Master Protein	A0A072U6J8	ABC transporter B family protein OS=Medicago truncatula GN=MTR_6g011680 PE=4 SV=1	0	195.448	27	28	96	24	1250	136.3	8.02	365.84	28	Not Found	Not Found	High	High	High	High	High	High	Not Found	High	High	High	High	High	High	High	High	High	High	High	High	High	High	High	1	0		0		Deamidated [Q253; Q501; Q506; Q1146; Q1151; Q1225]; Carboxymethyl [K507; K1152]
High	Master Protein	G7LE78	LRR receptor-like kinase OS=Medicago truncatula GN=MTR_8g107470 PE=4 SV=2	0	233.086	44	30	195	24	666	72.1	7.21	757.25	30	Not Found	High	High	High	High	High	High	High	Not Found	High	High	High	High	High	High	High	Not Found	High	High	High	High	High	High	High	1	0		0		Deamidated [R585]
High	Master Protein	G7JPD1	Protein disulfide-isomerase OS=Medicago truncatula GN=MTR_4g059450 PE=3 SV=1	0	185.906	42	27	89	24	583	65.1	4.77	370.71	27	High	High	High	High	High	High	High	High	Not Found	High	High	High	High	High	High	High	Not Found	High	High	High	High	High	High	High	1	0		0
High	Master Protein	G7KFV1	UTP-glucose-1-phosphate uridylyltransferase OS=Medicago truncatula GN=MTR_5g077000 PE=4 SV=1	0	193.744	70	25	96	24	470	51.4	5.4	409.65	25	Not Found	Not Found	High	High	High	High	High	High	Not Found	Not Found	High	High	High	High	High	High	Not Found	High	High	High	High	High	High	High	1	0		0
High	Master Protein	B7FMK2	Archaeal/vacuolar-type H+-ATPase subunit E OS=Medicago truncatula GN=MTR_5g009720 PE=2 SV=1	0	148.832	65	24	172	24	230	26.4	7.02	612.43	24	High	High	High	High	High	High	High	High	High	High	High	High	High	High	High	High	High	High	High	High	High	High	High	High	1	0		0
High	Master Protein	A0A072VNA3	Glycerol-3-phosphate dehydrogenase OS=Medicago truncatula GN=MTR_1g094185 PE=3 SV=1	0	163.544	33	26	146	24	626	68.4	8.13	544.29	26	Not Found	High	High	High	High	High	High	High	Not Found	Not Found	High	High	High	High	High	High	Not Found	Not Found	High	High	High	High	High	High	1	0		0
High	Master Protein	G7KB73	Annexin OS=Medicago truncatula GN=MTR_5g063670 PE=2 SV=1	0	154.887	55	24	107	24	316	36.1	7.61	383.79	24	High	High	High	High	High	High	High	High	Not Found	High	High	High	High	High	High	High	High	High	High	High	High	High	High	High	1	0		0		Deamidated [R146]
High	Master Protein	G7JYY7	Glutamate-glyoxylate aminotransferase OS=Medicago truncatula GN=MTR_5g033230 PE=4 SV=1	0	179.038	43	24	140	24	481	53.7	6.04	575.43	24	Not Found	High	High	High	High	High	High	High	Not Found	Not Found	High	High	High	High	High	High	Not Found	Not Found	High	High	High	High	High	High	1	0		0
High	Master Protein	G7J7N5	ATP-dependent zinc metalloprotease FTSH protein OS=Medicago truncatula GN=MTR_3g104470 PE=3 SV=1	0	285.05	42	29	138	24	707	76.6	8.38	643.42	29	High	High	High	High	High	High	High	High	High	High	High	High	High	High	High	High	High	High	High	High	High	High	High	High	1	0		0
High	Master Protein	A0A072U6I0	SPFH/band 7/PHB domain membrane-associated family protein OS=Medicago truncatula GN=MTR_6g011380 PE=4 SV=1	0	291.542	55	30	353	24	286	31.3	5.43	1475.14	30	High	High	High	High	High	High	High	High	High	High	High	High	High	High	High	High	High	High	High	High	High	High	High	High	1	0		0		Deamidated [R94; Q96; Q120; Q208; R215; Q273; Q280]
High	Master Protein	G7JI82	Bacterial long-chain fatty acid CoA synthetase OS=Medicago truncatula GN=MTR_3g082660 PE=4 SV=1	0	211.529	35	25	164	24	727	79.4	7.49	648.84	25	High	High	High	High	High	High	High	High	High	High	High	High	High	High	High	High	High	High	High	High	High	High	High	High	1	0		0
High	Master Protein	A0A072U2G7	NAD-dependent aldehyde dehydrogenase family protein OS=Medicago truncatula GN=MTR_8g064170 PE=3 SV=1	0	208.409	46	31	195	24	541	58.6	7.77	664.22	31	High	High	High	High	High	High	High	High	High	High	High	High	High	High	High	High	High	High	High	High	High	High	High	High	1	0		0		Deamidated [R413]
High	Master Protein	G7L3V6	ABC transporter B family protein OS=Medicago truncatula GN=MTR_7g102070 PE=4 SV=2	0	236.899	30	42	121	24	1338	146.6	7.4	446.83	42	Not Found	High	High	High	High	Not Found	High	High	Not Found	High	High	High	High	High	High	High	Not Found	High	High	High	High	High	High	High	1	1	Phospho [S692]	0		Carboxymethyl [K1225]; Deamidated [Q1130; Q1219; Q1224]; Phospho [S692]
High	Master Protein	A0A072U5F0	Translational activator GCN1-like protein OS=Medicago truncatula GN=MTR_7g116425 PE=4 SV=1	0	94.953	9	24	62	24	2632	287.5	7.09	180.35	24	High	High	High	High	High	High	High	High	High	High	High	High	High	High	High	High	High	High	High	High	High	High	High	High	1	2	Phospho [S1729; S1822]	0		Phospho [S1729; S1822]; Deamidated [R1728]
High	Master Protein	A0A072VS77	Methylenetetrahydrofolate reductase OS=Medicago truncatula GN=MTR_1g040105 PE=3 SV=1	0	167.31	41	24	92	24	595	66.9	6.02	359.25	24	Not Found	High	High	High	High	High	High	High	Not Found	High	High	High	High	High	High	High	Not Found	High	High	High	High	High	High	High	1	0		0		Deamidated [Q106; Q443]
High	Master Protein	G7K465	LRR ribonuclease inhibitor domain protein OS=Medicago truncatula GN=MTR_5g035590 PE=4 SV=1	0	164.296	45	23	86	23	606	64.9	8.62	387.2	23	High	High	High	High	High	High	High	High	Not Found	High	High	High	High	High	High	High	High	Not Found	High	High	High	High	High	High	1	0		0
High	Master Protein	G7LGQ5	Processing peptidase OS=Medicago truncatula GN=MTR_8g014660 PE=3 SV=1	0	255.884	38	24	200	23	507	54.8	5.55	804.82	24	High	High	High	High	High	High	High	High	High	High	High	High	High	High	High	High	High	High	High	High	High	High	High	High	1	0		0		Deamidated [Q417]
High	Master Protein	A0A072UQA3	26S proteasome regulatory particle triple-A ATPase protein OS=Medicago truncatula GN=MTR_4g094270 PE=3 SV=1	0	193.565	64	24	109	23	417	47.1	8.76	499.31	24	High	High	High	High	High	High	High	High	Not Found	High	High	High	High	High	High	High	Not Found	Not Found	High	High	High	High	High	High	1	0		0
High	Master Protein	G7IEC9	RAN GTPase activating protein OS=Medicago truncatula GN=MTR_1g072250 PE=4 SV=1	0	182.734	49	23	119	23	533	57.8	4.65	512.3	23	High	High	High	High	High	High	High	High	High	High	High	High	High	High	High	High	High	High	High	High	High	High	High	High	1	2	Phospho [S163; S519]	0		Phospho [S163; S519]
High	Master Protein	S4T074	Photosystem II CP47 reaction center protein OS=Medicago truncatula GN=psbB PE=3 SV=1	0	753.214	47	37	1071	23	508	56	6.77	4554.3	37	High	High	High	High	High	High	High	High	High	High	High	High	High	High	High	High	High	High	High	High	High	High	High	High	1	4	Phospho [S297; S299; S329; T436]	0		Deamidated [Q274; Q277; Q281; Q296; R347; Q394; R423; Q425; R434; Q489]; Phospho [S297; S299; S329; T436]; Carboxymethyl [K418]
High	Master Protein	G7IBY1	60S ribosomal protein L3B OS=Medicago truncatula GN=MTR_1g098540 PE=3 SV=2	0	252.225	63	39	310	23	389	44.5	10.18	985.88	39	High	High	High	High	High	High	High	High	High	High	High	High	High	High	High	High	High	High	High	High	High	High	High	High	1	0		0		Deamidated [Q185; Q193; Q213; Q272; R278]
High	Master Protein	G7LGE3	Transducin/WD40 repeat protein OS=Medicago truncatula GN=MTR_8g079820 PE=4 SV=2	0	121.074	17	23	44	23	1616	175.8	8.27	170.3	23	Not Found	Not Found	High	High	High	High	High	High	Not Found	High	High	High	Not Found	High	High	High	Not Found	High	High	High	High	High	High	High	1	0		0
High	Master Protein	G7LIY0	Lipoxygenase OS=Medicago truncatula GN=MTR_8g018550 PE=3 SV=1	0	325.043	42	37	174	23	868	97.7	6.29	740.59	37	High	High	High	High	High	High	High	High	High	High	High	High	High	High	High	High	High	Not Found	High	High	High	High	High	High	1	0		0		Carboxymethyl [K403]; Deamidated [Q402]
High	Master Protein	G7JJ67	Calmodulin-domain kinase CDPK protein OS=Medicago truncatula GN=MTR_4g132070 PE=4 SV=1	0	188.439	50	27	119	23	539	60.5	6.6	482.95	27	High	High	High	High	High	High	High	High	High	High	High	High	High	High	High	High	Not Found	High	High	High	High	High	High	High	1	3	Phospho [S22; S23; S426]	0		Phospho [S22; S23; S426]
High	Master Protein	G7JJV9	Fructose-bisphosphate aldolase OS=Medicago truncatula GN=MTR_4g071860 PE=3 SV=1	0	215.632	54	24	255	23	400	43.2	7.3	960.67	24	High	High	High	High	High	High	High	High	High	High	High	High	High	High	High	High	High	High	High	High	High	High	High	High	1	0		0		Deamidated [R189; Q218]
High	Master Protein	G7I565	Arabinose kinase-like protein OS=Medicago truncatula GN=MTR_1g009190 PE=4 SV=1	0	166.646	27	23	75	23	992	108.7	6.87	270.63	23	Not Found	High	High	High	High	High	High	High	Not Found	High	High	High	High	High	High	High	Not Found	High	High	High	High	High	High	High	1	1	Phospho [S979]	0		Phospho [S979]
High	Master Protein	A9YWS0	Serine hydroxymethyltransferase OS=Medicago truncatula GN=MTR_5g030950 PE=3 SV=1	0	268.196	63	32	218	23	518	57.4	8.31	857.87	32	Not Found	High	High	High	High	High	High	High	High	High	High	High	High	High	High	High	High	High	High	High	High	High	High	High	1	0		0		Deamidated [Q481; Q487]
High	Master Protein	G7KJH1	Alpha-mannosidase OS=Medicago truncatula GN=MTR_6g008850 PE=3 SV=2	0	127.043	22	24	76	23	1150	132	7.91	259.26	24	High	High	High	High	High	High	High	High	Not Found	Not Found	High	High	High	High	High	High	Not Found	High	High	High	High	High	High	High	1	0		0
High	Master Protein	G7IN22	Actin filament bundling protein P-115-ABP OS=Medicago truncatula GN=MTR_2g036860 PE=4 SV=2	0	146.491	28	23	67	23	962	107.2	5.8	261.42	23	High	Not Found	High	High	High	High	High	High	High	High	High	High	High	High	High	High	High	High	High	High	High	High	High	High	1	0		0		Deamidated [Q178]
High	Master Protein	B6DXD7	Vacuolar H+-translocating inorganic pyrophosphatase OS=Medicago truncatula GN=VP1 PE=2 SV=1	0	286.632	22	24	370	23	765	80.1	5.27	1580.56	24	High	High	High	High	High	High	High	High	High	High	High	High	High	High	High	High	High	High	High	High	High	High	High	High	1	0		0		Deamidated [R42; R264]; Carboxymethyl [K73]
High	Master Protein	A0A072VFQ6	ATP-dependent zinc metalloprotease FTSH protein OS=Medicago truncatula GN=MTR_1g028390 PE=3 SV=1	0	145.067	35	23	106	22	778	85.7	6.64	456.21	23	Not Found	High	High	High	High	High	High	High	Not Found	High	High	High	High	High	High	High	Not Found	High	High	High	High	High	High	High	1	0		0
High	Master Protein	Q2HVW5	Nucleoporin interacting component, putative OS=Medicago truncatula GN=MTR_2g103370 PE=4 SV=1	0	94.551	25	22	47	22	859	95.9	6.84	156.43	22	Not Found	High	Not Found	High	High	High	High	High	Not Found	High	High	High	High	High	High	High	Not Found	High	High	High	Not Found	High	High	High	1	0		0
High	Master Protein	A0A072UVE5	Nicalin OS=Medicago truncatula GN=MTR_4g052530 PE=3 SV=1	0	180.592	41	22	104	22	564	62.2	6.55	390.3	22	Not Found	High	High	High	High	High	High	High	Not Found	High	High	High	High	High	High	High	Not Found	High	High	High	High	High	High	High	1	0		0		Deamidated [Q296; Q337; Q352]
High	Master Protein	A0A072VJS5	Pyridine nucleotide-disulfide oxidoreductase OS=Medicago truncatula GN=MTR_1g060620 PE=4 SV=1	0	158.782	59	22	115	22	434	47	6.02	423.77	22	High	High	High	High	High	High	High	High	Not Found	High	High	High	High	High	High	High	Not Found	High	High	High	High	High	High	High	1	0		0
High	Master Protein	A0A072TZF0	Carboxy-terminal region remorin OS=Medicago truncatula GN=MTR_8g031370 PE=4 SV=1	0	223.738	72	23	217	22	200	21.6	8.73	914.23	23	High	High	High	High	High	High	High	High	High	High	High	High	High	High	High	High	High	High	High	High	High	High	High	High	1	1	Phospho [S76]	0		Deamidated [Q8; R79]; Phospho [S76]
High	Master Protein	B7FN18	Adenylate kinase OS=Medicago truncatula GN=MTR_4g103800 PE=2 SV=1	0	180.714	60	22	186	22	243	26.7	7.81	787.78	22	High	High	High	High	High	High	High	High	High	High	High	High	High	High	High	High	High	High	High	High	High	High	High	High	1	0		0
High	Master Protein	G7KYC0	Glyceraldehyde-3-phosphate dehydrogenase OS=Medicago truncatula GN=MTR_7g084800 PE=3 SV=1	0	341.73	58	30	483	22	404	43	8.27	2117.02	30	High	High	High	High	High	High	High	High	High	High	High	High	High	High	High	High	High	High	High	High	High	High	High	High	1	0		0		Carboxymethyl [K241]; Deamidated [Q254; R331]
High	Master Protein	G7KGF6	Zincin-like metalloprotease family protein OS=Medicago truncatula GN=MTR_5g030940 PE=3 SV=2	0	122.688	30	22	60	22	786	88.7	6.28	239.6	22	High	High	High	High	High	High	High	Not Found	Not Found	High	High	High	High	High	High	High	Not Found	High	High	High	High	High	High	High	1	0		0
High	Master Protein	G7J2M9	CBS/octicosapeptide/phox/Bemp1 (PB1) domain protein OS=Medicago truncatula GN=MTR_3g097010 PE=4 SV=1	0	333.213	57	26	250	22	519	55.8	6.71	1127.79	26	High	High	High	High	High	High	High	High	Not Found	High	High	High	High	High	High	High	High	High	High	High	High	High	High	High	1	1	Phospho [S25]	0		Deamidated [Q29; Q399; R431]; Carboxymethyl [K198]; Phospho [S25]
High	Master Protein	G7K2L1	Plant intracellular ras group-related LRR protein OS=Medicago truncatula GN=MTR_5g024780 PE=4 SV=1	0	146.038	39	23	102	22	585	64.5	6.33	384.54	23	Not Found	High	High	High	High	High	High	High	Not Found	Medium	High	High	High	High	High	High	Not Found	Medium	High	High	High	High	High	High	1	0		0
High	Master Protein	A0A072VDB9	Gamma carbonic anhydrase-like protein OS=Medicago truncatula GN=MTR_3g112020 PE=4 SV=1	0	349.539	75	24	296	22	272	29.3	6.81	1639.48	24	High	High	High	High	High	High	High	High	High	High	High	High	High	High	High	High	High	High	High	High	High	High	High	High	1	1	Phospho [T97]	0		Deamidated [Q13; Q100]; Phospho [T97]
High	Master Protein	G7JVH4	Porin/voltage-dependent anion-selective channel protein OS=Medicago truncatula GN=MTR_4g128300 PE=4 SV=1	0	243.367	71	23	252	22	279	30	9.17	1096.3	23	High	High	High	High	High	High	High	High	High	High	High	High	High	High	High	High	High	High	High	High	High	High	High	High	1	0		0
High	Master Protein	G7K8Y3	Formate-tetrahydrofolate ligase OS=Medicago truncatula GN=MTR_5g059390 PE=3 SV=2	0	154.59	37	22	82	22	627	66.6	6.8	306.57	22	Not Found	High	High	High	High	High	High	High	High	High	High	High	High	High	High	High	High	High	High	High	High	High	High	High	1	0		0
High	Master Protein	A0A072U338	Phosphopyruvate hydratase OS=Medicago truncatula GN=MTR_7g103620 PE=3 SV=1	0	276.368	68	25	136	22	444	47.8	5.8	667.23	25	Not Found	High	High	High	High	High	High	High	Not Found	High	High	High	High	High	High	High	Not Found	High	High	High	High	High	High	High	1	0		0		Deamidated [Q85; Q418]
High	Master Protein	A0A072VL01	Succinate-CoA ligase subunit beta OS=Medicago truncatula GN=MTR_1g069645 PE=3 SV=1	0	167.458	53	22	116	22	421	45.1	5.91	454.23	22	High	High	High	High	High	High	High	High	High	High	High	High	High	High	High	High	High	High	High	High	High	High	High	High	1	0		0
High	Master Protein	A0A072U9H4	Chlorophyll a-b binding protein, chloroplastic OS=Medicago truncatula GN=MTR_6g060175 PE=3 SV=1	0	370.547	47	22	489	22	289	31	6	2093.88	22	High	High	High	High	High	High	High	High	High	High	High	High	High	High	High	High	High	High	High	High	High	High	High	High	1	0		0		Deamidated [R77; Q120; Q226; R285]; Carboxymethyl [K70; K208]
High	Master Protein	G7JNF4	Calcium-dependent lipid-binding (CaLB domain) family protein OS=Medicago truncatula GN=MTR_4g073400 PE=4 SV=1	0	172.838	41	23	140	22	537	61.3	6.77	560.13	23	High	High	High	High	High	High	High	High	High	High	High	High	High	High	High	High	High	High	High	High	High	High	High	High	1	0		0
High	Master Protein	A0A072V3E2	Senescence-associated E3 ubiquitin ligase OS=Medicago truncatula GN=MTR_3g115670 PE=4 SV=1	0	204.969	26	22	96	22	814	89.4	5.4	546.02	22	High	High	High	High	High	High	High	High	High	High	High	High	High	High	High	High	High	High	High	High	High	High	High	High	1	0		0		Deamidated [Q484; Q504]
High	Master Protein	G7IUM1	ATP-dependent zinc metalloprotease FTSH protein OS=Medicago truncatula GN=MTR_2g101290 PE=4 SV=1	0	137.68	28	22	50	22	881	100.1	9.26	206.82	22	Medium	High	High	High	High	High	High	High	Not Found	High	Not Found	High	High	High	Not Found	High	High	High	Not Found	High	High	High	High	High	1	0		0
High	Master Protein	G7L8S9	Leucine zipper EF-hand transmembrane protein OS=Medicago truncatula GN=MTR_8g088580 PE=4 SV=2	0	182.066	36	25	114	22	724	82.3	5.77	416.9	25	High	High	High	High	High	High	High	High	High	Not Found	High	High	High	High	High	High	High	Not Found	High	High	High	High	High	High	1	0		0
High	Master Protein	G7JT26	Extracellular calcium sensing receptor OS=Medicago truncatula GN=MTR_4g112530 PE=4 SV=2	0	247.479	55	22	370	22	392	41.6	9.51	1559.45	22	High	High	High	High	High	High	High	High	High	High	High	High	High	High	High	High	High	High	High	High	High	High	High	High	1	3	Phospho [S145; S146; T378]	0		Deamidated [Q118; Q119; Q122; Q140; Q144; Q151; Q162]; Phospho [S145; S146; T378]
High	Master Protein	G7K2Q8	Threonyl-tRNA synthetase/threonine-tRNA ligase, putative OS=Medicago truncatula GN=MTR_5g034820 PE=3 SV=1	0	121.989	33	21	35	21	711	82	7.02	145.6	21	Not Found	High	Not Found	High	High	High	High	High	Not Found	High	Not Found	High	High	High	High	High	Not Found	High	High	High	High	High	Not Found	High	1	0		0
High	Master Protein	G7ICX7	Calcium-dependent phosphotriesterase superfamily protein OS=Medicago truncatula GN=MTR_1g086990 PE=4 SV=1	0	182.907	48	21	116	21	327	35.7	8.13	505	21	High	High	High	High	High	High	High	High	Not Found	High	High	High	High	High	High	High	Not Found	High	High	High	High	High	High	High	1	0		0
High	Master Protein	G7KDJ3	Succinate dehydrogenase [ubiquinone] flavoprotein subunit, mitochondrial OS=Medicago truncatula GN=MTR_5g020050 PE=3 SV=1	0	115.556	35	21	83	21	626	68.9	6.57	319.28	21	Not Found	High	High	High	High	High	High	High	Not Found	High	High	High	High	High	High	High	Not Found	High	High	High	High	High	High	High	1	0		0
High	Master Protein	G7JAI2	ATP synthase, F0 subunit B OS=Medicago truncatula GN=MTR_3g106820 PE=2 SV=1	0	371.24	53	21	370	21	209	23	5.8	2118.97	21	High	High	High	High	High	High	High	High	High	High	High	High	High	High	High	High	High	High	High	High	High	High	High	High	1	0		0		Deamidated [Q129; R135; Q147; Q172; Q181; Q192; Q198]; Carboxymethyl [K149]
High	Master Protein	G7JL66	Methylcrotonyl-CoA carboxylase beta chain, putative OS=Medicago truncatula GN=MTR_4g085890 PE=4 SV=1	0	167.836	39	21	84	21	552	59.7	8.37	340.61	21	Not Found	High	High	High	High	High	High	High	Not Found	Not Found	High	High	High	High	High	High	Not Found	Not Found	High	High	High	High	High	High	1	0		0		Deamidated [Q290]
High	Master Protein	A0A072UL06	Dolichyl-diphosphooligosaccharide--protein glycosyltransferase 48 kDa subunit OS=Medicago truncatula GN=MTR_4g069240 PE=3 SV=1	0	134.548	40	21	148	21	434	48.3	6.29	526.79	21	High	High	High	High	High	High	High	High	Not Found	Not Found	High	High	High	High	High	High	High	High	High	High	High	High	High	High	1	0		0		Deamidated [Q74; R380]
High	Master Protein	G7JLT3	Uncharacterized protein OS=Medicago truncatula GN=MTR_4g014600 PE=4 SV=1	0	139.82	37	21	95	21	512	60	8.69	390.41	21	High	High	High	High	High	High	High	High	High	High	High	High	High	High	High	High	High	Not Found	High	High	High	High	High	High	1	0		0
High	Master Protein	A0A072V2R0	Dihydrolipoyl dehydrogenase OS=Medicago truncatula GN=MTR_4g123070 PE=4 SV=1	0	210.643	48	21	132	21	502	53.2	7.36	566.33	21	Not Found	High	High	High	High	High	High	High	Not Found	High	High	High	High	High	High	High	Not Found	High	High	High	High	High	High	High	1	0		0
High	Master Protein	Q7X9B3	9/13 hydroperoxide lyase OS=Medicago truncatula GN=hpl1 PE=2 SV=1	0	195.693	44	23	103	21	482	53.9	6.61	452.03	23	Not Found	High	High	High	High	High	High	High	Not Found	High	High	High	High	High	High	High	Not Found	Medium	High	High	High	High	High	High	1	0		0
High	Master Protein	G7JEF5	NDH-dependent cyclic electron flow protein OS=Medicago truncatula GN=MTR_4g007080 PE=4 SV=1	0	179.401	35	21	154	21	472	52.6	6.64	590.28	21	High	High	High	High	High	High	High	High	High	High	High	High	High	High	High	High	High	High	High	High	High	High	High	High	1	0		0
High	Master Protein	Q2MJ09	Coumarate 4-hydroxylase OS=Medicago truncatula GN=CYP73A3 PE=2 SV=1	0	150.941	40	21	102	21	506	58.1	9.04	376.56	21	Not Found	High	High	High	High	High	High	High	Not Found	High	High	High	Not Found	High	High	High	Not Found	High	High	High	High	High	High	High	1	0		0		Deamidated [R437]
High	Master Protein	A0A072VRW6	Uncharacterized protein OS=Medicago truncatula GN=MTR_1g115610 PE=4 SV=1	0	127.026	35	21	65	21	682	77	5.11	265.81	21	High	High	High	High	High	High	High	High	High	High	High	High	High	High	High	High	High	High	High	High	High	High	High	High	1	0		0		Deamidated [R393]
High	Master Protein	A0A072V2S7	Cation-transporting ATPase OS=Medicago truncatula GN=MTR_3g097560 PE=3 SV=1	0	86.439	16	21	73	21	1191	131.7	8.35	220.12	21	Not Found	High	High	High	High	High	High	High	High	High	High	High	High	High	High	High	Not Found	High	High	High	High	High	High	High	1	0		0
High	Master Protein	G7IBH6	Aminoacylase OS=Medicago truncatula GN=MTR_1g038920 PE=3 SV=2	0	149.978	52	22	123	21	449	50.2	6.55	445.27	22	High	High	High	High	High	High	High	High	Not Found	High	High	High	High	High	High	High	Not Found	High	High	High	High	High	High	High	1	0		0
High	Master Protein	G7J6H9	Phosphatidylinositol 4-kinase alpha OS=Medicago truncatula GN=MTR_3g116250 PE=3 SV=2	0	122.657	12	21	53	21	2035	223.8	6.32	194.4	21	High	Not Found	High	High	High	High	High	High	High	Not Found	High	High	High	High	High	High	High	Not Found	Not Found	High	High	High	High	High	1	0		0
High	Master Protein	G7IV48	26S protease regulatory subunit 6B OS=Medicago truncatula GN=MTR_3g062510 PE=3 SV=1	0	165.376	48	22	131	21	415	46.4	5.59	457.1	22	Not Found	High	High	High	High	High	High	High	Not Found	High	High	High	High	High	High	High	High	High	High	High	High	High	High	High	1	0		0
High	Master Protein	Q2HTY1	FAD-dependent pyridine nucleotide-disulphide oxidoreductase; Calcium-binding EF-hand OS=Medicago truncatula GN=MTR_4g091240 PE=4 SV=1	0	151.822	34	25	115	21	578	65.4	8.02	385	25	High	High	High	High	High	High	High	High	High	High	High	High	High	High	High	High	High	High	High	High	High	High	High	High	1	0		0
High	Master Protein	G7IT31	ABC transporter D family protein OS=Medicago truncatula GN=MTR_2g062790 PE=4 SV=2	0	152.927	35	21	76	21	744	83.7	5.77	270.12	21	Not Found	High	High	High	High	High	High	High	Not Found	High	High	High	High	High	High	High	Not Found	High	High	High	High	High	High	High	1	0		0		Deamidated [Q460]
High	Master Protein	G7IBL3	Syntaxin of plants protein OS=Medicago truncatula GN=MTR_1g066460 PE=3 SV=1	0	202.553	60	21	167	21	265	29.9	5.4	705.85	21	Not Found	High	High	High	High	High	High	High	Not Found	High	High	High	High	High	High	High	High	High	High	High	High	High	High	High	1	0		0
High	Master Protein	A0A072U201	Elongation factor Tu OS=Medicago truncatula GN=MTR_7g094460 PE=3 SV=1	0	217.512	53	23	158	21	449	48.9	6.87	645.69	23	Not Found	High	High	High	High	High	High	High	Not Found	High	High	High	High	High	High	High	Not Found	High	High	High	High	High	High	High	1	0		0
High	Master Protein	A0A072VB05	MORN domain protein OS=Medicago truncatula GN=MTR_2g084835 PE=4 SV=1	0	207.434	31	21	109	21	843	97.2	4.98	478.21	21	High	High	High	High	High	High	High	High	High	High	High	High	High	High	High	High	High	High	High	High	High	High	High	High	1	0		0
High	Master Protein	G7J0C1	WPP domain interacting protein, putative OS=Medicago truncatula GN=MTR_3g009740 PE=4 SV=1	0	213.87	42	21	98	21	575	62.6	4.93	469.26	21	High	High	High	High	High	High	High	High	Not Found	High	High	High	High	High	High	High	Not Found	High	High	High	High	High	High	High	1	0		0		Deamidated [Q411]
High	Master Protein	G7KW90	Vacuolar H+-ATPase subunit C OS=Medicago truncatula GN=MTR_7g083720 PE=4 SV=1	0	143.049	51	21	88	21	378	42.8	5.77	342.19	21	Not Found	High	High	High	High	High	High	High	High	High	High	High	High	High	High	High	High	High	High	High	High	High	High	High	1	0		0
High	Master Protein	A0A072V1U6	DnaJ heat shock amino-terminal domain protein OS=Medicago truncatula GN=MTR_4g112045 PE=4 SV=1	0	166.527	13	21	45	21	2636	288	6.23	204.46	21	High	Not Found	Not Found	High	High	High	High	High	Not Found	High	Not Found	High	High	High	High	High	High	High	Not Found	High	High	High	High	High	1	0		0
High	Master Protein	G7IRR6	Protein disulfide-isomerase OS=Medicago truncatula GN=MTR_2g094180 PE=3 SV=1	0	152.33	39	24	97	21	564	63	4.83	348.52	24	High	High	High	High	High	High	High	High	Not Found	High	High	High	High	High	High	High	High	High	High	High	High	High	High	High	1	0		0
High	Master Protein	G7IT86	Phosphoglycerate kinase OS=Medicago truncatula GN=MTR_2g066120 PE=3 SV=1	0	189.08	69	24	147	21	401	42.4	6.01	530.52	24	High	High	High	High	High	High	High	High	High	High	High	High	High	High	High	High	High	High	High	High	High	High	High	High	1	0		0
High	Master Protein	G7JU55	Drug resistance transporter-like ABC domain protein OS=Medicago truncatula GN=MTR_4g113070 PE=3 SV=2	0	136.047	16	23	79	20	1418	161.3	8.37	264.12	23	High	High	High	High	High	High	High	High	Not Found	High	High	High	High	High	High	High	High	High	High	High	High	High	High	High	1	1	Phospho [S14]	0		Phospho [S14]
High	Master Protein	G7K2D0	Photosystem I reaction center subunit II OS=Medicago truncatula GN=MTR_5g006130 PE=2 SV=1	0	427.459	72	28	808	20	209	23	9.57	3306.56	28	High	High	High	High	High	High	High	High	High	High	High	High	High	High	High	High	High	High	High	High	High	High	High	High	1	2	Phospho [T69; T202]	0		Carboxymethyl [K58; K107; K129; K168]; Deamidated [R91; Q94; Q109; R122; R155; Q163; R180; Q181; Q185; R188; Q205]; Phospho [T69; T202]
High	Master Protein	Q2MJ19	Cytochrome P450 family 709 protein OS=Medicago truncatula GN=CYP72A68 PE=2 SV=1	0	160.939	33	21	102	20	520	59.9	9.07	404.43	21	Medium	High	High	High	High	High	High	High	Not Found	High	High	High	High	High	High	High	Not Found	High	High	High	High	High	High	High	1	1	Phospho [T286]	0		Deamidated [Q264; R300]; Carboxymethyl [K281]; Phospho [T286]
High	Master Protein	A0A072U3K0	Legumin A2 OS=Medicago truncatula GN=MTR_7g097000 PE=3 SV=1	0	339.023	50	31	315	20	531	60.8	7.03	1357.74	31	High	High	High	High	High	High	High	High	High	High	High	High	High	High	High	High	High	High	High	High	High	High	High	High	1	0		0		Deamidated [Q216; Q227; Q241; Q452]
High	Master Protein	G7ISM5	Enhancer of mRNA-decapping-like protein OS=Medicago truncatula GN=MTR_2g027690 PE=4 SV=2	0	113.839	20	21	38	20	1378	150.3	5.91	151.27	21	High	High	High	High	High	Not Found	Not Found	High	Not Found	High	High	High	High	High	High	High	High	High	High	High	High	High	High	High	1	0		0
High	Master Protein	G7K028	Phosphoinositide phosphatase SAC1 OS=Medicago truncatula GN=MTR_5g023960 PE=4 SV=2	0	162.357	33	21	67	20	596	67.8	7.87	304.45	21	High	Medium	Not Found	Not Found	High	High	High	High	High	Not Found	Not Found	High	High	High	High	High	Not Found	Not Found	High	High	High	High	High	High	1	0		0
High	Master Protein	G7J486	Elongation factor Tu OS=Medicago truncatula GN=MTR_3g076660 PE=3 SV=1	0	181.934	42	20	121	20	489	53.2	6.65	455.67	20	High	High	High	High	High	High	High	High	High	High	High	High	High	High	High	High	High	High	High	High	High	High	High	High	1	0		0
High	Master Protein	G7I7V6	Glycerol-3-phosphate dehydrogenase OS=Medicago truncatula GN=MTR_1g050720 PE=3 SV=1	0	195.701	34	22	155	20	626	68.2	8.31	674.23	22	Not Found	Not Found	High	High	High	High	High	High	Not Found	Not Found	High	High	High	High	High	High	Not Found	Not Found	High	High	High	High	High	High	1	0		0		Deamidated [R417]
High	Master Protein	A0A072V8Z3	Adenylate kinase OS=Medicago truncatula GN=MTR_2g461290 PE=3 SV=1	0	125.414	39	20	55	20	593	66.4	8.06	196.37	20	High	Not Found	Not Found	High	High	High	High	High	Not Found	High	High	High	High	High	High	High	High	High	High	High	High	High	High	High	1	0		0
High	Master Protein	G7JYX4	ABC transporter B family protein OS=Medicago truncatula GN=MTR_5g033080 PE=4 SV=2	0	152.854	40	20	93	20	526	59.1	7.03	399.97	20	Not Found	High	High	High	High	High	High	High	Not Found	High	High	High	High	High	High	High	Not Found	High	High	High	High	High	High	High	1	0		0
High	Master Protein	G7IR51	Plant/MXC17-8 protein OS=Medicago truncatula GN=MTR_2g081000 PE=4 SV=1	0	145.135	36	20	71	20	526	57.5	9.1	283.02	20	High	High	High	High	High	High	High	High	High	High	High	High	High	High	High	High	High	High	High	High	High	High	High	High	1	0		0
High	Master Protein	G7JTX3	26S proteasome regulatory subunit S2 1B OS=Medicago truncatula GN=MTR_4g078780 PE=4 SV=1	0	167.539	24	20	58	20	886	97.2	5.24	264.11	20	High	High	High	High	High	High	High	High	High	High	Not Found	High	High	High	High	High	High	Not Found	High	High	High	High	High	High	1	0		0		Deamidated [Q825]
High	Master Protein	G7KEN6	Heat shock protein 81-2 OS=Medicago truncatula GN=MTR_5g097320 PE=3 SV=1	0	170.77	39	29	107	20	792	90	5.48	369.81	29	High	High	High	High	High	High	High	High	High	Medium	High	High	High	High	High	Not Found	High	Not Found	High	High	High	High	High	High	1	0		0
High	Master Protein	G7J629	Lipoxygenase OS=Medicago truncatula GN=MTR_3g079420 PE=3 SV=2	0	142.68	28	24	65	20	865	99.4	5.96	234.08	24	High	High	High	High	High	High	High	High	Not Found	High	High	High	High	Not Found	High	High	Not Found	High	High	High	High	Not Found	High	High	1	0		0
High	Master Protein	G7J8V4	Unusual kinase, putative OS=Medicago truncatula GN=MTR_3g082750 PE=4 SV=1	0	112.656	22	20	80	20	708	80.4	9.14	289.78	20	Not Found	High	High	High	High	High	High	Not Found	Not Found	High	High	High	High	High	High	High	Not Found	Not Found	High	High	High	High	High	High	1	0		0
High	Master Protein	G7KFE0	LRR receptor-like kinase OS=Medicago truncatula GN=MTR_5g098970 PE=4 SV=2	0	182.608	43	20	132	20	524	59.4	7.01	663.14	20	Not Found	High	High	High	High	High	High	High	Not Found	High	High	High	High	High	High	High	Not Found	High	High	High	High	High	High	High	1	1	Phospho [S242]	0		Phospho [S242]
High	Master Protein	A0A072TQ03	Calcium-dependent lipid-binding (CaLB domain) family protein OS=Medicago truncatula GN=MTR_8g031270 PE=4 SV=1	0	151.926	27	23	75	20	1003	114.3	9.09	338.06	23	Not Found	High	High	High	High	High	High	High	Not Found	Not Found	High	High	High	High	High	High	Not Found	Not Found	High	High	High	High	High	High	1	0		0
High	Master Protein	G7L9S9	Cytoplasmic phosphoglucomutase OS=Medicago truncatula GN=MTR_8g104540 PE=3 SV=1	0	152.738	39	20	76	20	582	63.2	5.68	291.12	20	Not Found	High	High	High	Not Found	High	High	High	Not Found	High	High	High	High	High	High	High	Not Found	High	High	High	High	High	High	High	1	0		0
High	Master Protein	Q2HU72	Steroid nuclear receptor, ligand-binding OS=Medicago truncatula GN=MTR_7g031900 PE=4 SV=2	0	119.396	29	20	119	20	582	64.3	7.66	393.02	20	Not Found	High	High	High	High	High	High	High	Not Found	High	High	High	High	High	High	High	Not Found	High	High	High	High	High	High	High	1	4	Phospho [S345; S556; S559; S568]	0		Phospho [S345; S556; S559; S568]
High	Master Protein	G7LDH0	Dynamin 1E-like protein OS=Medicago truncatula GN=MTR_8g009510 PE=3 SV=1	0	146.01	45	28	79	20	637	71.4	6.57	289.87	28	Not Found	High	High	High	High	High	High	High	Not Found	Not Found	High	High	High	High	High	High	Not Found	High	High	High	High	High	Not Found	High	1	0		0
High	Master Protein	G7IAZ2	2-isopropylmalate synthase OS=Medicago truncatula GN=MTR_1g116500 PE=3 SV=1	0	166.67	47	20	63	20	598	65	6.4	305.02	20	Not Found	Not Found	High	High	High	High	High	Not Found	Not Found	Not Found	High	High	High	High	High	High	Not Found	Not Found	High	High	High	High	High	High	1	0		0
High	Master Protein	G7JGP9	Cytosol aminopeptidase family protein OS=Medicago truncatula GN=MTR_4g130860 PE=3 SV=1	0	198.074	44	21	95	20	567	59.6	7.71	426.87	21	Not Found	High	High	High	High	High	High	High	High	High	High	High	High	High	High	High	Not Found	Not Found	High	High	High	High	High	High	1	0		0
High	Master Protein	A0A072UPP0	Elongation factor G, mitochondrial OS=Medicago truncatula GN=MTR_4g101750 PE=3 SV=1	0	144.249	32	20	56	20	742	81.9	5.71	252.93	20	Not Found	Not Found	High	High	High	High	High	High	Not Found	Not Found	High	High	High	High	Not Found	High	Not Found	Not Found	High	High	High	High	High	High	1	0		0		Deamidated [Q197]
High	Master Protein	G7JAT1	Long-chain-fatty-acid CoA ligase (AMP-forming) OS=Medicago truncatula GN=MTR_3g084450 PE=4 SV=1	0	198.517	36	21	110	20	720	80.2	8.72	504.18	21	Not Found	High	High	High	High	High	High	High	Not Found	Not Found	High	High	High	High	High	High	Not Found	Not Found	High	Not Found	High	High	High	High	1	0		0
High	Master Protein	G7IIU5	Uncharacterized protein OS=Medicago truncatula GN=MTR_2g049330 PE=4 SV=2	0	225.929	75	20	121	20	290	31.2	4.79	544.23	20	High	High	High	High	High	High	High	High	High	High	High	High	High	High	High	High	High	High	High	High	High	High	High	High	1	3	Phospho [S69; S121; S218]	0		Phospho [S69; S121; S218]
High	Master Protein	G7KAG7	Thylakoid lumenal 29 kDa protein OS=Medicago truncatula GN=MTR_5g064610 PE=3 SV=1	0	158.353	50	21	136	20	353	38.9	8.09	514.81	21	High	High	High	High	High	High	High	High	High	High	High	High	High	High	High	High	Not Found	Not Found	High	High	High	High	High	High	1	0		0		Deamidated [Q192]
High	Master Protein	I3S8V0	Stem-loop-binding protein of 41 kDa protein B OS=Medicago truncatula GN=MTR_7g111860 PE=2 SV=1	0	165.79	52	20	109	20	378	42	7.96	402.39	20	Not Found	High	High	High	High	High	High	High	Not Found	High	High	High	High	High	High	High	Not Found	Not Found	High	High	High	High	High	High	1	0		0		Deamidated [Q269]
High	Master Protein	B7FKN6	Tyrosine phosphatase, putative OS=Medicago truncatula GN=MTR_8g088420 PE=2 SV=1	0	153.45	52	20	88	20	335	37.5	6.65	322.99	20	Not Found	High	High	High	High	High	High	High	Not Found	High	High	High	High	High	High	High	Not Found	High	High	High	High	High	High	High	1	0		0
High	Master Protein	G7I717	Tyrosine kinase family protein OS=Medicago truncatula GN=MTR_1g012610 PE=4 SV=2	0	128.812	38	20	59	20	640	71.1	7.97	239.2	20	Not Found	High	High	High	High	High	High	High	Not Found	High	High	High	High	High	High	High	Not Found	High	High	High	High	High	High	High	1	0		0
High	Master Protein	G7I9H2	Calreticulin OS=Medicago truncatula GN=MTR_1g083960 PE=2 SV=1	0	165.116	45	20	132	20	423	48.4	4.56	557.58	20	High	High	High	High	High	High	High	High	High	Not Found	High	High	High	High	High	High	High	Not Found	High	High	High	High	High	High	1	0		0
High	Master Protein	A0A072VGG1	Aldehyde dehydrogenase OS=Medicago truncatula GN=MTR_1g029840 PE=3 SV=1	0	187.61	52	21	87	20	488	53.4	8.88	350.36	21	High	Not Found	High	High	High	High	High	High	High	High	High	High	High	High	High	High	High	High	High	High	High	High	High	High	1	0		0
High	Master Protein	A0A072TMC9	Starch synthase, chloroplastic/amyloplastic OS=Medicago truncatula GN=MTR_8g024340 PE=3 SV=1	0	214.455	43	24	108	20	616	67.8	8.38	506.36	24	High	High	High	High	High	High	High	High	High	Not Found	High	High	High	High	High	High	High	High	High	High	High	High	High	High	1	0		0		Deamidated [R125]
High	Master Protein	G7LE58	Translocon at the outer membrane ofs-like protein OS=Medicago truncatula GN=MTR_8g107280 PE=4 SV=1	0	93.379	31	20	78	20	594	64.6	8.84	233.54	20	High	High	High	High	High	High	High	High	Not Found	High	High	High	High	High	High	High	High	High	High	High	High	High	High	High	1	0		0
High	Master Protein	G7JVL9	NAD(P)H-quinone oxidoreductase subunit H OS=Medicago truncatula GN=MTR_4g006100 PE=3 SV=1	0	115.6	18	20	104	20	899	103.3	5.59	380.75	20	High	High	High	High	High	High	High	High	High	Not Found	High	High	High	High	High	High	High	Not Found	Not Found	High	High	High	High	High	1	0		0		Deamidated [R297]
High	Master Protein	G7L8W8	Signal peptidase I family protein OS=Medicago truncatula GN=MTR_8g103470 PE=2 SV=1	0	205.314	60	20	156	20	292	32.5	9.17	727.14	20	High	High	High	High	High	High	High	High	High	High	High	High	High	High	High	High	High	High	High	High	High	High	High	High	1	0		0		Deamidated [R195; R206]
High	Master Protein	A2Q2V1	ATP-citrate lyase/succinyl-CoA ligase OS=Medicago truncatula GN=MTR_2g034090 PE=4 SV=1	0	167.907	42	20	110	20	608	65.9	7.72	492.3	20	Not Found	High	High	High	High	High	High	High	Not Found	High	High	High	High	High	High	High	Not Found	Not Found	High	High	High	High	High	High	1	0		0
High	Master Protein	A0A072U9U8	ABC transporter family protein OS=Medicago truncatula GN=MTR_6g465300 PE=4 SV=1	0	181.242	30	21	95	20	715	78.3	8.94	374.59	21	Not Found	High	High	Medium	High	High	High	High	High	High	High	High	High	High	High	High	Not Found	High	High	Medium	High	High	High	High	1	0		0
High	Master Protein	Q4ZGM9	13-hydroperoxide lyase OS=Medicago truncatula GN=HPL3 PE=2 SV=1	0	222.513	43	20	175	20	480	53.7	8.15	726.32	20	Not Found	High	High	High	High	High	High	High	High	Not Found	High	High	High	High	High	High	High	High	High	High	High	High	High	High	1	0		0		Deamidated [Q319]
High	Master Protein	G7L9X9	26S proteasome regulatory complex protein OS=Medicago truncatula GN=MTR_8g023550 PE=3 SV=1	0	88.87	43	20	85	20	411	46.2	5.97	231.67	20	Not Found	High	High	High	High	High	High	High	High	High	High	High	High	High	High	High	High	High	High	High	High	High	High	High	1	0		0
High	Master Protein	Q2HUA3	Phospholipase D OS=Medicago truncatula GN=MTR_2g103730 PE=3 SV=1	0	127.319	29	20	52	20	809	92	5.8	218.84	20	Not Found	Not Found	High	High	High	High	High	Not Found	Not Found	Not Found	High	High	High	High	High	High	Not Found	Not Found	High	High	High	High	High	High	1	0		0
High	Master Protein	G7JSU8	Callose synthase-like protein OS=Medicago truncatula GN=MTR_4g078220 PE=4 SV=1	0	139.092	15	25	96	20	1815	211.6	8.98	389.6	25	High	High	Not Found	High	High	High	High	High	Not Found	High	High	High	High	High	High	High	Not Found	Not Found	High	High	High	High	High	High	1	1	Phospho [S1040]	0		Phospho [S1040]
High	Master Protein	G7L7F0	Phosphotransferase OS=Medicago truncatula GN=MTR_8g102460 PE=3 SV=2	0	240.924	53	22	171	19	498	53.7	5.57	806.75	22	High	High	High	High	High	High	High	High	Not Found	Not Found	High	High	High	High	High	High	Not Found	Not Found	Not Found	High	High	High	High	High	1	0		0
High	Master Protein	A0A072TVN2	Dynamin-like protein 1E OS=Medicago truncatula GN=MTR_8g099550 PE=3 SV=1	0	183.757	42	29	106	19	610	68.2	8.03	399.43	29	High	High	High	High	High	High	High	High	High	High	High	High	High	High	High	High	Not Found	High	Not Found	High	High	High	High	High	1	0		0
High	Master Protein	A0A072TRU7	Kinesin-like protein for actin based movement protein OS=Medicago truncatula GN=MTR_8g471180 PE=3 SV=1	0	126.422	19	19	42	19	1297	143.3	6.38	169.57	19	Not Found	High	High	High	High	Not Found	High	High	Not Found	Not Found	High	High	High	High	Not Found	High	High	High	High	High	High	High	High	High	1	0		0
High	Master Protein	A0A072VPJ1	Protein disulfide isomerase-like protein, putative OS=Medicago truncatula GN=MTR_1g096790 PE=4 SV=1	0	150.267	34	19	112	19	430	48.5	5.11	473.55	19	High	High	High	High	High	High	High	High	High	High	High	High	High	High	High	High	High	High	High	High	High	High	High	High	1	0		0
High	Master Protein	G7KIR6	Trypsin-like serine protease OS=Medicago truncatula GN=MTR_6g007030 PE=2 SV=1	0	166.86	49	19	79	19	432	45.8	7.3	347.93	19	Not Found	High	High	High	High	High	High	High	Not Found	High	High	High	High	High	High	High	Not Found	High	High	High	High	High	High	High	1	0		0		Deamidated [Q119]
High	Master Protein	G7I3R9	NADH-ubiquinone oxidoreductase 51 kDa subunit OS=Medicago truncatula GN=MTR_1g042300 PE=4 SV=2	0	87.212	38	19	68	19	483	52.9	8.27	193.08	19	Not Found	High	High	High	High	High	High	High	Not Found	High	High	High	High	High	High	High	Not Found	Not Found	High	High	High	High	High	High	1	0		0		Carboxymethyl [K246]; Deamidated [R60]
High	Master Protein	I3SN70	Photosystem I reaction center subunit III OS=Medicago truncatula GN=MTR_2g029370 PE=2 SV=1	0	136.214	38	19	366	19	224	24.7	9.69	1075.7	19	High	High	High	High	High	High	High	High	High	High	High	High	High	High	High	High	High	High	High	High	High	High	High	High	1	0		0		Deamidated [R212]
High	Master Protein	A0A072V5C1	Glyoxysomal fatty acid beta-oxidation MFP-A protein OS=Medicago truncatula GN=MTR_2g436300 PE=4 SV=1	0	158.821	33	22	53	19	721	78.5	9.01	220.66	22	Not Found	High	High	High	High	High	High	High	Medium	Not Found	High	High	High	High	High	High	High	High	High	High	High	High	High	High	1	0		0
High	Master Protein	G7LDE8	Pigment defective 320 protein, putative OS=Medicago truncatula GN=MTR_8g009290 PE=4 SV=1	0	139.72	44	19	112	19	465	52.2	8.59	397.23	19	Not Found	High	High	High	High	High	High	High	Not Found	High	High	High	High	High	High	High	Not Found	High	High	High	High	High	High	High	1	0		0
High	Master Protein	G7J3T3	Peroxisomal ABC transporter OS=Medicago truncatula GN=MTR_3g087350 PE=4 SV=2	0	90.775	16	19	46	19	1337	150.3	8.98	139.8	19	Not Found	High	High	High	High	High	High	High	High	High	High	High	High	High	High	High	High	High	High	High	High	High	High	High	1	0		0
High	Master Protein	B7FIZ5	Chlorophyll a-b binding protein, chloroplastic OS=Medicago truncatula GN=MTR_4g015570 PE=2 SV=1	0	246.47	54	20	547	19	289	31.5	6.57	2037.22	20	High	High	High	High	High	High	High	High	High	High	High	High	High	High	High	High	High	High	High	High	High	High	High	High	1	4	Phospho [S48; T111; T113; T121]	0		Deamidated [R112; Q124; Q133; Q238]; Phospho [S48; T111; T113; T121]
High	Master Protein	G7JSR5	p-loop nucleoside triphosphate hydrolase superfamily protein OS=Medicago truncatula GN=MTR_4g077880 PE=4 SV=1	0	156.418	37	23	92	19	613	67.9	9.1	321.33	23	High	High	High	High	High	High	High	High	Not Found	High	High	High	High	High	High	High	Not Found	High	High	High	High	High	High	High	1	0		0		Deamidated [R336; R351; Q418]
High	Master Protein	G7II21	Protein disulfide isomerase-like protein OS=Medicago truncatula GN=MTR_2g101880 PE=4 SV=1	0	118.138	43	19	51	19	520	58.7	5.35	169.3	19	High	High	Not Found	High	High	High	High	High	High	High	High	High	High	High	High	High	High	High	High	High	High	High	High	High	1	0		0
High	Master Protein	G7IYL0	LRR receptor-like kinase OS=Medicago truncatula GN=MTR_3g009050 PE=4 SV=1	0	107.928	38	19	50	19	479	52.9	8.62	173.64	19	Not Found	High	High	High	High	Not Found	High	High	Not Found	Medium	High	High	High	High	High	High	Not Found	Not Found	High	High	High	Not Found	High	High	1	0		0
High	Master Protein	A0A072VC55	Syntaxin of plants 122 protein OS=Medicago truncatula GN=MTR_2g088700 PE=4 SV=1	0	165.197	50	19	139	19	307	34.6	6.57	530.91	19	High	High	High	High	High	High	High	High	High	High	High	High	High	High	High	High	High	High	High	High	High	High	High	High	1	0		0		Carboxymethyl [K140]; Deamidated [R115; R142]
High	Master Protein	G7I7H7	Thylakoid lumen 18.3 kDa protein OS=Medicago truncatula GN=MTR_1g082420 PE=4 SV=1	0	324.894	47	19	423	19	289	31.4	7.33	1756.01	19	High	High	High	High	High	High	High	High	High	High	High	High	High	High	High	High	High	High	High	High	High	High	High	High	1	0		0		Deamidated [R140; Q154; Q178; Q191]
High	Master Protein	A0A072U0Q0	Fasciclin-like arabinogalactan protein OS=Medicago truncatula GN=MTR_7g075453 PE=4 SV=1	0	264.074	38	19	313	19	418	42.9	6.3	1493.31	19	High	High	High	High	High	High	High	High	High	High	High	High	High	High	High	High	High	High	High	High	High	High	High	High	1	3	Phospho [T213; T219; S246]	0		Deamidated [Q211; Q249]; Phospho [T213; T219; S246]
High	Master Protein	S4T086	ATP synthase CF0 B subunit OS=Medicago truncatula GN=atpF PE=3 SV=1	0	227.075	53	19	268	19	184	21.1	6.58	1125.73	19	High	High	High	High	High	High	High	High	High	High	High	High	High	High	High	High	High	High	High	High	High	High	High	High	1	0		0		Deamidated [R65; R71; Q77; R96; R105; Q134]
High	Master Protein	G7I3Z0	N-carbamyl-L-amino acid amidohydrolase OS=Medicago truncatula GN=MTR_1g075320 PE=4 SV=2	0	118.305	49	19	60	19	469	50.8	5.82	222.95	19	Medium	High	High	High	High	High	High	High	Not Found	High	High	High	High	High	High	High	Not Found	High	Not Found	High	High	High	High	High	1	0		0		Deamidated [R107]
High	Master Protein	G7J6P5	LysM receptor kinase K1B OS=Medicago truncatula GN=MTR_3g080050 PE=4 SV=2	0	205.271	34	20	162	19	621	68	5.81	718.8	20	Not Found	High	High	High	High	High	High	High	Not Found	High	High	High	High	High	High	High	Not Found	Not Found	High	High	High	High	High	High	1	0		0
High	Master Protein	G7I7R4	Calcium-dependent lipid-binding (CaLB domain) family protein OS=Medicago truncatula GN=MTR_1g025550 PE=4 SV=1	0	160.459	38	20	130	19	535	61	7.83	539.62	20	High	High	High	High	High	High	High	High	Not Found	High	High	High	High	High	High	High	High	High	High	High	High	High	High	High	1	0		0		Deamidated [R511]
High	Master Protein	G7J4L3	NADPH--cytochrome P450 reductase OS=Medicago truncatula GN=MTR_3g100160 PE=2 SV=1	0	191.437	32	23	146	19	692	76.8	5.24	607.38	23	High	High	High	High	High	High	High	High	High	High	High	High	High	High	High	High	High	High	High	High	High	High	High	High	1	0		0		Deamidated [R157]
High	Master Protein	A0A072UBG4	Phosphoinositide phosphatase SAC1 OS=Medicago truncatula GN=MTR_7g068890 PE=4 SV=1	0	144.899	38	19	54	19	591	67.6	6.8	241	19	High	Medium	High	High	High	High	High	High	Not Found	Not Found	High	High	High	High	High	High	Not Found	High	High	High	High	High	High	High	1	0		0
High	Master Protein	A0A072UJS6	Shoot gravitropism 2 (SGR2) protein OS=Medicago truncatula GN=MTR_4g033490 PE=4 SV=1	0	144.567	22	19	37	19	929	105.6	5.81	168.07	19	Not Found	High	High	High	High	Not Found	Not Found	High	Not Found	High	High	Not Found	High	High	Not Found	High	Not Found	Not Found	High	High	High	High	High	High	1	0		0
High	Master Protein	G7I373	Dolichyl-diphosphooligosaccharide--protein glycosyltransferase subunit 1 OS=Medicago truncatula GN=MTR_1g094870 PE=3 SV=2	0	103.433	41	20	115	19	469	53.1	7.52	418.4	20	Not Found	High	High	High	High	High	High	High	Not Found	High	High	High	High	High	High	High	Not Found	High	High	High	High	High	High	High	1	0		0
High	Master Protein	G7K3D2	Tropomyosin-like protein, putative OS=Medicago truncatula GN=MTR_5g091710 PE=4 SV=1	0	143.026	42	19	80	19	345	39.3	4.88	353.41	19	High	High	High	High	High	Not Found	Not Found	Not Found	Not Found	High	High	High	Not Found	High	High	High	High	High	High	High	High	High	High	High	1	0		0		Deamidated [R301]
High	Master Protein	G7J9D5	RNA recognition motif OS=Medicago truncatula GN=MTR_3g065490 PE=4 SV=1	0	98.926	56	19	66	19	291	31.1	11.37	214.78	19	High	Not Found	High	High	High	High	High	High	Not Found	Not Found	High	High	High	High	High	High	Not Found	Not Found	High	High	High	High	High	High	1	0		0
High	Master Protein	A0A072UU27	F0F1 ATP synthase subunit gamma OS=Medicago truncatula GN=MTR_4g129790 PE=3 SV=1	0	122.948	52	19	167	19	327	35.5	9.2	544.34	19	High	High	High	High	High	High	High	High	High	High	High	High	High	High	High	High	High	High	High	High	High	High	High	High	1	0		0
High	Master Protein	G7IDM5	Sucrose-binding protein-like protein OS=Medicago truncatula GN=MTR_1g071710 PE=4 SV=1	0	145.88	39	19	80	19	494	56	6.4	307.72	19	Not Found	High	High	High	High	High	High	High	Not Found	High	High	Not Found	High	High	High	High	Not Found	Medium	High	High	High	High	High	High	1	0		0
High	Master Protein	A0A072VNV3	Embryo defective 2410 protein OS=Medicago truncatula GN=MTR_1g010300 PE=4 SV=1	0	124.957	11	18	39	18	2205	242.8	6.44	148.58	18	Not Found	High	High	High	High	High	High	Not Found	Not Found	High	Not Found	High	High	High	High	Not Found	High	High	Not Found	High	High	High	Not Found	Not Found	1	0		0
High	Master Protein	A0A072U288	Transducin/WD-like repeat-protein OS=Medicago truncatula GN=MTR_7g074890 PE=4 SV=1	0	97.271	37	18	60	18	432	46.8	8.82	209.4	18	Not Found	High	High	High	High	High	High	High	Not Found	Not Found	Not Found	High	High	High	High	High	Not Found	Not Found	Not Found	High	High	High	High	High	1	0		0
High	Master Protein	A0A072V606	LRR receptor-like kinase family protein OS=Medicago truncatula GN=MTR_2g030380 PE=4 SV=1	0	101.326	18	19	85	18	1066	115.7	6.43	262.7	19	Not Found	High	High	Not Found	High	High	High	High	Not Found	Not Found	High	High	High	High	High	High	Not Found	Not Found	Not Found	High	High	High	High	High	1	0		0
High	Master Protein	A0A072VK75	Uncharacterized protein OS=Medicago truncatula GN=MTR_1g069005 PE=4 SV=1	0	103.136	15	18	36	18	1831	194.2	6.29	140.57	18	Not Found	High	Not Found	High	High	High	High	High	Not Found	High	High	High	High	High	High	High	Not Found	Not Found	High	High	High	Not Found	High	High	1	0		0
High	Master Protein	G7KH66	Protein disulfide isomerase-like protein OS=Medicago truncatula GN=MTR_5g084930 PE=3 SV=1	0	159.315	39	18	106	18	435	47.4	5.57	480.71	18	Not Found	High	High	High	High	High	High	High	Not Found	Not Found	High	High	High	High	High	High	Not Found	Not Found	High	High	High	High	High	High	1	0		0		Deamidated [Q314]
High	Master Protein	A0A072UUK4	Protein transporter Sec31 OS=Medicago truncatula GN=MTR_4g045577 PE=4 SV=1	0	149.05	23	18	67	18	1124	121.6	5.35	292.01	18	Not Found	High	High	High	High	High	High	High	Not Found	High	High	High	High	High	High	High	Not Found	High	High	High	High	High	High	High	1	0		0		Deamidated [Q414]
High	Master Protein	A0A072VM89	Nucleoporin autopeptidase OS=Medicago truncatula GN=MTR_1g078040 PE=4 SV=1	0	141.553	18	18	54	18	1004	103.8	8.54	220.86	18	Not Found	Not Found	High	High	High	High	High	Not Found	Not Found	Not Found	High	High	High	High	High	High	Not Found	Not Found	High	High	High	High	High	High	1	0		0		Deamidated [Q790; Q793]
High	Master Protein	A0A072W2L8	Photosystem II reaction center PsbP family protein OS=Medicago truncatula GN=MTR_1g115410 PE=4 SV=1	0	137.034	56	18	114	18	234	27.1	8.51	414.55	18	Not Found	High	High	High	High	High	High	High	Not Found	Not Found	High	High	High	High	High	High	Not Found	Not Found	High	High	High	High	High	High	1	0		0		Carboxymethyl [K134]; Deamidated [R137; R202]
High	Master Protein	G7J2H2	Glyceraldehyde-3-phosphate dehydrogenase OS=Medicago truncatula GN=MTR_3g085850 PE=3 SV=1	0	212.999	69	28	201	18	340	37	7.47	677.66	28	High	High	High	High	High	High	High	High	High	High	High	High	High	High	High	High	High	Not Found	Not Found	High	High	High	High	High	1	0		0		Carboxymethyl [K191]; Deamidated [Q190; R296]
High	Master Protein	G7J632	Lipoxygenase OS=Medicago truncatula GN=MTR_3g079450 PE=3 SV=2	0	152.982	27	24	52	18	902	103.2	6.51	206.54	24	Not Found	High	High	High	Not Found	High	High	Not Found	Not Found	Not Found	High	High	Not Found	High	Not Found	High	Not Found	Not Found	High	High	High	High	Not Found	Not Found	1	0		0
High	Master Protein	G7K259	Clathrin heavy chain OS=Medicago truncatula GN=MTR_5g082900 PE=3 SV=1	0	515.7	35	56	301	18	1706	193.2	5.44	1277.34	56	Not Found	High	High	High	High	High	High	High	Not Found	High	High	High	High	High	High	High	Not Found	High	High	High	High	High	High	High	1	0		0
High	Master Protein	G7L779	NAD(P)-binding rossmann-fold protein OS=Medicago truncatula GN=MTR_8g087310 PE=4 SV=2	0	102.779	36	18	43	18	597	65.9	8.47	165.64	18	Not Found	Not Found	High	High	High	High	High	High	Not Found	High	High	High	High	High	Not Found	High	Not Found	High	High	High	High	High	High	High	1	0		0
High	Master Protein	G7JTE4	Aldo/keto reductase family oxidoreductase OS=Medicago truncatula GN=MTR_4g021350 PE=2 SV=1	0	76.19	56	18	38	18	313	34.7	6.55	137.93	18	Not Found	Not Found	High	High	High	High	High	High	Not Found	High	High	High	High	High	High	High	High	High	Not Found	High	High	Not Found	High	High	1	0		0
High	Master Protein	G7IED4	Mitochondrial Rho GTPase OS=Medicago truncatula GN=MTR_1g072280 PE=3 SV=1	0	94.778	30	18	40	18	640	71.4	7.25	155.84	18	Not Found	Not Found	High	High	Medium	High	Not Found	High	Not Found	High	High	High	High	High	High	High	Not Found	Not Found	High	High	High	High	Medium	High	1	0		0		Deamidated [R193]
High	Master Protein	A0A072UGG8	Heat shock 70 kDa protein OS=Medicago truncatula GN=MTR_4g012050 PE=3 SV=1	0	180.573	30	23	73	18	851	93.7	5.25	297.68	23	Not Found	High	High	High	High	High	High	High	Not Found	High	High	High	High	High	High	High	Not Found	High	High	High	High	High	High	High	1	0		0
High	Master Protein	A0A072V2G4	Dihydrolipoamide acetyltransferase component of pyruvate dehydrogenase complex OS=Medicago truncatula GN=MTR_4g120220 PE=3 SV=1	0	128.205	33	18	93	18	520	57.1	6.65	373.14	18	Not Found	High	High	High	High	High	High	High	Not Found	High	High	High	High	High	High	High	Not Found	Not Found	High	High	High	High	High	High	1	0		0
High	Master Protein	G7JCM9	Phospholipase A1 OS=Medicago truncatula GN=MTR_4g080100 PE=4 SV=1	0	178.468	42	18	135	18	442	49.9	5.88	479.59	18	Not Found	High	High	High	High	High	High	High	Not Found	Not Found	High	High	High	High	High	High	Not Found	Not Found	Not Found	High	High	High	High	High	1	0		0
High	Master Protein	A0A072VJS3	Uncharacterized protein OS=Medicago truncatula GN=MTR_1g053910 PE=4 SV=1	0	109.973	49	18	44	18	342	36.6	9.73	160.65	18	Not Found	High	High	High	High	High	High	High	Not Found	High	High	High	Not Found	High	High	High	Not Found	High	High	High	High	High	Medium	High	1	0		0
High	Master Protein	G7IN73	Eukaryotic translation initiation factor 3 subunit C OS=Medicago truncatula GN=MTR_2g005610 PE=3 SV=1	0	89.032	18	18	38	18	984	110.9	5.97	138.37	18	High	High	High	High	Not Found	High	High	High	Not Found	Not Found	High	High	High	High	High	High	Not Found	High	High	Not Found	High	High	Medium	High	1	0		0
High	Master Protein	G7ZW80	30S ribosomal protein S4 OS=Medicago truncatula GN=rps4 PE=3 SV=1	0	148.119	52	18	110	18	201	23.2	10.39	434.91	18	Not Found	High	High	High	High	High	High	High	Not Found	High	High	High	High	High	High	High	Not Found	High	High	High	High	High	High	High	1	1	Phospho [S151]	0		Deamidated [Q149]; Phospho [S151]
High	Master Protein	G7LCR3	Calcium-dependent lipid-binding (CaLB domain) family protein OS=Medicago truncatula GN=MTR_8g035590 PE=4 SV=1	0	236.416	34	23	160	18	513	55.4	8.78	676.25	23	High	High	High	High	High	High	High	High	High	High	High	High	High	High	High	High	High	High	High	High	High	High	High	High	1	1	Phospho [S508]	0		Phospho [S508]; Deamidated [Q504]
High	Master Protein	G7K975	Rieske (2Fe-2S) domain protein OS=Medicago truncatula GN=MTR_5g008750 PE=4 SV=1	0	193.735	52	18	185	18	272	30	8.13	694.58	18	High	High	High	High	High	High	High	High	High	High	High	High	High	High	High	High	High	High	High	High	High	High	High	High	1	1	Phospho [T202]	0		Deamidated [Q55; Q198]; Phospho [T202]
High	Master Protein	G7J5Z3	Outer envelope pore protein OS=Medicago truncatula GN=MTR_3g115990 PE=2 SV=1	0	184.468	67	18	118	18	178	20.8	9.51	546.41	18	Not Found	High	High	High	High	High	High	High	Not Found	Not Found	Not Found	High	High	High	High	High	High	High	Not Found	High	High	High	High	High	1	0		0		Deamidated [Q42; Q66]
High	Master Protein	G7J2K6	Enoyl-(Acyl carrier) reductase OS=Medicago truncatula GN=MTR_3g086210 PE=3 SV=1	0	136.498	44	18	137	18	320	35.9	9.52	511.91	18	Not Found	High	High	High	High	High	High	High	Not Found	High	High	High	High	High	High	High	Not Found	Not Found	High	High	High	High	High	High	1	0		0
High	Master Protein	A0A072V3P1	Outer envelope pore protein OS=Medicago truncatula GN=MTR_4g134950 PE=4 SV=1	0	178.792	56	18	121	18	336	37.8	7.9	562.29	18	High	High	High	High	High	High	High	High	High	High	High	High	High	High	High	High	High	High	High	High	High	High	High	High	1	0		0		Deamidated [R40]
High	Master Protein	G7LGJ8	Calnexin 2 OS=Medicago truncatula GN=MTR_8g095680 PE=3 SV=1	0	239.464	42	21	136	18	540	61.8	4.97	659.33	21	High	High	High	High	High	High	High	High	High	High	High	High	High	High	High	High	High	High	High	High	High	High	High	High	1	0		0		Deamidated [Q515]
High	Master Protein	A0A072VP26	Aspartate aminotransferase OS=Medicago truncatula GN=MTR_1g013050 PE=4 SV=1	0	114.285	43	19	56	18	465	50.9	8.16	202.35	19	Not Found	Not Found	High	High	High	High	High	High	Not Found	Not Found	Not Found	High	High	High	High	High	Not Found	Not Found	Not Found	High	High	High	High	High	1	0		0
High	Master Protein	G7LBQ7	Glycerol-3-phosphate acyltransferase OS=Medicago truncatula GN=MTR_8g030620 PE=4 SV=1	0	94.035	31	18	61	18	505	56	9.31	197.96	18	High	High	High	High	High	High	High	High	High	High	High	Not Found	High	High	High	High	High	Not Found	High	High	High	High	High	High	1	0		0
High	Master Protein	G7KK36	ERD (Early-responsive to dehydration stress) family protein OS=Medicago truncatula GN=MTR_4g132570 PE=4 SV=1	0	125.181	19	18	76	18	774	88.2	9.19	312.72	18	Not Found	High	High	High	High	High	High	High	Not Found	High	High	High	High	High	High	High	Not Found	High	High	High	High	High	High	High	1	0		0
High	Master Protein	I3SG23	SPFH/band 7/PHB domain membrane-associated family protein OS=Medicago truncatula GN=MTR_6g460470 PE=2 SV=1	0	136.456	45	18	134	18	292	32.4	5.01	511.91	18	High	High	High	High	High	High	High	High	Not Found	High	High	High	High	High	High	High	High	High	High	High	High	High	High	High	1	0		0
High	Master Protein	A0A072V2V0	ATP-dependent Clp protease ATP-binding subunit OS=Medicago truncatula GN=MTR_3g498725 PE=3 SV=1	0	474.292	48	54	342	18	922	102.7	6.77	1349.46	54	Not Found	High	High	High	High	High	High	High	Not Found	High	High	High	High	High	High	High	High	High	High	High	High	High	High	High	1	0		0
High	Master Protein	G7J8C0	Puromycin-sensitive aminopeptidase-like protein OS=Medicago truncatula GN=MTR_3g104720 PE=4 SV=1	0	103.399	23	18	50	18	876	98.9	5.69	165.07	18	Not Found	High	High	High	High	High	High	High	Not Found	High	High	High	High	High	Not Found	Not Found	Not Found	High	High	High	High	High	High	High	1	0		0
High	Master Protein	G7JPH8	Photosystem II stability/assembly factor HCF136 OS=Medicago truncatula GN=MTR_4g075040 PE=4 SV=1	0	166.072	49	18	125	18	396	43.7	8.03	518.9	18	Not Found	High	High	High	High	High	High	High	Not Found	High	High	High	High	High	High	High	Not Found	High	High	High	High	High	High	High	1	0		0
High	Master Protein	G7IBS1	Receptor-like kinase OS=Medicago truncatula GN=MTR_1g086230 PE=3 SV=1	0	266.066	48	21	194	18	476	52	8	863.39	21	High	High	High	High	High	High	High	High	High	High	High	High	High	High	High	High	High	High	High	High	High	High	High	High	1	0		0		Deamidated [R271]
High	Master Protein	B7FJ16	Oxygen-evolving enhancer protein 2-1 OS=Medicago truncatula GN=MTR_3g449930 PE=2 SV=1	0	177.544	44	18	260	18	261	28.1	7.84	1147.52	18	High	High	High	High	High	High	High	High	High	High	High	High	High	High	High	High	High	High	High	High	High	High	High	High	1	0		0
High	Master Protein	A0A072TQN9	Plastocyanin-like domain protein OS=Medicago truncatula GN=MTR_8g463180 PE=4 SV=1	0	156.593	31	18	191	18	303	30.1	8.68	778.39	18	High	High	High	High	High	High	High	High	Not Found	High	High	High	High	High	High	High	High	High	High	High	High	High	High	High	1	0		0		Carboxymethyl [K116]
High	Master Protein	Q5ENY3	Calcium-binding EF-hand; Ferric reductase-like transmembrane component (Fragment) OS=Medicago truncatula GN=MTR_7g113130 PE=2 SV=1	0	138.589	24	23	62	17	895	101.7	9.35	234.47	23	Not Found	High	High	High	High	High	High	High	Not Found	High	High	High	High	High	High	High	Not Found	High	High	High	High	High	High	Not Found	1	0		0
High	Master Protein	G7I8P7	26S proteasome regulatory particle triple-A ATPase protein OS=Medicago truncatula GN=MTR_1g083330 PE=3 SV=1	0	159.687	46	18	65	17	423	47.4	5.11	261.4	18	Not Found	High	High	High	High	High	High	Not Found	Not Found	High	High	High	High	High	High	Not Found	Not Found	High	High	High	High	High	High	High	1	0		0		Carboxymethyl [K262]; Deamidated [Q379]
High	Master Protein	G7KZ97	Ethanolamine-phosphate cytidylyltransferase OS=Medicago truncatula GN=MTR_7g074620 PE=4 SV=2	0	168.103	44	19	109	17	422	47	8.09	497.77	19	Not Found	High	High	High	High	High	High	High	Not Found	Not Found	High	High	High	High	High	High	Not Found	High	High	High	High	High	High	High	1	0		0		Deamidated [Q244; R249]
High	Master Protein	G7IIR7	DnaJ heat shock family protein OS=Medicago truncatula GN=MTR_2g044580 PE=4 SV=1	0	108.081	21	17	73	17	685	76.5	5.44	309.65	17	High	High	High	High	High	High	High	High	Medium	High	High	High	High	High	High	High	High	High	High	High	High	High	High	High	1	0		0
High	Master Protein	G7IEJ2	Fumarate hydratase OS=Medicago truncatula GN=MTR_1g087900 PE=3 SV=1	0	104.46	36	17	71	17	491	53.3	8.53	258.14	17	Not Found	Not Found	High	High	High	High	High	High	Not Found	Not Found	High	High	High	High	High	High	Not Found	Not Found	High	High	High	High	High	High	1	0		0		Deamidated [Q58]
High	Master Protein	G7JEF1	Vacuolar ATP synthase subunit D, putative OS=Medicago truncatula GN=MTR_4g007030 PE=4 SV=1	0	137.62	55	17	148	17	259	29	9.58	613.97	17	Not Found	High	High	High	High	High	High	High	Not Found	Not Found	High	High	High	High	High	High	High	High	High	High	High	High	High	High	1	0		0
High	Master Protein	G7KQV2	SOUL heme-binding family protein OS=Medicago truncatula GN=MTR_7g104650 PE=4 SV=1	0	116.823	49	17	70	17	296	33.4	9.36	253.05	17	Medium	High	High	High	High	High	High	High	Not Found	High	High	High	High	High	High	High	Not Found	High	High	High	High	High	High	High	1	0		0
High	Master Protein	G7IWH9	Clustered mitochondria protein homolog OS=Medicago truncatula GN=MTR_3g027610 PE=3 SV=2	0	111.824	15	17	48	17	1448	157.4	6.23	188.42	17	Not Found	High	High	High	High	High	High	High	Not Found	High	High	High	High	High	High	High	Not Found	High	High	Not Found	Not Found	High	High	Not Found	1	0		0
High	Master Protein	G7KCE7	Plastid fibrillin OS=Medicago truncatula GN=MTR_5g029590 PE=4 SV=1	0	189.113	50	17	137	17	355	37.7	4.7	537.02	17	High	High	High	High	High	High	High	High	Not Found	High	High	High	High	High	High	High	Not Found	High	High	High	High	High	High	High	1	0		0		Deamidated [R135]
High	Master Protein	A0A072VDK2	Outer envelope pore protein 24B OS=Medicago truncatula GN=MTR_1g022050 PE=4 SV=1	0	123.607	55	17	148	17	213	23.6	9.38	580.56	17	High	High	High	High	High	High	High	High	High	High	High	High	High	High	High	High	High	High	High	High	High	High	High	High	1	0		0
High	Master Protein	A2Q4Q6	Allantoinase OS=Medicago truncatula GN=MTR_2g013060 PE=4 SV=1	0	142.848	35	17	64	17	504	55.3	5.53	374.05	17	Not Found	High	High	High	High	High	High	High	Not Found	Not Found	High	Not Found	High	High	High	High	Not Found	Not Found	High	Not Found	High	High	High	High	1	0		0
High	Master Protein	A0A072U1R9	Calmodulin-domain kinase CDPK protein OS=Medicago truncatula GN=MTR_7g091890 PE=4 SV=1	0	232.582	40	27	190	17	533	60.6	6.6	823.94	27	High	High	High	High	High	High	High	High	High	Not Found	High	High	High	High	High	High	High	High	High	High	High	High	High	High	1	1	Phospho [S526]	0		Phospho [S526]
High	Master Protein	G7L7H0	Malic enzyme OS=Medicago truncatula GN=MTR_8g102620 PE=3 SV=1	0	165.711	40	24	139	17	591	65.3	6.37	532.62	24	Not Found	High	High	High	High	High	High	High	Not Found	Not Found	High	High	High	High	High	High	Not Found	Not Found	High	High	High	High	High	High	1	1	Phospho [S18]	0		Phospho [S18]
High	Master Protein	A0A072TM25	Patatin OS=Medicago truncatula GN=MTR_8g007065 PE=3 SV=1	0	147.5	40	17	122	17	422	45.9	5.03	429.37	17	High	High	High	High	High	High	High	High	High	High	High	High	High	High	High	High	High	High	High	High	High	High	High	High	1	0		0		Deamidated [Q272]
High	Master Protein	A0A072TU77	Peptidase M1 family aminopeptidase N OS=Medicago truncatula GN=MTR_8g098525 PE=4 SV=1	0	111.471	21	17	45	17	975	109.6	6.61	184.72	17	Not Found	Not Found	High	High	High	High	High	High	Not Found	High	High	High	Not Found	High	High	High	Not Found	High	High	High	High	High	High	High	1	0		0
High	Master Protein	G7L7C1	Dynamin 4C-like protein OS=Medicago truncatula GN=MTR_8g087770 PE=3 SV=1	0	135.571	28	17	60	17	674	75.3	6.09	251.3	17	Not Found	High	High	High	High	High	High	High	Not Found	High	High	High	High	High	High	High	High	High	High	High	High	High	High	High	1	0		0
High	Master Protein	G7I4U4	Plastid fibrillin OS=Medicago truncatula GN=MTR_1g075660 PE=4 SV=1	0	256.606	52	17	292	17	276	29.7	7.44	1159.29	17	High	High	High	High	High	High	High	High	High	High	High	High	High	High	High	High	High	High	High	High	High	High	High	High	1	0		0		Deamidated [Q102; R126; Q128; R130; Q166; Q235]
High	Master Protein	G7I885	Aspartate-tRNA ligase OS=Medicago truncatula GN=MTR_1g014140 PE=4 SV=1	0	88.034	35	17	39	17	541	60.5	6.4	139.61	17	Not Found	Not Found	High	High	High	High	High	Not Found	Not Found	Not Found	High	High	High	High	High	High	Not Found	Not Found	High	High	High	High	High	Not Found	1	0		0
High	Master Protein	G7JIM0	Coatomer subunit alpha OS=Medicago truncatula GN=MTR_4g071130 PE=4 SV=1	0	169.266	28	30	76	17	1206	135.4	6.96	258.89	30	Not Found	Not Found	High	Not Found	High	High	High	High	Not Found	Not Found	High	High	High	High	High	High	Not Found	Not Found	High	High	High	High	High	High	1	0		0
High	Master Protein	G7JPU2	Serine/Threonine-kinase HT1-like protein OS=Medicago truncatula GN=MTR_4g106980 PE=4 SV=2	0	208.652	41	23	155	17	392	43.9	7.61	624.18	23	High	High	High	High	High	High	High	High	High	High	High	High	High	High	High	High	High	High	High	High	High	High	High	High	1	2	Phospho [S61; S65]	0		Carboxymethyl [K2]; Phospho [S61; S65]
High	Master Protein	A0A072V4G2	F0F1 ATP synthase subunit gamma OS=Medicago truncatula GN=MTR_2g023290 PE=3 SV=1	0	182.412	21	18	292	17	1021	111.6	4.96	1082.57	18	High	High	High	High	High	High	High	High	High	High	High	High	High	High	High	High	High	High	High	High	High	High	High	High	1	3	Phospho [T886; S891; S968]	0		Deamidated [R740; Q758; Q966]; Phospho [T886; S891; S968]
High	Master Protein	G7L3A6	Iron-sulfur cluster biosynthesis family protein OS=Medicago truncatula GN=MTR_7g030010 PE=4 SV=1	0	98.592	32	17	79	17	507	57.4	8.7	295.92	17	Not Found	High	High	High	High	High	High	High	Not Found	High	High	High	High	High	High	High	Not Found	High	High	High	High	High	High	High	1	0		0
High	Master Protein	A0A072UUL3	Beta-amylase OS=Medicago truncatula GN=MTR_4g045667 PE=3 SV=1	0	169.05	43	18	77	17	496	56.2	5.35	427.68	18	Not Found	High	High	High	High	High	High	High	Not Found	High	High	Not Found	High	High	High	High	Not Found	High	High	High	High	High	High	High	1	0		0		Deamidated [Q394]
High	Master Protein	B7FLD9	2,3-bisphosphoglycerate-independent phosphoglycerate mutase OS=Medicago truncatula GN=MTR_7g074570 PE=2 SV=1	0	124.237	40	17	48	17	556	60.6	5.68	200.81	17	High	Not Found	Not Found	High	High	High	High	High	Not Found	High	Not Found	High	High	High	High	High	Not Found	High	High	High	High	High	High	High	1	0		0		Deamidated [Q256]
High	Master Protein	A0A072U553	Calcium-dependent phospholipid-binding copine family protein OS=Medicago truncatula GN=MTR_8g096190 PE=4 SV=1	0	122.461	38	17	104	17	579	63.6	5.44	424.24	17	Not Found	High	High	High	High	High	High	High	Not Found	High	High	High	High	High	High	High	High	High	High	High	High	High	High	High	1	0		0		Carboxymethyl [K233; K274]
High	Master Protein	A2Q199	Chaperone DnaK OS=Medicago truncatula GN=MTR_2g010020 PE=3 SV=1	0	224.792	53	33	147	17	676	72.4	5.68	534.05	33	Not Found	High	High	High	High	High	High	High	High	High	High	Not Found	Not Found	High	High	High	Not Found	High	High	Not Found	High	High	High	High	1	0		0		Deamidated [R618]
High	Master Protein	G7K1N3	LRR receptor-like kinase OS=Medicago truncatula GN=MTR_5g078080 PE=4 SV=1	0	114.135	28	20	100	17	632	69	7.64	317.6	20	High	High	Not Found	High	High	High	High	High	High	Not Found	High	High	High	High	High	High	High	Not Found	High	High	High	High	High	High	1	1	Phospho [S343]	0		Phospho [S343]
High	Master Protein	A0A072V3N8	T-complex protein 1 subunit delta OS=Medicago truncatula GN=MTR_3g109925 PE=3 SV=1	0	109.06	32	17	29	17	532	57.4	7.93	129.7	17	Not Found	High	High	High	High	High	High	High	Not Found	Not Found	High	Not Found	Not Found	High	Not Found	High	Not Found	High	High	High	High	High	High	Not Found	1	0		0
High	Master Protein	G7LIT8	Signal recognition particle subunit SRP68 OS=Medicago truncatula GN=MTR_8g100110 PE=3 SV=1	0	104.566	30	17	51	17	603	68	8.68	166.8	17	Not Found	High	High	Not Found	High	High	High	High	Not Found	High	High	Not Found	High	High	High	High	Not Found	High	High	High	High	High	High	High	1	0		0
High	Master Protein	A0A072TRX1	LRR receptor-like kinase OS=Medicago truncatula GN=MTR_8g070880 PE=3 SV=1	0	131.57	21	18	98	17	966	106.4	6.15	385.37	18	Not Found	High	High	High	High	High	High	High	Not Found	Not Found	High	High	High	High	High	High	Not Found	Not Found	High	High	High	High	High	High	1	0		0
High	Master Protein	A0A072TM71	Heterogeneous nuclear ribonucleoprotein OS=Medicago truncatula GN=MTR_8g007390 PE=4 SV=1	0	125.332	28	17	39	17	800	88.9	5.21	155.41	17	High	High	High	High	High	High	Not Found	High	Not Found	High	High	High	High	Not Found	Not Found	High	High	High	High	High	High	High	Not Found	High	1	0		0
High	Master Protein	A0A072UWD1	Alpha-1,4 glucan phosphorylase OS=Medicago truncatula GN=MTR_3g462340 PE=3 SV=1	0	108.586	25	17	46	17	840	95.4	5.88	172.23	17	High	High	Not Found	High	High	Not Found	High	High	High	High	High	High	High	High	High	High	High	Not Found	High	High	High	High	High	High	1	0		0
High	Master Protein	G7JFF5	Calcium-dependent lipid-binding (CaLB domain) family protein OS=Medicago truncatula GN=MTR_4g115660 PE=4 SV=1	0	114.676	32	17	83	17	566	63.5	6.33	262.94	17	High	High	High	High	High	High	High	High	High	Not Found	High	High	High	High	High	High	Not Found	Not Found	High	High	Not Found	High	High	High	1	1	Phospho [S406]	0		Deamidated [Q432]; Phospho [S406]
High	Master Protein	G7J5Y4	Glyceraldehyde-3-phosphate dehydrogenase OS=Medicago truncatula GN=MTR_3g115920 PE=3 SV=1	0	207.03	43	25	290	17	451	47.9	7.2	1074.38	25	High	High	High	High	High	High	High	High	High	High	High	High	High	High	High	High	High	High	High	High	High	High	High	High	1	0		0
High	Master Protein	G7KPU0	Elongation factor Ts, mitochondrial OS=Medicago truncatula GN=EFTS PE=3 SV=1	0	109.044	21	17	42	17	1054	114.5	4.84	141.84	17	High	High	High	High	High	High	High	High	Not Found	High	High	High	High	High	High	Not Found	Not Found	High	High	High	High	High	High	High	1	0		0
High	Master Protein	A0A072TLJ4	Protein ROOT HAIR DEFECTIVE 3 homolog OS=Medicago truncatula GN=MTR_8g016310 PE=3 SV=1	0	136.349	24	20	81	17	819	91	5.91	310.58	20	Not Found	High	High	High	High	High	High	High	Not Found	High	High	High	High	High	High	High	Not Found	High	High	High	High	High	High	High	1	0		0
High	Master Protein	G7ISD7	Ribosomal protein L15 OS=Medicago truncatula GN=MTR_2g014220 PE=3 SV=1	0	113.735	48	19	200	17	252	29.7	11.52	649.81	19	High	High	High	High	High	High	High	High	High	High	High	High	High	High	High	High	High	High	High	High	High	High	High	High	1	0		0		Deamidated [Q135; R191]
High	Master Protein	A0A072UR75	Methyltransferase PMT14-like protein, putative OS=Medicago truncatula GN=MTR_4g098890 PE=4 SV=1	0	127.49	14	22	88	17	1599	180.9	8.18	326.16	22	Not Found	High	High	High	High	High	High	High	Not Found	High	High	Not Found	High	High	High	High	Not Found	High	High	High	High	High	High	High	1	0		0		Deamidated [R228; Q1074]; Carboxymethyl [K238]
High	Master Protein	A0A072TPW7	Phosphoenolpyruvate carboxylase OS=Medicago truncatula GN=MTR_8g463920 PE=3 SV=1	0	193.706	35	31	76	17	967	110.5	5.88	297.66	31	High	High	High	High	Not Found	Not Found	High	High	Not Found	Not Found	High	High	Not Found	High	High	High	Not Found	Not Found	High	High	High	High	High	High	1	0		0		Carboxymethyl [K263]
High	Master Protein	G7KXA9	Aminopeptidase OS=Medicago truncatula GN=MTR_7g084200 PE=4 SV=1	0	150.894	32	17	74	17	491	56.7	5.55	309.1	17	Not Found	High	High	High	High	High	High	High	Not Found	Not Found	High	High	High	High	High	High	Not Found	Not Found	High	High	High	High	High	High	1	0		0
High	Master Protein	G7LIV6	Acetyl-CoA carboxylase biotin carboxylase subunit OS=Medicago truncatula GN=MTR_8g101330 PE=2 SV=2	0	97.792	33	17	55	17	542	59.4	7.66	207.64	17	Not Found	Not Found	High	High	High	Not Found	High	High	Not Found	Not Found	High	High	High	High	High	High	Not Found	Not Found	High	High	High	High	High	High	1	0		0
High	Master Protein	A0A072URQ8	ABC transporter B family protein OS=Medicago truncatula GN=MTR_4g109720 PE=4 SV=1	0	106.653	28	18	65	17	633	68.4	8.16	244.03	18	High	High	High	High	High	High	High	High	High	High	High	High	High	High	High	High	High	Not Found	High	High	High	High	High	High	1	0		0
High	Master Protein	G7IFI1	LRR receptor-like kinase OS=Medicago truncatula GN=MTR_2g014960 PE=4 SV=1	0	151.656	23	17	91	17	934	102.7	6	356.44	17	Not Found	Not Found	High	High	High	High	High	High	Not Found	Not Found	High	High	High	High	High	High	Not Found	Not Found	High	High	High	High	High	High	1	0		0
High	Master Protein	A0A072UNI9	White-brown-complex ABC transporter family protein OS=Medicago truncatula GN=MTR_4g076940 PE=4 SV=1	0	120.703	22	17	71	17	733	82	8.9	269.56	17	Not Found	High	High	High	High	High	High	High	Not Found	High	High	High	High	High	High	High	Not Found	Not Found	High	High	High	High	High	High	1	3	Phospho [S702; S722; S729]	0		Phospho [S702; S722; S729]; Deamidated [R92]
High	Master Protein	G7J5X1	Methyltransferase OS=Medicago truncatula GN=MTR_3g114780 PE=3 SV=1	0	129.387	38	17	85	17	360	40	6.39	331.53	17	Not Found	High	High	High	High	High	High	High	Not Found	Not Found	High	High	High	High	High	High	Not Found	High	High	High	High	High	High	High	1	0		0
High	Master Protein	A0A072U3T1	Flavin-binding monooxygenase-like protein OS=Medicago truncatula GN=MTR_7g107710 PE=4 SV=1	0	123.952	41	17	57	17	384	43.1	8.54	272.98	17	High	High	High	High	High	High	High	High	High	High	High	Not Found	High	High	High	High	Not Found	High	Not Found	Not Found	High	High	High	High	1	0		0
High	Master Protein	G7KGA4	FG-GAP repeat protein OS=Medicago truncatula GN=MTR_5g021150 PE=4 SV=2	0	114.275	24	17	85	17	697	77.6	7.93	310.16	17	High	High	Not Found	High	High	High	High	High	High	High	High	High	High	High	High	High	High	High	High	High	High	High	High	High	1	0		0
High	Master Protein	G7I9H7	Lon protease homolog, mitochondrial OS=Medicago truncatula GN=MTR_1g084020 PE=3 SV=2	0	94.83	22	17	33	17	977	108.4	5.83	118	17	High	High	High	High	High	High	High	High	High	High	High	Not Found	High	High	High	High	High	Not Found	Not Found	Not Found	High	High	Not Found	High	1	0		0		Deamidated [Q669]
High	Master Protein	G7ITZ5	Aconitate hydratase OS=Medicago truncatula GN=MTR_2g088360 PE=3 SV=1	0	219.924	34	30	150	16	979	107	7.72	543.85	30	Not Found	Not Found	High	High	High	High	High	High	Not Found	High	High	High	High	High	High	High	Not Found	Not Found	High	High	High	High	High	High	1	0		0
High	Master Protein	A0A072UGQ1	Coatomer subunit beta OS=Medicago truncatula GN=MTR_4g008250 PE=4 SV=1	0	131.193	21	16	57	16	951	106	5.87	240.9	16	Not Found	High	High	High	High	High	High	High	Not Found	Not Found	High	High	High	High	High	High	Not Found	Not Found	High	High	High	High	High	High	1	0		0		Deamidated [Q669]
High	Master Protein	Q84UC1	Glutamine synthetase OS=Medicago truncatula GN=GS2 PE=2 SV=1	0	160.42	42	17	183	16	428	47	6.73	679.38	17	High	High	High	High	High	High	High	High	Not Found	High	High	High	High	High	High	High	High	High	High	High	High	High	High	High	1	0		0		Deamidated [Q186; R367]; Carboxymethyl [K311]
High	Master Protein	G7J9S5	LRR receptor-like kinase family protein OS=Medicago truncatula GN=MTR_3g094710 PE=4 SV=2	0	93.785	21	17	50	16	1033	113.4	6.76	159.38	17	Not Found	Not Found	Not Found	High	High	High	High	High	Not Found	Not Found	High	High	High	High	High	High	Not Found	Not Found	High	High	High	High	High	High	1	0		0		Deamidated [Q482]
High	Master Protein	A0A072UB64	Chaperone dnaJ-like protein OS=Medicago truncatula GN=MTR_7g066250 PE=4 SV=1	0	121.706	41	16	99	16	423	46.4	6.99	358.19	16	Not Found	High	High	High	High	High	High	High	High	High	High	High	High	High	High	High	High	High	High	High	High	High	High	High	1	1	Phospho [S18]	0		Phospho [S18]
High	Master Protein	G7JR54	Guanine nucleotide-exchange protein, putative OS=Medicago truncatula GN=MTR_4g124430 PE=4 SV=2	0	103.959	12	16	48	16	1788	198.1	5.57	177.24	16	High	High	High	High	High	High	High	High	High	High	High	High	High	High	High	High	High	High	High	High	High	High	High	High	1	0		0		Deamidated [Q1447]
High	Master Protein	G7JM35	Peptidylprolyl isomerase OS=Medicago truncatula GN=MTR_4g055500 PE=4 SV=2	0	113.49	30	16	48	16	626	70.7	5.52	197.51	16	High	High	High	High	High	High	High	Not Found	High	Not Found	High	High	High	High	Not Found	High	Not Found	Not Found	High	High	High	Not Found	High	High	1	0		0		Deamidated [R74]
High	Master Protein	A0A072VA30	Calcium-dependent lipid-binding domain protein OS=Medicago truncatula GN=MTR_2g072180 PE=4 SV=1	0	100.877	25	16	33	16	758	85.5	7.15	110.87	16	High	High	High	High	High	High	High	Not Found	Not Found	High	High	Not Found	High	High	Not Found	High	Not Found	High	High	High	High	Medium	High	Not Found	1	0		0
High	Master Protein	G7JYQ8	Aconitate hydratase OS=Medicago truncatula GN=MTR_5g022940 PE=3 SV=1	0	150.26	32	23	106	16	901	98.3	6.55	341.63	23	Not Found	Not Found	High	High	High	High	High	High	Not Found	Not Found	High	High	High	High	High	High	Not Found	Not Found	High	High	High	High	High	High	1	1	Phospho [S179]	0		Carboxymethyl [K379]; Phospho [S179]; Deamidated [Q856]
High	Master Protein	A0A072UTY2	Transmembrane protein, putative OS=Medicago truncatula GN=MTR_4g033475 PE=4 SV=1	0	91.197	39	16	81	16	245	28.2	9.88	223.4	16	Not Found	High	High	High	High	High	High	High	Not Found	High	High	High	High	High	High	High	Not Found	High	High	High	High	High	High	High	1	0		0
High	Master Protein	A0A072TVH5	Heat shock protein 81-2 OS=Medicago truncatula GN=MTR_0009s0390 PE=3 SV=1	0	169.739	38	23	101	16	791	89.8	5.14	413.12	23	Not Found	Not Found	High	High	High	High	High	High	Not Found	High	High	High	High	High	High	High	Not Found	Not Found	High	High	High	High	High	High	1	0		0		Deamidated [R386]
High	Master Protein	G7LA51	Methyltransferase PMT2-like protein OS=Medicago truncatula GN=MTR_8g055840 PE=4 SV=1	0	163.809	47	25	144	16	610	69	7.2	544.05	25	Not Found	High	High	High	High	High	High	High	Not Found	High	High	High	High	High	High	High	Not Found	Not Found	Not Found	High	High	High	High	High	1	0		0
High	Master Protein	A0A072TXL0	Monodehydroascorbate reductase OS=Medicago truncatula GN=MTR_7g034715 PE=4 SV=1	0	99.733	29	16	126	16	483	52.2	8.02	435.93	16	High	High	High	High	High	High	High	High	High	High	High	High	High	High	High	High	High	High	High	High	High	High	High	High	1	0		0
High	Master Protein	A0A072VSU0	ABC transporter B family protein OS=Medicago truncatula GN=MTR_1g115430 PE=4 SV=1	0	212.351	25	28	83	16	1395	154.8	6.58	410.93	28	High	High	High	High	High	Not Found	High	High	Not Found	High	High	High	Not Found	High	High	High	Not Found	High	High	Not Found	Not Found	High	High	High	1	1	Phospho [S732]	0		Phospho [S732]; Deamidated [Q1204]
High	Master Protein	G7JAP0	Sedoheptulose-1,7-bisphosphatase OS=Medicago truncatula GN=MTR_3g070100 PE=4 SV=1	0	115.811	38	16	102	16	387	41.9	6.87	355.9	16	Not Found	High	High	High	High	High	High	High	Not Found	High	High	High	High	High	High	High	Not Found	Not Found	High	High	High	High	High	High	1	0		0
High	Master Protein	G7L0K5	Nuclear pore complex Nup205-like protein OS=Medicago truncatula GN=MTR_7g099880 PE=4 SV=2	0	58.72	9	16	36	16	1883	212	5.49	105.28	16	High	High	Not Found	High	High	High	High	High	High	Not Found	High	High	High	High	High	High	High	Not Found	High	Medium	High	High	High	High	1	0		0		Deamidated [Q869]
High	Master Protein	A0A072TS91	Carnitine/acylcarnitine carrier-like protein OS=Medicago truncatula GN=MTR_8g066975 PE=3 SV=1	0	206.36	53	19	296	16	297	30.7	9.35	1303.9	19	High	High	High	High	High	High	High	High	High	High	High	High	High	High	High	High	High	High	High	High	High	High	High	High	1	0		0		Deamidated [Q33; Q35; Q42]
High	Master Protein	A0A072TSK6	Porin/voltage-dependent anion-selective channel protein OS=Medicago truncatula GN=MTR_8g469150 PE=4 SV=1	0	208.848	45	19	342	16	278	29.8	7.62	1259.77	19	High	High	High	High	High	High	High	High	High	High	High	High	High	High	High	High	High	High	High	High	High	High	High	High	1	1	Phospho [S238]	0		Deamidated [R78; Q101; Q242; Q263]; Phospho [S238]
High	Master Protein	G7K7Q7	ABC-type transport system protein OS=Medicago truncatula GN=MTR_5g088340 PE=4 SV=2	0	131.055	52	16	58	16	382	42	9.07	263.51	16	Not Found	High	High	High	High	High	High	High	Not Found	Not Found	High	High	High	Not Found	High	High	Not Found	Not Found	High	High	High	High	High	High	1	0		0
High	Master Protein	G7J648	Cobalamin-independent methionine synthase OS=Medicago truncatula GN=MTR_3g079640 PE=3 SV=1	0	104.312	28	23	62	16	813	90.6	7.23	199.16	23	High	High	Not Found	High	Not Found	High	High	High	High	High	High	High	Not Found	High	Not Found	High	High	High	High	High	High	High	Not Found	High	1	0		0		Deamidated [Q651]
High	Master Protein	G7JT48	Phosphoribulokinase/uridine kinase-like protein OS=Medicago truncatula GN=MTR_4g112790 PE=4 SV=2	0	96.151	30	18	59	16	665	74.4	6.98	196.14	18	Not Found	Not Found	High	High	High	High	High	High	Not Found	Not Found	High	High	High	High	High	High	Not Found	Not Found	High	High	High	High	High	High	1	0		0
High	Master Protein	B7FJH0	Prohibitin complex protein OS=Medicago truncatula GN=MTR_3g008250 PE=2 SV=1	0	273.007	77	23	230	16	278	30.3	8.88	966.84	23	High	High	High	High	High	High	High	High	High	High	High	High	High	High	High	High	High	High	High	High	High	High	High	High	1	0		0		Deamidated [Q38; Q194]
High	Master Protein	G7JK45	Monocopper oxidase SKS1-like protein OS=Medicago truncatula GN=MTR_4g101650 PE=4 SV=1	0	172.148	28	17	168	16	590	66.2	8.91	667.53	17	High	High	High	High	High	High	High	High	Not Found	High	High	High	High	High	High	High	High	High	High	High	High	High	High	High	1	0		0
High	Master Protein	G7IDU4	Protein disulfide isomerase-like protein OS=Medicago truncatula GN=MTR_1g087520 PE=3 SV=2	0	191.772	50	18	128	16	364	40.4	5.49	587.08	18	High	High	High	High	High	High	High	High	High	High	High	High	High	High	High	High	High	High	High	High	High	High	High	High	1	0		0		Deamidated [R242]
High	Master Protein	G7JBT5	Clathrin heavy chain OS=Medicago truncatula GN=MTR_3g070940 PE=3 SV=2	0	495.893	33	55	319	16	1705	193	5.5	1354.96	55	Not Found	High	High	High	High	High	High	High	High	High	High	High	High	High	High	High	Not Found	High	High	High	High	High	High	High	1	0		0
High	Master Protein	Q84RD9	Adenosylhomocysteinase OS=Medicago truncatula GN=AHC1 PE=3 SV=1	0	178.081	35	23	127	16	485	53.3	5.91	498.76	23	High	High	High	High	High	High	High	High	High	High	High	High	High	High	High	High	High	High	High	Not Found	High	High	High	High	1	0		0		Deamidated [Q466]
High	Master Protein	A0A072VRS6	D-glycerate dehydrogenase/hydroxypyruvate reductase OS=Medicago truncatula GN=MTR_1g112510 PE=3 SV=1	0	149.454	49	16	82	16	386	42.2	7.42	352.19	16	Not Found	High	High	High	High	High	High	High	Not Found	Not Found	High	High	High	High	High	High	Not Found	Not Found	High	High	High	High	High	High	1	0		0
High	Master Protein	G7JPU6	NAD-dependent aldehyde dehydrogenase family protein OS=Medicago truncatula GN=MTR_4g107040 PE=3 SV=2	0	160.29	43	26	108	16	544	59.2	8.13	374.19	26	Not Found	High	High	High	High	Not Found	High	High	Not Found	High	High	High	High	High	High	High	Not Found	High	High	High	High	Not Found	High	Medium	1	0		0
High	Master Protein	S4T0X8	ATP synthase subunit alpha OS=Medicago truncatula GN=atpA PE=3 SV=1	0	508.062	51	35	1032	16	511	55.8	5.41	3783.09	35	High	High	High	High	High	High	High	High	High	High	High	High	High	High	High	High	High	High	High	High	High	High	High	High	1	4	Phospho [T29; T31; T92; S205]	0		Deamidated [Q18; Q19; Q34; Q97; R119; Q208; Q214; Q389; Q506]; Phospho [T29; T31; T92; S205]
High	Master Protein	G7KY60	Non-green plastid inner envelope membrane protein OS=Medicago truncatula GN=MTR_7g073340 PE=2 SV=2	0	195.839	33	16	223	16	310	33.8	6.62	1145.83	16	High	High	High	High	High	High	High	High	High	High	High	High	High	High	High	High	High	High	High	High	High	High	High	High	1	1	Phospho [S112]	0		Deamidated [Q109; Q113; Q128; Q133]; Phospho [S112]
High	Master Protein	G7KK16	p-loop nucleoside triphosphate hydrolase superfamily protein OS=Medicago truncatula GN=MTR_6g009520 PE=3 SV=1	0	143.077	42	23	91	16	520	60.7	7.06	336.75	23	High	High	High	High	High	High	High	High	High	Not Found	High	High	High	High	High	High	Not Found	Not Found	Not Found	High	High	High	High	High	1	0		0
High	Master Protein	B3GN62	EIN2-like protein, nramp transporter OS=Medicago truncatula GN=Skl1 PE=2 SV=1	0	128.939	20	16	47	16	1309	142.2	5.9	200.94	16	Not Found	High	High	High	High	High	High	Not Found	Not Found	High	High	High	High	High	High	High	Not Found	Not Found	High	High	Not Found	High	Not Found	Not Found	1	1	Phospho [S643]	0		Phospho [S643]
High	Master Protein	G7LFK4	Vacuolar H+-ATPase subunit H, putative OS=Medicago truncatula GN=MTR_8g078370 PE=4 SV=2	0	72.199	33	16	88	16	486	55.3	7.24	240.68	16	Not Found	High	High	High	High	High	High	High	Not Found	High	High	High	High	High	High	High	Not Found	High	High	High	High	High	High	High	1	0		0
High	Master Protein	Q2HUK6	Mitochondrial substrate carrier OS=Medicago truncatula GN=MTR_7g083790 PE=3 SV=1	0	129.932	37	18	221	16	373	39.5	9.25	685.44	18	High	High	High	High	High	High	High	High	High	High	High	High	High	High	High	High	High	High	High	High	High	High	High	High	1	0		0		Deamidated [Q204; Q206]
High	Master Protein	G7I9U9	Heterotrimeric GTP-binding protein alpha subunit, putative OS=Medicago truncatula GN=MTR_1g015750 PE=4 SV=1	0	86.45	46	16	42	16	384	44.8	5.86	140.03	16	High	High	High	High	High	Not Found	High	High	Not Found	High	High	High	High	High	High	Not Found	Not Found	High	High	High	High	High	High	High	1	0		0
High	Master Protein	G7KQW9	Signal recognition particle 54 kDa protein OS=Medicago truncatula GN=MTR_7g104890 PE=3 SV=1	0	86.567	29	16	33	16	553	60.8	9.32	126.42	16	Not Found	Not Found	High	High	High	High	High	High	Not Found	Not Found	High	High	Not Found	High	High	Not Found	Not Found	Not Found	High	High	High	High	High	High	1	0		0
High	Master Protein	A0A072VDE6	26S proteasome regulatory particle triple-A ATPase protein OS=Medicago truncatula GN=MTR_3g112260 PE=3 SV=1	0	104.998	46	17	73	16	399	44.7	8.19	289.42	17	Not Found	High	High	High	High	High	High	High	Not Found	High	High	High	High	High	High	High	Not Found	High	High	High	High	High	High	High	1	0		0
High	Master Protein	A0A072VGP8	Transmembrane protein, putative OS=Medicago truncatula GN=MTR_1g039490 PE=4 SV=1	0	166.418	47	16	118	16	318	35.5	9.48	514.03	16	High	High	High	High	High	High	High	High	High	High	High	High	High	High	High	High	High	High	High	High	High	High	High	High	1	0		0
High	Master Protein	A2Q5N9	Galactose mutarotase-like OS=Medicago truncatula GN=MTR_7g085490 PE=4 SV=1	0	146.416	53	16	183	16	355	39.2	7.84	673.06	16	High	High	High	High	High	High	High	High	Not Found	High	High	High	High	High	High	High	High	High	High	High	High	High	High	High	1	0		0		Deamidated [R58; R66]
High	Master Protein	G7K1D4	Carbonic anhydrase OS=Medicago truncatula GN=MTR_5g034250 PE=3 SV=1	0	225.504	54	17	142	16	278	30.4	6.54	653.8	17	High	High	High	High	High	High	High	High	High	High	High	High	High	High	High	High	High	High	High	High	High	High	High	High	1	1	Phospho [S117]	0		Deamidated [R73; Q123]; Phospho [S117]
High	Master Protein	G7KN36	Plant synaptotagmin OS=Medicago truncatula GN=MTR_6g084400 PE=4 SV=1	0	92.041	23	19	60	16	828	93.3	7.11	170.21	19	Not Found	High	High	High	High	High	High	Not Found	Not Found	High	High	High	High	High	Not Found	High	Not Found	High	High	High	High	High	Medium	Medium	1	0		0
High	Master Protein	G7KU89	LRR receptor-like kinase OS=Medicago truncatula GN=MTR_7g081720 PE=4 SV=1	0	118.469	18	16	55	16	1078	119.8	7.85	207.98	16	Not Found	High	High	High	High	High	High	High	Not Found	Medium	High	High	High	High	High	High	Not Found	Not Found	Not Found	High	High	High	High	High	1	0		0		Deamidated [Q1062]
High	Master Protein	G7JQ45	AMP deaminase OS=Medicago truncatula GN=MTR_4g016980 PE=4 SV=1	0	85.406	26	18	51	16	835	95.1	6.7	161.42	18	Not Found	High	High	High	High	High	High	High	Not Found	Not Found	High	High	High	High	High	High	Not Found	Not Found	Not Found	High	High	High	Not Found	Not Found	1	1	Phospho [S198]	0		Phospho [S198]
High	Master Protein	G7IY76	Enhancer of mRNA-decapping-like protein OS=Medicago truncatula GN=MTR_3g061160 PE=4 SV=1	0	105.503	15	17	49	16	1383	150.7	6.19	179.7	17	Not Found	High	High	High	High	High	High	High	Not Found	High	High	High	High	High	High	Not Found	Not Found	High	High	High	High	High	High	Not Found	1	0		0
High	Master Protein	A0A072TNQ7	Phosphatidylcholine-sterol acyltransferase OS=Medicago truncatula GN=MTR_8g019570 PE=4 SV=1	0	67.771	21	16	58	16	677	75.5	6.84	165.08	16	Not Found	Not Found	High	High	High	High	High	High	Not Found	High	High	High	High	High	High	High	Not Found	Not Found	High	High	High	High	High	High	1	0		0
High	Master Protein	G7IXL4	Heat shock 70 kDa protein OS=Medicago truncatula GN=MTR_3g051300 PE=3 SV=1	0	89.525	20	16	34	16	774	86.7	5.4	113.27	16	High	High	High	High	Not Found	High	Not Found	High	High	High	High	High	Not Found	High	High	High	Not Found	High	High	High	Not Found	Not Found	High	High	1	0		0
High	Master Protein	G7LA71	Adipocyte plasma membrane-associated-like protein OS=Medicago truncatula GN=MTR_8g074270 PE=4 SV=1	0	211.504	36	16	161	16	375	41.4	5.97	792.97	16	Not Found	High	High	High	High	High	High	High	Not Found	Not Found	High	High	High	High	High	High	Not Found	High	High	High	High	High	High	High	1	0		0		Deamidated [R201]
High	Master Protein	A0A072UNG5	Amine oxidase OS=Medicago truncatula GN=MTR_4g094295 PE=4 SV=1	0	95.484	29	16	59	16	470	51.5	7.33	205.59	16	Not Found	High	High	High	High	High	High	High	Not Found	High	High	High	High	High	High	High	Not Found	High	High	High	High	High	High	High	1	0		0
High	Master Protein	G7J960	3-ketoacyl-CoA synthase OS=Medicago truncatula GN=MTR_3g105550 PE=3 SV=1	0	94.39	25	16	69	16	537	60.6	8.72	249.45	16	Not Found	High	High	High	High	High	High	High	Not Found	High	High	High	High	High	High	High	High	Not Found	High	High	High	High	High	High	1	0		0
High	Master Protein	A0A072VB19	Calcium-binding EF-hand protein OS=Medicago truncatula GN=MTR_2g078240 PE=3 SV=1	0	149.675	28	16	125	16	443	49.4	5.78	502.39	16	High	High	High	High	High	High	High	High	High	High	High	High	High	High	High	High	High	High	High	High	High	High	High	High	1	1	Phospho [T249]	0		Phospho [T249]
High	Master Protein	Q9T0M6	Sucrose synthase OS=Medicago truncatula GN=sucS1 PE=2 SV=1	0	128.881	31	21	57	16	805	92.2	6.25	247.44	21	Not Found	Not Found	High	High	High	High	High	High	Not Found	Not Found	High	High	High	High	High	High	Not Found	Not Found	Not Found	High	High	High	High	High	1	0		0		Deamidated [Q403]
High	Master Protein	G7J9M6	60S ribosomal protein L6 OS=Medicago truncatula GN=MTR_3g093110 PE=2 SV=1	0	163.797	69	18	159	16	193	21.7	9.28	637.47	18	High	High	High	High	High	High	High	High	Not Found	High	High	High	High	High	High	High	High	High	High	High	High	High	High	High	1	0		0		Deamidated [R158]
High	Master Protein	G7IC40	Phosphogluco-mutase OS=Medicago truncatula GN=MTR_1g102010 PE=4 SV=1	0	105.23	33	16	72	16	628	68.5	6.21	275.16	16	Not Found	Not Found	High	High	High	High	High	High	Not Found	Not Found	High	High	High	High	High	High	Not Found	Not Found	Not Found	High	High	High	High	High	1	0		0
High	Master Protein	G7J5D6	Transmembrane protein, putative OS=Medicago truncatula GN=MTR_3g077550 PE=4 SV=2	0	100.639	12	16	50	16	1082	120.2	9.23	183.46	16	Not Found	High	High	High	High	High	High	High	Not Found	Not Found	High	High	High	High	High	High	Not Found	Not Found	High	High	High	High	High	Not Found	1	0		0		Deamidated [Q981]
High	Master Protein	A0A072UTJ9	Beta-glucosidase OS=Medicago truncatula GN=MTR_4g122980 PE=3 SV=1	0	98.17	26	16	64	16	632	71.9	6.1	201.82	16	High	High	High	High	High	High	High	High	Not Found	Not Found	High	High	High	High	High	High	High	Not Found	High	High	High	High	High	High	1	0		0
High	Master Protein	G7J9P9	Protein translocase, putative OS=Medicago truncatula GN=MTR_3g093380 PE=4 SV=1	0	186.062	38	16	181	16	263	28	9.8	799.42	16	Not Found	High	High	High	High	High	High	High	High	High	High	High	High	High	High	High	Not Found	Not Found	High	High	High	High	High	High	1	0		0		Deamidated [Q17]
High	Master Protein	G7J950	Eukaryotic translation initiation factor 3 subunit B OS=Medicago truncatula GN=MTR_3g105430 PE=3 SV=2	0	102.579	22	16	30	16	716	82.1	5.12	123.6	16	Not Found	High	High	Not Found	High	Not Found	High	High	Not Found	Not Found	High	Not Found	High	High	High	High	Not Found	Not Found	High	Not Found	High	Not Found	High	High	1	0		0
High	Master Protein	G7JNV8	Peroxisomal membrane PEX14-like protein, putative OS=Medicago truncatula GN=MTR_4g106880 PE=4 SV=2	0	166.619	39	16	90	16	523	57	5.53	395.7	16	High	High	High	High	High	High	High	High	High	High	High	High	High	High	High	High	High	High	High	High	High	High	High	High	1	1	Phospho [S311]	0		Phospho [S311]
High	Master Protein	G7JHL9	LRR receptor-like kinase OS=Medicago truncatula GN=MTR_4g098740 PE=4 SV=2	0	123.829	38	17	47	16	498	55.9	6.34	167.45	17	Not Found	High	High	High	Not Found	High	High	High	Not Found	High	High	High	High	Not Found	High	High	Not Found	Not Found	Not Found	High	High	High	High	High	1	0		0
High	Master Protein	A0A072UMS0	Guanylate-binding family protein OS=Medicago truncatula GN=MTR_4g088220 PE=4 SV=1	0	75.843	18	15	31	15	1060	120.7	7.3	111.37	15	High	High	High	High	Not Found	High	Not Found	High	Not Found	High	Not Found	High	High	High	Not Found	Not Found	High	High	High	High	High	Not Found	Not Found	Not Found	1	0		0
High	Master Protein	G7LE71	Sel1 repeat protein OS=Medicago truncatula GN=MTR_8g107400 PE=4 SV=2	0	90.94	32	15	27	15	674	75.5	6.29	113.1	15	Not Found	High	High	High	Not Found	Not Found	High	High	Not Found	High	High	High	High	High	Not Found	High	Not Found	Not Found	High	High	High	High	Not Found	High	1	0		0		Deamidated [Q503]
High	Master Protein	A0A072VAY8	NADPH-protochlorophyllide oxidoreductase OS=Medicago truncatula GN=MTR_2g079710 PE=4 SV=1	0	119.352	33	15	89	15	399	43	9.07	336.54	15	Not Found	High	High	Not Found	High	High	High	High	Not Found	High	High	High	High	High	High	High	Not Found	High	High	High	High	High	High	High	1	0		0
High	Master Protein	G7K980	Terpene cyclase/mutase family member OS=Medicago truncatula GN=MTR_5g008810 PE=3 SV=1	0	100.584	21	16	39	15	757	86.4	6.58	141.18	16	Not Found	High	High	High	High	High	High	High	Not Found	High	High	Not Found	Not Found	High	High	Not Found	Not Found	High	High	High	Not Found	Not Found	High	High	1	0		0
High	Master Protein	A0A072U566	Peptidyl-prolyl cis-trans isomerase OS=Medicago truncatula GN=MTR_6g007607 PE=4 SV=1	0	184.295	41	15	78	15	455	50	5.31	366.65	15	Not Found	Not Found	High	High	High	High	High	Not Found	Not Found	Not Found	High	High	High	High	Not Found	High	Not Found	Not Found	High	High	High	High	High	Not Found	1	0		0
High	Master Protein	G7K4B9	Glycerophosphoryl diester phosphodiesterase family protein OS=Medicago truncatula GN=MTR_5g094230 PE=4 SV=1	0	185.804	25	15	269	15	754	81.3	6.24	1061.49	15	High	High	High	High	High	High	High	High	High	High	High	High	High	High	High	High	High	High	High	High	High	High	High	High	1	1	Phospho [T509]	0		Carboxymethyl [K394]; Deamidated [Q504; Q527; Q586]; Phospho [T509]
High	Master Protein	A0A072V5J0	Phospholipid-transporting ATPase OS=Medicago truncatula GN=MTR_3g037330 PE=3 SV=1	0	92.871	15	16	31	15	1154	130.8	7.37	121.38	16	Not Found	High	High	High	Not Found	Not Found	High	Not Found	Not Found	High	High	High	Not Found	Not Found	Not Found	High	Not Found	High	High	High	Not Found	Not Found	Not Found	High	1	0		0
High	Master Protein	G7JFK4	Eukaryotic translation initiation factor iso4G OS=Medicago truncatula GN=MTR_4g130570 PE=4 SV=1	0	79.477	23	15	44	15	779	85.3	6.67	152.3	15	High	High	High	High	Not Found	High	High	High	Not Found	Not Found	High	High	High	High	High	High	High	High	High	High	High	High	High	High	1	0		0
High	Master Protein	A0A072TP47	Methyltransferase OS=Medicago truncatula GN=MTR_8g432680 PE=4 SV=1	0	113.76	26	18	45	15	638	73.2	8.43	180.62	18	Not Found	High	High	Not Found	Not Found	High	High	High	Not Found	High	Not Found	Not Found	Not Found	High	High	High	Not Found	High	Not Found	High	High	Not Found	High	High	1	0		0
High	Master Protein	G7LIP6	Dicarboxylate carrier protein OS=Medicago truncatula GN=MTR_8g086070 PE=3 SV=1	0	136.66	41	15	233	15	301	32.2	9.33	811.85	15	High	High	High	High	High	High	High	High	High	High	High	High	High	High	High	High	High	High	High	High	High	High	High	High	1	1	Phospho [T151]	0		Deamidated [Q49; Q155]; Carboxymethyl [K61; K245; K257]; Phospho [T151]
High	Master Protein	A0A072VKS3	1-phosphatidylinositol phosphodiesterase-like protein OS=Medicago truncatula GN=MTR_1g060050 PE=4 SV=1	0	186.209	48	15	152	15	317	36.1	7.33	627.18	15	Not Found	High	High	High	High	High	High	High	Not Found	High	High	High	High	High	High	High	Not Found	High	High	High	High	High	High	High	1	0		0
High	Master Protein	G7IJ55	U5 small nuclear ribonucleoprotein 200 kDa helicase OS=Medicago truncatula GN=MTR_2g064740 PE=4 SV=2	0	108.99	11	18	27	15	2188	248.1	5.77	104.15	18	Not Found	High	High	High	Not Found	Not Found	High	High	Not Found	High	High	High	Not Found	High	Not Found	High	Not Found	Not Found	High	High	Not Found	High	High	High	1	0		0
High	Master Protein	G7I390	Endoplasmic reticulum metallopeptidase-like protein OS=Medicago truncatula GN=MTR_1g095040 PE=4 SV=2	0	119.93	20	15	82	15	912	99.3	7.05	329.6	15	Not Found	Not Found	Not Found	High	High	High	High	High	High	Not Found	Not Found	High	High	High	High	High	High	Not Found	Not Found	High	High	High	High	High	1	0		0
High	Master Protein	G7KQ23	Galactose-1-phosphate uridylyltransferase OS=Medicago truncatula GN=MTR_6g029530 PE=4 SV=1	0	58.754	22	15	33	15	679	77.5	8.63	106.35	15	Not Found	Not Found	High	High	High	High	Not Found	High	Not Found	Not Found	High	Medium	High	High	High	High	Not Found	Not Found	High	High	High	Not Found	High	High	1	0		0
High	Master Protein	A0A072UH44	DUF2921 family protein OS=Medicago truncatula GN=MTR_4g011610 PE=4 SV=1	0	83.501	17	15	39	15	1062	119.9	6.58	141.55	15	Not Found	High	High	Not Found	High	High	High	High	Not Found	High	High	High	High	High	High	High	Not Found	High	High	Medium	Not Found	High	High	High	1	0		0		Carboxymethyl [K723]
High	Master Protein	G7JEX0	Membrane-associated 30 kDa protein OS=Medicago truncatula GN=MTR_4g068210 PE=2 SV=1	0	118.429	45	15	67	15	319	35.1	9.5	279.16	15	Not Found	High	High	High	High	High	High	High	Not Found	High	High	High	High	High	High	Not Found	Not Found	High	High	High	High	High	High	High	1	0		0
High	Master Protein	G7JB78	Nuclear pore complex-like protein OS=Medicago truncatula GN=MTR_3g070390 PE=4 SV=2	0	100.808	24	15	32	15	806	89.8	6.74	137.8	15	High	Not Found	Not Found	High	High	High	High	High	High	High	High	High	High	Not Found	High	High	High	Not Found	Not Found	Not Found	High	Not Found	Not Found	High	1	0		0
High	Master Protein	A0A072V9A7	Calcium-binding EF-hand protein OS=Medicago truncatula GN=MTR_2g078340 PE=4 SV=1	0	137.212	44	15	51	15	413	46.8	6.16	285.43	15	Not Found	High	High	High	High	High	High	High	Not Found	High	High	High	High	High	High	High	Not Found	High	High	High	High	High	High	High	1	1	Phospho [S57]	0		Deamidated [Q58; Q137]; Phospho [S57]; Carboxymethyl [K141]
High	Master Protein	G7KXB3	Tyrosine kinase family protein OS=Medicago truncatula GN=MTR_7g084250 PE=4 SV=1	0	87.169	37	15	49	15	379	42.4	7.27	186.74	15	Not Found	High	High	High	High	Not Found	Not Found	High	Not Found	High	High	High	High	High	High	High	Not Found	High	High	High	High	High	High	High	1	0		0		Deamidated [R108; Q114]
High	Master Protein	G7K9G7	Thioredoxin-like protein OS=Medicago truncatula GN=MTR_5g018580 PE=4 SV=1	0	114.3	57	15	86	15	263	29.4	6.61	312.29	15	High	High	High	High	High	High	High	High	High	High	High	High	High	High	High	High	High	High	High	High	High	High	High	High	1	0		0		Deamidated [Q220]
High	Master Protein	G7I8F2	Long-chain fatty acyl CoA ligase, putative OS=Medicago truncatula GN=MTR_1g030290 PE=4 SV=1	0	153.413	25	19	141	15	696	76.3	7.12	518.65	19	Not Found	High	High	High	High	High	High	High	Not Found	High	High	High	High	High	High	High	Not Found	High	High	High	High	High	High	High	1	0		0		Deamidated [Q36]
High	Master Protein	G7IAX8	Plastid lipid-associated protein OS=Medicago truncatula GN=MTR_1g116320 PE=4 SV=1	0	130.631	37	15	73	15	388	42.8	7.84	303.86	15	Not Found	High	High	High	High	High	High	High	Not Found	Not Found	High	High	High	High	High	High	Not Found	Not Found	High	High	High	High	High	High	1	0		0
High	Master Protein	G7IDL0	Kinase interacting (KIP1-like) family protein OS=Medicago truncatula GN=MTR_1g071540 PE=4 SV=1	0	86.056	10	15	22	15	1796	206.2	5.12	88.74	15	High	High	High	High	High	Not Found	Not Found	Not Found	High	High	High	Medium	Not Found	High	Not Found	Not Found	High	High	Not Found	Not Found	High	Not Found	Medium	Not Found	1	0		0
High	Master Protein	G7JML2	Glyceraldehyde-3-phosphate dehydrogenase OS=Medicago truncatula GN=MTR_4g103920 PE=3 SV=1	0	253.109	64	24	288	15	339	36.6	7.05	1152.65	24	High	High	High	High	High	High	High	High	High	High	High	High	High	High	High	High	High	High	High	High	High	High	High	High	1	0		0
High	Master Protein	A0A072UMH4	Lipoxygenase OS=Medicago truncatula GN=MTR_4g066170 PE=3 SV=1	0	122.222	28	17	46	15	906	103.5	5.64	198.47	17	Not Found	High	High	High	High	High	High	High	Not Found	Not Found	Not Found	High	High	High	High	High	Not Found	High	Not Found	High	High	High	High	High	1	0		0
High	Master Protein	G7JXA7	Alpha-glucosidase OS=Medicago truncatula GN=MTR_5g057990 PE=3 SV=1	0	80.719	20	15	48	15	926	102.9	6.77	154.56	15	Not Found	Not Found	High	High	High	High	High	High	Not Found	Not Found	High	High	High	High	High	High	Not Found	Not Found	High	High	High	Not Found	High	High	1	0		0
High	Master Protein	G7JHV6	Pyruvate orthophosphate dikinase OS=Medicago truncatula GN=MTR_4g118350 PE=4 SV=2	0	106.798	33	15	39	15	624	68.3	7.83	159.39	15	Not Found	High	Not Found	High	High	High	High	Not Found	Not Found	High	High	High	High	High	High	Not Found	Not Found	High	High	High	High	High	High	High	1	0		0
High	Master Protein	G7J9V8	Chaperone ClpB, putative OS=Medicago truncatula GN=MTR_3g106160 PE=3 SV=1	0	149.957	27	21	48	15	980	109.8	6.98	187.69	21	Not Found	High	High	High	High	Not Found	Not Found	High	Not Found	Medium	High	High	High	High	High	High	Not Found	Not Found	High	High	High	High	High	High	1	0		0
High	Master Protein	Q2HRW5	Syntaxin of plants protein OS=Medicago truncatula GN=MTR_7g084590 PE=4 SV=1	0	137.075	61	15	51	15	266	29.6	6.16	239.98	15	High	High	High	High	High	Not Found	Not Found	Not Found	High	Not Found	High	High	High	High	High	High	High	Medium	High	High	High	High	High	Not Found	1	0		0
High	Master Protein	G7KS23	WPP domain interacting tail-anchored protein OS=Medicago truncatula GN=MTR_7g017690 PE=4 SV=1	0	85.578	23	15	41	15	626	70.6	4.64	144.92	15	Not Found	High	High	High	High	Not Found	High	High	High	High	High	High	High	High	High	High	Not Found	High	High	High	High	Not Found	High	Not Found	1	0		0
High	Master Protein	A0A072UN34	Protein phosphatase 2C-like protein OS=Medicago truncatula GN=MTR_4g094208 PE=4 SV=1	0	152.449	59	15	93	15	278	30.3	7.21	405.5	15	Not Found	High	High	High	High	High	High	High	Not Found	High	High	High	High	High	High	High	Not Found	High	High	High	High	High	High	High	1	0		0		Deamidated [Q189]
High	Master Protein	Q2MJ20	Cytochrome P450 family protein OS=Medicago truncatula GN=CYP716A12 PE=2 SV=1	0	85.808	33	15	70	15	479	54.7	8.72	231.45	15	Not Found	High	High	High	High	High	High	High	Not Found	Not Found	High	High	Not Found	High	High	High	Not Found	Not Found	High	High	High	High	High	High	1	0		0
High	Master Protein	G7I5W7	Protein accumulation AND replication OFs protein OS=Medicago truncatula GN=MTR_1g023310 PE=4 SV=1	0	108.097	25	15	36	15	796	87.2	5	174.49	15	Not Found	Not Found	High	High	High	Not Found	High	High	Not Found	High	High	High	Not Found	Not Found	High	High	Not Found	Not Found	Not Found	High	High	High	High	High	1	0		0
High	Master Protein	A0A072URW6	GDP-fucose protein O-fucosyltransferase OS=Medicago truncatula GN=MTR_4g008200 PE=4 SV=1	0	107.083	37	15	67	15	419	46.8	6.23	270.21	15	Not Found	High	Not Found	High	High	High	High	High	Not Found	High	High	High	High	High	High	High	Not Found	High	High	High	High	High	High	High	1	0		0
High	Master Protein	A0A072UHR4	Thylakoid membrane slr0575-like protein OS=Medicago truncatula GN=MTR_6g017260 PE=4 SV=1	0	213.204	47	15	168	15	280	30.6	7.81	743.24	15	High	High	High	High	High	High	High	High	High	High	High	High	High	High	High	High	High	High	High	High	High	High	High	High	1	2	Phospho [T64; S66]	0		Phospho [T64; S66]; Deamidated [Q67; R202; R267]
High	Master Protein	G7LF66	Heavy metal P-type ATPase OS=Medicago truncatula GN=MTR_8g012390 PE=3 SV=1	0	74.463	16	15	42	15	957	103	6.04	134.22	15	Not Found	Not Found	High	High	High	High	High	High	Not Found	Not Found	High	High	High	High	High	High	Not Found	Not Found	High	High	High	High	High	High	1	0		0		Carboxymethyl [K10]
High	Master Protein	G7JLC6	F0F1-type ATP synthase, delta subunit OS=Medicago truncatula GN=MTR_4g103330 PE=3 SV=1	0	189.384	37	15	197	15	249	27.2	9.11	911.41	15	High	High	High	High	High	High	High	High	High	High	High	High	High	High	High	High	High	High	High	High	High	High	High	High	1	1	Phospho [T203]	0		Deamidated [Q239]; Phospho [T203]
High	Master Protein	G7IL22	30S ribosomal protein S1 OS=Medicago truncatula GN=MTR_2g033020 PE=4 SV=2	0	77.856	35	15	39	15	409	44.9	5.24	136.19	15	Not Found	High	High	High	High	High	High	Not Found	Not Found	High	High	High	Not Found	High	High	Not Found	Not Found	High	High	High	High	High	High	Medium	1	0		0
High	Master Protein	A0A072VPT1	Acetyltransferase component of pyruvate dehydrogenase complex OS=Medicago truncatula GN=MTR_1g091037 PE=3 SV=1	0	118.523	30	15	57	15	633	68.2	6.77	250.61	15	High	High	High	High	High	High	Not Found	High	Not Found	Not Found	High	High	High	High	High	High	Not Found	Not Found	High	High	High	High	High	High	1	0		0
High	Master Protein	G7JNQ7	Topoisomerase-like protein OS=Medicago truncatula GN=MTR_4g104360 PE=4 SV=2	0	111.744	26	15	38	15	703	77.4	5.1	161	15	Not Found	Not Found	High	High	High	High	High	Not Found	Not Found	Not Found	High	High	High	High	Medium	Not Found	Not Found	Not Found	High	High	High	Not Found	High	Medium	1	0		0		Carboxymethyl [K50]
High	Master Protein	G7I6H0	IQ calmodulin-binding motif protein OS=Medicago truncatula GN=MTR_1g023760 PE=4 SV=1	0	109.375	24	15	41	15	784	85.8	6.34	163.3	15	High	High	High	High	Not Found	High	Not Found	High	High	High	High	High	Not Found	High	High	High	High	High	High	High	High	High	High	High	1	0		0
High	Master Protein	A0A072VDT9	Niemann-pick C1-like protein OS=Medicago truncatula GN=MTR_3g115450 PE=4 SV=1	0	57.32	12	15	47	15	1284	140.9	6.43	137.61	15	Not Found	High	Not Found	High	High	High	High	High	Not Found	Not Found	High	High	Not Found	High	High	High	Not Found	Not Found	High	High	High	High	High	High	1	0		0
High	Master Protein	G7JUE5	High chlorophyll fluorescence phenotype 173 protein OS=Medicago truncatula GN=MTR_4g005070 PE=4 SV=1	0	91.56	28	15	36	15	589	64.6	8.21	137.72	15	Not Found	High	High	High	High	High	Not Found	High	Not Found	Not Found	High	High	High	High	High	High	Not Found	High	High	High	High	Not Found	High	High	1	0		0
High	Master Protein	A0A072VRA4	50S ribosomal protein L15 OS=Medicago truncatula GN=MTR_1g110750 PE=3 SV=1	0	110.998	45	15	71	15	257	27.7	10.36	320.1	15	High	High	High	High	High	High	High	High	Not Found	High	High	High	Not Found	High	High	High	High	High	High	High	High	High	High	High	1	0		0
High	Master Protein	A0A072U6U8	Plant-specific import receptor subunit TOM20 OS=Medicago truncatula GN=MTR_6g024140 PE=4 SV=1	0	201.228	67	15	155	15	206	22.8	5.86	803.43	15	High	High	High	High	High	High	High	High	Not Found	High	High	High	High	High	High	High	High	High	High	High	High	High	High	High	1	0		0
High	Master Protein	G7IK85	Mg-protoporphyrin IX chelatase OS=Medicago truncatula GN=MTR_2g015390 PE=3 SV=1	0	77.216	39	15	41	15	422	46	5.72	136.21	15	Not Found	Not Found	High	High	High	High	High	High	Not Found	Not Found	Not Found	High	High	High	High	High	Not Found	High	Not Found	High	High	High	High	Not Found	1	0		0
High	Master Protein	A0A072UQ87	Copper-transporting ATPase PAA1, putative OS=Medicago truncatula GN=MTR_4g094232 PE=3 SV=1	0	135.029	20	15	68	15	943	100	8.32	311	15	High	High	High	High	High	Not Found	High	High	High	High	High	High	High	High	High	High	High	Not Found	High	High	High	High	High	High	1	0		0
High	Master Protein	A0A072U593	Gamma carbonic anhydrase-like protein OS=Medicago truncatula GN=MTR_8g096820 PE=4 SV=1	0	136.87	38	15	168	15	253	27.8	7.56	716.92	15	High	High	High	High	High	High	High	High	High	High	High	High	High	High	High	High	High	High	High	High	High	High	High	High	1	0		0
High	Master Protein	A0A072U2B7	Transducin/WD40 repeat protein OS=Medicago truncatula GN=MTR_7g088540 PE=4 SV=1	0	68.47	37	15	31	15	453	49.7	6.37	106.5	15	High	Not Found	High	High	Not Found	High	High	High	Not Found	Not Found	High	High	High	High	High	High	Not Found	Not Found	High	High	High	Medium	High	High	1	0		0		Deamidated [Q32]
High	Master Protein	G7KG90	Stress-inducible protein, putative OS=Medicago truncatula GN=MTR_5g012030 PE=4 SV=1	0	139.058	33	15	43	15	581	65.3	5.94	205.96	15	Not Found	High	High	High	High	High	High	Not Found	Not Found	High	High	High	High	Not Found	Not Found	Not Found	Not Found	High	High	High	High	High	Not Found	Not Found	1	0		0
High	Master Protein	G7LGI5	Respiratory burst oxidase-like protein D OS=Medicago truncatula GN=MTR_8g095520 PE=4 SV=1	0	112.209	19	19	67	15	898	101.8	8.4	215.19	19	Not Found	Not Found	High	High	High	High	High	High	Not Found	Not Found	High	High	High	High	Not Found	High	Not Found	High	High	Not Found	High	High	High	High	1	3	Phospho [S92; S113; S128]	0		Phospho [S92; S113; S128]
High	Master Protein	A0A072VR00	D-3-phosphoglycerate dehydrogenase OS=Medicago truncatula GN=MTR_1g107480 PE=3 SV=1	0	78.73	24	15	34	15	597	62.9	6.34	132.98	15	High	High	High	High	High	Not Found	High	Not Found	High	High	High	High	Not Found	High	High	High	High	High	High	High	High	High	High	Not Found	1	0		0
High	Master Protein	G7KZK3	CLIP-associating-like protein OS=Medicago truncatula GN=MTR_7g099480 PE=4 SV=2	0	90.234	14	15	24	15	1436	158.3	7.27	92.63	15	Not Found	Medium	High	Not Found	High	Not Found	Not Found	High	Not Found	Medium	High	Not Found	Not Found	High	Not Found	High	Not Found	Medium	High	High	Not Found	High	High	High	1	0		0		Deamidated [Q657]
High	Master Protein	A0A072VAY5	Adaptor protein complex AP-2, alpha subunit OS=Medicago truncatula GN=MTR_2g084610 PE=4 SV=1	0	99.544	15	15	27	15	1026	114.4	6.3	110.89	15	High	High	High	Not Found	Not Found	Not Found	High	Not Found	Not Found	High	High	Not Found	Not Found	High	Medium	High	High	High	Not Found	Not Found	High	High	High	Medium	1	0		0
High	Master Protein	A0A072UV82	LRR and NB-ARC domain disease resistance protein OS=Medicago truncatula GN=MTR_3g435040 PE=3 SV=1	0	108.386	13	15	23	15	1618	184.3	5.58	88.23	15	High	High	High	High	High	High	High	High	Not Found	High	Not Found	High	Not Found	High	Not Found	Not Found	Not Found	High	High	High	Not Found	Not Found	High	Not Found	1	0		0
High	Master Protein	G7K882	Phosphoribulokinase OS=Medicago truncatula GN=MTR_5g027530 PE=3 SV=1	0	130.453	44	15	77	15	411	45.7	7.12	308.9	15	High	High	High	High	High	High	High	High	High	High	High	High	High	Not Found	High	High	High	High	High	High	High	High	High	High	1	0		0		Deamidated [Q383]
High	Master Protein	A0A072UCM6	Glutamate decarboxylase OS=Medicago truncatula GN=MTR_6g075210 PE=3 SV=1	0	128.102	32	18	53	15	499	56.1	5.91	193.52	18	Not Found	High	High	High	High	High	High	High	Not Found	High	High	High	Not Found	High	High	High	Not Found	High	High	Not Found	High	High	High	High	1	0		0
High	Master Protein	A0A072VDW0	Calcium-binding EF hand protein OS=Medicago truncatula GN=MTR_3g115640 PE=4 SV=1	0	55.14	11	15	27	14	1180	128.5	5.26	85.61	15	Not Found	Not Found	High	High	High	Not Found	High	Not Found	Not Found	Not Found	High	High	Not Found	High	High	Not Found	Not Found	Not Found	High	High	High	High	High	Not Found	1	0		0
High	Master Protein	A0A072UA79	Unusual kinase, putative OS=Medicago truncatula GN=MTR_6g038750 PE=4 SV=1	0	104.983	24	14	54	14	710	79.3	7.27	203.15	14	Not Found	High	High	High	High	High	High	High	Not Found	High	High	High	High	High	High	High	Not Found	High	High	High	High	High	High	High	1	0		0
High	Master Protein	G7KFV7	Isocitrate dehydrogenase [NADP] OS=Medicago truncatula GN=MTR_5g077070 PE=3 SV=1	0	182.878	43	19	103	14	412	46	6.39	439.65	19	Not Found	Not Found	High	High	High	High	High	High	Not Found	Not Found	High	High	High	High	High	High	Not Found	Not Found	High	High	High	High	High	High	1	0		0
High	Master Protein	G7KES5	FAM63A-like protein, putative OS=Medicago truncatula GN=MTR_5g011090 PE=4 SV=1	0	71.639	24	14	28	14	737	81	4.53	102.88	14	Not Found	High	Not Found	High	High	High	High	Not Found	Not Found	High	High	Not Found	High	Not Found	High	Not Found	Not Found	High	High	High	High	High	High	Not Found	1	1	Phospho [S723]	0		Deamidated [Q125; Q126]; Phospho [S723]
High	Master Protein	A0A072TMG8	Grave disease carrier protein OS=Medicago truncatula GN=MTR_8g027975 PE=3 SV=1	0	83.021	46	17	89	14	361	39	9.45	246.36	17	High	High	High	High	High	High	High	High	Not Found	Not Found	High	High	High	High	High	High	High	High	High	High	High	High	High	High	1	0		0
High	Master Protein	G8A207	Carboxy-terminal region remorin OS=Medicago truncatula GN=MTR_1g100647 PE=2 SV=1	0	169.111	51	15	94	14	209	23.1	8.12	460.12	15	High	High	High	High	High	High	High	High	Not Found	High	High	High	High	High	High	High	Medium	High	High	High	High	High	High	High	1	0		0
High	Master Protein	G7KJE1	Cytochrome P450 family 82 protein OS=Medicago truncatula GN=MTR_6g008500 PE=3 SV=1	0	108.987	28	14	49	14	541	61.6	7.74	207.73	14	Not Found	High	High	High	High	Not Found	High	High	Not Found	Not Found	High	Not Found	High	High	High	High	Not Found	Not Found	High	High	Not Found	High	High	High	1	0		0
High	Master Protein	G7IQ41	C2 and GRAM domain plant-like protein OS=Medicago truncatula GN=MTR_2g027360 PE=4 SV=2	0	49.638	14	14	32	14	1023	114.9	6.07	100.5	14	High	Not Found	High	High	Not Found	High	High	High	High	Not Found	High	High	High	High	High	High	Not Found	High	High	High	High	High	High	High	1	0		0
High	Master Protein	A0A072VCX2	Aspartate aminotransferase OS=Medicago truncatula GN=MTR_3g110065 PE=4 SV=1	0	117.159	36	15	43	14	458	50.2	8.44	177.55	15	Not Found	Not Found	High	High	High	High	High	High	Not Found	Not Found	High	High	Not Found	High	High	High	Not Found	Not Found	High	High	High	High	High	High	1	0		0
High	Master Protein	A0A072UIL2	NAD(P)H dehydrogenase B2 OS=Medicago truncatula GN=MTR_4g045997 PE=4 SV=1	0	71.649	27	15	55	14	550	61.3	5.54	185.09	15	Not Found	High	High	High	High	High	High	High	Not Found	High	High	High	High	High	High	High	High	High	High	Not Found	High	High	High	High	1	0		0		Deamidated [Q83; R88]
High	Master Protein	G7JNZ5	Mevalonate/galactokinase family protein OS=Medicago truncatula GN=MTR_4g122670 PE=4 SV=1	0	110.09	35	14	32	14	497	54.6	6.1	137.43	14	Not Found	High	High	Not Found	High	Not Found	High	High	Not Found	High	High	High	Not Found	Not Found	High	High	Not Found	High	High	High	Medium	Not Found	High	High	1	0		0
High	Master Protein	G7JC39	Methyltransferase PMT26-like protein, putative OS=Medicago truncatula GN=MTR_3g096480 PE=4 SV=1	0	150.179	29	18	67	14	789	88.9	5.19	296.79	18	High	High	High	High	High	High	High	High	High	High	Not Found	High	High	High	High	High	High	High	Not Found	Not Found	High	High	High	High	1	0		0		Deamidated [Q419; Q633]
High	Master Protein	A0A072VW87	UDP-glucuronic acid decarboxylase OS=Medicago truncatula GN=MTR_1g067530 PE=4 SV=1	0	88.781	33	16	50	14	460	51.5	8.56	178.57	16	Not Found	High	Not Found	High	High	High	High	High	Not Found	High	Medium	High	Not Found	High	Not Found	High	Not Found	High	High	High	High	High	High	High	1	0		0		Deamidated [Q340]
High	Master Protein	G7JGN9	Signal recognition particle receptor protein, putative OS=Medicago truncatula GN=MTR_4g130770 PE=4 SV=1	0	49.475	20	14	33	14	631	69.4	7.94	98.75	14	Not Found	High	Not Found	High	High	High	Not Found	High	Not Found	High	High	High	High	High	High	Not Found	High	High	High	Not Found	High	High	High	Not Found	1	0		0		Deamidated [R192]
High	Master Protein	A0A072UC92	White-brown-complex ABC transporter family protein, putative OS=Medicago truncatula GN=MTR_6g066240 PE=4 SV=1	0	122.603	15	14	67	14	697	77.8	8.4	269.14	14	High	High	High	High	High	High	High	High	Not Found	High	High	High	High	High	High	High	Not Found	High	High	High	High	High	High	High	1	2	Phospho [S684; S686]	0		Deamidated [R116]; Phospho [S684; S686]
High	Master Protein	G7J6C8	Inner membrane import protein Tic22, putative OS=Medicago truncatula GN=MTR_3g101630 PE=4 SV=1	0	87.941	58	14	68	14	252	28.3	9.22	216.74	14	High	High	High	High	High	High	High	High	High	Not Found	High	High	Medium	High	High	High	High	High	High	High	High	High	High	High	1	0		0		Deamidated [Q167]
High	Master Protein	A0A072UAL5	Ketose-bisphosphate aldolase class-II family protein OS=Medicago truncatula GN=MTR_6g069685 PE=4 SV=1	0	117.204	22	14	55	14	747	80.7	6.47	205.53	14	Not Found	High	High	High	High	High	High	High	Not Found	High	High	High	High	High	High	High	Not Found	High	Not Found	High	High	High	High	Not Found	1	0		0
High	Master Protein	G7LHC7	TPR domain kinase OS=Medicago truncatula GN=MTR_8g098370 PE=4 SV=2	0	205.773	42	19	181	14	489	54.6	5.58	809.66	19	High	High	High	High	High	High	High	High	High	Not Found	High	High	High	High	High	High	Not Found	High	High	High	High	High	High	High	1	0		0
High	Master Protein	A0A072TZJ4	RPM1 interacting protein 4 transcript protein OS=Medicago truncatula GN=MTR_7g056147 PE=4 SV=1	0	158.019	73	14	91	14	249	27.6	8.25	387.96	14	High	High	High	High	High	High	High	High	High	High	High	High	High	High	High	High	High	High	High	High	High	High	Not Found	Not Found	1	5	Phospho [S101; S134; S147; T162; T222]	0		Phospho [S101; S134; S147; T162; T222]
High	Master Protein	G7KE92	Cytochrome P450 family 71 protein OS=Medicago truncatula GN=MTR_5g070920 PE=3 SV=1	0	86.251	29	16	37	14	510	57.9	8.38	139.69	16	High	High	Medium	High	High	High	Not Found	High	Not Found	Not Found	Not Found	High	High	High	High	High	High	High	Medium	High	High	High	High	High	1	0		0
High	Master Protein	G7L8A8	Fluorescent IN BLUE LIGHT protein OS=Medicago truncatula GN=MTR_8g022040 PE=4 SV=1	0	132.798	33	14	116	14	300	33.4	8.7	508.27	14	Not Found	High	High	High	High	High	High	High	Not Found	High	High	High	High	High	High	High	High	High	High	High	High	High	High	High	1	0		0		Deamidated [Q145]
High	Master Protein	G7JGV7	Glycerol kinase-like protein OS=Medicago truncatula GN=MTR_4g009920 PE=4 SV=1	0	59.692	29	14	33	14	519	56.1	6.8	96.42	14	Not Found	Not Found	High	High	High	High	High	Medium	Not Found	Not Found	High	High	High	High	High	Not Found	Not Found	Not Found	High	High	High	High	High	High	1	0		0
High	Master Protein	G7LD87	Plastid movement impaired protein OS=Medicago truncatula GN=MTR_8g106680 PE=4 SV=2	0	104.394	22	14	32	14	871	96.3	5.44	154.79	14	Not Found	Not Found	High	High	High	High	High	Not Found	Not Found	High	High	High	High	High	High	Not Found	Not Found	Not Found	High	High	High	High	High	High	1	0		0
High	Master Protein	G7JLW6	Defective in exine formation protein OS=Medicago truncatula GN=MTR_4g014960 PE=4 SV=2	0	133.293	22	14	48	14	873	97.2	4.88	234.17	14	Not Found	High	High	High	High	High	High	High	Not Found	Not Found	High	High	High	High	High	High	Not Found	High	Not Found	High	Not Found	High	High	High	1	0		0		Deamidated [Q69]
High	Master Protein	G7K8P7	Trigger factor-like protein OS=Medicago truncatula GN=MTR_5g093830 PE=3 SV=1	0	79.618	28	14	35	14	561	63.2	5.2	139.1	14	Not Found	High	High	High	High	High	High	High	Not Found	High	High	High	High	High	High	Not Found	Not Found	High	High	High	High	High	High	High	1	0		0
High	Master Protein	G8A0X6	Cysteine-rich receptor-kinase-like protein OS=Medicago truncatula GN=MTR_1g105650 PE=4 SV=1	0	103.699	23	15	65	14	661	73.1	6.68	264.93	15	Not Found	High	Not Found	High	High	High	High	High	Not Found	Not Found	High	High	High	High	High	High	Not Found	High	High	High	High	High	High	High	1	0		0
High	Master Protein	G7II85	Molecular chaperone Hsp40/DnaJ family protein OS=Medicago truncatula GN=MTR_2g104030 PE=3 SV=1	0	114.848	25	14	50	14	496	53.4	8.48	222.09	14	Not Found	High	High	High	High	High	High	High	High	Not Found	High	High	High	High	High	High	Not Found	Not Found	High	High	High	High	High	High	1	0		0
High	Master Protein	G8A0W8	Cysteine-rich receptor-kinase-like protein OS=Medicago truncatula GN=MTR_1g105700 PE=4 SV=1	0	132.447	27	18	60	14	693	77.5	5.88	217.78	18	High	Not Found	High	High	High	High	High	High	Not Found	High	High	High	High	High	High	Not Found	High	High	High	High	High	High	High	High	1	1	Phospho [S658]	0		Phospho [S658]; Deamidated [Q399]
High	Master Protein	G7KFY5	LRR receptor-like kinase OS=Medicago truncatula GN=MTR_5g077430 PE=3 SV=1	0	104.593	20	17	62	14	945	102.8	6.65	225.28	17	Not Found	High	High	Not Found	High	High	High	High	Not Found	Not Found	High	High	High	High	High	High	Not Found	High	High	High	Not Found	High	High	High	1	0		0		Deamidated [Q222]
High	Master Protein	G7KFF1	Niemann-pick C1-like protein OS=Medicago truncatula GN=MTR_5g099070 PE=4 SV=2	0	167.276	13	14	112	14	1340	147.1	5.25	529.04	14	Not Found	High	High	High	High	High	High	High	Not Found	Not Found	High	High	High	High	High	High	Not Found	Not Found	High	High	High	High	High	High	1	0		0
High	Master Protein	G7KSR8	DnaJ heat shock family protein OS=Medicago truncatula GN=MTR_7g109340 PE=2 SV=1	0	138.085	34	14	74	14	344	38.7	6.8	314.42	14	Not Found	High	High	High	High	High	High	High	Not Found	High	High	High	High	High	High	High	High	High	High	High	High	Not Found	High	High	1	0		0
High	Master Protein	G7KW49	Esterase/lipase/thioesterase family protein OS=Medicago truncatula GN=MTR_7g083130 PE=4 SV=1	0	90.063	24	14	39	14	671	75	7.55	156.93	14	Not Found	High	Not Found	High	High	High	High	High	Not Found	Not Found	High	High	High	High	High	High	Not Found	Not Found	Not Found	High	High	High	High	High	1	0		0		Deamidated [Q582]
High	Master Protein	Q1RU62	Histone H4 OS=Medicago truncatula GN=MTR_2g096100 PE=2 SV=1	0	91.841	61	14	73	14	103	11.4	11.47	301.54	14	Not Found	High	High	High	High	High	High	High	Not Found	High	Not Found	High	High	High	High	High	Not Found	High	Not Found	High	High	High	High	High	1	0		0
High	Master Protein	G7K1K2	Alpha/beta-hydrolase superfamily protein OS=Medicago truncatula GN=MTR_5g056550 PE=4 SV=1	0	103.972	33	14	87	14	395	44.7	8.31	364.59	14	Not Found	High	High	High	High	High	High	High	Not Found	Not Found	Not Found	High	High	High	High	High	Not Found	High	High	High	High	High	High	High	1	0		0
High	Master Protein	G7LJM3	Peptidase M16 inactive domain protein OS=Medicago truncatula GN=MTR_8g101950 PE=3 SV=2	0	96.271	17	15	52	14	978	109.3	6.15	213.17	15	Not Found	High	Not Found	High	High	High	High	High	Not Found	Not Found	Not Found	Not Found	High	High	High	High	Not Found	Not Found	Not Found	Not Found	High	High	High	High	1	0		0
High	Master Protein	A0A072W016	UDP-glucose:sterol glucosyltransferase OS=Medicago truncatula GN=MTR_1g098640 PE=4 SV=1	0	96.7	23	14	57	14	618	68.7	6.14	193.89	14	Not Found	Not Found	High	High	High	High	High	High	Not Found	Not Found	High	High	High	High	High	High	Not Found	High	High	High	High	High	High	High	1	0		0
High	Master Protein	G7L1T5	O-linked GlcNAc transferase-like protein OS=Medicago truncatula GN=MTR_7g114810 PE=4 SV=1	0	108.992	37	14	46	14	302	33.8	8.34	225.16	14	Not Found	High	High	High	High	High	High	High	Not Found	High	High	Not Found	High	High	High	High	Not Found	High	High	Not Found	High	High	High	High	1	0		0
High	Master Protein	G7KE15	Calcium ion-binding protein OS=Medicago truncatula GN=MTR_5g069410 PE=4 SV=1	0	72.878	24	14	52	14	566	64.6	5.34	185.22	14	Not Found	Not Found	Not Found	Not Found	High	High	High	High	Not Found	Not Found	Not Found	Not Found	High	High	High	High	Not Found	Not Found	Medium	Not Found	High	High	High	High	1	0		0
High	Master Protein	B7FGP5	Adenine nucleotide alpha hydrolase superfamily protein OS=Medicago truncatula GN=MTR_4g019800 PE=2 SV=1	0	87.253	64	15	56	14	165	18.4	6.05	199.1	15	Not Found	High	High	High	High	High	High	Not Found	Not Found	High	Not Found	High	High	High	High	High	Not Found	Not Found	Not Found	High	High	High	High	High	1	0		0
High	Master Protein	G7J2L7	TCP-1/cpn60 chaperonin family protein OS=Medicago truncatula GN=MTR_3g086330 PE=2 SV=1	0	43.919	20	14	33	14	535	59.2	5.66	87.24	14	Not Found	High	High	High	High	High	High	Not Found	High	Not Found	Not Found	High	Medium	High	Not Found	High	High	High	High	High	High	High	High	High	1	0		0
High	Master Protein	G7KEN0	Nup133/Nup155-like nucleoporin OS=Medicago truncatula GN=MTR_5g097260 PE=4 SV=1	0	70.26	14	14	28	14	1308	147.2	5.74	96.96	14	Not Found	High	Not Found	High	High	High	High	High	Not Found	High	High	Not Found	High	High	Not Found	High	Not Found	High	Not Found	High	Not Found	Not Found	High	High	1	0		0
High	Master Protein	A0A072TSZ4	Signal recognition particle subunit SRP72 OS=Medicago truncatula GN=MTR_8g079990 PE=3 SV=1	0	113.132	24	14	34	14	668	74	9.17	139.76	14	Not Found	High	High	High	High	High	Not Found	High	Not Found	High	High	High	High	High	High	Not Found	Not Found	High	Not Found	High	High	High	High	Not Found	1	0		0
High	Master Protein	A0A072UYE3	SEC12p-like protein OS=Medicago truncatula GN=MTR_4g084650 PE=4 SV=1	0	93.698	41	14	51	14	375	40.6	5.81	197.27	14	High	Not Found	High	High	High	High	High	High	Not Found	High	High	Not Found	High	High	High	High	High	High	High	High	High	High	High	High	1	0		0
High	Master Protein	A0A072UDP2	Legumin A2 OS=Medicago truncatula GN=MTR_7g096990 PE=4 SV=1	0	280.046	49	25	255	14	525	60.4	6.96	1063.24	25	High	High	High	High	High	High	High	High	High	High	High	High	High	High	High	High	High	High	High	High	High	High	High	High	1	0		0		Deamidated [Q224; Q235; Q249; Q286; Q367; Q446]
High	Master Protein	G7K7K0	LysM-domain receptor-like kinase OS=Medicago truncatula GN=MTR_5g085790 PE=4 SV=2	0	120.524	25	14	48	14	660	73.3	6.79	210.26	14	Not Found	High	High	High	High	High	High	High	Not Found	High	Not Found	High	High	High	High	High	Not Found	High	High	High	High	High	High	High	1	0		0
High	Master Protein	G7LCC0	26S proteasome regulatory complex component OS=Medicago truncatula GN=MTR_8g106120 PE=4 SV=1	0	89.925	13	14	41	14	1001	108.7	5.29	157.38	14	High	High	High	High	High	Not Found	High	High	Not Found	High	High	High	Not Found	Not Found	High	High	High	High	High	High	High	Not Found	Not Found	High	1	0		0
High	Master Protein	G7LBF4	Dynamin-like protein 1E OS=Medicago truncatula GN=MTR_8g105580 PE=3 SV=1	0	139.888	35	22	62	14	616	69	8.03	241.45	22	Not Found	High	High	Not Found	High	High	Not Found	High	Not Found	Not Found	High	Not Found	Not Found	High	High	High	Not Found	High	High	High	High	Not Found	High	High	1	0		0		Deamidated [Q84]
High	Master Protein	A0A072UYZ3	AAA family ATPase OS=Medicago truncatula GN=MTR_4g088885 PE=4 SV=1	0	104.164	23	14	46	14	752	82.7	6.13	193.09	14	Not Found	High	High	High	High	High	High	High	Not Found	High	High	High	High	High	High	High	Not Found	High	High	High	High	High	High	High	1	0		0
High	Master Protein	A0A072UHK5	alpha-1,2-Mannosidase OS=Medicago truncatula GN=MTR_4g008140 PE=3 SV=1	0	94.42	25	14	43	14	577	65.2	6.49	176.87	14	Not Found	High	High	High	High	High	High	High	Not Found	High	High	High	High	High	High	High	Not Found	High	High	High	High	High	High	High	1	0		0
High	Master Protein	G7KN51	40S ribosomal S7-like protein OS=Medicago truncatula GN=MTR_6g021670 PE=2 SV=1	0	88.875	57	14	92	14	191	21.9	9.89	326.45	14	Not Found	High	High	High	High	High	High	High	Not Found	High	High	High	High	High	High	High	High	Not Found	High	High	High	High	High	High	1	0		0
High	Master Protein	G7KC55	Transmembrane protein, putative OS=Medicago truncatula GN=MTR_5g019500 PE=4 SV=2	0	97.712	15	14	63	14	939	107.5	6.81	261.5	14	Not Found	High	High	High	High	High	High	High	Not Found	High	High	High	High	High	High	High	Not Found	High	High	High	High	High	High	High	1	0		0
High	Master Protein	B7FIZ2	NADH-ubiquinone oxidoreductase 39 kDa subunit OS=Medicago truncatula GN=MTR_1g069455 PE=2 SV=1	0	111.431	28	14	78	14	396	43.8	9.33	263.19	14	Not Found	High	High	High	High	High	High	High	High	High	High	High	High	High	High	High	Not Found	High	High	High	High	High	High	High	1	0		0		Carboxymethyl [K212]
High	Master Protein	A0A072TX52	1-deoxy-D-xylulose 5-phosphate reductoisomerase OS=Medicago truncatula GN=MTR_8g012565 PE=3 SV=1	0	141.644	37	15	73	14	470	51.1	6.76	324.08	15	Not Found	High	Not Found	High	High	High	High	High	Not Found	Not Found	High	High	Not Found	High	High	High	Not Found	High	High	High	High	High	High	High	1	0		0
High	Master Protein	G7L7U1	AP-4 complex subunit epsilon OS=Medicago truncatula GN=MTR_8g072250 PE=4 SV=2	0	74.426	19	14	27	14	978	106.6	5.97	80.31	14	Not Found	Not Found	High	High	High	Not Found	Not Found	Not Found	Not Found	Not Found	High	High	High	High	Not Found	High	Not Found	High	Not Found	High	High	High	High	Not Found	1	0		0
High	Master Protein	A0A072UBH0	Linker histone H1 and h5 family protein OS=Medicago truncatula GN=MTR_6g079520 PE=4 SV=1	0	153.396	28	14	68	14	553	59.6	10.65	335.94	14	Not Found	High	High	High	High	High	High	High	Not Found	High	High	Not Found	Not Found	High	High	High	High	High	High	High	High	High	High	High	1	0		0
High	Master Protein	B7FH64	40S ribosomal S3-like protein OS=Medicago truncatula GN=MTR_1g044660 PE=2 SV=1	0	88.125	44	14	113	14	239	26.6	9.64	392.61	14	High	High	High	Not Found	High	High	High	High	High	High	High	High	High	High	High	High	High	High	High	High	High	High	High	High	1	0		0
High	Master Protein	A0A072TKA0	Alpha/beta fold hydrolase OS=Medicago truncatula GN=MTR_0004s0330 PE=4 SV=1	0	96.408	27	14	71	14	433	47.5	8.03	302.38	14	Medium	High	High	High	High	High	High	Not Found	Not Found	High	High	High	High	High	High	High	High	High	High	High	High	High	High	High	1	0		0
High	Master Protein	A0A072UX32	Aldo/keto reductase family oxidoreductase OS=Medicago truncatula GN=MTR_3g449790 PE=4 SV=1	0	81.796	42	14	44	14	366	40.2	8.91	141.43	14	Not Found	High	High	High	High	High	High	High	Not Found	High	High	High	High	High	High	High	High	High	Not Found	High	High	High	High	High	1	0		0
High	Master Protein	G7JK09	Polyadenylate-binding protein OS=Medicago truncatula GN=MTR_4g085540 PE=3 SV=1	0	95.341	28	16	39	14	654	71	8.25	153.58	16	High	High	Not Found	High	High	High	Not Found	High	Not Found	Not Found	Not Found	High	High	High	High	High	High	Not Found	Not Found	High	High	Not Found	Not Found	High	1	0		0
High	Master Protein	G7I2L5	Peptidoglycan-binding domain protein OS=Medicago truncatula GN=MTR_1g072690 PE=4 SV=1	0	112.149	46	14	45	14	392	44.4	5.07	148.49	14	High	High	High	High	High	High	High	Medium	Not Found	High	High	High	High	High	High	High	High	High	High	High	High	High	Not Found	Not Found	1	0		0
High	Master Protein	G7KK02	LRR receptor-like kinase OS=Medicago truncatula GN=MTR_6g009370 PE=4 SV=1	0	119.089	25	14	101	14	602	66.6	6.74	404.93	14	Not Found	High	High	High	High	High	High	High	Not Found	Not Found	High	High	High	High	High	High	High	High	High	High	High	High	High	High	1	0		0
High	Master Protein	A0A072TLT0	Transmembrane 9 superfamily member OS=Medicago truncatula GN=MTR_8g016270 PE=3 SV=1	0	107.106	20	15	100	14	648	74.5	8.18	391.67	15	High	High	High	High	High	High	High	High	High	High	High	High	High	High	High	High	High	Not Found	High	High	High	High	High	High	1	0		0		Deamidated [R190]
High	Master Protein	G7LJ51	Cytochrome P450 family 72 protein OS=Medicago truncatula GN=MTR_8g042000 PE=3 SV=1	0	97.265	28	16	59	14	524	59.3	8.57	229.62	16	Not Found	Not Found	High	High	High	High	High	High	Not Found	Not Found	High	High	High	High	High	Not Found	Not Found	High	Not Found	High	High	High	High	High	1	0		0		Deamidated [Q302]
High	Master Protein	A0A072UFI4	TPR domain protein OS=Medicago truncatula GN=MTR_4g005300 PE=4 SV=1	0	99.415	38	14	55	14	388	42.2	6.24	229.81	14	Not Found	Not Found	Not Found	High	High	High	High	Not Found	Not Found	High	High	High	High	High	High	High	High	High	High	High	High	High	High	High	1	0		0
High	Master Protein	G7IAE3	Glutamyl-tRNA synthetase OS=Medicago truncatula GN=MTR_1g085150 PE=3 SV=1	0	59.945	19	14	29	14	735	82.9	8.32	94.97	14	Not Found	High	High	High	High	High	High	High	Not Found	Not Found	High	High	High	Not Found	Not Found	High	High	High	High	High	High	High	Not Found	High	1	0		0
High	Master Protein	A0A072TUS4	Heat shock 70 kDa protein OS=Medicago truncatula GN=MTR_8g099795 PE=3 SV=1	0	491.987	58	55	413	14	668	73.7	5.19	1630.27	55	High	High	High	Not Found	Not Found	High	High	High	High	High	High	Not Found	Not Found	High	High	High	High	Not Found	High	Medium	Not Found	High	High	High	1	0		0		Deamidated [Q65; Q362; Q544; R549; R552]
High	Master Protein	G7KK18	p-loop nucleoside triphosphate hydrolase superfamily protein OS=Medicago truncatula GN=MTR_6g009540 PE=3 SV=2	0	127.949	34	19	80	14	518	60.5	8.02	310.72	19	High	High	Not Found	High	High	High	High	High	High	High	High	Not Found	Not Found	High	High	High	High	High	High	Not Found	Not Found	High	High	High	1	0		0
High	Master Protein	A0A072UM25	Argonaute protein 1A OS=Medicago truncatula GN=MTR_6g477980 PE=3 SV=1	0	75.438	14	15	40	14	1115	122.7	9.23	133.5	15	Not Found	Not Found	High	High	High	High	High	High	Not Found	Not Found	High	High	High	High	High	High	Not Found	Not Found	Not Found	High	High	High	High	High	1	0		0
High	Master Protein	A0A072UKB3	Fission ELM1 protein OS=Medicago truncatula GN=MTR_4g052540 PE=4 SV=1	0	102.932	45	14	34	14	425	47.1	9.2	130.98	14	Not Found	High	High	High	High	High	Not Found	Not Found	Not Found	High	Not Found	High	Not Found	High	High	High	Not Found	High	Not Found	High	Not Found	High	High	High	1	0		0		Deamidated [Q204]
High	Master Protein	G7J8E5	DnaJ heat shock amino-terminal domain protein, putative OS=Medicago truncatula GN=MTR_3g104980 PE=4 SV=1	0	187.497	43	14	137	14	211	23.4	4.7	647.16	14	Not Found	High	High	High	High	High	High	High	Not Found	High	High	High	High	High	High	High	High	High	High	High	High	High	High	High	1	0		0		Deamidated [R133]
High	Master Protein	G7KEZ8	Gamma carbonic anhydrase-like protein OS=Medicago truncatula GN=MTR_5g020850 PE=4 SV=1	0	220.314	60	15	128	13	270	29.2	6.54	894.29	15	Not Found	High	High	High	High	High	High	High	Not Found	High	High	High	High	High	High	High	High	High	High	High	High	High	High	High	1	0		0		Deamidated [R237]; Carboxymethyl [K191]
High	Master Protein	A0A072VJR8	60S ribosomal L4-like protein OS=Medicago truncatula GN=MTR_1g066990 PE=4 SV=1	0	371.728	63	37	401	13	405	44.6	10.37	1614.83	37	High	High	High	High	High	High	High	High	High	High	High	High	High	High	High	High	High	High	High	High	High	High	High	High	1	0		0		Deamidated [R37; R147; Q304]
High	Master Protein	G7K2W1	TCP-1/cpn60 chaperonin family protein OS=Medicago truncatula GN=MTR_5g087560 PE=3 SV=1	0	61.008	25	13	40	13	561	60.2	6.39	120.85	13	Not Found	High	High	High	High	High	High	High	Not Found	High	Not Found	High	High	High	High	High	Not Found	High	Medium	High	High	High	Not Found	High	1	0		0
High	Master Protein	G7JCK0	Ketol-acid reductoisomerase OS=Medicago truncatula GN=MTR_4g079780 PE=3 SV=1	0	93.38	24	13	51	13	580	62.9	6.76	214.73	13	Not Found	High	High	High	High	High	High	High	Not Found	Not Found	Medium	High	Not Found	High	High	High	Not Found	Not Found	High	High	High	Not Found	High	High	1	0		0
High	Master Protein	G7JEG6	Low PSII accumulation protein OS=Medicago truncatula GN=MTR_4g007190 PE=4 SV=2	0	88.572	41	13	37	13	379	42.5	5.54	167.27	13	Not Found	High	High	Not Found	High	High	High	High	Not Found	Medium	High	Not Found	High	High	High	High	Not Found	Medium	Not Found	High	Not Found	High	High	High	1	0		0		Deamidated [R187]
High	Master Protein	D7RIC7	Alpha-L-arabinofuranosidase OS=Medicago truncatula GN=Araf1 PE=2 SV=1	0	64.464	22	13	44	13	672	74	5.52	142.73	13	Not Found	Not Found	Not Found	High	High	High	High	High	Not Found	High	Not Found	High	High	High	High	High	Not Found	High	High	Not Found	High	High	High	High	1	0		0
High	Master Protein	G7JV64	Phototropic-responsive NPH3 family protein OS=Medicago truncatula GN=MTR_4g093850 PE=3 SV=1	0	53.89	19	13	25	13	669	75.5	7.71	76.61	13	High	High	High	Not Found	High	Not Found	Not Found	Not Found	High	High	High	High	High	High	Not Found	Not Found	High	Not Found	High	Not Found	High	High	Not Found	High	1	0		0
High	Master Protein	G7LAU3	Spotted leaf protein, putative OS=Medicago truncatula GN=MTR_8g027140 PE=4 SV=2	0	44.629	13	14	37	13	1006	112	5.83	117.49	14	High	High	High	Not Found	Not Found	High	High	High	High	High	High	Not Found	Not Found	High	High	High	High	High	High	High	Not Found	High	High	High	1	0		0
High	Master Protein	A0A072VEW1	Auxin efflux carrier component OS=Medicago truncatula GN=MTR_1g030890 PE=3 SV=1	0	152.945	33	13	57	13	523	58	7.58	282.67	13	High	High	High	High	High	High	High	High	High	Not Found	High	High	High	High	High	High	High	Not Found	High	High	High	High	High	High	1	2	Phospho [S290; T435]	0		Phospho [S290; T435]
High	Master Protein	A0A072VQ51	TPR protein OS=Medicago truncatula GN=MTR_1g096230 PE=4 SV=1	0	61.859	29	13	41	13	336	37.7	9.09	144.24	13	Not Found	Not Found	High	High	High	High	High	High	High	Not Found	High	High	High	High	High	High	Not Found	Not Found	High	High	High	High	High	High	1	0		0
High	Master Protein	B7FJN7	Cystathionine beta-synthase (CBS) family protein OS=Medicago truncatula GN=MTR_5g076080 PE=2 SV=1	0	84.846	53	13	62	13	205	22.6	9.17	235.8	13	Not Found	High	Not Found	High	High	High	High	High	Not Found	Not Found	Not Found	High	High	High	High	High	Not Found	Not Found	Not Found	High	High	High	Not Found	Medium	1	0		0
High	Master Protein	G7KQL9	ABC-type cobalt transport system, ATPase component OS=Medicago truncatula GN=MTR_7g079540 PE=4 SV=1	0	116.253	41	13	58	13	346	38.1	8.22	252.17	13	Not Found	High	High	High	High	High	High	High	Not Found	High	High	High	High	High	High	High	Not Found	High	High	High	High	High	High	High	1	0		0		Deamidated [Q62]
High	Master Protein	G7I6X1	Zeta-carotene desaturase OS=Medicago truncatula GN=MTR_1g081290 PE=3 SV=2	0	52.096	24	13	35	13	579	64.1	7.81	107.58	13	Not Found	High	High	High	High	High	High	High	Medium	High	High	High	High	High	High	High	Not Found	Not Found	High	High	High	High	High	High	1	0		0
High	Master Protein	A0A072V1D7	Calmodulin-domain kinase CDPK protein OS=Medicago truncatula GN=MTR_4g107490 PE=4 SV=1	0	117.155	27	16	88	13	555	63	6.81	371.49	16	High	High	High	High	High	High	High	High	Not Found	High	High	High	High	High	High	High	Not Found	High	High	High	High	High	Not Found	High	1	0		0
High	Master Protein	A0A072ULA4	Centromere/microtubule-binding protein OS=Medicago truncatula GN=MTR_4g074160 PE=4 SV=1	0	123.885	33	13	26	13	612	68.2	9.28	116.76	13	High	High	High	Not Found	High	High	High	High	High	Not Found	Not Found	High	High	Medium	Not Found	Not Found	High	Not Found	Not Found	Medium	Not Found	High	Not Found	Not Found	1	0		0
High	Master Protein	A0A072TX81	6-phosphogluconate dehydrogenase, decarboxylating OS=Medicago truncatula GN=MTR_7g017900 PE=3 SV=1	0	94.553	35	15	53	13	486	53.7	5.78	189	15	Not Found	High	High	High	High	High	High	High	Not Found	High	High	High	High	High	High	High	Not Found	Not Found	High	High	High	High	High	High	1	0		0
High	Master Protein	I3S1W3	40S ribosomal protein S6 OS=Medicago truncatula GN=MTR_4g088595 PE=2 SV=1	0	208.123	47	23	181	13	248	28.2	10.7	783.69	23	Not Found	High	High	High	High	High	High	High	High	High	High	High	High	High	High	Not Found	High	High	High	High	High	High	High	High	1	0		0		Deamidated [R133]
High	Master Protein	G7LBU3	Malic enzyme OS=Medicago truncatula GN=MTR_8g032040 PE=3 SV=1	0	81.601	27	16	34	13	604	66.6	6.76	114.99	16	High	High	High	High	High	Not Found	High	Not Found	Not Found	High	High	High	High	Not Found	High	High	Not Found	High	Not Found	High	High	Not Found	High	High	1	0		0
High	Master Protein	G7IV56	LRR receptor-like kinase OS=Medicago truncatula GN=MTR_3g062590 PE=3 SV=1	0	144.56	23	19	77	13	955	105.4	6.8	316.57	19	High	High	Medium	Not Found	High	High	High	High	High	High	Not Found	High	High	High	High	High	High	High	High	Not Found	High	High	High	High	1	0		0
High	Master Protein	A0A072TKH3	NADH dehydrogenase [ubiquinone] 1 alpha subcomplex subunit 12 OS=Medicago truncatula GN=MTR_8g009960 PE=3 SV=1	0	63.723	48	13	81	13	159	18.4	8.84	263.36	13	High	High	High	High	High	High	High	High	High	Not Found	High	High	High	High	High	High	High	Not Found	High	High	High	High	High	High	1	0		0
High	Master Protein	G7L5A1	Alpha amylase domain protein OS=Medicago truncatula GN=MTR_7g013300 PE=4 SV=2	0	82.536	18	13	26	13	962	109.2	6.29	98.31	13	Not Found	High	High	Not Found	Not Found	Not Found	High	Not Found	Not Found	High	High	High	Not Found	Not Found	Not Found	High	Not Found	High	High	Not Found	Not Found	Not Found	Not Found	Medium	1	0		0
High	Master Protein	G7J013	Serine-glyoxylate aminotransferase-like protein OS=Medicago truncatula GN=MTR_3g053890 PE=3 SV=1	0	109.762	33	15	119	13	401	43.9	7.11	434.16	15	High	High	High	High	High	High	High	High	Not Found	High	High	High	High	High	High	High	Not Found	High	High	High	High	High	High	High	1	0		0		Deamidated [Q23; R36]
High	Master Protein	G7K650	Vacuolar iron transporter-like protein OS=Medicago truncatula GN=MTR_5g068580 PE=4 SV=2	0	105.989	19	13	42	13	938	102.8	4.98	183.62	13	Not Found	High	High	High	High	Not Found	Not Found	Not Found	Not Found	High	High	High	High	High	Not Found	High	Not Found	Not Found	High	High	High	High	Not Found	Medium	1	0		0
High	Master Protein	G7IS29	Lipoxygenase OS=Medicago truncatula GN=MTR_2g099560 PE=3 SV=1	0	146.088	32	22	55	13	863	96.9	6.28	205.58	22	Not Found	Not Found	High	High	High	High	High	High	Not Found	Not Found	High	High	High	High	High	High	Not Found	High	High	High	Not Found	High	High	High	1	0		0		Deamidated [R580; Q791; Q805; Q808]
High	Master Protein	A0A072V1Y6	NAD-dependent epimerase/dehydratase family protein OS=Medicago truncatula GN=MTR_4g115730 PE=4 SV=1	0	111.439	52	13	87	13	252	27.2	5.76	356.42	13	Not Found	High	High	High	High	High	High	High	Not Found	Not Found	High	High	High	High	High	High	Not Found	Not Found	High	High	High	High	High	High	1	0		0
High	Master Protein	A0A072W040	NAD(P)-binding rossmann-fold protein OS=Medicago truncatula GN=MTR_1g100305 PE=3 SV=1	0	133.491	50	16	108	13	315	34.3	9.45	404.34	16	High	Not Found	High	High	High	High	High	High	High	High	High	High	High	High	High	High	High	High	High	High	High	High	High	High	1	0		0
High	Master Protein	I3SZG9	Chlorophyll a-b binding protein, chloroplastic OS=Medicago truncatula GN=MTR_5g098785 PE=2 SV=1	0	179.936	46	13	265	13	277	29.7	8.25	1123.9	13	High	High	High	High	High	High	High	High	High	High	High	High	High	High	High	High	High	High	High	High	High	High	High	High	1	0		0		Carboxymethyl [K186]; Deamidated [Q52; R57; Q58; R109; Q187]
High	Master Protein	G7K0Z4	Serine/Threonine-kinase TOR OS=Medicago truncatula GN=MTR_5g005380 PE=3 SV=2	0	99.235	7	13	21	13	2471	278.1	6.95	91.61	13	Not Found	High	High	High	High	High	High	High	Not Found	Not Found	High	High	Not Found	Not Found	Not Found	Not Found	Not Found	Not Found	Not Found	High	High	Not Found	Not Found	Not Found	1	0		0
High	Master Protein	B7FMR1	Elongation factor 1-beta OS=Medicago truncatula GN=MTR_5g088660 PE=2 SV=1	0	98.649	47	14	52	13	223	24.2	4.77	166.28	14	High	High	High	High	High	High	High	High	High	High	High	High	High	High	High	High	High	Not Found	High	Not Found	High	High	High	High	1	0		0
High	Master Protein	G7JHJ9	Uncharacterized protein OS=Medicago truncatula GN=MTR_4g083250 PE=2 SV=1	0	84.716	35	13	64	13	266	29.2	9.25	223.08	13	Not Found	Not Found	Not Found	High	High	High	High	High	Not Found	Not Found	High	High	High	High	High	High	Not Found	Not Found	High	High	High	High	High	High	1	0		0		Deamidated [Q84]
High	Master Protein	G7JK03	Serine/Threonine kinase, plant-type protein, putative OS=Medicago truncatula GN=MTR_4g085480 PE=4 SV=2	0	117.624	23	13	152	13	460	51.2	8.15	541.25	13	Not Found	High	High	High	High	High	High	High	Not Found	Not Found	High	High	High	High	High	High	High	High	High	High	High	High	High	High	1	0		0		Deamidated [R276]
High	Master Protein	A0A072ULK5	Vacuolar protein sorting protein OS=Medicago truncatula GN=MTR_4g056480 PE=4 SV=1	0	59.886	15	13	27	13	958	107.4	5.08	93.44	13	Not Found	High	High	High	Not Found	High	High	Not Found	Not Found	High	High	High	High	High	Not Found	High	Not Found	Not Found	High	High	High	High	Not Found	High	1	0		0
High	Master Protein	G7JA88	ABC transporter-like protein OS=Medicago truncatula GN=MTR_3g094740 PE=4 SV=2	0	144.241	32	26	115	13	744	83.7	8.85	430.26	26	Not Found	High	High	High	High	High	High	High	Not Found	High	High	High	High	High	High	High	Not Found	Not Found	High	Not Found	Not Found	High	High	High	1	0		0		Deamidated [Q404]
High	Master Protein	G7LFT6	Zn-dependent alcohol dehydrogenase family protein OS=Medicago truncatula GN=MTR_8g095220 PE=4 SV=1	0	95.557	30	13	72	13	425	45.6	7.91	293.65	13	Not Found	High	High	High	High	High	High	High	Not Found	High	High	High	High	High	High	High	Not Found	High	High	High	High	High	High	High	1	0		0
High	Master Protein	G7J8L6	50S ribosomal protein L3P OS=Medicago truncatula GN=MTR_3g118210 PE=3 SV=1	0	86.167	45	13	71	13	272	29.5	10.54	240.68	13	Not Found	High	High	High	High	High	High	High	Not Found	Not Found	High	High	High	High	High	High	Not Found	Not Found	High	High	High	High	High	High	1	0		0
High	Master Protein	B7FL29	40S ribosomal protein S4 OS=Medicago truncatula GN=MTR_5g018940 PE=2 SV=1	0	191.521	66	25	334	13	265	29.9	10.23	1217.28	25	High	High	High	High	High	High	High	High	High	High	High	High	High	High	High	High	High	High	High	High	High	High	High	High	1	0		0		Deamidated [R115; Q211]
High	Master Protein	A0A072TLY8	Strubbelig-receptor family 6 protein OS=Medicago truncatula GN=MTR_8g023560 PE=4 SV=1	0	104.945	20	14	112	13	685	74.3	6.62	406.21	14	Not Found	High	High	High	High	High	High	High	Not Found	Not Found	High	High	High	High	High	High	Not Found	High	High	High	High	High	High	High	1	0		0		Deamidated [Q313]
High	Master Protein	G7IKW4	p-loop nucleoside triphosphate hydrolase superfamily protein OS=Medicago truncatula GN=MTR_2g030420 PE=3 SV=1	0	86.645	25	15	68	13	466	53.5	8.34	259.76	15	Not Found	High	High	High	High	High	High	High	Not Found	High	High	High	High	High	High	High	Not Found	Not Found	High	High	High	High	High	Not Found	1	0		0
High	Master Protein	G7IU57	Carbamoyl-phosphate synthase large chain OS=Medicago truncatula GN=MTR_2g093280 PE=3 SV=1	0	52.043	12	13	59	13	1166	127.5	5.45	157.62	13	Not Found	Not Found	High	High	High	High	High	High	Not Found	Not Found	High	High	High	High	High	High	Not Found	Not Found	High	High	High	High	High	High	1	0		0
High	Master Protein	G7KEA8	Ubiquitin-activating enzyme E1 1 OS=Medicago truncatula GN=MTR_5g072480 PE=3 SV=1	0	81.994	17	13	21	13	1179	132	6.35	96.45	13	Not Found	Not Found	High	High	High	Not Found	High	High	Not Found	Not Found	High	High	Not Found	High	High	High	Not Found	Not Found	Not Found	High	Not Found	Not Found	High	High	1	0		0
High	Master Protein	G7J2E8	DUF399 family protein OS=Medicago truncatula GN=MTR_3g071970 PE=4 SV=1	0	85.684	18	13	31	13	780	86.4	8.21	146.51	13	High	High	High	High	High	High	Not Found	High	Not Found	High	High	High	High	High	Not Found	High	Not Found	High	High	High	High	Not Found	Not Found	Not Found	1	0		0
High	Master Protein	G7IAS5	White-brown-complex ABC transporter family protein OS=Medicago truncatula GN=MTR_1g108340 PE=4 SV=2	0	123.385	22	13	99	13	725	79.4	8.07	418.69	13	Not Found	High	Not Found	High	High	High	High	High	Not Found	High	Not Found	High	High	High	High	High	Not Found	High	Not Found	High	High	High	High	High	1	0		0		Deamidated [R348]
High	Master Protein	B7FIH8	Trans-2-enoyl-CoA reductase OS=Medicago truncatula GN=MTR_5g087590 PE=2 SV=1	0	115.577	28	13	113	13	310	36	9.6	481.65	13	Not Found	High	High	High	High	High	High	High	Not Found	High	High	High	High	High	High	High	High	High	High	High	High	High	High	High	1	0		0		Deamidated [Q30]
High	Master Protein	G7J6G0	Tonoplast monosaccharide transporter 2 OS=Medicago truncatula GN=MTR_3g116060 PE=3 SV=1	0	143.234	19	13	65	13	730	78.2	5.55	358.65	13	Not Found	High	High	High	High	High	High	High	Not Found	Not Found	Not Found	High	High	High	High	High	Not Found	Not Found	Not Found	High	High	High	High	High	1	0		0		Deamidated [Q459; Q466]
High	Master Protein	G7I682	Uncharacterized protein OS=Medicago truncatula GN=MTR_1g079870 PE=4 SV=1	0	110.123	38	13	51	13	449	50.4	5.45	231.99	13	Not Found	High	High	High	High	High	High	High	Not Found	High	High	High	High	High	High	High	Not Found	High	High	High	High	High	High	High	1	0		0
High	Master Protein	G7L4R0	Magnesium-protoporphyrin IX monomethyl ester cyclase OS=Medicago truncatula GN=MTR_7g088340 PE=3 SV=1	0	99.52	28	13	101	13	403	47.2	8.66	352.98	13	High	High	High	High	High	High	High	High	Not Found	Not Found	Not Found	High	High	High	High	High	High	Not Found	High	High	High	High	High	High	1	0		0
High	Master Protein	A0A072V740	Sucrose synthase OS=Medicago truncatula GN=MTR_2g044070 PE=3 SV=1	0	126.081	26	18	64	13	804	92.2	6.32	285.37	18	Not Found	Not Found	High	High	High	High	High	High	Not Found	High	High	High	High	High	High	High	Not Found	High	Medium	High	High	High	High	High	1	0		0
High	Master Protein	I3SI55	Light harvesting-like protein OS=Medicago truncatula GN=MTR_4g099340 PE=2 SV=1	0	119.963	45	13	109	13	258	28.8	6.54	485.59	13	High	High	High	High	High	High	High	High	Not Found	Not Found	High	High	High	High	High	High	High	High	High	High	High	High	High	High	1	0		0		Deamidated [R132; R256]
High	Master Protein	G7I8J4	Syntaxin of plants 122 protein OS=Medicago truncatula GN=MTR_1g056560 PE=3 SV=1	0	76.035	45	13	33	13	339	37.7	7.61	122.49	13	Not Found	Not Found	High	High	High	Medium	High	Medium	Not Found	Not Found	High	High	High	High	High	Not Found	Not Found	High	High	High	High	High	High	Medium	1	2	Phospho [S18; S265]	0		Phospho [S18; S265]
High	Master Protein	G7LBC4	Uncharacterized protein OS=Medicago truncatula GN=MTR_8g092100 PE=4 SV=2	0	59.518	5	14	27	13	3167	354.2	5.59	76.92	14	Not Found	High	High	Not Found	Not Found	High	Not Found	High	Not Found	Not Found	High	Not Found	Not Found	Not Found	High	High	Not Found	Not Found	High	High	High	High	High	High	1	0		0		Deamidated [Q16]
High	Master Protein	A0A072UTS6	Cullin-associated NEDD8-dissociated protein OS=Medicago truncatula GN=MTR_4g134620 PE=4 SV=1	0	85.759	12	13	30	13	1205	132.7	5.95	125.07	13	High	High	High	High	High	High	High	High	Not Found	High	High	High	High	Not Found	High	High	Not Found	High	Not Found	Not Found	High	High	High	High	1	0		0		Deamidated [Q232]
High	Master Protein	A0A072TYH7	Oxygen-evolving complex/thylakoid lumenal 25.6 kDa protein OS=Medicago truncatula GN=MTR_7g023290 PE=4 SV=1	0	105.134	45	13	70	13	240	26.8	9.44	257.62	13	Not Found	High	Not Found	High	High	High	High	High	Not Found	High	High	High	High	High	High	High	Not Found	High	Not Found	High	High	High	High	High	1	0		0		Deamidated [Q91]
High	Master Protein	G7J2J8	TGN-related, localized SYP41-interacting protein, putative OS=Medicago truncatula GN=MTR_3g086150 PE=4 SV=1	0	62.437	8	13	19	13	1822	205.5	4.73	64.04	13	Not Found	High	High	Not Found	Not Found	Not Found	Not Found	High	High	Not Found	High	Not Found	Not Found	High	Not Found	Not Found	High	High	High	High	Not Found	Not Found	Not Found	High	1	0		0
High	Master Protein	G7JW29	DnaJ heat shock amino-terminal domain protein OS=Medicago truncatula GN=MTR_5g012530 PE=4 SV=2	0	88.727	24	13	59	13	540	59.8	9.04	223	13	Not Found	High	High	High	High	High	High	Not Found	Not Found	Not Found	High	High	High	High	High	High	Not Found	Not Found	High	High	High	High	High	High	1	0		0
High	Master Protein	G7J9U2	Transmembrane 9 superfamily member OS=Medicago truncatula GN=MTR_3g105950 PE=3 SV=1	0	170.216	20	16	125	13	636	73.2	8.22	550.71	16	Not Found	High	High	High	High	High	High	High	Not Found	High	High	High	High	High	High	High	Not Found	High	High	High	High	High	High	High	1	0		0		Deamidated [Q69]
High	Master Protein	B7FGY5	Cytochrome b-c1 complex subunit 7 OS=Medicago truncatula GN=MTR_1g011880 PE=2 SV=1	0	110.326	70	13	60	13	122	14.4	9.45	242.2	13	Not Found	Not Found	High	High	High	High	High	High	Not Found	Not Found	Not Found	High	High	High	High	Not Found	Not Found	Not Found	Not Found	High	High	High	High	High	1	0		0
High	Master Protein	A0A072UTX8	DnaJ heat shock amino-terminal domain protein OS=Medicago truncatula GN=MTR_3g435140 PE=4 SV=1	0	106.391	25	13	42	13	706	79.4	6.81	180.97	13	Not Found	Not Found	High	High	High	High	High	High	Not Found	Not Found	High	High	High	High	High	High	Not Found	Not Found	High	High	High	High	High	High	1	0		0
High	Master Protein	A0A072UB28	RAB6-interacting protein, putative OS=Medicago truncatula GN=MTR_6g082800 PE=4 SV=1	0	70.157	29	13	24	13	508	58.3	4.94	91.12	13	High	High	High	High	High	High	Not Found	Not Found	High	Not Found	High	High	Medium	Not Found	Not Found	Not Found	Not Found	High	High	High	High	Not Found	Not Found	Not Found	1	0		0		Deamidated [Q204]
High	Master Protein	G7LHF7	TCP-1/cpn60 chaperonin family protein OS=Medicago truncatula GN=MTR_8g017080 PE=3 SV=1	0	74.156	28	13	30	13	576	61.6	7.39	119.81	13	Not Found	High	High	High	High	Not Found	Not Found	Not Found	Not Found	Not Found	High	Not Found	High	High	High	Not Found	Not Found	Not Found	High	High	High	High	Not Found	Not Found	1	0		0
High	Master Protein	G7KQ77	Fructose-bisphosphate aldolase class-II protein OS=Medicago truncatula GN=MTR_6g069660 PE=4 SV=2	0	74.148	27	13	51	13	695	74.7	7.12	205.72	13	Not Found	High	High	High	High	High	High	High	Not Found	High	High	Not Found	High	High	High	High	Not Found	High	High	High	High	High	High	High	1	0		0
High	Master Protein	G7KSH3	Rhodanese/cell cycle control phosphatase superfamily protein, putative OS=Medicago truncatula GN=MTR_7g080890 PE=4 SV=1	0	167.534	46	13	59	13	355	39.7	8.88	275.7	13	High	High	High	High	High	High	High	High	High	High	High	Not Found	High	High	High	High	Not Found	High	High	Not Found	High	High	High	High	1	0		0		Deamidated [Q189; Q289; Q309]
High	Master Protein	G7KLA3	ERD (Early-responsive to dehydration stress) family protein OS=Medicago truncatula GN=MTR_6g012870 PE=4 SV=2	0	84.966	15	13	34	13	712	81.2	8.5	126.94	13	High	Not Found	High	Not Found	High	Not Found	Not Found	High	Not Found	High	High	Not Found	High	High	Not Found	High	Not Found	High	High	High	Not Found	High	Not Found	High	1	0		0
High	Master Protein	A0A072UW90	60 kDa inner membrane protein OS=Medicago truncatula GN=MTR_4g063705 PE=3 SV=1	0	167.972	23	13	93	13	444	48.6	9.32	484.04	13	High	High	High	High	High	High	High	High	High	High	High	High	High	High	High	High	High	High	High	High	High	High	High	High	1	0		0
High	Master Protein	A0A072TZU1	Uncharacterized protein OS=Medicago truncatula GN=MTR_7g445370 PE=4 SV=1	0	87.52	43	13	66	13	276	30.9	9.31	230.4	13	High	Not Found	High	High	High	High	High	High	High	Not Found	High	High	High	High	High	High	High	Not Found	High	High	High	High	High	Not Found	1	0		0
High	Master Protein	G7LIT9	Mg-protoporphyrin IX methyltransferase OS=Medicago truncatula GN=MTR_8g100120 PE=4 SV=1	0	90.59	31	13	47	13	324	35.1	6.7	160.51	13	High	High	High	High	High	High	High	High	High	High	High	High	High	High	High	High	High	High	High	High	High	Not Found	Not Found	Not Found	1	0		0		Deamidated [Q195]
High	Master Protein	G7JCA1	Zinc finger protein, putative OS=Medicago truncatula GN=MTR_3g108360 PE=4 SV=2	0	69.158	7	13	21	13	2469	275.6	5.91	75.01	13	Not Found	High	High	High	High	Not Found	Not Found	Not Found	Not Found	Not Found	High	High	High	High	High	High	Not Found	Not Found	High	Not Found	High	Not Found	High	High	1	0		0
High	Master Protein	G7INT9	Chlorophyll a-b binding protein, chloroplastic OS=Medicago truncatula GN=MTR_2g008610 PE=3 SV=1	0	187.998	49	13	187	13	261	27.7	6.6	787.35	13	High	High	High	High	High	High	High	High	High	High	High	High	High	High	High	High	High	High	High	High	High	High	High	High	1	2	Phospho [T192; T211]	0		Phospho [T192; T211]; Deamidated [Q195; R226]
High	Master Protein	G7L0K9	Eukaryotic translation initiation factor 3 subunit A OS=Medicago truncatula GN=MTR_7g099920 PE=3 SV=1	0	66.07	12	14	40	13	959	111.7	9.26	140.87	14	High	High	High	High	Not Found	Not Found	Not Found	Medium	High	High	High	High	Not Found	Not Found	High	High	Not Found	High	High	High	Not Found	Medium	High	High	1	0		0
High	Master Protein	G7IEA3	Dihydroorotate dehydrogenase (quinone), mitochondrial OS=Medicago truncatula GN=MTR_1g114530 PE=3 SV=1	0	97.821	28	13	50	13	455	48.6	9.26	212.36	13	High	High	High	High	High	Not Found	High	High	High	High	High	High	High	High	High	High	High	Not Found	High	High	High	High	High	High	1	0		0
High	Master Protein	G7IQZ2	LRR receptor-like kinase OS=Medicago truncatula GN=MTR_2g075250 PE=4 SV=1	0	117.255	20	19	86	13	1011	111.6	6.57	315.08	19	Not Found	Not Found	Not Found	High	High	High	High	High	Not Found	Not Found	High	High	High	High	High	High	Not Found	Not Found	High	High	High	High	High	High	1	0		0
High	Master Protein	G7J862	Rhodanese/cell cycle control phosphatase superfamily protein OS=Medicago truncatula GN=MTR_3g092040 PE=2 SV=1	0	85.257	38	13	67	13	232	26.1	8.87	237.86	13	High	High	High	High	High	High	High	High	High	Not Found	High	High	High	High	High	Medium	High	Not Found	High	High	High	High	High	High	1	0		0		Deamidated [R76; R107]
High	Master Protein	G7KTS9	LRR receptor-like kinase OS=Medicago truncatula GN=MTR_7g021570 PE=3 SV=2	0	83.86	17	17	78	13	963	107.3	7.08	233.65	17	High	High	High	High	High	High	High	High	Not Found	High	Medium	High	High	High	High	High	High	Not Found	High	High	High	High	High	High	1	1	Phospho [S777]	0		Phospho [S777]
High	Master Protein	G7L9W1	Exocyst complex component Sec10 OS=Medicago truncatula GN=MTR_8g023330 PE=4 SV=2	0	88.614	20	13	34	13	821	90.1	5.47	131.32	13	Not Found	High	Not Found	High	High	Not Found	Not Found	High	Not Found	High	High	High	High	High	High	High	Not Found	High	High	High	High	Not Found	Not Found	Not Found	1	0		0
High	Master Protein	G7JFC4	Raffinose synthase or seed inhibition protein OS=Medicago truncatula GN=MTR_4g115330 PE=4 SV=2	0	116.349	21	13	37	13	795	87.7	5.91	158.42	13	Not Found	High	Not Found	High	High	High	High	High	Not Found	Not Found	Not Found	High	High	High	High	Not Found	Not Found	Medium	Not Found	High	High	High	High	High	1	0		0
High	Master Protein	A0A072TV12	Heat shock cognate 70 kDa-like protein OS=Medicago truncatula GN=MTR_8g099945 PE=3 SV=1	0	531.825	61	54	429	13	669	73.6	5.12	1744.04	54	High	High	High	High	High	High	High	High	High	High	High	High	Not Found	High	High	High	High	High	Not Found	High	High	High	High	High	1	0		0		Deamidated [Q65; Q362]
High	Master Protein	E2FKJ1	Sieve element occlusion by forisomes 2 OS=Medicago truncatula GN=SEO-F2 PE=2 SV=1	0	91.457	20	13	27	13	675	77.3	7.18	121.86	13	Not Found	High	High	High	High	High	High	High	Not Found	High	Not Found	High	Not Found	High	High	High	Not Found	High	High	High	High	High	High	High	1	0		0
High	Master Protein	G7K6V0	Methyltransferase PMT16, putative OS=Medicago truncatula GN=MTR_5g026930 PE=4 SV=1	0	89.531	26	15	48	13	598	68.5	8.68	195.17	15	Not Found	Not Found	High	High	High	High	High	High	Not Found	High	Not Found	High	High	High	High	High	Not Found	High	High	High	High	High	High	High	1	0		0
High	Master Protein	A0A072VNR5	VAMP-associated protein OS=Medicago truncatula GN=MTR_1g081950 PE=4 SV=1	0	53.034	29	13	28	13	435	48.7	6.05	83.76	13	Not Found	High	Not Found	High	High	Not Found	Not Found	Not Found	High	High	High	Not Found	Not Found	Not Found	High	High	High	High	High	Not Found	High	High	High	High	1	0		0
High	Master Protein	G7K855	Plant/K24G6-12 protein OS=Medicago truncatula GN=MTR_5g027220 PE=4 SV=2	0	68.034	34	13	38	13	320	35.9	6.16	136.88	13	Not Found	High	High	High	High	High	High	High	Not Found	Not Found	Not Found	High	High	High	High	High	Not Found	Not Found	High	High	High	High	High	High	1	0		0
High	Master Protein	G7KX95	Alpha-mannosidase OS=Medicago truncatula GN=MTR_7g084030 PE=3 SV=2	0	89.801	16	16	49	13	1061	120.8	6.13	180.22	16	Not Found	High	High	High	High	High	High	High	Not Found	High	High	High	High	High	Not Found	Not Found	Not Found	High	High	High	High	High	High	High	1	0		0
High	Master Protein	A0A072TS46	Zinc-binding dehydrogenase family oxidoreductase OS=Medicago truncatula GN=MTR_8g064610 PE=4 SV=1	0	108.979	43	14	43	13	384	40.9	7.88	181.63	14	High	High	High	High	High	High	Not Found	Not Found	High	High	High	High	High	High	High	High	High	High	Not Found	High	High	High	High	High	1	0		0
High	Master Protein	G7IQI5	SOUL heme-binding family protein OS=Medicago truncatula GN=MTR_2g054130 PE=4 SV=1	0	76.432	30	13	84	13	382	43.9	8.75	282.12	13	High	High	High	High	High	High	High	High	Not Found	High	High	High	High	High	High	High	High	High	High	High	High	High	High	High	1	0		0
High	Master Protein	G7K791	LRR receptor-like kinase OS=Medicago truncatula GN=MTR_5g083480 PE=4 SV=1	0	111.341	25	18	38	13	786	85.5	7.96	145.53	18	Not Found	High	High	High	Medium	Not Found	Not Found	High	Medium	High	High	High	Not Found	Not Found	Not Found	High	High	High	High	High	High	Not Found	Not Found	High	1	0		0
High	Master Protein	G7L2L3	NADH-cytochrome b5 reductase OS=Medicago truncatula GN=MTR_7g087090 PE=2 SV=1	0	126.458	45	13	115	12	278	30.8	8.22	503.93	13	Not Found	High	High	High	High	High	High	High	Not Found	High	High	High	High	High	High	High	High	High	High	High	High	High	High	High	1	0		0
High	Master Protein	G7LGQ4	Stem 28 kDa glycoprotein OS=Medicago truncatula GN=MTR_8g014650 PE=2 SV=1	0	76.839	33	12	109	12	261	29.9	7.09	384.66	12	Not Found	High	High	High	High	High	High	High	Not Found	High	High	High	High	High	High	High	Not Found	High	High	High	High	High	High	High	1	0		0
High	Master Protein	G7JC94	60S acidic ribosomal protein P0 OS=Medicago truncatula GN=MTR_3g108280 PE=3 SV=1	0	108.438	37	12	74	12	323	34.4	5.34	352.95	12	Not Found	High	High	High	High	High	High	High	High	High	High	Not Found	High	High	High	High	High	High	Not Found	High	High	High	High	High	1	1	Phospho [S311]	0		Phospho [S311]
High	Master Protein	A0A072UCM8	Phosphotransferase OS=Medicago truncatula GN=MTR_6g088795 PE=3 SV=1	0	101.665	36	15	69	12	496	53.7	6	270.82	15	Not Found	Not Found	High	High	High	High	High	High	Not Found	Not Found	Not Found	Not Found	High	High	High	High	Not Found	Not Found	Not Found	Not Found	High	High	High	High	1	0		0
High	Master Protein	G7JCN3	Aspartate aminotransferase OS=Medicago truncatula GN=MTR_4g080140 PE=4 SV=1	0	128.911	45	12	56	12	424	47.3	8.02	263.43	12	Not Found	High	High	High	High	High	High	High	Not Found	High	High	High	Not Found	High	High	High	High	High	High	High	High	High	High	High	1	0		0
High	Master Protein	A0A072U4I6	Violaxanthin de-epoxidase OS=Medicago truncatula GN=MTR_7g116630 PE=3 SV=1	0	80.339	32	12	38	12	363	41.3	4.73	141.83	12	Not Found	High	High	High	High	High	High	High	Not Found	Not Found	High	High	High	High	High	Not Found	Not Found	Not Found	High	High	High	Not Found	High	Not Found	1	0		0
High	Master Protein	A0A072UC24	Coiled-coil vesicle tethering protein, putative OS=Medicago truncatula GN=MTR_6g088595 PE=4 SV=1	0	86.988	20	12	23	12	711	79.4	5.22	101.42	12	High	High	High	High	High	Not Found	Not Found	Not Found	Not Found	High	High	High	Not Found	Not Found	Not Found	Not Found	Not Found	High	High	High	High	Not Found	Not Found	Not Found	1	1	Phospho [S177]	0		Phospho [S177]
High	Master Protein	G7L900	3-hydroxyisobutyryl-CoA hydrolase-like protein OS=Medicago truncatula GN=MTR_8g103840 PE=3 SV=1	0	82.435	39	12	30	12	377	41	5.91	111.08	12	High	High	High	High	Not Found	Not Found	Not Found	High	High	High	Not Found	Not Found	High	High	High	High	High	High	Not Found	High	High	Not Found	Not Found	High	1	0		0
High	Master Protein	B7FGU7	Cytochrome b6-f complex iron-sulfur subunit OS=Medicago truncatula GN=MTR_2g089510 PE=2 SV=1	0	141.783	43	12	183	12	229	23.9	7.62	839.97	12	High	High	High	High	High	High	High	High	High	High	High	High	High	High	High	High	High	High	High	High	High	High	High	High	1	2	Phospho [T129; S195]	0		Carboxymethyl [K171; K209]; Phospho [T129; S195]; Deamidated [Q130]
High	Master Protein	G7K743	Long chain base biosynthesis protein 1a OS=Medicago truncatula GN=MTR_5g072020 PE=4 SV=2	0	92.354	24	12	49	12	480	52.8	7.02	190.25	12	Not Found	High	High	High	High	High	High	High	Not Found	High	High	High	High	High	High	High	Not Found	Not Found	High	High	High	High	High	High	1	0		0
High	Master Protein	A0A072U2W1	Triosephosphate isomerase OS=Medicago truncatula GN=MTR_7g103020 PE=3 SV=1	0	87.068	45	13	49	12	312	33.4	7.02	212.8	13	High	Not Found	High	Not Found	High	High	High	High	Medium	High	Not Found	High	High	High	High	High	High	Not Found	Not Found	High	High	Not Found	High	High	1	0		0
High	Master Protein	G7JVN6	UDP-glucose:sterol 3-O-glucosyltransferase OS=Medicago truncatula GN=MTR_4g022580 PE=4 SV=1	0	236.489	37	22	151	12	623	68.4	6.46	740.85	22	Not Found	High	High	High	High	High	High	High	Not Found	Not Found	High	High	High	High	High	High	Not Found	Not Found	Not Found	High	High	High	High	High	1	3	Phospho [T75; S89; T133]	0		Phospho [T75; S89; T133]
High	Master Protein	G7J5I7	RNA-metabolising metallo-beta-lactamase OS=Medicago truncatula GN=MTR_3g089020 PE=4 SV=2	0	50.115	16	12	23	12	867	96.3	7.96	77.11	12	Not Found	High	High	High	High	High	Not Found	High	Not Found	High	High	High	Not Found	Not Found	Not Found	High	Not Found	High	High	High	High	Not Found	Not Found	High	1	0		0
High	Master Protein	A0A072THI5	Ubiquinone biosynthesis protein UbiB OS=Medicago truncatula GN=MTR_0053s0030 PE=4 SV=1	0	79.691	20	15	65	12	701	78.1	6	211.7	15	High	High	Not Found	Not Found	High	High	High	High	High	High	Not Found	High	High	High	High	High	High	High	Not Found	High	High	High	High	High	1	0		0
High	Master Protein	A0A072TNQ4	Mechanosensitive ion channel protein MscS OS=Medicago truncatula GN=MTR_8g028760 PE=4 SV=1	0	113.608	23	12	50	12	548	59.4	9.01	216.74	12	Not Found	High	High	High	High	High	High	High	Not Found	Not Found	High	High	High	High	High	High	Not Found	Not Found	Not Found	Not Found	High	High	High	High	1	0		0
High	Master Protein	G7J7V5	Cysteine-rich RLK (Receptor-like kinase) protein OS=Medicago truncatula GN=MTR_3g064090 PE=4 SV=1	0	105.851	28	15	62	12	646	70.7	8.09	265	15	High	High	Not Found	High	High	High	High	High	High	High	High	High	High	High	High	High	High	High	High	High	High	High	High	High	1	0		0
High	Master Protein	A0A072TXB9	RPM1 interacting protein 4 transcript protein OS=Medicago truncatula GN=MTR_8g012960 PE=4 SV=1	0	79.219	54	12	40	12	260	28.5	9.17	174.4	12	Medium	High	High	High	Not Found	High	High	Not Found	Not Found	High	High	High	Not Found	High	High	Not Found	Not Found	High	High	Not Found	Not Found	Not Found	Not Found	Not Found	1	4	Phospho [S144; S158; T174; T189]	0		Phospho [S144; S158; T174; T189]
High	Master Protein	A0A072UQW2	31 kDa ribonucleoprotein OS=Medicago truncatula GN=MTR_4g104470 PE=4 SV=1	0	104.368	41	12	70	12	300	33.5	5.05	267.83	12	High	High	High	High	High	High	High	High	Not Found	High	High	High	High	High	High	High	Not Found	High	High	High	High	High	High	High	1	0		0
High	Master Protein	A0A072TFV7	50S ribosomal protein L6 OS=Medicago truncatula GN=MTR_0316s0010 PE=3 SV=1	0	87.447	67	12	49	12	163	18.3	9.72	172.24	12	Not Found	Not Found	Not Found	High	High	High	High	High	Not Found	Not Found	High	High	High	High	High	High	High	Not Found	High	High	High	High	High	High	1	0		0
High	Master Protein	A0A072U1U3	LRR receptor-like Serine/Threonine-kinase RKF3, putative OS=Medicago truncatula GN=MTR_7g094100 PE=4 SV=1	0	89.465	25	16	42	12	661	73	6.81	134.14	16	Not Found	Not Found	High	High	Not Found	High	High	High	Not Found	Not Found	Not Found	High	Not Found	Not Found	Not Found	High	Not Found	Not Found	Not Found	High	High	Not Found	Not Found	High	1	0		0
High	Master Protein	G7IKV5	Malectin/receptor-like kinase family protein OS=Medicago truncatula GN=MTR_2g030310 PE=4 SV=2	0	82.8	16	14	45	12	855	93.9	6.05	150.49	14	Not Found	High	High	High	High	High	High	Not Found	Not Found	Not Found	High	High	High	High	Not Found	Not Found	Not Found	High	High	High	High	High	Not Found	Not Found	1	0		0
High	Master Protein	G7K4W1	Carboxy-terminal TIM barrel domain enolase OS=Medicago truncatula GN=MTR_5g096970 PE=3 SV=1	0	84.47	29	14	42	12	473	51.6	5.68	137.96	14	Not Found	High	High	High	High	Not Found	Not Found	High	Not Found	High	High	High	High	High	Not Found	Not Found	Not Found	High	Not Found	High	High	Not Found	Not Found	High	1	0		0		Deamidated [Q452]
High	Master Protein	G7KE90	Ubiquinol oxidase OS=Medicago truncatula GN=MTR_5g070870 PE=3 SV=1	0	139.29	34	13	103	12	324	37.1	8.48	489	13	Not Found	High	High	High	High	High	High	High	Not Found	High	High	High	High	High	High	High	Not Found	High	High	High	High	High	High	High	1	0		0		Deamidated [R82]
High	Master Protein	G7KTZ4	Structural constituent of nuclear pore protein, putative OS=Medicago truncatula GN=MTR_7g045280 PE=4 SV=2	0	68.678	46	12	31	12	270	30	4.55	108.83	12	High	High	High	High	High	Not Found	Not Found	High	High	High	High	Not Found	Not Found	Not Found	Not Found	High	High	Not Found	High	Not Found	Not Found	Not Found	High	High	1	0		0		Deamidated [Q149]
High	Master Protein	G7LDG5	Malic enzyme OS=Medicago truncatula GN=MTR_8g009500 PE=3 SV=1	0	59.349	22	12	19	12	628	70	5.87	66.34	12	Not Found	Not Found	High	High	High	High	Not Found	Not Found	Not Found	High	High	Medium	High	High	Not Found	High	High	High	Not Found	Not Found	High	High	High	Not Found	1	0		0
High	Master Protein	A0A072UVP0	ABC-type transport system protein OS=Medicago truncatula GN=MTR_3g040090 PE=4 SV=1	0	116.228	32	12	98	12	446	48.9	7.01	420.41	12	Not Found	High	High	High	High	High	High	High	Not Found	High	High	High	High	High	High	High	Not Found	Not Found	High	High	High	High	High	High	1	0		0
High	Master Protein	G7JS60	Thioredoxin-dependent peroxidase OS=Medicago truncatula GN=MTR_4g124790 PE=2 SV=2	0	152.307	42	12	74	12	221	24.2	9.47	370.9	12	Not Found	High	Not Found	High	High	High	High	High	Not Found	High	High	High	High	High	High	High	High	High	High	High	High	High	High	High	1	0		0		Deamidated [Q198]
High	Master Protein	A0A072VBZ7	Two pore calcium channel protein, putative OS=Medicago truncatula GN=MTR_2g090380 PE=4 SV=1	0	121.106	14	12	76	12	737	84.8	5.06	316.28	12	Not Found	High	High	High	High	High	High	High	Not Found	High	High	High	High	High	High	High	Not Found	High	High	High	High	High	High	High	1	0		0
High	Master Protein	A0A072VE74	Plasma membrane ATPase OS=Medicago truncatula GN=MTR_1g009760 PE=3 SV=1	0	460.869	41	45	393	12	951	104.7	7.58	1608.15	45	Not Found	High	High	High	High	High	High	High	Not Found	Not Found	High	High	High	High	High	High	Not Found	Not Found	High	High	High	High	High	High	1	3	Phospho [S933; T944; T950]	0		Phospho [S933; T944; T950]; Deamidated [Q145]
High	Master Protein	G7L6L7	CAAX prenyl protease-like protein OS=Medicago truncatula GN=MTR_7g078760 PE=3 SV=1	0	85.605	28	12	49	12	426	48.5	8.38	160.5	12	Not Found	High	High	High	High	High	High	High	Not Found	High	High	High	High	High	High	High	Not Found	High	High	High	High	High	High	High	1	0		0
High	Master Protein	A0A072TTY6	Acyl-coenzyme A oxidase OS=Medicago truncatula GN=MTR_8g090375 PE=3 SV=1	0	69.466	17	12	23	12	689	77.3	8.5	86.01	12	Not Found	Not Found	High	High	Not Found	High	Not Found	High	Not Found	Not Found	Not Found	High	High	High	High	Medium	Not Found	Not Found	Medium	High	High	Not Found	High	High	1	0		0
High	Master Protein	G7L099	Brefeldin A-inhibited guanine nucleotide-exchange protein OS=Medicago truncatula GN=MTR_7g075030 PE=4 SV=1	0	71.681	7	12	33	12	1789	199.4	5.67	126.03	12	Not Found	High	High	Not Found	High	Medium	High	Not Found	Not Found	Not Found	High	Not Found	High	High	High	Not Found	Not Found	High	High	High	High	High	High	High	1	0		0
High	Master Protein	G7J2S0	Substrate carrier family protein OS=Medicago truncatula GN=MTR_3g098460 PE=3 SV=1	0	113.258	33	15	61	12	483	54	6.01	240.24	15	Not Found	High	High	High	High	High	High	High	Not Found	High	High	High	High	High	High	High	Not Found	High	High	High	High	High	High	High	1	0		0		Deamidated [Q287]
High	Master Protein	G7JSU6	Prohibitin complex protein OS=Medicago truncatula GN=MTR_4g078200 PE=4 SV=1	0	313.509	80	23	259	12	293	32.3	9.32	1091.36	23	High	High	High	High	High	High	High	High	High	High	High	Not Found	High	High	High	High	High	High	High	High	High	High	High	High	1	1	Phospho [S143]	0		Deamidated [Q116; Q147; Q152; Q240]; Phospho [S143]
High	Master Protein	A0A072U527	NADH dehydrogenase OS=Medicago truncatula GN=MTR_8g094730 PE=4 SV=1	0	89.911	27	13	37	12	530	58.1	7.83	171.13	13	High	High	Not Found	High	High	High	High	High	Not Found	Not Found	Not Found	Medium	High	High	High	High	High	Not Found	Not Found	Not Found	High	High	High	High	1	0		0
High	Master Protein	G7JQG0	Cytochrome B561, amino-terminal protein OS=Medicago truncatula GN=MTR_4g060500 PE=4 SV=1	0	88.216	24	12	30	12	679	73.8	8.84	126.41	12	Not Found	Not Found	High	High	High	High	High	High	Not Found	Not Found	High	High	High	High	Not Found	High	Not Found	Not Found	Not Found	High	High	Medium	Not Found	High	1	0		0
High	Master Protein	A0A072VX57	Caleosin CLO1-1 OS=Medicago truncatula GN=MTR_1g073640 PE=4 SV=1	0	86.999	37	12	74	12	241	27.3	6.54	318.58	12	High	High	High	High	High	High	High	High	High	High	High	High	High	High	High	High	High	High	Not Found	High	High	High	High	High	1	0		0
High	Master Protein	G7IUA3	Receptor-like kinase, putative OS=Medicago truncatula GN=MTR_2g096160 PE=4 SV=1	0	136.773	25	19	83	12	847	92.9	5.85	333.71	19	Not Found	High	High	Not Found	High	High	High	High	Not Found	High	High	Not Found	High	High	High	High	High	High	High	High	High	High	High	High	1	1	Phospho [S839]	0		Phospho [S839]
High	Master Protein	G7L4A2	Tplate-like protein OS=Medicago truncatula GN=MTR_7g031450 PE=4 SV=1	0	57.803	13	12	26	12	934	103.6	5.96	85.04	12	Not Found	Not Found	Not Found	High	Not Found	High	High	Not Found	High	High	Not Found	Not Found	Not Found	High	High	Not Found	High	High	Not Found	Not Found	High	High	High	High	1	0		0
High	Master Protein	G7I4W6	S-adenosylmethionine-dependent methyltransferase, putative OS=Medicago truncatula GN=MTR_1g075900 PE=4 SV=2	0	102.564	28	18	95	12	624	70.5	6.49	357.14	18	Not Found	High	High	High	High	High	High	High	Not Found	Not Found	High	High	High	High	High	High	Not Found	Not Found	High	High	High	High	High	High	1	0		0		Deamidated [Q330]
High	Master Protein	G7JAC3	LRR receptor-like kinase family protein OS=Medicago truncatula GN=MTR_3g095100 PE=3 SV=1	0	54.929	11	12	30	12	1188	130.6	6.55	84.83	12	Not Found	High	Not Found	High	Not Found	High	High	High	Not Found	High	High	High	Not Found	High	High	High	Not Found	Not Found	Not Found	High	High	High	High	Not Found	1	0		0
High	Master Protein	A0A072TI06	S-locus lectin kinase family protein OS=Medicago truncatula GN=MTR_0148s0080 PE=4 SV=1	0	62.203	14	14	40	12	1022	116.3	6	96.74	14	Not Found	High	High	Not Found	High	High	High	High	Not Found	High	High	Not Found	Not Found	High	High	High	Not Found	High	High	High	High	High	High	Not Found	1	0		0		Deamidated [Q826]
High	Master Protein	G7IMZ7	Lysine--tRNA ligase OS=Medicago truncatula GN=MTR_2g036600 PE=3 SV=1	0	71.737	26	13	47	12	604	69	6.34	174.07	13	High	High	High	High	High	High	High	Not Found	Not Found	High	High	High	High	High	High	Not Found	High	High	High	High	High	High	High	Not Found	1	0		0
High	Master Protein	A0A072V056	Enhanced disease susceptibility protein OS=Medicago truncatula GN=MTR_3g078633 PE=4 SV=1	0	64.028	20	12	24	12	618	70.6	6.96	82.34	12	High	High	High	High	High	High	Not Found	High	Not Found	Not Found	High	High	Not Found	High	Not Found	High	High	Not Found	High	High	High	High	High	High	1	0		0
High	Master Protein	Q2MJ21	Cytochrome P450 family monooxygenase OS=Medicago truncatula GN=CYP72A67 PE=2 SV=1	0	71.927	20	14	55	12	520	59.8	8.9	193.43	14	Not Found	High	High	High	High	High	High	High	Not Found	High	High	Not Found	High	High	High	High	Not Found	High	Medium	High	High	High	High	High	1	0		0
High	Master Protein	G7IA25	Transmembrane protein, putative OS=Medicago truncatula GN=MTR_1g035040 PE=4 SV=1	0	113.404	13	12	18	12	1290	143.6	4.5	80.4	12	Not Found	High	High	Not Found	Not Found	Not Found	High	Not Found	Not Found	High	High	High	Not Found	Not Found	Not Found	Not Found	Not Found	High	Not Found	Not Found	Not Found	Not Found	High	Not Found	1	0		0
High	Master Protein	A0A072VPX6	Cytochrome P450 family flavone synthase OS=Medicago truncatula GN=MTR_1g107295 PE=3 SV=1	0	49.552	18	12	25	12	528	60.4	7.72	86.02	12	Not Found	High	Not Found	High	High	High	High	Not Found	Not Found	High	High	High	Not Found	Not Found	High	High	Not Found	High	High	High	High	High	High	High	1	0		0
High	Master Protein	G7KFF7	Serine/Threonine kinase family protein OS=Medicago truncatula GN=MTR_5g099130 PE=3 SV=2	0	92.362	37	13	48	12	388	42.3	9.04	165.67	13	Not Found	Not Found	Not Found	High	High	High	High	High	Not Found	Not Found	Not Found	High	High	High	High	High	Not Found	Not Found	Not Found	Not Found	High	High	High	High	1	0		0
High	Master Protein	G7JU01	Glutathione-regulated potassium-efflux system protein kefB OS=Medicago truncatula GN=MTR_4g092790 PE=4 SV=2	0	114.11	16	12	54	12	796	86.5	5.43	245.41	12	Medium	High	High	High	High	High	High	High	High	High	High	High	High	High	High	High	High	High	High	High	High	High	High	High	1	0		0
High	Master Protein	A0A072VWM1	TPR 7B-like protein OS=Medicago truncatula GN=MTR_1g069630 PE=4 SV=1	0	65.709	20	12	22	12	713	79.7	7.33	79.6	12	Not Found	High	High	High	High	High	High	Not Found	Not Found	Not Found	High	Not Found	High	Not Found	High	Not Found	Not Found	Not Found	High	High	High	High	High	High	1	0		0
High	Master Protein	G7KFG0	Calcium-binding EF hand-like protein OS=Medicago truncatula GN=MTR_5g099170 PE=4 SV=2	0	70.188	16	13	24	12	1001	109.5	5.21	103.36	13	High	High	High	High	High	High	Not Found	Not Found	High	Not Found	High	High	Not Found	High	Not Found	Not Found	High	Not Found	High	Not Found	Medium	High	High	Not Found	1	0		0		Deamidated [Q328]
High	Master Protein	A0A072VYH6	Fungal proteinase A, aspartic proteinase superfamily protein OS=Medicago truncatula GN=MTR_1g484940 PE=3 SV=1	0	145.88	18	12	122	12	508	55.6	5.8	596.67	12	Not Found	High	High	High	High	High	High	High	Not Found	High	High	High	High	High	High	High	Not Found	High	High	High	High	High	High	High	1	0		0		Deamidated [Q260]
High	Master Protein	A0A072UYD4	ARM repeat RING/U-box protein OS=Medicago truncatula GN=MTR_3g466220 PE=4 SV=1	0	63.836	20	12	21	12	836	90.6	5.69	76.95	12	Not Found	Not Found	High	High	High	High	Not Found	Not Found	Not Found	Not Found	High	High	High	Not Found	High	High	Not Found	High	High	Not Found	High	High	Not Found	High	1	0		0		Deamidated [R749]
High	Master Protein	G7J4F3	Bacterial long-chain fatty acid CoA synthetase OS=Medicago truncatula GN=MTR_3g087980 PE=4 SV=2	0	88.881	23	15	83	12	694	76.1	7.43	272.09	15	Not Found	High	High	High	High	High	High	High	Not Found	Not Found	Not Found	High	High	High	High	High	Not Found	Not Found	Not Found	High	High	High	High	High	1	0		0
High	Master Protein	A0A072VM79	Serine/Threonine kinase family protein OS=Medicago truncatula GN=MTR_1g077800 PE=4 SV=1	0	87.1	23	12	22	12	717	79.4	6.47	103.98	12	Not Found	High	High	Not Found	High	High	High	High	Not Found	High	High	High	Not Found	Not Found	Not Found	High	Not Found	High	High	High	High	High	Not Found	Not Found	1	0		0
High	Master Protein	B7FMX5	NADH dehydrogenase [ubiquinone] 1 alpha subcomplex subunit 6 OS=Medicago truncatula GN=MTR_8g040150 PE=2 SV=1	0	68.595	61	12	60	12	133	15.2	9.5	225.32	12	Not Found	High	High	High	High	High	High	High	Not Found	Not Found	High	High	High	High	High	High	High	High	High	High	High	High	High	High	1	0		0
High	Master Protein	A0A072VIH3	3-ketoacyl-CoA thiolase 2, peroxisomal-like protein OS=Medicago truncatula GN=MTR_1g047210 PE=3 SV=1	0	132.116	39	14	86	12	462	48.3	7.99	343.04	14	High	High	High	High	High	High	High	High	High	High	High	High	High	High	High	High	Not Found	High	High	High	High	High	High	High	1	0		0
High	Master Protein	G7IP46	Nucleoporin protein Ndc1-Nup OS=Medicago truncatula GN=MTR_2g018830 PE=4 SV=2	0	63.878	28	12	35	12	494	55.1	9.32	113.52	12	Not Found	Not Found	High	High	High	High	High	High	Not Found	Not Found	Not Found	High	High	High	High	High	Not Found	Not Found	High	High	High	High	High	High	1	0		0
High	Master Protein	G7JYH3	E3 ubiquitin-protein ligase UPL1-like protein OS=Medicago truncatula GN=MTR_5g066710 PE=4 SV=1	0	156.059	10	28	51	12	3655	401.9	5.21	184.58	28	High	High	Not Found	High	High	Not Found	Not Found	Not Found	Not Found	Not Found	High	High	High	Not Found	Not Found	Not Found	High	Not Found	Medium	High	High	Not Found	Not Found	Not Found	1	0		0
High	Master Protein	A0A072VTY6	Calmodulin-domain kinase CDPK protein OS=Medicago truncatula GN=MTR_1g052530 PE=4 SV=1	0	112.951	25	20	81	12	528	60.1	6.61	286.57	20	High	High	High	High	Not Found	High	High	Medium	Not Found	High	High	High	Not Found	Not Found	High	High	High	Not Found	High	High	High	Not Found	Not Found	High	1	0		0
High	Master Protein	A0A072U1Q8	Fructose-1,6-bisphosphatase OS=Medicago truncatula GN=MTR_7g066120 PE=3 SV=1	0	107.016	27	12	74	12	411	44.7	5.31	283.04	12	Not Found	High	High	High	High	High	High	High	Not Found	Not Found	High	High	High	High	High	High	Medium	Not Found	High	High	High	High	High	High	1	0		0
High	Master Protein	G7JVC5	NADH-cytochrome b5 reductase OS=Medicago truncatula GN=MTR_4g114030 PE=3 SV=1	0	88.048	39	12	96	12	325	35.9	8.68	340.31	12	Not Found	High	High	High	High	High	High	High	Not Found	High	Not Found	High	High	High	High	High	Not Found	High	Not Found	High	High	High	High	High	1	0		0
High	Master Protein	G7K5W0	Transporter family ABC domain protein OS=Medicago truncatula GN=MTR_5g075960 PE=4 SV=2	0	162.585	28	18	89	12	718	78.7	9.33	395.62	18	Not Found	High	High	High	High	High	Not Found	High	Not Found	High	High	High	Not Found	Not Found	High	High	Not Found	High	High	High	High	High	Not Found	High	1	0		0
High	Master Protein	A2Q5T7	H+-transporting two-sector ATPase, C (AC39) subunit OS=Medicago truncatula GN=MTR_7g009590 PE=4 SV=1	0	91.66	31	12	78	12	351	40.7	5.06	321.64	12	Not Found	High	High	High	High	High	High	High	Not Found	High	High	High	High	High	High	High	Not Found	High	High	High	High	High	High	Medium	1	0		0
High	Master Protein	G7K8S5	N-acyl-L-amino-acid amidohydrolase OS=Medicago truncatula GN=MTR_5g058430 PE=4 SV=1	0	79.42	38	12	57	12	355	39.2	5.8	208.67	12	Not Found	High	High	High	High	High	High	High	Not Found	High	High	High	High	High	High	High	Not Found	Not Found	High	High	High	High	High	High	1	0		0		Deamidated [R37]
High	Master Protein	A8W459	VAMP-associated protein OS=Medicago truncatula GN=MTR_4g027050 PE=2 SV=1	0	87.103	38	13	115	12	240	26.7	8.7	416.47	13	High	High	High	High	High	High	High	High	High	High	High	High	High	High	High	High	High	High	High	High	High	High	High	High	1	0		0		Deamidated [Q159]
High	Master Protein	G7IEN7	Sec-independent protein translocase OS=Medicago truncatula GN=MTR_1g100220 PE=4 SV=1	0	110.613	56	12	65	12	258	27.9	7.4	288.14	12	High	High	High	High	High	High	High	High	High	High	High	High	High	High	High	High	High	High	High	High	High	High	High	High	1	0		0		Deamidated [Q181]
High	Master Protein	G7K6M0	MAP3K-like kinase OS=Medicago truncatula GN=MTR_5g017090 PE=4 SV=1	0	102.852	36	13	103	12	407	44.3	7.97	294.18	13	High	High	High	High	High	High	High	High	High	Not Found	High	High	High	High	High	High	Not Found	High	High	High	High	High	High	High	1	0		0		Deamidated [R331]
High	Master Protein	A0A072U5E1	Plasma membrane ATPase OS=Medicago truncatula GN=MTR_6g011310 PE=3 SV=1	0	224.594	32	31	227	12	956	105.4	6.68	804.41	31	Not Found	Not Found	High	High	High	High	High	High	Not Found	Not Found	Not Found	Not Found	High	High	High	High	Not Found	Not Found	High	High	Not Found	High	High	High	1	1	Phospho [T955]	0		Deamidated [Q397]; Phospho [T955]
High	Master Protein	A0A072VF81	Plant/F18O14-17 protein OS=Medicago truncatula GN=MTR_1g022045 PE=4 SV=1	0	66.471	18	12	37	12	649	71.9	7.33	135.21	12	High	High	Not Found	High	High	High	High	Not Found	Medium	High	Not Found	High	High	High	High	High	High	High	Not Found	High	Not Found	High	High	Not Found	1	0		0
High	Master Protein	A0A072UP99	LRR receptor-like kinase OS=Medicago truncatula GN=MTR_4g095012 PE=4 SV=1	0	112.007	19	14	72	12	819	91.2	6.58	265.17	14	Not Found	Not Found	High	High	High	High	High	High	Not Found	Not Found	High	High	High	High	High	High	Not Found	Not Found	Not Found	High	High	High	High	High	1	0		0
High	Master Protein	A0A072TEX8	Glycoside hydrolase family 18 protein OS=Medicago truncatula GN=MTR_0443s0040 PE=3 SV=1	0	67.306	33	12	43	12	310	36	5.78	149.56	12	Not Found	Not Found	Not Found	Not Found	High	High	High	High	Not Found	Not Found	High	High	High	Medium	High	High	Not Found	Not Found	Not Found	High	High	High	High	High	1	0		0
High	Master Protein	G7J7R2	Dehydrin OS=Medicago truncatula GN=MTR_3g117290 PE=2 SV=1	0	116.788	59	12	65	12	209	23.5	5.8	285.65	12	High	High	High	High	Not Found	High	High	High	High	High	High	High	Not Found	High	High	High	High	High	High	High	High	Medium	High	High	1	0		0
High	Master Protein	B7FIY3	General regulatory factor 2 OS=Medicago truncatula GN=MTR_5g064580 PE=2 SV=1	0	130.242	69	18	91	12	260	29.2	4.78	270.92	18	Not Found	High	High	High	High	High	High	Not Found	High	High	High	High	High	Not Found	Not Found	Not Found	Not Found	High	High	High	High	Not Found	Not Found	Not Found	1	0		0		Carboxymethyl [K108]
High	Master Protein	A0A072TUR1	6-phosphogluconate dehydrogenase, decarboxylating OS=Medicago truncatula GN=MTR_8g099185 PE=3 SV=1	0	69.374	27	14	40	12	495	53.8	6	116.41	14	Not Found	High	High	High	Not Found	Medium	High	High	Not Found	Not Found	High	High	High	Medium	High	High	Not Found	Not Found	High	Not Found	High	High	High	High	1	0		0
High	Master Protein	A0A072U3N8	Chalcone-flavanone isomerase family protein OS=Medicago truncatula GN=MTR_7g094980 PE=4 SV=1	0	73.651	45	12	38	12	283	31.6	9.22	142.67	12	Not Found	High	High	High	High	High	High	High	Not Found	High	High	Not Found	High	High	High	Not Found	Not Found	High	High	High	High	High	High	High	1	0		0
High	Master Protein	A0A072VBF8	Transmembrane protein, putative OS=Medicago truncatula GN=MTR_3g093690 PE=4 SV=1	0	114.721	33	12	45	12	349	39	9.76	199.6	12	Not Found	High	High	High	High	High	High	High	Not Found	Not Found	High	High	High	High	High	High	Not Found	Not Found	High	High	High	High	High	High	1	0		0		Carboxymethyl [K310]; Deamidated [R326]
High	Master Protein	I3SSW0	Plastid lipid-associated protein OS=Medicago truncatula GN=MTR_1g054070 PE=2 SV=1	0	58.21	40	12	46	12	297	32.4	5.82	158.97	12	Not Found	Not Found	High	High	High	High	High	High	High	High	High	High	High	High	High	High	Not Found	Not Found	High	High	High	High	High	High	1	0		0
High	Master Protein	G7IRL5	Serine/threonine-protein kinase OS=Medicago truncatula GN=MTR_2g089360 PE=3 SV=1	0	109.213	20	13	35	12	829	92.3	6.74	145.38	13	Not Found	High	Not Found	High	High	Not Found	High	High	Not Found	High	Not Found	High	High	High	Not Found	High	Not Found	High	Not Found	High	High	Not Found	High	High	1	0		0		Deamidated [R536]
High	Master Protein	G7L6M3	Uncharacterized protein OS=Medicago truncatula GN=MTR_7g078820 PE=4 SV=1	0	82.243	15	12	23	12	1057	115.8	6.06	92.3	12	Not Found	High	High	High	Not Found	Not Found	High	Not Found	Not Found	High	High	High	Medium	Not Found	Not Found	Not Found	Not Found	High	High	High	High	High	Not Found	Not Found	1	0		0
High	Master Protein	G7J2P6	Cleft lip and palate transmembrane protein OS=Medicago truncatula GN=MTR_3g098210 PE=4 SV=1	0	140.081	20	12	41	12	591	67.7	5.77	229.63	12	Not Found	High	High	High	High	High	High	High	Not Found	Not Found	High	High	High	High	High	High	Not Found	Not Found	Not Found	High	High	High	High	High	1	0		0
High	Master Protein	G7LD98	Guanine nucleotide-binding protein beta subunit-like protein OS=Medicago truncatula GN=MTR_8g106790 PE=4 SV=1	0	82.028	38	12	38	12	325	35.7	7.44	141.39	12	High	Not Found	High	High	High	High	High	High	High	Not Found	Not Found	High	High	High	Not Found	High	High	Not Found	Not Found	High	High	High	High	High	1	0		0
High	Master Protein	A0A072UCJ4	Calcium-transporting ATPase OS=Medicago truncatula GN=MTR_5g015590 PE=3 SV=1	0	122.872	25	17	84	12	787	85.3	6.06	321.52	17	High	High	High	High	High	High	High	High	High	High	High	High	High	High	High	High	High	High	High	High	High	High	High	High	1	0		0
High	Master Protein	A0A072U8G7	Serine/threonine-protein kinase OS=Medicago truncatula GN=MTR_6g043510 PE=3 SV=1	0	83.858	19	13	47	12	837	90.5	7.31	168.66	13	Not Found	High	High	High	High	High	High	High	High	High	Not Found	High	High	Not Found	High	High	Not Found	High	Not Found	Not Found	High	High	High	High	1	0		0
High	Master Protein	G7K315	Dihydropyrimidinase OS=Medicago truncatula GN=MTR_5g089280 PE=4 SV=1	0	61.458	19	13	43	12	542	59.1	6.49	127.43	13	Not Found	High	High	High	High	High	High	High	Not Found	High	High	High	High	High	High	High	Not Found	Not Found	High	High	High	High	Not Found	High	1	0		0
High	Master Protein	G7JTZ0	Glyoxysomal malate dehydrogenase OS=Medicago truncatula GN=MTR_4g092690 PE=3 SV=1	0	97.484	36	13	94	12	356	37.3	7.43	346.14	13	Not Found	High	High	High	High	High	High	High	Not Found	Not Found	High	High	High	High	High	High	Not Found	Not Found	High	High	High	High	High	High	1	0		0		Deamidated [Q251]
High	Master Protein	G7J4Q1	Endoglucanase OS=Medicago truncatula GN=MTR_3g113720 PE=3 SV=2	0	62.699	24	12	33	12	529	57.8	6.13	119.08	12	Not Found	High	Not Found	Not Found	High	High	High	High	Not Found	Not Found	High	Not Found	Not Found	High	High	High	Not Found	Not Found	Not Found	Not Found	High	High	High	High	1	0		0
High	Master Protein	A0A072TJ20	Succinate dehydrogenase [ubiquinone] iron-sulfur subunit, mitochondrial OS=Medicago truncatula GN=MTR_0018s0260 PE=3 SV=1	0	56.261	30	12	40	12	278	31.3	8.43	103.63	12	High	High	High	High	High	High	High	Not Found	High	High	High	High	High	High	High	High	Not Found	High	Not Found	High	High	High	High	Medium	1	0		0
High	Master Protein	G7L4P7	Uncharacterized protein OS=Medicago truncatula GN=MTR_7g077860 PE=4 SV=1	0	107.001	53	12	29	12	317	35.2	4.72	150.6	12	High	High	High	High	High	High	High	High	Not Found	High	High	High	Not Found	High	Not Found	High	Not Found	High	High	High	High	High	Not Found	Not Found	1	0		0
High	Master Protein	A0A072V758	Acyl-CoA dehydrogenase family protein OS=Medicago truncatula GN=MTR_2g435800 PE=4 SV=1	0	89.541	22	12	31	12	565	63.1	6.8	126.56	12	Not Found	High	High	High	High	Not Found	High	High	Not Found	Not Found	High	High	Not Found	High	High	High	Not Found	High	High	High	High	High	High	High	1	0		0
High	Master Protein	A0A072UR30	Carbohydrate-binding protein of the ER protein OS=Medicago truncatula GN=MTR_4g095018 PE=4 SV=1	0	73.458	23	13	47	12	593	66.2	7.18	144.01	13	Not Found	High	High	High	High	High	High	High	Not Found	High	High	Not Found	High	High	High	Not Found	Not Found	Not Found	High	Not Found	High	High	High	High	1	0		0
High	Master Protein	G7JH62	50S ribosomal protein L2 OS=Medicago truncatula GN=MTR_4g051430 PE=3 SV=1	0	85.831	32	16	95	12	382	43.5	10.71	291.87	16	Not Found	High	High	High	High	High	High	High	Not Found	High	High	High	High	High	High	High	Not Found	High	Not Found	High	High	High	High	High	1	0		0
High	Master Protein	A0A072U6W4	Feronia receptor-like kinase OS=Medicago truncatula GN=MTR_6g015805 PE=4 SV=1	0	95.646	22	17	50	12	900	100.2	7.24	202.17	17	Not Found	Not Found	High	High	High	High	High	High	Not Found	Not Found	High	High	High	High	High	High	Not Found	Not Found	High	Not Found	High	High	Not Found	High	1	0		0
High	Master Protein	G7JIK6	Transmembrane protein, putative OS=Medicago truncatula GN=MTR_4g071010 PE=4 SV=1	0	89.274	33	12	27	12	442	49.2	8.47	110.47	12	Not Found	High	High	Not Found	Not Found	High	High	High	High	High	Not Found	High	Not Found	High	Not Found	Not Found	Not Found	High	Not Found	High	Not Found	High	High	High	1	0		0		Deamidated [Q391]
High	Master Protein	G7LHB4	MACPF domain protein OS=Medicago truncatula GN=MTR_8g097210 PE=4 SV=1	0	68.79	23	12	29	12	619	68.8	9.22	119.63	12	Not Found	High	High	High	High	High	High	High	Not Found	Not Found	Not Found	High	High	High	High	High	Not Found	Not Found	Not Found	High	High	Not Found	High	High	1	0		0
High	Master Protein	A0A072UUL4	Non-lysosomal glucosylceramidase OS=Medicago truncatula GN=MTR_4g134760 PE=3 SV=1	0	64.793	16	12	29	12	960	107.5	6.3	101.07	12	Not Found	High	High	Not Found	High	High	High	High	Not Found	Not Found	High	Not Found	Not Found	High	High	High	Not Found	Not Found	High	Not Found	Not Found	High	High	High	1	0		0
High	Master Protein	G7K4T4	Fructose-bisphosphate aldolase OS=Medicago truncatula GN=MTR_5g096670 PE=2 SV=1	0	142.424	48	15	74	12	357	38.3	6.15	327.11	15	Not Found	High	High	High	High	High	High	High	Not Found	High	Not Found	High	High	High	High	High	Not Found	High	High	High	High	High	High	High	1	0		0		Deamidated [Q121]
High	Master Protein	I3SKQ8	60S ribosomal protein L24-2 OS=Medicago truncatula GN=MTR_7g103320 PE=2 SV=1	0	63.701	37	12	105	12	163	18.5	10.71	381.44	12	High	High	High	High	High	High	High	High	High	High	High	High	High	High	High	High	High	High	High	High	High	High	High	High	1	0		0
High	Master Protein	G7II77	Pti1-like kinase OS=Medicago truncatula GN=MTR_2g103950 PE=3 SV=1	0	105.087	31	13	81	12	367	41	6.25	310.31	13	Not Found	High	High	High	High	High	High	High	Not Found	High	High	High	High	High	High	High	Not Found	High	High	High	High	High	High	High	1	0		0
High	Master Protein	G7JLX3	Transmembrane protein, putative OS=Medicago truncatula GN=MTR_4g015010 PE=4 SV=1	0	134.465	33	12	49	12	275	31	4.93	275.68	12	Not Found	High	High	High	High	Not Found	Not Found	Not Found	Not Found	High	High	High	High	High	Not Found	Not Found	Not Found	High	High	High	High	High	High	Not Found	1	0		0
High	Master Protein	G7KEZ1	Isoflavone reductase-like protein OS=Medicago truncatula GN=MTR_5g020800 PE=4 SV=1	0	78.911	45	13	39	12	318	35.4	5.58	139.4	13	Not Found	Not Found	High	High	High	Not Found	Not Found	High	Not Found	Not Found	High	High	Not Found	High	High	High	High	Not Found	High	High	High	High	High	Not Found	1	0		0
High	Master Protein	G7JXE3	E3 ubiquitin-protein ligase HOS1 OS=Medicago truncatula GN=MTR_5g012940 PE=4 SV=2	0	89.771	18	12	27	12	960	108.4	6.6	125.18	12	Not Found	Not Found	High	High	High	High	High	High	Not Found	High	High	High	Not Found	High	High	High	Not Found	Not Found	High	High	Not Found	High	Not Found	Not Found	1	0		0
High	Master Protein	G7K6A4	ATP-dependent zinc metalloprotease FTSH protein OS=Medicago truncatula GN=MTR_5g069780 PE=3 SV=1	0	114.646	29	17	36	12	793	86.3	7.28	154.62	17	High	High	High	High	High	Not Found	Not Found	Not Found	High	Not Found	High	Not Found	High	Not Found	High	High	Not Found	Not Found	High	High	Not Found	High	Not Found	High	1	0		0
High	Master Protein	A0A072UR85	DUF21 domain plant protein OS=Medicago truncatula GN=MTR_4g117360 PE=4 SV=1	0	162.547	40	18	75	12	492	53.6	6.04	300.42	18	High	High	High	High	High	High	High	High	High	High	High	High	High	High	High	High	High	High	Not Found	High	High	High	High	High	1	0		0		Deamidated [R188; R492]
High	Master Protein	I3SSE5	Oxygen-evolving enhancer protein OS=Medicago truncatula GN=MTR_8g005175 PE=2 SV=1	0	107.592	51	12	129	12	232	24.9	9.66	501.62	12	Not Found	High	High	High	High	High	High	High	Not Found	Not Found	High	High	High	High	High	High	Not Found	High	High	High	High	High	High	High	1	0		0
High	Master Protein	A0A072U4R3	Calcium-transporting ATPase OS=Medicago truncatula GN=MTR_8g090125 PE=3 SV=1	0	76.859	12	14	65	12	992	108.1	5.41	221.58	14	Not Found	Not Found	High	High	High	High	High	High	Not Found	Not Found	High	High	High	High	High	High	Not Found	Not Found	High	Not Found	High	High	High	High	1	0		0		Deamidated [R79]
High	Master Protein	A0A072UJ57	Pyridine nucleotide-disulfide oxidoreductase family protein OS=Medicago truncatula GN=MTR_4g051645 PE=4 SV=1	0	111.966	43	12	44	12	363	40.3	9.04	198.68	12	Not Found	High	High	High	High	High	High	High	Not Found	High	High	High	Not Found	High	High	High	Not Found	High	High	High	Not Found	High	High	High	1	0		0
High	Master Protein	Q2HW22	Cupin, RmlC-type OS=Medicago truncatula GN=MTR_7g079730 PE=4 SV=1	0	300.747	68	32	193	12	464	53.1	5.53	758.85	32	Not Found	High	High	High	Not Found	Not Found	High	High	Not Found	High	High	High	High	High	High	Not Found	Not Found	High	High	Not Found	High	High	High	High	1	0		0		Deamidated [R54; Q70; R194; Q205; R307; Q343; Q344; Q439]
High	Master Protein	Q8GV76	Auxin efflux carrier component OS=Medicago truncatula GN=PIN1 PE=3 SV=1	0	125.754	33	11	49	11	659	71.9	7.44	295.11	11	Not Found	High	High	High	High	High	High	High	Not Found	High	Not Found	High	High	High	High	High	High	High	Not Found	High	High	High	High	High	1	1	Phospho [S302]	0		Carboxymethyl [K449]; Deamidated [Q439]; Phospho [S302]
High	Master Protein	G7KBI3	Glucose-6-phosphate isomerase OS=Medicago truncatula GN=MTR_5g065880 PE=3 SV=2	0	53.936	20	11	22	11	617	68.1	5.8	62.55	11	Not Found	Medium	Not Found	High	High	High	High	Not Found	Not Found	Medium	High	High	Not Found	High	Not Found	Not Found	Not Found	Medium	High	High	High	High	Not Found	Not Found	1	0		0
High	Master Protein	G7K3F2	LRR receptor-like kinase OS=Medicago truncatula GN=MTR_5g091950 PE=4 SV=2	0	61.085	15	13	33	11	1022	113.1	8.46	98.16	13	Not Found	Not Found	Not Found	Not Found	High	High	High	High	Not Found	Not Found	High	High	High	Not Found	High	High	Not Found	Not Found	Not Found	High	High	High	Not Found	High	1	0		0
High	Master Protein	G7J6K3	Guanine nucleotide-binding protein beta subunit-like protein OS=Medicago truncatula GN=MTR_3g116500 PE=4 SV=1	0	97.533	32	11	63	11	378	41	7.62	266.9	11	Not Found	High	High	High	High	High	High	High	Not Found	Not Found	High	High	High	High	High	High	Not Found	Not Found	High	High	High	High	High	High	1	1	Phospho [S30]	0		Phospho [S30]
High	Master Protein	G7JZW6	Cytochrome P450 family ent-kaurenoic acid oxidase OS=Medicago truncatula GN=MTR_5g014240 PE=3 SV=1	0	61.474	24	11	37	11	490	56.5	8.98	123.62	11	Not Found	Not Found	High	High	High	High	High	High	Not Found	Not Found	High	High	High	High	High	High	Not Found	Not Found	Not Found	High	High	High	High	High	1	0		0
High	Master Protein	A0A072V2Q8	Uncharacterized protein OS=Medicago truncatula GN=MTR_3g108780 PE=4 SV=1	0	79.787	31	11	30	11	606	65.1	7.02	148.62	11	Not Found	High	High	High	High	High	High	High	Not Found	Not Found	High	High	High	High	Not Found	High	Not Found	Not Found	High	High	High	High	Not Found	High	1	0		0
High	Master Protein	G7KXR2	Transaldolase family protein OS=Medicago truncatula GN=MTR_7g006560 PE=3 SV=1	0	72.134	29	11	22	11	443	48.5	6.6	97.22	11	High	High	Not Found	High	Not Found	Not Found	High	Not Found	High	High	High	High	High	High	Not Found	High	High	Not Found	High	High	High	High	Not Found	Not Found	1	0		0		Deamidated [Q411]
High	Master Protein	I3SYR8	Adenine nucleotide alpha hydrolase superfamily protein OS=Medicago truncatula GN=MTR_4g064933 PE=2 SV=1	0	129.798	74	12	99	11	164	17.8	6.95	444.51	12	Not Found	High	High	High	High	High	High	High	Not Found	High	High	High	High	High	High	Not Found	High	High	Not Found	High	High	High	High	High	1	0		0		Deamidated [R49; Q74]
High	Master Protein	A0A072U597	UDP-D-glucose/UDP-D-galactose 4-epimerase OS=Medicago truncatula GN=MTR_8g096880 PE=3 SV=1	0	81.084	36	11	32	11	323	35.6	7.83	125.41	11	Not Found	High	High	Not Found	High	High	High	Not Found	Not Found	High	High	Not Found	High	Not Found	Not Found	High	Not Found	High	High	Not Found	High	High	Not Found	High	1	0		0
High	Master Protein	B7FLU4	NOP56-like pre RNA processing ribonucleoprotein OS=Medicago truncatula GN=MTR_4g103790 PE=2 SV=1	0	90.695	28	11	27	11	524	58.6	8.66	132.92	11	High	High	High	High	Not Found	High	Not Found	High	Not Found	High	High	High	Not Found	Not Found	High	High	Not Found	Not Found	High	High	High	Not Found	High	High	1	0		0
High	Master Protein	G7JRA5	SOUL heme-binding family protein OS=Medicago truncatula GN=MTR_4g019150 PE=4 SV=1	0	75.607	60	12	54	11	202	22.5	5.85	191.89	12	High	High	High	High	High	High	High	High	Not Found	High	High	High	High	High	High	High	High	High	High	High	High	High	High	High	1	0		0
High	Master Protein	G7KS97	ADP/ATP carrier protein OS=Medicago truncatula GN=MTR_7g068340 PE=3 SV=2	0	47.125	28	13	30	11	380	41.7	9.57	83.39	13	Not Found	High	High	High	High	Not Found	High	Not Found	Not Found	Not Found	Medium	High	High	High	High	High	Not Found	Not Found	Not Found	High	Not Found	High	High	High	1	0		0
High	Master Protein	G7L831	TCP-1/cpn60 chaperonin family protein OS=Medicago truncatula GN=MTR_8g088270 PE=3 SV=1	0	54.825	19	11	33	11	544	58.8	6.16	95.8	11	Not Found	Not Found	Not Found	Not Found	High	High	High	High	Not Found	Not Found	High	High	High	High	High	High	Not Found	Not Found	High	High	High	High	High	High	1	0		0
High	Master Protein	G7KAM5	Substrate carrier family protein OS=Medicago truncatula GN=MTR_5g009500 PE=3 SV=2	0	74.735	42	14	47	11	346	37.2	9.51	137.43	14	Not Found	Not Found	Not Found	High	High	High	High	High	Not Found	High	Not Found	High	High	High	Not Found	High	Not Found	Not Found	Not Found	High	High	High	High	High	1	0		0
High	Master Protein	G7KRL1	ER membrane protein complex subunit-like protein, putative OS=Medicago truncatula GN=MTR_7g080350 PE=4 SV=1	0	67.39	32	11	49	11	299	33.2	7.05	214.75	11	Not Found	High	High	High	High	High	High	High	High	High	High	High	High	High	High	High	High	High	High	High	High	Not Found	High	High	1	0		0
High	Master Protein	A0A072VEI7	Porin/voltage-dependent anion-selective channel protein OS=Medicago truncatula GN=MTR_1g018205 PE=4 SV=1	0	84.526	48	11	93	11	277	29.7	8.97	376.16	11	Not Found	High	High	High	High	High	High	High	Not Found	Not Found	Not Found	High	High	High	High	High	Not Found	Not Found	Not Found	High	High	High	High	High	1	0		0
High	Master Protein	G7L5N4	Cysteine synthase OS=Medicago truncatula GN=MTR_7g078070 PE=3 SV=1	0	45.53	26	11	29	11	380	40.9	8.19	83.71	11	Not Found	High	High	High	High	Not Found	High	Not Found	Not Found	Not Found	High	High	High	High	High	High	Not Found	Not Found	High	High	High	Not Found	High	High	1	0		0
High	Master Protein	G7L7M3	Inter-alpha-trypsin inhibitor heavy chain-like protein OS=Medicago truncatula GN=MTR_8g021230 PE=4 SV=2	0	50.334	14	11	25	11	753	83.4	6.09	77.11	11	High	Not Found	High	High	High	High	High	Not Found	High	Not Found	High	High	High	Not Found	High	High	High	Not Found	High	High	High	High	High	High	1	1	Phospho [S647]	0		Phospho [S647]
High	Master Protein	Q0GXX6	Auxin conjugate hydrolase OS=Medicago truncatula GN=IAR32 PE=2 SV=1	0	112.135	33	14	41	11	447	49	6.35	183.41	14	Not Found	High	High	Not Found	High	Not Found	High	High	Not Found	High	High	Not Found	Not Found	High	High	High	Not Found	High	Not Found	High	Not Found	High	High	High	1	0		0		Deamidated [Q172]
High	Master Protein	A0A072U0M2	ICE-like protease (Caspase) p20 domain protein OS=Medicago truncatula GN=MTR_8g447080 PE=4 SV=1	0	89.672	37	11	24	11	412	44.9	5.11	103.15	11	Not Found	High	Not Found	High	High	High	High	High	Not Found	High	Not Found	Not Found	High	High	High	Not Found	Not Found	High	Not Found	Not Found	Not Found	High	High	Not Found	1	0		0
High	Master Protein	G7KRJ7	DUF2358 family protein OS=Medicago truncatula GN=MTR_7g080220 PE=4 SV=1	0	110.76	42	11	64	11	308	33.9	6.93	286.12	11	Not Found	High	High	Not Found	High	High	High	High	Not Found	High	High	High	High	High	High	High	Not Found	High	High	High	High	High	High	High	1	0		0		Deamidated [R134]
High	Master Protein	G7K0X0	Vacuolar-sorting receptor-like protein OS=Medicago truncatula GN=MTR_5g005100 PE=4 SV=1	0	75.809	20	12	69	11	622	68.7	6.05	253.07	12	Not Found	High	High	High	High	High	High	High	Not Found	High	Not Found	High	High	High	High	High	Not Found	High	High	High	High	High	High	High	1	0		0
High	Master Protein	G7ID86	Long chain acyl-CoA synthetase 7, peroxisomal protein OS=Medicago truncatula GN=MTR_1g104810 PE=4 SV=1	0	57.179	20	11	31	11	630	69.7	7.53	103.8	11	Not Found	High	High	High	Not Found	Not Found	High	High	Not Found	Medium	High	Not Found	Not Found	High	High	Not Found	Not Found	High	High	High	High	High	High	High	1	0		0
High	Master Protein	A0A072TZI8	GPI transamidase component PIG-S, related protein OS=Medicago truncatula GN=MTR_7g056117 PE=4 SV=1	0	55.788	21	11	18	11	590	66.2	5.72	65.57	11	Not Found	High	High	High	Not Found	Not Found	Not Found	Not Found	Not Found	High	High	Not Found	Not Found	High	Not Found	Not Found	High	High	High	Not Found	High	Medium	Not Found	High	1	0		0
High	Master Protein	G7IVB7	50S ribosomal protein L5P OS=Medicago truncatula GN=MTR_3g007700 PE=2 SV=1	0	60.692	36	11	76	11	182	20.8	9.96	232.03	11	High	High	High	High	High	High	High	High	High	High	High	High	High	High	High	High	High	High	High	High	High	High	High	High	1	0		0
High	Master Protein	Q2HTQ3	Granulin; Peptidase C1A, papain OS=Medicago truncatula GN=MTR_1g018840 PE=3 SV=1	0	116.074	28	12	102	11	474	52.2	6.28	415.8	12	Not Found	High	High	High	High	High	High	High	Not Found	Not Found	High	High	High	High	High	High	Not Found	Not Found	High	High	High	High	High	High	1	1	Phospho [T252]	0		Carboxymethyl [K318]; Deamidated [Q268]; Phospho [T252]
High	Master Protein	A0A072UNX6	Nuclear matrix constituent-like protein, putative OS=Medicago truncatula GN=MTR_4g097580 PE=4 SV=1	0	44.866	12	11	23	11	1055	121.8	5.69	84.84	11	High	High	High	Not Found	Not Found	High	High	Not Found	High	Not Found	High	Medium	Not Found	Not Found	Not Found	Not Found	High	Not Found	High	Not Found	Not Found	High	High	Not Found	1	0		0
High	Master Protein	G7I4Z9	Transmembrane amino acid transporter family protein OS=Medicago truncatula GN=MTR_1g094620 PE=4 SV=2	0	127.346	16	11	66	11	548	59.1	6.24	284.58	11	Not Found	Not Found	Not Found	High	High	High	High	High	Not Found	Not Found	Not Found	High	High	High	High	High	Not Found	Not Found	Not Found	High	High	High	High	High	1	5	Phospho [S48; S86; T98; S122; S123]	0		Phospho [S48; S86; T98; S122; S123]
High	Master Protein	G7L9X4	K+-H+ exchange-like protein OS=Medicago truncatula GN=MTR_8g023500 PE=4 SV=2	0	70.086	45	11	41	11	277	31.5	9.14	150.79	11	Not Found	High	High	High	High	High	High	High	Not Found	Not Found	Not Found	High	High	High	High	High	Not Found	High	Not Found	High	High	High	High	High	1	0		0
High	Master Protein	G7KGT1	Ribulose bisphosphate carboxylase/oxygenase activase OS=Medicago truncatula GN=MTR_5g080450 PE=4 SV=1	0	390.304	58	37	350	11	476	52.3	6.46	1332.2	37	High	High	High	High	High	High	High	High	Not Found	High	High	Not Found	Not Found	High	High	High	High	High	High	High	Not Found	Not Found	High	High	1	1	Phospho [S173]	0		Carboxymethyl [K318]; Deamidated [Q175; R212; Q403; Q405; Q428]; Phospho [S173]
High	Master Protein	G7I4F8	Succinate dehydrogenase OS=Medicago truncatula GN=MTR_1g019810 PE=4 SV=2	0	147.526	53	11	65	11	238	26.2	6.3	352.07	11	Not Found	Not Found	High	High	High	High	High	High	High	Not Found	High	High	High	High	High	High	Not Found	Not Found	High	High	High	High	High	High	1	0		0
High	Master Protein	G7LCN2	Plant/T32A16-60 protein OS=Medicago truncatula GN=MTR_8g032260 PE=2 SV=1	0	94.082	45	11	55	11	244	27	8.57	228.32	11	High	High	High	High	High	High	High	High	High	High	Not Found	High	High	High	High	High	High	Not Found	Not Found	Not Found	High	High	High	High	1	1	Phospho [S93]	0		Phospho [S93]
High	Master Protein	I3S6I7	Vacuolar (H+)-ATPase G subunit OS=Medicago truncatula GN=MTR_1g064540 PE=2 SV=1	0	82.894	71	11	54	11	112	12.4	8.37	211.99	11	High	High	Not Found	High	High	High	High	High	High	High	High	High	High	Not Found	High	High	High	High	High	High	High	High	High	High	1	0		0
High	Master Protein	G7LFP6	CBS/octicosapeptide/phox/Bemp1 (PB1) domain protein OS=Medicago truncatula GN=MTR_8g094780 PE=4 SV=1	0	153.636	37	16	61	11	534	57.6	7.34	311.98	16	Not Found	High	High	High	High	High	High	High	Not Found	Not Found	High	Not Found	High	Not Found	High	High	Not Found	Not Found	High	Not Found	High	Not Found	High	High	1	0		0
High	Master Protein	G7K0M1	Fasciclin-like arabinogalactan protein OS=Medicago truncatula GN=MTR_5g098420 PE=4 SV=1	0	189.228	37	11	136	11	421	45.1	6.34	748.43	11	High	High	High	High	High	High	High	High	Not Found	Not Found	High	High	High	High	High	High	Not Found	High	High	High	High	High	High	High	1	1	Phospho [T294]	0		Deamidated [Q296]; Phospho [T294]
High	Master Protein	A0A072VNM9	GDP-D-mannose-3,5-epimerase OS=Medicago truncatula GN=MTR_1g080950 PE=4 SV=1	0	105.622	37	15	45	11	416	47.1	6.47	184.44	15	Not Found	High	High	High	High	High	High	High	Not Found	Not Found	Not Found	Not Found	Not Found	Not Found	High	High	Not Found	Not Found	Not Found	High	High	High	High	High	1	0		0
High	Master Protein	A0A072U5S5	Pro-resilin, putative OS=Medicago truncatula GN=MTR_6g012780 PE=4 SV=1	0	105.087	28	11	23	11	390	43	4.82	129.4	11	High	High	High	Not Found	Not Found	Not Found	Not Found	Not Found	Not Found	High	High	Not Found	Not Found	Not Found	Not Found	Not Found	Not Found	High	High	Not Found	Not Found	Not Found	Not Found	Not Found	1	0		0
High	Master Protein	G7JNS2	NAD-dependent aldehyde dehydrogenase family protein OS=Medicago truncatula GN=MTR_4g106510 PE=3 SV=1	0	77.94	31	12	30	11	503	54.3	5.43	117.97	12	Not Found	Not Found	High	High	High	High	High	Not Found	Not Found	Not Found	High	High	Not Found	High	High	High	High	Not Found	High	Not Found	High	High	High	High	1	0		0
High	Master Protein	G4W9I5	Glutamate 1-semialdehyde aminotransferase OS=Medicago truncatula GN=GSA PE=2 SV=1	0	73.119	29	11	37	11	468	49.7	6.57	158.19	11	High	Not Found	High	High	High	High	High	High	High	Not Found	Not Found	High	High	High	High	High	Not Found	Not Found	Not Found	High	High	High	High	High	1	0		0
High	Master Protein	A0A072UPJ4	Cytochrome P450 family 71 protein OS=Medicago truncatula GN=MTR_4g104640 PE=3 SV=1	0	64.22	20	11	50	11	521	59.7	7.46	173.35	11	Not Found	High	High	High	Not Found	High	High	High	Not Found	Not Found	High	High	High	High	High	High	Not Found	High	High	High	High	High	High	High	1	0		0
High	Master Protein	A0A072UXK7	NAD(P)H dehydrogenase B2 OS=Medicago truncatula GN=MTR_3g464380 PE=4 SV=1	0	62.025	27	11	31	11	504	56	9.01	135.55	11	Not Found	High	Not Found	High	High	High	High	High	High	Not Found	High	High	High	Medium	High	High	Not Found	High	High	High	Not Found	Not Found	High	High	1	0		0
High	Master Protein	A0A072UXI9	Serine/threonine-protein phosphatase OS=Medicago truncatula GN=MTR_3g452710 PE=4 SV=1	0	44.647	23	11	15	11	482	54.2	6.65	46.99	11	Not Found	Not Found	High	High	Not Found	Not Found	Not Found	Not Found	High	Not Found	High	High	Not Found	High	Not Found	High	Medium	Not Found	High	High	Not Found	High	Not Found	High	1	0		0
High	Master Protein	A0A072V8W3	Cytosol aminopeptidase family protein OS=Medicago truncatula GN=MTR_2g460760 PE=4 SV=1	0	59.192	41	11	30	11	358	37.6	9.42	90.39	11	Not Found	High	High	High	High	High	High	High	Not Found	Not Found	Not Found	High	High	High	Not Found	High	Not Found	Not Found	Not Found	High	High	High	High	Not Found	1	0		0
High	Master Protein	G7LIZ7	Lipoxygenase OS=Medicago truncatula GN=MTR_8g018730 PE=3 SV=2	0	174.368	38	27	151	11	864	96.9	6.21	536.85	27	Not Found	High	High	High	High	High	High	High	Not Found	High	High	High	Not Found	High	Not Found	Not Found	Not Found	Not Found	High	High	High	High	High	High	1	0		0		Deamidated [Q839]
High	Master Protein	G7J5U6	26S proteasome non-ATPase regulatory subunit 3 OS=Medicago truncatula GN=MTR_3g114480 PE=4 SV=1	0	62.649	25	11	27	11	490	55.7	8.57	111.37	11	Not Found	Not Found	High	High	High	High	High	High	Not Found	Not Found	High	High	High	High	Not Found	High	Not Found	Not Found	High	High	High	High	Not Found	High	1	0		0		Deamidated [Q255]
High	Master Protein	G7IAZ3	TMPIT-like protein OS=Medicago truncatula GN=MTR_1g116510 PE=4 SV=1	0	55.253	24	11	22	11	361	41.3	9.35	82.6	11	Not Found	High	High	High	Not Found	Not Found	Not Found	High	Not Found	High	High	High	High	Not Found	Not Found	Not Found	Not Found	Not Found	High	High	High	Not Found	High	Not Found	1	0		0
High	Master Protein	G7KCY5	DEAD-box ATP-dependent RNA helicase-like protein OS=Medicago truncatula GN=MTR_5g090120 PE=4 SV=2	0	58.84	28	12	31	11	590	62.3	9.47	79.13	12	Not Found	Not Found	Not Found	High	Not Found	High	High	Not Found	Not Found	Not Found	Medium	High	Not Found	High	High	High	Not Found	Not Found	Not Found	Medium	Not Found	High	High	High	1	0		0		Deamidated [R587]
High	Master Protein	G7JQ35	Pti1-like kinase OS=Medicago truncatula GN=MTR_4g123870 PE=4 SV=1	0	116.727	44	14	90	11	393	43.5	8.95	342.66	14	Not Found	High	High	High	High	High	High	High	Not Found	Not Found	High	High	High	High	High	High	Not Found	Not Found	High	High	High	High	High	High	1	0		0		Deamidated [R186]
High	Master Protein	G7I3Y0	p-loop nucleoside triphosphate hydrolase superfamily protein OS=Medicago truncatula GN=MTR_1g075200 PE=4 SV=1	0	70.896	21	11	38	11	520	58.2	7.94	149.68	11	Not Found	Not Found	High	High	High	High	High	Not Found	Not Found	High	High	High	High	High	High	High	Not Found	Not Found	High	High	High	High	High	High	1	0		0
High	Master Protein	G7JCU3	Peroxidase OS=Medicago truncatula GN=MTR_4g095450 PE=3 SV=1	0	92.259	32	11	63	11	323	35.4	8.92	242.55	11	Not Found	High	High	High	High	High	High	High	Not Found	Not Found	High	High	High	High	High	High	Not Found	Not Found	High	High	High	High	High	High	1	0		0
High	Master Protein	Q38JC8	Temperature-induced lipocalin OS=Medicago truncatula GN=TIL PE=2 SV=1	0	100.284	49	13	51	11	184	21.4	6.55	195.86	13	High	Not Found	High	High	High	Not Found	High	High	High	High	High	High	High	High	High	High	Not Found	High	High	High	High	High	High	High	1	0		0
High	Master Protein	Q8GSL6	Farnesyl-diphosphate farnesyltransferase OS=Medicago truncatula GN=sqs1 PE=2 SV=1	0	66.117	22	11	42	11	413	47	7.64	132.51	11	Not Found	High	High	High	High	High	High	High	Not Found	Not Found	Not Found	High	High	Not Found	Not Found	High	Not Found	High	High	High	High	High	High	High	1	0		0
High	Master Protein	B7FJX5	60S ribosomal protein L5-2 OS=Medicago truncatula GN=MTR_8g028125 PE=2 SV=1	0	207.639	61	23	190	11	302	34.5	9.04	800.71	23	Not Found	High	High	High	High	High	High	High	High	Not Found	High	High	High	High	High	High	High	Not Found	High	High	High	High	High	High	1	0		0
High	Master Protein	G7L523	Plant/F21F14-40 protein OS=Medicago truncatula GN=MTR_7g117970 PE=4 SV=1	0	93.252	25	11	145	11	265	29.3	9.73	585.32	11	High	High	High	High	High	High	High	High	High	High	High	High	High	High	High	High	High	High	High	High	High	High	High	High	1	0		0		Deamidated [Q114; Q149]
High	Master Protein	Q2HT97	Heat shock cognate 70 kDa protein OS=Medicago truncatula GN=MTR_7g099680 PE=3 SV=1	0	349.216	59	38	285	11	649	71	5.22	1301.89	38	High	High	High	High	High	High	High	High	Not Found	Not Found	Not Found	High	High	High	High	High	Not Found	Not Found	High	High	High	High	High	High	1	0		0		Deamidated [Q158; R307]; Carboxymethyl [K367]
High	Master Protein	G7IM71	RAB GTPase-like protein A1D OS=Medicago truncatula GN=MTR_2g083860 PE=4 SV=1	0	106.021	65	17	87	11	218	24.1	6.09	286.94	17	Not Found	High	High	High	High	High	High	High	Not Found	Not Found	High	High	High	High	Not Found	High	High	High	High	High	High	High	High	High	1	0		0
High	Master Protein	A0A072U790	Feronia receptor-like kinase OS=Medicago truncatula GN=MTR_7g015390 PE=4 SV=1	0	50.291	15	12	25	11	889	101.3	6.7	84.91	12	Not Found	Not Found	Not Found	High	High	High	High	Not Found	Not Found	Not Found	High	High	High	High	Not Found	Not Found	Not Found	Not Found	High	High	High	Not Found	High	Not Found	1	0		0
High	Master Protein	G8A036	Translocation protein TolB OS=Medicago truncatula GN=MTR_1g032010 PE=4 SV=1	0	68.492	23	11	25	11	650	72.6	5.87	101.17	11	Not Found	Not Found	High	High	Not Found	Not Found	Not Found	High	Not Found	Not Found	High	High	Not Found	High	High	High	Not Found	Not Found	High	High	High	High	Not Found	High	1	0		0
High	Master Protein	A0A072VB39	NAD(P)H-quinone oxidoreductase subunit M OS=Medicago truncatula GN=MTR_3g088645 PE=4 SV=1	0	96.991	50	11	138	11	214	24.6	5.68	501.09	11	Not Found	High	High	High	High	High	High	High	Not Found	High	High	High	High	High	High	High	High	High	High	High	High	High	High	High	1	0		0		Deamidated [Q60]
High	Master Protein	A0A072TZH9	40S ribosomal protein S23-1 OS=Medicago truncatula GN=MTR_7g061155 PE=4 SV=1	0	73.797	33	11	92	11	255	27.8	8.53	367.27	11	Not Found	High	High	High	High	High	High	High	High	Not Found	High	High	High	High	High	High	Not Found	High	High	High	High	High	High	High	1	0		0		Carboxymethyl [K192]
High	Master Protein	G7K3F3	Peroxisomal small heat shock protein OS=Medicago truncatula GN=MTR_5g091960 PE=3 SV=1	0	115.371	56	11	45	11	259	29.1	7.46	220.86	11	High	Not Found	Not Found	High	High	High	High	High	High	Not Found	High	High	Not Found	High	High	High	High	Not Found	High	Not Found	Not Found	High	High	High	1	0		0		Deamidated [Q118]
High	Master Protein	G7IL50	Methionine S-methyltransferase OS=Medicago truncatula GN=MTR_2g005110 PE=3 SV=1	0	69.811	11	11	28	11	1092	121	5.8	87.81	11	Not Found	Not Found	High	High	Not Found	Not Found	High	High	Not Found	Not Found	High	High	Not Found	High	High	High	Not Found	Not Found	High	High	High	High	High	High	1	0		0		Deamidated [Q960]
High	Master Protein	G7J9B8	Glutamine synthetase OS=Medicago truncatula GN=MTR_3g065250 PE=3 SV=1	0	118.743	40	14	52	11	356	39.1	5.59	219.43	14	Not Found	High	Not Found	High	High	High	High	High	Not Found	High	Not Found	High	High	High	High	High	Not Found	High	Not Found	High	High	High	High	High	1	0		0
High	Master Protein	Q93YX8	Phosphoinositide phospholipase C OS=Medicago truncatula GN=PLC1 PE=4 SV=1	0	277.074	48	33	264	11	593	67.4	6.37	1076.75	33	Not Found	High	High	High	High	High	High	High	Not Found	High	High	High	High	High	High	High	Not Found	High	High	High	High	High	High	High	1	0		0
High	Master Protein	G7J970	NAD(P)-binding rossmann-fold protein OS=Medicago truncatula GN=MTR_3g105660 PE=2 SV=1	0	86.39	37	11	45	11	286	30.5	9.35	199.62	11	High	High	High	Not Found	High	High	High	High	High	High	High	High	High	High	High	Not Found	High	High	High	Not Found	High	High	High	High	1	0		0
High	Master Protein	A0A072UIU2	Heat shock cognate 70 kDa-like protein OS=Medicago truncatula GN=MTR_6g033820 PE=3 SV=1	0	40.309	17	11	24	11	679	75.4	6.2	65.89	11	Not Found	High	High	High	High	Not Found	High	High	Not Found	High	High	High	High	Not Found	Not Found	High	Not Found	Not Found	High	High	High	High	Not Found	High	1	0		0
High	Master Protein	G7JT17	Phospholipid-transporting ATPase OS=Medicago truncatula GN=MTR_4g112430 PE=3 SV=1	0	79.172	13	12	26	11	1209	137	6.46	105.53	12	Not Found	Not Found	High	High	Not Found	Not Found	High	High	Not Found	Not Found	High	High	Not Found	Not Found	High	High	Not Found	Not Found	High	High	Not Found	Not Found	Not Found	Not Found	1	0		0
High	Master Protein	A0A072TWI9	Glycyl-tRNA synthetase alpha chain/beta chain OS=Medicago truncatula GN=MTR_8g006955 PE=3 SV=1	0	35.636	11	11	15	11	1079	121.1	5.6	42.92	11	Not Found	Medium	Not Found	High	Not Found	High	High	High	Not Found	Not Found	Not Found	High	Not Found	High	Not Found	Not Found	Not Found	Medium	High	High	High	High	Not Found	Not Found	1	0		0		Deamidated [Q423]
High	Master Protein	A0A072UE02	Acylamino-acid-releasing enzyme-like protein, putative OS=Medicago truncatula GN=MTR_5g042400 PE=4 SV=1	0	75.247	20	11	28	11	769	83.9	5.92	136.17	11	Not Found	High	High	High	High	High	High	High	Not Found	Not Found	High	High	High	Not Found	Not Found	High	Not Found	High	Not Found	High	High	High	Not Found	High	1	0		0
High	Master Protein	A0A072VJM3	Thioredoxin reductase OS=Medicago truncatula GN=MTR_1g053160 PE=3 SV=1	0	84.722	27	11	22	11	514	56.2	7.25	99.43	11	High	High	High	High	High	Not Found	Not Found	High	Not Found	High	Not Found	Not Found	High	Not Found	Not Found	High	High	High	Not Found	High	High	High	Not Found	Not Found	1	0		0
High	Master Protein	G7IQY3	Receptor-like kinase OS=Medicago truncatula GN=MTR_2g075140 PE=4 SV=2	0	76.107	27	14	40	11	626	68.3	7.97	137.11	14	Not Found	Not Found	High	High	High	High	High	High	Not Found	High	Not Found	Not Found	High	High	High	Not Found	Not Found	Not Found	Not Found	Not Found	High	High	High	High	1	0		0
High	Master Protein	G7LF48	Disease resistance protein (TIR-NBS-LRR class) OS=Medicago truncatula GN=MTR_8g012200 PE=4 SV=1	0	84.11	17	13	29	11	1091	122.3	7.09	120.89	13	Not Found	Not Found	High	Not Found	High	High	High	High	Not Found	Not Found	Not Found	Not Found	High	High	High	High	Not Found	Not Found	Not Found	Not Found	High	High	High	Not Found	1	0		0
High	Master Protein	A0A072TMJ9	Non-specific phospholipase C4 OS=Medicago truncatula GN=MTR_8g010590 PE=4 SV=1	0	101.69	32	12	44	11	523	59	5.72	191.93	12	Not Found	Not Found	Not Found	Not Found	High	High	High	High	Not Found	Not Found	Not Found	Not Found	High	High	High	High	Not Found	Not Found	Not Found	Not Found	High	High	High	High	1	0		0
High	Master Protein	G7IEX3	Vacuolar-sorting receptor-like protein OS=Medicago truncatula GN=MTR_1g106940 PE=4 SV=2	0	83.326	24	12	39	11	632	69.5	5.55	159.38	12	Not Found	High	High	Not Found	Not Found	High	High	High	Not Found	High	Medium	Not Found	Not Found	High	High	High	Not Found	High	Not Found	High	Not Found	High	High	High	1	0		0
High	Master Protein	G7LIN4	Importin beta-3, putative OS=Medicago truncatula GN=MTR_8g085950 PE=4 SV=1	0	61.421	11	13	30	11	1117	123.1	4.83	104.72	13	Medium	High	Not Found	High	High	High	High	High	High	High	High	Not Found	Not Found	High	High	Not Found	Not Found	Not Found	High	High	High	High	High	High	1	0		0
High	Master Protein	A0A072VT43	Translation elongation factor EF-2 subunit OS=Medicago truncatula GN=MTR_1g048000 PE=4 SV=1	0	330.897	46	39	166	11	843	94.1	6.2	673.47	39	High	High	High	High	High	High	High	Not Found	Medium	Not Found	Not Found	High	High	High	Not Found	Not Found	High	Not Found	Not Found	High	High	Not Found	Not Found	Not Found	1	0		0		Deamidated [R93; Q832]; Carboxymethyl [K830]
High	Master Protein	G7ZVI4	Photosystem II oxygen-evolving enhancer protein OS=Medicago truncatula GN=MTR_8g078870 PE=4 SV=1	0	415.22	70	26	476	11	329	35	6.62	2483.68	26	High	High	High	High	High	High	High	High	High	High	High	High	High	High	High	High	High	High	High	High	High	High	High	High	1	4	Phospho [T104; S217; S222; S224]	0		Deamidated [Q94; Q109; Q155; R162; Q213; R260; Q303]; Phospho [T104; S217; S222; S224]; Carboxymethyl [K131; K158]
High	Master Protein	A0A072UAP6	M48 family peptidase OS=Medicago truncatula GN=MTR_6g463380 PE=4 SV=1	0	88.678	24	11	30	11	534	59.4	9.6	126.74	11	High	High	High	High	Not Found	High	High	High	Not Found	High	High	High	Not Found	Not Found	High	High	Not Found	High	High	High	High	High	High	High	1	0		0
High	Master Protein	A0A072UP92	Cadmium/zinc-transporting ATPase, putative OS=Medicago truncatula GN=MTR_4g094985 PE=3 SV=1	0	71.833	20	11	42	11	818	88.6	8.16	168.47	11	Not Found	Not Found	High	High	High	High	High	High	Not Found	Not Found	High	High	High	High	High	High	Not Found	Not Found	Not Found	High	High	High	High	High	1	0		0
High	Master Protein	G7K2N4	Lectin receptor kinase OS=Medicago truncatula GN=MTR_5g025020 PE=4 SV=2	0	97.503	20	12	71	11	698	77.7	6.65	228.29	12	Not Found	High	High	High	High	High	High	High	Not Found	Not Found	High	High	High	High	High	High	Not Found	Not Found	High	High	High	High	High	High	1	0		0
High	Master Protein	G7K9A7	Cytochrome P450 family 97 protein OS=Medicago truncatula GN=MTR_5g009110 PE=3 SV=1	0	63.876	21	11	32	11	574	64.4	6.81	128.36	11	Not Found	Not Found	Not Found	High	High	High	High	High	Not Found	Not Found	Not Found	High	Not Found	High	High	Not Found	Not Found	Not Found	High	High	High	High	High	High	1	0		0
High	Master Protein	A0A072TMW6	GPI transamidase component Gpi16 subunit-like protein OS=Medicago truncatula GN=MTR_8g013045 PE=4 SV=1	0	64.056	22	11	27	11	661	74.4	7.23	106.04	11	Not Found	High	High	Not Found	High	High	High	High	Not Found	High	High	High	Not Found	High	High	High	Not Found	High	High	High	High	High	High	High	1	0		0
High	Master Protein	G7K3Y7	Carotenoid cleavage dioxygenase 4a-6 OS=Medicago truncatula GN=MTR_5g025270 PE=4 SV=2	0	93.088	26	11	27	11	581	63.9	7.14	133.78	11	Not Found	High	High	High	High	Not Found	Not Found	High	Not Found	Not Found	High	High	Not Found	High	High	High	Not Found	High	Not Found	High	High	High	High	High	1	0		0
High	Master Protein	A0A072VLV1	Plant/MNJ8-150 protein OS=Medicago truncatula GN=MTR_1g079763 PE=4 SV=1	0	103.667	30	11	105	11	311	33.4	8.75	491.87	11	Not Found	High	High	High	High	High	High	High	Not Found	High	High	High	High	High	High	High	High	High	Not Found	High	High	High	High	High	1	0		0
High	Master Protein	B7FJV5	Transmembrane protein, putative OS=Medicago truncatula GN=MTR_6g029250 PE=2 SV=1	0	69.205	43	11	41	11	228	26	4.88	153.79	11	Not Found	High	High	High	High	High	High	High	Not Found	Not Found	High	High	High	Not Found	Not Found	Not Found	Not Found	Not Found	High	High	High	Not Found	High	High	1	0		0
High	Master Protein	G7JVE7	NADPH--cytochrome P450 reductase OS=Medicago truncatula GN=MTR_4g128020 PE=3 SV=1	0	114.165	24	15	65	11	701	77.9	5.41	256.45	15	High	High	High	High	High	High	High	High	Not Found	High	High	High	Not Found	High	High	High	Not Found	Not Found	High	High	High	High	High	High	1	0		0		Deamidated [Q287]
High	Master Protein	G7L7L3	Subtilisin-like serine protease OS=Medicago truncatula GN=MTR_8g021130 PE=4 SV=1	0	82.816	20	11	26	11	785	83.8	6.83	124.86	11	Not Found	Not Found	Not Found	High	High	High	High	High	Not Found	Not Found	Not Found	High	High	High	Not Found	High	Not Found	Not Found	Not Found	High	High	High	Not Found	High	1	0		0
High	Master Protein	G7KVH9	Transducin/WD40 repeat protein OS=Medicago truncatula GN=MTR_7g111080 PE=4 SV=2	0	113.606	15	11	26	11	1329	143.2	7.06	145.35	11	Not Found	Not Found	High	High	High	High	High	High	Not Found	Not Found	High	High	High	High	High	High	Not Found	Not Found	High	High	High	Not Found	High	High	1	0		0
High	Master Protein	A0A072UIK1	DnaJ heat shock amino-terminal domain protein OS=Medicago truncatula GN=MTR_4g032805 PE=4 SV=1	0	91.641	35	11	54	11	269	30.7	7.52	221.87	11	Not Found	High	High	High	High	High	High	High	Not Found	Not Found	High	High	High	High	High	High	Not Found	Not Found	High	High	High	High	High	High	1	0		0
High	Master Protein	A0A072UQP0	Cytochrome P450 family protein OS=Medicago truncatula GN=MTR_4g102280 PE=3 SV=1	0	60.666	22	11	38	11	516	58.1	6.43	151.03	11	Not Found	High	High	High	High	Not Found	Not Found	High	Not Found	Not Found	High	High	High	High	High	High	Not Found	Not Found	High	High	High	High	High	High	1	0		0
High	Master Protein	S4T0Y5	Photosystem II D2 protein OS=Medicago truncatula GN=psbD PE=3 SV=1	0	191.687	27	11	254	11	353	39.5	5.55	1035.47	11	High	High	High	High	High	High	High	High	High	High	High	High	High	High	High	High	High	High	High	High	High	High	High	High	1	0		0		Deamidated [R327; Q335; R349]
High	Master Protein	A0A072VM16	Prohibitin complex protein OS=Medicago truncatula GN=MTR_2g090760 PE=4 SV=1	0	242.311	71	22	243	11	287	31.4	9.64	983.13	22	Not Found	High	High	High	High	High	High	High	Not Found	Not Found	High	High	High	High	High	High	Not Found	High	High	High	High	High	High	High	1	0		0		Deamidated [Q235]
High	Master Protein	A0A072VNH5	Coatomer subunit alpha OS=Medicago truncatula GN=MTR_1g090827 PE=4 SV=1	0	165.185	21	24	64	11	1216	136.2	6.92	267.23	24	Not Found	High	High	Not Found	Not Found	Not Found	Not Found	High	Not Found	High	High	High	Not Found	High	High	High	Not Found	High	High	High	Not Found	Not Found	High	High	1	0		0
High	Master Protein	G7J5F4	Pantothenate kinase OS=Medicago truncatula GN=MTR_3g077740 PE=4 SV=1	0	50.941	12	11	26	11	893	98.9	5.82	85.19	11	Not Found	High	High	High	Not Found	High	High	High	Not Found	High	Not Found	Not Found	Not Found	Not Found	High	High	Not Found	Not Found	High	High	High	Not Found	High	High	1	0		0
High	Master Protein	G7J2L0	60 kDa inner membrane protein OS=Medicago truncatula GN=MTR_3g086250 PE=3 SV=1	0	97.911	25	11	66	11	532	58.5	8.27	257.03	11	Not Found	High	High	Not Found	High	High	High	High	High	High	High	High	High	High	High	High	High	High	High	High	High	High	High	High	1	0		0		Deamidated [Q436; Q443]
High	Master Protein	G7K804	Patatin OS=Medicago truncatula GN=MTR_5g017670 PE=3 SV=1	0	72.494	24	11	46	11	399	43.9	6.42	185.68	11	Not Found	High	High	High	High	High	High	Not Found	Not Found	Not Found	High	High	High	Medium	High	High	Not Found	Not Found	High	High	High	Not Found	High	High	1	0		0
High	Master Protein	G7IA05	Armadillo/beta-catenin-like repeat protein, putative OS=Medicago truncatula GN=MTR_1g031750 PE=4 SV=1	0	77.721	20	11	27	11	826	90.2	5.31	107.12	11	Not Found	Not Found	Not Found	High	High	High	High	High	Not Found	Not Found	Not Found	High	High	Not Found	High	High	Not Found	Not Found	High	Not Found	High	Not Found	High	High	1	0		0
High	Master Protein	G7J9A2	NAD-dependent epimerase/dehydratase family protein OS=Medicago truncatula GN=MTR_3g118430 PE=4 SV=2	0	66.236	28	11	73	11	393	43.8	8.85	277.56	11	High	High	High	High	High	High	High	High	Not Found	High	High	High	High	High	High	High	High	High	High	High	High	High	High	High	1	0		0
High	Master Protein	A0A072UDH6	ATP-dependent zinc metalloprotease FTSH protein OS=Medicago truncatula GN=MTR_7g096060 PE=3 SV=1	0	101.032	24	15	45	11	701	78	7.05	182.04	15	Not Found	Not Found	High	High	High	High	Not Found	Not Found	Not Found	Not Found	High	High	Not Found	High	Not Found	High	Not Found	Not Found	High	High	Not Found	High	Not Found	High	1	0		0		Deamidated [Q269]
High	Master Protein	Q1SMZ8	Peptidylprolyl isomerase OS=Medicago truncatula GN=MTR_8g107010 PE=4 SV=1	0	98.063	45	11	47	11	256	27.5	6.6	196.37	11	Not Found	High	High	High	High	High	High	High	Not Found	High	High	High	High	High	High	High	Not Found	High	High	High	Not Found	High	High	High	1	0		0		Deamidated [R139]
High	Master Protein	G7IA37	Pyrophosphate--fructose 6-phosphate 1-phosphotransferase subunit alpha OS=Medicago truncatula GN=PFP-ALPHA PE=3 SV=2	0	46.528	19	11	22	11	597	65.3	6.67	59.93	11	Not Found	Not Found	Not Found	High	High	Not Found	High	High	Not Found	Not Found	Not Found	High	Not Found	High	High	Not Found	Not Found	Not Found	Not Found	High	High	High	High	High	1	0		0
High	Master Protein	A0A072TYM9	Eukaryotic translation initiation factor 3 subunit OS=Medicago truncatula GN=MTR_8g027685 PE=4 SV=1	0	80.807	10	12	27	11	1827	200.9	6.42	126.75	12	Not Found	High	High	High	Not Found	Not Found	High	High	Not Found	High	High	Not Found	High	High	High	High	Not Found	High	High	High	Not Found	High	High	High	1	0		0
High	Master Protein	G7K9A4	Mg-protoporphyrin IX chelatase OS=Medicago truncatula GN=MTR_5g009070 PE=3 SV=1	0	49.255	18	11	17	11	754	82.9	5.71	55.93	11	Not Found	High	Not Found	Not Found	Not Found	High	High	Not Found	Not Found	Not Found	High	Not Found	Not Found	Not Found	High	Not Found	Not Found	High	Not Found	High	High	High	High	High	1	0		0
High	Master Protein	A0A072UJE5	S-acyltransferase OS=Medicago truncatula GN=MTR_6g038020 PE=3 SV=1	0	73.802	25	12	32	11	419	47.9	8.18	110.1	12	Medium	High	High	High	Not Found	High	Not Found	High	Not Found	High	High	High	Not Found	High	Not Found	Not Found	High	High	High	High	Not Found	Not Found	Not Found	Not Found	1	0		0
High	Master Protein	A0A072VYY2	Receptor-like kinase in in flowers protein OS=Medicago truncatula GN=MTR_1g089600 PE=4 SV=1	0	76.464	20	14	56	11	651	70.9	6.71	162.47	14	Not Found	High	Not Found	High	High	High	High	High	Not Found	Not Found	High	High	High	Not Found	High	High	Not Found	Not Found	Not Found	High	High	High	High	High	1	0		0
High	Master Protein	A0A072U1Y7	Acyl-CoA dehydrogenase OS=Medicago truncatula GN=MTR_7g068850 PE=3 SV=1	0	54.2	33	11	37	11	433	47.6	8.32	112.84	11	Not Found	Not Found	High	High	High	High	High	High	Not Found	Not Found	High	High	High	High	High	High	Not Found	Not Found	High	Not Found	Not Found	High	High	High	1	0		0		Deamidated [Q429]
High	Master Protein	Q1SL05	RAB GTPase-like protein A1D OS=Medicago truncatula GN=MTR_2g005510 PE=4 SV=1	0	134.708	65	16	92	11	220	24.3	7.84	364.68	16	Not Found	Not Found	High	High	High	High	High	High	High	High	High	High	High	High	Not Found	High	High	High	High	High	High	High	High	Not Found	1	0		0
High	Master Protein	G7JGW1	Eukaryotic translation initiation factor 3 subunit OS=Medicago truncatula GN=MTR_4g009960 PE=4 SV=2	0	82.17	11	12	19	11	1638	179.7	6.87	79.34	12	High	High	High	Not Found	High	High	Not Found	Not Found	High	High	Not Found	Not Found	High	Not Found	Not Found	High	High	Not Found	Not Found	Not Found	Not Found	Not Found	Not Found	High	1	0		0
High	Master Protein	G7KIR1	Carbonic anhydrase OS=Medicago truncatula GN=MTR_6g006990 PE=3 SV=1	0	127.898	54	12	186	11	260	28.2	6.54	771.86	12	High	High	High	High	High	High	High	High	High	High	High	High	High	High	High	High	High	High	High	High	High	High	High	High	1	2	Phospho [T34; T39]	0		Deamidated [Q13; Q36]; Phospho [T34; T39]
High	Master Protein	A0A072TVM3	TCP-1/cpn60 chaperonin family protein OS=Medicago truncatula GN=MTR_7g406870 PE=3 SV=1	0	65.867	23	11	38	11	535	59.3	6.49	142.92	11	Not Found	Not Found	High	High	High	High	High	High	Not Found	Not Found	Not Found	High	High	High	High	High	High	High	High	High	High	Not Found	High	High	1	0		0
High	Master Protein	G7LGP4	Phosphotransferase OS=Medicago truncatula GN=MTR_8g014530 PE=3 SV=1	0	110.504	34	13	56	11	494	53.5	5.99	273.27	13	Not Found	High	High	High	High	High	High	High	Not Found	High	High	High	High	Not Found	Not Found	High	Not Found	High	High	High	High	High	High	High	1	0		0
High	Master Protein	A0A072V1D5	Patellin-3 protein OS=Medicago truncatula GN=MTR_3g097350 PE=4 SV=1	0	129.657	34	14	68	11	573	64	4.83	287.27	14	High	High	High	High	High	High	High	Not Found	Not Found	Not Found	High	High	Not Found	High	High	High	High	Not Found	High	High	High	High	High	High	1	0		0
High	Master Protein	A0A072U1Q0	Insulin-degrading enzyme OS=Medicago truncatula GN=MTR_7g091590 PE=3 SV=1	0	37.473	11	11	28	11	964	110.8	6.24	75.35	11	High	High	High	High	High	High	High	High	Not Found	High	High	High	High	High	High	High	Not Found	Not Found	High	High	Not Found	High	High	High	1	0		0
High	Master Protein	G7JG50	Coatomer subunit gamma OS=Medicago truncatula GN=MTR_4g069920 PE=3 SV=1	0	115.975	22	16	43	11	885	98.2	5.21	177.33	16	Not Found	High	High	High	Not Found	High	High	Not Found	Not Found	Not Found	High	High	High	High	High	High	Not Found	Not Found	Not Found	High	High	High	High	High	1	0		0
High	Master Protein	G7IJW8	Plastid lipid-associated protein OS=Medicago truncatula GN=MTR_2g007300 PE=4 SV=2	0	80.742	46	12	37	11	243	27	9.19	171.85	12	Not Found	High	High	High	High	High	High	High	Not Found	High	High	High	High	High	High	High	Not Found	High	Not Found	Not Found	High	High	High	High	1	0		0
High	Master Protein	G7IFH4	Uncharacterized protein OS=Medicago truncatula GN=MTR_2g014890 PE=4 SV=1	0	59.605	22	11	17	11	614	68.6	6.07	53.23	11	Not Found	High	High	Not Found	High	Not Found	Not Found	High	Not Found	Not Found	High	Not Found	High	Not Found	Not Found	High	Not Found	Not Found	High	Not Found	High	High	Not Found	High	1	0		0
High	Master Protein	A0A072U8D8	Long chain base biosynthesis 2a-like protein OS=Medicago truncatula GN=MTR_6g033290 PE=3 SV=1	0	103.393	22	11	45	11	490	54.1	8.31	207.03	11	Not Found	Not Found	High	High	Medium	High	High	High	High	Not Found	Not Found	High	High	High	High	High	Not Found	High	High	High	High	High	High	High	1	0		0		Deamidated [R203]
High	Master Protein	Q6UY57	Lectin receptor kinase OS=Medicago truncatula GN=LecRK1;1 PE=2 SV=1	0	49.274	16	11	28	11	678	75.8	5.81	72.14	11	Not Found	High	Not Found	High	High	Not Found	High	Medium	Not Found	Not Found	Medium	High	High	High	High	High	Not Found	High	High	High	High	High	High	High	1	0		0		Deamidated [R543]
High	Master Protein	G7LAF3	Cellulose synthase-interactive protein OS=Medicago truncatula GN=MTR_8g091470 PE=4 SV=2	0	64.967	7	12	21	11	2216	237.2	5.66	70.57	12	Not Found	Not Found	Not Found	Not Found	High	Not Found	Not Found	High	Not Found	Not Found	Not Found	High	Not Found	High	High	High	Not Found	Not Found	Not Found	High	High	High	Not Found	High	1	0		0
High	Master Protein	G7LJC7	Transmembrane protein, putative OS=Medicago truncatula GN=MTR_8g069450 PE=4 SV=1	0	75.152	34	11	37	11	321	36.1	6.24	137.79	11	High	High	High	High	High	High	High	High	High	Not Found	Not Found	High	High	High	High	High	Not Found	Not Found	High	High	High	High	High	High	1	0		0
High	Master Protein	G7JB75	Chlorophyll a-b binding protein, chloroplastic OS=Medicago truncatula GN=MTR_3g070340 PE=3 SV=1	0	192.686	39	12	264	11	278	30.7	6.01	1180.54	12	High	High	High	High	High	High	High	High	High	High	High	High	High	High	High	High	High	High	High	High	High	High	High	High	1	0		0		Deamidated [Q127; Q136; R137]
High	Master Protein	G7JDZ5	Urease accessory protein UreG OS=Medicago truncatula GN=MTR_4g096770 PE=3 SV=1	0	61.074	37	11	23	11	274	29.9	6.44	91.32	11	Not Found	High	Not Found	Not Found	High	High	High	High	Not Found	Not Found	Not Found	High	Not Found	High	High	High	Not Found	High	Not Found	Not Found	High	High	High	Not Found	1	0		0
High	Master Protein	A0A072VPV8	Cytochrome P450 family 87 protein OS=Medicago truncatula GN=MTR_1g492820 PE=3 SV=1	0	51.864	18	11	44	11	520	58.7	9.13	141.6	11	Not Found	Not Found	Not Found	High	High	High	High	High	Not Found	Not Found	Not Found	Not Found	High	High	High	High	Not Found	Not Found	Not Found	Not Found	High	High	High	High	1	0		0
High	Master Protein	A0A072V8L1	Citrate synthase OS=Medicago truncatula GN=MTR_2g061630 PE=3 SV=1	0	43.862	23	11	29	11	472	52.5	7.42	87.12	11	Not Found	High	Not Found	High	High	High	High	Not Found	Not Found	High	Not Found	High	Not Found	High	High	High	Not Found	High	Not Found	Not Found	Not Found	High	High	High	1	0		0
High	Master Protein	G7JHJ7	Transcription factor Pur-alpha-like protein OS=Medicago truncatula GN=MTR_4g083230 PE=4 SV=1	0	56.912	47	11	34	11	293	32.1	5.94	124.42	11	High	Not Found	High	High	Not Found	High	High	High	Not Found	Not Found	High	High	High	High	High	High	Not Found	High	High	High	High	High	High	High	1	0		0
High	Master Protein	A0A072USV7	CAAX amino terminal protease family protein OS=Medicago truncatula GN=MTR_4g124670 PE=4 SV=1	0	57.348	8	11	20	11	1729	189.5	5.03	66.85	11	Not Found	High	High	High	High	Not Found	High	Not Found	Not Found	High	High	Not Found	High	High	High	High	Not Found	Not Found	Not Found	High	High	Not Found	High	High	1	0		0
High	Master Protein	G7JLJ7	Glyoxysomal fatty acid beta-oxidation MFP-A protein OS=Medicago truncatula GN=MTR_4g120130 PE=4 SV=2	0	74.126	20	14	32	11	723	78.8	9.1	116.46	14	Not Found	High	High	Not Found	Not Found	High	High	High	Not Found	High	High	High	Not Found	High	High	High	Not Found	High	High	High	Not Found	High	High	High	1	0		0
High	Master Protein	A0A072U721	Pathogen-inducible alpha-dioxygenase OS=Medicago truncatula GN=MTR_6g007767 PE=4 SV=1	0	61.145	24	11	13	11	569	64.8	6.9	46.37	11	Not Found	High	High	High	Not Found	Not Found	Not Found	High	Not Found	Not Found	Not Found	High	High	Not Found	Not Found	Not Found	Not Found	Not Found	Not Found	High	High	Not Found	Not Found	Not Found	1	0		0
High	Master Protein	A0A072TIU5	DUF3411 domain protein OS=Medicago truncatula GN=MTR_0013s0150 PE=4 SV=1	0	76.61	26	12	65	11	381	40.9	7.85	232.6	12	Not Found	High	High	High	High	High	High	High	High	Not Found	High	High	High	High	High	High	Not Found	Not Found	High	High	High	High	High	High	1	0		0
High	Master Protein	Q1RU99	Albumin-2 protein OS=Medicago truncatula GN=MTR_8g038100 PE=4 SV=1	0	40.677	21	11	30	11	528	59.8	6.25	85.79	11	Not Found	High	Not Found	High	High	Not Found	Not Found	Not Found	Not Found	High	High	High	High	High	High	Not Found	Not Found	Not Found	High	High	High	Not Found	Not Found	High	1	0		0
High	Master Protein	G7LIM1	Calcium ion-binding protein OS=Medicago truncatula GN=MTR_8g085780 PE=4 SV=1	0	68.806	21	11	32	11	573	66	8.4	103.49	11	Not Found	Not Found	Not Found	High	High	High	High	High	Not Found	Not Found	Not Found	High	High	Medium	High	High	Not Found	Not Found	Not Found	Not Found	High	Not Found	High	High	1	0		0		Carboxymethyl [K411]
High	Master Protein	G7KPX0	Receptor-like kinase OS=Medicago truncatula GN=MTR_6g088610 PE=4 SV=1	0	111.029	23	12	74	11	674	71.6	7.97	290	12	Not Found	High	High	High	High	High	High	High	Not Found	High	High	High	High	High	High	High	Not Found	Not Found	High	High	High	High	High	High	1	0		0		Deamidated [Q337; R454]
High	Master Protein	Q5D875	Calcium-dependent kinase OS=Medicago truncatula GN=CDPK1 PE=2 SV=1	0	84.561	29	11	35	11	560	63.5	9.03	166	11	Not Found	High	High	High	High	High	High	High	Not Found	High	High	High	Not Found	High	High	High	Not Found	High	Not Found	High	High	High	High	High	1	1	Phospho [S552]	0		Phospho [S552]
High	Master Protein	A0A072V5M4	Integrin-linked kinase family protein OS=Medicago truncatula GN=MTR_2g017825 PE=4 SV=1	0	67.311	36	11	40	11	357	39.9	6.25	129.77	11	High	High	High	High	High	High	High	Not Found	Not Found	Not Found	High	High	High	High	High	Not Found	High	High	High	High	High	High	High	Not Found	1	0		0
High	Master Protein	A0A072UDD3	Serine/Threonine kinase family protein OS=Medicago truncatula GN=MTR_6g086565 PE=4 SV=1	0	65.32	23	11	17	11	633	69.3	7.88	62.87	11	Not Found	Not Found	High	High	High	High	High	High	Not Found	High	High	High	High	Not Found	Not Found	Not Found	Not Found	High	Not Found	Not Found	High	Not Found	Not Found	Not Found	1	0		0
High	Master Protein	G7JTY4	LL-diaminopimelate aminotransferase OS=Medicago truncatula GN=MTR_4g092620 PE=3 SV=1	0	73.878	32	11	23	11	459	49.9	7.28	92.37	11	Not Found	Not Found	High	High	High	Not Found	High	High	Not Found	Not Found	Not Found	Not Found	High	High	High	Not Found	Not Found	Not Found	High	Not Found	High	High	High	High	1	0		0
High	Master Protein	A0A072U5L4	Sucrose synthase OS=Medicago truncatula GN=MTR_7g108930 PE=3 SV=1	0	58.725	18	12	31	11	809	92.2	6.1	114.61	12	Not Found	Not Found	High	High	High	High	High	High	Not Found	Not Found	Not Found	High	Not Found	High	High	Not Found	High	Not Found	Not Found	High	High	Not Found	High	High	1	0		0
High	Master Protein	A0A072U605	Kinesin light chain OS=Medicago truncatula GN=MTR_8g099745 PE=4 SV=1	0	55.207	22	12	29	11	588	64.5	5.47	116.51	12	Not Found	High	High	High	High	High	Not Found	Not Found	Not Found	Not Found	High	High	Not Found	High	Not Found	Not Found	Not Found	High	High	High	High	High	Not Found	Not Found	1	0		0
High	Master Protein	A0A072VA70	Caffeic acid O-methyltransferase OS=Medicago truncatula GN=MTR_2g072790 PE=3 SV=1	0	88.963	45	11	55	11	354	39.3	6.4	217.91	11	Not Found	High	High	Not Found	High	High	High	High	Not Found	Not Found	High	High	High	High	High	High	Not Found	High	High	High	High	High	High	High	1	0		0
High	Master Protein	Q5QQ33	ADP-ribosylation factor 1 OS=Medicago truncatula GN=arf1 PE=2 SV=1	0	80.837	53	11	70	10	181	20.7	6.95	259.41	11	High	High	High	Not Found	High	High	High	High	Not Found	High	High	High	Not Found	High	High	High	High	High	High	High	High	High	High	High	1	0		0
High	Master Protein	A0A072U637	Serine/Threonine kinase family protein OS=Medicago truncatula GN=MTR_8g100085 PE=4 SV=1	0	61.055	30	11	43	10	414	46.3	7.49	134.45	11	Not Found	High	High	High	High	Not Found	High	High	Not Found	High	High	High	High	High	Medium	Not Found	Not Found	High	High	High	Not Found	Not Found	High	High	1	0		0		Deamidated [R164]
High	Master Protein	G7ISW5	Outer arm dynein light chain 1 OS=Medicago truncatula GN=MTR_2g048210 PE=4 SV=2	0	41.203	7	10	18	10	1660	181.5	6.57	55.9	10	Not Found	Not Found	High	High	Not Found	Not Found	Not Found	Not Found	Not Found	Not Found	High	High	Not Found	Not Found	High	High	Not Found	Not Found	High	High	Not Found	High	High	High	1	0		0
High	Master Protein	G7IWN4	Cellulose synthase OS=Medicago truncatula GN=MTR_3g030040 PE=3 SV=1	0	56.775	14	13	19	10	1078	120.8	7.52	62.01	13	Not Found	High	High	High	High	Not Found	High	High	Not Found	High	High	Not Found	Not Found	High	Not Found	Not Found	Not Found	High	High	Not Found	High	High	Not Found	Not Found	1	0		0
High	Master Protein	G7JZK0	Asparagine synthetase [glutamine-hydrolyzing] protein OS=Medicago truncatula GN=MTR_5g071360 PE=4 SV=1	0	123.891	35	19	87	10	584	65.8	6.39	286.94	19	Not Found	Not Found	High	High	High	High	High	Not Found	Not Found	Not Found	High	High	High	High	High	Not Found	Not Found	Not Found	High	High	High	High	High	High	1	0		0		Deamidated [R85]
High	Master Protein	G7I2N9	Carboxy-terminal processing peptidase-like protein OS=Medicago truncatula GN=MTR_1g073130 PE=4 SV=2	0	57.442	27	10	21	10	504	55.2	9.09	69.4	10	Not Found	Not Found	Not Found	Not Found	High	High	High	High	Not Found	High	Not Found	High	High	High	Not Found	Not Found	Not Found	Not Found	Not Found	Not Found	High	High	Not Found	Not Found	1	0		0		Deamidated [Q260]
High	Master Protein	G7J4K7	TPR domain protein OS=Medicago truncatula GN=MTR_3g100100 PE=4 SV=1	0	162.07	51	10	111	10	223	24.5	8.85	564.21	10	High	High	High	High	High	High	High	High	High	Not Found	High	High	High	High	High	High	High	Not Found	High	High	High	High	High	High	1	1	Phospho [S172]	0		Phospho [S172]
High	Master Protein	G7IED1	Stem-loop-binding protein of 41 kDa protein A OS=Medicago truncatula GN=MTR_1g072260 PE=4 SV=1	0	77.736	29	10	54	10	401	43.4	7.33	214.27	10	High	High	High	High	High	High	High	High	High	High	Not Found	High	High	High	High	High	High	High	Not Found	High	High	High	High	High	1	0		0		Deamidated [Q264]
High	Master Protein	G7ICQ0	2-methyl-6-phytylbenzoquinone methyltransferase OS=Medicago truncatula GN=MTR_1g071110 PE=3 SV=1	0	109.723	37	15	135	10	347	39.1	9.06	511.06	15	High	High	High	High	High	High	High	High	Not Found	High	High	High	High	High	High	High	High	High	High	High	High	High	High	High	1	1	Phospho [T148]	0		Deamidated [Q152]; Phospho [T148]
High	Master Protein	G7J3I9	Transmembrane protein, putative OS=Medicago truncatula GN=MTR_3g110460 PE=4 SV=2	0	73.845	9	10	30	10	1447	155.4	6.14	107.91	10	Not Found	High	High	High	High	High	Not Found	High	Not Found	High	High	High	High	High	High	High	Not Found	High	High	High	High	High	High	High	1	0		0
High	Master Protein	A0A072U5I5	Eukaryotic aspartyl protease family protein OS=Medicago truncatula GN=MTR_7g117430 PE=3 SV=1	0	81.443	22	10	53	10	485	52.4	8.54	223	10	Not Found	Not Found	High	High	High	High	High	High	Not Found	Not Found	High	High	High	High	High	High	Not Found	Not Found	High	High	High	High	High	High	1	0		0		Deamidated [R372]
High	Master Protein	G7II48	Heat shock 70 kDa protein OS=Medicago truncatula GN=MTR_2g102180 PE=3 SV=1	0	74.217	21	15	28	10	858	95.2	5.24	102.58	15	Not Found	High	High	High	High	High	High	High	Not Found	Not Found	High	High	High	Not Found	High	High	Not Found	Not Found	High	Not Found	Not Found	High	High	High	1	0		0
High	Master Protein	G7IL85	Actin-related protein 4A OS=Medicago truncatula GN=MTR_2g008050 PE=3 SV=1	0	240.635	65	25	201	10	377	41.6	5.49	854.68	25	Not Found	High	High	High	High	High	High	High	Not Found	Not Found	High	High	High	High	High	High	Not Found	High	High	High	High	High	High	High	1	0		0		Deamidated [R97]
High	Master Protein	G7L350	Saccharopine dehydrogenase-like protein OS=Medicago truncatula GN=MTR_7g011890 PE=4 SV=1	0	102.578	44	11	41	10	450	48.9	8.63	207.81	11	Not Found	High	High	High	High	Not Found	High	High	Not Found	High	Not Found	High	Not Found	Not Found	High	High	Not Found	High	Not Found	High	High	High	High	High	1	0		0
High	Master Protein	G7IAA1	PfkB family carbohydrate kinase OS=Medicago truncatula GN=MTR_1g064060 PE=4 SV=1	0	82.843	34	10	49	10	341	37.6	5.19	213.51	10	Not Found	High	High	High	High	High	High	High	Not Found	Not Found	Not Found	Not Found	High	High	Not Found	High	Not Found	Medium	High	High	High	High	High	High	1	0		0		Carboxymethyl [K274]
High	Master Protein	A0A072V9J5	Embryo defective 2737 protein OS=Medicago truncatula GN=MTR_2g079060 PE=4 SV=1	0	58.641	29	10	25	10	421	48.3	6.29	91.98	10	Not Found	Not Found	Not Found	High	High	High	High	High	Not Found	Not Found	Not Found	Not Found	High	High	High	Not Found	Not Found	High	Not Found	High	High	Not Found	High	Not Found	1	0		0
High	Master Protein	A0A072TVW4	SH3 domain protein OS=Medicago truncatula GN=MTR_8g100105 PE=4 SV=1	0	47.219	10	11	22	10	1182	127.7	5.44	74.73	11	Not Found	High	Not Found	High	Not Found	High	High	High	Not Found	High	Not Found	High	Not Found	High	High	Not Found	Not Found	High	Not Found	High	High	Not Found	High	High	1	0		0
High	Master Protein	G7IR70	Ubiquitinyl hydrolase 1 OS=Medicago truncatula GN=MTR_2g081180 PE=3 SV=2	0	45.248	13	10	13	10	802	88.9	5.07	49.22	10	Not Found	Not Found	Not Found	High	Not Found	Not Found	Not Found	Not Found	Not Found	High	High	Not Found	Not Found	Not Found	Not Found	Not Found	Not Found	High	Not Found	High	High	Not Found	High	High	1	0		0
High	Master Protein	G7KG24	Rossmann-fold NAD(P)-binding domain protein OS=Medicago truncatula GN=MTR_5g077840 PE=4 SV=1	0	100.77	28	10	36	10	459	50.8	6.77	175.24	10	Not Found	High	High	High	High	High	High	High	High	Not Found	High	High	High	High	Not Found	Not Found	Not Found	Not Found	High	High	High	High	High	High	1	0		0
High	Master Protein	G7JH60	30S ribosomal protein S3 OS=Medicago truncatula GN=rps3 PE=2 SV=1	0	65.594	32	10	59	10	214	24.5	9.91	203.35	10	Not Found	High	High	High	High	High	High	High	High	High	High	High	High	High	High	High	High	High	High	High	High	High	High	High	1	0		0
High	Master Protein	A0A072VG42	Fatty acid hydroperoxide lyase OS=Medicago truncatula GN=MTR_1g034330 PE=3 SV=1	0	51.792	24	13	40	10	489	55.1	7.65	106.98	13	Not Found	High	High	High	High	High	High	Medium	Not Found	High	Not Found	High	High	High	High	Not Found	Not Found	High	High	High	High	High	High	High	1	0		0
High	Master Protein	A0A072VGT5	Vacuolar-sorting receptor OS=Medicago truncatula GN=MTR_2g437910 PE=4 SV=1	0	65.513	15	10	27	10	624	69.9	5.66	109.2	10	Not Found	High	High	Not Found	Not Found	High	High	High	Not Found	High	High	Not Found	High	Not Found	High	High	Not Found	High	High	Not Found	Not Found	High	High	High	1	0		0
High	Master Protein	G7KD96	ABC1 family kinase OS=Medicago truncatula GN=MTR_5g068050 PE=4 SV=1	0	60.736	23	10	21	10	534	59.5	6.96	85.26	10	Not Found	Not Found	High	High	Not Found	High	High	High	Not Found	High	High	High	High	High	Not Found	Not Found	Not Found	Not Found	High	Not Found	High	High	Not Found	Not Found	1	0		0		Deamidated [Q73]
High	Master Protein	B7FJY9	Chlorophyll a-b binding protein, chloroplastic OS=Medicago truncatula GN=MTR_3g435460 PE=2 SV=1	0	121.178	40	10	95	10	253	27.7	6.93	438.04	10	High	High	High	High	High	High	High	High	Not Found	High	High	High	High	High	High	High	Not Found	High	High	High	High	High	High	High	1	0		0		Deamidated [R100; Q158; Q168]
High	Master Protein	A0A072V786	Cytochrome P450 family 71 protein OS=Medicago truncatula GN=MTR_3g058400 PE=3 SV=1	0	75.776	20	11	19	10	508	57.8	8.05	83.16	11	Not Found	High	High	High	Not Found	Not Found	Not Found	Not Found	Not Found	High	High	Not Found	Not Found	Not Found	High	Not Found	Not Found	Not Found	Not Found	High	High	Not Found	Not Found	Not Found	1	0		0
High	Master Protein	A0A072TYP7	Peptidylprolyl isomerase OS=Medicago truncatula GN=MTR_7g053470 PE=4 SV=1	0	65.707	26	10	16	10	544	61.3	5.16	69.33	10	High	High	High	High	High	Not Found	Not Found	High	High	High	Not Found	Not Found	Not Found	Not Found	Not Found	Not Found	High	Not Found	Not Found	Not Found	Not Found	Not Found	Not Found	Not Found	1	0		0
High	Master Protein	A0A072VAU6	DUF2921 family protein OS=Medicago truncatula GN=MTR_2g079300 PE=4 SV=1	0	42.336	12	11	25	10	915	104.1	7.25	81.69	11	High	High	High	Not Found	High	High	High	Not Found	Not Found	Not Found	High	Not Found	High	High	Not Found	High	High	Not Found	High	High	High	High	High	High	1	0		0
High	Master Protein	A0A072VP00	Substrate carrier family protein OS=Medicago truncatula GN=MTR_1g095780 PE=3 SV=1	0	65.179	20	10	22	10	613	67.9	8.21	94.56	10	Not Found	Not Found	High	High	High	High	High	High	Not Found	Not Found	High	Not Found	Not Found	Not Found	High	High	Not Found	Not Found	High	Not Found	High	Not Found	High	High	1	0		0
High	Master Protein	I3SDG7	F0F1-type ATP synthase, delta subunit OS=Medicago truncatula GN=MTR_3g028730 PE=2 SV=1	0	48.833	44	10	53	10	244	26.7	9.72	140.14	10	High	High	Medium	High	High	High	High	High	Not Found	Not Found	High	High	High	High	High	High	High	High	High	High	High	High	High	High	1	0		0
High	Master Protein	G7IU11	Phototropic-responsive NPH3 family protein OS=Medicago truncatula GN=MTR_5g016060 PE=3 SV=1	0	42.798	16	11	27	10	630	70.3	7.02	73.77	11	Not Found	Not Found	High	High	High	High	High	High	Not Found	High	High	High	High	High	Medium	Not Found	Not Found	High	High	High	High	High	High	High	1	0		0
High	Master Protein	A0A072UMA6	Phosphoribulokinase/uridine kinase-like protein OS=Medicago truncatula GN=MTR_4g073890 PE=4 SV=1	0	64.445	21	12	31	10	687	76.8	8.41	120.5	12	Not Found	High	High	Not Found	High	Not Found	Not Found	High	Not Found	Not Found	High	High	Not Found	High	High	High	Not Found	Not Found	High	High	High	High	High	Not Found	1	0		0
High	Master Protein	A0A072V233	LRR receptor-like kinase OS=Medicago truncatula GN=MTR_3g110860 PE=3 SV=1	0	50.416	10	11	32	10	986	109.1	6.7	93.46	11	Not Found	High	High	High	Not Found	High	High	High	Not Found	High	Not Found	High	Not Found	High	High	High	Not Found	Not Found	Not Found	High	Not Found	High	High	High	1	0		0
High	Master Protein	G7K139	Non-specific serine/threonine protein kinase OS=Medicago truncatula GN=MTR_5g014700 PE=3 SV=2	0	53.18	14	11	30	10	1014	111	6.51	111	11	Not Found	Not Found	Not Found	High	High	High	High	High	Not Found	Not Found	Not Found	High	High	High	Not Found	High	Not Found	Not Found	Not Found	High	High	High	High	High	1	0		0
High	Master Protein	B7FI20	Syntaxin of plants 122 protein OS=Medicago truncatula GN=MTR_1g056550 PE=2 SV=1	0	35.274	36	10	22	10	306	34.8	8.51	89.56	10	Not Found	High	High	High	High	Not Found	Not Found	Not Found	Not Found	Not Found	High	High	High	High	Not Found	Medium	Not Found	Not Found	Not Found	High	High	High	Not Found	Not Found	1	0		0
High	Master Protein	G7J7V4	Cysteine-rich RLK (Receptor-like kinase) protein OS=Medicago truncatula GN=MTR_3g064080 PE=4 SV=2	0	91.048	26	13	41	10	644	70.4	8.28	151.72	13	High	High	High	Not Found	High	Not Found	High	Not Found	Not Found	High	High	High	High	High	Not Found	High	Not Found	High	High	High	Not Found	Not Found	Not Found	High	1	0		0
High	Master Protein	A0A072VAA5	Succinate-semialdehyde dehydrogenase OS=Medicago truncatula GN=MTR_2g067660 PE=3 SV=1	0	90.986	24	10	38	10	522	55.8	6.92	182.03	10	Not Found	Not Found	High	High	High	High	High	High	Not Found	Not Found	High	High	High	High	High	High	Not Found	Not Found	High	High	Not Found	Not Found	High	High	1	0		0
High	Master Protein	G7L8T3	Guanosine nucleotide diphosphate dissociation inhibitor OS=Medicago truncatula GN=MTR_8g088620 PE=2 SV=1	0	50.073	26	10	34	10	444	49.7	5.88	96.29	10	High	High	High	Not Found	High	High	High	High	High	High	High	High	High	High	High	High	High	High	High	High	High	High	High	High	1	0		0
High	Master Protein	G7JQK5	Saccharopine dehydrogenase OS=Medicago truncatula GN=MTR_4g076230 PE=4 SV=2	0	76.875	27	10	57	10	422	45.5	7.36	207.59	10	High	Not Found	Not Found	Not Found	High	High	High	High	High	Not Found	High	High	High	High	High	High	High	Not Found	Not Found	Not Found	High	High	High	High	1	0		0
High	Master Protein	B7FKU7	Cysteine synthase OS=Medicago truncatula GN=MTR_5g006340 PE=2 SV=1	0	93.246	42	11	48	10	325	34.2	5.82	248.23	11	Not Found	High	Not Found	High	High	High	High	High	Not Found	Not Found	High	Not Found	High	High	High	High	Not Found	Not Found	High	Not Found	Not Found	High	High	High	1	0		0
High	Master Protein	G7IUC2	Xanthine dehydrogenase/oxidase OS=Medicago truncatula GN=MTR_2g098030 PE=4 SV=2	0	42.797	8	10	16	10	1360	149.9	6.84	50.82	10	Not Found	Not Found	Not Found	High	High	High	High	Not Found	Not Found	Not Found	Not Found	Not Found	Not Found	High	Not Found	High	Not Found	Not Found	Not Found	High	High	High	Not Found	High	1	0		0
High	Master Protein	G7JDV5	Protein disulfide-isomerase 5-3 OS=Medicago truncatula GN=MTR_4g080800 PE=4 SV=1	0	97.936	31	10	32	10	477	53.4	8	157.7	10	Not Found	Not Found	High	High	High	High	High	High	Not Found	Not Found	High	Medium	High	High	High	High	Not Found	Not Found	Not Found	High	Not Found	High	High	High	1	0		0		Deamidated [R362]
High	Master Protein	A0A072W2I7	Prolyl oligopeptidase family protein OS=Medicago truncatula GN=MTR_1g115230 PE=4 SV=1	0	44.634	15	10	15	10	702	80.1	6.74	60.28	10	Not Found	High	High	Not Found	Not Found	Not Found	High	Not Found	Not Found	Not Found	Medium	High	High	High	High	High	Not Found	Not Found	Not Found	High	High	Not Found	High	High	1	0		0
High	Master Protein	G7KW72	S-acyltransferase OS=Medicago truncatula GN=MTR_7g083480 PE=3 SV=1	0	57.744	25	11	25	10	433	48.8	8.32	104.63	11	Not Found	Not Found	High	High	High	Not Found	Not Found	High	High	High	High	Not Found	High	Not Found	Not Found	Medium	High	Not Found	High	High	High	Not Found	Not Found	Not Found	1	0		0
High	Master Protein	A0A072VPJ2	NADP-dependent malate dehydrogenase OS=Medicago truncatula GN=MTR_1g090730 PE=4 SV=1	0	63.677	22	10	31	10	437	47.9	7.02	131.57	10	High	Not Found	High	High	High	High	High	High	Not Found	Not Found	Not Found	High	High	High	High	High	Not Found	Not Found	High	High	High	High	High	Not Found	1	0		0
High	Master Protein	G7JCN5	Trehalose-6-phosphate synthase domain protein OS=Medicago truncatula GN=MTR_4g080160 PE=4 SV=1	0	59.056	13	11	19	10	861	97.5	5.78	76.36	11	Not Found	Not Found	High	High	Not Found	Not Found	High	High	Not Found	High	High	Not Found	High	High	High	High	Not Found	High	Not Found	High	High	High	High	High	1	0		0
High	Master Protein	A0A072UZF4	Endoplasmic reticulum vesicle transporter OS=Medicago truncatula GN=MTR_3g081480 PE=4 SV=1	0	65.607	26	10	25	10	355	40.5	6.92	101.2	10	Not Found	High	High	High	High	High	High	High	Not Found	Not Found	High	High	High	High	Not Found	Not Found	Not Found	Not Found	High	High	High	High	Not Found	Not Found	1	0		0
High	Master Protein	A0A072U5V1	Nucleoside diphosphate kinase OS=Medicago truncatula GN=MTR_8g099450 PE=3 SV=1	0	81.452	36	10	104	10	234	25.4	8.7	388.91	10	High	High	High	High	High	High	High	High	Not Found	High	High	High	High	High	High	High	High	High	High	High	High	High	High	High	1	0		0
High	Master Protein	G7JI05	Glucose-1-phosphate adenylyltransferase OS=Medicago truncatula GN=MTR_4g131760 PE=3 SV=2	0	85.151	31	11	30	10	521	57.5	7.78	138.58	11	Not Found	Not Found	Not Found	High	Not Found	High	High	High	Not Found	Not Found	Not Found	High	High	High	High	High	Not Found	Not Found	Not Found	High	High	High	High	High	1	0		0
High	Master Protein	A6NA79	Catalytic/protein phosphatase type 2C OS=Medicago truncatula GN=MTR_7g080170 PE=2 SV=1	0	46.85	21	10	20	10	502	55.9	6.14	71.56	10	Not Found	Not Found	High	High	Not Found	High	High	High	Not Found	Not Found	Not Found	High	Not Found	Not Found	High	High	Not Found	Not Found	High	High	Not Found	High	Not Found	High	1	1	Phospho [S23]	0		Phospho [S23]
High	Master Protein	G7L571	UDP-glucose 6-dehydrogenase OS=Medicago truncatula GN=MTR_7g012950 PE=3 SV=1	0	87.352	39	14	47	10	480	52.9	5.99	156.64	14	Not Found	High	Not Found	High	High	High	High	High	Not Found	Not Found	Not Found	High	High	High	High	High	Not Found	Not Found	High	High	High	High	High	High	1	0		0
High	Master Protein	G7K283	Ferritin OS=Medicago truncatula GN=MTR_5g083170 PE=2 SV=1	0	86.953	45	11	58	10	249	27.9	6.13	236.37	11	Not Found	High	High	High	High	High	High	High	Not Found	Not Found	High	High	High	High	High	High	Not Found	Not Found	Not Found	High	High	High	High	High	1	0		0		Deamidated [Q212]
High	Master Protein	G7J9Y9	Delta-1-pyrroline-5-carboxylate synthetase OS=Medicago truncatula GN=MTR_3g069080 PE=3 SV=2	0	73.88	23	13	39	10	715	77.7	6.87	133.46	13	Not Found	High	High	High	High	High	High	High	Not Found	Not Found	High	High	High	High	High	High	Not Found	Not Found	High	High	High	High	High	High	1	0		0
High	Master Protein	G7J0Z5	Photosystem I P700 chlorophyll A apoprotein A2 OS=Medicago truncatula GN=MTR_3g035600 PE=3 SV=2	0	434.885	22	39	1027	10	1503	167.9	7.28	3295.22	39	High	High	High	High	High	High	High	High	High	High	High	High	High	High	High	High	High	High	High	High	High	High	High	High	1	1	Phospho [S1234]	0		Deamidated [Q49; R268; Q745; Q779; Q783; Q1221; Q1230; Q1233; R1259]; Phospho [S1234]; Carboxymethyl [K27; K52; K588]
High	Master Protein	A0A072UC80	LRR receptor-like kinase plant OS=Medicago truncatula GN=MTR_6g090615 PE=4 SV=1	0	75.145	17	10	22	10	897	100	6.28	110.31	10	Not Found	High	High	Not Found	High	High	High	High	Not Found	High	High	High	Not Found	High	Not Found	High	Not Found	High	High	Not Found	Not Found	High	High	High	1	0		0
High	Master Protein	G7JEA0	Trehalose-6-phosphate synthase domain protein OS=Medicago truncatula GN=MTR_4g129270 PE=4 SV=1	0	49.77	14	10	16	10	845	96.1	6.44	56.48	10	Not Found	Not Found	Not Found	High	Not Found	High	High	Not Found	Not Found	High	High	Not Found	Not Found	High	High	Not Found	Not Found	High	Not Found	High	Not Found	High	High	Not Found	1	0		0
High	Master Protein	G7JB13	Serine/threonine-protein kinase OS=Medicago truncatula GN=MTR_3g107070 PE=3 SV=2	0	51.054	17	12	37	10	798	88.4	6.79	104.67	12	Not Found	Medium	High	Not Found	Not Found	High	High	High	Not Found	Not Found	High	High	High	High	High	High	Not Found	Not Found	High	Not Found	Not Found	High	High	High	1	0		0
High	Master Protein	A0A072TS21	Lycopene beta/epsilon cyclase OS=Medicago truncatula GN=MTR_8g465870 PE=4 SV=1	0	66.349	17	10	35	10	579	64.4	7.2	139.15	10	Not Found	Not Found	Not Found	High	High	Not Found	High	High	Not Found	Not Found	Not Found	High	High	Not Found	High	High	Not Found	Not Found	Not Found	High	High	High	High	High	1	0		0
High	Master Protein	A0A072U091	Electron transport SCO1/SenC family protein, putative OS=Medicago truncatula GN=MTR_7g069070 PE=4 SV=1	0	86.477	30	10	55	10	329	36.7	7.34	253.55	10	Not Found	Not Found	High	High	High	High	High	High	Not Found	High	High	Not Found	High	High	High	High	Not Found	High	High	High	High	High	High	High	1	0		0
High	Master Protein	G7II78	Pre-mRNA-processing-splicing factor 8 OS=Medicago truncatula GN=MTR_2g103960 PE=4 SV=2	0	37.268	4	10	12	10	2356	275.5	8.7	36.99	10	Not Found	Not Found	High	Not Found	High	Not Found	Not Found	Not Found	Not Found	Not Found	Not Found	Not Found	Not Found	High	Not Found	High	High	Not Found	Not Found	High	Not Found	High	High	High	1	0		0
High	Master Protein	G7I8M8	Photosystem II reaction center PsbP family protein OS=Medicago truncatula GN=MTR_1g083110 PE=4 SV=1	0	44.887	23	10	36	10	283	31.3	8.72	111.99	10	High	Not Found	High	High	High	High	High	High	Not Found	Not Found	High	High	Not Found	High	Not Found	Not Found	Not Found	Not Found	High	High	Not Found	High	High	Not Found	1	0		0
High	Master Protein	G7J9I2	Aldo/keto reductase family oxidoreductase OS=Medicago truncatula GN=MTR_3g083130 PE=4 SV=1	0	42.801	33	10	18	10	315	35.1	5.96	60.54	10	Not Found	Not Found	High	High	High	Not Found	High	High	Not Found	High	Not Found	High	Not Found	High	High	High	Not Found	Medium	Medium	High	High	Not Found	High	Not Found	1	0		0
High	Master Protein	A0A072U6L4	Glycyl-tRNA synthetase/glycine-tRNA ligase OS=Medicago truncatula GN=MTR_7g406850 PE=4 SV=1	0	95.391	29	19	63	10	686	77	6.55	218.21	19	High	High	High	High	Not Found	High	High	High	Not Found	High	High	High	High	Not Found	High	High	High	High	High	High	High	High	High	High	1	0		0
High	Master Protein	A0A072TUC0	Monodehydroascorbate reductase OS=Medicago truncatula GN=MTR_8g098910 PE=4 SV=1	0	60.581	27	10	15	10	496	53.9	8.22	50.35	10	Not Found	Not Found	Not Found	Medium	High	High	Not Found	High	Not Found	Not Found	High	High	Not Found	High	Not Found	High	Not Found	Not Found	Not Found	High	Not Found	Not Found	High	High	1	0		0
High	Master Protein	B7FJJ4	Pyruvate dehydrogenase E1 beta subunit OS=Medicago truncatula GN=MTR_7g005380 PE=2 SV=1	0	73.06	29	10	60	10	361	38.9	6.11	226.16	10	Not Found	Not Found	High	High	High	High	High	High	Not Found	Not Found	High	High	High	High	High	High	Not Found	Not Found	High	High	High	High	High	High	1	0		0
High	Master Protein	G7J0B8	Peroxisomal targeting signal 1 receptor OS=Medicago truncatula GN=MTR_3g009230 PE=4 SV=2	0	65.119	20	10	20	10	744	82.8	4.87	71.81	10	Not Found	High	High	High	High	Not Found	High	High	Not Found	Not Found	High	High	High	Not Found	High	High	Not Found	Not Found	Not Found	High	Not Found	High	High	High	1	0		0		Deamidated [R510]
High	Master Protein	I3SBH6	Glutathione peroxidase OS=Medicago truncatula GN=MTR_7g094600 PE=2 SV=1	0	65.43	40	10	75	10	170	19.2	9.1	271.19	10	Not Found	High	High	High	High	High	High	High	Not Found	Not Found	High	High	High	High	High	High	Not Found	Not Found	High	High	High	High	High	High	1	0		0		Deamidated [R106]
High	Master Protein	G7ZWQ4	NADH dehydrogenase [ubiquinone] iron-sulfur protein OS=Medicago truncatula GN=MTR_8g010570 PE=3 SV=1	0	66.376	33	10	40	10	242	27.9	5.43	140.57	10	Not Found	High	High	High	High	High	High	High	Not Found	High	Not Found	Not Found	High	High	Not Found	Not Found	High	High	High	High	High	High	Not Found	High	1	0		0		Deamidated [R226]
High	Master Protein	A0A072U5Q9	Trypsin-like serine protease OS=Medicago truncatula GN=MTR_6g011810 PE=4 SV=1	0	70.619	25	10	33	10	458	48.6	6.57	133.08	10	Not Found	Not Found	High	High	High	High	High	Not Found	Not Found	Not Found	High	Not Found	High	High	High	Not Found	Not Found	Not Found	High	High	High	High	High	Not Found	1	0		0
High	Master Protein	A0A072V8W6	Cytochrome P450 family 709 protein OS=Medicago truncatula GN=MTR_2g072250 PE=3 SV=1	0	86.672	30	15	61	10	516	59.4	8.85	205.26	15	Not Found	High	High	High	High	High	High	High	Not Found	Not Found	High	High	Not Found	High	High	High	Not Found	Not Found	Not Found	High	High	High	High	High	1	0		0
High	Master Protein	G7IQY1	Plant/F14G9-20 protein OS=Medicago truncatula GN=MTR_2g066060 PE=2 SV=2	0	55.679	28	10	33	10	392	43.5	6.55	119.14	10	Not Found	High	High	High	High	Not Found	High	High	Not Found	High	High	High	High	High	High	High	Not Found	High	High	High	High	High	High	High	1	2	Phospho [T151; T159]	0		Phospho [T151; T159]
High	Master Protein	G7IKV9	Obg-like ATPase 1 OS=Medicago truncatula GN=MTR_2g030370 PE=3 SV=1	0	74.35	32	10	31	10	394	44.3	6.99	126.88	10	Not Found	High	High	Not Found	High	High	High	High	Not Found	Not Found	High	Not Found	Not Found	High	High	High	Not Found	Not Found	High	High	Not Found	High	High	High	1	0		0
High	Master Protein	I3SSX1	Proteasome subunit alpha type OS=Medicago truncatula GN=MTR_1g112250 PE=2 SV=1	0	63.047	44	10	24	10	237	26	4.75	89.74	10	Not Found	High	High	High	High	High	Not Found	Not Found	Not Found	Not Found	High	High	High	High	Not Found	High	Not Found	Not Found	High	High	High	High	High	Not Found	1	0		0
High	Master Protein	G7LAQ9	Serine/Threonine kinase domain protein OS=Medicago truncatula GN=MTR_8g005720 PE=4 SV=2	0	116.731	23	14	79	10	526	58.8	9.39	370.52	14	High	High	High	High	High	High	High	High	High	High	High	High	High	High	High	High	High	Not Found	High	Not Found	High	High	High	High	1	0		0
High	Master Protein	A0A072V987	Class I glutamine amidotransferase superfamily protein OS=Medicago truncatula GN=MTR_2g078060 PE=4 SV=1	0	63.488	25	10	28	10	440	46.8	7.23	113.53	10	Not Found	High	High	Not Found	Not Found	Not Found	Not Found	Not Found	Not Found	High	High	Not Found	Not Found	High	High	High	Not Found	High	High	High	Not Found	High	High	High	1	0		0
High	Master Protein	G7KCW0	Dihydropyrimidinase OS=Medicago truncatula GN=MTR_5g089200 PE=4 SV=1	0	41.314	15	11	37	10	534	58.4	6.21	123.21	11	Not Found	Not Found	Not Found	High	High	High	High	High	Not Found	High	High	Not Found	High	High	High	High	Not Found	High	Not Found	Not Found	High	Not Found	Not Found	High	1	0		0		Deamidated [Q381; R392]
High	Master Protein	G7JAT4	Long-chain-fatty-acid CoA ligase (AMP-forming) OS=Medicago truncatula GN=MTR_3g084470 PE=4 SV=2	0	79.12	18	11	38	10	715	80	8.24	129.49	11	Not Found	High	High	High	High	High	High	High	Not Found	Not Found	High	High	High	High	High	High	Not Found	Not Found	High	High	High	High	High	Not Found	1	0		0
High	Master Protein	G7KN19	Plant/T32G24-2 protein OS=Medicago truncatula GN=MTR_6g084190 PE=4 SV=1	0	78.96	23	10	29	10	693	77.3	7.78	140.06	10	Not Found	Not Found	High	High	High	High	High	High	Not Found	Not Found	High	High	Not Found	High	High	High	Not Found	Not Found	Not Found	High	High	High	High	Not Found	1	0		0
High	Master Protein	G7KY75	LRR receptor-like kinase OS=Medicago truncatula GN=MTR_7g074010 PE=3 SV=2	0	47.162	13	13	39	10	962	107.5	7.43	96.3	13	Not Found	Not Found	Medium	High	High	High	High	Not Found	Not Found	Not Found	Medium	High	High	High	Not Found	Not Found	Not Found	Not Found	High	High	High	High	Not Found	Not Found	1	0		0
High	Master Protein	B7FGM0	Type II peroxiredoxin OS=Medicago truncatula GN=MTR_2g022660 PE=2 SV=1	0	74.806	53	10	48	10	199	21.5	8.35	190.54	10	High	High	High	High	High	High	High	Not Found	Not Found	Not Found	High	Medium	High	High	High	High	High	High	High	High	High	High	High	High	1	0		0
High	Master Protein	G7KYN5	TCP-1/cpn60 chaperonin family protein OS=Medicago truncatula GN=MTR_7g113470 PE=3 SV=1	0	54.308	20	10	17	10	527	56.9	5.58	65.25	10	High	High	High	High	High	Not Found	Not Found	Not Found	Not Found	High	Not Found	Not Found	Not Found	Not Found	Not Found	Not Found	High	High	High	High	High	High	Not Found	Not Found	1	0		0
High	Master Protein	A2Q5C4	Methyltransferase PMT16, putative OS=Medicago truncatula GN=MTR_7g076150 PE=4 SV=1	0	45.58	20	11	23	10	589	66.7	8.82	82.67	11	High	Not Found	High	Not Found	High	High	Not Found	Not Found	Not Found	High	High	High	Not Found	High	High	High	High	Not Found	Not Found	High	High	High	High	High	1	0		0		Deamidated [Q233; Q235]
High	Master Protein	G7LF15	Aldehyde dehydrogenase OS=Medicago truncatula GN=MTR_8g094600 PE=3 SV=2	0	43.042	18	11	48	10	543	59.9	6.57	108.71	11	High	Not Found	High	High	High	High	High	High	Not Found	Not Found	High	High	High	High	High	High	High	Not Found	High	High	High	High	High	High	1	0		0
High	Master Protein	A0A072U108	Peptidyl-prolyl cis-trans isomerase OS=Medicago truncatula GN=MTR_8g059435 PE=4 SV=1	0	67.294	26	10	32	10	424	46.3	5.78	138.96	10	Not Found	High	High	High	High	High	High	Not Found	Not Found	Not Found	High	High	High	High	High	High	Not Found	Not Found	High	High	High	High	High	High	1	0		0
High	Master Protein	A0A072TSJ2	Alpha amylase domain protein OS=Medicago truncatula GN=MTR_8g468990 PE=4 SV=1	0	45.753	13	10	12	10	913	102.8	5.87	42.34	10	Not Found	High	High	Not Found	Not Found	Not Found	Not Found	Not Found	Not Found	High	High	High	Not Found	Not Found	Not Found	High	Not Found	High	High	High	Not Found	High	Not Found	Not Found	1	0		0
High	Master Protein	A0A072V5N2	Methyltransferase PMT2-like protein OS=Medicago truncatula GN=MTR_3g040370 PE=4 SV=1	0	93.126	25	14	37	10	606	68.3	6.87	156.73	14	Not Found	High	High	Not Found	High	High	High	High	Not Found	Not Found	Not Found	Not Found	High	Not Found	High	High	Not Found	Not Found	Not Found	Not Found	High	Medium	High	Not Found	1	0		0
High	Master Protein	A0A072V6U4	Imidazole glycerol phosphate synthase subunit HisF OS=Medicago truncatula GN=MTR_3g052850 PE=3 SV=1	0	68.38	28	10	14	10	581	63.3	6.37	66.49	10	Not Found	Not Found	High	High	High	High	Not Found	High	Not Found	Not Found	Not Found	Not Found	Not Found	High	High	Not Found	Not Found	Not Found	Not Found	Not Found	Not Found	High	High	High	1	0		0
High	Master Protein	G7IEZ6	Chalcone-flavonone isomerase family protein OS=Medicago truncatula GN=MTR_1g115820 PE=2 SV=1	0	63.974	57	10	25	10	222	23.8	5.47	121.16	10	Not Found	High	Not Found	High	High	High	High	High	Not Found	Not Found	High	High	High	High	High	High	Not Found	High	Not Found	Not Found	High	High	High	High	1	0		0
High	Master Protein	A0A072VR75	Cobalamin biosynthesis protein OS=Medicago truncatula GN=MTR_1g115505 PE=4 SV=1	0	90.378	26	10	32	10	449	49.9	6.27	141.9	10	Not Found	Not Found	High	High	High	Not Found	Not Found	High	Not Found	Not Found	High	High	High	High	High	High	Not Found	Not Found	High	High	High	High	High	High	1	0		0
High	Master Protein	G7J6T3	Cyclic nucleotide-gated ion channel-like protein OS=Medicago truncatula GN=MTR_3g091080 PE=4 SV=2	0	37.855	13	11	21	10	713	82.3	9.31	48.14	11	High	Not Found	Not Found	High	High	High	High	Not Found	Not Found	High	Not Found	High	High	High	Not Found	Not Found	High	High	Not Found	High	High	Not Found	Not Found	Not Found	1	0		0
High	Master Protein	G7JFF2	Sucrose-phosphate synthase family protein OS=Medicago truncatula GN=MTR_4g115620 PE=4 SV=1	0	74.576	11	10	26	10	1058	117.6	6.55	108.58	10	Not Found	Not Found	High	High	High	High	High	High	Not Found	Not Found	High	Not Found	High	High	High	High	Not Found	Not Found	Not Found	High	Medium	High	Not Found	High	1	0		0
High	Master Protein	A0A072U583	D-lactate dehydrogenase (Cytochrome) OS=Medicago truncatula GN=MTR_7g107050 PE=4 SV=1	0	53.355	21	10	31	10	578	63.7	6.57	104.59	10	Not Found	High	High	High	High	High	High	High	Not Found	Not Found	High	Not Found	High	Not Found	High	Not Found	Not Found	Not Found	High	High	High	High	Not Found	Not Found	1	0		0
High	Master Protein	A0A072V1Y4	Calcium-transporting ATPase OS=Medicago truncatula GN=MTR_3g103270 PE=3 SV=1	0	58.433	12	10	17	10	1032	113.1	6.43	57.59	10	Not Found	High	High	High	High	Not Found	High	Not Found	Not Found	High	High	High	Not Found	Not Found	High	Medium	Not Found	High	High	High	High	Not Found	Not Found	Not Found	1	0		0
High	Master Protein	G7IYF8	Cellulose synthase-like protein D3 OS=Medicago truncatula GN=MTR_3g005560 PE=3 SV=1	0	62.546	26	11	34	10	428	49.1	8.06	113.51	11	Not Found	High	Not Found	High	High	High	High	Not Found	Not Found	Not Found	High	High	High	High	Not Found	High	Not Found	High	High	Not Found	High	Not Found	Not Found	Not Found	1	0		0
High	Master Protein	G7I4H1	Patatin OS=Medicago truncatula GN=MTR_1g019940 PE=3 SV=1	0	82.619	31	10	32	10	417	46	6.21	170.93	10	Not Found	Not Found	High	High	High	Not Found	High	High	Not Found	Not Found	High	High	Not Found	Not Found	High	High	Not Found	Not Found	High	High	Not Found	Not Found	High	High	1	0		0
High	Master Protein	A0A072UCH3	Co-chaperone GrpE family protein OS=Medicago truncatula GN=MTR_7g087250 PE=3 SV=1	0	69.42	26	10	24	10	290	32	5.19	97.36	10	High	High	High	Not Found	High	High	High	High	High	High	High	Not Found	Not Found	Not Found	Not Found	Not Found	Not Found	High	High	High	Not Found	Not Found	Not Found	Not Found	1	0		0
High	Master Protein	G7K6J9	Rubredoxin family protein OS=Medicago truncatula GN=MTR_5g008050 PE=2 SV=2	0	178.296	35	10	230	10	273	28.6	9.67	1080.93	10	High	High	High	High	High	High	High	High	High	High	High	High	High	High	High	High	High	High	High	High	High	High	High	High	1	2	Phospho [S124; T150]	0		Deamidated [Q100; R119; Q127; R165]; Phospho [S124; T150]; Carboxymethyl [K92; K155]
High	Master Protein	A0A072VPP4	Glycosyltransferase OS=Medicago truncatula GN=MTR_1g022025 PE=3 SV=1	0	69.095	26	12	33	10	428	48.5	8.38	127.26	12	High	High	High	High	Not Found	High	High	Not Found	Not Found	Not Found	High	High	Not Found	High	Not Found	Not Found	High	Not Found	High	High	High	Not Found	Not Found	Not Found	1	0		0
High	Master Protein	B7FIA7	Reticulon-like protein OS=Medicago truncatula GN=MTR_8g099060 PE=2 SV=1	0	90.151	26	12	133	10	260	29.3	9.03	423.69	12	High	High	High	High	High	High	High	High	High	High	High	High	High	High	High	High	High	High	High	High	High	High	High	High	1	1	Phospho [S47]	0		Phospho [S47]
High	Master Protein	A0A072V9T0	LRR receptor-like kinase OS=Medicago truncatula GN=MTR_2g073650 PE=4 SV=1	0	105.543	20	19	76	10	1010	111.3	6.27	242.84	19	Not Found	Not Found	High	High	High	High	High	High	Not Found	Not Found	Not Found	High	High	High	Not Found	High	Not Found	Not Found	Not Found	High	Not Found	High	High	High	1	0		0		Deamidated [Q217]
High	Master Protein	G7KJN8	Transmembrane 9 superfamily member OS=Medicago truncatula GN=MTR_6g074910 PE=3 SV=1	0	45.181	15	10	47	10	588	67.8	7.24	162.4	10	Not Found	High	Not Found	High	High	High	High	High	Not Found	High	High	High	High	High	High	High	High	Not Found	High	High	High	High	High	High	1	0		0
High	Master Protein	G7KWE8	Fungal proteinase A, aspartic proteinase superfamily protein OS=Medicago truncatula GN=MTR_7g111530 PE=3 SV=1	0	93.509	20	10	93	10	504	55.2	6.46	380.1	10	High	High	High	High	High	High	High	High	Not Found	High	High	High	High	High	High	High	Not Found	High	High	High	High	High	High	High	1	0		0
High	Master Protein	A0A072UVX2	ADP/ATP carrier protein OS=Medicago truncatula GN=MTR_3g028590 PE=3 SV=1	0	172.937	43	28	323	10	389	42.3	9.79	1021.59	28	High	High	High	High	High	High	High	High	High	High	High	High	High	High	High	High	High	High	High	High	High	High	High	High	1	0		0		Deamidated [Q118; Q120; Q236; Q340; Q341; Q376]; Carboxymethyl [K141]
High	Master Protein	G7KXT9	Heat shock cognate 70 kDa protein OS=Medicago truncatula GN=MTR_7g024580 PE=3 SV=1	0	383.775	59	40	269	10	649	71	5.19	1224.61	40	Not Found	High	High	High	High	High	High	High	Not Found	Not Found	High	High	Not Found	High	Not Found	High	Not Found	Not Found	Not Found	Not Found	High	High	High	High	1	0		0		Deamidated [Q158; R307; Q407]; Carboxymethyl [K367]
High	Master Protein	G7LH36	Aspartokinase-homoserine dehydrogenase OS=Medicago truncatula GN=MTR_8g083210 PE=4 SV=2	0	43.525	14	10	11	10	916	100.5	7.4	42.97	10	High	High	Not Found	High	Not Found	Not Found	Not Found	Not Found	Not Found	Not Found	High	Not Found	Not Found	Not Found	Not Found	High	Not Found	High	Not Found	Medium	Not Found	Not Found	Not Found	High	1	0		0
High	Master Protein	G7K0K7	Emp24/gp25L/p24 family protein OS=Medicago truncatula GN=MTR_5g098250 PE=2 SV=1	0	126.523	55	10	47	10	214	24.8	6.34	236.17	10	Not Found	High	High	High	High	High	High	Not Found	Not Found	Not Found	High	High	High	High	High	High	Not Found	Not Found	High	High	High	High	Not Found	High	1	0		0
High	Master Protein	G7I3K9	Vacuolar protein sorting-associated-like protein OS=Medicago truncatula GN=MTR_1g019500 PE=4 SV=1	0	41.079	11	10	18	10	968	110.2	6.13	51.1	10	Not Found	Not Found	High	Not Found	High	High	Not Found	High	Not Found	Not Found	High	Not Found	High	High	Not Found	High	High	Not Found	High	High	High	High	Not Found	Medium	1	0		0
High	Master Protein	A0A072V7D4	Multidrug resistance protein ABC transporter family protein OS=Medicago truncatula GN=MTR_2g436710 PE=4 SV=1	0	254.345	22	32	172	10	1501	168	7.99	662.01	32	High	Not Found	High	High	High	High	High	High	Not Found	Not Found	Not Found	High	High	High	High	Not Found	Not Found	Not Found	Not Found	High	High	High	High	Not Found	1	1	Phospho [S893]	0		Deamidated [Q1349]; Phospho [S893]
High	Master Protein	G7IEW2	Beta-D-xylosidase-like protein OS=Medicago truncatula GN=MTR_1g106860 PE=4 SV=1	0	47.484	13	10	18	10	781	85.3	7.21	60.39	10	High	Not Found	High	Not Found	High	Not Found	Not Found	Not Found	Not Found	High	High	High	High	High	Not Found	Not Found	High	High	High	High	High	High	Not Found	Not Found	1	0		0
High	Master Protein	A0A072VK55	Condensation domain protein OS=Medicago truncatula GN=MTR_1g059760 PE=4 SV=1	0	54.269	19	10	21	10	469	51.9	6.01	76.85	10	High	High	High	High	High	Not Found	Not Found	High	Not Found	High	Not Found	High	High	High	High	Not Found	Not Found	Not Found	Not Found	High	Not Found	High	High	Not Found	1	0		0
High	Master Protein	A0A072U8Y4	Phosphatidylinositolglycan class N protein OS=Medicago truncatula GN=MTR_7g038700 PE=4 SV=1	0	46.774	9	10	17	10	941	106.2	7.97	60.11	10	Not Found	High	High	Not Found	High	High	Not Found	High	Not Found	High	High	Not Found	High	High	Not Found	High	Not Found	High	Not Found	Not Found	Not Found	High	Not Found	High	1	0		0
High	Master Protein	A0A072V4J6	Fungal proteinase A, aspartic proteinase superfamily protein OS=Medicago truncatula GN=MTR_2g023910 PE=3 SV=1	0	68.942	17	10	53	10	510	55	6.44	261.31	10	Not Found	High	High	High	High	High	High	High	Not Found	Not Found	High	High	High	High	High	High	High	Not Found	Not Found	High	High	High	High	Not Found	1	0		0
High	Master Protein	A0A072UU47	Glycoside hydrolase family 1 protein OS=Medicago truncatula GN=MTR_3g026400 PE=3 SV=1	0	65.204	25	11	24	10	512	58.2	9.17	99.27	11	Not Found	Not Found	Not Found	Not Found	High	High	High	High	Not Found	Not Found	High	High	High	High	Not Found	High	Not Found	Not Found	High	Not Found	High	High	Not Found	High	1	0		0
High	Master Protein	G7IUL4	60S ribosomal L28-like protein OS=Medicago truncatula GN=MTR_2g100410 PE=4 SV=1	0	95.109	62	14	121	10	146	16.4	10.9	471.01	14	Not Found	Not Found	High	High	High	High	High	High	Not Found	Not Found	High	High	High	High	High	High	High	High	High	High	High	High	High	High	1	0		0		Deamidated [Q29]
High	Master Protein	G7KAG6	Cytochrome C oxidase, subunit VIb family protein OS=Medicago truncatula GN=MTR_5g064600 PE=2 SV=1	0	131.603	39	11	101	10	183	20.6	4.46	391.54	11	High	High	High	High	High	High	High	High	Not Found	High	High	High	High	High	High	High	High	High	High	High	High	High	High	High	1	1	Phospho [T114]	0		Deamidated [R120; Q126; R128]; Phospho [T114]
High	Master Protein	G7J8L3	MLO-like protein OS=Medicago truncatula GN=MLO PE=3 SV=1	0	121.152	23	10	67	10	517	58.4	8.95	346.17	10	High	High	High	Not Found	High	High	High	High	High	High	High	Not Found	High	High	High	High	High	High	Not Found	High	High	High	High	High	1	0		0
High	Master Protein	G7IP27	Clathrin light chain OS=Medicago truncatula GN=MTR_2g013220 PE=3 SV=1	0	60.611	31	10	39	10	313	34.4	5.02	132.2	10	High	High	Not Found	High	High	High	High	High	High	High	High	High	High	High	High	High	High	High	Not Found	High	High	Not Found	Not Found	Not Found	1	0		0
High	Master Protein	A0A072VK14	3-deoxy-manno-octulosonate cytidylyltransferase OS=Medicago truncatula GN=MTR_1g057850 PE=3 SV=1	0	123.702	21	10	68	10	596	66.6	6.3	267.76	10	High	High	High	High	High	High	High	High	High	Not Found	High	High	High	High	High	High	High	Not Found	High	High	High	High	High	High	1	0		0
High	Master Protein	G7IBV7	Light-harvesting complex I chlorophyll A/B-binding protein OS=Medicago truncatula GN=MTR_1g098280 PE=2 SV=1	0	81.166	39	10	54	10	175	19.2	9.22	211.87	10	Not Found	High	High	High	High	High	High	High	Not Found	Not Found	High	High	High	High	High	High	Not Found	Not Found	High	High	High	High	High	High	1	0		0
High	Master Protein	B7FHS4	CSL zinc finger protein OS=Medicago truncatula GN=MTR_1g056390 PE=2 SV=1	0	96.033	33	10	99	10	240	26.3	9.07	430.13	10	Not Found	High	High	High	High	High	High	High	Not Found	High	High	High	High	High	High	High	Not Found	High	High	High	High	High	High	High	1	0		0		Deamidated [Q79]
High	Master Protein	G7J8R1	M28 Zn-peptidase nicastrin OS=Medicago truncatula GN=MTR_3g065110 PE=4 SV=1	0	57.341	14	10	58	10	666	71.7	4.98	163.96	10	Not Found	High	High	High	High	High	High	High	Not Found	High	High	High	High	High	High	High	Not Found	High	High	High	High	High	High	High	1	0		0
High	Master Protein	A0A072VA76	Phototropic-responsive NPH3 family protein OS=Medicago truncatula GN=MTR_2g084595 PE=3 SV=1	0	45.538	16	10	20	10	634	70.8	7.93	72.53	10	Not Found	Not Found	High	High	High	High	High	Not Found	Not Found	High	High	Not Found	High	High	Not Found	Not Found	Not Found	High	High	High	High	High	Not Found	Not Found	1	0		0
High	Master Protein	G7K5K7	Matrix metalloproteinase OS=Medicago truncatula GN=MTR_5g036360 PE=3 SV=2	0	54.229	30	10	47	10	360	40.8	7.5	143.02	10	High	High	High	High	High	High	High	High	Not Found	Not Found	High	High	High	High	High	High	Not Found	Not Found	High	High	High	High	High	High	1	0		0
High	Master Protein	G7J420	Xylulose kinase-like protein OS=Medicago truncatula GN=MTR_3g110710 PE=4 SV=1	0	55.657	20	10	24	10	557	61.2	6.8	85.02	10	Not Found	High	High	Not Found	High	High	High	High	Not Found	High	High	High	High	High	High	High	High	High	High	High	High	High	Not Found	High	1	0		0
High	Master Protein	A0A072U2K5	Protein disulfide isomerase (PDI)-like protein OS=Medicago truncatula GN=MTR_8g064810 PE=4 SV=1	0	81.318	29	10	24	10	570	63.7	5.1	107.25	10	Not Found	High	High	High	High	Not Found	High	High	Not Found	High	Not Found	High	High	High	High	High	Not Found	High	Not Found	High	High	High	High	Not Found	1	0		0
High	Master Protein	I3S3S0	Cytosolic triosephosphate isomerase OS=Medicago truncatula GN=MTR_2g096940 PE=2 SV=1	0	104.706	41	11	82	10	253	27.2	5.92	363.28	11	Not Found	High	High	High	High	High	High	High	Not Found	High	High	High	High	High	High	High	Not Found	Not Found	High	High	High	High	High	High	1	0		0
High	Master Protein	G7KID3	UDP-glucosyltransferase family protein OS=Medicago truncatula GN=MTR_6g042310 PE=4 SV=1	0	46.204	27	13	24	10	469	53.6	6.76	76.7	13	Not Found	Not Found	High	Not Found	Not Found	High	High	Not Found	Not Found	Not Found	High	Not Found	Not Found	High	High	Not Found	Not Found	Not Found	High	High	Not Found	High	High	Not Found	1	0		0		Deamidated [Q295]
High	Master Protein	B7FHH5	50S ribosomal protein L16 OS=Medicago truncatula GN=MTR_4g034750 PE=2 SV=1	0	83.82	74	10	87	10	119	13.3	10.84	306.4	10	High	High	High	High	High	High	High	High	Not Found	High	High	High	High	High	High	High	Not Found	Not Found	High	High	High	High	High	High	1	0		0
High	Master Protein	A0A072UCC3	Substrate carrier family protein OS=Medicago truncatula GN=MTR_7g084400 PE=3 SV=1	0	39.968	22	11	26	10	488	54.5	6.55	71.21	11	Not Found	Not Found	High	High	Not Found	High	High	High	Not Found	Not Found	High	High	Not Found	High	High	High	Not Found	High	High	High	Not Found	High	High	High	1	0		0
High	Master Protein	A0A072U2N8	Dehydrogenase/reductase SDR family protein OS=Medicago truncatula GN=MTR_7g080410 PE=4 SV=1	0	77.572	37	10	52	10	296	32.4	9.07	202.47	10	Not Found	High	High	High	High	High	High	High	Not Found	Not Found	High	High	High	High	High	High	Not Found	Not Found	High	High	High	High	High	High	1	0		0		Deamidated [R107; R209]
High	Master Protein	G7LGG4	Ferrochelatase OS=Medicago truncatula GN=MTR_8g095320 PE=3 SV=1	0	122.129	20	13	76	10	527	58.8	5.35	293.92	13	Not Found	High	High	High	High	High	High	High	Not Found	High	High	High	High	High	High	High	High	High	High	High	High	High	High	Medium	1	0		0		Carboxymethyl [K291]
High	Master Protein	G7K0L3	Peroxisomal acetoacetyl-coenzyme A thiolase OS=Medicago truncatula GN=MTR_5g098310 PE=3 SV=1	0	99.825	34	10	50	10	407	41.6	6.57	204.33	10	Not Found	High	High	High	High	High	High	High	Not Found	Not Found	High	High	High	High	High	High	Not Found	High	High	High	High	High	High	High	1	0		0
High	Master Protein	G7JAX4	Actin 2 OS=Medicago truncatula GN=MTR_3g095530 PE=2 SV=2	0	248.861	66	26	237	10	377	41.7	5.49	989.06	26	Medium	High	High	High	High	High	High	High	Medium	Not Found	High	High	High	High	High	High	Not Found	High	High	High	High	High	High	High	1	0		0		Deamidated [R97; Q248]
High	Master Protein	A0A072UFR5	Ubiquitin-specific protease family C19 protein OS=Medicago truncatula GN=MTR_4g007930 PE=4 SV=1	0	110.996	21	10	41	10	436	46.5	9.6	205.07	10	Not Found	Not Found	High	High	High	High	High	Not Found	High	Not Found	High	High	High	High	High	High	High	High	Not Found	High	High	High	High	Not Found	1	1	Phospho [S76]	0		Phospho [S76]
High	Master Protein	A0A072UZY2	LRR receptor-like kinase family protein OS=Medicago truncatula GN=MTR_3g075440 PE=4 SV=1	0	104.393	19	11	33	10	628	69.9	9.13	189.98	11	High	High	High	High	Not Found	Not Found	Not Found	High	Not Found	High	High	High	Not Found	High	High	High	Not Found	High	High	High	Not Found	Not Found	Not Found	High	1	0		0
High	Master Protein	G7L3J8	DEAD-box ATP-dependent RNA helicase-like protein OS=Medicago truncatula GN=MTR_7g076800 PE=3 SV=1	0	63.682	24	10	18	10	514	58.7	8.44	84.72	10	Not Found	High	Not Found	High	High	High	Not Found	High	Not Found	High	Not Found	Not Found	High	High	Not Found	Not Found	Not Found	High	Not Found	Not Found	Not Found	High	Not Found	High	1	0		0
High	Master Protein	G7JS28	Lysine-ketoglutarate reductase/saccharopine dehydrogenase OS=Medicago truncatula GN=MTR_4g124470 PE=4 SV=1	0	48.347	12	10	20	10	1048	115.9	5.85	62.85	10	Not Found	Not Found	Not Found	High	High	Not Found	High	High	High	Not Found	Not Found	Not Found	High	High	Not Found	High	Not Found	Not Found	Not Found	High	High	High	High	High	1	0		0
High	Master Protein	A0A072V2M1	Farnesylcysteine lyase OS=Medicago truncatula GN=MTR_3g096675 PE=4 SV=1	0	63.031	24	10	46	10	499	54.9	6.54	181	10	High	High	High	High	High	High	High	High	High	High	High	High	High	High	High	High	High	Not Found	Not Found	High	High	High	High	High	1	0		0
High	Master Protein	B7FGX7	Transmembrane protein, putative OS=Medicago truncatula GN=MTR_5g007210 PE=2 SV=1	0	92.887	40	10	123	10	163	18	10.17	489.34	10	High	High	High	High	High	High	High	High	Not Found	High	High	High	High	High	High	High	Not Found	High	High	High	High	High	High	High	1	1	Phospho [S156]	0		Phospho [S156]
High	Master Protein	G7J996	Probable alanine--tRNA ligase, chloroplastic OS=Medicago truncatula GN=MTR_3g118360 PE=3 SV=2	0	40.535	11	10	18	10	980	107.7	6.3	51.36	10	Not Found	High	Not Found	High	High	Not Found	Not Found	High	Not Found	Not Found	High	Not Found	Not Found	Not Found	High	High	Not Found	High	High	High	Not Found	Not Found	High	High	1	0		0
High	Master Protein	G7KXA6	Cytochrome b-c1 complex subunit Rieske, mitochondrial OS=Medicago truncatula GN=MTR_7g084150 PE=4 SV=1	0	127.361	30	10	134	10	273	30.2	8.82	631.61	10	High	High	High	High	High	High	High	High	High	High	High	High	High	High	High	High	Not Found	High	High	High	High	High	High	High	1	0		0
High	Master Protein	A0A072VE12	Calcineurin-like metallo-phosphoesterase superfamily protein OS=Medicago truncatula GN=MTR_1g020000 PE=4 SV=1	0	60.968	10	10	25	10	1067	122.6	7.71	88.37	10	Not Found	High	High	High	High	High	Not Found	High	Not Found	High	Not Found	High	Not Found	High	High	High	Not Found	High	Not Found	Not Found	Not Found	High	High	High	1	0		0
High	Master Protein	G7JAT8	LRR receptor-like kinase OS=Medicago truncatula GN=MTR_3g084510 PE=3 SV=1	0	51.742	15	12	39	10	933	100.6	6.16	122.87	12	Not Found	High	High	Not Found	High	High	High	High	Not Found	Not Found	High	High	High	High	High	High	Not Found	Not Found	High	High	High	High	High	High	1	0		0
High	Master Protein	G7KQU5	Phospholipid/glycerol acyltransferase family protein OS=Medicago truncatula GN=MTR_7g104580 PE=4 SV=1	0	77.405	27	10	20	10	390	43.7	8.51	86.67	10	Not Found	High	High	High	High	Not Found	Not Found	Not Found	Not Found	Not Found	Not Found	Medium	High	Not Found	Not Found	High	Not Found	High	High	Not Found	High	Not Found	Not Found	High	1	1	Phospho [S39]	0		Phospho [S39]
High	Master Protein	G7J8Z9	Sigma 54 modulation protein/S30EA ribosomal protein OS=Medicago truncatula GN=MTR_3g092720 PE=4 SV=2	0	92.686	29	10	27	10	353	40	9.23	134.3	10	Not Found	High	High	High	High	Not Found	Not Found	Not Found	Not Found	Not Found	High	High	High	High	Not Found	Not Found	Not Found	Not Found	High	High	High	High	Not Found	Not Found	1	0		0
High	Master Protein	G7JG73	RNA-binding (RRM/RBD/RNP motif) family protein OS=Medicago truncatula GN=MTR_4g070140 PE=4 SV=1	0	74.547	72	11	48	10	190	18.4	5.43	168.51	11	Not Found	High	High	High	High	High	High	High	Not Found	Not Found	Not Found	High	High	High	High	Not Found	Not Found	High	Not Found	High	High	High	High	Not Found	1	0		0
High	Master Protein	G7IV31	NB-ARC domain disease resistance protein OS=Medicago truncatula GN=MTR_3g062340 PE=3 SV=2	0	64.703	8	11	16	10	1949	221.5	5.14	47.39	11	Not Found	High	Not Found	High	High	Not Found	Not Found	Not Found	Not Found	Not Found	High	High	Not Found	High	High	High	Not Found	Not Found	Not Found	High	High	Not Found	High	High	1	0		0
High	Master Protein	A0A072V120	UTP-glucose-1-phosphate uridylyltransferase OS=Medicago truncatula GN=MTR_3g088650 PE=4 SV=1	0	49.909	22	10	17	10	600	66.1	6.62	63.17	10	Not Found	High	Not Found	High	Not Found	High	Not Found	Not Found	Not Found	Not Found	Not Found	Not Found	High	Not Found	High	High	Not Found	Not Found	High	High	High	Not Found	High	High	1	0		0		Deamidated [Q162]
High	Master Protein	G7JQK3	Beta-adaptin-like protein OS=Medicago truncatula GN=MTR_4g076210 PE=3 SV=1	0	53.068	14	10	21	10	896	99.5	5.08	76.67	10	Not Found	High	High	High	Not Found	High	High	High	Not Found	High	High	Not Found	Not Found	High	High	High	High	Not Found	High	Not Found	Not Found	Not Found	Not Found	High	1	0		0
High	Master Protein	G7J4F9	Light-harvesting complex I chlorophyll A/B-binding protein OS=Medicago truncatula GN=MTR_3g088040 PE=2 SV=1	0	140.433	26	10	192	10	270	28.9	6.77	832.76	10	High	High	High	High	High	High	High	High	High	High	High	High	High	High	High	High	High	High	High	High	High	High	High	High	1	0		0		Deamidated [R181]
High	Master Protein	A0A072UVI7	Reticulon-like protein OS=Medicago truncatula GN=MTR_3g449880 PE=4 SV=1	0	83.123	39	12	69	10	241	27.1	8.25	271.96	12	Not Found	High	High	High	High	High	High	High	Not Found	Not Found	High	High	High	High	High	High	Not Found	Not Found	High	High	High	High	High	High	1	0		0		Deamidated [Q220]
High	Master Protein	A0A072VBF4	Magnesium transporter MRS2-like protein OS=Medicago truncatula GN=MTR_2g084565 PE=4 SV=1	0	67.427	25	10	30	10	444	49.9	5.9	138.91	10	High	High	Not Found	High	High	High	High	High	Not Found	High	Not Found	High	High	High	High	High	Medium	High	Not Found	High	High	High	High	High	1	0		0
High	Master Protein	B7FKU9	Cytoplasmic C-1-tetrahydrofolate synthase OS=Medicago truncatula GN=MTR_7g108580 PE=2 SV=1	0	80.611	52	10	26	10	293	31.5	7.53	136.7	10	Not Found	High	High	High	High	Not Found	Not Found	High	Not Found	High	High	Not Found	Not Found	High	High	High	Not Found	High	High	High	Not Found	High	High	High	1	0		0
High	Master Protein	G7I4S6	Uncharacterized protein OS=Medicago truncatula GN=MTR_1g075490 PE=4 SV=1	0	76.263	48	9	56	9	424	32.8	10.52	189.13	9	Not Found	High	Not Found	High	High	High	High	High	Not Found	High	High	High	High	High	High	High	Not Found	High	High	High	High	High	High	High	1	0		0
High	Master Protein	G7KGI9	Cinnamyl alcohol dehydrogenase family protein OS=Medicago truncatula GN=MTR_5g031360 PE=4 SV=1	0	55.779	31	11	40	9	363	39	7.74	132.84	11	Not Found	High	Not Found	High	High	High	High	High	Not Found	Not Found	Not Found	High	High	High	High	High	Not Found	Not Found	Not Found	High	High	High	High	High	1	0		0
High	Master Protein	A0A072TTN3	RAB GTPase-like protein A1D OS=Medicago truncatula GN=MTR_8g089985 PE=4 SV=1	0	105.143	59	15	74	9	225	24.9	5.99	230.65	15	High	High	High	High	Not Found	High	High	Not Found	Not Found	Not Found	High	High	High	High	High	High	High	High	High	High	High	High	Not Found	High	1	0		0		Deamidated [Q193]
High	Master Protein	G8A0S6	Fructose-1,6-bisphosphatase, cytosolic-like protein OS=Medicago truncatula GN=MTR_6g035305 PE=3 SV=1	0	71.966	36	11	45	9	339	37	5.88	173.24	11	Not Found	High	High	High	High	High	High	High	Not Found	High	High	High	High	High	High	Not Found	Not Found	High	High	High	High	High	Not Found	Not Found	1	0		0
High	Master Protein	A0A072TT32	Mannosyl-oligosaccharide glucosidase OS=Medicago truncatula GN=MTR_8g080360 PE=4 SV=1	0	47.22	14	11	31	9	849	97.1	7.49	91.18	11	Not Found	High	High	High	High	High	Not Found	High	Not Found	Not Found	High	High	High	Not Found	High	High	Not Found	High	High	High	High	Not Found	High	High	1	0		0
High	Master Protein	G7I883	Plastocyanin-like domain protein OS=Medicago truncatula GN=MTR_1g014120 PE=4 SV=1	0	82.889	42	9	103	9	184	19.4	7.81	403.28	9	High	High	High	High	High	High	High	High	High	Not Found	High	High	High	High	High	High	High	High	High	High	High	High	High	High	1	0		0
High	Master Protein	A2Q6E4	Protein phosphatase 2C-like OS=Medicago truncatula GN=MTR_5g063940 PE=4 SV=1	0	58.939	41	10	46	9	282	30.7	8.15	159.74	10	Not Found	High	Not Found	High	High	High	High	High	Not Found	Not Found	Not Found	Not Found	High	High	High	High	Not Found	High	High	High	High	High	High	High	1	0		0		Deamidated [Q194]
High	Master Protein	G7IHV2	PfkB family carbohydrate kinase OS=Medicago truncatula GN=MTR_2g098950 PE=3 SV=1	0	73.754	42	11	28	9	329	35.2	5.35	109.35	11	Not Found	High	High	High	Not Found	High	High	High	Not Found	Not Found	High	Not Found	Not Found	High	Not Found	High	Not Found	High	High	High	Not Found	High	Not Found	High	1	0		0
High	Master Protein	G7L4Q9	Cytochrome P450 family protein OS=Medicago truncatula GN=MTR_7g088330 PE=3 SV=1	0	63.631	21	9	29	9	508	58.3	7.24	110.44	9	Not Found	Not Found	High	High	High	High	High	High	Not Found	Not Found	High	High	Not Found	High	High	High	Not Found	High	High	High	High	High	Not Found	High	1	0		0
High	Master Protein	G7IJD1	LRR receptor-like kinase OS=Medicago truncatula GN=MTR_2g074840 PE=4 SV=2	0	88.078	16	19	84	9	1001	110.7	6.64	236.7	19	High	Not Found	High	High	Not Found	High	High	High	Not Found	Not Found	High	High	High	High	High	High	High	Not Found	Not Found	High	Not Found	High	High	High	1	0		0
High	Master Protein	A2Q5A0	Photosystem II protein D1 OS=Medicago truncatula GN=MTR_7g021750 PE=3 SV=1	0	170.494	29	11	224	9	353	39	5.25	996.23	11	High	High	High	High	High	High	High	High	High	High	High	High	High	High	High	High	High	High	High	High	High	High	High	High	1	0		0		Deamidated [R238; Q241; R269; R323]
High	Master Protein	G7ICA2	Glutamine-tRNA ligase OS=Medicago truncatula GN=MTR_1g110430 PE=3 SV=2	0	50.36	13	9	18	9	794	90.4	6.6	73.4	9	Not Found	Not Found	High	High	Not Found	High	High	Not Found	Not Found	Not Found	High	High	Not Found	High	High	Not Found	Not Found	Not Found	High	High	High	Not Found	High	Not Found	1	0		0
High	Master Protein	G7JXH2	FAD/NAD(P)-binding oxidoreductase family protein OS=Medicago truncatula GN=MTR_5g013250 PE=4 SV=1	0	99.729	34	11	46	9	431	47.4	8.32	174.09	11	Not Found	High	High	High	High	High	High	High	Not Found	High	High	Not Found	High	High	High	High	Not Found	High	Not Found	Not Found	High	High	High	High	1	0		0
High	Master Protein	B7FHA8	Peptidyl-prolyl cis-trans isomerase OS=Medicago truncatula GN=MTR_1g094065 PE=2 SV=1	0	101.786	54	10	44	9	230	25.6	8.48	250.97	10	Not Found	High	High	High	High	High	High	High	Not Found	Not Found	High	Not Found	High	High	High	High	Not Found	Not Found	High	Not Found	High	High	High	High	1	0		0
High	Master Protein	G7J060	Glutathione S-transferase, amino-terminal domain protein OS=Medicago truncatula GN=MTR_3g005720 PE=4 SV=1	0	80.241	26	9	40	9	323	36.1	6.96	172.57	9	High	High	High	High	High	High	High	High	Not Found	High	Not Found	High	High	High	High	High	High	High	High	High	High	High	High	High	1	0		0		Deamidated [R255]
High	Master Protein	A0A072TSV7	LRR and NB-ARC domain disease resistance protein OS=Medicago truncatula GN=MTR_8g479430 PE=3 SV=1	0	78.38	17	10	27	9	813	92.3	5.95	113.4	10	High	Not Found	High	Not Found	Not Found	High	High	High	Not Found	Not Found	High	Not Found	Not Found	High	High	High	Not Found	Not Found	High	Not Found	Not Found	High	High	High	1	0		0
High	Master Protein	B7FNA2	EF hand calcium-binding family protein OS=Medicago truncatula GN=MTR_5g011850 PE=2 SV=1	0	68.775	68	9	46	9	147	16.6	4.81	180.28	9	Not Found	High	High	High	High	High	High	High	Not Found	Not Found	Not Found	High	High	High	High	High	Not Found	Not Found	Not Found	High	High	High	High	High	1	0		0
High	Master Protein	G7I9C1	Pyruvate kinase OS=Medicago truncatula GN=MTR_1g061630 PE=3 SV=1	0	58.024	19	11	44	9	513	56	6.9	136.96	11	Not Found	High	Not Found	Not Found	High	High	High	High	Not Found	High	Not Found	Not Found	High	Not Found	High	High	Not Found	High	Not Found	Not Found	High	High	High	High	1	0		0
High	Master Protein	G7J8I5	Heavy metal transport/detoxification superfamily protein OS=Medicago truncatula GN=MTR_3g117890 PE=4 SV=1	0	83.987	54	10	77	9	156	17.5	8.85	349.44	10	High	High	High	High	High	High	High	High	Not Found	High	High	High	High	High	High	High	Not Found	High	High	High	High	High	High	High	1	0		0		Deamidated [Q55; Q125]; Carboxymethyl [K51]
High	Master Protein	G7IKA2	Hexosyltransferase OS=Medicago truncatula GN=MTR_2g015550 PE=3 SV=1	0	40.118	18	10	21	9	533	61.9	8.94	60.27	10	Not Found	Not Found	High	Not Found	Not Found	High	High	High	Not Found	High	High	Not Found	Not Found	Not Found	Medium	High	Not Found	High	High	High	High	Not Found	Medium	High	1	0		0
High	Master Protein	A0A072TTK9	Alpha-glucan water dikinase OS=Medicago truncatula GN=MTR_8g069760 PE=4 SV=1	0	47.519	7	9	17	9	1483	165.1	6.62	61.43	9	High	Not Found	High	Not Found	High	Not Found	High	High	Not Found	Not Found	High	High	Not Found	High	Not Found	Not Found	High	High	High	High	High	High	Not Found	Not Found	1	0		0
High	Master Protein	A0A072V5S0	Late embryogenesis abundant protein OS=Medicago truncatula GN=MTR_3g045190 PE=4 SV=1	0	80.508	37	9	42	9	310	33.9	4.94	162.96	9	Not Found	Not Found	High	High	High	High	Not Found	Not Found	Not Found	Not Found	High	High	High	High	High	High	Not Found	Not Found	High	High	High	High	High	High	1	0		0
High	Master Protein	G7JB62	Major intrinsic protein (MIP) family transporter OS=Medicago truncatula GN=MTR_3g070210 PE=3 SV=1	0	288.715	53	17	253	9	290	31	8.53	1276.45	17	High	High	High	High	High	High	High	High	High	High	High	High	High	High	High	High	High	High	High	High	High	High	High	High	1	1	Phospho [S9]	0		Deamidated [Q6; R18; Q19; Q26]; Phospho [S9]; Carboxymethyl [K4]
High	Master Protein	G7J6K1	Coatomer subunit gamma OS=Medicago truncatula GN=MTR_3g116480 PE=3 SV=1	0	91.475	18	14	33	9	887	98.6	5.21	123.77	14	Not Found	Not Found	High	High	High	Not Found	Not Found	Not Found	Not Found	Not Found	High	High	High	High	Not Found	Not Found	Not Found	Not Found	Not Found	High	High	High	Not Found	Not Found	1	0		0
High	Master Protein	A2Q5X8	LRR receptor-like kinase OS=Medicago truncatula GN=MTR_7g080810 PE=4 SV=1	0	90.005	22	12	38	9	615	67.4	7.43	160.46	12	Not Found	High	High	Not Found	Not Found	High	High	Not Found	Not Found	Not Found	High	High	Not Found	High	High	High	Not Found	High	High	High	High	High	High	High	1	0		0		Deamidated [Q189]
High	Master Protein	G7ICU7	Long-chain fatty acyl CoA ligase OS=Medicago truncatula GN=MTR_1g086600 PE=4 SV=2	0	64.51	19	11	29	9	686	77.1	7.66	121.3	11	Not Found	High	High	Not Found	High	High	High	High	Not Found	Not Found	High	Not Found	High	Not Found	High	High	Not Found	Not Found	Not Found	High	High	High	High	High	1	0		0
High	Master Protein	A0A072UNY3	Receptor-like kinase OS=Medicago truncatula GN=MTR_4g088975 PE=3 SV=1	0	53.644	32	9	17	9	367	40.9	8.69	67.07	9	Not Found	Not Found	Not Found	Not Found	High	High	High	Not Found	Not Found	Not Found	Not Found	Not Found	High	High	High	High	Not Found	Not Found	Not Found	High	High	High	High	Not Found	1	0		0
High	Master Protein	G7ZX37	Uncharacterized protein OS=Medicago truncatula GN=MTR_6g465290 PE=4 SV=1	0	37.141	37	9	16	9	242	26.4	8.37	42.82	9	Not Found	High	High	Not Found	High	High	High	Not Found	High	High	Medium	Not Found	Not Found	Not Found	Not Found	High	High	Not Found	High	Not Found	High	Not Found	Not Found	High	1	0		0
High	Master Protein	A0A072URU9	Lectin receptor kinase OS=Medicago truncatula GN=MTR_4g105070 PE=4 SV=1	0	48.519	17	9	17	9	664	73.7	5.66	68.63	9	Not Found	High	High	High	High	High	High	High	Not Found	Not Found	Not Found	High	High	Not Found	Not Found	Not Found	Not Found	Not Found	Not Found	High	High	High	Not Found	High	1	1	Phospho [S655]	0		Phospho [S655]
High	Master Protein	G7IPS8	T-complex protein 1 subunit gamma OS=Medicago truncatula GN=MTR_2g013540 PE=3 SV=2	0	39.566	15	9	23	9	555	60.4	6.27	63.95	9	Medium	High	High	High	High	Not Found	Not Found	Not Found	Not Found	High	High	High	High	Not Found	Not Found	Not Found	Not Found	High	High	High	High	Not Found	Not Found	Not Found	1	0		0
High	Master Protein	G7K2L9	Thioredoxin reductase OS=Medicago truncatula GN=MTR_5g024900 PE=3 SV=1	0	66.441	36	9	18	9	376	40.2	7.31	75.74	9	Not Found	Not Found	High	Not Found	High	Not Found	High	High	Not Found	Not Found	Not Found	High	High	High	High	High	Not Found	Not Found	High	High	High	Not Found	High	High	1	0		0
High	Master Protein	G7KF41	Carnitine/acylcarnitine carrier-like protein OS=Medicago truncatula GN=MTR_5g030530 PE=3 SV=1	0	104.343	51	12	107	9	297	30.7	9.2	340.61	12	Not Found	Not Found	High	High	High	High	High	High	Not Found	High	High	High	High	High	High	High	Not Found	Not Found	High	High	High	High	High	High	1	0		0
High	Master Protein	I3SYK2	Gamma carbonic anhydrase-like protein OS=Medicago truncatula GN=MTR_1g022405 PE=2 SV=1	0	132.432	54	13	74	9	272	29.6	6.43	349.22	13	Not Found	High	High	High	High	High	High	High	Not Found	Not Found	Not Found	High	High	High	High	High	Not Found	Not Found	Not Found	High	High	High	High	High	1	0		0
High	Master Protein	G7JRX9	Peptidyl-prolyl cis-trans isomerase OS=Medicago truncatula GN=MTR_4g111720 PE=4 SV=1	0	71.471	41	9	36	9	322	35.4	8.94	133.47	9	Not Found	Not Found	High	High	High	High	High	Not Found	Not Found	Not Found	High	High	High	High	High	High	Not Found	Not Found	High	High	Not Found	High	High	High	1	0		0
High	Master Protein	G7IHV7	Electron transfer flavoprotein-ubiquinone oxidoreductase, mitochondrial OS=Medicago truncatula GN=MTR_2g099040 PE=3 SV=2	0	155.587	41	20	90	9	542	60.3	7.99	365.32	20	Not Found	High	High	Medium	High	High	High	High	Not Found	High	High	Not Found	High	High	High	High	Not Found	Not Found	High	Not Found	High	High	High	High	1	0		0
High	Master Protein	G7L971	Pectinesterase OS=Medicago truncatula GN=MTR_8g023150 PE=4 SV=1	0	48.259	18	9	30	9	582	63.8	7.66	80.4	9	Not Found	High	High	High	Not Found	Medium	Not Found	Medium	Not Found	Not Found	High	High	High	High	Medium	High	Not Found	High	High	High	High	High	Medium	High	1	0		0
High	Master Protein	A0A072UJZ2	L-ascorbate peroxidase OS=Medicago truncatula GN=MTR_4g061140 PE=3 SV=1	0	114.924	44	9	90	9	246	26.7	5.99	389.2	9	Not Found	High	High	High	High	High	High	High	Not Found	Not Found	High	High	High	High	High	High	Not Found	Not Found	High	High	High	High	High	High	1	0		0		Deamidated [R79]
High	Master Protein	A0A072V0V9	DPP6 amino-terminal domain protein OS=Medicago truncatula GN=MTR_3g088425 PE=4 SV=1	0	59.485	15	9	20	9	684	76.5	7.02	90.07	9	Not Found	Not Found	Not Found	High	Not Found	High	High	High	Not Found	Not Found	Medium	High	Not Found	High	High	High	Not Found	Not Found	Not Found	Not Found	Not Found	Not Found	Not Found	High	1	0		0
High	Master Protein	A0A072UNM0	60S ribosomal protein L3B OS=Medicago truncatula GN=MTR_4g094398 PE=3 SV=1	0	127.754	42	25	178	9	389	44.5	10.18	512.24	25	Not Found	High	Not Found	Not Found	High	High	High	High	Not Found	Not Found	Not Found	High	High	High	High	High	Not Found	Not Found	Not Found	High	High	High	High	High	1	0		0		Deamidated [Q272; R278]
High	Master Protein	Q1SN01	High mobility group proteins HMG-I and HMG-Y; Linker histone, N-terminal OS=Medicago truncatula GN=MTR_8g106980 PE=4 SV=1	0	50.313	26	9	27	9	422	46.7	10.36	116.36	9	Not Found	High	High	Not Found	High	High	High	High	Not Found	Not Found	Not Found	High	High	High	High	High	Not Found	Not Found	High	Not Found	High	High	High	High	1	0		0
High	Master Protein	I3SXG8	Photosystem I reaction center subunit IV A OS=Medicago truncatula GN=MTR_1g069235 PE=2 SV=1	0	124.972	56	10	279	9	148	15.5	9.82	1140.99	10	High	High	High	High	High	High	High	High	High	High	High	High	High	High	High	High	High	High	High	High	High	High	High	High	1	2	Phospho [T106; S108]	0		Deamidated [Q114]; Phospho [T106; S108]
High	Master Protein	G7KLT0	DUF4336 domain protein OS=Medicago truncatula GN=MTR_6g013750 PE=4 SV=1	0	71.83	26	9	19	9	450	50.2	9.54	70.06	9	Not Found	Not Found	High	Not Found	Not Found	High	High	High	Not Found	High	Not Found	Not Found	Not Found	Not Found	High	High	Not Found	Not Found	Not Found	Not Found	Not Found	Not Found	High	High	1	0		0
High	Master Protein	A2Q2X1	Aldehyde dehydrogenase OS=Medicago truncatula GN=MTR_2g034160 PE=3 SV=1	0	50.245	15	9	28	9	595	65.5	7.75	117.48	9	High	Medium	Not Found	High	High	High	High	High	Not Found	Not Found	Not Found	High	High	High	High	High	Not Found	Not Found	Not Found	Not Found	High	High	High	High	1	0		0
High	Master Protein	G7IMC1	3-isopropylmalate dehydrogenase OS=Medicago truncatula GN=MTR_2g104610 PE=3 SV=1	0	54.298	33	9	13	9	405	43.7	6.38	53.23	9	Not Found	Not Found	High	High	High	Not Found	Not Found	Not Found	Not Found	Not Found	Medium	Not Found	Not Found	High	Not Found	Not Found	Not Found	Not Found	High	Not Found	High	High	High	High	1	0		0
High	Master Protein	A0A072TT98	Myosin heavy chain, putative OS=Medicago truncatula GN=MTR_8g089685 PE=4 SV=1	0	33.207	11	9	19	9	661	74.4	4.87	67.51	9	Not Found	High	High	High	High	High	High	Not Found	Not Found	High	High	High	High	High	Not Found	High	High	High	Not Found	High	High	High	High	Not Found	1	0		0
High	Master Protein	G7JAF8	ER membrane protein complex subunit-like protein OS=Medicago truncatula GN=MTR_3g106570 PE=2 SV=1	0	42.315	43	9	50	9	210	23.4	9.17	153.26	9	Not Found	Not Found	High	High	High	High	High	High	Not Found	Not Found	High	High	High	High	High	High	Not Found	Not Found	Not Found	High	High	High	High	High	1	0		0
High	Master Protein	G7JLE4	SNF1-related kinase regulatory subunit gamma 1 OS=Medicago truncatula GN=MTR_4g103550 PE=4 SV=1	0	42.255	22	9	18	9	432	48	5.54	51.2	9	Medium	High	High	High	High	Not Found	Medium	High	High	Not Found	Not Found	High	Not Found	Not Found	Not Found	High	High	Not Found	Not Found	High	High	Not Found	Not Found	High	1	0		0
High	Master Protein	A0A072UKS9	RIP metalloprotease RseP OS=Medicago truncatula GN=MTR_4g048590 PE=4 SV=1	0	40.969	17	9	62	9	448	48.3	9.38	183.32	9	High	High	High	High	High	High	High	High	High	High	High	High	High	High	High	High	High	High	High	High	High	High	High	High	1	0		0
High	Master Protein	G7KEI3	Sucrase/ferredoxin family protein OS=Medicago truncatula GN=MTR_5g096090 PE=4 SV=1	0	35.37	22	9	20	9	430	47.8	5.52	38.63	9	High	High	Not Found	High	Not Found	High	High	High	Not Found	Not Found	Not Found	High	High	High	High	High	Not Found	Not Found	Not Found	High	High	High	High	High	1	0		0
High	Master Protein	G7JU40	Serine/Threonine kinase family protein OS=Medicago truncatula GN=MTR_4g112900 PE=4 SV=1	0	74.634	31	9	28	9	342	38.1	6.76	119.56	9	Not Found	Not Found	High	High	High	High	High	Not Found	Not Found	High	High	High	Not Found	High	Not Found	Not Found	High	High	High	High	High	High	Not Found	High	1	0		0
High	Master Protein	G7JQP6	Isoleucine-tRNA ligase OS=Medicago truncatula GN=MTR_4g076850 PE=3 SV=2	0	32.734	8	9	15	9	1179	134	6.39	50.89	9	Not Found	High	High	High	Not Found	Not Found	High	High	Not Found	Not Found	High	Not Found	High	Not Found	Not Found	Not Found	Not Found	Not Found	High	High	High	Not Found	Not Found	High	1	0		0
High	Master Protein	G7IAV4	ALG2-interacting protein X OS=Medicago truncatula GN=MTR_1g108690 PE=4 SV=2	0	42.17	9	9	19	9	872	98.2	6.55	61	9	High	High	Not Found	High	Not Found	Not Found	High	Not Found	Not Found	High	Not Found	High	Not Found	High	High	Not Found	Not Found	High	Not Found	High	High	High	High	Not Found	1	0		0
High	Master Protein	G7K2K7	Tonoplast monosaccharide transporter 2 OS=Medicago truncatula GN=MTR_5g024740 PE=3 SV=2	0	112.761	19	9	58	9	726	77.5	5.17	281.65	9	Not Found	High	High	High	High	High	High	High	Not Found	Medium	High	High	High	High	High	High	Not Found	Not Found	High	High	High	High	High	High	1	2	Phospho [S384; T473]	0		Phospho [S384; T473]
High	Master Protein	I3SPQ1	60S ribosomal protein L32-1 OS=Medicago truncatula GN=MTR_7g053180 PE=2 SV=1	0	60.406	50	9	22	9	133	15.6	10.77	86.73	9	Not Found	High	High	Not Found	Not Found	High	High	High	Not Found	Not Found	Not Found	Not Found	Not Found	Not Found	Not Found	High	Not Found	Not Found	High	Not Found	High	Not Found	High	High	1	0		0
High	Master Protein	D5LQ68	Nitrate transporter NRT1.3 OS=Medicago truncatula GN=MTR_5g085850 PE=2 SV=1	0	54.336	14	9	25	9	588	64.8	8.92	88.95	9	High	High	High	High	Not Found	High	High	Not Found	High	High	High	Not Found	Not Found	Not Found	High	Not Found	Not Found	High	High	Not Found	High	High	High	Not Found	1	0		0
High	Master Protein	A0A072TZA9	Zinc-binding dehydrogenase family oxidoreductase OS=Medicago truncatula GN=MTR_7g034395 PE=4 SV=1	0	49.921	38	10	27	9	317	33.9	5.73	101.02	10	Not Found	High	High	High	High	Not Found	Not Found	Not Found	Not Found	High	High	Not Found	High	High	Not Found	Not Found	High	High	High	Not Found	High	High	High	Not Found	1	0		0
High	Master Protein	G7LD20	Aldehyde dehydrogenase OS=Medicago truncatula GN=MTR_8g076480 PE=3 SV=1	0	80.072	23	9	66	9	488	54.7	7.69	287.67	9	Not Found	High	High	High	High	High	High	High	Not Found	Not Found	Not Found	High	High	High	High	High	Not Found	Not Found	Not Found	High	High	High	High	High	1	0		0		Deamidated [R368]
High	Master Protein	A0A072UX31	NAD(P)H:quinone oxidoreductase, type IV protein OS=Medicago truncatula GN=MTR_4g069250 PE=3 SV=1	0	95.248	41	9	50	9	252	27.1	5.5	220.03	9	Not Found	High	High	Not Found	High	High	High	Not Found	Not Found	High	High	High	High	High	High	Not Found	Not Found	High	High	High	High	High	High	High	1	0		0
High	Master Protein	Q0GXX4	Auxin conjugate hydrolase OS=Medicago truncatula GN=IAR34 PE=2 SV=1	0	111.224	24	9	26	9	447	49.1	6.3	134.11	9	Not Found	High	High	High	Not Found	High	High	High	Not Found	Not Found	High	Not Found	Not Found	High	High	High	Not Found	Not Found	High	High	Not Found	High	High	High	1	0		0
High	Master Protein	A0A072VK31	LETM1-like protein OS=Medicago truncatula GN=MTR_1g058390 PE=4 SV=1	0	68.964	17	13	26	9	830	92.2	5.29	87.16	13	Not Found	High	High	Not Found	Not Found	Not Found	High	Not Found	Not Found	High	High	Not Found	Not Found	High	High	High	Not Found	High	High	Not Found	High	High	High	High	1	0		0
High	Master Protein	A0A072VHE7	Carboxypeptidase OS=Medicago truncatula GN=MTR_1g050545 PE=3 SV=1	0	58.016	23	9	24	9	496	55.1	5.58	92.55	9	Not Found	High	Not Found	Not Found	High	High	High	High	Not Found	Not Found	Not Found	High	Not Found	High	High	High	Not Found	Not Found	Not Found	Not Found	Not Found	High	High	High	1	0		0		Deamidated [Q256]
High	Master Protein	G7JR69	Uncoupling protein OS=Medicago truncatula GN=MTR_4g018750 PE=3 SV=1	0	103.255	46	16	101	9	303	32.4	9.51	340.68	16	Not Found	High	High	High	High	High	High	High	Not Found	Not Found	High	High	High	High	High	High	Not Found	Not Found	Not Found	High	High	High	High	High	1	0		0		Deamidated [Q44; Q200]
High	Master Protein	G7IW75	50S ribosomal protein L27 OS=Medicago truncatula GN=MTR_3g020680 PE=3 SV=1	0	79.634	30	9	63	9	193	21.3	10.4	236.18	9	Not Found	High	High	High	High	High	High	High	Not Found	Not Found	Not Found	High	High	High	High	High	High	High	High	High	High	High	High	High	1	0		0
High	Master Protein	A0A072TRW3	Amine oxidase OS=Medicago truncatula GN=MTR_8g069505 PE=3 SV=1	0	59.407	15	9	15	9	774	86.6	7.05	64.1	9	Not Found	Not Found	High	Not Found	High	Not Found	Not Found	Not Found	Not Found	High	High	Not Found	Not Found	High	High	High	Medium	Not Found	High	Not Found	Not Found	Not Found	Not Found	High	1	0		0
High	Master Protein	G7J3Q2	Molecular chaperone Hsp40/DnaJ family protein OS=Medicago truncatula GN=MTR_3g087030 PE=3 SV=1	0	52.799	18	9	18	9	438	47.8	9.35	68.6	9	Not Found	High	High	High	Not Found	High	High	Not Found	Not Found	Not Found	High	Not Found	Not Found	Not Found	Not Found	High	Not Found	Not Found	High	High	High	Not Found	High	Not Found	1	0		0
High	Master Protein	G7LGX8	Syntaxin of plants protein OS=Medicago truncatula GN=MTR_8g066340 PE=3 SV=1	0	104.592	54	14	51	9	274	30.1	6.32	171.07	14	Not Found	High	Not Found	High	High	High	Medium	Not Found	Not Found	Not Found	Not Found	High	Not Found	High	Not Found	Not Found	Not Found	High	High	Not Found	High	High	High	High	1	0		0
High	Master Protein	G7J7T5	NADH ubiquinone oxidoreductase B22-like subunit OS=Medicago truncatula GN=MTR_3g117550 PE=2 SV=1	0	103.529	60	9	41	9	117	13.7	8.43	209.41	9	Not Found	High	High	High	High	High	High	High	Not Found	Not Found	Not Found	High	High	High	High	Not Found	Not Found	Not Found	High	High	High	High	High	High	1	0		0
High	Master Protein	G7KKA7	Oligosaccharyltransferase subunit STT3 OS=Medicago truncatula GN=MTR_6g077750 PE=4 SV=1	0	61.947	14	9	39	9	727	81.6	8.87	150.31	9	High	High	Not Found	High	High	High	High	High	High	High	Not Found	High	High	High	Not Found	High	Not Found	High	Not Found	High	High	High	High	High	1	0		0		Deamidated [R688]
High	Master Protein	G7ZZ90	Monothiol glutaredoxin-S17 protein OS=Medicago truncatula GN=MTR_4g088905 PE=4 SV=1	0	79.549	30	9	16	9	491	53.9	5.39	93.19	9	Not Found	High	Not Found	High	High	Not Found	Not Found	High	High	Not Found	Not Found	Not Found	High	High	Not Found	Not Found	Not Found	Not Found	High	Not Found	High	High	High	High	1	0		0
High	Master Protein	A0A072VBJ9	Malectin/receptor-like kinase family protein OS=Medicago truncatula GN=MTR_2g080220 PE=4 SV=1	0	64.669	14	11	38	9	843	92.7	5.95	141.08	11	Not Found	Not Found	Not Found	High	High	High	High	High	Not Found	Not Found	High	High	Not Found	High	High	High	Not Found	Not Found	High	High	High	High	High	High	1	0		0
High	Master Protein	G7KQK8	Cytochrome P450 family monooxygenase OS=Medicago truncatula GN=MTR_7g079440 PE=3 SV=1	0	34.938	16	9	16	9	689	76.9	6.8	49.42	9	High	Not Found	Not Found	Not Found	High	High	Not Found	Not Found	High	High	High	Not Found	High	Not Found	Not Found	High	Not Found	High	High	Not Found	Medium	Not Found	High	High	1	0		0
High	Master Protein	A0A072U311	M50 family peptidase OS=Medicago truncatula GN=MTR_7g086430 PE=4 SV=1	0	71.927	22	9	43	9	419	46.5	6.15	171.52	9	High	Not Found	High	High	Not Found	High	High	High	High	Not Found	High	Not Found	Not Found	High	High	High	Not Found	Not Found	High	High	High	High	High	High	1	0		0
High	Master Protein	A0A072TYI2	ABC transporter B family protein OS=Medicago truncatula GN=MTR_7g023340 PE=4 SV=1	0	136.869	18	20	53	9	1404	155.5	6.35	235.75	20	Not Found	High	Not Found	High	Not Found	High	High	Not Found	Not Found	High	Not Found	Not Found	Not Found	High	High	Not Found	Not Found	High	Not Found	Not Found	Not Found	High	High	Not Found	1	1	Phospho [S741]	0		Phospho [S741]
High	Master Protein	G7IEH2	Legumin storage protein OS=Medicago truncatula GN=MTR_1g072630 PE=3 SV=1	0	250.071	46	22	262	9	569	65.3	6.58	1129.71	22	High	High	High	High	High	High	High	High	High	High	High	High	High	High	High	High	High	Not Found	High	High	High	High	High	High	1	0		0		Deamidated [R72; Q569]
High	Master Protein	A0A072UZM7	Sieve element occlusion protein OS=Medicago truncatula GN=MTR_3g075450 PE=4 SV=1	0	45.089	16	9	17	9	706	80.4	6.24	51.75	9	Not Found	Not Found	Not Found	High	High	High	High	High	Not Found	High	High	Not Found	Not Found	High	High	High	Not Found	Not Found	Not Found	High	Not Found	Not Found	High	High	1	0		0
High	Master Protein	G7II39	BZIP protein OS=Medicago truncatula GN=MTR_2g102050 PE=4 SV=1	0	50.065	13	11	32	9	760	86.7	6.34	118.14	11	Not Found	Not Found	High	Not Found	Not Found	High	High	High	Not Found	High	High	Not Found	Not Found	High	High	High	Not Found	High	Not Found	Not Found	High	High	High	High	1	0		0
High	Master Protein	G7JQF7	Acyl-CoA dehydrogenase OS=Medicago truncatula GN=MTR_4g060480 PE=2 SV=1	0	56.477	25	9	49	9	417	45.5	6.96	190.5	9	Not Found	High	High	High	High	High	High	High	Not Found	Not Found	Not Found	High	High	High	High	High	Not Found	Not Found	Not Found	High	High	High	High	High	1	0		0
High	Master Protein	A0A072VSV9	Ankyrin repeat plant-like protein OS=Medicago truncatula GN=MTR_1g115575 PE=4 SV=1	0	71.573	22	9	39	9	593	64.5	9.25	159.91	9	Not Found	Not Found	High	High	High	High	High	High	Not Found	High	High	High	High	High	High	High	Not Found	High	Not Found	High	High	High	High	High	1	0		0
High	Master Protein	G7LDJ8	Cytochrome P450 family protein OS=Medicago truncatula GN=MTR_8g035760 PE=4 SV=2	0	87.353	30	15	39	9	512	58.8	8.85	137.14	15	Not Found	Not Found	High	Not Found	High	High	High	High	Not Found	Not Found	Not Found	Not Found	High	High	High	High	High	Not Found	Not Found	High	High	High	High	Not Found	1	0		0
High	Master Protein	G7K2X9	LRR receptor-like kinase family protein OS=Medicago truncatula GN=MTR_5g087780 PE=4 SV=2	0	43.958	11	9	21	9	995	109.8	6.04	69.38	9	Not Found	Not Found	High	High	Medium	High	Not Found	High	Not Found	Not Found	Not Found	High	High	High	High	High	Not Found	Not Found	High	High	Not Found	High	High	Not Found	1	0		0
High	Master Protein	A0A072VJ38	Carotenoid isomerase OS=Medicago truncatula GN=MTR_1g054965 PE=4 SV=1	0	37.071	18	9	15	9	596	65.5	7.09	37.31	9	Not Found	Not Found	Not Found	Not Found	Not Found	Not Found	Not Found	High	Not Found	Not Found	Not Found	High	High	High	Not Found	High	High	Not Found	Not Found	High	High	Not Found	High	High	1	0		0
High	Master Protein	G7L970	Alanine aminotransferase OS=Medicago truncatula GN=MTR_8g023140 PE=4 SV=1	0	86.082	24	9	28	9	524	58	6.54	121.59	9	Not Found	Not Found	High	High	High	High	High	High	Not Found	Not Found	Not Found	Not Found	High	High	High	High	Not Found	Not Found	High	Not Found	High	High	High	Not Found	1	0		0
High	Master Protein	A0A072VAN1	Transmembrane protein, putative OS=Medicago truncatula GN=MTR_2g078540 PE=4 SV=1	0	58.196	30	9	41	9	271	29.4	7.59	165.73	9	High	High	High	High	Not Found	Medium	Not Found	High	High	High	High	High	Not Found	Not Found	Not Found	High	High	High	High	Not Found	High	Not Found	Not Found	Not Found	1	0		0
High	Master Protein	A0A072V1D2	Hipl2 protein OS=Medicago truncatula GN=MTR_4g107400 PE=4 SV=1	0	63.259	13	9	33	9	697	75.5	5.53	129.77	9	Not Found	High	Not Found	High	High	High	High	High	Not Found	High	High	High	High	High	High	High	Not Found	High	High	High	High	High	High	High	1	0		0
High	Master Protein	G7I6N5	60S ribosomal L4-like protein OS=Medicago truncatula GN=MTR_1g045410 PE=4 SV=1	0	293.202	61	37	269	9	406	44.7	10.43	1041.06	37	Not Found	High	High	High	High	Not Found	Not Found	Medium	Not Found	High	High	High	High	Not Found	Not Found	Not Found	Not Found	Not Found	High	High	High	Not Found	High	High	1	0		0		Deamidated [R38]
High	Master Protein	G7JEQ0	B-cell receptor-associated-like protein OS=Medicago truncatula GN=MTR_4g049540 PE=2 SV=1	0	67.576	29	9	54	9	221	25.1	9.01	211.27	9	Not Found	High	High	Not Found	High	High	High	Not Found	Not Found	High	High	High	Not Found	High	High	High	Not Found	High	High	High	Not Found	High	High	Not Found	1	0		0		Deamidated [Q142]
High	Master Protein	A0A072U5Y7	Glutaredoxin (GRX) family protein OS=Medicago truncatula GN=MTR_8g099665 PE=4 SV=1	0	58.66	30	9	20	9	368	40.8	8.07	79.64	9	Not Found	High	High	High	High	High	Not Found	Not Found	Not Found	Not Found	High	Not Found	Not Found	Not Found	Not Found	Not Found	Not Found	Not Found	High	High	High	Medium	Not Found	Not Found	1	1	Phospho [S115]	0		Phospho [S115]
High	Master Protein	G7L7J8	Lipoxygenase OS=Medicago truncatula GN=MTR_8g020970 PE=3 SV=1	0	45.812	12	9	21	9	927	104.7	7.84	66.55	9	Not Found	Not Found	High	High	Not Found	High	High	High	Not Found	Not Found	High	High	Not Found	Not Found	High	High	Not Found	Not Found	High	High	Not Found	High	High	High	1	0		0
High	Master Protein	A0A072THS2	Ribosomal protein OS=Medicago truncatula GN=MTR_0059s0060 PE=3 SV=1	0	46.128	25	9	33	9	359	39.4	8.88	120.19	9	Not Found	Not Found	High	High	High	High	High	High	Not Found	Not Found	High	High	High	High	High	High	Not Found	Not Found	Not Found	High	High	High	High	High	1	0		0
High	Master Protein	G7L4U3	4-alpha-glucanotransferase DPE2 OS=Medicago truncatula GN=MTR_7g088740 PE=4 SV=2	0	74.765	16	9	18	9	981	113	5.83	89.57	9	Not Found	Not Found	High	High	Not Found	Not Found	Not Found	High	Not Found	Not Found	High	High	High	Not Found	Not Found	Not Found	Not Found	High	High	High	Not Found	High	Not Found	Not Found	1	0		0
High	Master Protein	G7JAY7	TLD-domain nucleolar protein OS=Medicago truncatula GN=MTR_3g095660 PE=4 SV=1	0	86.382	22	9	48	9	531	58.8	6.02	202.91	9	High	High	High	High	High	High	High	High	Not Found	High	Not Found	High	High	High	High	High	High	High	High	High	High	High	High	High	1	0		0
High	Master Protein	G7K574	Indole-3-acetic acid-amido synthetase OS=Medicago truncatula GN=MTR_5g016320 PE=4 SV=1	0	57.094	20	9	26	9	600	68.1	5.64	107.42	9	Not Found	High	High	High	Not Found	High	High	Not Found	Not Found	Not Found	High	High	Not Found	High	Not Found	High	Not Found	Not Found	High	High	Not Found	High	Not Found	Not Found	1	0		0
High	Master Protein	G7JPY4	Delta-1-pyrroline-5-carboxylate dehydrogenase OS=Medicago truncatula GN=MTR_4g107940 PE=4 SV=1	0	34.083	18	9	17	9	553	61.3	6.83	47.32	9	Not Found	Not Found	High	High	High	High	High	High	Not Found	Not Found	Not Found	High	High	Not Found	Not Found	Not Found	Not Found	Not Found	Not Found	High	High	Not Found	Not Found	High	1	0		0
High	Master Protein	A0A072U1P3	Strictosidine synthase family protein OS=Medicago truncatula GN=MTR_7g490350 PE=4 SV=1	0	91.246	21	9	51	9	369	40.4	6.44	207.52	9	Not Found	High	High	Not Found	High	High	High	High	Not Found	High	High	Not Found	High	High	High	High	Not Found	High	High	High	High	High	High	High	1	0		0
High	Master Protein	G7K7B3	Ca(2+)-dependent nuclease-like protein OS=Medicago truncatula GN=MTR_5g083720 PE=2 SV=1	0	62.676	29	9	40	9	326	37	8.95	163.32	9	Not Found	High	High	High	High	High	High	High	Not Found	High	High	High	High	High	High	High	Not Found	High	Not Found	High	High	High	High	High	1	0		0
High	Master Protein	G7IBW3	Receptor-like kinase OS=Medicago truncatula GN=MTR_1g098360 PE=3 SV=1	0	64.415	26	9	24	9	383	42.9	7.21	113.19	9	Not Found	Not Found	High	Not Found	High	High	High	Not Found	Not Found	Not Found	Not Found	Not Found	High	High	High	High	Not Found	Not Found	High	High	Not Found	High	High	High	1	0		0
High	Master Protein	B7FN45	Transmembrane protein, putative OS=Medicago truncatula GN=MTR_7g072680 PE=2 SV=1	0	57.298	34	9	30	9	228	25.9	8.15	117.71	9	Not Found	High	High	High	High	High	High	High	Not Found	Not Found	High	High	High	High	Not Found	Not Found	Not Found	Not Found	High	High	High	High	High	High	1	0		0
High	Master Protein	B7FHV0	Phenylcoumaran benzylic ether reductase-like protein Fi1 OS=Medicago truncatula GN=MTR_5g020740 PE=2 SV=1	0	79.546	44	10	48	9	309	33.8	5.88	156.27	10	Not Found	High	Not Found	High	High	High	High	High	Not Found	Not Found	Not Found	High	High	High	High	High	Not Found	Not Found	Not Found	High	High	High	High	High	1	0		0
High	Master Protein	G7ITV2	Cellulose synthase-like protein OS=Medicago truncatula GN=MTR_2g087950 PE=3 SV=1	0	88.277	14	9	29	9	781	89	7.44	150.38	9	Not Found	Not Found	Not Found	High	High	High	High	High	Not Found	Not Found	Not Found	High	High	High	High	Not Found	Not Found	Not Found	Not Found	High	High	High	High	High	1	0		0
High	Master Protein	G7IB89	Histone deacetylase superfamily protein OS=Medicago truncatula GN=MTR_1g016440 PE=4 SV=1	0	54.28	26	9	25	9	350	38.9	6.93	106.54	9	Not Found	High	High	High	High	Not Found	High	High	Not Found	High	High	High	High	High	High	High	Not Found	High	High	High	Not Found	High	Not Found	Not Found	1	0		0
High	Master Protein	I3SZM1	Thylakoid membrane phosphoprotein 14 kDa protein OS=Medicago truncatula GN=MTR_7g116795 PE=2 SV=1	0	122.212	27	9	146	9	161	17.6	9.2	644.6	9	High	High	High	High	High	High	High	High	Not Found	High	High	High	High	High	High	High	High	High	High	High	High	High	High	High	1	5	Phospho [S59; S60; S61; T64; S67]	0		Phospho [S59; S60; S61; T64; S67]
High	Master Protein	G7K556	RAP annotation release 2, NERD domain protein OS=Medicago truncatula GN=MTR_5g007360 PE=4 SV=1	0	65.219	24	9	36	9	322	36.1	8.18	132.59	9	High	Not Found	High	High	High	High	High	Not Found	High	Not Found	High	High	High	High	High	Medium	High	Not Found	High	High	High	High	High	High	1	0		0
High	Master Protein	Q45FF2	Pyridoxal biosynthesis protein PDX1, putative OS=Medicago truncatula GN=MTR_2g017520 PE=2 SV=1	0	39.357	28	9	17	9	314	33.5	5.9	53.96	9	Not Found	Not Found	High	High	Not Found	High	Not Found	High	Not Found	Not Found	High	Not Found	Not Found	Not Found	Not Found	Not Found	Not Found	Not Found	High	High	Not Found	High	Not Found	High	1	0		0
High	Master Protein	A0A072V0N1	Protein translocase subunit SecA OS=Medicago truncatula GN=MTR_3g088555 PE=3 SV=1	0	47.345	14	10	17	9	976	110.3	6.6	63	10	Not Found	High	Not Found	High	Not Found	Not Found	High	Not Found	Not Found	Not Found	High	High	High	High	Not Found	High	Not Found	High	Not Found	Not Found	High	High	High	High	1	0		0		Deamidated [Q708]
High	Master Protein	G7JKF9	Heat shock protein 70 (HSP70)-interacting protein, putative OS=Medicago truncatula GN=MTR_4g132780 PE=4 SV=2	0	54.838	16	9	23	9	769	85.4	5.38	102.07	9	Not Found	High	High	High	High	Not Found	Not Found	Not Found	Medium	High	High	High	High	High	Not Found	Not Found	High	High	High	High	High	High	Not Found	Not Found	1	0		0
High	Master Protein	Q2HVS3	60S ribosomal L34-like protein OS=Medicago truncatula GN=MTR_7g010150 PE=2 SV=1	0	38.662	40	9	69	9	120	13.8	11.68	200.12	9	Not Found	High	High	High	High	High	High	High	Not Found	High	Not Found	High	High	High	High	High	High	High	High	High	High	High	High	High	1	0		0
High	Master Protein	A0A072V7H2	Proteasome activator complex subunit-like protein OS=Medicago truncatula GN=MTR_3g461520 PE=4 SV=1	0	36.745	6	9	15	9	1766	197.5	7.28	46.99	9	Not Found	Not Found	Not Found	High	Medium	Medium	High	Not Found	Not Found	Not Found	High	Not Found	Not Found	Not Found	High	High	Not Found	Not Found	Not Found	High	High	Medium	High	High	1	0		0
High	Master Protein	G7J9T2	Protein phosphatase 2C-like protein OS=Medicago truncatula GN=MTR_3g105880 PE=2 SV=1	0	68.345	40	11	22	9	362	39.9	5.26	89.52	11	Not Found	High	Not Found	High	Not Found	Not Found	High	Not Found	High	High	Not Found	High	Not Found	Not Found	Not Found	Not Found	High	High	High	Not Found	Not Found	Not Found	Not Found	High	1	0		0
High	Master Protein	A0A072VJI1	Histidyl-tRNA synthetase OS=Medicago truncatula GN=MTR_1g057860 PE=3 SV=1	0	32.819	10	9	16	9	868	96.1	6.28	50.19	9	Not Found	High	High	High	High	Not Found	High	High	Not Found	Not Found	High	Not Found	High	Not Found	High	Not Found	Not Found	Not Found	High	Not Found	High	Not Found	Not Found	High	1	0		0
High	Master Protein	G7KWG4	Receptor-like kinase plant OS=Medicago truncatula GN=MTR_7g111690 PE=4 SV=1	0	63.019	19	10	36	9	514	57.1	8.4	127.61	10	Not Found	High	High	High	Not Found	Not Found	Not Found	High	Not Found	High	High	High	High	Not Found	High	Not Found	Not Found	High	High	High	High	Not Found	Not Found	High	1	0		0		Deamidated [R84]
High	Master Protein	G7INW0	Calmodulin-binding transcription activator 1 OS=Medicago truncatula GN=MTR_2g008840 PE=4 SV=2	0	71.341	12	10	23	9	1040	116.7	5.97	97.83	10	Not Found	High	High	Not Found	High	High	Not Found	Not Found	Not Found	High	Not Found	High	High	High	Not Found	Not Found	Not Found	High	Not Found	High	High	Not Found	High	Not Found	1	0		0
High	Master Protein	A0A072VAU0	Rhamnose biosynthetic-like enzyme OS=Medicago truncatula GN=MTR_2g073240 PE=4 SV=1	0	107.805	29	18	71	9	682	76.7	6.77	218.95	18	Not Found	Not Found	High	High	High	High	High	High	Not Found	Not Found	Not Found	Not Found	High	High	High	High	Not Found	Not Found	Not Found	High	High	High	High	High	1	0		0		Deamidated [Q206]
High	Master Protein	A0A072TWK0	Patatin OS=Medicago truncatula GN=MTR_8g007140 PE=3 SV=1	0	79.505	23	11	50	9	409	44.9	5.48	182.33	11	High	High	High	High	Not Found	Not Found	High	High	Not Found	High	High	Not Found	Not Found	High	High	High	High	High	Not Found	Not Found	Not Found	High	High	High	1	0		0
High	Master Protein	A0A072TWF8	60S ribosomal protein L2, related protein OS=Medicago truncatula GN=MTR_7g007070 PE=4 SV=1	0	61.771	57	9	25	9	208	22.6	11.22	98.11	9	Not Found	High	High	Not Found	High	Not Found	Not Found	High	Not Found	High	High	High	High	High	Not Found	High	Not Found	Medium	Not Found	High	High	High	Not Found	High	1	0		0
High	Master Protein	G7II91	NADH-ubiquinone oxidoreductase 24 kDa subunit, putative OS=Medicago truncatula GN=MTR_2g104110 PE=4 SV=1	0	65.24	27	9	59	9	251	28	7.44	212.05	9	Not Found	High	High	High	High	High	High	High	Not Found	Not Found	High	High	High	High	High	High	Not Found	Not Found	High	High	High	High	High	High	1	0		0
High	Master Protein	A0A072UHP4	Uncharacterized protein OS=Medicago truncatula GN=MTR_4g017880 PE=4 SV=1	0	74.267	36	9	62	9	194	20.8	4.82	235.67	9	Not Found	High	High	High	High	High	High	High	Not Found	High	High	High	High	High	High	High	Medium	High	High	High	High	High	High	High	1	0		0
High	Master Protein	A0A072VLL6	Glutathione S-transferase tau OS=Medicago truncatula GN=MTR_1g067180 PE=4 SV=1	0	45.43	42	9	13	9	234	27	5.64	47.01	9	Not Found	High	Not Found	High	High	High	Not Found	High	Not Found	Not Found	Not Found	Not Found	Not Found	High	Not Found	High	Not Found	Not Found	Not Found	High	Not Found	High	Not Found	High	1	0		0
High	Master Protein	G7IPS9	DUF2921 family protein OS=Medicago truncatula GN=MTR_2g013640 PE=4 SV=2	0	47.857	12	9	17	9	937	106.3	8.97	57.67	9	Not Found	Not Found	Not Found	Not Found	Not Found	High	High	High	Not Found	High	High	Not Found	Not Found	Not Found	Not Found	High	Not Found	High	High	High	High	High	Not Found	High	1	0		0
High	Master Protein	B7FK85	Sucrase/ferredoxin family protein OS=Medicago truncatula GN=MTR_7g033625 PE=2 SV=1	0	54.357	27	9	40	9	344	37.7	6.39	163.6	9	Not Found	High	Not Found	High	High	High	High	High	Not Found	High	High	High	High	High	High	High	Not Found	High	High	Not Found	High	High	High	High	1	0		0
High	Master Protein	G7JLG0	Argininosuccinate synthase OS=Medicago truncatula GN=MTR_4g103680 PE=3 SV=1	0	45.161	22	11	21	9	478	52.4	7.18	65.86	11	Not Found	High	High	Not Found	High	High	High	Not Found	Not Found	Not Found	High	Not Found	Not Found	High	High	High	Not Found	Not Found	Not Found	High	High	High	High	High	1	0		0
High	Master Protein	G7K3P1	40S ribosomal protein S3a OS=Medicago truncatula GN=MTR_5g006440 PE=3 SV=1	0	197.766	52	19	156	9	261	29.8	9.86	720.99	19	High	High	High	High	High	High	High	High	Not Found	High	High	High	High	High	High	High	Not Found	Not Found	High	High	High	High	High	High	1	0		0
High	Master Protein	G7IU50	V-type proton ATPase subunit a OS=Medicago truncatula GN=MTR_2g093210 PE=3 SV=2	0	73.174	13	10	24	9	818	93.6	6.34	96.53	10	Not Found	Not Found	Not Found	Not Found	High	High	High	High	Not Found	Not Found	High	High	High	High	Not Found	Not Found	Not Found	Not Found	Not Found	High	High	High	High	High	1	0		0
High	Master Protein	A2Q570	Beta-galactosidase OS=Medicago truncatula GN=MTR_2g039120 PE=3 SV=1	0	67.379	17	11	24	9	726	81.5	8.56	76.61	11	Not Found	Not Found	High	High	High	High	High	High	Not Found	Not Found	High	Not Found	High	High	Not Found	Not Found	Not Found	Not Found	Not Found	Not Found	Not Found	High	High	High	1	0		0
High	Master Protein	A0A072V6N9	Nucleosome assembly protein OS=Medicago truncatula GN=MTR_2g039680 PE=3 SV=1	0	89.795	30	9	32	9	343	39.2	4.36	157.68	9	Not Found	High	High	Not Found	High	High	High	High	High	High	High	Not Found	Not Found	Not Found	High	High	High	High	High	Not Found	Not Found	High	High	High	1	0		0		Deamidated [R144]
High	Master Protein	G7J4E2	NAD(P)-binding rossmann-fold protein OS=Medicago truncatula GN=MTR_3g087860 PE=3 SV=1	0	34.679	33	9	24	9	284	30.9	9.25	72.14	9	Not Found	High	Not Found	Not Found	High	High	Not Found	High	Not Found	High	High	Not Found	High	High	High	High	Not Found	High	Not Found	Not Found	High	High	High	High	1	0		0
High	Master Protein	G7KAU2	PQ-loop protein/transmembrane family protein OS=Medicago truncatula GN=MTR_5g019120 PE=4 SV=1	0	66.018	19	9	56	9	380	43	8.82	201.21	9	Not Found	Not Found	High	High	High	High	High	High	Not Found	Not Found	High	High	High	High	High	High	Not Found	Not Found	High	High	High	High	High	High	1	0		0
High	Master Protein	G7I879	Transmembrane 9 superfamily member OS=Medicago truncatula GN=MTR_1g014080 PE=3 SV=1	0	80.331	18	12	61	9	637	73.1	7.96	248.45	12	Not Found	High	High	High	High	High	High	High	Not Found	Not Found	Not Found	High	High	High	High	High	High	Not Found	Not Found	High	High	High	High	High	1	0		0
High	Master Protein	A0A072U8E2	S-acyltransferase OS=Medicago truncatula GN=MTR_6g033315 PE=3 SV=1	0	73.344	27	10	42	9	439	49.4	8.48	173.14	10	Not Found	High	High	High	High	High	High	High	Not Found	Not Found	High	High	High	High	Not Found	High	Not Found	High	High	High	High	High	High	High	1	1	Phospho [S376]	0		Phospho [S376]
High	Master Protein	A0A072TT49	Polysaccharide biosynthesis protein OS=Medicago truncatula GN=MTR_8g080660 PE=4 SV=1	0	84.246	36	9	41	9	297	33.7	7.52	170.96	9	Not Found	Not Found	High	High	High	High	High	High	Not Found	High	Not Found	High	High	High	Not Found	High	Not Found	High	High	High	High	High	Not Found	Not Found	1	0		0
High	Master Protein	G7LFW2	VHS domain plant protein OS=Medicago truncatula GN=MTR_8g013720 PE=4 SV=1	0	62.642	19	9	12	9	709	77.4	5.97	47.48	9	Not Found	Not Found	Not Found	Not Found	Not Found	High	Not Found	Not Found	Not Found	Not Found	Not Found	Not Found	Not Found	High	High	Not Found	Not Found	Not Found	High	High	Not Found	High	High	High	1	0		0
High	Master Protein	A0A072UPB6	Ubiquinol oxidase OS=Medicago truncatula GN=MTR_4g094222 PE=3 SV=1	0	89.922	23	10	111	9	345	39.3	9.2	425.24	10	Medium	High	High	High	High	High	High	High	Not Found	High	High	High	High	High	High	High	High	High	High	High	High	High	High	High	1	0		0		Deamidated [R103]
High	Master Protein	A0A072V290	Amine oxidase OS=Medicago truncatula GN=MTR_4g117610 PE=3 SV=1	0	82.864	24	11	37	9	668	75.8	6.57	165.27	11	Not Found	High	Not Found	High	High	Not Found	High	High	Not Found	Not Found	High	Not Found	High	Not Found	High	High	Not Found	Not Found	High	High	High	High	High	High	1	0		0
High	Master Protein	G8A093	Sulfurtransferase OS=Medicago truncatula GN=MTR_2g067080 PE=4 SV=1	0	61.348	33	9	25	9	381	41.9	6.86	112.4	9	High	High	High	High	High	High	High	Not Found	Not Found	Not Found	High	Not Found	High	High	High	High	Not Found	High	High	Not Found	High	High	High	High	1	0		0
High	Master Protein	A2Q2S7	General substrate transporter OS=Medicago truncatula GN=MTR_7g005910 PE=3 SV=1	0	65.251	10	9	37	9	500	54.2	6.04	170.77	9	Not Found	High	High	High	High	High	High	High	Not Found	High	High	Medium	High	High	Not Found	High	High	High	High	Not Found	High	High	High	High	1	0		0
High	Master Protein	A0A072URD9	Pyruvate orthophosphate dikinase OS=Medicago truncatula GN=MTR_4g118355 PE=4 SV=1	0	30.907	30	9	20	9	295	32.3	5.17	45.24	9	Not Found	Not Found	Not Found	High	High	High	High	Not Found	Not Found	High	Not Found	Not Found	High	High	Not Found	High	Not Found	High	Not Found	High	High	High	High	High	1	0		0
High	Master Protein	A0A072UZG1	DEAD-box ATP-dependent RNA helicase OS=Medicago truncatula GN=MTR_3g467550 PE=3 SV=1	0	58.481	24	10	17	9	530	57.5	7.36	68.56	10	Not Found	Not Found	Not Found	High	High	High	Not Found	High	Not Found	Not Found	Not Found	High	High	High	Not Found	High	Not Found	Not Found	Not Found	High	High	High	High	Not Found	1	0		0
High	Master Protein	G7IA59	DEAD-box ATP-dependent RNA helicase-like protein OS=Medicago truncatula GN=MTR_1g061970 PE=4 SV=1	0	59.856	23	9	34	9	491	54.9	5.83	150.02	9	Not Found	High	Not Found	High	High	High	High	Not Found	Not Found	High	Not Found	High	High	High	High	Not Found	Not Found	High	High	High	High	High	High	Not Found	1	0		0		Deamidated [Q165]
High	Master Protein	G7JPM8	Gamma-aminobutyrate transaminase OS=Medicago truncatula GN=MTR_4g076100 PE=3 SV=1	0	55.4	21	9	20	9	513	56.5	7.78	74.72	9	Not Found	Not Found	High	High	High	Not Found	Not Found	Not Found	Not Found	Not Found	High	High	High	Not Found	Not Found	High	Not Found	Not Found	High	High	High	Not Found	Not Found	Not Found	1	0		0
High	Master Protein	A0A072UHU0	LRR receptor-like kinase OS=Medicago truncatula GN=MTR_4g020070 PE=4 SV=1	0	70.271	34	11	45	9	409	46.5	6.6	175.86	11	Not Found	Not Found	Not Found	High	High	High	High	Not Found	Not Found	High	Not Found	High	Not Found	High	High	Not Found	Not Found	Not Found	Not Found	High	High	High	High	Not Found	1	0		0
High	Master Protein	G7JAJ0	Clathrin assembly plant-like protein, putative OS=Medicago truncatula GN=MTR_3g106900 PE=4 SV=2	0	55.214	19	9	21	9	641	70.8	5.66	70.55	9	High	High	High	High	High	High	High	High	Not Found	Not Found	Not Found	Not Found	High	High	High	Not Found	Not Found	High	Not Found	Not Found	High	High	High	Not Found	1	1	Phospho [S205]	0		Phospho [S205]
High	Master Protein	G7L1P5	Transmembrane protein, putative OS=Medicago truncatula GN=MTR_7g100570 PE=4 SV=1	0	72.91	38	9	34	9	145	16.6	9.57	123.12	9	High	High	High	High	Not Found	High	High	High	Not Found	Not Found	High	High	High	High	High	High	Not Found	Not Found	High	High	Not Found	High	High	High	1	0		0
High	Master Protein	A0A072VIQ6	Ubiquitin carboxyl-terminal hydrolase-like protein OS=Medicago truncatula GN=MTR_1g041240 PE=3 SV=1	0	48.655	11	10	15	9	1118	130.9	5.88	50.89	10	Not Found	Not Found	High	High	High	Not Found	Not Found	High	Not Found	Not Found	High	Not Found	Not Found	Not Found	Not Found	High	Not Found	Not Found	High	Not Found	Not Found	High	Not Found	High	1	0		0
High	Master Protein	A2Q4U4	Rhodanese-like OS=Medicago truncatula GN=MTR_7g092820 PE=2 SV=1	0	113.778	31	9	133	9	234	25.6	8.68	515.03	9	High	High	High	High	High	High	High	High	High	High	High	High	High	High	High	High	High	High	High	High	High	High	High	High	1	0		0		Deamidated [R70]
High	Master Protein	A2Q5A5	NADH-quinone oxidoreductase subunit B OS=Medicago truncatula GN=ndhK PE=3 SV=1	0	85.33	43	9	39	9	227	25.7	8.73	217.27	9	Not Found	High	High	High	High	High	High	High	Not Found	Not Found	High	Not Found	Not Found	High	High	High	Not Found	Not Found	High	High	High	High	High	High	1	0		0		Deamidated [Q95]
High	Master Protein	G7J9Z8	2-nitropropane dioxygenase-like protein OS=Medicago truncatula GN=MTR_3g069190 PE=4 SV=1	0	59.684	41	9	19	9	330	35.6	5.96	86.95	9	Not Found	Not Found	High	High	High	High	High	Not Found	Not Found	Not Found	High	Medium	High	High	Not Found	High	Not Found	Not Found	High	High	Not Found	High	Not Found	High	1	0		0
High	Master Protein	A0A072UHC9	Disease resistance protein (TIR-NBS-LRR class) OS=Medicago truncatula GN=MTR_4g023400 PE=4 SV=1	0	42.689	8	10	16	9	1436	163.4	7.96	52.05	10	Not Found	High	High	High	Not Found	Not Found	Not Found	High	Not Found	Not Found	Not Found	High	Not Found	High	Not Found	High	Not Found	Not Found	Not Found	High	Not Found	Not Found	Not Found	High	1	0		0
High	Master Protein	B7FHY0	Ribosomal protein L10 family protein OS=Medicago truncatula GN=MTR_4g131540 PE=2 SV=1	0	62.409	32	9	34	9	234	26.5	9.1	130.27	9	Not Found	Not Found	High	High	Not Found	High	High	High	Medium	Not Found	High	High	High	High	High	High	Medium	Not Found	High	High	High	High	High	High	1	0		0
High	Master Protein	G7KYM9	Lipoxygenase OS=Medicago truncatula GN=MTR_7g113410 PE=3 SV=2	0	91.664	18	12	34	9	867	98.3	6.16	146.29	12	Not Found	Not Found	High	High	High	High	High	Not Found	Not Found	Not Found	High	High	Not Found	High	Not Found	High	Not Found	Not Found	High	High	High	High	High	Not Found	1	0		0
High	Master Protein	A0A072TYD9	Pyruvate dehydrogenase E1 component subunit alpha OS=Medicago truncatula GN=MTR_8g024310 PE=4 SV=1	0	62.139	17	9	13	9	427	47.3	7.11	64.67	9	Not Found	High	High	High	Not Found	Not Found	Not Found	Not Found	High	Not Found	High	High	Not Found	Not Found	Not Found	Not Found	Not Found	Not Found	High	High	High	Not Found	Not Found	Not Found	1	0		0
High	Master Protein	A0A072VKG9	S-adenosylmethionine-dependent methyltransferase, putative OS=Medicago truncatula GN=MTR_1g069785 PE=4 SV=1	0	73.92	25	12	44	9	596	68	8.51	121.15	12	Not Found	High	High	High	Not Found	High	High	High	Not Found	Not Found	High	High	Not Found	High	Not Found	High	Not Found	Not Found	High	High	High	Not Found	Not Found	High	1	0		0
High	Master Protein	A0A072U7I8	Chlorophyll a-b binding protein, chloroplastic OS=Medicago truncatula GN=MTR_6g033320 PE=3 SV=1	0	118.356	24	9	146	9	242	26.4	7.02	598.53	9	High	High	High	High	High	High	High	High	High	High	High	High	High	High	High	High	High	High	High	High	High	High	High	High	1	0		0
High	Master Protein	I3SKT5	40S ribosomal protein S5-2 OS=Medicago truncatula GN=MTR_7g107380 PE=2 SV=1	0	55.688	26	9	68	9	206	23	9.57	243.75	9	Not Found	High	Not Found	High	High	High	High	High	Not Found	Not Found	Not Found	High	High	High	High	High	Not Found	Not Found	Not Found	High	High	High	High	High	1	0		0
High	Master Protein	A0A072V3V9	D-erythro-sphingosine kinase/diacylglycerol kinase OS=Medicago truncatula GN=MTR_2g011820 PE=4 SV=1	0	59.772	18	9	25	9	484	53.5	6.47	90.25	9	Not Found	High	High	High	High	High	High	Not Found	Not Found	Not Found	Not Found	High	High	High	High	High	Not Found	Not Found	High	High	High	High	High	Not Found	1	0		0
High	Master Protein	A0A072UM15	Glycosyltransferase OS=Medicago truncatula GN=MTR_4g069260 PE=3 SV=1	0	38.329	25	11	26	9	437	49.7	8.73	75.7	11	High	High	High	High	Not Found	Not Found	Not Found	Not Found	High	High	High	Not Found	Not Found	High	Not Found	Not Found	High	High	High	Not Found	High	High	Not Found	High	1	0		0		Deamidated [Q117; R412]
High	Master Protein	G7K9K1	26S proteasome non-ATPase regulatory subunit-like protein OS=Medicago truncatula GN=MTR_5g027960 PE=4 SV=1	0	28.7	23	9	30	9	386	44.1	5.39	85.88	9	Not Found	Not Found	Not Found	High	High	High	High	High	Not Found	Not Found	High	High	High	High	High	High	Not Found	High	Not Found	High	High	High	High	High	1	0		0
High	Master Protein	A0A072UX76	ATP-dependent zinc metalloprotease FTSH protein OS=Medicago truncatula GN=MTR_3g462930 PE=3 SV=1	0	62.812	19	14	33	9	791	86.4	7.74	97.54	14	Not Found	High	High	High	High	Medium	Not Found	High	Not Found	Not Found	Not Found	High	Not Found	High	Not Found	Not Found	Not Found	Not Found	Medium	High	High	Medium	Medium	Medium	1	0		0
High	Master Protein	G7ZYG6	Sec1-family transporter OS=Medicago truncatula GN=MTR_4g094405 PE=3 SV=1	0	58.138	17	9	28	9	624	69.4	6.39	103.21	9	Not Found	Not Found	Not Found	Not Found	High	High	High	High	Not Found	Not Found	High	High	High	High	High	High	Not Found	Not Found	Not Found	Not Found	Not Found	High	High	High	1	0		0
High	Master Protein	A0A072VNA2	Uncharacterized protein OS=Medicago truncatula GN=MTR_1g077190 PE=4 SV=1	0	52.963	13	9	18	9	753	84.2	5.67	69.04	9	Not Found	Not Found	High	High	Not Found	High	Not Found	Not Found	Not Found	Not Found	High	Not Found	Not Found	Not Found	Not Found	Not Found	Not Found	Not Found	High	High	Not Found	Not Found	Not Found	Not Found	1	0		0
High	Master Protein	A2Q4I7	Hydroxymethylglutaryl-CoA lyase OS=Medicago truncatula GN=MTR_7g089330 PE=4 SV=1	0	28.166	23	9	17	9	402	42.9	8.53	38.83	9	Not Found	Not Found	High	High	Not Found	Not Found	Not Found	Not Found	Not Found	Medium	High	High	High	Not Found	Not Found	High	Not Found	Not Found	High	High	High	High	Not Found	Not Found	1	0		0
High	Master Protein	Q84RD8	Adenosylhomocysteinase OS=Medicago truncatula GN=AHC2 PE=3 SV=1	0	104.792	29	16	100	9	485	53.2	6.01	322.11	16	High	High	High	High	High	High	High	High	High	Not Found	High	High	High	High	Not Found	High	High	High	High	High	High	High	High	High	1	0		0		Deamidated [Q215; Q217]
High	Master Protein	A0A072VEZ0	VAC14-like protein OS=Medicago truncatula GN=MTR_1g032110 PE=4 SV=1	0	26.474	12	9	12	9	702	78.8	5.88	27.43	9	Not Found	Not Found	Not Found	High	High	Not Found	Not Found	High	Medium	High	High	Not Found	High	Not Found	High	High	Medium	Not Found	Not Found	Not Found	High	Not Found	Not Found	Not Found	1	0		0
High	Master Protein	B7FHR0	60S ribosomal L4-like protein OS=Medicago truncatula GN=MTR_5g025120 PE=2 SV=1	0	302.043	65	37	276	9	408	44.9	10.4	1027.98	37	Not Found	High	High	High	High	High	High	High	Not Found	Not Found	High	High	High	High	High	High	Not Found	Not Found	High	High	High	High	High	High	1	0		0		Deamidated [R40]
High	Master Protein	A0A072TPT8	Calmodulin-binding receptor-like cytoplasmic kinase OS=Medicago truncatula GN=MTR_8g028880 PE=3 SV=1	0	57.734	28	11	37	9	440	48.8	9.07	114.23	11	Not Found	Not Found	Not Found	High	Not Found	High	High	Not Found	Not Found	Not Found	Not Found	High	High	High	High	High	Not Found	Not Found	High	High	High	High	High	High	1	0		0
[truncated: 6,728 more rows]

## Sheet: FACTLC
Protein FDR Confidence: Combined	Master	Accession	Description	Exp. q-value: Combined	Sum PEP Score	Coverage [%]	# Peptides	# PSMs	# Unique Peptides	# AAs	MW [kDa]	calc. pI	Score Sequest HT: Sequest HT	# Peptides (by Search Engine): Sequest HT	Found in Sample: [S25] F25: Sample	Found in Sample: [S26] F26: Sample	Found in Sample: [S27] F27: Sample	Found in Sample: [S28] F28: Sample	Found in Sample: [S29] F29: Sample	Found in Sample: [S30] F30: Sample	Found in Sample: [S31] F31: Sample	Found in Sample: [S32] F32: Sample	Found in Sample: [S33] F33: Sample	Found in Sample: [S34] F34: Sample	Found in Sample: [S35] F35: Sample	Found in Sample: [S36] F36: Sample	Found in Sample: [S37] F37: Sample	Found in Sample: [S38] F38: Sample	Found in Sample: [S39] F39: Sample	Found in Sample: [S40] F40: Sample	Found in Sample: [S41] F41: Sample	Found in Sample: [S42] F42: Sample	Found in Sample: [S43] F43: Sample	Found in Sample: [S44] F44: Sample	Found in Sample: [S45] F45: Sample	Found in Sample: [S46] F46: Sample	Found in Sample: [S47] F47: Sample	Found in Sample: [S48] F48: Sample	# Protein Groups	Phospho (S; T; Y) Count	Phospho (S; T; Y) Positions	Acetyl (K) Count	Acetyl (K) Positions	Modifications
[truncated: 7,118 more rows]
